# Supplementary material for: Physiological and Transcriptomic Analysis Revealed the Molecular Mechanism of Pinus koraiensis Responses to Light
Source: MDPI journal article supplement (doi:10.3390/ijms232113608), 2022-11-06
Supplement: s1 [file s1]

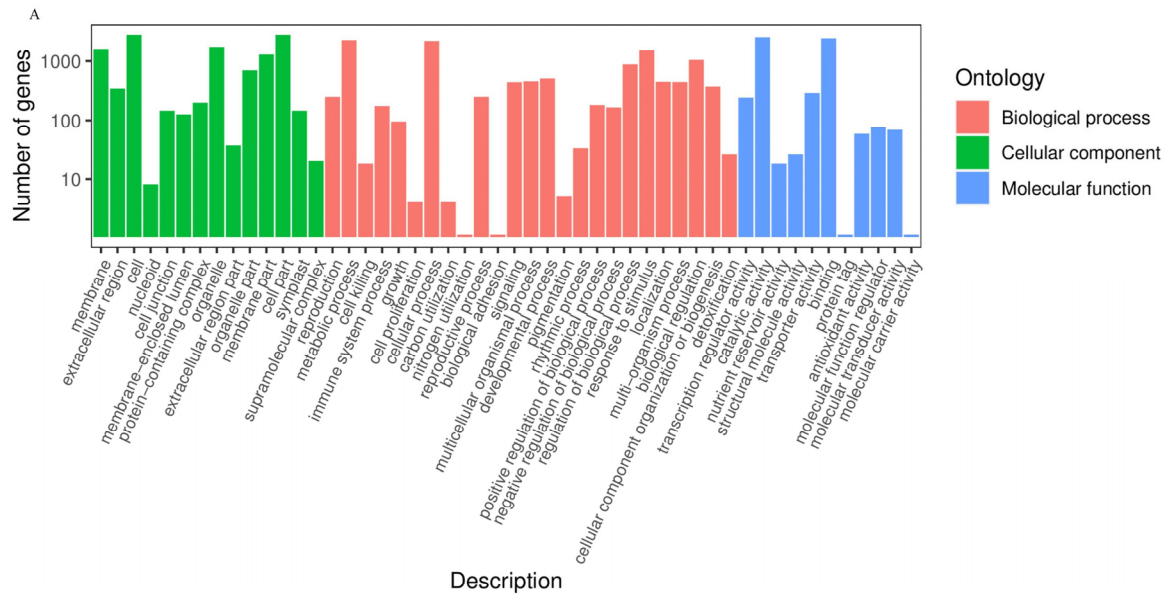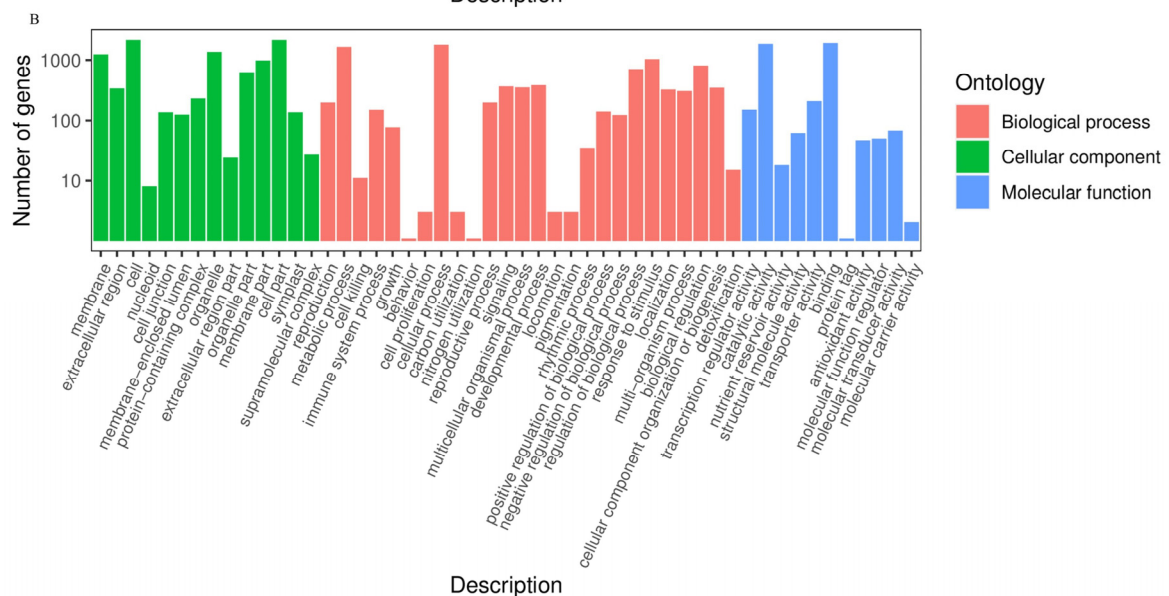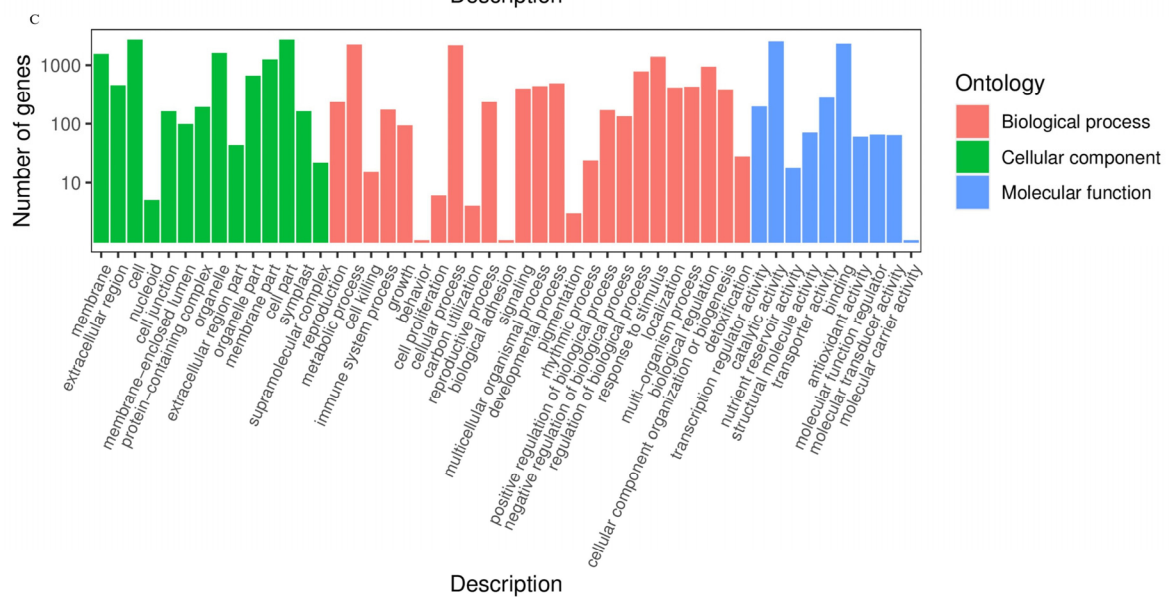

**Figure S1:** GO classification of differentially expressed genes in *P. koraiensis* under different supplementary lights. (A) The GO classification of DEGs in CK vs. L4. (B) The GO classification of DEGs in CK vs. In4. (C) The GO classification of DEGs in L4 vs. In4.

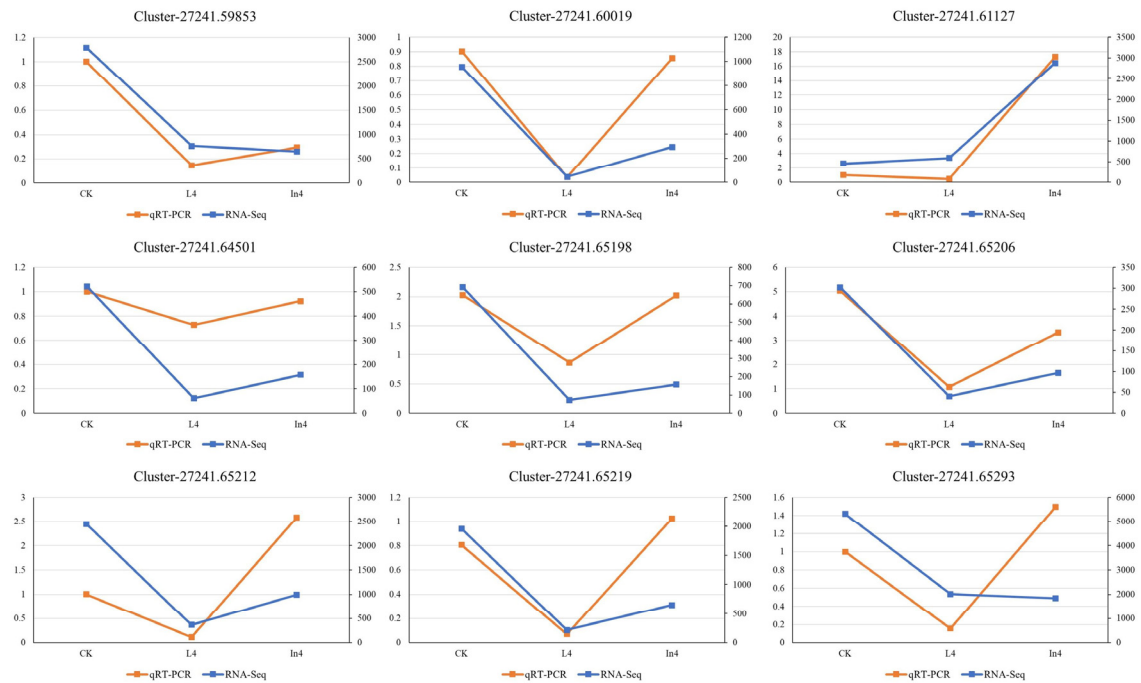

**Figure S2:** qRT-PCR verification of the expression levels of nine DEGs identified by RNA-Seq. The X-axis represents the different samples. The Y-axis on the right represents the FPKM value obtained by RNA-seq, while the Y-axis on the left indicates the relative gene expression levels analyzed by qRT-PCR.
