# Supplementary material for: Physiological and Transcriptomic Analysis Revealed the Molecular Mechanism of Pinus koraiensis Responses to Light
Source: Int J Mol Sci. 2022 Nov 6;23(21):13608. doi: 10.3390/ijms232113608 (PMC9653891; doi:10.3390/ijms232113608)
Supplement: Supplementary file 1 [file ijms-23-13608-s001.zip]

Archive with 16 entries (16 files):
- Supplementary Figures.pdf
- Table S1 ANOVA of multiple traits for P. koraiensis.xlsx
- Table S10 Statistics of differentially expressed genes involved in plant hormone signal transduction.xlsx
- Table S11 Statistics of differentially expressed genes involved in Circadian rhythm - plant.xlsx
- Table S12 Statistics of differentially expressed genes involved in Flavonoid biosynthesis.xlsx
- Table S13 Spectrogram data of LED.xlsx
- Table S14 Spectrogram data of incandescent lamp.xlsx
- Table S15 Specific primers used for qRT-PCR analysis.xlsx
- Table S2 Sample sequencing data evaluation statistics.xlsx
- Table S3 BUSCO assessment results.xlsx
- Table S4 GO functional annotation of differentially expressed genes (DEGs).xlsx
- Table S5 The top 20 KEGG enrichment pathways of DEGs in CK vs. L4.xlsx
- Table S6 The top 20 KEGG enrichment pathways of DEGs in CK vs. In4.xlsx
- Table S7 The top 20 KEGG enrichment pathways of DEGs in L4 vs. In4.xlsx
- Table S8 Statistics of the numbers of transcription factor.xlsx
- Table S9 Statistics of differentially expressed genes encoding transcription factors.xlsx
