# Supplementary material for: Physiological and Transcriptomic Analysis Revealed the Molecular Mechanism of Pinus koraiensis Responses to Light
Source: Int J Mol Sci. 2022 Nov 6;23(21):13608. doi: 10.3390/ijms232113608 (PMC9653891; doi:10.3390/ijms232113608)
Supplement: Supplementary file 1 [file ijms-23-13608-s001.zip › Table S1 ANOVA of multiple traits for P. koraiensis.xlsx]

## Sheet: Sheet1
Supplementary Table S1. ANOVA of multiple traits for P. koraiensis
Traits	SS	df	MS	F
Shoot fresh weight (g)	190.796	2	95.3979	115.56**
Shoot dry weight (g)	35.7142	2	17.8571	22.41**
Root fresh weight (g)	26.5598	2	13.2799	65.44**
Root dry weight (g)	2.60744	2	1.30372	47.19**
IAA (μg/l)	669.815	2	334.908	337.44**
GA (pg/ml)	4962.78	2	2481.39	83.15**
JA (pmol/l)	53975.9	2	26988	226.36**
SA (pmol/l）	19092.6	2	9546.29	88.50**
ABA (μg/l)	5424.82	2	2712.41	173.11**
ZT (ng/l)	1881.52	2	940.761	201.81**
ETH (ng/l)	1475.62	2	737.808	14.55**
BR (ng/l)	392.926	2	196.463	19.41**
Pn (μmol/m2·s)	35.8561	2	17.928	658.47**
Gs (mol/m2·s)	24912.5	2	12456.3	847.37**
Ci (μmol/mol)	2403.33	2	1201.67	36.94**
Tr (mol/m2·s)	4.44484	2	2.22242	757.64**
WUE (μmol/mol)	0.252798	2	0.126399	48.34**
Total Chl content (mg/L)	59.5258	2	29.7629	168.30**
Chl a content (mg/L)	17.4284	2	8.7142	200.28**
Chl b content (mg/L)	12.664	2	6.33198	78.44**
Car content (mg/L)	0.42097	2	0.210485	374.05**
Note: The ** Represents extremely significant differences at p < 0.01.
