# Supplementary material for: Physiological and Transcriptomic Analysis Revealed the Molecular Mechanism of Pinus koraiensis Responses to Light
Source: Int J Mol Sci. 2022 Nov 6;23(21):13608. doi: 10.3390/ijms232113608 (PMC9653891; doi:10.3390/ijms232113608)
Supplement: Supplementary file 1 [file ijms-23-13608-s001.zip › Table S2 Sample sequencing data evaluation statistics.xlsx]

## Sheet: Sheet1
Supplemental Table S2. Sample sequencing data evaluation statistics
Sample	Raw Reads	Clean Reads	Clean Base(G)	Error Rate(%)	Q20(%)	Q30(%)	GC Content(%)
CK-1	71068594	66927370	10.04	0.03	98.35	94.98	45.37
CK-2	42347882	40029618	6	0.03	98.35	94.99	45.93
CK-3	42048688	40913512	6.14	0.03	98.13	94.27	46.03
L4-1	70476738	67049430	10.06	0.03	98.12	94.26	42.97
L4-2	63092194	60191750	9.03	0.03	98.21	94.51	45.67
L4-3	75085034	69303394	10.4	0.03	98.26	94.71	45.32
In4-1	64932842	62182016	9.33	0.03	98.3	94.78	45.25
In4-2	48562808	46363932	6.95	0.03	98.2	94.52	45.69
In4-3	62527380	58343594	8.75	0.03	98.2	94.52	46.05
