# Supplementary material for: Physiological and Transcriptomic Analysis Revealed the Molecular Mechanism of Pinus koraiensis Responses to Light
Source: Int J Mol Sci. 2022 Nov 6;23(21):13608. doi: 10.3390/ijms232113608 (PMC9653891; doi:10.3390/ijms232113608)
Supplement: Supplementary file 1 [file ijms-23-13608-s001.zip › Table S3 BUSCO assessment results.xlsx]

## Sheet: Sheet1
Supplemental Table S3. BUSCO assessment results
Item	Number	Percentage
Complete BUSCOs (C)	1482	0.919
Complete and single-copy BUSCOs (S)	1129	0.7
Complete and duplicated BUSCOs (D)	353	0.219
Fragmented BUSCOs (F)	37	0.023
Missing BUSCOs (M)	95	0.058
Total BUSCO groups searched	1614
