# Supplementary material for: Physiological and Transcriptomic Analysis Revealed the Molecular Mechanism of Pinus koraiensis Responses to Light
Source: Int J Mol Sci. 2022 Nov 6;23(21):13608. doi: 10.3390/ijms232113608 (PMC9653891; doi:10.3390/ijms232113608)
Supplement: Supplementary file 1 [file ijms-23-13608-s001.zip › Table S4 GO functional annotation of differentially expressed genes (DEGs).xlsx]

## Sheet: Sheet1
Supplemental Table S4. GO functional annotation of differentially expressed genes (DEGs)
ID	KEGG	Nr	Swissprot	TrEMBL	KOG	GO	Pfam	TF-Family	TF-Category	TF-Classification
Cluster-27241.101359	K00679 phospholipid:diacylglycerol acyltransferase [EC:2.3.1.158] | (RefSeq) hypothetical protein (A)	hypothetical protein SELMODRAFT_98492 [Selaginella moellendorffii]	GDL75_ARATH RecName: Full=GDSL esterase/lipase At5g08460; EC=3.1.1.-; AltName: Full=Extracellular lipase At5g08460; Flags: Precursor;	D8RPG7_SELML SubName: Full=Uncharacterized protein {ECO:0000313|EMBL:EFJ26256.1};	--	GO:0005576,extracellular region; GO:0016788,hydrolase activity, acting on ester bonds; GO:0016042,lipid catabolic process; GO:0003674,molecular_function; GO:0003824,catalytic activity; GO:0016787,hydrolase activity; GO:0008152,metabolic process; GO:0006629,lipid metabolic process; GO:0008150,biological_process; GO:0009056,catabolic process; GO:0044238,primary metabolic process; GO:0071704,organic…	GDSL-like Lipase/Acylhydrolase	--	--	--
Cluster-27241.34404	--	unknown [Picea sitchensis]	JAL3_ARATH RecName: Full=Jacalin-related lectin 3; AltName: Full=Mannose-binding lectin superfamily protein;	A9NLT2_PICSI SubName: Full=Uncharacterized protein {ECO:0000313|EMBL:ABK21593.1};	--	GO:0030246,carbohydrate binding; GO:0003674,molecular_function; GO:0005488,binding	--	--	--	--
Cluster-27241.45407	K00679 phospholipid:diacylglycerol acyltransferase [EC:2.3.1.158] | (RefSeq) hypothetical protein (A)	unknown [Picea sitchensis]	LTL1_ARATH RecName: Full=GDSL esterase/lipase LTL1; EC=3.1.1.-; AltName: Full=Extracellular lipase LTL1; AltName: Full=Lithium-tolerant lipase 1; Short=AtLTL1; Short=Li-tolerant lipase 1; Flags: Precursor;	A9NQA5_PICSI SubName: Full=Uncharacterized protein {ECO:0000313|EMBL:ABK22816.1};	--	GO:0005576,extracellular region; GO:0016788,hydrolase activity, acting on ester bonds; GO:0042538,hyperosmotic salinity response; GO:0016042,lipid catabolic process; GO:0010226,response to lithium ion; GO:0009751,response to salicylic acid; GO:0003674,molecular_function; GO:0003824,catalytic activity; GO:0016787,hydrolase activity; GO:0006950,response to stress; GO:0006970,response to osmotic str…	GDSL-like Lipase/Acylhydrolase	--	--	--
Cluster-27241.52257	--	--	--	--	--	--	--	--	--	--
Cluster-27241.57790	K22746 anamorsin | (RefSeq) anamorsin homolog (A)	RecName: Full=Anamorsin homolog 1; AltName: Full=Fe-S cluster assembly protein DRE2 homolog 1 ABR16064.1 unknown [Picea sitchensis]	DRE21_PICSI RecName: Full=Anamorsin homolog 1 {ECO:0000255|HAMAP-Rule:MF_03115}; AltName: Full=Fe-S cluster assembly protein DRE2 homolog 1 {ECO:0000255|HAMAP-Rule:MF_03115};	A0A0D6R058_ARACU RecName: Full=Anamorsin homolog {ECO:0000256|HAMAP-Rule:MF_03115}; AltName: Full=Fe-S cluster assembly protein DRE2 homolog {ECO:0000256|HAMAP-Rule:MF_03115};	Protein DRE2, required for cell viability	GO:0005758,mitochondrial intermembrane space; GO:0051537,2 iron, 2 sulfur cluster binding; GO:0046872,metal ion binding; GO:0016226,iron-sulfur cluster assembly; GO:0003674,molecular_function; GO:0005488,binding; GO:0048037,cofactor binding; GO:0051536,iron-sulfur cluster binding; GO:0051540,metal cluster binding; GO:0043167,ion binding; GO:0043169,cation binding; GO:0006790,sulfur compound metab…	Cytokine-induced anti-apoptosis inhibitor 1, Fe-S biogenesis	--	--	--
Cluster-27241.58773	K05277 anthocyanidin synthase [EC:1.14.20.4] | (RefSeq) leucoanthocyanidin dioxygenase (A)	GA2ox10 [Pinus tabuliformis]	LDOX_MALDO RecName: Full=Leucoanthocyanidin dioxygenase; Short=LDOX; Short=Leucocyanidin oxygenase; EC=1.14.11.19 {ECO:0000250|UniProtKB:Q96323}; AltName: Full=Anthocyanidin synthase; AltName: Full=Leucoanthocyanidin hydroxylase;	X5CY97_PINTB SubName: Full=GA2ox10 {ECO:0000313|EMBL:AHW42460.1};	Iron/ascorbate family oxidoreductases	GO:0031418,L-ascorbic acid binding; GO:0050589,leucocyanidin oxygenase activity; GO:0046872,metal ion binding; GO:0009718,anthocyanin-containing compound biosynthetic process; GO:0003674,molecular_function; GO:0030246,carbohydrate binding; GO:0005488,binding; GO:0019842,vitamin binding; GO:0031406,carboxylic acid binding; GO:0036094,small molecule binding; GO:0043167,ion binding; GO:0043168,anion…	2OG-Fe(II) oxygenase superfamily	--	--	--
Cluster-27241.58921	--	putative auxin-repressed protein [Pinus massoniana]	12KD_FRAAN RecName: Full=Auxin-repressed 12.5 kDa protein;	A0A077EMG8_9SPER SubName: Full=Putative auxin-repressed protein {ECO:0000313|EMBL:AIL50244.1};	--	GO:0009734,auxin-activated signaling pathway; GO:0007165,signal transduction; GO:0007154,cell communication; GO:0008150,biological_process; GO:0009719,response to endogenous stimulus; GO:0009725,response to hormone; GO:0009733,response to auxin; GO:0009755,hormone-mediated signaling pathway; GO:0009987,cellular process; GO:0010033,response to organic substance; GO:0023052,signaling; GO:0070887,ce…	Dormancy/auxin associated protein	--	--	--
Cluster-27241.60291	K22588 acetylserotonin O-methyltransferase, plant [EC:2.1.1.4] | (RefSeq) hypothetical protein (A)	pinosylvin O-methyltransferase 2-4 [Pinus sylvestris]	COMT1_MEDSA RecName: Full=Caffeic acid 3-O-methyltransferase; Short=CAOMT; Short=COMT; EC=2.1.1.68; AltName: Full=S-adenosysl-L-methionine:caffeic acid 3-O-methyltransferase;	A0A1S6WNF2_PINSY SubName: Full=Pinosylvin O-methyltransferase 2-5 {ECO:0000313|EMBL:AQX17829.1};	Hydroxyindole-O-methyltransferase and related SAM-dependent methyltransferases	GO:0047763,caffeate O-methyltransferase activity; GO:0046983,protein dimerization activity; GO:0009809,lignin biosynthetic process; GO:0003674,molecular_function; GO:0003824,catalytic activity; GO:0008168,methyltransferase activity; GO:0008171,O-methyltransferase activity; GO:0016740,transferase activity; GO:0016741,transferase activity, transferring one-carbon groups; GO:0005515,protein binding;…	O-methyltransferase domain	--	--	--
Cluster-27241.61127	--	--	--	--	--	--	--	--	--	--
Cluster-27241.62777	--	unknown [Picea sitchensis]	EULS3_ARATH RecName: Full=Ricin B-like lectin EULS3 {ECO:0000305}; AltName: Full=Euonymus lectin S3 {ECO:0000305}; Short=AtEULS3 {ECO:0000303|PubMed:21945438};	A9NRP6_PICSI SubName: Full=Uncharacterized protein {ECO:0000313|EMBL:ABK23307.1};	--	GO:0005737,cytoplasm; GO:0005634,nucleus; GO:0030246,carbohydrate binding; GO:0042742,defense response to bacterium; GO:0090332,stomatal closure; GO:0003674,molecular_function; GO:0005488,binding; GO:0006952,defense response; GO:0006950,response to stress; GO:0008150,biological_process; GO:0009605,response to external stimulus; GO:0009607,response to biotic stimulus; GO:0051707,response to other …	Ricin-type beta-trefoil lectin domain-like	--	--	--
Cluster-27241.63433	K05277 anthocyanidin synthase [EC:1.14.20.4] | (RefSeq) leucoanthocyanidin dioxygenase (A)	GA2ox10 [Pinus tabuliformis]	LDOX_PETHY RecName: Full=Leucoanthocyanidin dioxygenase; Short=LDOX; Short=Leucocyanidin oxygenase; EC=1.14.11.19 {ECO:0000250|UniProtKB:Q96323}; AltName: Full=Leucoanthocyanidin hydroxylase;	X5CY97_PINTB SubName: Full=GA2ox10 {ECO:0000313|EMBL:AHW42460.1};	Iron/ascorbate family oxidoreductases	GO:0031418,L-ascorbic acid binding; GO:0050589,leucocyanidin oxygenase activity; GO:0046872,metal ion binding; GO:0009718,anthocyanin-containing compound biosynthetic process; GO:0003674,molecular_function; GO:0030246,carbohydrate binding; GO:0005488,binding; GO:0019842,vitamin binding; GO:0031406,carboxylic acid binding; GO:0036094,small molecule binding; GO:0043167,ion binding; GO:0043168,anion…	2OG-Fe(II) oxygenase superfamily	--	--	--
Cluster-27241.63523	K15397 3-ketoacyl-CoA synthase [EC:2.3.1.199] | (RefSeq) 3-ketoacyl-CoA synthase 10 (A)	unknown [Picea sitchensis]	KCS10_ARATH RecName: Full=3-ketoacyl-CoA synthase 10 {ECO:0000303|PubMed:18465198}; Short=KCS-10 {ECO:0000303|PubMed:18465198}; EC=2.3.1.199 {ECO:0000305}; AltName: Full=Protein FIDDLEHEAD {ECO:0000303|PubMed:10559443}; AltName: Full=Very long-chain fatty acid condensing enzyme 10 {ECO:0000303|PubMed:18465198}; Short=VLCFA condensing enzyme 10 {ECO:0000303|PubMed:18465198};	A9NVH1_PICSI RecName: Full=3-ketoacyl-CoA synthase {ECO:0000256|PIRNR:PIRNR036417}; EC=2.3.1.- {ECO:0000256|PIRNR:PIRNR036417};	--	GO:0005783,endoplasmic reticulum; GO:0005789,endoplasmic reticulum membrane; GO:0016021,integral component of membrane; GO:0016020,membrane; GO:0102336,3-oxo-arachidoyl-CoA synthase activity; GO:0102337,3-oxo-cerotoyl-CoA synthase activity; GO:0102338,3-oxo-lignoceronyl-CoA synthase activity; GO:0102756,very-long-chain 3-ketoacyl-CoA synthase activity; GO:0006633,fatty acid biosynthetic process; …	FAE1/Type III polyketide synthase-like protein	--	--	--
Cluster-27241.64236	--	defensin 4 [Pinus sylvestris]	DEF1_PINSY RecName: Full=Defensin-1; Flags: Precursor;	A0A060IG63_PINSY SubName: Full=Defensin 4 {ECO:0000313|EMBL:AIC35288.1};	--	GO:0005576,extracellular region; GO:0050832,defense response to fungus; GO:0031640,killing of cells of other organism; GO:0006952,defense response; GO:0006950,response to stress; GO:0008150,biological_process; GO:0009605,response to external stimulus; GO:0009607,response to biotic stimulus; GO:0051707,response to other organism; GO:0009620,response to fungus; GO:0043207,response to external bioti…	Gamma-thionin family	--	--	--
Cluster-27241.64495	K13993 HSP20 family protein | (RefSeq) 17.6 kDa class I heat shock protein 2-like (A)	unknown [Picea sitchensis]	HS178_ARATH RecName: Full=17.8 kDa class I heat shock protein; AltName: Full=17.8 kDa heat shock protein; Short=AtHsp17.8;	A9NMH6_PICSI SubName: Full=Uncharacterized protein {ECO:0000313|EMBL:ABK21837.1};	Molecular chaperone (small heat-shock protein Hsp26/Hsp42)	GO:0005737,cytoplasm; GO:0043621,protein self-association; GO:0009408,response to heat; GO:0006979,response to oxidative stress; GO:0005515,protein binding; GO:0003674,molecular_function; GO:0005488,binding; GO:0006950,response to stress; GO:0008150,biological_process; GO:0009266,response to temperature stimulus; GO:0009628,response to abiotic stimulus; GO:0050896,response to stimulus; GO:0005622…	Hsp20/alpha crystallin family	--	--	--
Cluster-27241.64501	K13993 HSP20 family protein | (RefSeq) 17.6 kDa class I heat shock protein 2-like (A)	unknown [Picea sitchensis]	HS178_ARATH RecName: Full=17.8 kDa class I heat shock protein; AltName: Full=17.8 kDa heat shock protein; Short=AtHsp17.8;	A9NMH6_PICSI SubName: Full=Uncharacterized protein {ECO:0000313|EMBL:ABK21837.1};	Molecular chaperone (small heat-shock protein Hsp26/Hsp42)	GO:0005737,cytoplasm; GO:0043621,protein self-association; GO:0009408,response to heat; GO:0006979,response to oxidative stress; GO:0005515,protein binding; GO:0003674,molecular_function; GO:0005488,binding; GO:0006950,response to stress; GO:0008150,biological_process; GO:0009266,response to temperature stimulus; GO:0009628,response to abiotic stimulus; GO:0050896,response to stimulus; GO:0005622…	Hsp20/alpha crystallin family	--	--	--
Cluster-27241.64624	K05277 anthocyanidin synthase [EC:1.14.20.4] | (RefSeq) leucoanthocyanidin dioxygenase (A)	GA2ox10 [Pinus tabuliformis]	LDOX_PETHY RecName: Full=Leucoanthocyanidin dioxygenase; Short=LDOX; Short=Leucocyanidin oxygenase; EC=1.14.11.19 {ECO:0000250|UniProtKB:Q96323}; AltName: Full=Leucoanthocyanidin hydroxylase;	X5CY97_PINTB SubName: Full=GA2ox10 {ECO:0000313|EMBL:AHW42460.1};	Iron/ascorbate family oxidoreductases	GO:0031418,L-ascorbic acid binding; GO:0050589,leucocyanidin oxygenase activity; GO:0046872,metal ion binding; GO:0009718,anthocyanin-containing compound biosynthetic process; GO:0003674,molecular_function; GO:0030246,carbohydrate binding; GO:0005488,binding; GO:0019842,vitamin binding; GO:0031406,carboxylic acid binding; GO:0036094,small molecule binding; GO:0043167,ion binding; GO:0043168,anion…	2OG-Fe(II) oxygenase superfamily	--	--	--
Cluster-27241.64881	--	unknown [Picea sitchensis]	--	A9NQV2_PICSI SubName: Full=Uncharacterized protein {ECO:0000313|EMBL:ABK23013.1};	--	--	SOUL heme-binding protein	--	--	--
Cluster-27241.64949	K03627 putative transcription factor | (RefSeq) multiprotein-bridging factor 1c (A)	unknown [Picea sitchensis]	MBF1C_ARATH RecName: Full=Multiprotein-bridging factor 1c;	A9NNR9_PICSI SubName: Full=Uncharacterized protein {ECO:0000313|EMBL:ABK22280.1};	Transcription factor MBF1	GO:0005737,cytoplasm; GO:0005730,nucleolus; GO:0003700,DNA-binding transcription factor activity; GO:0043565,sequence-specific DNA binding; GO:0003713,transcription coactivator activity; GO:0009873,ethylene-activated signaling pathway; GO:0045893,positive regulation of transcription, DNA-templated; GO:0009737,response to abscisic acid; GO:0009408,response to heat; GO:0009414,response to water dep…	Multiprotein bridging factor 1	MBF1	TR	MBF1
Cluster-27241.65274	--	unknown [Picea sitchensis]	--	A9P087_PICSI SubName: Full=Uncharacterized protein {ECO:0000313|EMBL:ABK26298.1};	--	--	--	--	--	--
Cluster-27241.65467	K12742 isoprene synthase [EC:4.2.3.27] | (RefSeq) tricyclene synthase EBOS, chloroplastic-like (A)	(+)-3-carene synthase [Pinus contorta]	3CAR1_PICAB RecName: Full=Carene synthase, chloroplastic; Short=PaJF67; Short=PaTPS-3car; EC=4.2.3.107; AltName: Full=(+)-car-3-ene synthase; AltName: Full=3-carene cyclase; Flags: Precursor;	R9QMW8_PINCO SubName: Full=(+)-3-carene synthase {ECO:0000313|EMBL:AFU73859.1};	--	GO:0009507,chloroplast; GO:0016829,lyase activity; GO:0000287,magnesium ion binding; GO:0010333,terpene synthase activity; GO:0071395,cellular response to jasmonic acid stimulus; GO:0043693,monoterpene biosynthetic process; GO:0003674,molecular_function; GO:0003824,catalytic activity; GO:0005488,binding; GO:0046872,metal ion binding; GO:0043167,ion binding; GO:0043169,cation binding; GO:0016835,c…	Terpene synthase family, metal binding domain	--	--	--
Cluster-27241.66182	K13083 flavonoid 3',5'-hydroxylase [EC:1.14.14.81] | (RefSeq) flavonoid 3',5'-hydroxylase 2-like (A)	unknown [Picea sitchensis]	C75A3_PETHY RecName: Full=Flavonoid 3',5'-hydroxylase 2; Short=F3'5'H; EC=1.14.13.88; AltName: Full=CYPLXXVA3; AltName: Full=Cytochrome P450 75A3;	A0A0G7ZNZ0_PICGL SubName: Full=Cytochrome P450 CYP75A14v2 {ECO:0000313|EMBL:JAI17649.1};	Cytochrome P450 CYP2 subfamily	GO:0005783,endoplasmic reticulum; GO:0033772,flavonoid 3',5'-hydroxylase activity; GO:0020037,heme binding; GO:0005506,iron ion binding; GO:0009718,anthocyanin-containing compound biosynthetic process; GO:0003674,molecular_function; GO:0003824,catalytic activity; GO:0004497,monooxygenase activity; GO:0016491,oxidoreductase activity; GO:0016705,oxidoreductase activity, acting on paired donors, wit…	Cytochrome P450	--	--	--
Cluster-27241.66410	K13993 HSP20 family protein | (RefSeq) hypothetical protein (A)	Alpha crystallin/Hsp20 domain [Macleaya cordata]	HSP21_HELAN RecName: Full=17.9 kDa class II heat shock protein;	A0A2G5D8V5_AQUCA SubName: Full=Uncharacterized protein {ECO:0000313|EMBL:PIA39955.1};	Molecular chaperone (small heat-shock protein Hsp26/Hsp42)	GO:0005737,cytoplasm; GO:0005622,intracellular; GO:0005575,cellular_component; GO:0005623,cell; GO:0044424,intracellular part; GO:0044464,cell part	Hsp20/alpha crystallin family	--	--	--
Cluster-27241.66595	K00108 choline dehydrogenase [EC:1.1.99.1] | (RefSeq) protein HOTHEAD (A)	hypothetical protein CICLE_v10019427mg [Citrus clementina]	HTH_ARATH RecName: Full=Protein HOTHEAD; AltName: Full=Protein ADHESION OF CALYX EDGES; Flags: Precursor;	V4T0T8_9ROSI SubName: Full=Uncharacterized protein {ECO:0000313|EMBL:ESR53758.1};	Glucose dehydrogenase/choline dehydrogenase/mandelonitrile lyase (GMC oxidoreductase family)	GO:0005576,extracellular region; GO:0050660,flavin adenine dinucleotide binding; GO:0046593,mandelonitrile lyase activity; GO:0016614,oxidoreductase activity, acting on CH-OH group of donors; GO:0007267,cell-cell signaling; GO:0009553,embryo sac development; GO:0010430,fatty acid omega-oxidation; GO:0000166,nucleotide binding; GO:0003674,molecular_function; GO:0005488,binding; GO:0036094,small mo…	GMC oxidoreductase	--	--	--
Cluster-27241.67041	K13993 HSP20 family protein | (RefSeq) 17.1 kDa class II heat shock protein-like (A)	unknown [Picea sitchensis]	HSP21_SOLPE RecName: Full=17.3 kDa class II heat shock protein; AltName: Full=Hsp17.3; AltName: Full=Hsp20.2;	A9NMS0_PICSI SubName: Full=Uncharacterized protein {ECO:0000313|EMBL:ABK21931.1};	Molecular chaperone (small heat-shock protein Hsp26/Hsp42)	GO:0005737,cytoplasm; GO:0005622,intracellular; GO:0005575,cellular_component; GO:0005623,cell; GO:0044424,intracellular part; GO:0044464,cell part	Hsp20/alpha crystallin family	--	--	--
Cluster-27241.68034	K13993 HSP20 family protein | (GenBank) small heat shock protein (A)	small heat-shock protein, partial [Pinus taeda]	HS23C_OXYRB RecName: Full=Small heat shock protein, chloroplastic; Flags: Precursor;	B7ZEP8_PINTA SubName: Full=Small heat-shock protein {ECO:0000313|EMBL:CAM12501.1}; Flags: Fragment;	Molecular chaperone (small heat-shock protein Hsp26/Hsp42)	GO:0009570,chloroplast stroma; GO:0005622,intracellular; GO:0005575,cellular_component; GO:0005623,cell; GO:0005737,cytoplasm; GO:0043231,intracellular membrane-bounded organelle; GO:0009507,chloroplast; GO:0009532,plastid stroma; GO:0009536,plastid; GO:0043226,organelle; GO:0043227,membrane-bounded organelle; GO:0043229,intracellular organelle; GO:0044422,organelle part; GO:0044424,intracellular…	Hsp20/alpha crystallin family	--	--	--
Cluster-27241.69459	K01373 cathepsin F [EC:3.4.22.41] | (RefSeq) probable cysteine protease RD19B (A)	unknown [Picea sitchensis]	RD19A_ARATH RecName: Full=Cysteine protease RD19A {ECO:0000305}; EC=3.4.22.- {ECO:0000305}; AltName: Full=Protein RESPONSIVE TO DEHYDRATION 19 {ECO:0000303|PubMed:8325504}; Short=RD19 {ECO:0000303|PubMed:8325504}; Flags: Precursor;	A9NU42_PICSI SubName: Full=Uncharacterized protein {ECO:0000313|EMBL:ABK24153.1};	Cysteine proteinase Cathepsin F	GO:0005615,extracellular space; GO:0005764,lysosome; GO:0000323,lytic vacuole; GO:0005634,nucleus; GO:0005773,vacuole; GO:0004197,cysteine-type endopeptidase activity; GO:0042742,defense response to bacterium; GO:0051603,proteolysis involved in cellular protein catabolic process; GO:0006970,response to osmotic stress; GO:0009651,response to salt stress; GO:0003674,molecular_function; GO:0003824,c…	Papain family cysteine protease	--	--	--
Cluster-27241.69778	--	unknown [Picea sitchensis]	MT3_PICGL RecName: Full=Metallothionein-like protein EMB30;	A9NK71_PICSI SubName: Full=Uncharacterized protein {ECO:0000313|EMBL:ABK21032.1};	--	GO:0046872,metal ion binding; GO:0003674,molecular_function; GO:0005488,binding; GO:0043167,ion binding; GO:0043169,cation binding	--	--	--	--
Cluster-27241.70189	K04122 ent-kaurene oxidase [EC:1.14.14.86] | (RefSeq) CYP701A16; ent-kaurene oxidase (A)	KO1 [Pinus tabuliformis]	C7016_ORYSJ RecName: Full=Ent-kaurene oxidase 2 {ECO:0000303|PubMed:15075394}; Short=OsKO2 {ECO:0000303|PubMed:15075394}; EC=1.14.13.78 {ECO:0000269|PubMed:22247270, ECO:0000269|PubMed:22487175}; AltName: Full=Cytochrome P450 701A6 {ECO:0000303|PubMed:22247270}; AltName: Full=Ent-kaurene oxidase-like 2 {ECO:0000303|PubMed:15316288}; Short=OsKOL2 {ECO:0000303|PubMed:15316288}; AltName: Full=OsKOS3…	X5CFL5_PINTB SubName: Full=KO1 {ECO:0000313|EMBL:AHW42468.1};	Cytochrome P450 CYP2 subfamily	GO:0009707,chloroplast outer membrane; GO:0005783,endoplasmic reticulum; GO:0016021,integral component of membrane; GO:0052617,ent-kaur-16-en-19-al oxidase activity; GO:0052616,ent-kaur-16-en-19-ol oxidase activity; GO:0052615,ent-kaurene oxidase activity; GO:0020037,heme binding; GO:0005506,iron ion binding; GO:0010241,ent-kaurene oxidation to kaurenoic acid; GO:0009740,gibberellic acid mediated…	Cytochrome P450	--	--	--
Cluster-27241.70269	K00679 phospholipid:diacylglycerol acyltransferase [EC:2.3.1.158] | (RefSeq) hypothetical protein (A)	unknown [Picea sitchensis]	GDL79_ARATH RecName: Full=GDSL esterase/lipase At5g33370; EC=3.1.1.-; AltName: Full=Extracellular lipase At5g33370; Flags: Precursor;	B8LPL3_PICSI SubName: Full=Uncharacterized protein {ECO:0000313|EMBL:ABR17593.1};	--	GO:0005576,extracellular region; GO:0016788,hydrolase activity, acting on ester bonds; GO:0042335,cuticle development; GO:0016042,lipid catabolic process; GO:0003674,molecular_function; GO:0003824,catalytic activity; GO:0016787,hydrolase activity; GO:0007275,multicellular organism development; GO:0008150,biological_process; GO:0032501,multicellular organismal process; GO:0032502,developmental pro…	GDSL-like Lipase/Acylhydrolase	--	--	--
Cluster-27241.71068	K13993 HSP20 family protein | (RefSeq) 17.8 kDa class I heat shock protein-like (A)	unknown [Picea sitchensis]	HS181_ARATH RecName: Full=18.1 kDa class I heat shock protein; AltName: Full=18.1 kDa heat shock protein; Short=AtHsp18.1;	D5ACL4_PICSI SubName: Full=Uncharacterized protein {ECO:0000313|EMBL:ADE77283.1};	Molecular chaperone (small heat-shock protein Hsp26/Hsp42)	GO:0005737,cytoplasm; GO:0010286,heat acclimation; GO:0009408,response to heat; GO:0009644,response to high light intensity; GO:0042542,response to hydrogen peroxide; GO:0006950,response to stress; GO:0008150,biological_process; GO:0009266,response to temperature stimulus; GO:0009628,response to abiotic stimulus; GO:0050896,response to stimulus; GO:0009314,response to radiation; GO:0009416,respon…	Hsp20/alpha crystallin family	--	--	--
Cluster-27241.71091	K03695 ATP-dependent Clp protease ATP-binding subunit ClpB | (RefSeq) LOW QUALITY PROTEIN: chaperone protein ClpB3, chloroplastic-like (A)	unknown [Picea sitchensis]	JAL3_ARATH RecName: Full=Jacalin-related lectin 3; AltName: Full=Mannose-binding lectin superfamily protein;	A9NLT2_PICSI SubName: Full=Uncharacterized protein {ECO:0000313|EMBL:ABK21593.1};	--	GO:0030246,carbohydrate binding; GO:0003674,molecular_function; GO:0005488,binding	Jacalin-like lectin domain	--	--	--
Cluster-27241.71171	--	unknown [Picea sitchensis]	MT2_RICCO RecName: Full=Metallothionein-like protein type 2;	A9NKV4_PICSI SubName: Full=Uncharacterized protein {ECO:0000313|EMBL:ABK21265.1};	--	GO:0046872,metal ion binding; GO:0003674,molecular_function; GO:0005488,binding; GO:0043167,ion binding; GO:0043169,cation binding	--	--	--	--
Cluster-27241.71176	--	unknown [Picea sitchensis]	MT2_RICCO RecName: Full=Metallothionein-like protein type 2;	A9NKV4_PICSI SubName: Full=Uncharacterized protein {ECO:0000313|EMBL:ABK21265.1};	--	GO:0046872,metal ion binding; GO:0003674,molecular_function; GO:0005488,binding; GO:0043167,ion binding; GO:0043169,cation binding	--	--	--	--
Cluster-27241.71199	K05387 glutamate receptor, ionotropic, plant | (RefSeq) LOW QUALITY PROTEIN: glutamate receptor 2.3-like (A)	pathogenesis-related protein 10-3.1 [Pinus monticola]	PR1_ASPOF RecName: Full=Pathogenesis-related protein 1; Short=AOPR1;	Q5YBE9_PINMO SubName: Full=Pathogenesis-related protein 10-3.1 {ECO:0000313|EMBL:AAU00103.1};	--	GO:0005737,cytoplasm; GO:0006952,defense response; GO:0009607,response to biotic stimulus; GO:0006950,response to stress; GO:0008150,biological_process; GO:0050896,response to stimulus; GO:0005622,intracellular; GO:0005575,cellular_component; GO:0005623,cell; GO:0044424,intracellular part; GO:0044464,cell part	Pathogenesis-related protein Bet v I family	--	--	--
Cluster-27241.71548	--	--	--	--	--	--	--	--	--	--
Cluster-27241.71733	K23947 2-oxoglutarate-dependent dioxygenase [EC:1.14.11.-] | (RefSeq) 2-oxoglutarate-dependent dioxygenase DAO (A)	unknown [Picea sitchensis]	DAO_ORYSI RecName: Full=2-oxoglutarate-dependent dioxygenase DAO; EC=1.14.11.-; AltName: Full=Protein DIOXYGENASE FOR AUXIN OXIDATION;	A9NW35_PICSI SubName: Full=Uncharacterized protein {ECO:0000313|EMBL:ABK24846.1};	Iron/ascorbate family oxidoreductases	GO:0051213,dioxygenase activity; GO:0046872,metal ion binding; GO:0009852,auxin catabolic process; GO:0003674,molecular_function; GO:0003824,catalytic activity; GO:0016491,oxidoreductase activity; GO:0005488,binding; GO:0043167,ion binding; GO:0043169,cation binding; GO:0008152,metabolic process; GO:0008150,biological_process; GO:0009056,catabolic process; GO:0009850,auxin metabolic process; GO:0…	2OG-Fe(II) oxygenase superfamily	--	--	--
Cluster-27241.72113	--	unknown [Picea sitchensis]	--	A9P0A3_PICSI SubName: Full=Uncharacterized protein {ECO:0000313|EMBL:ABK26314.1};	--	--	--	--	--	--
Cluster-27241.76452	K07870 mitochondrial Rho GTPase 1 [EC:3.6.5.-] | (RefSeq) uncharacterized protein LOC103958384 (A)	unknown [Picea sitchensis]	BSPA_POPDE RecName: Full=Bark storage protein A; Flags: Precursor;	B8LL97_PICSI SubName: Full=Uncharacterized protein {ECO:0000313|EMBL:ABR16427.1};	--	GO:0003824,catalytic activity; GO:0045735,nutrient reservoir activity; GO:0009116,nucleoside metabolic process; GO:0003674,molecular_function; GO:0008152,metabolic process; GO:0006139,nucleobase-containing compound metabolic process; GO:0006725,cellular aromatic compound metabolic process; GO:0006807,nitrogen compound metabolic process; GO:0008150,biological_process; GO:0009987,cellular process; …	Phosphorylase superfamily	--	--	--
Cluster-27241.77421	--	unknown [Picea sitchensis]	EULS3_ARATH RecName: Full=Ricin B-like lectin EULS3 {ECO:0000305}; AltName: Full=Euonymus lectin S3 {ECO:0000305}; Short=AtEULS3 {ECO:0000303|PubMed:21945438};	A9NRP6_PICSI SubName: Full=Uncharacterized protein {ECO:0000313|EMBL:ABK23307.1};	--	GO:0005737,cytoplasm; GO:0005634,nucleus; GO:0030246,carbohydrate binding; GO:0042742,defense response to bacterium; GO:0090332,stomatal closure; GO:0003674,molecular_function; GO:0005488,binding; GO:0006952,defense response; GO:0006950,response to stress; GO:0008150,biological_process; GO:0009605,response to external stimulus; GO:0009607,response to biotic stimulus; GO:0051707,response to other …	Ricin-type beta-trefoil lectin domain-like	--	--	--
Cluster-27241.69717	K13993 HSP20 family protein | (RefSeq) 17.3 kDa class I heat shock protein (A)	unknown [Picea sitchensis]	HSP11_PEA RecName: Full=18.1 kDa class I heat shock protein; AltName: Full=HSP 18.1;	A9P1C1_PICSI SubName: Full=Uncharacterized protein {ECO:0000313|EMBL:ABK26682.1};	Molecular chaperone (small heat-shock protein Hsp26/Hsp42)	GO:0005737,cytoplasm; GO:0043234,NA; GO:0042802,identical protein binding; GO:0051260,protein homooligomerization; GO:0050821,protein stabilization; GO:0005515,protein binding; GO:0003674,molecular_function; GO:0005488,binding; GO:0008150,biological_process; GO:0009987,cellular process; GO:0022607,cellular component assembly; GO:0016043,cellular component organization; GO:0043933,protein-containi…	Hsp20/alpha crystallin family	--	--	--
Cluster-27241.65514	K02206 cyclin-dependent kinase 2 [EC:2.7.11.22] | (RefSeq) cell division control protein 2 homolog (A)	Protein kinase domain [Macleaya cordata]	PAP14_ARATH RecName: Full=Probable plastid-lipid-associated protein 14, chloroplastic; Short=AtPap14; AltName: Full=Fibrillin-11; AltName: Full=OBP3-responsive protein 1; Flags: Precursor;	A0A200QLH6_9MAGN SubName: Full=Protein kinase domain {ECO:0000313|EMBL:OVA11320.1};	Protein kinase PCTAIRE and related kinases	GO:0009507,chloroplast; GO:0005634,nucleus; GO:0005524,ATP binding; GO:0004693,cyclin-dependent protein serine/threonine kinase activity; GO:0006468,protein phosphorylation; GO:0010468,regulation of gene expression; GO:0007346,regulation of mitotic cell cycle; GO:0000166,nucleotide binding; GO:0003674,molecular_function; GO:0005488,binding; GO:0008144,drug binding; GO:0017076,purine nucleotide bi…	Protein kinase domain	--	--	--
Cluster-27241.55781	--	hypothetical protein 0_2183_02, partial [Pinus taeda]	--	K7NJB4_PINTA SubName: Full=Uncharacterized protein {ECO:0000313|EMBL:AEX11994.1}; Flags: Fragment;	--	--	Domain of unknown function (DUF4763)	--	--	--
Cluster-27241.68315	--	unknown [Picea sitchensis]	--	A9P131_PICSI SubName: Full=Uncharacterized protein {ECO:0000313|EMBL:ABK26592.1};	--	--	Protein of unknown function, DUF538	--	--	--
Cluster-27241.66137	--	RecName: Full=Non-specific lipid-transfer protein; Short=LTP; Flags: Precursor AAA82182.1 nonspecific lipid transfer protein [Pinus taeda]	NLTP_PINTA RecName: Full=Non-specific lipid-transfer protein; Short=LTP; Flags: Precursor;	H9B580_PINSY RecName: Full=Non-specific lipid-transfer protein {ECO:0000256|RuleBase:RU000628};	--	GO:0008289,lipid binding; GO:0006869,lipid transport; GO:0003674,molecular_function; GO:0005488,binding; GO:0006810,transport; GO:0008150,biological_process; GO:0010876,lipid localization; GO:0033036,macromolecule localization; GO:0051179,localization; GO:0051234,establishment of localization; GO:0071702,organic substance transport	Protease inhibitor/seed storage/LTP family	--	--	--
Cluster-27241.78854	--	unknown [Picea sitchensis]	DRL29_ARATH RecName: Full=Probable disease resistance protein At4g33300;	B8LKC3_PICSI SubName: Full=Uncharacterized protein {ECO:0000313|EMBL:ABR16103.1};	--	GO:0048046,apoplast; GO:0043531,ADP binding; GO:0005524,ATP binding; GO:0042742,defense response to bacterium; GO:0000166,nucleotide binding; GO:0003674,molecular_function; GO:0005488,binding; GO:0017076,purine nucleotide binding; GO:0030554,adenyl nucleotide binding; GO:0032553,ribonucleotide binding; GO:0032555,purine ribonucleotide binding; GO:0032559,adenyl ribonucleotide binding; GO:0036094,…	Arabidopsis broad-spectrum mildew resistance protein RPW8	--	--	--
Cluster-27241.67397	K03695 ATP-dependent Clp protease ATP-binding subunit ClpB | (RefSeq) LOW QUALITY PROTEIN: chaperone protein ClpB3, chloroplastic-like (A)	jacalin-related lectin 3 isoform X2 [Amborella trichopoda]	JAL19_ARATH RecName: Full=Jacalin-related lectin 19;	W1P0W1_AMBTC SubName: Full=Uncharacterized protein {ECO:0000313|EMBL:ERN01274.1};	--	GO:0030246,carbohydrate binding; GO:0003674,molecular_function; GO:0005488,binding	Jacalin-like lectin domain	--	--	--
Cluster-27241.75164	K09753 cinnamoyl-CoA reductase [EC:1.2.1.44] | (RefSeq) cinnamoyl-CoA reductase 1-like (A)	unknown [Picea sitchensis]	CCR1_ARATH RecName: Full=Cinnamoyl-CoA reductase 1; Short=AtCCR1; EC=1.2.1.44; AltName: Full=Protein IRREGULAR XYLEM 4;	C0PS01_PICSI SubName: Full=Uncharacterized protein {ECO:0000313|EMBL:ACN40591.1};	Flavonol reductase/cinnamoyl-CoA reductase	GO:0005829,cytosol; GO:0016621,cinnamoyl-CoA reductase activity; GO:0050662,coenzyme binding; GO:0007623,circadian rhythm; GO:0009809,lignin biosynthetic process; GO:0009409,response to cold; GO:0003674,molecular_function; GO:0003824,catalytic activity; GO:0016491,oxidoreductase activity; GO:0016620,oxidoreductase activity, acting on the aldehyde or oxo group of donors, NAD or NADP as acceptor; G…	NAD dependent epimerase/dehydratase family	--	--	--
Cluster-27241.66136	--	RecName: Full=Non-specific lipid-transfer protein; Short=LTP; Flags: Precursor AAA82182.1 nonspecific lipid transfer protein [Pinus taeda]	NLTP_PINTA RecName: Full=Non-specific lipid-transfer protein; Short=LTP; Flags: Precursor;	H9B580_PINSY RecName: Full=Non-specific lipid-transfer protein {ECO:0000256|RuleBase:RU000628};	--	GO:0008289,lipid binding; GO:0006869,lipid transport; GO:0003674,molecular_function; GO:0005488,binding; GO:0006810,transport; GO:0008150,biological_process; GO:0010876,lipid localization; GO:0033036,macromolecule localization; GO:0051179,localization; GO:0051234,establishment of localization; GO:0071702,organic substance transport	Protease inhibitor/seed storage/LTP family	--	--	--
Cluster-27241.68029	K13993 HSP20 family protein | (GenBank) small heat shock protein (A)	small heat-shock protein, partial [Pinus taeda]	HS23C_OXYRB RecName: Full=Small heat shock protein, chloroplastic; Flags: Precursor;	B7ZEP8_PINTA SubName: Full=Small heat-shock protein {ECO:0000313|EMBL:CAM12501.1}; Flags: Fragment;	Molecular chaperone (small heat-shock protein Hsp26/Hsp42)	GO:0009570,chloroplast stroma; GO:0005622,intracellular; GO:0005575,cellular_component; GO:0005623,cell; GO:0005737,cytoplasm; GO:0043231,intracellular membrane-bounded organelle; GO:0009507,chloroplast; GO:0009532,plastid stroma; GO:0009536,plastid; GO:0043226,organelle; GO:0043227,membrane-bounded organelle; GO:0043229,intracellular organelle; GO:0044422,organelle part; GO:0044424,intracellular…	Hsp20/alpha crystallin family	--	--	--
Cluster-27241.71803	K13993 HSP20 family protein | (RefSeq) 17.8 kDa class I heat shock protein-like (A)	HSP [Pinus tabuliformis]	HS181_ARATH RecName: Full=18.1 kDa class I heat shock protein; AltName: Full=18.1 kDa heat shock protein; Short=AtHsp18.1;	A0A0K0M7A4_PINTB SubName: Full=HSP {ECO:0000313|EMBL:AJP06306.1};	Molecular chaperone (small heat-shock protein Hsp26/Hsp42)	GO:0005737,cytoplasm; GO:0010286,heat acclimation; GO:0009408,response to heat; GO:0009644,response to high light intensity; GO:0042542,response to hydrogen peroxide; GO:0006950,response to stress; GO:0008150,biological_process; GO:0009266,response to temperature stimulus; GO:0009628,response to abiotic stimulus; GO:0050896,response to stimulus; GO:0009314,response to radiation; GO:0009416,respon…	Hsp20/alpha crystallin family	--	--	--
Cluster-27241.71894	K09841 xanthoxin dehydrogenase [EC:1.1.1.288] | (RefSeq) xanthoxin dehydrogenase-like (A)	BSU5 [Pinus tabuliformis]	SDR2A_ARATH RecName: Full=Short-chain dehydrogenase reductase 2a; Short=AtSDR2a; EC=1.1.1.-;	A0A0K0M797_PINTB SubName: Full=BSU5 {ECO:0000313|EMBL:AJP06249.1};	Reductases with broad range of substrate specificities	GO:0016491,oxidoreductase activity; GO:0003674,molecular_function; GO:0003824,catalytic activity	Enoyl-(Acyl carrier protein) reductase	--	--	--
Cluster-27241.67038	K13993 HSP20 family protein | (RefSeq) 17.1 kDa class II heat shock protein-like (A)	small heat-shock protein [Picea abies]	HSP21_SOLPE RecName: Full=17.3 kDa class II heat shock protein; AltName: Full=Hsp17.3; AltName: Full=Hsp20.2;	Q8L543_PICAB SubName: Full=Small heat-shock protein {ECO:0000313|EMBL:CAC81958.1};	Molecular chaperone (small heat-shock protein Hsp26/Hsp42)	GO:0005737,cytoplasm; GO:0005622,intracellular; GO:0005575,cellular_component; GO:0005623,cell; GO:0044424,intracellular part; GO:0044464,cell part	Hsp20/alpha crystallin family	--	--	--
Cluster-27241.77225	--	--	--	--	--	--	--	--	--	--
Cluster-27241.68255	K06997 PLP dependent protein | (RefSeq) proline synthase co-transcribed bacterial homolog protein-like (A)	unknown [Picea sitchensis]	--	A9NP32_PICSI RecName: Full=Pyridoxal phosphate homeostasis protein {ECO:0000256|HAMAP-Rule:MF_03225}; Short=PLP homeostasis protein {ECO:0000256|HAMAP-Rule:MF_03225};	Proline synthetase co-transcribed protein	GO:0030170,pyridoxal phosphate binding; GO:0003674,molecular_function; GO:0005488,binding; GO:0008144,drug binding; GO:0019842,vitamin binding; GO:0036094,small molecule binding; GO:0043167,ion binding; GO:0043168,anion binding; GO:0048037,cofactor binding; GO:0050662,coenzyme binding; GO:0070279,vitamin B6 binding; GO:0097159,organic cyclic compound binding; GO:1901363,heterocyclic compound bind…	Alanine racemase, N-terminal domain	--	--	--
Cluster-27241.61594	--	--	--	--	--	--	--	--	--	--
Cluster-27241.31609	K01179 endoglucanase [EC:3.2.1.4] | (RefSeq) endoglucanase 6-like (A)	endoglucanase 6-like [Manihot esculenta]	GUN6_ARATH RecName: Full=Endoglucanase 6; EC=3.2.1.4; AltName: Full=Endo-1,4-beta glucanase 6; Flags: Precursor;	A0A0D6R7H6_ARACU RecName: Full=Endoglucanase {ECO:0000256|RuleBase:RU361166}; EC=3.2.1.4 {ECO:0000256|RuleBase:RU361166};	--	GO:0005576,extracellular region; GO:0030246,carbohydrate binding; GO:0008810,cellulase activity; GO:0071555,cell wall organization; GO:0030245,cellulose catabolic process; GO:0003674,molecular_function; GO:0005488,binding; GO:0003824,catalytic activity; GO:0004553,hydrolase activity, hydrolyzing O-glycosyl compounds; GO:0016787,hydrolase activity; GO:0016798,hydrolase activity, acting on glycosyl…	Glycosyl hydrolase family 9	--	--	--
Cluster-27241.49784	K10781 fatty acyl-ACP thioesterase B [EC:3.1.2.14 3.1.2.21] | (RefSeq) uncharacterized protein LOC113347984 isoform X1 (A)	unknown [Picea sitchensis]	ML423_ARATH RecName: Full=MLP-like protein 423;	A9NMK0_PICSI SubName: Full=Uncharacterized protein {ECO:0000313|EMBL:ABK21861.1};	--	GO:0016020,membrane; GO:0006952,defense response; GO:0009607,response to biotic stimulus; GO:0006950,response to stress; GO:0008150,biological_process; GO:0050896,response to stimulus; GO:0005575,cellular_component	Pathogenesis-related protein Bet v I family	--	--	--
Cluster-27241.65198	K13993 HSP20 family protein | (RefSeq) 17.8 kDa class I heat shock protein-like (A)	HSP [Pinus tabuliformis]	HS181_ARATH RecName: Full=18.1 kDa class I heat shock protein; AltName: Full=18.1 kDa heat shock protein; Short=AtHsp18.1;	A0A0K0M7A4_PINTB SubName: Full=HSP {ECO:0000313|EMBL:AJP06306.1};	Molecular chaperone (small heat-shock protein Hsp26/Hsp42)	GO:0005737,cytoplasm; GO:0010286,heat acclimation; GO:0009408,response to heat; GO:0009644,response to high light intensity; GO:0042542,response to hydrogen peroxide; GO:0006950,response to stress; GO:0008150,biological_process; GO:0009266,response to temperature stimulus; GO:0009628,response to abiotic stimulus; GO:0050896,response to stimulus; GO:0009314,response to radiation; GO:0009416,respon…	Hsp20/alpha crystallin family	--	--	--
Cluster-27241.77741	K03695 ATP-dependent Clp protease ATP-binding subunit ClpB | (RefSeq) LOW QUALITY PROTEIN: chaperone protein ClpB3, chloroplastic-like (A)	PREDICTED: jacalin-related lectin 3 isoform X1 [Phoenix dactylifera]	JAL3_ARATH RecName: Full=Jacalin-related lectin 3; AltName: Full=Mannose-binding lectin superfamily protein;	A0A2H3ZXJ4_PHODC SubName: Full=jacalin-related lectin 3 isoform X1 {ECO:0000313|RefSeq:XP_017700857.1}; SubName: Full=jacalin-related lectin 3 isoform X2 {ECO:0000313|RefSeq:XP_017700858.1};	--	GO:0030246,carbohydrate binding; GO:0003674,molecular_function; GO:0005488,binding	Jacalin-like lectin domain	--	--	--
Cluster-27241.80580	--	--	--	--	--	--	--	--	--	--
Cluster-27241.34213	K19861 benzyl alcohol O-benzoyltransferase [EC:2.3.1.196 2.3.1.232] | (RefSeq) benzyl alcohol O-benzoyltransferase (A)	unknown [Picea sitchensis]	BEBT_TOBAC RecName: Full=Benzyl alcohol O-benzoyltransferase; EC=2.3.1.196; AltName: Full=Benzoyl coenzyme A:benzyl alcohol benzoyl transferase;	B8LLR5_PICSI SubName: Full=Uncharacterized protein {ECO:0000313|EMBL:ABR16595.1};	--	GO:0016747,transferase activity, transferring acyl groups other than amino-acyl groups; GO:0003674,molecular_function; GO:0003824,catalytic activity; GO:0016740,transferase activity; GO:0016746,transferase activity, transferring acyl groups	Transferase family	--	--	--
Cluster-27241.99408	K22588 acetylserotonin O-methyltransferase, plant [EC:2.1.1.4] | (RefSeq) desmethylxanthohumol 6'-O-methyltransferase-like (A)	unknown [Picea sitchensis]	7OMT_PAPSO RecName: Full=(R,S)-reticuline 7-O-methyltransferase {ECO:0000303|PubMed:14675446}; Short=7OMT {ECO:0000303|PubMed:14675446}; EC=2.1.1.291 {ECO:0000269|PubMed:14675446};	B8LQK0_PICSI SubName: Full=Uncharacterized protein {ECO:0000313|EMBL:ABR17930.1};	Hydroxyindole-O-methyltransferase and related SAM-dependent methyltransferases	GO:0102918,(R)-reticuline 7-O-methyltransferase activity; GO:0102917,(S)-reticuline 7-O-methyltransferase activity; GO:0042802,identical protein binding; GO:0008171,O-methyltransferase activity; GO:0046983,protein dimerization activity; GO:0009821,alkaloid biosynthetic process; GO:0003674,molecular_function; GO:0003824,catalytic activity; GO:0008168,methyltransferase activity; GO:0016740,transfer…	O-methyltransferase domain	--	--	--
Cluster-27241.63401	K08235 xyloglucan:xyloglucosyl transferase [EC:2.4.1.207] | (RefSeq) probable xyloglucan endotransglucosylase/hydrolase protein 8 (A)	unknown [Picea sitchensis]	XTH8_ARATH RecName: Full=Probable xyloglucan endotransglucosylase/hydrolase protein 8; Short=At-XTH8; Short=XTH-8; EC=2.4.1.207; Flags: Precursor;	A9P223_PICSI RecName: Full=Xyloglucan endotransglucosylase/hydrolase {ECO:0000256|RuleBase:RU361120}; EC=2.4.1.207 {ECO:0000256|RuleBase:RU361120};	--	GO:0048046,apoplast; GO:0005618,cell wall; GO:0004553,hydrolase activity, hydrolyzing O-glycosyl compounds; GO:0016762,xyloglucan:xyloglucosyl transferase activity; GO:0042546,cell wall biogenesis; GO:0071555,cell wall organization; GO:0010411,xyloglucan metabolic process; GO:0003674,molecular_function; GO:0003824,catalytic activity; GO:0016787,hydrolase activity; GO:0016798,hydrolase activity, a…	Glycosyl hydrolases family 16	--	--	--
Cluster-27241.70193	--	unknown [Picea sitchensis]	NLTP2_LENCU RecName: Full=Non-specific lipid-transfer protein 2; Short=LTP2; Contains: RecName: Full=Non-specific lipid-transfer protein 7; Short=LTP7; Flags: Precursor;	A9NP77_PICSI RecName: Full=Non-specific lipid-transfer protein {ECO:0000256|RuleBase:RU000628};	--	GO:0008289,lipid binding; GO:0006869,lipid transport; GO:0003674,molecular_function; GO:0005488,binding; GO:0006810,transport; GO:0008150,biological_process; GO:0010876,lipid localization; GO:0033036,macromolecule localization; GO:0051179,localization; GO:0051234,establishment of localization; GO:0071702,organic substance transport	Protease inhibitor/seed storage/LTP family	--	--	--
Cluster-27241.62326	--	unknown [Picea sitchensis]	--	A9NSV5_PICSI SubName: Full=Uncharacterized protein {ECO:0000313|EMBL:ABK23716.1};	--	--	--	--	--	--
Cluster-27241.68669	--	--	--	--	--	--	--	--	--	--
Cluster-27241.70829	--	--	--	--	--	--	--	--	--	--
Cluster-27241.65219	K13993 HSP20 family protein | (RefSeq) 17.8 kDa class I heat shock protein-like (A)	HSP [Pinus tabuliformis]	HSP11_DAUCA RecName: Full=17.8 kDa class I heat shock protein; AltName: Full=Clone DCHSP17.7;	A0A0K0M7A4_PINTB SubName: Full=HSP {ECO:0000313|EMBL:AJP06306.1};	Molecular chaperone (small heat-shock protein Hsp26/Hsp42)	GO:0005737,cytoplasm; GO:0005622,intracellular; GO:0005575,cellular_component; GO:0005623,cell; GO:0044424,intracellular part; GO:0044464,cell part	Hsp20/alpha crystallin family	--	--	--
Cluster-27241.77941	--	unknown [Picea sitchensis]	--	A9NU64_PICSI SubName: Full=Uncharacterized protein {ECO:0000313|EMBL:ABK24175.1};	--	--	--	--	--	--
Cluster-27241.80236	K11982 E3 ubiquitin-protein ligase RNF115/126 [EC:2.3.2.27] | (RefSeq) E3 ubiquitin-protein ligase RING1-like (A)	unknown [Picea sitchensis]	RNG1L_ARATH RecName: Full=E3 ubiquitin-protein ligase RING1-like; EC=2.3.2.27; AltName: Full=RING finger protein 1; AltName: Full=RING-type E3 ubiquitin transferase RING1-like {ECO:0000305};	A9NK49_PICSI SubName: Full=Uncharacterized protein {ECO:0000313|EMBL:ABK21010.1};	FOG: Predicted E3 ubiquitin ligase	GO:0046872,metal ion binding; GO:0061630,ubiquitin protein ligase activity; GO:0043161,proteasome-mediated ubiquitin-dependent protein catabolic process; GO:0000209,protein polyubiquitination; GO:0042787,NA; GO:0003674,molecular_function; GO:0005488,binding; GO:0043167,ion binding; GO:0043169,cation binding; GO:0003824,catalytic activity; GO:0004842,ubiquitin-protein transferase activity; GO:0016…	Ring finger domain	--	--	--
Cluster-27241.65252	--	PREDICTED: cysteine proteinase inhibitor 4-like [Raphanus sativus]	CYT1_ACTDE RecName: Full=Cysteine proteinase inhibitor 1 {ECO:0000303|PubMed:14697268}; Short=KCPI1 {ECO:0000303|PubMed:14697268}; AltName: Full=Phytocystatin {ECO:0000312|EMBL:AAR92223.1}; AltName: Allergen=Act d 4; Flags: Precursor;	S8C4C4_9LAMI RecName: Full=Cysteine proteinase inhibitor {ECO:0000256|RuleBase:RU362130};	--	GO:0005576,extracellular region; GO:0004869,cysteine-type endopeptidase inhibitor activity; GO:0006952,defense response; GO:0003674,molecular_function; GO:0004857,enzyme inhibitor activity; GO:0004866,endopeptidase inhibitor activity; GO:0061135,endopeptidase regulator activity; GO:0098772,molecular function regulator; GO:0030414,peptidase inhibitor activity; GO:0030234,enzyme regulator activity;…	Aspartic acid proteinase inhibitor	--	--	--
Cluster-27241.55499	K00430 peroxidase [EC:1.11.1.7] | (RefSeq) peroxidase 12-like (A)	unknown [Picea sitchensis]	PER12_ARATH RecName: Full=Peroxidase 12; Short=Atperox P12; EC=1.11.1.7; AltName: Full=ATP4a; AltName: Full=PRXR6; Flags: Precursor;	A9NU81_PICSI RecName: Full=Peroxidase {ECO:0000256|RuleBase:RU362060}; EC=1.11.1.7 {ECO:0000256|RuleBase:RU362060};	--	GO:0005618,cell wall; GO:0005576,extracellular region; GO:0016020,membrane; GO:0009505,plant-type cell wall; GO:0009506,plasmodesma; GO:0005773,vacuole; GO:0020037,heme binding; GO:0046872,metal ion binding; GO:0004601,peroxidase activity; GO:0042744,hydrogen peroxide catabolic process; GO:0009664,plant-type cell wall organization; GO:0006979,response to oxidative stress; GO:0003674,molecular_fun…	Peroxidase	--	--	--
Cluster-27241.66276	K04773 protease IV [EC:3.4.21.-] | (GenBank) S49 protease IV family peptidase (A)	oligopeptide transporter 3 [Amborella trichopoda]	OPT3_ARATH RecName: Full=Oligopeptide transporter 3; Short=AtOPT3;	A0A0C9RPV2_9SPER SubName: Full=TSA: Wollemia nobilis Ref_Wollemi_Transcript_4499_2841 transcribed RNA sequence {ECO:0000313|EMBL:JAG88971.1};	Sexual differentiation process protein ISP4	GO:0016021,integral component of membrane; GO:0016020,membrane; GO:0005886,plasma membrane; GO:0009506,plasmodesma; GO:0046915,transition metal ion transmembrane transporter activity; GO:0006875,cellular metal ion homeostasis; GO:0055072,iron ion homeostasis; GO:0007275,multicellular organism development; GO:0015031,protein transport; GO:1990388,xylem-to-phloem iron transport; GO:0003674,molecula…	OPT oligopeptide transporter protein	--	--	--
Cluster-27241.80398	K08695 anthocyanidin reductase [EC:1.3.1.77] | (RefSeq) anthocyanidin reductase ((2S)-flavan-3-ol-forming) (A)	unknown [Picea sitchensis]	ANR_GINBI RecName: Full=Putative anthocyanidin reductase {ECO:0000303|PubMed:16399014}; Short=GbANR {ECO:0000303|PubMed:16399014}; EC=1.3.1.- {ECO:0000250|UniProtKB:Q5FB34};	B8LRT5_PICSI SubName: Full=Uncharacterized protein {ECO:0000313|EMBL:ABR18365.1};	Flavonol reductase/cinnamoyl-CoA reductase	GO:0050662,coenzyme binding; GO:0016491,oxidoreductase activity; GO:0009813,flavonoid biosynthetic process; GO:0003674,molecular_function; GO:0005488,binding; GO:0048037,cofactor binding; GO:0003824,catalytic activity; GO:0008152,metabolic process; GO:0008150,biological_process; GO:0009058,biosynthetic process; GO:0009812,flavonoid metabolic process; GO:0071704,organic substance metabolic process…	NAD dependent epimerase/dehydratase family	--	--	--
Cluster-27241.54427	K21398 natural resistance-associated macrophage protein 2 | (RefSeq) metal transporter Nramp3 (A)	unknown [Picea sitchensis]	NRAM2_ARATH RecName: Full=Metal transporter Nramp2; Short=AtNramp2;	D5AE42_PICSI SubName: Full=Uncharacterized protein {ECO:0000313|EMBL:ADE77811.1};	Mn2+ and Fe2+ transporters of the NRAMP family	GO:0016021,integral component of membrane; GO:0005802,trans-Golgi network; GO:0005384,manganese ion transmembrane transporter activity; GO:0071287,cellular response to manganese ion; GO:0055072,iron ion homeostasis; GO:0071421,manganese ion transmembrane transport; GO:0051512,positive regulation of unidimensional cell growth; GO:0048767,root hair elongation; GO:0010015,root morphogenesis; GO:0003…	Natural resistance-associated macrophage protein	--	--	--
Cluster-27241.68014	K13993 HSP20 family protein | (RefSeq) small heat shock protein, chloroplastic-like (A)	unknown [Picea sitchensis]	HS25P_ARATH RecName: Full=Heat shock protein 21, chloroplastic {ECO:0000303|PubMed:2038305}; AltName: Full=25.3 kDa heat shock protein, chloroplastic; Short=AtHsp25.3; Flags: Precursor;	B8LM88_PICSI SubName: Full=Uncharacterized protein {ECO:0000313|EMBL:ABR16768.1};	Molecular chaperone (small heat-shock protein Hsp26/Hsp42)	GO:0101031,chaperone complex; GO:0042644,chloroplast nucleoid; GO:0043621,protein self-association; GO:0009658,chloroplast organization; GO:0006355,regulation of transcription, DNA-templated; GO:0009408,response to heat; GO:0009644,response to high light intensity; GO:0042542,response to hydrogen peroxide; GO:0009416,response to light stimulus; GO:0006351,transcription, DNA-templated; GO:0005515,…	Hsp20/alpha crystallin family	--	--	--
Cluster-27241.72516	K02734 20S proteasome subunit beta 4 [EC:3.4.25.1] | (RefSeq) 20S proteasome subunit beta 4 (A)	Phosphoglucan, water dikinase, chloroplastic [Auxenochlorella protothecoides]	--	A0A087SLG0_AUXPR SubName: Full=Phosphoglucan, water dikinase, chloroplastic {ECO:0000313|EMBL:KFM26564.1};	--	GO:0016301,kinase activity; GO:2001070,starch binding; GO:0003674,molecular_function; GO:0003824,catalytic activity; GO:0016740,transferase activity; GO:0016772,transferase activity, transferring phosphorus-containing groups; GO:0001871,pattern binding; GO:0030246,carbohydrate binding; GO:0005488,binding; GO:0030247,polysaccharide binding	Starch binding domain	--	--	--
Cluster-27241.94182	K01177 beta-amylase [EC:3.2.1.2] | (RefSeq) beta-amylase 3, chloroplastic (A)	Glycoside hydrolase, catalytic domain-containing protein [Cynara cardunculus var. scolymus]	BAM3_ARATH RecName: Full=Beta-amylase 3, chloroplastic; EC=3.2.1.2; AltName: Full=1,4-alpha-D-glucan maltohydrolase; AltName: Full=Beta-amylase 8; AltName: Full=Chloroplast beta-amylase; Short=CT-BMY; Flags: Precursor;	A0A0C9S133_9SPER RecName: Full=Beta-amylase {ECO:0000256|RuleBase:RU000509}; EC=3.2.1.2 {ECO:0000256|RuleBase:RU000509};	--	GO:0009570,chloroplast stroma; GO:0102229,amylopectin maltohydrolase activity; GO:0016161,beta-amylase activity; GO:0000024,maltose biosynthetic process; GO:0009409,response to cold; GO:0005983,starch catabolic process; GO:0003674,molecular_function; GO:0003824,catalytic activity; GO:0004553,hydrolase activity, hydrolyzing O-glycosyl compounds; GO:0016787,hydrolase activity; GO:0016798,hydrolase …	Glycosyl hydrolase family 14	--	--	--
Cluster-27241.63534	K05277 anthocyanidin synthase [EC:1.14.20.4] | (RefSeq) leucoanthocyanidin dioxygenase (A)	GA2ox10 [Pinus tabuliformis]	LDOX_PETHY RecName: Full=Leucoanthocyanidin dioxygenase; Short=LDOX; Short=Leucocyanidin oxygenase; EC=1.14.11.19 {ECO:0000250|UniProtKB:Q96323}; AltName: Full=Leucoanthocyanidin hydroxylase;	X5CY97_PINTB SubName: Full=GA2ox10 {ECO:0000313|EMBL:AHW42460.1};	Iron/ascorbate family oxidoreductases	GO:0031418,L-ascorbic acid binding; GO:0050589,leucocyanidin oxygenase activity; GO:0046872,metal ion binding; GO:0009718,anthocyanin-containing compound biosynthetic process; GO:0003674,molecular_function; GO:0030246,carbohydrate binding; GO:0005488,binding; GO:0019842,vitamin binding; GO:0031406,carboxylic acid binding; GO:0036094,small molecule binding; GO:0043167,ion binding; GO:0043168,anion…	2OG-Fe(II) oxygenase superfamily	--	--	--
Cluster-27241.81321	K01206 alpha-L-fucosidase [EC:3.2.1.51] | (RefSeq) alpha-L-fucosidase 3 (A)	unknown [Picea sitchensis]	GDL61_ARATH RecName: Full=GDSL esterase/lipase At4g01130; EC=3.1.1.-; AltName: Full=Extracellular lipase At4g01130; Flags: Precursor;	B8LK87_PICSI SubName: Full=Uncharacterized protein {ECO:0000313|EMBL:ABR16067.1};	--	GO:0005576,extracellular region; GO:0016788,hydrolase activity, acting on ester bonds; GO:0016042,lipid catabolic process; GO:0003674,molecular_function; GO:0003824,catalytic activity; GO:0016787,hydrolase activity; GO:0008152,metabolic process; GO:0006629,lipid metabolic process; GO:0008150,biological_process; GO:0009056,catabolic process; GO:0044238,primary metabolic process; GO:0071704,organic…	GDSL-like Lipase/Acylhydrolase	--	--	--
Cluster-27241.62548	K03695 ATP-dependent Clp protease ATP-binding subunit ClpB | (RefSeq) LOW QUALITY PROTEIN: chaperone protein ClpB3, chloroplastic-like (A)	PREDICTED: jacalin-related lectin 3 isoform X1 [Phoenix dactylifera]	JAL3_ARATH RecName: Full=Jacalin-related lectin 3; AltName: Full=Mannose-binding lectin superfamily protein;	A0A2H3ZXJ4_PHODC SubName: Full=jacalin-related lectin 3 isoform X1 {ECO:0000313|RefSeq:XP_017700857.1}; SubName: Full=jacalin-related lectin 3 isoform X2 {ECO:0000313|RefSeq:XP_017700858.1};	--	GO:0030246,carbohydrate binding; GO:0003674,molecular_function; GO:0005488,binding	Jacalin-like lectin domain	--	--	--
Cluster-27241.64004	--	unknown [Picea sitchensis]	--	A9NQV2_PICSI SubName: Full=Uncharacterized protein {ECO:0000313|EMBL:ABK23013.1};	--	--	SOUL heme-binding protein	--	--	--
Cluster-27241.68756	--	--	--	--	--	--	--	--	--	--
Cluster-27241.68031	K13993 HSP20 family protein | (GenBank) small heat shock protein (A)	small heat-shock protein, partial [Pinus taeda]	HS23C_OXYRB RecName: Full=Small heat shock protein, chloroplastic; Flags: Precursor;	B7ZEP8_PINTA SubName: Full=Small heat-shock protein {ECO:0000313|EMBL:CAM12501.1}; Flags: Fragment;	Molecular chaperone (small heat-shock protein Hsp26/Hsp42)	GO:0009570,chloroplast stroma; GO:0005622,intracellular; GO:0005575,cellular_component; GO:0005623,cell; GO:0005737,cytoplasm; GO:0043231,intracellular membrane-bounded organelle; GO:0009507,chloroplast; GO:0009532,plastid stroma; GO:0009536,plastid; GO:0043226,organelle; GO:0043227,membrane-bounded organelle; GO:0043229,intracellular organelle; GO:0044422,organelle part; GO:0044424,intracellular…	Hsp20/alpha crystallin family	--	--	--
Cluster-27241.65518	K00430 peroxidase [EC:1.11.1.7] | (RefSeq) peroxidase 72-like (A)	peroxidase [Picea abies]	PER9_ARATH RecName: Full=Peroxidase 9; Short=Atperox P9; EC=1.11.1.7; AltName: Full=ATP18a; Flags: Precursor;	Q5W5I3_PICAB RecName: Full=Peroxidase {ECO:0000256|RuleBase:RU362060}; EC=1.11.1.7 {ECO:0000256|RuleBase:RU362060};	--	GO:0005576,extracellular region; GO:0020037,heme binding; GO:0046872,metal ion binding; GO:0004601,peroxidase activity; GO:0042744,hydrogen peroxide catabolic process; GO:0006979,response to oxidative stress; GO:0003674,molecular_function; GO:0005488,binding; GO:0046906,tetrapyrrole binding; GO:0048037,cofactor binding; GO:0097159,organic cyclic compound binding; GO:1901363,heterocyclic compound …	Peroxidase	--	--	--
Cluster-27241.31312	K10691 E3 ubiquitin-protein ligase UBR4 [EC:2.3.2.27] | (RefSeq) auxin transport protein BIG (A)	unknown [Picea sitchensis]	GDL34_ARATH RecName: Full=GDSL esterase/lipase At2g04570; EC=3.1.1.-; AltName: Full=Extracellular lipase At2g04570; Flags: Precursor;	A9NYY6_PICSI SubName: Full=Uncharacterized protein {ECO:0000313|EMBL:ABK25847.1};	--	GO:0005576,extracellular region; GO:0016788,hydrolase activity, acting on ester bonds; GO:0016042,lipid catabolic process; GO:0003674,molecular_function; GO:0003824,catalytic activity; GO:0016787,hydrolase activity; GO:0008152,metabolic process; GO:0006629,lipid metabolic process; GO:0008150,biological_process; GO:0009056,catabolic process; GO:0044238,primary metabolic process; GO:0071704,organic…	GDSL-like Lipase/Acylhydrolase	--	--	--
Cluster-27241.32678	K01179 endoglucanase [EC:3.2.1.4] | (RefSeq) endoglucanase 3 (A)	endo-beta-1,4-glucanase [Pinus radiata]	GUN17_ARATH RecName: Full=Endoglucanase 17; EC=3.2.1.4; AltName: Full=Endo-1,4-beta glucanase 17; Flags: Precursor;	O64401_PINRA RecName: Full=Endoglucanase {ECO:0000256|RuleBase:RU361166}; EC=3.2.1.4 {ECO:0000256|RuleBase:RU361166};	--	GO:0005576,extracellular region; GO:0008810,cellulase activity; GO:0071555,cell wall organization; GO:0030245,cellulose catabolic process; GO:0003674,molecular_function; GO:0003824,catalytic activity; GO:0004553,hydrolase activity, hydrolyzing O-glycosyl compounds; GO:0016787,hydrolase activity; GO:0016798,hydrolase activity, acting on glycosyl bonds; GO:0008150,biological_process; GO:0009987,cel…	Glycosyl hydrolase family 9	--	--	--
Cluster-27241.71767	K09753 cinnamoyl-CoA reductase [EC:1.2.1.44] | (RefSeq) cinnamoyl-CoA reductase 1-like isoform X1 (A)	unknown [Picea sitchensis]	CCR1_ARATH RecName: Full=Cinnamoyl-CoA reductase 1; Short=AtCCR1; EC=1.2.1.44; AltName: Full=Protein IRREGULAR XYLEM 4;	A9NL44_PICSI SubName: Full=Uncharacterized protein {ECO:0000313|EMBL:ABK21355.1};	Flavonol reductase/cinnamoyl-CoA reductase	GO:0005829,cytosol; GO:0016621,cinnamoyl-CoA reductase activity; GO:0050662,coenzyme binding; GO:0007623,circadian rhythm; GO:0009809,lignin biosynthetic process; GO:0009409,response to cold; GO:0003674,molecular_function; GO:0003824,catalytic activity; GO:0016491,oxidoreductase activity; GO:0016620,oxidoreductase activity, acting on the aldehyde or oxo group of donors, NAD or NADP as acceptor; G…	NAD dependent epimerase/dehydratase family	--	--	--
Cluster-27241.84246	--	unknown [Picea sitchensis]	--	A9NJW1_PICSI SubName: Full=Uncharacterized protein {ECO:0000313|EMBL:ABK20922.1};	--	--	--	--	--	--
Cluster-27241.71480	K25075 pterocarpan synthase [EC:4.2.1.139] | (RefSeq) hypothetical protein (A)	unknown [Picea sitchensis]	DIR11_ARATH RecName: Full=Dirigent protein 11; Short=AtDIR11; Flags: Precursor;	A6YR04_PICSI RecName: Full=Dirigent protein {ECO:0000256|RuleBase:RU363099};	--	GO:0048046,apoplast; GO:0016853,isomerase activity; GO:0003674,molecular_function; GO:0003824,catalytic activity; GO:0005575,cellular_component; GO:0005576,extracellular region	Dirigent-like protein	--	--	--
Cluster-27241.63657	--	--	--	--	--	--	--	--	--	--
Cluster-27241.66607	--	--	--	--	--	--	--	--	--	--
Cluster-27241.113324	--	--	--	--	--	--	--	--	--	--
Cluster-27241.75783	K05277 anthocyanidin synthase [EC:1.14.20.4] | (RefSeq) leucoanthocyanidin dioxygenase (A)	GA2ox10 [Pinus tabuliformis]	LDOX_PETHY RecName: Full=Leucoanthocyanidin dioxygenase; Short=LDOX; Short=Leucocyanidin oxygenase; EC=1.14.11.19 {ECO:0000250|UniProtKB:Q96323}; AltName: Full=Leucoanthocyanidin hydroxylase;	X5CY97_PINTB SubName: Full=GA2ox10 {ECO:0000313|EMBL:AHW42460.1};	Iron/ascorbate family oxidoreductases	GO:0031418,L-ascorbic acid binding; GO:0050589,leucocyanidin oxygenase activity; GO:0046872,metal ion binding; GO:0009718,anthocyanin-containing compound biosynthetic process; GO:0003674,molecular_function; GO:0030246,carbohydrate binding; GO:0005488,binding; GO:0019842,vitamin binding; GO:0031406,carboxylic acid binding; GO:0036094,small molecule binding; GO:0043167,ion binding; GO:0043168,anion…	2OG-Fe(II) oxygenase superfamily	--	--	--
Cluster-27241.57957	--	--	--	--	--	--	--	--	--	--
Cluster-27241.84232	K17290 oxidoreductase [EC:1.1.1.-] | (RefSeq) Oxidoreductase HTATIP2 (A)	unknown [Picea sitchensis]	ELI_PEA RecName: Full=Early light-induced protein, chloroplastic; Short=ELIP; Flags: Precursor;	A9NUC7_PICSI SubName: Full=Uncharacterized protein {ECO:0000313|EMBL:ABK24238.1};	--	GO:0031969,chloroplast membrane; GO:0016021,integral component of membrane; GO:0005622,intracellular; GO:0005575,cellular_component; GO:0016020,membrane; GO:0005623,cell; GO:0005737,cytoplasm; GO:0043231,intracellular membrane-bounded organelle; GO:0009507,chloroplast; GO:0009526,plastid envelope; GO:0009536,plastid; GO:0009941,chloroplast envelope; GO:0031090,organelle membrane; GO:0031967,organ…	Chlorophyll A-B binding protein	--	--	--
Cluster-27241.71130	--	unknown [Picea sitchensis]	NLTP_PINTA RecName: Full=Non-specific lipid-transfer protein; Short=LTP; Flags: Precursor;	A9NJW4_PICSI SubName: Full=Uncharacterized protein {ECO:0000313|EMBL:ABK20925.1};	--	GO:0008289,lipid binding; GO:0006869,lipid transport; GO:0003674,molecular_function; GO:0005488,binding; GO:0006810,transport; GO:0008150,biological_process; GO:0010876,lipid localization; GO:0033036,macromolecule localization; GO:0051179,localization; GO:0051234,establishment of localization; GO:0071702,organic substance transport	Protease inhibitor/seed storage/LTP family	--	--	--
Cluster-27241.69749	K13066 caffeic acid 3-O-methyltransferase / acetylserotonin O-methyltransferase [EC:2.1.1.68 2.1.1.4] | (RefSeq) caffeic acid 3-O-methyltransferase (A)	unknown [Picea sitchensis]	COMT1_PRUDU RecName: Full=Caffeic acid 3-O-methyltransferase; Short=CAOMT; Short=COMT; EC=2.1.1.68; AltName: Full=S-adenosysl-L-methionine:caffeic acid 3-O-methyltransferase;	A9NLA6_PICSI SubName: Full=Uncharacterized protein {ECO:0000313|EMBL:ABK21417.1};	Hydroxyindole-O-methyltransferase and related SAM-dependent methyltransferases	GO:0047763,caffeate O-methyltransferase activity; GO:0046983,protein dimerization activity; GO:0009809,lignin biosynthetic process; GO:0003674,molecular_function; GO:0003824,catalytic activity; GO:0008168,methyltransferase activity; GO:0008171,O-methyltransferase activity; GO:0016740,transferase activity; GO:0016741,transferase activity, transferring one-carbon groups; GO:0005515,protein binding;…	O-methyltransferase domain	--	--	--
Cluster-27241.65212	K13993 HSP20 family protein | (RefSeq) 18.2 kDa class I heat shock protein (A)	HSP [Pinus tabuliformis]	HS181_ARATH RecName: Full=18.1 kDa class I heat shock protein; AltName: Full=18.1 kDa heat shock protein; Short=AtHsp18.1;	A0A0K0M7A4_PINTB SubName: Full=HSP {ECO:0000313|EMBL:AJP06306.1};	Molecular chaperone (small heat-shock protein Hsp26/Hsp42)	GO:0005737,cytoplasm; GO:0010286,heat acclimation; GO:0009408,response to heat; GO:0009644,response to high light intensity; GO:0042542,response to hydrogen peroxide; GO:0006950,response to stress; GO:0008150,biological_process; GO:0009266,response to temperature stimulus; GO:0009628,response to abiotic stimulus; GO:0050896,response to stimulus; GO:0009314,response to radiation; GO:0009416,respon…	Hsp20/alpha crystallin family	--	--	--
Cluster-27241.70702	K24917 amino acid permease | (RefSeq) amino acid permease 3-like (A)	Amino acid transporter, transmembrane [Corchorus capsularis]	AAP3_ARATH RecName: Full=Amino acid permease 3; AltName: Full=Amino acid transporter AAP3;	A0A0C9RHL1_9SPER SubName: Full=TSA: Wollemia nobilis Ref_Wollemi_Transcript_21777_2041 transcribed RNA sequence {ECO:0000313|EMBL:JAG85956.1};	Amino acid transporters	GO:0016021,integral component of membrane; GO:0031965,nuclear membrane; GO:0005886,plasma membrane; GO:0015171,amino acid transmembrane transporter activity; GO:0015293,symporter activity; GO:0003333,amino acid transmembrane transport; GO:0015802,basic amino acid transport; GO:0003674,molecular_function; GO:0005215,transporter activity; GO:0022857,transmembrane transporter activity; GO:0005342,or…	Transmembrane amino acid transporter protein	--	--	--
Cluster-27241.71279	K13993 HSP20 family protein | (RefSeq) 17.8 kDa class I heat shock protein-like (A)	unknown [Picea sitchensis]	HSP12_DAUCA RecName: Full=18.0 kDa class I heat shock protein; AltName: Full=Clone DCHSP17.9;	A9NTL9_PICSI SubName: Full=Uncharacterized protein {ECO:0000313|EMBL:ABK23980.1};	Molecular chaperone (small heat-shock protein Hsp26/Hsp42)	GO:0005737,cytoplasm; GO:0005622,intracellular; GO:0005575,cellular_component; GO:0005623,cell; GO:0044424,intracellular part; GO:0044464,cell part	Hsp20/alpha crystallin family	--	--	--
Cluster-27241.67968	--	unknown [Picea sitchensis]	--	A9NKS2_PICSI SubName: Full=Uncharacterized protein {ECO:0000313|EMBL:ABK21233.1};	--	--	--	--	--	--
Cluster-27241.72767	--	unknown [Picea sitchensis]	--	B8LRG4_PICSI SubName: Full=Uncharacterized protein {ECO:0000313|EMBL:ABR18244.1};	--	--	Cotton fibre expressed protein	--	--	--
Cluster-27241.107288	--	RecName: Full=CASP-like protein 1U1; Short=PsCASPL1U1 [Picea sitchensis]	CSPL5_PICSI RecName: Full=CASP-like protein 1U1; Short=PsCASPL1U1;	A0A0C9S889_9SPER RecName: Full=CASP-like protein {ECO:0000256|RuleBase:RU361233};	--	GO:0016021,integral component of membrane; GO:0005886,plasma membrane; GO:0005575,cellular_component; GO:0016020,membrane; GO:0031224,intrinsic component of membrane; GO:0044425,membrane part; GO:0005623,cell; GO:0044464,cell part; GO:0071944,cell periphery	Domain of unknown function (DUF588)	--	--	--
Cluster-27241.69810	--	unknown [Picea sitchensis]	MT3_PICGL RecName: Full=Metallothionein-like protein EMB30;	D5A8X0_PICSI SubName: Full=Uncharacterized protein {ECO:0000313|EMBL:ADE75989.1};	--	GO:0046872,metal ion binding; GO:0003674,molecular_function; GO:0005488,binding; GO:0043167,ion binding; GO:0043169,cation binding	Plant transcription factor NOZZLE	--	--	--
Cluster-27241.58996	--	Asp/Glu/hydantoin racemase [Macleaya cordata]	--	A0A0C9RQ22_9SPER SubName: Full=TSA: Wollemia nobilis Ref_Wollemi_Transcript_4047_2009 transcribed RNA sequence {ECO:0000313|EMBL:JAG89086.1};	--	GO:0016021,integral component of membrane; GO:0036361,racemase activity, acting on amino acids and derivatives; GO:0006520,cellular amino acid metabolic process; GO:0003674,molecular_function; GO:0003824,catalytic activity; GO:0016853,isomerase activity; GO:0016854,racemase and epimerase activity; GO:0016855,racemase and epimerase activity, acting on amino acids and derivatives; GO:0008152,metabo…	Asp/Glu/Hydantoin racemase	--	--	--
Cluster-27241.71820	K13993 HSP20 family protein | (RefSeq) 18.2 kDa class I heat shock protein-like (A)	unknown [Picea sitchensis]	HSP11_SOLLC RecName: Full=17.8 kDa class I heat shock protein;	A9NL13_PICSI SubName: Full=Uncharacterized protein {ECO:0000313|EMBL:ABK21324.1};	Molecular chaperone (small heat-shock protein Hsp26/Hsp42)	GO:0005737,cytoplasm; GO:0005622,intracellular; GO:0005575,cellular_component; GO:0005623,cell; GO:0044424,intracellular part; GO:0044464,cell part	Hsp20/alpha crystallin family	--	--	--
Cluster-27241.64310	K22746 anamorsin | (RefSeq) anamorsin homolog 2 (A)	RecName: Full=Anamorsin homolog 1; AltName: Full=Fe-S cluster assembly protein DRE2 homolog 1 ABR16064.1 unknown [Picea sitchensis]	DRE21_PICSI RecName: Full=Anamorsin homolog 1 {ECO:0000255|HAMAP-Rule:MF_03115}; AltName: Full=Fe-S cluster assembly protein DRE2 homolog 1 {ECO:0000255|HAMAP-Rule:MF_03115};	A0A0D6R058_ARACU RecName: Full=Anamorsin homolog {ECO:0000256|HAMAP-Rule:MF_03115}; AltName: Full=Fe-S cluster assembly protein DRE2 homolog {ECO:0000256|HAMAP-Rule:MF_03115};	--	GO:0005758,mitochondrial intermembrane space; GO:0051537,2 iron, 2 sulfur cluster binding; GO:0046872,metal ion binding; GO:0016226,iron-sulfur cluster assembly; GO:0003674,molecular_function; GO:0005488,binding; GO:0048037,cofactor binding; GO:0051536,iron-sulfur cluster binding; GO:0051540,metal cluster binding; GO:0043167,ion binding; GO:0043169,cation binding; GO:0006790,sulfur compound metab…	Methyltransferase domain	--	--	--
Cluster-27241.63557	--	--	--	--	--	--	--	--	--	--
Cluster-27241.68676	K14709 solute carrier family 39 (zinc transporter), member 1/2/3 | (RefSeq) zinc transporter 11 (A)	unknown [Picea sitchensis]	ZIP11_ARATH RecName: Full=Zinc transporter 11; AltName: Full=ZRT/IRT-like protein 11; Flags: Precursor;	A9NZA5_PICSI SubName: Full=Uncharacterized protein {ECO:0000313|EMBL:ABK25966.1};	Fe2+/Zn2+ regulated transporter	GO:0016021,integral component of membrane; GO:0016020,membrane; GO:0005886,plasma membrane; GO:0005385,zinc ion transmembrane transporter activity; GO:0071577,zinc ion transmembrane transport; GO:0003674,molecular_function; GO:0046873,metal ion transmembrane transporter activity; GO:0005215,transporter activity; GO:0022857,transmembrane transporter activity; GO:0008324,cation transmembrane transp…	ZIP Zinc transporter	--	--	--
Cluster-27241.65293	K13899 cystatin-C | (RefSeq) cysteine proteinase inhibitor 5-like (A)	PREDICTED: multicystatin-like, partial [Citrus sinensis]	CYT1_ACTDE RecName: Full=Cysteine proteinase inhibitor 1 {ECO:0000303|PubMed:14697268}; Short=KCPI1 {ECO:0000303|PubMed:14697268}; AltName: Full=Phytocystatin {ECO:0000312|EMBL:AAR92223.1}; AltName: Allergen=Act d 4; Flags: Precursor;	A0A2C9VD96_MANES RecName: Full=Cysteine proteinase inhibitor {ECO:0000256|RuleBase:RU362130};	--	GO:0005576,extracellular region; GO:0004869,cysteine-type endopeptidase inhibitor activity; GO:0006952,defense response; GO:0003674,molecular_function; GO:0004857,enzyme inhibitor activity; GO:0004866,endopeptidase inhibitor activity; GO:0061135,endopeptidase regulator activity; GO:0098772,molecular function regulator; GO:0030414,peptidase inhibitor activity; GO:0030234,enzyme regulator activity;…	Aspartic acid proteinase inhibitor	--	--	--
Cluster-27241.79219	--	unknown [Picea sitchensis]	--	A9P083_PICSI SubName: Full=Uncharacterized protein {ECO:0000313|EMBL:ABK26294.1};	--	--	--	--	--	--
Cluster-27241.59550	--	unknown [Picea sitchensis]	--	A9NS50_PICSI SubName: Full=Uncharacterized protein {ECO:0000313|EMBL:ABK23461.1};	--	--	--	--	--	--
Cluster-27241.63503	--	--	--	--	--	--	--	--	--	--
Cluster-27241.88338	--	unknown [Picea sitchensis]	--	D5A9S3_PICSI SubName: Full=Uncharacterized protein {ECO:0000313|EMBL:ADE76292.1};	--	GO:0016787,hydrolase activity; GO:0006629,lipid metabolic process; GO:0003674,molecular_function; GO:0003824,catalytic activity; GO:0008152,metabolic process; GO:0008150,biological_process; GO:0044238,primary metabolic process; GO:0071704,organic substance metabolic process	--	--	--	--
Cluster-27241.65942	K01580 glutamate decarboxylase [EC:4.1.1.15] | (RefSeq) GAD2; glutamate decarboxylase isoform2 (A)	unknown [Picea sitchensis]	DCE_PETHY RecName: Full=Glutamate decarboxylase; Short=GAD; EC=4.1.1.15;	C0PT69_PICSI RecName: Full=Glutamate decarboxylase {ECO:0000256|RuleBase:RU361171}; EC=4.1.1.15 {ECO:0000256|RuleBase:RU361171};	Glutamate decarboxylase/sphingosine phosphate lyase	GO:0005516,calmodulin binding; GO:0004351,glutamate decarboxylase activity; GO:0030170,pyridoxal phosphate binding; GO:0006536,glutamate metabolic process; GO:0005515,protein binding; GO:0003674,molecular_function; GO:0005488,binding; GO:0003824,catalytic activity; GO:0016829,lyase activity; GO:0016830,carbon-carbon lyase activity; GO:0016831,carboxy-lyase activity; GO:0008144,drug binding; GO:00…	Pyridoxal-dependent decarboxylase conserved domain	--	--	--
Cluster-27241.68529	--	--	--	--	--	--	--	--	--	--
Cluster-27241.70826	--	--	--	--	--	--	--	--	--	--
Cluster-27241.62349	--	unknown [Picea sitchensis]	GL814_ORYSJ RecName: Full=Germin-like protein 8-14; AltName: Full=Germin-like protein 1; AltName: Full=Germin-like protein 5; Short=OsGER5; Flags: Precursor;	A9NQL9_PICSI SubName: Full=Uncharacterized protein {ECO:0000313|EMBL:ABK22930.1};	--	GO:0048046,apoplast; GO:0005618,cell wall; GO:0031012,extracellular matrix; GO:0030145,manganese ion binding; GO:0045735,nutrient reservoir activity; GO:0003674,molecular_function; GO:0005488,binding; GO:0046872,metal ion binding; GO:0043167,ion binding; GO:0043169,cation binding; GO:0046914,transition metal ion binding; GO:0005575,cellular_component; GO:0005576,extracellular region; GO:0005623,c…	Cupin	--	--	--
Cluster-27241.73786	K01513 ectonucleotide pyrophosphatase/phosphodiesterase family member 1/3 [EC:3.1.4.1 3.6.1.9] | (RefSeq) uncharacterized protein LOC109769794 (A)	unknown [Picea sitchensis]	--	A9NXT8_PICSI SubName: Full=Uncharacterized protein {ECO:0000313|EMBL:ABK25449.1};	--	--	Plant protein 1589 of unknown function (A_thal_3526)	--	--	--
Cluster-27241.71162	K16290 xylem cysteine proteinase [EC:3.4.22.-] | (RefSeq) cysteine protease XCP1 (A)	PREDICTED: cysteine protease XCP1 [Elaeis guineensis]	XCP2_ARATH RecName: Full=Cysteine protease XCP2 {ECO:0000305}; EC=3.4.22.-; AltName: Full=Xylem cysteine peptidase 2 {ECO:0000303|PubMed:10889267}; Short=AtXCP2 {ECO:0000303|PubMed:10889267}; Flags: Precursor;	W1PV31_AMBTC SubName: Full=Uncharacterized protein {ECO:0000313|EMBL:ERN11571.1};	Cysteine proteinase Cathepsin L	GO:0005618,cell wall; GO:0005615,extracellular space; GO:0005764,lysosome; GO:0005886,plasma membrane; GO:0004197,cysteine-type endopeptidase activity; GO:0042742,defense response to bacterium; GO:0010623,programmed cell death involved in cell development; GO:0051603,proteolysis involved in cellular protein catabolic process; GO:0003674,molecular_function; GO:0003824,catalytic activity; GO:000417…	Papain family cysteine protease	--	--	--
Cluster-27241.65225	K09841 xanthoxin dehydrogenase [EC:1.1.1.288] | (RefSeq) xanthoxin dehydrogenase-like (A)	BSU5 [Pinus tabuliformis]	SDR2A_ARATH RecName: Full=Short-chain dehydrogenase reductase 2a; Short=AtSDR2a; EC=1.1.1.-;	A0A0K0M797_PINTB SubName: Full=BSU5 {ECO:0000313|EMBL:AJP06249.1};	Reductases with broad range of substrate specificities	GO:0016491,oxidoreductase activity; GO:0003674,molecular_function; GO:0003824,catalytic activity	Enoyl-(Acyl carrier protein) reductase	--	--	--
Cluster-27241.71774	K00660 chalcone synthase [EC:2.3.1.74] | (RefSeq) chalcone synthase 1-like (A)	chalcone synthase [Pinus pinaster]	CHS7_PICMA RecName: Full=Chalcone synthase 7; EC=2.3.1.74; AltName: Full=Naregenin-chalcone synthase 7;	Q7XJC5_PINPS SubName: Full=Chalcone synthase {ECO:0000313|EMBL:AAP85249.1};	--	GO:0016210,naringenin-chalcone synthase activity; GO:0009813,flavonoid biosynthetic process; GO:0003674,molecular_function; GO:0003824,catalytic activity; GO:0016740,transferase activity; GO:0016746,transferase activity, transferring acyl groups; GO:0016747,transferase activity, transferring acyl groups other than amino-acyl groups; GO:0008152,metabolic process; GO:0008150,biological_process; GO:…	Chalcone and stilbene synthases, N-terminal domain	--	--	--
Cluster-27241.62747	K00547 homocysteine S-methyltransferase [EC:2.1.1.10] | (RefSeq) homocysteine S-methyltransferase 2-like (A)	unknown [Picea sitchensis]	HMT2_ARATH RecName: Full=Homocysteine S-methyltransferase 2; EC=2.1.1.10; AltName: Full=S-methylmethionine:homocysteine methyltransferase 2; Short=AtHMT-2; Short=SMM:Hcy S-methyltransferase 2;	C0PRQ1_PICSI SubName: Full=Uncharacterized protein {ECO:0000313|EMBL:ACN40491.1};	Homocysteine S-methyltransferase	GO:0005737,cytoplasm; GO:0047150,betaine-homocysteine S-methyltransferase activity; GO:0008898,S-adenosylmethionine-homocysteine S-methyltransferase activity; GO:0008270,zinc ion binding; GO:0009086,methionine biosynthetic process; GO:0033528,S-methylmethionine cycle; GO:0003674,molecular_function; GO:0003824,catalytic activity; GO:0008168,methyltransferase activity; GO:0008172,S-methyltransferas…	Homocysteine S-methyltransferase	--	--	--
Cluster-27241.73207	--	--	--	--	--	--	--	--	--	--
Cluster-27241.80355	--	unknown [Picea sitchensis]	--	A9P198_PICSI SubName: Full=Uncharacterized protein {ECO:0000313|EMBL:ABK26659.1};	--	--	Gamma-glutamyl cyclotransferase, AIG2-like	--	--	--
Cluster-27241.77745	--	hypothetical protein AXG93_4448s1050 [Marchantia polymorpha subsp. ruderalis]	PMIR1_ARATH RecName: Full=Protein PLASTID MOVEMENT IMPAIRED 1-RELATED 1 {ECO:0000303|PubMed:26324877};	A0A176VD03_MARPO SubName: Full=Uncharacterized protein {ECO:0000313|EMBL:OAE18670.1};	--	GO:0005737,cytoplasm; GO:0030048,actin filament-based movement; GO:0009903,chloroplast avoidance movement; GO:0009902,chloroplast relocation; GO:0031022,nuclear migration along microfilament; GO:0009637,response to blue light; GO:0006928,movement of cell or subcellular component; GO:0008150,biological_process; GO:0009987,cellular process; GO:0030029,actin filament-based process; GO:0006996,organe…	N-terminal C2 in EEIG1 and EHBP1 proteins	--	--	--
Cluster-27241.76902	--	hypothetical protein AXG93_4448s1050 [Marchantia polymorpha subsp. ruderalis]	PMIR1_ARATH RecName: Full=Protein PLASTID MOVEMENT IMPAIRED 1-RELATED 1 {ECO:0000303|PubMed:26324877};	A0A176VD03_MARPO SubName: Full=Uncharacterized protein {ECO:0000313|EMBL:OAE18670.1};	--	GO:0005737,cytoplasm; GO:0030048,actin filament-based movement; GO:0009903,chloroplast avoidance movement; GO:0009902,chloroplast relocation; GO:0031022,nuclear migration along microfilament; GO:0009637,response to blue light; GO:0006928,movement of cell or subcellular component; GO:0008150,biological_process; GO:0009987,cellular process; GO:0030029,actin filament-based process; GO:0006996,organe…	N-terminal C2 in EEIG1 and EHBP1 proteins	--	--	--
Cluster-27241.69012	K05359 arogenate/prephenate dehydratase [EC:4.2.1.91 4.2.1.51] | (RefSeq) arogenate dehydratase/prephenate dehydratase 6, chloroplastic (A)	arogenate dehydratase [Pinus pinaster]	AROD6_ARATH RecName: Full=Arogenate dehydratase/prephenate dehydratase 6, chloroplastic; Short=AtADT6; Short=AtPDT6; EC=4.2.1.51; EC=4.2.1.91; Flags: Precursor;	A0A1I9WKA4_PINPS SubName: Full=Arogenate dehydratase {ECO:0000313|EMBL:APA32586.1};	Prephenate dehydratase	GO:0009507,chloroplast; GO:0009570,chloroplast stroma; GO:0047769,arogenate dehydratase activity; GO:0009094,L-phenylalanine biosynthetic process; GO:0003674,molecular_function; GO:0003824,catalytic activity; GO:0016829,lyase activity; GO:0016835,carbon-oxygen lyase activity; GO:0016836,hydro-lyase activity; GO:0008152,metabolic process; GO:0006082,organic acid metabolic process; GO:0006520,cellu…	Prephenate dehydratase	--	--	--
Cluster-27241.55623	--	unknown [Picea sitchensis]	USPAL_ARATH RecName: Full=Universal stress protein A-like protein;	A9NR45_PICSI SubName: Full=Uncharacterized protein {ECO:0000313|EMBL:ABK23106.1};	--	GO:0005886,plasma membrane; GO:0016208,AMP binding; GO:0006950,response to stress; GO:0000166,nucleotide binding; GO:0003674,molecular_function; GO:0005488,binding; GO:0008144,drug binding; GO:0017076,purine nucleotide binding; GO:0030554,adenyl nucleotide binding; GO:0032553,ribonucleotide binding; GO:0032555,purine ribonucleotide binding; GO:0032559,adenyl ribonucleotide binding; GO:0036094,sma…	Universal stress protein family	--	--	--
Cluster-27241.68179	K01070 S-formylglutathione hydrolase [EC:3.1.2.12] | (RefSeq) S-formylglutathione hydrolase isoform X1 (A)	unknown [Picea sitchensis]	SFGH_ARATH RecName: Full=S-formylglutathione hydrolase; Short=AtSFGH; EC=3.1.2.12; AltName: Full=Esterase D;	A9NNG6_PICSI RecName: Full=S-formylglutathione hydrolase {ECO:0000256|RuleBase:RU363068}; EC=3.1.2.12 {ECO:0000256|RuleBase:RU363068};	Esterase D	GO:0048046,apoplast; GO:0052689,carboxylic ester hydrolase activity; GO:0018738,S-formylglutathione hydrolase activity; GO:0046294,formaldehyde catabolic process; GO:0046686,response to cadmium ion; GO:0003674,molecular_function; GO:0003824,catalytic activity; GO:0016787,hydrolase activity; GO:0016788,hydrolase activity, acting on ester bonds; GO:0016790,thiolester hydrolase activity; GO:0008152,…	Putative esterase	--	--	--
Cluster-27241.78334	--	--	--	--	--	--	--	--	--	--
Cluster-27241.89569	K15402 fatty acid omega-hydroxylase [EC:1.14.-.-] | (RefSeq) cytochrome P450 86B1-like (A)	PREDICTED: cytochrome P450 86B1-like [Nicotiana tabacum]	C86B1_ARATH RecName: Full=Cytochrome P450 86B1; EC=1.14.-.-;	A0A0G7ZP22_PICGL SubName: Full=Cytochrome P450 CYP86L4 {ECO:0000313|EMBL:JAI17687.1};	Cytochrome P450 CYP4/CYP19/CYP26 subfamilies	GO:0005783,endoplasmic reticulum; GO:0005789,endoplasmic reticulum membrane; GO:0016021,integral component of membrane; GO:0020037,heme binding; GO:0005506,iron ion binding; GO:0004497,monooxygenase activity; GO:0016705,oxidoreductase activity, acting on paired donors, with incorporation or reduction of molecular oxygen; GO:0071555,cell wall organization; GO:0010345,suberin biosynthetic process; …	Cytochrome P450	--	--	--
Cluster-27241.43277	K00430 peroxidase [EC:1.11.1.7] | (RefSeq) peroxidase 42 (A)	unknown [Picea sitchensis]	PER42_ARATH RecName: Full=Peroxidase 42; Short=Atperox P42; EC=1.11.1.7; AltName: Full=ATP1a/ATP1b; AltName: Full=PRXR1; Flags: Precursor;	A9NNP1_PICSI RecName: Full=Peroxidase {ECO:0000256|RuleBase:RU362060}; EC=1.11.1.7 {ECO:0000256|RuleBase:RU362060};	--	GO:0005576,extracellular region; GO:0009505,plant-type cell wall; GO:0009506,plasmodesma; GO:0020037,heme binding; GO:0046872,metal ion binding; GO:0004601,peroxidase activity; GO:0042744,hydrogen peroxide catabolic process; GO:0009664,plant-type cell wall organization; GO:0006979,response to oxidative stress; GO:0048511,rhythmic process; GO:0003674,molecular_function; GO:0005488,binding; GO:0046…	Peroxidase	--	--	--
Cluster-27241.70359	K01723 hydroperoxide dehydratase [EC:4.2.1.92] | (RefSeq) allene oxide synthase 1, chloroplastic (A)	unknown [Picea sitchensis]	CP74_LINUS RecName: Full=Allene oxide synthase, chloroplastic; EC=4.2.1.92; AltName: Full=Cytochrome P450 74A; AltName: Full=Hydroperoxide dehydrase; Flags: Precursor;	A9NX03_PICSI SubName: Full=Uncharacterized protein {ECO:0000313|EMBL:ABK25164.1};	--	GO:0009507,chloroplast; GO:0020037,heme binding; GO:0047987,hydroperoxide dehydratase activity; GO:0005506,iron ion binding; GO:0004497,monooxygenase activity; GO:0016705,oxidoreductase activity, acting on paired donors, with incorporation or reduction of molecular oxygen; GO:0031408,oxylipin biosynthetic process; GO:0003674,molecular_function; GO:0005488,binding; GO:0046906,tetrapyrrole binding;…	Cytochrome P450	--	--	--
Cluster-27241.75174	K13899 cystatin-C | (RefSeq) cysteine proteinase inhibitor B (A)	BnaA01g17290D [Brassica napus]	CYT1_ACTDE RecName: Full=Cysteine proteinase inhibitor 1 {ECO:0000303|PubMed:14697268}; Short=KCPI1 {ECO:0000303|PubMed:14697268}; AltName: Full=Phytocystatin {ECO:0000312|EMBL:AAR92223.1}; AltName: Allergen=Act d 4; Flags: Precursor;	A0A078H0M6_BRANA RecName: Full=Cysteine proteinase inhibitor {ECO:0000256|RuleBase:RU362130};	--	GO:0005576,extracellular region; GO:0004869,cysteine-type endopeptidase inhibitor activity; GO:0006952,defense response; GO:0003674,molecular_function; GO:0004857,enzyme inhibitor activity; GO:0004866,endopeptidase inhibitor activity; GO:0061135,endopeptidase regulator activity; GO:0098772,molecular function regulator; GO:0030414,peptidase inhibitor activity; GO:0030234,enzyme regulator activity;…	Aspartic acid proteinase inhibitor	--	--	--
Cluster-27241.58717	K22845 phlorizin synthase [EC:2.4.1.357] | (RefSeq) UDP-glycosyltransferase 88F5 (A)	unknown [Picea sitchensis]	U72B1_ARATH RecName: Full=UDP-glycosyltransferase 72B1; EC=2.4.1.-; AltName: Full=Arbutin synthase; AltName: Full=Probable hydroquinone glucosyltransferase; EC=2.4.1.218;	A9NXT2_PICSI SubName: Full=Uncharacterized protein {ECO:0000313|EMBL:ABK25443.1};	UDP-glucuronosyl and UDP-glucosyl transferase	GO:0043231,intracellular membrane-bounded organelle; GO:0050505,hydroquinone glucosyltransferase activity; GO:0080043,quercetin 3-O-glucosyltransferase activity; GO:0080044,quercetin 7-O-glucosyltransferase activity; GO:0035251,UDP-glucosyltransferase activity; GO:0008194,UDP-glycosyltransferase activity; GO:0009809,lignin biosynthetic process; GO:0009651,response to salt stress; GO:0009636,respo…	UDP-glucoronosyl and UDP-glucosyl transferase	--	--	--
Cluster-27241.67917	K23490 cytochrome b5 | (RefSeq) cytochrome B5 (A)	unknown [Picea sitchensis]	CYB5_TOBAC RecName: Full=Cytochrome b5;	A9NMF6_PICSI SubName: Full=Uncharacterized protein {ECO:0000313|EMBL:ABK21817.1};	Cytochrome b5	GO:0005789,endoplasmic reticulum membrane; GO:0016021,integral component of membrane; GO:0031090,organelle membrane; GO:0020037,heme binding; GO:0046872,metal ion binding; GO:0055114,oxidation-reduction process; GO:0003674,molecular_function; GO:0005488,binding; GO:0046906,tetrapyrrole binding; GO:0048037,cofactor binding; GO:0097159,organic cyclic compound binding; GO:1901363,heterocyclic compou…	Cytochrome b5-like Heme/Steroid binding domain	--	--	--
Cluster-27241.70264	K15283 solute carrier family 35, member E1 | (RefSeq) xylulose 5-phosphate/phosphate translocator, chloroplastic (A)	unknown [Picea sitchensis]	--	A9P210_PICSI SubName: Full=Uncharacterized protein {ECO:0000313|EMBL:ABK26921.1};	--	GO:0016021,integral component of membrane; GO:0005509,calcium ion binding; GO:0003674,molecular_function; GO:0005488,binding; GO:0046872,metal ion binding; GO:0043167,ion binding; GO:0043169,cation binding; GO:0005575,cellular_component; GO:0016020,membrane; GO:0031224,intrinsic component of membrane; GO:0044425,membrane part	EF-hand domain pair	--	--	--
Cluster-27241.75992	K00134 glyceraldehyde 3-phosphate dehydrogenase [EC:1.2.1.12] | (RefSeq) glyceraldehyde-3-phosphate dehydrogenase, cytosolic-like (A)	RecName: Full=Glyceraldehyde-3-phosphate dehydrogenase, cytosolic AAA33779.1 glyceraldehyde-3-phosphate dehydrogenase [Pinus sylvestris]	G3PC_PINSY RecName: Full=Glyceraldehyde-3-phosphate dehydrogenase, cytosolic; EC=1.2.1.12;	A9NTQ1_PICSI RecName: Full=Glyceraldehyde-3-phosphate dehydrogenase {ECO:0000256|RuleBase:RU361160}; EC=1.2.1.- {ECO:0000256|RuleBase:RU361160};	Glyceraldehyde 3-phosphate dehydrogenase	GO:0005737,cytoplasm; GO:0004365,glyceraldehyde-3-phosphate dehydrogenase (NAD+) (phosphorylating) activity; GO:0051287,NAD binding; GO:0050661,NADP binding; GO:0006006,glucose metabolic process; GO:0006096,glycolytic process; GO:0003674,molecular_function; GO:0003824,catalytic activity; GO:0016491,oxidoreductase activity; GO:0016620,oxidoreductase activity, acting on the aldehyde or oxo group of…	Glyceraldehyde 3-phosphate dehydrogenase, C-terminal domain	--	--	--
Cluster-27241.36585	--	unknown [Picea sitchensis]	--	A9NTJ4_PICSI SubName: Full=Uncharacterized protein {ECO:0000313|EMBL:ABK23955.1};	Predicted PhzC/PhzF-type epimerase	GO:0003824,catalytic activity; GO:0009058,biosynthetic process; GO:0003674,molecular_function; GO:0008152,metabolic process; GO:0008150,biological_process	Phenazine biosynthesis-like protein	--	--	--
Cluster-27241.82849	K13070 momilactone-A synthase [EC:1.1.1.295] | (RAP-DB) Os04g0179200, MAS, MOMILACTONE_A_SYNTHASE; Similar to Stem secoisolariciresinol dehydrogenase (Fragment). (A)	unknown [Picea sitchensis]	MOMAS_ORYSJ RecName: Full=Momilactone A synthase; Short=OsMAS; EC=1.1.1.295;	C0PSK1_PICSI SubName: Full=Uncharacterized protein {ECO:0000313|EMBL:ACN40791.1};	Reductases with broad range of substrate specificities	GO:0102960,momilactone-A synthase activity; GO:0003674,molecular_function; GO:0003824,catalytic activity; GO:0016491,oxidoreductase activity; GO:0016614,oxidoreductase activity, acting on CH-OH group of donors; GO:0016616,oxidoreductase activity, acting on the CH-OH group of donors, NAD or NADP as acceptor	Enoyl-(Acyl carrier protein) reductase	--	--	--
Cluster-27241.70572	--	unknown [Picea sitchensis]	--	A9NKZ4_PICSI SubName: Full=Uncharacterized protein {ECO:0000313|EMBL:ABK21305.1};	Predicted membrane protein	--	--	--	--	--
Cluster-27241.74235	--	hypothetical protein, partial [Pinus pinaster]	--	Q8VX80_PINPS SubName: Full=Uncharacterized protein {ECO:0000313|EMBL:CAC83311.1}; Flags: Fragment;	--	--	--	--	--	--
Cluster-27241.69633	K16276 zinc finger protein-like protein | (RefSeq) zinc finger protein BRUTUS (A)	zinc finger protein BRUTUS [Amborella trichopoda]	BTS_ARATH RecName: Full=Zinc finger protein BRUTUS {ECO:0000303|PubMed:20675571}; AltName: Full=Protein EMBRYO DEFECTIVE 2454 {ECO:0000303|PubMed:20675571};	W1P2E1_AMBTC SubName: Full=Uncharacterized protein {ECO:0000313|EMBL:ERN04022.1};	Zn-finger protein	GO:0016021,integral component of membrane; GO:0005634,nucleus; GO:0005506,iron ion binding; GO:0016874,ligase activity; GO:0061630,ubiquitin protein ligase activity; GO:0008270,zinc ion binding; GO:0010106,cellular response to iron ion starvation; GO:0060586,multicellular organismal iron ion homeostasis; GO:0016567,protein ubiquitination; GO:0003674,molecular_function; GO:0005488,binding; GO:0046…	Hemerythrin HHE cation binding domain	--	--	--
Cluster-27241.75482	K23260 scopoletin glucosyltransferase [EC:2.4.1.128] | (RefSeq) scopoletin glucosyltransferase (A)	unknown [Picea sitchensis]	SCGT_TOBAC RecName: Full=Scopoletin glucosyltransferase; EC=2.4.1.128; AltName: Full=Phenylpropanoid:glucosyltransferase 1;	C0PRA8_PICSI RecName: Full=Glycosyltransferase {ECO:0000256|RuleBase:RU362057}; EC=2.4.1.- {ECO:0000256|RuleBase:RU362057};	UDP-glucuronosyl and UDP-glucosyl transferase	GO:0042802,identical protein binding; GO:0050275,scopoletin glucosyltransferase activity; GO:0008152,metabolic process; GO:0005515,protein binding; GO:0003674,molecular_function; GO:0005488,binding; GO:0003824,catalytic activity; GO:0008194,UDP-glycosyltransferase activity; GO:0016740,transferase activity; GO:0016757,transferase activity, transferring glycosyl groups; GO:0016758,transferase activ…	UDP-glucoronosyl and UDP-glucosyl transferase	--	--	--
Cluster-27241.66402	K01674 carbonic anhydrase [EC:4.2.1.1] | (RefSeq) alpha carbonic anhydrase 7-like (A)	unknown [Picea sitchensis]	ATCA7_ARATH RecName: Full=Alpha carbonic anhydrase 7; Short=AtaCA7; Short=AtalphaCA7; EC=4.2.1.1; AltName: Full=Alpha carbonate dehydratase 7; Flags: Precursor;	A9NP26_PICSI SubName: Full=Uncharacterized protein {ECO:0000313|EMBL:ABK22387.1};	Carbonic anhydrase	GO:0009570,chloroplast stroma; GO:0004089,carbonate dehydratase activity; GO:0008270,zinc ion binding; GO:0006730,one-carbon metabolic process; GO:0003674,molecular_function; GO:0003824,catalytic activity; GO:0016829,lyase activity; GO:0016835,carbon-oxygen lyase activity; GO:0016836,hydro-lyase activity; GO:0005488,binding; GO:0046872,metal ion binding; GO:0043167,ion binding; GO:0043169,cation …	Eukaryotic-type carbonic anhydrase	--	--	--
Cluster-27241.85594	--	--	--	--	--	--	--	--	--	--
Cluster-27241.65300	K10615 E3 ubiquitin-protein ligase HERC4 [EC:2.3.2.26] | (RefSeq) probable E3 ubiquitin-protein ligase HERC4 isoform X1 (A)	ultraviolet-B receptor UVR8 isoform X4 [Amborella trichopoda]	UVR8_ARATH RecName: Full=Ultraviolet-B receptor UVR8; AltName: Full=Protein UV-B RESISTANCE 8; AltName: Full=RCC1 domain-containing protein UVR8;	A0A0C9RZF0_9SPER SubName: Full=TSA: Wollemia nobilis Ref_Wollemi_Transcript_415_2290 transcribed RNA sequence {ECO:0000313|EMBL:JAG89574.1};	FOG: RCC1 domain	GO:0000785,chromatin; GO:0005829,cytosol; GO:0005634,nucleus; GO:0003682,chromatin binding; GO:0005085,guanyl-nucleotide exchange factor activity; GO:0042802,identical protein binding; GO:0009881,photoreceptor activity; GO:0042803,protein homodimerization activity; GO:0009649,entrainment of circadian clock; GO:0018298,protein-chromophore linkage; GO:0009411,response to UV; GO:0010224,response to …	Regulator of chromosome condensation (RCC1) repeat	--	--	--
Cluster-27241.76753	K09838 zeaxanthin epoxidase [EC:1.14.15.21] | (RefSeq) zeaxanthin epoxidase, chloroplastic-like (A)	unknown [Picea sitchensis]	ZEP_ONCHC RecName: Full=Zeaxanthin epoxidase, chloroplastic; Short=OgZEP; EC=1.14.15.21; Flags: Precursor;	C0PRF1_PICSI SubName: Full=Uncharacterized protein {ECO:0000313|EMBL:ACN40391.1};	Kynurenine 3-monooxygenase and related flavoprotein monooxygenases	GO:0009507,chloroplast; GO:0016020,membrane; GO:0071949,FAD binding; GO:0009540,zeaxanthin epoxidase [overall] activity; GO:0009688,abscisic acid biosynthetic process; GO:0000166,nucleotide binding; GO:0003674,molecular_function; GO:0005488,binding; GO:0036094,small molecule binding; GO:0043167,ion binding; GO:0043168,anion binding; GO:0048037,cofactor binding; GO:0050660,flavin adenine dinucleot…	FAD binding domain	--	--	--
Cluster-27241.59850	K05277 anthocyanidin synthase [EC:1.14.20.4] | (RefSeq) leucoanthocyanidin dioxygenase (A)	GA2ox10 [Pinus tabuliformis]	LDOX_PETHY RecName: Full=Leucoanthocyanidin dioxygenase; Short=LDOX; Short=Leucocyanidin oxygenase; EC=1.14.11.19 {ECO:0000250|UniProtKB:Q96323}; AltName: Full=Leucoanthocyanidin hydroxylase;	X5CY97_PINTB SubName: Full=GA2ox10 {ECO:0000313|EMBL:AHW42460.1};	Iron/ascorbate family oxidoreductases	GO:0031418,L-ascorbic acid binding; GO:0050589,leucocyanidin oxygenase activity; GO:0046872,metal ion binding; GO:0009718,anthocyanin-containing compound biosynthetic process; GO:0003674,molecular_function; GO:0030246,carbohydrate binding; GO:0005488,binding; GO:0019842,vitamin binding; GO:0031406,carboxylic acid binding; GO:0036094,small molecule binding; GO:0043167,ion binding; GO:0043168,anion…	--	--	--	--
Cluster-27241.65267	K13899 cystatin-C | (RefSeq) cysteine proteinase inhibitor B (A)	BnaA01g17290D [Brassica napus]	CYT1_ACTDE RecName: Full=Cysteine proteinase inhibitor 1 {ECO:0000303|PubMed:14697268}; Short=KCPI1 {ECO:0000303|PubMed:14697268}; AltName: Full=Phytocystatin {ECO:0000312|EMBL:AAR92223.1}; AltName: Allergen=Act d 4; Flags: Precursor;	A0A078H0M6_BRANA RecName: Full=Cysteine proteinase inhibitor {ECO:0000256|RuleBase:RU362130};	--	GO:0005576,extracellular region; GO:0004869,cysteine-type endopeptidase inhibitor activity; GO:0006952,defense response; GO:0003674,molecular_function; GO:0004857,enzyme inhibitor activity; GO:0004866,endopeptidase inhibitor activity; GO:0061135,endopeptidase regulator activity; GO:0098772,molecular function regulator; GO:0030414,peptidase inhibitor activity; GO:0030234,enzyme regulator activity;…	Aspartic acid proteinase inhibitor	--	--	--
Cluster-27241.67714	K00660 chalcone synthase [EC:2.3.1.74] | (RefSeq) CHS13; chalcone synthase 13 (A)	RecName: Full=Chalcone synthase; AltName: Full=Naringenin-chalcone synthase CAA43166.1 chalcone synthase [Pinus sylvestris]	CHSY_PINSY RecName: Full=Chalcone synthase; EC=2.3.1.74; AltName: Full=Naringenin-chalcone synthase;	A9NT16_PICSI SubName: Full=Chalcone synthase {ECO:0000313|EMBL:AEN84251.1};	--	GO:0016210,naringenin-chalcone synthase activity; GO:0009813,flavonoid biosynthetic process; GO:0003674,molecular_function; GO:0003824,catalytic activity; GO:0016740,transferase activity; GO:0016746,transferase activity, transferring acyl groups; GO:0016747,transferase activity, transferring acyl groups other than amino-acyl groups; GO:0008152,metabolic process; GO:0008150,biological_process; GO:…	Chalcone and stilbene synthases, C-terminal domain	--	--	--
Cluster-27241.84829	K07512 mitochondrial enoyl-[acyl-carrier protein] reductase / trans-2-enoyl-CoA reductase [EC:1.3.1.- 1.3.1.38] | (RefSeq) enoyl-[acyl-carrier-protein] reductase, mitochondrial-like (A)	unknown [Picea sitchensis]	MECR_ARATH RecName: Full=Enoyl-[acyl-carrier-protein] reductase, mitochondrial; EC=1.3.1.104; AltName: Full=2-enoyl thioester reductase; Flags: Precursor;	A9P0G0_PICSI SubName: Full=Uncharacterized protein {ECO:0000313|EMBL:ABK26371.1};	Zn2+-binding dehydrogenase (nuclear receptor binding factor-1)	GO:0009507,chloroplast; GO:0005739,mitochondrion; GO:0005634,nucleus; GO:0005524,ATP binding; GO:0005507,copper ion binding; GO:0016491,oxidoreductase activity; GO:0006633,fatty acid biosynthetic process; GO:0000166,nucleotide binding; GO:0003674,molecular_function; GO:0005488,binding; GO:0008144,drug binding; GO:0017076,purine nucleotide binding; GO:0030554,adenyl nucleotide binding; GO:0032553,…	Zinc-binding dehydrogenase	--	--	--
Cluster-27241.78503	--	unknown [Picea sitchensis]	--	A9NNC5_PICSI SubName: Full=Uncharacterized protein {ECO:0000313|EMBL:ABK22136.1};	--	--	--	--	--	--
Cluster-27241.84487	K01834 2,3-bisphosphoglycerate-dependent phosphoglycerate mutase [EC:5.4.2.11] | (RefSeq) uncharacterized protein LOC18421990 (A)	unknown [Picea sitchensis]	SERCL_ARATH RecName: Full=Metal-independent phosphoserine phosphatase; Short=iPSP; EC=3.1.3.3 {ECO:0000269|PubMed:22337887}; AltName: Full=Phosphoglycerate mutase-like protein 3 {ECO:0000305};	A9NVC7_PICSI SubName: Full=Uncharacterized protein {ECO:0000313|EMBL:ABK24588.1};	Phosphoglycerate mutase	GO:0005829,cytosol; GO:0016791,phosphatase activity; GO:0004647,phosphoserine phosphatase activity; GO:0070179,D-serine biosynthetic process; GO:0006564,L-serine biosynthetic process; GO:0003674,molecular_function; GO:0003824,catalytic activity; GO:0016787,hydrolase activity; GO:0016788,hydrolase activity, acting on ester bonds; GO:0042578,phosphoric ester hydrolase activity; GO:0008152,metabolic…	Histidine phosphatase superfamily (branch 1)	--	--	--
Cluster-27241.70707	--	unknown [Picea sitchensis]	--	B8LKC3_PICSI SubName: Full=Uncharacterized protein {ECO:0000313|EMBL:ABR16103.1};	--	GO:0043531,ADP binding; GO:0000166,nucleotide binding; GO:0003674,molecular_function; GO:0005488,binding; GO:0017076,purine nucleotide binding; GO:0030554,adenyl nucleotide binding; GO:0032553,ribonucleotide binding; GO:0032555,purine ribonucleotide binding; GO:0032559,adenyl ribonucleotide binding; GO:0036094,small molecule binding; GO:0043167,ion binding; GO:0043168,anion binding; GO:0097159,or…	Arabidopsis broad-spectrum mildew resistance protein RPW8	--	--	--
Cluster-27241.76599	K09753 cinnamoyl-CoA reductase [EC:1.2.1.44] | (RefSeq) cinnamoyl-CoA reductase 1-like (A)	unknown [Picea sitchensis]	DFRA_DIACA RecName: Full=Dihydroflavonol 4-reductase; Short=DFR; EC=1.1.1.219 {ECO:0000250|UniProtKB:Q9XES5}; AltName: Full=Dihydrokaempferol 4-reductase; AltName: Full=Flavanone 4-reductase; Short=FNR; EC=1.1.1.234 {ECO:0000250|UniProtKB:Q9XES5};	C0PS01_PICSI SubName: Full=Uncharacterized protein {ECO:0000313|EMBL:ACN40591.1};	Flavonol reductase/cinnamoyl-CoA reductase	GO:0050662,coenzyme binding; GO:0045552,dihydrokaempferol 4-reductase activity; GO:0047890,flavanone 4-reductase activity; GO:0009718,anthocyanin-containing compound biosynthetic process; GO:0003674,molecular_function; GO:0005488,binding; GO:0048037,cofactor binding; GO:0003824,catalytic activity; GO:0016491,oxidoreductase activity; GO:0016614,oxidoreductase activity, acting on CH-OH group of don…	NAD dependent epimerase/dehydratase family	--	--	--
Cluster-27241.71471	--	unknown [Picea sitchensis]	--	A6YR11_PICSI RecName: Full=Dirigent protein {ECO:0000256|RuleBase:RU363099}; Flags: Fragment;	--	GO:0048046,apoplast; GO:0016853,isomerase activity; GO:0003674,molecular_function; GO:0003824,catalytic activity; GO:0005575,cellular_component; GO:0005576,extracellular region	--	--	--	--
Cluster-27241.65226	K13993 HSP20 family protein | (RefSeq) 17.8 kDa class I heat shock protein-like (A)	HSP [Pinus tabuliformis]	HS181_ARATH RecName: Full=18.1 kDa class I heat shock protein; AltName: Full=18.1 kDa heat shock protein; Short=AtHsp18.1;	A0A0K0M7A4_PINTB SubName: Full=HSP {ECO:0000313|EMBL:AJP06306.1};	Molecular chaperone (small heat-shock protein Hsp26/Hsp42)	GO:0005737,cytoplasm; GO:0010286,heat acclimation; GO:0009408,response to heat; GO:0009644,response to high light intensity; GO:0042542,response to hydrogen peroxide; GO:0006950,response to stress; GO:0008150,biological_process; GO:0009266,response to temperature stimulus; GO:0009628,response to abiotic stimulus; GO:0050896,response to stimulus; GO:0009314,response to radiation; GO:0009416,respon…	Hsp20/alpha crystallin family	--	--	--
Cluster-27241.72395	--	--	--	--	--	--	--	--	--	--
Cluster-27241.53911	K12951 cobalt/nickel-transporting P-type ATPase D [EC:7.2.2.-] | (RefSeq) hypothetical protein (A)	hypothetical protein POPTR_0017s13490g [Populus trichocarpa]	OLE96_ARATH RecName: Full=Pollen-specific protein-like At4g18596; Flags: Precursor;	U5FLV7_POPTR SubName: Full=Uncharacterized protein {ECO:0000313|EMBL:ERP51204.1};	--	GO:0005615,extracellular space; GO:0005575,cellular_component; GO:0005576,extracellular region; GO:0044421,extracellular region part	Pollen proteins Ole e I like	--	--	--
Cluster-27241.83577	K05681 ATP-binding cassette, subfamily G (WHITE), member 2 | (RefSeq) ABC transporter G family member 25-like (A)	PREDICTED: ABC transporter G family member 11 [Tarenaya hassleriana]	AB11G_ARATH RecName: Full=ABC transporter G family member 11; Short=ABC transporter ABCG.11; Short=AtABCG11; AltName: Full=Protein CUTICULAR DEFECT AND ORGAN FUSION 1; AltName: Full=Protein DESPERADO; AltName: Full=Protein PERMEABLE LEAVES 1; AltName: Full=White-brown complex homolog protein 11; Short=AtWBC11;	A0A0D6R4S8_ARACU SubName: Full=Uncharacterized protein {ECO:0000313|EMBL:JAG97283.1};	Transporter, ABC superfamily (Breast cancer resistance protein)	GO:0009897,external side of plasma membrane; GO:0016021,integral component of membrane; GO:0005886,plasma membrane; GO:0005524,ATP binding; GO:0042626,ATPase activity, coupled to transmembrane movement of substances; GO:0015245,fatty acid transmembrane transporter activity; GO:0042803,protein homodimerization activity; GO:0010588,cotyledon vascular tissue pattern formation; GO:0080051,cutin trans…	ABC-2 type transporter	--	--	--
Cluster-27241.66087	K03257 translation initiation factor 4A | (RefSeq) eukaryotic initiation factor 4A-15-like isoform X1 (A)	hypothetical protein AXG93_2482s1140 [Marchantia polymorpha subsp. ruderalis]	POLX_TOBAC RecName: Full=Retrovirus-related Pol polyprotein from transposon TNT 1-94; Includes: RecName: Full=Protease; EC=3.4.23.-; Includes: RecName: Full=Reverse transcriptase; EC=2.7.7.49; Includes: RecName: Full=Endonuclease;	A0A176WI96_MARPO SubName: Full=Uncharacterized protein {ECO:0000313|EMBL:OAE32015.1};	FOG: Transposon-encoded proteins with TYA, reverse transcriptase, integrase domains in various combinations	GO:0004190,aspartic-type endopeptidase activity; GO:0004519,endonuclease activity; GO:0003676,nucleic acid binding; GO:0003964,RNA-directed DNA polymerase activity; GO:0008270,zinc ion binding; GO:0015074,DNA integration; GO:0003674,molecular_function; GO:0003824,catalytic activity; GO:0004175,endopeptidase activity; GO:0008233,peptidase activity; GO:0070011,peptidase activity, acting on L-amino …	gag-polypeptide of LTR copia-type	--	--	--
Cluster-27241.78525	--	unknown [Picea sitchensis]	--	A9NQZ4_PICSI SubName: Full=Uncharacterized protein {ECO:0000313|EMBL:ABK23055.1};	--	--	--	--	--	--
Cluster-27241.77004	K09841 xanthoxin dehydrogenase [EC:1.1.1.288] | (RefSeq) xanthoxin dehydrogenase-like (A)	BSU5 [Pinus tabuliformis]	SDR2A_ARATH RecName: Full=Short-chain dehydrogenase reductase 2a; Short=AtSDR2a; EC=1.1.1.-;	A0A0K0M797_PINTB SubName: Full=BSU5 {ECO:0000313|EMBL:AJP06249.1};	Reductases with broad range of substrate specificities	GO:0016491,oxidoreductase activity; GO:0003674,molecular_function; GO:0003824,catalytic activity	Enoyl-(Acyl carrier protein) reductase	--	--	--
Cluster-27241.63488	K13993 HSP20 family protein | (RefSeq) 17.4 kDa class III heat shock protein (A)	unknown [Picea sitchensis]	HS174_ARATH RecName: Full=17.4 kDa class III heat shock protein; AltName: Full=17.4 kDa heat shock protein 2; Short=AtHsp17.4B;	A9NSY4_PICSI SubName: Full=Uncharacterized protein {ECO:0000313|EMBL:ABK23745.1};	Molecular chaperone (small heat-shock protein Hsp26/Hsp42)	GO:0005737,cytoplasm; GO:0009408,response to heat; GO:0009644,response to high light intensity; GO:0042542,response to hydrogen peroxide; GO:0006950,response to stress; GO:0008150,biological_process; GO:0009266,response to temperature stimulus; GO:0009628,response to abiotic stimulus; GO:0050896,response to stimulus; GO:0009314,response to radiation; GO:0009416,response to light stimulus; GO:0009…	Hsp20/alpha crystallin family	--	--	--
Cluster-27241.76049	--	unknown [Picea sitchensis]	--	A9NRJ8_PICSI SubName: Full=Uncharacterized protein {ECO:0000313|EMBL:ABK23259.1};	FOG: PPR repeat	--	Protein of unknown function (DUF1685)	--	--	--
Cluster-27241.52731	--	--	--	--	--	--	--	--	--	--
Cluster-27241.67539	K13993 HSP20 family protein | (RefSeq) 17.3 kDa class I heat shock protein-like (A)	small heat-shock protein [Funaria hygrometrica]	HSP11_SOYBN RecName: Full=17.3 kDa class I heat shock protein; AltName: Full=HSP 17.3;	A0A0C9S834_9SPER SubName: Full=TSA: Wollemia nobilis Ref_Wollemi_Transcript_6203_1027 transcribed RNA sequence {ECO:0000313|EMBL:JAG88672.1};	Molecular chaperone (small heat-shock protein Hsp26/Hsp42)	GO:0005737,cytoplasm; GO:0005622,intracellular; GO:0005575,cellular_component; GO:0005623,cell; GO:0044424,intracellular part; GO:0044464,cell part	Hsp20/alpha crystallin family	--	--	--
Cluster-27241.60688	--	hypothetical protein TanjilG_16405 [Lupinus angustifolius]	PRP4_ARATH RecName: Full=Proline-rich protein 4; Short=AtPRP4; Flags: Precursor;	A0A1J7H7I7_LUPAN SubName: Full=Uncharacterized protein {ECO:0000313|EMBL:OIW08824.1};	--	GO:0005618,cell wall; GO:0005576,extracellular region; GO:0005575,cellular_component; GO:0005623,cell; GO:0030312,external encapsulating structure; GO:0044464,cell part; GO:0071944,cell periphery	Pollen proteins Ole e I like	--	--	--
Cluster-27241.61491	--	unknown [Picea sitchensis]	--	A9NMZ2_PICSI SubName: Full=Uncharacterized protein {ECO:0000313|EMBL:ABK22003.1};	--	GO:0016021,integral component of membrane; GO:0005575,cellular_component; GO:0016020,membrane; GO:0031224,intrinsic component of membrane; GO:0044425,membrane part	Cotton fibre expressed protein	--	--	--
Cluster-27241.71163	K16290 xylem cysteine proteinase [EC:3.4.22.-] | (RefSeq) cysteine protease XCP1 (A)	PREDICTED: cysteine protease XCP1 [Elaeis guineensis]	XCP2_ARATH RecName: Full=Cysteine protease XCP2 {ECO:0000305}; EC=3.4.22.-; AltName: Full=Xylem cysteine peptidase 2 {ECO:0000303|PubMed:10889267}; Short=AtXCP2 {ECO:0000303|PubMed:10889267}; Flags: Precursor;	W1PUR8_AMBTC SubName: Full=Uncharacterized protein {ECO:0000313|EMBL:ERN11574.1};	Cysteine proteinase Cathepsin L	GO:0005618,cell wall; GO:0005615,extracellular space; GO:0005764,lysosome; GO:0005886,plasma membrane; GO:0004197,cysteine-type endopeptidase activity; GO:0042742,defense response to bacterium; GO:0010623,programmed cell death involved in cell development; GO:0051603,proteolysis involved in cellular protein catabolic process; GO:0003674,molecular_function; GO:0003824,catalytic activity; GO:000417…	Papain family cysteine protease	--	--	--
Cluster-27241.71165	--	unknown [Picea sitchensis]	--	A9NKB7_PICSI SubName: Full=Uncharacterized protein {ECO:0000313|EMBL:ABK21078.1};	--	--	--	--	--	--
Cluster-27241.77939	--	unknown [Picea sitchensis]	40G3_ORYSJ RecName: Full=Ricin B-like lectin R40G3 {ECO:0000305}; AltName: Full=Osr40g3 {ECO:0000303|PubMed:9265787};	A9NRP6_PICSI SubName: Full=Uncharacterized protein {ECO:0000313|EMBL:ABK23307.1};	--	GO:0030246,carbohydrate binding; GO:0003674,molecular_function; GO:0005488,binding	Protein of unknown function (DUF3592)	--	--	--
Cluster-27241.67163	--	unknown [Picea sitchensis]	NDRP1_ARATH RecName: Full=Nodulin-related protein 1 {ECO:0000303|PubMed:20016941}; Short=AtNRP1 {ECO:0000303|PubMed:20016941}; AltName: Full=RPS2-interacting protein 11 {ECO:0000303|Ref.5};	B8LRD9_PICSI SubName: Full=Uncharacterized protein {ECO:0000313|EMBL:ABR18219.1};	--	GO:0009738,abscisic acid-activated signaling pathway; GO:0006952,defense response; GO:1900426,positive regulation of defense response to bacterium; GO:0009617,response to bacterium; GO:0009409,response to cold; GO:0009408,response to heat; GO:0009651,response to salt stress; GO:0001101,response to acid chemical; GO:0007165,signal transduction; GO:0007154,cell communication; GO:0008150,biological_…	--	--	--	--
Cluster-27241.76408	--	--	--	--	--	--	--	--	--	--
Cluster-27241.79945	K06118 UDP-sulfoquinovose synthase [EC:3.13.1.1] | (RefSeq) UDP-sulfoquinovose synthase, chloroplastic (A)	unknown [Picea sitchensis]	SQD1_ARATH RecName: Full=UDP-sulfoquinovose synthase, chloroplastic; EC=3.13.1.1; AltName: Full=Sulfite:UDP-glucose sulfotransferase; AltName: Full=Sulfolipid biosynthesis protein; Flags: Precursor;	B8LLY1_PICSI SubName: Full=Uncharacterized protein {ECO:0000313|EMBL:ABR16661.1};	UDP-glucose 4-epimerase/UDP-sulfoquinovose synthase	GO:0009507,chloroplast; GO:0050662,coenzyme binding; GO:0008146,sulfotransferase activity; GO:0046507,UDPsulfoquinovose synthase activity; GO:0008270,zinc ion binding; GO:0016036,cellular response to phosphate starvation; GO:0009247,glycolipid biosynthetic process; GO:0003674,molecular_function; GO:0005488,binding; GO:0048037,cofactor binding; GO:0003824,catalytic activity; GO:0016740,transferase…	NAD dependent epimerase/dehydratase family	--	--	--
Cluster-27241.81540	K10781 fatty acyl-ACP thioesterase B [EC:3.1.2.14 3.1.2.21] | (RefSeq) uncharacterized protein LOC113347984 isoform X1 (A)	unknown [Picea sitchensis]	ML423_ARATH RecName: Full=MLP-like protein 423;	A9NMK0_PICSI SubName: Full=Uncharacterized protein {ECO:0000313|EMBL:ABK21861.1};	--	GO:0016020,membrane; GO:0006952,defense response; GO:0009607,response to biotic stimulus; GO:0006950,response to stress; GO:0008150,biological_process; GO:0050896,response to stimulus; GO:0005575,cellular_component	Pathogenesis-related protein Bet v I family	--	--	--
Cluster-27241.80009	K16280 E3 ubiquitin-protein ligase RGLG [EC:2.3.2.27] | (RefSeq) E3 ubiquitin-protein ligase RGLG2-like isoform X1 (A)	PREDICTED: GDSL esterase/lipase At5g03610 isoform X1 [Vitis vinifera]	GDL71_ARATH RecName: Full=GDSL esterase/lipase At5g03610; EC=3.1.1.-; AltName: Full=Extracellular lipase At5g03610; Flags: Precursor;	D7TJ40_VITVI SubName: Full=Uncharacterized protein {ECO:0000313|EMBL:CBI30266.3};	--	GO:0005576,extracellular region; GO:0016788,hydrolase activity, acting on ester bonds; GO:0016042,lipid catabolic process; GO:0003674,molecular_function; GO:0003824,catalytic activity; GO:0016787,hydrolase activity; GO:0008152,metabolic process; GO:0006629,lipid metabolic process; GO:0008150,biological_process; GO:0009056,catabolic process; GO:0044238,primary metabolic process; GO:0071704,organic…	GDSL-like Lipase/Acylhydrolase	--	--	--
Cluster-27241.45980	--	unknown [Picea sitchensis]	CPRF2_PETCR RecName: Full=Light-inducible protein CPRF2; AltName: Full=Common plant regulatory factor 2; Short=CPRF-2;	B8LQ62_PICSI SubName: Full=Uncharacterized protein {ECO:0000313|EMBL:ABR17792.1};	--	GO:0005634,nucleus; GO:0003677,DNA binding; GO:0003700,DNA-binding transcription factor activity; GO:0006351,transcription, DNA-templated; GO:0003674,molecular_function; GO:0003676,nucleic acid binding; GO:0005488,binding; GO:0097159,organic cyclic compound binding; GO:1901363,heterocyclic compound binding; GO:0140110,transcription regulator activity; GO:0008152,metabolic process; GO:0006139,nucl…	Basic leucine-zipper C terminal	bZIP	TF	bZIP
Cluster-27241.49518	--	unknown [Picea sitchensis]	COL9_ARATH RecName: Full=Zinc finger protein CONSTANS-LIKE 9;	A0A0D6QR80_ARACU SubName: Full=Uncharacterized protein {ECO:0000313|EMBL:JAG93302.1};	--	GO:0005634,nucleus; GO:0003700,DNA-binding transcription factor activity; GO:0008270,zinc ion binding; GO:0007623,circadian rhythm; GO:0048579,negative regulation of long-day photoperiodism, flowering; GO:0006355,regulation of transcription, DNA-templated; GO:0140110,transcription regulator activity; GO:0003674,molecular_function; GO:0005488,binding; GO:0046872,metal ion binding; GO:0043167,ion b…	CCT motif	Others	TR	Others
Cluster-27241.69555	K03062 26S proteasome regulatory subunit T2 | (RefSeq) 26S proteasome regulatory subunit 4 homolog B (A)	unknown [Picea sitchensis]	PRS4_ORYSJ RecName: Full=26S proteasome regulatory subunit 4 homolog; AltName: Full=Tat-binding protein homolog 2;	B8LKT7_PICSI SubName: Full=Uncharacterized protein {ECO:0000313|EMBL:ABR16267.1};	26S proteasome regulatory complex, ATPase RPT2	GO:0031597,cytosolic proteasome complex; GO:0031595,nuclear proteasome complex; GO:0008540,proteasome regulatory particle, base subcomplex; GO:0005524,ATP binding; GO:0036402,proteasome-activating ATPase activity; GO:0017025,TBP-class protein binding; GO:0045899,positive regulation of RNA polymerase II transcriptional preinitiation complex assembly; GO:0030433,ubiquitin-dependent ERAD pathway; GO…	ATPase family associated with various cellular activities (AAA)	--	--	--
Cluster-27241.78143	K07936 GTP-binding nuclear protein Ran | (RefSeq) GTP-binding nuclear protein Ran1A isoform X1 (A)	unknown [Picea sitchensis]	RAN_VICFA RecName: Full=GTP-binding nuclear protein Ran/TC4;	A9NLB5_PICSI RecName: Full=GTP-binding nuclear protein {ECO:0000256|RuleBase:RU363057};	GTPase Ran/TC4/GSP1 (nuclear protein transport pathway), small G protein superfamily	GO:0005634,nucleus; GO:0005525,GTP binding; GO:0003924,GTPase activity; GO:0006913,nucleocytoplasmic transport; GO:0015031,protein transport; GO:0000166,nucleotide binding; GO:0001882,nucleoside binding; GO:0001883,purine nucleoside binding; GO:0003674,molecular_function; GO:0005488,binding; GO:0017076,purine nucleotide binding; GO:0019001,guanyl nucleotide binding; GO:0032549,ribonucleoside bind…	Ras family	--	--	--
Cluster-27241.59609	--	unknown [Picea sitchensis]	--	A9NSV5_PICSI SubName: Full=Uncharacterized protein {ECO:0000313|EMBL:ABK23716.1};	--	--	--	--	--	--
Cluster-27241.93918	K15404 aldehyde decarbonylase [EC:4.1.99.5] | (RefSeq) protein ECERIFERUM 1-like (A)	PREDICTED: protein ECERIFERUM 1-like [Elaeis guineensis]	CER1_ARATH RecName: Full=Protein ECERIFERUM 1;	A0A176VX58_MARPO SubName: Full=Uncharacterized protein {ECO:0000313|EMBL:OAE24476.1};	--	GO:0005789,endoplasmic reticulum membrane; GO:0016021,integral component of membrane; GO:0005506,iron ion binding; GO:0016491,oxidoreductase activity; GO:0043447,alkane biosynthetic process; GO:0042742,defense response to bacterium; GO:0050832,defense response to fungus; GO:0008610,lipid biosynthetic process; GO:0006629,lipid metabolic process; GO:0009414,response to water deprivation; GO:0010025…	WAX2 C-terminal domain	--	--	--
Cluster-27241.71475	K25075 pterocarpan synthase [EC:4.2.1.139] | (RefSeq) hypothetical protein (A)	unknown [Picea sitchensis]	DIR11_ARATH RecName: Full=Dirigent protein 11; Short=AtDIR11; Flags: Precursor;	A6YR04_PICSI RecName: Full=Dirigent protein {ECO:0000256|RuleBase:RU363099};	--	GO:0048046,apoplast; GO:0016853,isomerase activity; GO:0003674,molecular_function; GO:0003824,catalytic activity; GO:0005575,cellular_component; GO:0005576,extracellular region	Dirigent-like protein	--	--	--
Cluster-27241.68991	--	--	--	--	--	--	--	--	--	--
Cluster-27241.62324	K01193 beta-fructofuranosidase [EC:3.2.1.26] | (RefSeq) beta-fructofuranosidase, insoluble isoenzyme 3-like (A)	putative UPF0481 protein At3g02645 [Vigna radiata var. radiata]	Y3264_ARATH RecName: Full=Putative UPF0481 protein At3g02645;	A0A1S3VA39_VIGRR SubName: Full=putative UPF0481 protein At3g02645 {ECO:0000313|RefSeq:XP_014515221.1};	--	GO:0016021,integral component of membrane; GO:0005575,cellular_component; GO:0016020,membrane; GO:0031224,intrinsic component of membrane; GO:0044425,membrane part	Plant protein of unknown function	--	--	--
Cluster-27241.70318	--	unknown [Picea sitchensis]	--	B8LKC3_PICSI SubName: Full=Uncharacterized protein {ECO:0000313|EMBL:ABR16103.1};	--	GO:0043531,ADP binding; GO:0000166,nucleotide binding; GO:0003674,molecular_function; GO:0005488,binding; GO:0017076,purine nucleotide binding; GO:0030554,adenyl nucleotide binding; GO:0032553,ribonucleotide binding; GO:0032555,purine ribonucleotide binding; GO:0032559,adenyl ribonucleotide binding; GO:0036094,small molecule binding; GO:0043167,ion binding; GO:0043168,anion binding; GO:0097159,or…	Leucine rich repeat	--	--	--
Cluster-27241.64700	--	unknown [Picea sitchensis]	MT3_PICGL RecName: Full=Metallothionein-like protein EMB30;	A9NJR3_PICSI SubName: Full=Uncharacterized protein {ECO:0000313|EMBL:ABK20874.1};	--	GO:0046872,metal ion binding; GO:0003674,molecular_function; GO:0005488,binding; GO:0043167,ion binding; GO:0043169,cation binding	--	--	--	--
Cluster-27241.73419	K13459 disease resistance protein RPS2 | (RefSeq) disease resistance protein At4g27190-like (A)	putative CC-NBS-LRR protein, partial [Pinus monticola]	R13L4_ARATH RecName: Full=Disease resistance RPP13-like protein 4; AltName: Full=Disease resistance protein ZAR1 {ECO:0000305}; AltName: Full=Protein HOPZ-ACTIVATED RESISTANCE 1;	A0A0D6QRI0_ARACU SubName: Full=Uncharacterized protein {ECO:0000313|EMBL:JAG93802.1};	Apoptotic ATPase	GO:0005886,plasma membrane; GO:0043531,ADP binding; GO:0005524,ATP binding; GO:0043621,protein self-association; GO:0006952,defense response; GO:0050829,defense response to Gram-negative bacterium; GO:0007165,signal transduction; GO:0000166,nucleotide binding; GO:0003674,molecular_function; GO:0005488,binding; GO:0017076,purine nucleotide binding; GO:0030554,adenyl nucleotide binding; GO:0032553,…	NB-ARC domain	--	--	--
Cluster-27241.70148	--	--	--	--	--	--	--	--	--	--
Cluster-27241.70493	K09510 DnaJ homolog subfamily B member 4 | (RefSeq) hypothetical protein (A)	PREDICTED: dnaJ homolog subfamily B member 8 isoform X1 [Prunus mume]	DJC16_ORYSJ RecName: Full=DnaJ protein P58IPK homolog A {ECO:0000305}; Short=OsP58A {ECO:0000303|PubMed:24153418}; AltName: Full=Chaperone protein dnaJ C16 {ECO:0000305}; Short=OsDjC16 {ECO:0000303|PubMed:23160806}; Flags: Precursor;	A0A0D6R9Y9_ARACU SubName: Full=Uncharacterized protein {ECO:0000313|EMBL:JAG99248.1};	Molecular chaperone (DnaJ superfamily)	GO:0005788,endoplasmic reticulum lumen; GO:0005622,intracellular; GO:0005575,cellular_component; GO:0005623,cell; GO:0005737,cytoplasm; GO:0005783,endoplasmic reticulum; GO:0043231,intracellular membrane-bounded organelle; GO:0012505,endomembrane system; GO:0031974,membrane-enclosed lumen; GO:0043226,organelle; GO:0043227,membrane-bounded organelle; GO:0043229,intracellular organelle; GO:0043233,…	DnaJ domain	--	--	--
Cluster-27241.51933	K20224 importin-9 | (RefSeq) Importin-9 (A)	activator of 90 kDa heat shock protein ATPase homolog [Amborella trichopoda]	--	W1PSW2_AMBTC SubName: Full=Uncharacterized protein {ECO:0000313|EMBL:ERN11128.1};	Uncharacterized conserved protein	GO:0001671,ATPase activator activity; GO:0051087,chaperone binding; GO:0006950,response to stress; GO:0003674,molecular_function; GO:0008047,enzyme activator activity; GO:0098772,molecular function regulator; GO:0030234,enzyme regulator activity; GO:0060589,nucleoside-triphosphatase regulator activity; GO:0060590,ATPase regulator activity; GO:0005515,protein binding; GO:0005488,binding; GO:000815…	Activator of Hsp90 ATPase, N-terminal	--	--	--
Cluster-27241.76140	--	--	--	--	--	--	--	--	--	--
Cluster-27241.70762	K05359 arogenate/prephenate dehydratase [EC:4.2.1.91 4.2.1.51] | (RefSeq) arogenate dehydratase/prephenate dehydratase 2, chloroplastic-like (A)	arogenate dehydratase [Pinus pinaster]	--	A0A1I9WKA4_PINPS SubName: Full=Arogenate dehydratase {ECO:0000313|EMBL:APA32586.1};	--	GO:0005737,cytoplasm; GO:0004106,chorismate mutase activity; GO:0004664,prephenate dehydratase activity; GO:0009094,L-phenylalanine biosynthetic process; GO:0003674,molecular_function; GO:0003824,catalytic activity; GO:0016853,isomerase activity; GO:0016866,intramolecular transferase activity; GO:0016829,lyase activity; GO:0016835,carbon-oxygen lyase activity; GO:0016836,hydro-lyase activity; GO:…	--	--	--	--
Cluster-27241.60279	K09591 steroid 5-alpha-reductase [EC:1.3.1.22] | (RefSeq) steroid 5-alpha-reductase DET2 (A)	unknown [Picea sitchensis]	DET2_GOSHI RecName: Full=Steroid 5-alpha-reductase DET2; Short=GhDET2; EC=1.3.1.22;	A0A0D6QSV6_ARACU SubName: Full=Uncharacterized protein {ECO:0000313|EMBL:JAG93516.1};	Steroid reductase	GO:0005737,cytoplasm; GO:0016021,integral component of membrane; GO:0003865,3-oxo-5-alpha-steroid 4-dehydrogenase activity; GO:0047751,cholestenone 5-alpha-reductase activity; GO:0050213,progesterone 5-alpha-reductase activity; GO:0016132,brassinosteroid biosynthetic process; GO:0055114,oxidation-reduction process; GO:0090378,seed trichome elongation; GO:0090377,seed trichome initiation; GO:00036…	3-oxo-5-alpha-steroid 4-dehydrogenase	--	--	--
Cluster-27241.73448	--	--	--	--	--	--	TILa domain	--	--	--
Cluster-27241.63642	K04077 chaperonin GroEL | (RefSeq) ruBisCO large subunit-binding protein subunit beta, chloroplastic (A)	unknown [Picea sitchensis]	CPNB2_ARATH RecName: Full=Chaperonin 60 subunit beta 2, chloroplastic; Short=CPN-60 beta 2; Flags: Precursor;	A9NV22_PICSI SubName: Full=Uncharacterized protein {ECO:0000313|EMBL:ABK24483.1};	Mitochondrial chaperonin, Cpn60/Hsp60p	GO:0009507,chloroplast; GO:0009941,chloroplast envelope; GO:0009570,chloroplast stroma; GO:0022626,cytosolic ribosome; GO:0005739,mitochondrion; GO:0005730,nucleolus; GO:0005634,nucleus; GO:0005524,ATP binding; GO:0044183,protein binding involved in protein folding; GO:0051082,unfolded protein binding; GO:0006458,'de novo' protein folding; GO:0061077,chaperone-mediated protein folding; GO:0007005…	TCP-1/cpn60 chaperonin family	--	--	--
Cluster-27241.60463	K01593 aromatic-L-amino-acid/L-tryptophan decarboxylase [EC:4.1.1.28 4.1.1.105] | (GenBank) tyrosine/DOPA decarboxylase (A)	unknown [Picea sitchensis]	--	A9NPV3_PICSI SubName: Full=Uncharacterized protein {ECO:0000313|EMBL:ABK22664.1};	--	--	Protein of unknown function (DUF674)	--	--	--
Cluster-27241.68360	--	unknown [Picea sitchensis]	NLTP2_BRANA RecName: Full=Non-specific lipid-transfer protein 2; Short=LTP 2; Flags: Precursor;	A9NP77_PICSI RecName: Full=Non-specific lipid-transfer protein {ECO:0000256|RuleBase:RU000628};	--	GO:0008289,lipid binding; GO:0006869,lipid transport; GO:0003674,molecular_function; GO:0005488,binding; GO:0006810,transport; GO:0008150,biological_process; GO:0010876,lipid localization; GO:0033036,macromolecule localization; GO:0051179,localization; GO:0051234,establishment of localization; GO:0071702,organic substance transport	--	--	--	--
Cluster-27241.69716	K13993 HSP20 family protein | (RefSeq) 17.6 kDa class I heat shock protein 2 (A)	unknown [Picea sitchensis]	HSP11_PEA RecName: Full=18.1 kDa class I heat shock protein; AltName: Full=HSP 18.1;	A9P1C1_PICSI SubName: Full=Uncharacterized protein {ECO:0000313|EMBL:ABK26682.1};	Molecular chaperone (small heat-shock protein Hsp26/Hsp42)	GO:0005737,cytoplasm; GO:0043234,NA; GO:0042802,identical protein binding; GO:0051260,protein homooligomerization; GO:0050821,protein stabilization; GO:0005515,protein binding; GO:0003674,molecular_function; GO:0005488,binding; GO:0008150,biological_process; GO:0009987,cellular process; GO:0022607,cellular component assembly; GO:0016043,cellular component organization; GO:0043933,protein-containi…	Hsp20/alpha crystallin family	--	--	--
Cluster-27241.76052	K05277 anthocyanidin synthase [EC:1.14.20.4] | (RefSeq) leucoanthocyanidin dioxygenase (A)	unknown [Picea sitchensis]	LDOX_PETHY RecName: Full=Leucoanthocyanidin dioxygenase; Short=LDOX; Short=Leucocyanidin oxygenase; EC=1.14.11.19 {ECO:0000250|UniProtKB:Q96323}; AltName: Full=Leucoanthocyanidin hydroxylase;	A9NVW2_PICSI SubName: Full=Uncharacterized protein {ECO:0000313|EMBL:ABK24773.1};	Iron/ascorbate family oxidoreductases	GO:0031418,L-ascorbic acid binding; GO:0050589,leucocyanidin oxygenase activity; GO:0046872,metal ion binding; GO:0009718,anthocyanin-containing compound biosynthetic process; GO:0003674,molecular_function; GO:0030246,carbohydrate binding; GO:0005488,binding; GO:0019842,vitamin binding; GO:0031406,carboxylic acid binding; GO:0036094,small molecule binding; GO:0043167,ion binding; GO:0043168,anion…	--	--	--	--
Cluster-27241.69414	K07213 copper chaperone | (RefSeq) copper transport protein ATX1-like isoform X1 (A)	PREDICTED: heavy metal-associated isoprenylated plant protein 20 [Nelumbo nucifera]	HIP45_ARATH RecName: Full=Heavy metal-associated isoprenylated plant protein 45 {ECO:0000303|PubMed:21072340, ECO:0000303|PubMed:23368984}; Short=AtHIP45 {ECO:0000303|PubMed:21072340, ECO:0000303|PubMed:23368984}; Flags: Precursor;	A0A1U7ZAQ2_NELNU SubName: Full=heavy metal-associated isoprenylated plant protein 20 {ECO:0000313|RefSeq:XP_010248218.1};	Copper chaperone	GO:0005737,cytoplasm; GO:0046914,transition metal ion binding; GO:0046916,cellular transition metal ion homeostasis; GO:0030001,metal ion transport; GO:0003674,molecular_function; GO:0005488,binding; GO:0046872,metal ion binding; GO:0043167,ion binding; GO:0043169,cation binding; GO:0006873,cellular ion homeostasis; GO:0006875,cellular metal ion homeostasis; GO:0008150,biological_process; GO:0009…	Heavy-metal-associated domain	--	--	--
Cluster-27241.53947	--	hypothetical protein 0_3046_01, partial [Pinus mugo]	--	K7NWI1_PINMU SubName: Full=Uncharacterized protein {ECO:0000313|EMBL:AFB32810.1}; Flags: Fragment;	--	--	--	--	--	--
Cluster-27241.68180	K01070 S-formylglutathione hydrolase [EC:3.1.2.12] | (RefSeq) S-formylglutathione hydrolase isoform X1 (A)	unknown [Picea sitchensis]	SFGH_ARATH RecName: Full=S-formylglutathione hydrolase; Short=AtSFGH; EC=3.1.2.12; AltName: Full=Esterase D;	A9NNG6_PICSI RecName: Full=S-formylglutathione hydrolase {ECO:0000256|RuleBase:RU363068}; EC=3.1.2.12 {ECO:0000256|RuleBase:RU363068};	Esterase D	GO:0048046,apoplast; GO:0052689,carboxylic ester hydrolase activity; GO:0018738,S-formylglutathione hydrolase activity; GO:0046294,formaldehyde catabolic process; GO:0046686,response to cadmium ion; GO:0003674,molecular_function; GO:0003824,catalytic activity; GO:0016787,hydrolase activity; GO:0016788,hydrolase activity, acting on ester bonds; GO:0016790,thiolester hydrolase activity; GO:0008152,…	Putative esterase	--	--	--
Cluster-27241.60066	--	predicted protein [Physcomitrella patens]	--	A9SZ39_PHYPA SubName: Full=Predicted protein {ECO:0000313|EMBL:EDQ63557.1};	--	GO:0005737,cytoplasm; GO:0008757,S-adenosylmethionine-dependent methyltransferase activity; GO:0032259,methylation; GO:0003674,molecular_function; GO:0003824,catalytic activity; GO:0008168,methyltransferase activity; GO:0016740,transferase activity; GO:0016741,transferase activity, transferring one-carbon groups; GO:0008152,metabolic process; GO:0008150,biological_process; GO:0005622,intracellula…	--	--	--	--
Cluster-27241.71092	K03695 ATP-dependent Clp protease ATP-binding subunit ClpB | (RefSeq) LOW QUALITY PROTEIN: chaperone protein ClpB3, chloroplastic-like (A)	unknown [Picea sitchensis]	JAL3_ARATH RecName: Full=Jacalin-related lectin 3; AltName: Full=Mannose-binding lectin superfamily protein;	A9NLT2_PICSI SubName: Full=Uncharacterized protein {ECO:0000313|EMBL:ABK21593.1};	--	GO:0030246,carbohydrate binding; GO:0003674,molecular_function; GO:0005488,binding	Jacalin-like lectin domain	--	--	--
Cluster-27241.80494	--	--	--	--	--	--	--	--	--	--
Cluster-27241.67470	--	unknown [Picea sitchensis]	MLP43_ARATH RecName: Full=MLP-like protein 43;	A9NTW6_PICSI SubName: Full=Uncharacterized protein {ECO:0000313|EMBL:ABK24077.1};	--	GO:0009507,chloroplast; GO:0006952,defense response; GO:0009607,response to biotic stimulus; GO:0006950,response to stress; GO:0008150,biological_process; GO:0050896,response to stimulus; GO:0005622,intracellular; GO:0005575,cellular_component; GO:0005623,cell; GO:0005737,cytoplasm; GO:0043231,intracellular membrane-bounded organelle; GO:0009536,plastid; GO:0043226,organelle; GO:0043227,membrane-…	Pathogenesis-related protein Bet v I family	--	--	--
Cluster-27241.65206	K13993 HSP20 family protein | (RefSeq) 18.2 kDa class I heat shock protein (A)	HSP [Pinus tabuliformis]	HS181_ARATH RecName: Full=18.1 kDa class I heat shock protein; AltName: Full=18.1 kDa heat shock protein; Short=AtHsp18.1;	A0A0K0M7A4_PINTB SubName: Full=HSP {ECO:0000313|EMBL:AJP06306.1};	Molecular chaperone (small heat-shock protein Hsp26/Hsp42)	GO:0005737,cytoplasm; GO:0010286,heat acclimation; GO:0009408,response to heat; GO:0009644,response to high light intensity; GO:0042542,response to hydrogen peroxide; GO:0006950,response to stress; GO:0008150,biological_process; GO:0009266,response to temperature stimulus; GO:0009628,response to abiotic stimulus; GO:0050896,response to stimulus; GO:0009314,response to radiation; GO:0009416,respon…	Hsp20/alpha crystallin family	--	--	--
Cluster-27241.33400	--	probable strigolactone esterase DAD2 [Hevea brasiliensis]	DAD2_PETHY RecName: Full=Probable strigolactone esterase DAD2; Short=3.1.-.-; AltName: Full=Protein DECREASED APICAL DOMINANCE 2;	W1PSS0_AMBTC SubName: Full=Uncharacterized protein {ECO:0000313|EMBL:ERN10899.1};	--	GO:0016788,hydrolase activity, acting on ester bonds; GO:0010223,secondary shoot formation; GO:1901601,strigolactone biosynthetic process; GO:0003674,molecular_function; GO:0003824,catalytic activity; GO:0016787,hydrolase activity; GO:0001763,morphogenesis of a branching structure; GO:0007275,multicellular organism development; GO:0009653,anatomical structure morphogenesis; GO:0008150,biological_…	alpha/beta hydrolase fold	--	--	--
Cluster-27241.64773	K00695 sucrose synthase [EC:2.4.1.13] | (RefSeq) hypothetical protein (A)	sucrose synthase [Pinus taeda]	SUS3_ARATH RecName: Full=Sucrose synthase 3; Short=AtSUS3; EC=2.4.1.13; AltName: Full=Sucrose-UDP glucosyltransferase 3;	A6N837_PINTA RecName: Full=Sucrose synthase {ECO:0000256|RuleBase:RU280817}; EC=2.4.1.13 {ECO:0000256|RuleBase:RU280817};	Glycosyltransferase	GO:0016157,sucrose synthase activity; GO:0010555,response to mannitol; GO:0009414,response to water deprivation; GO:0010431,seed maturation; GO:0005982,starch metabolic process; GO:0005985,sucrose metabolic process; GO:0003674,molecular_function; GO:0003824,catalytic activity; GO:0008194,UDP-glycosyltransferase activity; GO:0016740,transferase activity; GO:0016757,transferase activity, transferri…	Sucrose synthase	--	--	--
Cluster-27241.69695	K09422 transcription factor MYB, plant | (RefSeq) transcription repressor MYB5 (A)	MYB transcription factor MYB2 [Pinus radiata]	MYB5_ARATH RecName: Full=Transcription repressor MYB5; AltName: Full=AtM2; AltName: Full=Myb-related protein 5; Short=AtMYB5;	A0A1U9VW60_PINRA SubName: Full=MYB transcription factor MYB2 {ECO:0000313|EMBL:AQW79620.1};	Transcription factor, Myb superfamily	GO:0005634,nucleus; GO:0003700,DNA-binding transcription factor activity; GO:0000981,DNA-binding transcription factor activity, RNA polymerase II-specific; GO:0043565,sequence-specific DNA binding; GO:0001135,RNA polymerase II transcription regulator recruiting activity; GO:0044212,transcription regulatory region DNA binding; GO:0048354,mucilage biosynthetic process involved in seed coat developm…	Myb-like DNA-binding domain	MYB-related	TF	MYB->MYB-related
Cluster-27241.83020	K01728 pectate lyase [EC:4.2.2.2] | (RefSeq) probable pectate lyase 8 (A)	hypothetical protein 2_4617_01, partial [Pinus taeda]	PLY15_ARATH RecName: Full=Probable pectate lyase 15; EC=4.2.2.2; AltName: Full=Pectate lyase A11; Flags: Precursor;	H9WXI8_PINTA SubName: Full=Uncharacterized protein {ECO:0000313|EMBL:AFG66731.1}; Flags: Fragment;	--	GO:0046872,metal ion binding; GO:0030570,pectate lyase activity; GO:0045490,pectin catabolic process; GO:0003674,molecular_function; GO:0005488,binding; GO:0043167,ion binding; GO:0043169,cation binding; GO:0003824,catalytic activity; GO:0016829,lyase activity; GO:0016835,carbon-oxygen lyase activity; GO:0016837,carbon-oxygen lyase activity, acting on polysaccharides; GO:0000272,polysaccharide ca…	--	--	--	--
Cluster-27241.62773	--	unknown [Picea sitchensis]	--	A9NSV5_PICSI SubName: Full=Uncharacterized protein {ECO:0000313|EMBL:ABK23716.1};	--	--	--	--	--	--
Cluster-27241.52494	K23327 protein Hikeshi | (RefSeq) uncharacterized protein LOC18439221 (A)	unknown [Picea sitchensis]	--	A9NZ77_PICSI SubName: Full=Uncharacterized protein {ECO:0000313|EMBL:ABK25938.1};	Uncharacterized conserved protein	--	Protein of unknown function (DUF775)	--	--	--
Cluster-27241.50746	K13789 geranylgeranyl diphosphate synthase, type II [EC:2.5.1.1 2.5.1.10 2.5.1.29] | (RefSeq) geranylgeranyl pyrophosphate synthase, chloroplastic-like (A)	geranylgeranyl diphosphate synthase 5 [Picea abies]	GGPP1_ARATH RecName: Full=Heterodimeric geranylgeranyl pyrophosphate synthase large subunit 1, chloroplastic; Short=GGPP synthase 1; Short=GGPS1; EC=2.5.1.-; AltName: Full=(2E,6E)-farnesyl diphosphate synthase 1; AltName: Full=Dimethylallyltranstransferase 1; EC=2.5.1.1; AltName: Full=Farnesyl diphosphate synthase 1; AltName: Full=Farnesyltranstransferase 1; EC=2.5.1.29; AltName: Full=Geranyltran…	C0PRU8_PICSI SubName: Full=Uncharacterized protein {ECO:0000313|EMBL:ACN40538.1};	Geranylgeranyl pyrophosphate synthase/Polyprenyl synthetase	GO:0009507,chloroplast; GO:0005829,cytosol; GO:0009513,etioplast; GO:0009536,plastid; GO:0004161,dimethylallyltranstransferase activity; GO:0004311,farnesyltranstransferase activity; GO:0004337,geranyltranstransferase activity; GO:0046872,metal ion binding; GO:0016117,carotenoid biosynthetic process; GO:0009793,embryo development ending in seed dormancy; GO:0045337,farnesyl diphosphate biosynthet…	Polyprenyl synthetase	--	--	--
Cluster-27241.71120	--	unknown [Picea sitchensis]	NLTP_PINTA RecName: Full=Non-specific lipid-transfer protein; Short=LTP; Flags: Precursor;	A9NJW4_PICSI SubName: Full=Uncharacterized protein {ECO:0000313|EMBL:ABK20925.1};	--	GO:0008289,lipid binding; GO:0006869,lipid transport; GO:0003674,molecular_function; GO:0005488,binding; GO:0006810,transport; GO:0008150,biological_process; GO:0010876,lipid localization; GO:0033036,macromolecule localization; GO:0051179,localization; GO:0051234,establishment of localization; GO:0071702,organic substance transport	Probable lipid transfer	--	--	--
Cluster-27241.89755	K08286 protein-serine/threonine kinase [EC:2.7.11.-] | (RefSeq) hypothetical protein (A)	unknown [Picea sitchensis]	AGC17_ARATH RecName: Full=Serine/threonine-protein kinase AGC1-7 {ECO:0000305}; EC=2.7.11.1 {ECO:0000269|PubMed:16973627}; AltName: Full=AGC serine/threonine-protein kinase subfamily 1 member 7 {ECO:0000303|PubMed:13678909};	A9NPF9_PICSI SubName: Full=Uncharacterized protein {ECO:0000313|EMBL:ABK22520.1};	Putative serine/threonine protein kinase	GO:0005737,cytoplasm; GO:0005634,nucleus; GO:0005886,plasma membrane; GO:0005524,ATP binding; GO:0016301,kinase activity; GO:0004674,protein serine/threonine kinase activity; GO:0035556,intracellular signal transduction; GO:0040008,regulation of growth; GO:0000166,nucleotide binding; GO:0003674,molecular_function; GO:0005488,binding; GO:0008144,drug binding; GO:0017076,purine nucleotide binding; …	Protein kinase domain	--	--	--
Cluster-27241.70316	--	unknown [Picea sitchensis]	--	B8LKC3_PICSI SubName: Full=Uncharacterized protein {ECO:0000313|EMBL:ABR16103.1};	--	GO:0043531,ADP binding; GO:0000166,nucleotide binding; GO:0003674,molecular_function; GO:0005488,binding; GO:0017076,purine nucleotide binding; GO:0030554,adenyl nucleotide binding; GO:0032553,ribonucleotide binding; GO:0032555,purine ribonucleotide binding; GO:0032559,adenyl ribonucleotide binding; GO:0036094,small molecule binding; GO:0043167,ion binding; GO:0043168,anion binding; GO:0097159,or…	Leucine rich repeat	--	--	--
Cluster-27241.76432	K15397 3-ketoacyl-CoA synthase [EC:2.3.1.199] | (RefSeq) 3-ketoacyl-CoA synthase 17-like (A)	PREDICTED: protein RADIALIS-like 3 [Nelumbo nucifera]	RAD_ANTMA RecName: Full=Transcription factor RADIALIS;	A0A1U7ZRZ6_NELNU SubName: Full=protein RADIALIS-like 3 {ECO:0000313|RefSeq:XP_010254802.1};	Zuotin and related molecular chaperones (DnaJ superfamily), contains DNA-binding domains	GO:0005634,nucleus; GO:0003677,DNA binding; GO:0048262,determination of dorsal/ventral asymmetry; GO:0009908,flower development; GO:0006355,regulation of transcription, DNA-templated; GO:0006351,transcription, DNA-templated; GO:0003674,molecular_function; GO:0003676,nucleic acid binding; GO:0005488,binding; GO:0097159,organic cyclic compound binding; GO:1901363,heterocyclic compound binding; GO:0…	--	--	--	--
Cluster-27241.61687	--	unknown [Picea sitchensis]	--	A9NMZ2_PICSI SubName: Full=Uncharacterized protein {ECO:0000313|EMBL:ABK22003.1};	--	GO:0016021,integral component of membrane; GO:0005575,cellular_component; GO:0016020,membrane; GO:0031224,intrinsic component of membrane; GO:0044425,membrane part	Cotton fibre expressed protein	--	--	--
Cluster-27241.65725	K22683 aspartyl protease family protein [EC:3.4.23.-] | (RefSeq) aspartyl protease family protein 2-like (A)	unknown [Picea sitchensis]	ASPA_ARATH RecName: Full=Aspartyl protease family protein At5g10770; EC=3.4.23.- {ECO:0000305}; Flags: Precursor;	B8LKD5_PICSI SubName: Full=Uncharacterized protein {ECO:0000313|EMBL:ABR16115.1};	Aspartyl protease	GO:0031225,anchored component of membrane; GO:0005886,plasma membrane; GO:0004190,aspartic-type endopeptidase activity; GO:0030163,protein catabolic process; GO:0006508,proteolysis; GO:0003674,molecular_function; GO:0003824,catalytic activity; GO:0004175,endopeptidase activity; GO:0008233,peptidase activity; GO:0070011,peptidase activity, acting on L-amino acid peptides; GO:0016787,hydrolase acti…	Xylanase inhibitor N-terminal	--	--	--
Cluster-27241.76421	K13993 HSP20 family protein | (RefSeq) 17.6 kDa class I heat shock protein-like (A)	HSP [Pinus tabuliformis]	HSP17_ARATH RecName: Full=17.4 kDa class I heat shock protein; AltName: Full=17.4 kDa heat shock protein 1; Short=AtHsp17.4A;	A0A0K0M7A4_PINTB SubName: Full=HSP {ECO:0000313|EMBL:AJP06306.1};	Molecular chaperone (small heat-shock protein Hsp26/Hsp42)	GO:0005737,cytoplasm; GO:0009408,response to heat; GO:0006950,response to stress; GO:0008150,biological_process; GO:0009266,response to temperature stimulus; GO:0009628,response to abiotic stimulus; GO:0050896,response to stimulus; GO:0005622,intracellular; GO:0005575,cellular_component; GO:0005623,cell; GO:0044424,intracellular part; GO:0044464,cell part	Hsp20/alpha crystallin family	--	--	--
Cluster-27241.77036	K08867 WNK lysine deficient protein kinase [EC:2.7.11.1] | (RefSeq) probable serine/threonine-protein kinase WNK4 isoform X1 (A)	unknown [Picea sitchensis]	WNK4_ORYSJ RecName: Full=Probable serine/threonine-protein kinase WNK4; Short=OsWNK4; EC=2.7.11.1; AltName: Full=Protein kinase with no lysine 4;	B8LKE0_PICSI SubName: Full=Uncharacterized protein {ECO:0000313|EMBL:ABR16120.1};	Serine/threonine protein kinase	GO:0005829,cytosol; GO:0005524,ATP binding; GO:0004674,protein serine/threonine kinase activity; GO:0035556,intracellular signal transduction; GO:0006468,protein phosphorylation; GO:0000166,nucleotide binding; GO:0003674,molecular_function; GO:0005488,binding; GO:0008144,drug binding; GO:0017076,purine nucleotide binding; GO:0030554,adenyl nucleotide binding; GO:0032553,ribonucleotide binding; GO…	Protein kinase domain	--	--	--
Cluster-27241.71074	--	--	--	--	--	--	--	--	--	--
Cluster-27241.40088	K15397 3-ketoacyl-CoA synthase [EC:2.3.1.199] | (RefSeq) 3-ketoacyl-CoA synthase 6 (A)	3-ketoacyl-CoA synthase 6 [Herrania umbratica]	KCS6_ARATH RecName: Full=3-ketoacyl-CoA synthase 6 {ECO:0000303|PubMed:18465198}; Short=KCS-6 {ECO:0000303|PubMed:18465198}; EC=2.3.1.199 {ECO:0000269|PubMed:10330468}; AltName: Full=Cuticular protein 1 {ECO:0000303|PubMed:10330468}; AltName: Full=Eceriferum 6 {ECO:0000303|PubMed:11041893}; AltName: Full=Very long-chain fatty acid condensing enzyme 6 {ECO:0000303|PubMed:18465198}; Short=VLCFA con…	A0A0D6R3T6_ARACU RecName: Full=3-ketoacyl-CoA synthase {ECO:0000256|PIRNR:PIRNR036417}; EC=2.3.1.- {ECO:0000256|PIRNR:PIRNR036417};	--	GO:0005783,endoplasmic reticulum; GO:0005789,endoplasmic reticulum membrane; GO:0016021,integral component of membrane; GO:0102336,3-oxo-arachidoyl-CoA synthase activity; GO:0102337,3-oxo-cerotoyl-CoA synthase activity; GO:0102338,3-oxo-lignoceronyl-CoA synthase activity; GO:0102756,very-long-chain 3-ketoacyl-CoA synthase activity; GO:0006633,fatty acid biosynthetic process; GO:0009409,response t…	FAE1/Type III polyketide synthase-like protein	--	--	--
Cluster-27241.60061	--	unknown [Picea sitchensis]	--	B8LMT1_PICSI SubName: Full=Uncharacterized protein {ECO:0000313|EMBL:ABR16961.1};	--	--	--	--	--	--
Cluster-27241.72287	K13993 HSP20 family protein | (RefSeq) 22.0 kDa class IV heat shock protein-like (A)	PREDICTED: 22.0 kDa class IV heat shock protein-like [Juglans regia]	HS16A_WHEAT RecName: Full=16.9 kDa class I heat shock protein 1; AltName: Full=HSP 16.9; AltName: Full=Heat shock protein 16.9A; AltName: Full=Heat shock protein 17; AltName: Full=Low molecular weight heat shock protein;	A0A2I4G721_9ROSI SubName: Full=22.0 kDa class IV heat shock protein-like {ECO:0000313|RefSeq:XP_018839694.1};	Molecular chaperone (small heat-shock protein Hsp26/Hsp42)	GO:0005737,cytoplasm; GO:0005622,intracellular; GO:0005575,cellular_component; GO:0005623,cell; GO:0044424,intracellular part; GO:0044464,cell part	Hsp20/alpha crystallin family	--	--	--
Cluster-27241.39717	K13258 2-hydroxyisoflavanone dehydratase [EC:4.2.1.105] | (RefSeq) 2-hydroxyisoflavanone dehydratase (A)	unknown [Picea sitchensis]	CXE6_ARATH RecName: Full=Probable carboxylesterase 6; AltName: Full=AtCXE6; EC=3.1.1.1;	A9P1U1_PICSI SubName: Full=Uncharacterized protein {ECO:0000313|EMBL:ABK26852.1};	Arylacetamide deacetylase	GO:0052689,carboxylic ester hydrolase activity; GO:0016787,hydrolase activity; GO:0009056,catabolic process; GO:0003674,molecular_function; GO:0003824,catalytic activity; GO:0016788,hydrolase activity, acting on ester bonds; GO:0008152,metabolic process; GO:0008150,biological_process	--	--	--	--
Cluster-27241.117834	--	--	--	--	--	--	--	--	--	--
Cluster-27241.71062	K22849 diacylglycerol O-acyltransferase 3, plant [EC:2.3.1.20] | (RefSeq) diacylglycerol O-acyltransferase 3, cytosolic (A)	unknown [Picea sitchensis]	DGAT3_ARATH RecName: Full=Diacylglycerol O-acyltransferase 3, cytosolic {ECO:0000305}; Short=AtDGAT3 {ECO:0000303|PubMed:22760209}; EC=2.3.1.20 {ECO:0000305|PubMed:22760209};	A9NRE5_PICSI SubName: Full=Uncharacterized protein {ECO:0000313|EMBL:ABK23206.1};	--	GO:0005829,cytosol; GO:0004144,diacylglycerol O-acyltransferase activity; GO:0006071,glycerol metabolic process; GO:0019432,triglyceride biosynthetic process; GO:0003674,molecular_function; GO:0003824,catalytic activity; GO:0008374,O-acyltransferase activity; GO:0016411,acylglycerol O-acyltransferase activity; GO:0016740,transferase activity; GO:0016746,transferase activity, transferring acyl gro…	Thioredoxin-like [2Fe-2S] ferredoxin	--	--	--
Cluster-27241.76083	K13993 HSP20 family protein | (RefSeq) small heat shock protein, chloroplastic (A)	unknown [Picea sitchensis]	HS22C_SOYBN RecName: Full=Small heat shock protein, chloroplastic; Flags: Fragment;	C0PSL4_PICSI SubName: Full=Uncharacterized protein {ECO:0000313|EMBL:ACN40804.1};	Molecular chaperone (small heat-shock protein Hsp26/Hsp42)	GO:0009507,chloroplast; GO:0005622,intracellular; GO:0005575,cellular_component; GO:0005623,cell; GO:0005737,cytoplasm; GO:0043231,intracellular membrane-bounded organelle; GO:0009536,plastid; GO:0043226,organelle; GO:0043227,membrane-bounded organelle; GO:0043229,intracellular organelle; GO:0044424,intracellular part; GO:0044444,cytoplasmic part; GO:0044464,cell part	Hsp20/alpha crystallin family	--	--	--
Cluster-27241.60648	--	--	--	--	--	--	--	--	--	--
Cluster-27241.75936	K14638 solute carrier family 15 (peptide/histidine transporter), member 3/4 | (RefSeq) protein NRT1/ PTR FAMILY 8.3 (A)	NPF family transporter [Pinus pinaster]	PTR2_ARATH RecName: Full=Protein NRT1/ PTR FAMILY 8.3; Short=AtNPF8.3; AltName: Full=Histidine-transporting protein; AltName: Full=Peptide transporter PTR2;	A0A1S6YCQ5_PINPS SubName: Full=NPF family transporter {ECO:0000313|EMBL:AQX43154.1};	H+/oligopeptide symporter	GO:0005794,Golgi apparatus; GO:0016021,integral component of membrane; GO:0000325,plant-type vacuole; GO:0009705,plant-type vacuole membrane; GO:0005774,vacuolar membrane; GO:0005773,vacuole; GO:0042936,NA; GO:0015334,high-affinity oligopeptide transmembrane transporter activity; GO:0015197,NA; GO:0042937,tripeptide transmembrane transporter activity; GO:0042938,dipeptide transport; GO:0015833,pe…	POT family	--	--	--
Cluster-27241.66968	K22390 acid phosphatase type 7 | (RefSeq) purple acid phosphatase 18-like (A)	unknown [Picea sitchensis]	PPA18_ARATH RecName: Full=Purple acid phosphatase 18; EC=3.1.3.2; Flags: Precursor;	B8LL20_PICSI RecName: Full=Purple acid phosphatase {ECO:0000256|RuleBase:RU361203}; EC=3.1.3.2 {ECO:0000256|RuleBase:RU361203};	Purple acid phosphatase	GO:0005576,extracellular region; GO:0003993,acid phosphatase activity; GO:0046872,metal ion binding; GO:0003674,molecular_function; GO:0003824,catalytic activity; GO:0016787,hydrolase activity; GO:0016788,hydrolase activity, acting on ester bonds; GO:0016791,phosphatase activity; GO:0042578,phosphoric ester hydrolase activity; GO:0005488,binding; GO:0043167,ion binding; GO:0043169,cation binding;…	Calcineurin-like phosphoesterase	--	--	--
Cluster-27241.66691	K09510 DnaJ homolog subfamily B member 4 | (RefSeq) HSP40/DnaJ peptide-binding (A)	heat shock-like protein [Picea glauca]	JJJ1_ARATH RecName: Full=DNAJ protein JJJ1 homolog {ECO:0000305}; Short=AtJJJ1 {ECO:0000305};	A0A0C9RIH9_9SPER SubName: Full=TSA: Wollemia nobilis Ref_Wollemi_Transcript_16217_1595 transcribed RNA sequence {ECO:0000313|EMBL:JAG86301.1};	Molecular chaperone (DnaJ superfamily)	GO:0005634,nucleus; GO:0003676,nucleic acid binding; GO:0008270,zinc ion binding; GO:0003674,molecular_function; GO:0005488,binding; GO:0097159,organic cyclic compound binding; GO:1901363,heterocyclic compound binding; GO:0046872,metal ion binding; GO:0043167,ion binding; GO:0043169,cation binding; GO:0046914,transition metal ion binding; GO:0005622,intracellular; GO:0005575,cellular_component; G…	DnaJ domain	--	--	--
Cluster-27241.68074	--	--	--	--	--	--	--	--	--	--
Cluster-27241.77943	K02639 ferredoxin | (RefSeq) ferredoxin, root R-B1-like (A)	unknown [Picea sitchensis]	FER3_MAIZE RecName: Full=Ferredoxin-3, chloroplastic; AltName: Full=Ferredoxin III; Short=Fd III; Flags: Precursor;	A9NZI6_PICSI RecName: Full=Ferredoxin {ECO:0000256|RuleBase:RU364001};	--	GO:0009507,chloroplast; GO:0009570,chloroplast stroma; GO:0009578,etioplast stroma; GO:0051537,2 iron, 2 sulfur cluster binding; GO:0009055,electron transfer activity; GO:0046872,metal ion binding; GO:0022900,electron transport chain; GO:0003674,molecular_function; GO:0005488,binding; GO:0048037,cofactor binding; GO:0051536,iron-sulfur cluster binding; GO:0051540,metal cluster binding; GO:0003824…	2Fe-2S iron-sulfur cluster binding domain	--	--	--
Cluster-27241.64533	--	unknown [Picea sitchensis]	--	A9P0A3_PICSI SubName: Full=Uncharacterized protein {ECO:0000313|EMBL:ABK26314.1};	--	--	--	--	--	--
Cluster-27241.65224	K13993 HSP20 family protein | (RefSeq) 17.8 kDa class I heat shock protein-like (A)	HSP [Pinus tabuliformis]	HSP11_DAUCA RecName: Full=17.8 kDa class I heat shock protein; AltName: Full=Clone DCHSP17.7;	A0A0K0M7A4_PINTB SubName: Full=HSP {ECO:0000313|EMBL:AJP06306.1};	Molecular chaperone (small heat-shock protein Hsp26/Hsp42)	GO:0005737,cytoplasm; GO:0005622,intracellular; GO:0005575,cellular_component; GO:0005623,cell; GO:0044424,intracellular part; GO:0044464,cell part	Hsp20/alpha crystallin family	--	--	--
Cluster-27241.94063	--	hypothetical protein 0_6449_01, partial [Pinus taeda]	NINJA_ARATH RecName: Full=AFP homolog 2 {ECO:0000303|PubMed:18484180}; AltName: Full=Novel interactor of JAZ {ECO:0000303|PubMed:20360743};	H9WD81_PINTA SubName: Full=Uncharacterized protein {ECO:0000313|EMBL:AFG59974.1}; Flags: Fragment;	--	GO:0005634,nucleus; GO:0006952,defense response; GO:0009867,jasmonic acid mediated signaling pathway; GO:0045892,negative regulation of transcription, DNA-templated; GO:0009753,response to jasmonic acid; GO:0006351,transcription, DNA-templated; GO:0006950,response to stress; GO:0008150,biological_process; GO:0050896,response to stimulus; GO:0001101,response to acid chemical; GO:0007165,signal tra…	TPL-binding domain in jasmonate signalling	--	--	--
Cluster-27241.82070	--	unknown [Picea sitchensis]	--	A9NMQ5_PICSI SubName: Full=Uncharacterized protein {ECO:0000313|EMBL:ABK21916.1};	Conserved phosducin-like protein	--	Phosducin	--	--	--
Cluster-27241.61938	--	unknown [Picea sitchensis]	--	A9NRJ6_PICSI SubName: Full=Uncharacterized protein {ECO:0000313|EMBL:ABK23257.1};	--	GO:0016021,integral component of membrane; GO:0005575,cellular_component; GO:0016020,membrane; GO:0031224,intrinsic component of membrane; GO:0044425,membrane part	--	--	--	--
Cluster-27241.60731	--	--	--	--	--	--	--	--	--	--
Cluster-27241.63165	K07512 mitochondrial enoyl-[acyl-carrier protein] reductase / trans-2-enoyl-CoA reductase [EC:1.3.1.- 1.3.1.38] | (RefSeq) Trans-2-enoyl-CoA reductase, mitochondrial (A)	unknown [Picea sitchensis]	DJC76_ARATH RecName: Full=Chaperone protein dnaJ C76, chloroplastic {ECO:0000305}; Short=atDjC76 {ECO:0000303|PubMed:23894646}; AltName: Full=AtDjC17 {ECO:0000303|PubMed:25339971}; AltName: Full=AtJ17 {ECO:0000305}; Flags: Precursor;	A9NVK8_PICSI SubName: Full=Uncharacterized protein {ECO:0000313|EMBL:ABK24669.1};	Molecular chaperone (DnaJ superfamily)	GO:0009507,chloroplast; GO:0005622,intracellular; GO:0005575,cellular_component; GO:0005623,cell; GO:0005737,cytoplasm; GO:0043231,intracellular membrane-bounded organelle; GO:0009536,plastid; GO:0043226,organelle; GO:0043227,membrane-bounded organelle; GO:0043229,intracellular organelle; GO:0044424,intracellular part; GO:0044444,cytoplasmic part; GO:0044464,cell part	DnaJ domain	--	--	--
Cluster-27241.53823	K01206 alpha-L-fucosidase [EC:3.2.1.51] | (RefSeq) alpha-L-fucosidase 3 (A)	unknown [Picea sitchensis]	GDL61_ARATH RecName: Full=GDSL esterase/lipase At4g01130; EC=3.1.1.-; AltName: Full=Extracellular lipase At4g01130; Flags: Precursor;	A0A0D6R2X1_ARACU SubName: Full=Uncharacterized protein {ECO:0000313|EMBL:JAG97051.1};	--	GO:0005576,extracellular region; GO:0016788,hydrolase activity, acting on ester bonds; GO:0016042,lipid catabolic process; GO:0003674,molecular_function; GO:0003824,catalytic activity; GO:0016787,hydrolase activity; GO:0008152,metabolic process; GO:0006629,lipid metabolic process; GO:0008150,biological_process; GO:0009056,catabolic process; GO:0044238,primary metabolic process; GO:0071704,organic…	--	--	--	--
Cluster-27241.59053	K13418 somatic embryogenesis receptor kinase 1 [EC:2.7.10.1 2.7.11.1] | (RefSeq) somatic embryogenesis receptor kinase 2 isoform X1 (A)	probable LRR receptor-like serine/threonine-protein kinase At1g56130 [Cucurbita moschata]	Y1561_ARATH RecName: Full=Probable LRR receptor-like serine/threonine-protein kinase At1g56130; EC=2.7.11.1; Flags: Precursor;	A0A1D1XM42_9ARAE SubName: Full=Putative LRR receptor-like serine/threonine-protein kinase At1g56130 {ECO:0000313|EMBL:JAT43462.1}; Flags: Fragment;	--	GO:0016021,integral component of membrane; GO:0005886,plasma membrane; GO:0005524,ATP binding; GO:0004674,protein serine/threonine kinase activity; GO:0000166,nucleotide binding; GO:0003674,molecular_function; GO:0005488,binding; GO:0008144,drug binding; GO:0017076,purine nucleotide binding; GO:0030554,adenyl nucleotide binding; GO:0032553,ribonucleotide binding; GO:0032555,purine ribonucleotide …	Protein kinase domain	--	--	--
Cluster-27241.43237	K08869 aarF domain-containing kinase | (RefSeq) putative aarF domain-containing protein kinase 1 (A)	unknown [Picea sitchensis]	--	A9NYZ8_PICSI SubName: Full=Uncharacterized protein {ECO:0000313|EMBL:ABK25859.1};	Methyltransferase	GO:0008168,methyltransferase activity; GO:0003674,molecular_function; GO:0003824,catalytic activity; GO:0016740,transferase activity; GO:0016741,transferase activity, transferring one-carbon groups	Methyltransferase domain	--	--	--
Cluster-27241.82143	--	unknown [Picea sitchensis]	--	A9NKS2_PICSI SubName: Full=Uncharacterized protein {ECO:0000313|EMBL:ABK21233.1};	--	--	--	--	--	--
Cluster-27241.56386	--	--	--	--	--	--	--	--	--	--
Cluster-27241.84486	K01834 2,3-bisphosphoglycerate-dependent phosphoglycerate mutase [EC:5.4.2.11] | (RefSeq) uncharacterized protein LOC18421990 (A)	unknown [Picea sitchensis]	SERCL_ARATH RecName: Full=Metal-independent phosphoserine phosphatase; Short=iPSP; EC=3.1.3.3 {ECO:0000269|PubMed:22337887}; AltName: Full=Phosphoglycerate mutase-like protein 3 {ECO:0000305};	A9NVC7_PICSI SubName: Full=Uncharacterized protein {ECO:0000313|EMBL:ABK24588.1};	Phosphoglycerate mutase	GO:0005829,cytosol; GO:0016791,phosphatase activity; GO:0004647,phosphoserine phosphatase activity; GO:0070179,D-serine biosynthetic process; GO:0006564,L-serine biosynthetic process; GO:0003674,molecular_function; GO:0003824,catalytic activity; GO:0016787,hydrolase activity; GO:0016788,hydrolase activity, acting on ester bonds; GO:0042578,phosphoric ester hydrolase activity; GO:0008152,metabolic…	Histidine phosphatase superfamily (branch 1)	--	--	--
Cluster-27241.75180	--	unknown [Picea sitchensis]	ELI_PEA RecName: Full=Early light-induced protein, chloroplastic; Short=ELIP; Flags: Precursor;	A9NUK5_PICSI SubName: Full=Uncharacterized protein {ECO:0000313|EMBL:ABK24316.1};	--	GO:0031969,chloroplast membrane; GO:0016021,integral component of membrane; GO:0005622,intracellular; GO:0005575,cellular_component; GO:0016020,membrane; GO:0005623,cell; GO:0005737,cytoplasm; GO:0043231,intracellular membrane-bounded organelle; GO:0009507,chloroplast; GO:0009526,plastid envelope; GO:0009536,plastid; GO:0009941,chloroplast envelope; GO:0031090,organelle membrane; GO:0031967,organ…	--	--	--	--
Cluster-27241.72451	--	PREDICTED: uncharacterized protein LOC105042730 [Elaeis guineensis]	ALB2_PEA RecName: Full=Albumin-2; AltName: Full=PA2;	A0A2H3X0B0_PHODC SubName: Full=uncharacterized protein LOC103696520 {ECO:0000313|RefSeq:XP_008776400.1};	--	GO:0005829,cytosol; GO:0005509,calcium ion binding; GO:0045735,nutrient reservoir activity; GO:0003674,molecular_function; GO:0005488,binding; GO:0046872,metal ion binding; GO:0043167,ion binding; GO:0043169,cation binding; GO:0005622,intracellular; GO:0005575,cellular_component; GO:0005623,cell; GO:0005737,cytoplasm; GO:0044424,intracellular part; GO:0044444,cytoplasmic part; GO:0044464,cell part	Hemopexin	--	--	--
Cluster-27241.49384	K14491 two-component response regulator ARR-B family | (RefSeq) two-component response regulator ORR21 isoform X1 (A)	hypothetical protein AXG93_3228s1230 [Marchantia polymorpha subsp. ruderalis]	ORR22_ORYSI RecName: Full=Two-component response regulator ORR22 {ECO:0000305};	A0A0C9RV56_9SPER SubName: Full=TSA: Wollemia nobilis Ref_Wollemi_Transcript_11459_2238 transcribed RNA sequence {ECO:0000313|EMBL:JAG87734.1};	GATA-4/5/6 transcription factors	GO:0005634,nucleus; GO:0003700,DNA-binding transcription factor activity; GO:0043565,sequence-specific DNA binding; GO:0009736,cytokinin-activated signaling pathway; GO:0000160,phosphorelay signal transduction system; GO:0045893,positive regulation of transcription, DNA-templated; GO:0006351,transcription, DNA-templated; GO:0140110,transcription regulator activity; GO:0003674,molecular_function; …	Response regulator receiver domain	GARP-ARR-B	TF	GARP->GARP-ARR-B
Cluster-27241.52290	K09489 heat shock 70kDa protein 4 | (RefSeq) heat shock 70 kDa protein 8 (A)	PREDICTED: heat shock 70 kDa protein 8 [Elaeis guineensis]	HSP7H_ARATH RecName: Full=Heat shock 70 kDa protein 8; AltName: Full=Heat shock protein 70-8; Short=AtHsp70-8; AltName: Full=Heat-shock protein 70T-2;	A0A0C9S566_9SPER SubName: Full=TSA: Wollemia nobilis Ref_Wollemi_Transcript_21746_2457 transcribed RNA sequence {ECO:0000313|EMBL:JAG85963.1};	Molecular chaperones HSP70/HSC70, HSP70 superfamily	GO:0005524,ATP binding; GO:0009408,response to heat; GO:0009644,response to high light intensity; GO:0042542,response to hydrogen peroxide; GO:0000166,nucleotide binding; GO:0003674,molecular_function; GO:0005488,binding; GO:0008144,drug binding; GO:0017076,purine nucleotide binding; GO:0030554,adenyl nucleotide binding; GO:0032553,ribonucleotide binding; GO:0032555,purine ribonucleotide binding;…	Hsp70 protein	--	--	--
Cluster-27241.66185	K13083 flavonoid 3',5'-hydroxylase [EC:1.14.14.81] | (RefSeq) flavonoid 3',5'-hydroxylase 2-like (A)	unknown [Picea sitchensis]	C75A5_EUSER RecName: Full=Flavonoid 3',5'-hydroxylase; Short=F3'5'H; EC=1.14.13.88; AltName: Full=Cytochrome P450 75A5;	A0A0G7ZNZ0_PICGL SubName: Full=Cytochrome P450 CYP75A14v2 {ECO:0000313|EMBL:JAI17649.1};	Cytochrome P450 CYP2 subfamily	GO:0033772,flavonoid 3',5'-hydroxylase activity; GO:0020037,heme binding; GO:0005506,iron ion binding; GO:0009718,anthocyanin-containing compound biosynthetic process; GO:0003674,molecular_function; GO:0003824,catalytic activity; GO:0004497,monooxygenase activity; GO:0016491,oxidoreductase activity; GO:0016705,oxidoreductase activity, acting on paired donors, with incorporation or reduction of mo…	Cytochrome P450	--	--	--
Cluster-27241.55516	K21989 calcium permeable stress-gated cation channel | (RefSeq) CSC1-like protein ERD4 (A)	PREDICTED: CSC1-like protein ERD4 [Nelumbo nucifera]	CSC1L_BRAJU RecName: Full=CSC1-like protein ERD4; AltName: Full=Protein EARLY-RESPONSIVE TO DEHYDRATION STRESS 4;	A0A0D6QTR2_ARACU SubName: Full=Uncharacterized protein {ECO:0000313|EMBL:JAG93393.1};	Uncharacterized conserved protein	GO:0031969,chloroplast membrane; GO:0016021,integral component of membrane; GO:0006811,ion transport; GO:0006810,transport; GO:0008150,biological_process; GO:0051179,localization; GO:0051234,establishment of localization; GO:0005622,intracellular; GO:0005575,cellular_component; GO:0016020,membrane; GO:0005623,cell; GO:0005737,cytoplasm; GO:0043231,intracellular membrane-bounded organelle; GO:0009…	Calcium-dependent channel, 7TM region, putative phosphate	--	--	--
Cluster-27241.65332	--	unknown [Picea sitchensis]	DAD2_PETHY RecName: Full=Probable strigolactone esterase DAD2; Short=3.1.-.-; AltName: Full=Protein DECREASED APICAL DOMINANCE 2;	A9NP95_PICSI SubName: Full=Uncharacterized protein {ECO:0000313|EMBL:ABK22456.1};	--	GO:0016788,hydrolase activity, acting on ester bonds; GO:0010223,secondary shoot formation; GO:1901601,strigolactone biosynthetic process; GO:0003674,molecular_function; GO:0003824,catalytic activity; GO:0016787,hydrolase activity; GO:0001763,morphogenesis of a branching structure; GO:0007275,multicellular organism development; GO:0009653,anatomical structure morphogenesis; GO:0008150,biological_…	alpha/beta hydrolase fold	--	--	--
Cluster-27241.64747	K13066 caffeic acid 3-O-methyltransferase / acetylserotonin O-methyltransferase [EC:2.1.1.68 2.1.1.4] | (RefSeq) caffeic acid 3-O-methyltransferase (A)	unknown [Picea sitchensis]	COMT1_ZINVI RecName: Full=Caffeic acid 3-O-methyltransferase; Short=CAOMT; Short=COMT; EC=2.1.1.68; AltName: Full=S-adenosysl-L-methionine:caffeic acid 3-O-methyltransferase;	A9NLA6_PICSI SubName: Full=Uncharacterized protein {ECO:0000313|EMBL:ABK21417.1};	Hydroxyindole-O-methyltransferase and related SAM-dependent methyltransferases	GO:0047763,caffeate O-methyltransferase activity; GO:0046983,protein dimerization activity; GO:0009809,lignin biosynthetic process; GO:0003674,molecular_function; GO:0003824,catalytic activity; GO:0008168,methyltransferase activity; GO:0008171,O-methyltransferase activity; GO:0016740,transferase activity; GO:0016741,transferase activity, transferring one-carbon groups; GO:0005515,protein binding;…	O-methyltransferase domain	--	--	--
Cluster-27241.77547	K13161 heterogeneous nuclear ribonucleoprotein R | (RefSeq) heterogeneous nuclear ribonucleoprotein Q-like (A)	PREDICTED: heterogeneous nuclear ribonucleoprotein R-like isoform X1 [Nelumbo nucifera]	HNRPQ_ARATH RecName: Full=Heterogeneous nuclear ribonucleoprotein Q {ECO:0000305}; Short=hnRNP Q {ECO:0000305}; AltName: Full=Protein LHP1-INTERACTING FACTOR 2 {ECO:0000303|PubMed:21304947};	A0A0C9S532_9SPER SubName: Full=TSA: Wollemia nobilis Ref_Wollemi_Transcript_13398_3140 transcribed RNA sequence {ECO:0000313|EMBL:JAG87152.1};	--	GO:0005737,cytoplasm; GO:0005829,cytosol; GO:0005783,endoplasmic reticulum; GO:0005634,nucleus; GO:0003682,chromatin binding; GO:0003729,mRNA binding; GO:0043565,sequence-specific DNA binding; GO:0071395,cellular response to jasmonic acid stimulus; GO:0042742,defense response to bacterium; GO:0050832,defense response to fungus; GO:0045087,innate immune response; GO:0007275,multicellular organism …	RNA recognition motif. (a.k.a. RRM, RBD, or RNP domain)	--	--	--
Cluster-27241.86070	K00411 ubiquinol-cytochrome c reductase iron-sulfur subunit [EC:7.1.1.8] | (RefSeq) cytochrome b-c1 complex subunit Rieske-4, mitochondrial-like (A)	unknown [Picea sitchensis]	UCRI_SOLTU RecName: Full=Cytochrome b-c1 complex subunit Rieske, mitochondrial; EC=1.10.2.2; AltName: Full=Complex III subunit 5; AltName: Full=Rieske iron-sulfur protein; Short=RISP; AltName: Full=Ubiquinol-cytochrome c reductase iron-sulfur subunit; Flags: Precursor;	B8LMH0_PICSI SubName: Full=Uncharacterized protein {ECO:0000313|EMBL:ABR16850.1};	Ubiquinol cytochrome c reductase, subunit RIP1	GO:0016021,integral component of membrane; GO:0005743,mitochondrial inner membrane; GO:0070469,respiratory chain; GO:0051537,2 iron, 2 sulfur cluster binding; GO:0046872,metal ion binding; GO:0008121,ubiquinol-cytochrome-c reductase activity; GO:0003674,molecular_function; GO:0005488,binding; GO:0048037,cofactor binding; GO:0051536,iron-sulfur cluster binding; GO:0051540,metal cluster binding; GO…	Ubiquinol cytochrome reductase transmembrane region	--	--	--
Cluster-27241.76920	K15402 fatty acid omega-hydroxylase [EC:1.14.-.-] | (RefSeq) cytochrome P450 86B1 (A)	unknown [Picea sitchensis]	C86B1_ARATH RecName: Full=Cytochrome P450 86B1; EC=1.14.-.-;	A0A0G7ZP03_PICGL SubName: Full=Cytochrome P450 CYP86N1 {ECO:0000313|EMBL:JAI17714.1};	Cytochrome P450 CYP4/CYP19/CYP26 subfamilies	GO:0005783,endoplasmic reticulum; GO:0005789,endoplasmic reticulum membrane; GO:0016021,integral component of membrane; GO:0020037,heme binding; GO:0005506,iron ion binding; GO:0004497,monooxygenase activity; GO:0016705,oxidoreductase activity, acting on paired donors, with incorporation or reduction of molecular oxygen; GO:0071555,cell wall organization; GO:0010345,suberin biosynthetic process; …	Cytochrome P450	--	--	--
Cluster-27241.61902	K19747 BAHD acyltransferase [EC:2.3.1.-] | (RefSeq) BAHD acyltransferase DCR-like (A)	unknown [Picea sitchensis]	HCT1_ORYSJ RecName: Full=Hydroxycinnamoyltransferase 1 {ECO:0000305}; Short=OsHCT1 {ECO:0000303|PubMed:22285622}; EC=2.3.1.- {ECO:0000305}; AltName: Full=BAHD-like hydroxycinnamoyl transferase HCT1 {ECO:0000305};	B8LQ10_PICSI SubName: Full=Uncharacterized protein {ECO:0000313|EMBL:ABR17740.1};	--	GO:0016747,transferase activity, transferring acyl groups other than amino-acyl groups; GO:0003674,molecular_function; GO:0003824,catalytic activity; GO:0016740,transferase activity; GO:0016746,transferase activity, transferring acyl groups	Transferase family	--	--	--
Cluster-27241.50592	K00574 cyclopropane-fatty-acyl-phospholipid synthase [EC:2.1.1.79] | (RefSeq) uncharacterized protein LOC18447304 isoform X1 (A)	uncharacterized protein LOC18447304 isoform X1 [Amborella trichopoda]	TNMT2_PAPBR RecName: Full=Probable (S)-tetrahydroprotoberberine N-methyltransferase 2; Short=PbTNMT2; EC=2.1.1.122;	U5DET9_AMBTC SubName: Full=Uncharacterized protein {ECO:0000313|EMBL:ERN18933.1};	--	GO:0005737,cytoplasm; GO:0030782,(S)-tetrahydroprotoberberine N-methyltransferase activity; GO:0003674,molecular_function; GO:0003824,catalytic activity; GO:0008168,methyltransferase activity; GO:0008757,S-adenosylmethionine-dependent methyltransferase activity; GO:0016740,transferase activity; GO:0016741,transferase activity, transferring one-carbon groups; GO:0005622,intracellular; GO:0005575,c…	Mycolic acid cyclopropane synthetase	--	--	--
Cluster-27241.54257	K16281 RING-H2 zinc finger protein RHA1 | (RefSeq) E3 ubiquitin-protein ligase RHA1B (A)	hypothetical protein CICLE_v10024600mg [Citrus clementina]	ATL38_ARATH RecName: Full=RING-H2 finger protein ATL38; EC=2.3.2.27 {ECO:0000305}; AltName: Full=RING-type E3 ubiquitin transferase ATL38 {ECO:0000305};	A0A0C9RIE7_9SPER SubName: Full=TSA: Wollemia nobilis Ref_Wollemi_Transcript_17198_659 transcribed RNA sequence {ECO:0000313|EMBL:JAG86266.1};	FOG: Predicted E3 ubiquitin ligase	GO:0016021,integral component of membrane; GO:0046872,metal ion binding; GO:0061630,ubiquitin protein ligase activity; GO:0043161,proteasome-mediated ubiquitin-dependent protein catabolic process; GO:0003674,molecular_function; GO:0005488,binding; GO:0043167,ion binding; GO:0043169,cation binding; GO:0003824,catalytic activity; GO:0004842,ubiquitin-protein transferase activity; GO:0016740,transfe…	Ring finger domain	--	--	--
Cluster-27241.89195	K03695 ATP-dependent Clp protease ATP-binding subunit ClpB | (RefSeq) chaperone protein ClpB3, chloroplastic (A)	unknown [Picea sitchensis]	LEC_MORIN RecName: Full=Galactose-specific lectin {ECO:0000305|PubMed:27664852}; AltName: Full=Jacalin-related lectin {ECO:0000303|PubMed:27664852}; AltName: Full=Mulberry latex galactose-specific lectin {ECO:0000303|PubMed:27664852}; Short=MLGL {ECO:0000303|PubMed:27664852}; Contains: RecName: Full=Galactose-specific lectin, light chain 1 {ECO:0000305|PubMed:27664852}; Contains: RecName: Full=Ga…	A9NLT2_PICSI SubName: Full=Uncharacterized protein {ECO:0000313|EMBL:ABK21593.1};	--	GO:0030246,carbohydrate binding; GO:0003674,molecular_function; GO:0005488,binding	Jacalin-like lectin domain	--	--	--
Cluster-27241.75954	K09755 ferulate-5-hydroxylase [EC:1.14.-.-] | (RefSeq) cytochrome P450 84A1-like (A)	unknown [Picea sitchensis]	C71DA_SOYBN RecName: Full=Cytochrome P450 71D10; EC=1.14.-.-;	C0PQP0_PICSI SubName: Full=Uncharacterized protein {ECO:0000313|EMBL:ACN40130.1};	Cytochrome P450 CYP2 subfamily	GO:0016020,membrane; GO:0020037,heme binding; GO:0005506,iron ion binding; GO:0016709,oxidoreductase activity, acting on paired donors, with incorporation or reduction of molecular oxygen, NAD(P)H as one donor, and incorporation of one atom of oxygen; GO:0044550,secondary metabolite biosynthetic process; GO:0003674,molecular_function; GO:0005488,binding; GO:0046906,tetrapyrrole binding; GO:004803…	Cytochrome P450	--	--	--
Cluster-27241.64711	--	--	--	--	--	--	--	--	--	--
Cluster-27241.29673	K09338 homeobox-leucine zipper protein | (RefSeq) homeobox-leucine zipper protein ROC8 isoform X2 (A)	homeobox-leucine zipper protein ROC8 isoform X2 [Amborella trichopoda]	PDF2_ARATH RecName: Full=Homeobox-leucine zipper protein PROTODERMAL FACTOR 2; AltName: Full=HD-ZIP protein PDF2; AltName: Full=Homeodomain transcription factor PDF2;	A0A0D6QXF5_ARACU SubName: Full=Uncharacterized protein {ECO:0000313|EMBL:JAG96262.1};	--	GO:0005634,nucleus; GO:0003677,DNA binding; GO:0003700,DNA-binding transcription factor activity; GO:0008289,lipid binding; GO:0043565,sequence-specific DNA binding; GO:0048825,cotyledon development; GO:0009913,epidermal cell differentiation; GO:0009845,seed germination; GO:0006351,transcription, DNA-templated; GO:0003674,molecular_function; GO:0003676,nucleic acid binding; GO:0005488,binding; GO…	START domain	HB-HD-ZIP	TF	HB->HB-HD-ZIP
Cluster-27241.70649	--	unknown [Picea sitchensis]	--	B8LN57_PICSI SubName: Full=Uncharacterized protein {ECO:0000313|EMBL:ABR17087.1};	--	GO:0016021,integral component of membrane; GO:0005575,cellular_component; GO:0016020,membrane; GO:0031224,intrinsic component of membrane; GO:0044425,membrane part	--	--	--	--
Cluster-27241.52333	--	--	--	--	--	--	--	--	--	--
Cluster-27241.66805	K13947 auxin efflux carrier family protein | (RefSeq) auxin efflux carrier component 3 (A)	PIN-like auxin efflux carrier [Picea abies]	PIN4_ARATH RecName: Full=Auxin efflux carrier component 4 {ECO:0000303|PubMed:11893337}; Short=AtPIN4 {ECO:0000303|PubMed:11893337};	B5TXD0_PICAB RecName: Full=Auxin efflux carrier component {ECO:0000256|RuleBase:RU362108};	--	GO:0005783,endoplasmic reticulum; GO:0016021,integral component of membrane; GO:0005886,plasma membrane; GO:0010329,auxin efflux transmembrane transporter activity; GO:0010252,auxin homeostasis; GO:0009926,auxin polar transport; GO:0009734,auxin-activated signaling pathway; GO:0048364,root development; GO:0003674,molecular_function; GO:0005215,transporter activity; GO:0022857,transmembrane transp…	Cell division protein CrgA	--	--	--
Cluster-27241.72946	--	PREDICTED: uncharacterized protein LOC105042730 [Elaeis guineensis]	ALB2_PEA RecName: Full=Albumin-2; AltName: Full=PA2;	A0A0K9Q741_SPIOL SubName: Full=Uncharacterized protein {ECO:0000313|EMBL:KNA02972.1};	--	GO:0005829,cytosol; GO:0005509,calcium ion binding; GO:0045735,nutrient reservoir activity; GO:0003674,molecular_function; GO:0005488,binding; GO:0046872,metal ion binding; GO:0043167,ion binding; GO:0043169,cation binding; GO:0005622,intracellular; GO:0005575,cellular_component; GO:0005623,cell; GO:0005737,cytoplasm; GO:0044424,intracellular part; GO:0044444,cytoplasmic part; GO:0044464,cell part	Hemopexin	--	--	--
Cluster-27241.81051	K03283 heat shock 70kDa protein 1/2/6/8 | (RefSeq) heat shock 70 kDa protein 18-like isoform X1 (A)	unknown [Picea sitchensis]	--	A9P0R4_PICSI SubName: Full=Uncharacterized protein {ECO:0000313|EMBL:ABK26475.1};	--	--	C1 domain	--	--	--
Cluster-27241.78543	K03921 acyl-[acyl-carrier-protein] desaturase [EC:1.14.19.2 1.14.19.11 1.14.19.26] | (RefSeq) stearoyl-[acyl-carrier-protein] 9-desaturase, chloroplastic (A)	unknown [Picea sitchensis]	STAD_RICCO RecName: Full=Stearoyl-[acyl-carrier-protein] 9-desaturase, chloroplastic; Short=Stearoyl-ACP desaturase; EC=1.14.19.2 {ECO:0000269|PubMed:17088542, ECO:0000269|PubMed:21930947}; AltName: Full=Acyl-[acyl-carrier-protein] desaturase; AltName: Full=Delta(9) stearoyl-acyl carrier protein desaturase; Flags: Precursor;	A9NVD4_PICSI RecName: Full=Acyl-[acyl-carrier-protein] desaturase {ECO:0000256|RuleBase:RU000582}; EC=1.14.19.- {ECO:0000256|RuleBase:RU000582};	--	GO:0009507,chloroplast; GO:0045300,acyl-[acyl-carrier-protein] desaturase activity; GO:0046872,metal ion binding; GO:0102786,stearoyl-[acp] desaturase activity; GO:0006633,fatty acid biosynthetic process; GO:0003674,molecular_function; GO:0003824,catalytic activity; GO:0016491,oxidoreductase activity; GO:0016705,oxidoreductase activity, acting on paired donors, with incorporation or reduction of …	Fatty acid desaturase	--	--	--
Cluster-27241.70909	K05280 flavonoid 3'-monooxygenase [EC:1.14.14.82] | (RefSeq) flavonoid 3'-monooxygenase (A)	unknown [Picea sitchensis]	F3PH_PETHY RecName: Full=Flavonoid 3'-monooxygenase; EC=1.14.13.21; AltName: Full=Cytochrome P450 75B2; AltName: Full=Flavonoid 3'-hydroxylase;	A0A0G7ZNU2_PICGL SubName: Full=Cytochrome P450 CYP75B13 {ECO:0000313|EMBL:JAI17623.1};	Cytochrome P450 CYP2 subfamily	GO:0005789,endoplasmic reticulum membrane; GO:0016021,integral component of membrane; GO:0016711,flavonoid 3'-monooxygenase activity; GO:0020037,heme binding; GO:0005506,iron ion binding; GO:0009813,flavonoid biosynthetic process; GO:0003674,molecular_function; GO:0003824,catalytic activity; GO:0004497,monooxygenase activity; GO:0016491,oxidoreductase activity; GO:0016705,oxidoreductase activity,…	Cytochrome P450	--	--	--
Cluster-27241.54610	--	unknown [Picea sitchensis]	MARD1_ARATH RecName: Full=Protein MARD1 {ECO:0000303|PubMed:15159630}; AltName: Full=Mediator of ABA-regulated dormancy1 {ECO:0000303|PubMed:15159630}; AltName: Full=Senescence-associated protein SAG102 {ECO:0000303|PubMed:11402199};	A9NNE9_PICSI SubName: Full=Uncharacterized protein {ECO:0000313|EMBL:ABK22160.1};	--	GO:0010494,cytoplasmic stress granule; GO:0000932,P-body; GO:0046872,metal ion binding; GO:0009737,response to abscisic acid; GO:0010162,seed dormancy process; GO:0003674,molecular_function; GO:0005488,binding; GO:0043167,ion binding; GO:0043169,cation binding; GO:0001101,response to acid chemical; GO:0008150,biological_process; GO:0009719,response to endogenous stimulus; GO:0009725,response to h…	zinc-finger of the FCS-type, C2-C2	--	--	--
Cluster-27241.85547	K15404 aldehyde decarbonylase [EC:4.1.99.5] | (RefSeq) CER1-2; hypothetical protein (A)	PREDICTED: protein ECERIFERUM 3 [Vitis vinifera]	CER3_ARATH RecName: Full=Protein ECERIFERUM 3; AltName: Full=Protein FACELESS POLLEN 1; AltName: Full=Protein WAX2; AltName: Full=Protein YORE-YORE;	D7U1J5_VITVI SubName: Full=Uncharacterized protein {ECO:0000313|EMBL:CBI36611.3};	--	GO:0005789,endoplasmic reticulum membrane; GO:0016021,integral component of membrane; GO:0016020,membrane; GO:0005886,plasma membrane; GO:0005506,iron ion binding; GO:0016491,oxidoreductase activity; GO:0043447,alkane biosynthetic process; GO:0042335,cuticle development; GO:0006723,cuticle hydrocarbon biosynthetic process; GO:0008610,lipid biosynthetic process; GO:0006629,lipid metabolic process;…	WAX2 C-terminal domain	--	--	--
Cluster-27241.53459	K08235 xyloglucan:xyloglucosyl transferase [EC:2.4.1.207] | (GenBank) xyloglucan endotransglucosylase/hydrolase family protein (A)	unknown [Picea sitchensis]	XTH9_ARATH RecName: Full=Xyloglucan endotransglucosylase/hydrolase protein 9; Short=At-XTH9; Short=XTH-9; EC=2.4.1.207; Flags: Precursor;	D5A9T0_PICSI RecName: Full=Xyloglucan endotransglucosylase/hydrolase {ECO:0000256|RuleBase:RU361120}; EC=2.4.1.207 {ECO:0000256|RuleBase:RU361120};	--	GO:0048046,apoplast; GO:0005618,cell wall; GO:0004553,hydrolase activity, hydrolyzing O-glycosyl compounds; GO:0016762,xyloglucan:xyloglucosyl transferase activity; GO:0042546,cell wall biogenesis; GO:0071555,cell wall organization; GO:0010411,xyloglucan metabolic process; GO:0003674,molecular_function; GO:0003824,catalytic activity; GO:0016787,hydrolase activity; GO:0016798,hydrolase activity, a…	Glycosyl hydrolases family 16	--	--	--
Cluster-27241.66261	K11275 histone H1/5 | (RefSeq) his1; histone H1 (A)	putative histone H1 [Pinus pinaster]	H1_SOLPN RecName: Full=Histone H1;	Q84L42_PINPS SubName: Full=Putative histone H1 {ECO:0000313|EMBL:CAC84682.1};	--	GO:0000786,nucleosome; GO:0005634,nucleus; GO:0003677,DNA binding; GO:0006334,nucleosome assembly; GO:0003674,molecular_function; GO:0003676,nucleic acid binding; GO:0005488,binding; GO:0097159,organic cyclic compound binding; GO:1901363,heterocyclic compound binding; GO:0051276,chromosome organization; GO:0006333,chromatin assembly or disassembly; GO:0034728,nucleosome organization; GO:0031497,c…	linker histone H1 and H5 family	--	--	--
Cluster-27241.70540	K01412 mitochondrial-processing peptidase subunit alpha [EC:3.4.24.64] | (RefSeq) mitochondrial-processing peptidase subunit alpha-like (A)	unknown [Picea sitchensis]	MPPA_SOLTU RecName: Full=Mitochondrial-processing peptidase subunit alpha; EC=3.4.24.64; AltName: Full=Alpha-MPP; AltName: Full=Ubiquinol-cytochrome-c reductase subunit II; EC=1.10.2.2; Flags: Precursor;	D5ACF4_PICSI SubName: Full=Uncharacterized protein {ECO:0000313|EMBL:ADE77223.1};	Mitochondrial processing peptidase, alpha subunit	GO:0005743,mitochondrial inner membrane; GO:0070469,respiratory chain; GO:0046872,metal ion binding; GO:0004222,metalloendopeptidase activity; GO:0008121,ubiquinol-cytochrome-c reductase activity; GO:0003674,molecular_function; GO:0005488,binding; GO:0043167,ion binding; GO:0043169,cation binding; GO:0003824,catalytic activity; GO:0004175,endopeptidase activity; GO:0008237,metallopeptidase activi…	Insulinase (Peptidase family M16)	--	--	--
Cluster-27241.77758	K01593 aromatic-L-amino-acid/L-tryptophan decarboxylase [EC:4.1.1.28 4.1.1.105] | (GenBank) tyrosine/DOPA decarboxylase (A)	unknown [Picea sitchensis]	--	A9NPV3_PICSI SubName: Full=Uncharacterized protein {ECO:0000313|EMBL:ABK22664.1};	--	--	Protein of unknown function (DUF674)	--	--	--
Cluster-27241.73435	K08237 hydroquinone glucosyltransferase [EC:2.4.1.218] | (RefSeq) hydroquinone glucosyltransferase-like (A)	UDP-glycosyltransferase UGT5d [Picea glauca]	U72B1_ARATH RecName: Full=UDP-glycosyltransferase 72B1; EC=2.4.1.-; AltName: Full=Arbutin synthase; AltName: Full=Probable hydroquinone glucosyltransferase; EC=2.4.1.218;	A0A223PIM8_PICGL RecName: Full=Glycosyltransferase {ECO:0000256|RuleBase:RU362057}; EC=2.4.1.- {ECO:0000256|RuleBase:RU362057};	UDP-glucuronosyl and UDP-glucosyl transferase	GO:0043231,intracellular membrane-bounded organelle; GO:0050505,hydroquinone glucosyltransferase activity; GO:0080043,quercetin 3-O-glucosyltransferase activity; GO:0080044,quercetin 7-O-glucosyltransferase activity; GO:0035251,UDP-glucosyltransferase activity; GO:0008194,UDP-glycosyltransferase activity; GO:0009809,lignin biosynthetic process; GO:0009651,response to salt stress; GO:0009636,respo…	--	--	--	--
Cluster-27241.58517	--	unknown [Picea sitchensis]	--	A9P0A3_PICSI SubName: Full=Uncharacterized protein {ECO:0000313|EMBL:ABK26314.1};	--	--	--	--	--	--
Cluster-27241.37683	--	--	--	--	--	--	--	--	--	--
Cluster-27241.62430	--	unknown [Picea sitchensis]	--	A9NSR1_PICSI SubName: Full=Uncharacterized protein {ECO:0000313|EMBL:ABK23672.1};	--	--	Root cap	--	--	--
Cluster-27241.64068	--	unknown [Picea sitchensis]	--	A9NSU4_PICSI SubName: Full=Uncharacterized protein {ECO:0000313|EMBL:ABK23705.1};	--	GO:0046983,protein dimerization activity; GO:0005515,protein binding; GO:0003674,molecular_function; GO:0005488,binding	--	--	--	--
Cluster-27241.59125	K02138 F-type H+-transporting ATPase subunit d | (RefSeq) ATP synthase subunit d, mitochondrial (A)	unknown [Picea sitchensis]	ATP5H_ARATH RecName: Full=ATP synthase subunit d, mitochondrial; Short=ATPase subunit d;	B8LK90_PICSI RecName: Full=ATP synthase subunit d, mitochondrial {ECO:0000256|PIRNR:PIRNR005514};	Mitochondrial F1F0-ATP synthase, subunit d/ATP7	GO:0009507,chloroplast; GO:0009535,chloroplast thylakoid membrane; GO:0022626,cytosolic ribosome; GO:0005753,mitochondrial proton-transporting ATP synthase complex; GO:0000274,mitochondrial proton-transporting ATP synthase, stator stalk; GO:0005739,mitochondrion; GO:0005730,nucleolus; GO:0042788,polysomal ribosome; GO:0009579,thylakoid; GO:0005774,vacuolar membrane; GO:0005507,copper ion binding;…	ATP synthase D chain, mitochondrial (ATP5H)	--	--	--
Cluster-27241.50444	--	--	--	--	--	--	--	--	--	--
Cluster-27241.71807	K13993 HSP20 family protein | (RefSeq) 18.1 kDa class I heat shock protein-like (A)	HSP [Pinus tabuliformis]	HS181_ARATH RecName: Full=18.1 kDa class I heat shock protein; AltName: Full=18.1 kDa heat shock protein; Short=AtHsp18.1;	A0A0K0M7A4_PINTB SubName: Full=HSP {ECO:0000313|EMBL:AJP06306.1};	Molecular chaperone (small heat-shock protein Hsp26/Hsp42)	GO:0005737,cytoplasm; GO:0010286,heat acclimation; GO:0009408,response to heat; GO:0009644,response to high light intensity; GO:0042542,response to hydrogen peroxide; GO:0006950,response to stress; GO:0008150,biological_process; GO:0009266,response to temperature stimulus; GO:0009628,response to abiotic stimulus; GO:0050896,response to stimulus; GO:0009314,response to radiation; GO:0009416,respon…	--	--	--	--
Cluster-27241.94176	K01177 beta-amylase [EC:3.2.1.2] | (RefSeq) beta-amylase 3, chloroplastic-like (A)	beta-amylase 3, chloroplastic [Olea europaea var. sylvestris]	BAM3_ARATH RecName: Full=Beta-amylase 3, chloroplastic; EC=3.2.1.2; AltName: Full=1,4-alpha-D-glucan maltohydrolase; AltName: Full=Beta-amylase 8; AltName: Full=Chloroplast beta-amylase; Short=CT-BMY; Flags: Precursor;	A0A0C9S133_9SPER RecName: Full=Beta-amylase {ECO:0000256|RuleBase:RU000509}; EC=3.2.1.2 {ECO:0000256|RuleBase:RU000509};	--	GO:0009570,chloroplast stroma; GO:0102229,amylopectin maltohydrolase activity; GO:0016161,beta-amylase activity; GO:0000024,maltose biosynthetic process; GO:0009409,response to cold; GO:0005983,starch catabolic process; GO:0003674,molecular_function; GO:0003824,catalytic activity; GO:0004553,hydrolase activity, hydrolyzing O-glycosyl compounds; GO:0016787,hydrolase activity; GO:0016798,hydrolase …	Glycosyl hydrolase family 14	--	--	--
Cluster-27241.103293	K20628 expansin | (RefSeq) expansin-B3 (A)	expansin B1 [Pinus radiata]	EXB16_ORYSJ RecName: Full=Expansin-B16; AltName: Full=Beta-expansin-16; AltName: Full=OsEXPB16; AltName: Full=OsaEXPb1.14; Flags: Precursor;	A0A1L1ZLU2_PINRA SubName: Full=Expansin B1 {ECO:0000313|EMBL:ALH22543.1};	--	GO:0005618,cell wall; GO:0005576,extracellular region; GO:0016020,membrane; GO:0009506,plasmodesma; GO:0071555,cell wall organization; GO:0019953,sexual reproduction; GO:0006949,syncytium formation; GO:0008150,biological_process; GO:0009987,cellular process; GO:0016043,cellular component organization; GO:0045229,external encapsulating structure organization; GO:0071554,cell wall organization or b…	Pollen allergen	--	--	--
Cluster-27241.96530	K00522 ferritin heavy chain [EC:1.16.3.2] | (RefSeq) ferritin-2, chloroplastic-like (A)	unknown [Picea sitchensis]	FRI3_SOYBN RecName: Full=Ferritin-3, chloroplastic; EC=1.16.3.1; AltName: Full=SFerH-3; Flags: Precursor;	C0PRI0_PICSI RecName: Full=Ferritin {ECO:0000256|RuleBase:RU361145}; EC=1.16.3.1 {ECO:0000256|RuleBase:RU361145};	Ferritin	GO:0009507,chloroplast; GO:0005737,cytoplasm; GO:0008199,ferric iron binding; GO:0004322,ferroxidase activity; GO:0005506,iron ion binding; GO:0006880,intracellular sequestering of iron ion; GO:0006826,iron ion transport; GO:0003674,molecular_function; GO:0005488,binding; GO:0046872,metal ion binding; GO:0043167,ion binding; GO:0043169,cation binding; GO:0046914,transition metal ion binding; GO:0…	Ferritin-like domain	--	--	--
Cluster-27241.75004	K02520 translation initiation factor IF-3 | (RefSeq) translation initiation factor IF-3-like (A)	PREDICTED: uncharacterized protein LOC104603245 [Nelumbo nucifera]	IF32_ARATH RecName: Full=Translation initiation factor IF3-2, chloroplastic {ECO:0000305}; Short=AtIF3-2 {ECO:0000303|PubMed:25630975}; AltName: Full=AtINFC-2 {ECO:0000303|PubMed:25630975}; AltName: Full=Protein SUPPRESSOR OF VARIEGATION 9 {ECO:0000303|PubMed:27535792}; Flags: Precursor;	A0A0D6QZY3_ARACU SubName: Full=Uncharacterized protein {ECO:0000313|EMBL:JAG95578.1};	--	GO:0009507,chloroplast; GO:0043022,ribosome binding; GO:0003743,translation initiation factor activity; GO:0009658,chloroplast organization; GO:0048366,leaf development; GO:0032790,ribosome disassembly; GO:0003674,molecular_function; GO:0005488,binding; GO:0043021,ribonucleoprotein complex binding; GO:0044877,protein-containing complex binding; GO:0003676,nucleic acid binding; GO:0003723,RNA bind…	Translation initiation factor IF-3, N-terminal domain	--	--	--
Cluster-27241.76921	K15402 fatty acid omega-hydroxylase [EC:1.14.-.-] | (RefSeq) cytochrome P450 86B1 (A)	unknown [Picea sitchensis]	C86B1_ARATH RecName: Full=Cytochrome P450 86B1; EC=1.14.-.-;	A0A0G7ZNY5_PICGL SubName: Full=Cytochrome P450 CYP86N2v2 {ECO:0000313|EMBL:JAI17624.1};	Cytochrome P450 CYP4/CYP19/CYP26 subfamilies	GO:0005783,endoplasmic reticulum; GO:0005789,endoplasmic reticulum membrane; GO:0016021,integral component of membrane; GO:0020037,heme binding; GO:0005506,iron ion binding; GO:0004497,monooxygenase activity; GO:0016705,oxidoreductase activity, acting on paired donors, with incorporation or reduction of molecular oxygen; GO:0071555,cell wall organization; GO:0010345,suberin biosynthetic process; …	Cytochrome P450	--	--	--
Cluster-27241.71127	--	unknown [Picea sitchensis]	NLTP_PINTA RecName: Full=Non-specific lipid-transfer protein; Short=LTP; Flags: Precursor;	A9NJW4_PICSI SubName: Full=Uncharacterized protein {ECO:0000313|EMBL:ABK20925.1};	--	GO:0008289,lipid binding; GO:0006869,lipid transport; GO:0003674,molecular_function; GO:0005488,binding; GO:0006810,transport; GO:0008150,biological_process; GO:0010876,lipid localization; GO:0033036,macromolecule localization; GO:0051179,localization; GO:0051234,establishment of localization; GO:0071702,organic substance transport	Probable lipid transfer	--	--	--
Cluster-27241.73950	K02520 translation initiation factor IF-3 | (RefSeq) translation initiation factor IF-3-like (A)	PREDICTED: uncharacterized protein LOC104603245 [Nelumbo nucifera]	IF32_ARATH RecName: Full=Translation initiation factor IF3-2, chloroplastic {ECO:0000305}; Short=AtIF3-2 {ECO:0000303|PubMed:25630975}; AltName: Full=AtINFC-2 {ECO:0000303|PubMed:25630975}; AltName: Full=Protein SUPPRESSOR OF VARIEGATION 9 {ECO:0000303|PubMed:27535792}; Flags: Precursor;	A0A0D6QZY3_ARACU SubName: Full=Uncharacterized protein {ECO:0000313|EMBL:JAG95578.1};	--	GO:0009507,chloroplast; GO:0043022,ribosome binding; GO:0003743,translation initiation factor activity; GO:0009658,chloroplast organization; GO:0048366,leaf development; GO:0032790,ribosome disassembly; GO:0003674,molecular_function; GO:0005488,binding; GO:0043021,ribonucleoprotein complex binding; GO:0044877,protein-containing complex binding; GO:0003676,nucleic acid binding; GO:0003723,RNA bind…	Translation initiation factor IF-3, N-terminal domain	--	--	--
Cluster-27241.30381	K13065 shikimate O-hydroxycinnamoyltransferase [EC:2.3.1.133] | (RefSeq) BAHDb5a-2; BAHD family acyltransferase (A)	hypothetical protein AQUCO_04900147v1 [Aquilegia coerulea]	SHT_ARATH RecName: Full=Spermidine hydroxycinnamoyl transferase; EC=2.3.1.-; AltName: Full=BAHD-like hydroxycinnamoyl transferase;	A0A2G5CK34_AQUCA SubName: Full=Uncharacterized protein {ECO:0000313|EMBL:PIA31644.1};	--	GO:0016410,N-acyltransferase activity; GO:0080074,spermidine:caffeoyl CoA N-acyltransferase activity; GO:0080073,spermidine:coumaroyl CoA N-acyltransferase activity; GO:0080075,spermidine:feruloyl CoA N-acyltransferase activity; GO:0080072,spermidine:sinapoyl CoA N-acyltransferase activity; GO:0009555,pollen development; GO:0010584,pollen exine formation; GO:0080088,spermidine hydroxycinnamate co…	Transferase family	--	--	--
Cluster-27241.65583	K18857 alcohol dehydrogenase class-P [EC:1.1.1.1] | (RefSeq) alcohol dehydrogenase (A)	alcohol dehydrogenase, partial [Pinus banksiana]	ADH_FRAAN RecName: Full=Alcohol dehydrogenase; EC=1.1.1.1 {ECO:0000250|UniProtKB:P06525};	Q43020_PINBN SubName: Full=Alcohol dehydrogenase {ECO:0000313|EMBL:AAC49539.1}; EC=1.1.1.1 {ECO:0000313|EMBL:AAC49539.1}; Flags: Fragment;	Alcohol dehydrogenase, class III	GO:0005737,cytoplasm; GO:0004022,alcohol dehydrogenase (NAD) activity; GO:0008270,zinc ion binding; GO:0003674,molecular_function; GO:0003824,catalytic activity; GO:0016491,oxidoreductase activity; GO:0016614,oxidoreductase activity, acting on CH-OH group of donors; GO:0016616,oxidoreductase activity, acting on the CH-OH group of donors, NAD or NADP as acceptor; GO:0005488,binding; GO:0046872,met…	Zinc-binding dehydrogenase	--	--	--
Cluster-27241.85436	K12173 BRCA1-A complex subunit BRE | (RefSeq) BRISC and BRCA1-A complex member 2 (A)	thaumatin-like protein [Pinus monticola]	TLP_ORYSJ RecName: Full=Thaumatin-like protein; Flags: Precursor;	Q5SFH8_PINMO SubName: Full=Thaumatin-like protein {ECO:0000313|EMBL:AAS85755.1};	--	GO:0005576,extracellular region; GO:0005575,cellular_component	--	--	--	--
Cluster-27241.78253	--	unknown [Picea sitchensis]	--	A9NS50_PICSI SubName: Full=Uncharacterized protein {ECO:0000313|EMBL:ABK23461.1};	--	--	--	--	--	--
Cluster-27241.71804	K13993 HSP20 family protein | (RefSeq) 17.8 kDa class I heat shock protein-like (A)	HSP [Pinus tabuliformis]	HS181_ARATH RecName: Full=18.1 kDa class I heat shock protein; AltName: Full=18.1 kDa heat shock protein; Short=AtHsp18.1;	A0A0K0M7A4_PINTB SubName: Full=HSP {ECO:0000313|EMBL:AJP06306.1};	Molecular chaperone (small heat-shock protein Hsp26/Hsp42)	GO:0005737,cytoplasm; GO:0010286,heat acclimation; GO:0009408,response to heat; GO:0009644,response to high light intensity; GO:0042542,response to hydrogen peroxide; GO:0006950,response to stress; GO:0008150,biological_process; GO:0009266,response to temperature stimulus; GO:0009628,response to abiotic stimulus; GO:0050896,response to stimulus; GO:0009314,response to radiation; GO:0009416,respon…	Hsp20/alpha crystallin family	--	--	--
Cluster-27241.52164	K19525 vacuolar protein sorting-associated protein 13A/C | (RefSeq) uncharacterized protein LOC18443778 (A)	uncharacterized protein LOC18443778 [Amborella trichopoda]	--	U5CZ93_AMBTC SubName: Full=Uncharacterized protein {ECO:0000313|EMBL:ERN15489.1};	Vacuolar protein sorting-associated protein	--	Vacuolar sorting-associated protein 13, N-terminal	--	--	--
Cluster-27241.71778	K00660 chalcone synthase [EC:2.3.1.74] | (RefSeq) chalcone synthase 1-like (A)	chalcone synthase [Pinus pinaster]	CHSY_PINSY RecName: Full=Chalcone synthase; EC=2.3.1.74; AltName: Full=Naringenin-chalcone synthase;	Q7XJC5_PINPS SubName: Full=Chalcone synthase {ECO:0000313|EMBL:AAP85249.1};	--	GO:0016210,naringenin-chalcone synthase activity; GO:0009813,flavonoid biosynthetic process; GO:0003674,molecular_function; GO:0003824,catalytic activity; GO:0016740,transferase activity; GO:0016746,transferase activity, transferring acyl groups; GO:0016747,transferase activity, transferring acyl groups other than amino-acyl groups; GO:0008152,metabolic process; GO:0008150,biological_process; GO:…	Chalcone and stilbene synthases, N-terminal domain	--	--	--
Cluster-27241.49744	--	--	--	--	--	--	--	--	--	--
Cluster-27241.58955	--	unknown [Picea sitchensis]	--	B8LMT1_PICSI SubName: Full=Uncharacterized protein {ECO:0000313|EMBL:ABR16961.1};	--	--	--	--	--	--
Cluster-27241.48612	--	--	--	--	--	--	--	--	--	--
Cluster-27241.71749	K03695 ATP-dependent Clp protease ATP-binding subunit ClpB | (RefSeq) LOW QUALITY PROTEIN: chaperone protein ClpB3, chloroplastic-like (A)	unknown [Picea sitchensis]	JAL3_ARATH RecName: Full=Jacalin-related lectin 3; AltName: Full=Mannose-binding lectin superfamily protein;	A9NR04_PICSI SubName: Full=Uncharacterized protein {ECO:0000313|EMBL:ABK23065.1};	--	GO:0030246,carbohydrate binding; GO:0003674,molecular_function; GO:0005488,binding	Jacalin-like lectin domain	--	--	--
Cluster-27241.71073	K00660 chalcone synthase [EC:2.3.1.74] | (RefSeq) chalcone synthase 1-like (A)	pinocembrin chalcone synthase [Pinus massoniana]	CHS7_PICMA RecName: Full=Chalcone synthase 7; EC=2.3.1.74; AltName: Full=Naregenin-chalcone synthase 7;	T1WVA3_9SPER SubName: Full=Pinocembrin chalcone synthase {ECO:0000313|EMBL:AGU43679.1};	--	GO:0016210,naringenin-chalcone synthase activity; GO:0009813,flavonoid biosynthetic process; GO:0003674,molecular_function; GO:0003824,catalytic activity; GO:0016740,transferase activity; GO:0016746,transferase activity, transferring acyl groups; GO:0016747,transferase activity, transferring acyl groups other than amino-acyl groups; GO:0008152,metabolic process; GO:0008150,biological_process; GO:…	Chalcone and stilbene synthases, N-terminal domain	--	--	--
Cluster-27241.94915	--	unknown [Picea sitchensis]	--	A9P1I8_PICSI SubName: Full=Uncharacterized protein {ECO:0000313|EMBL:ABK26749.1};	--	--	Protein of unknown function, DUF538	--	--	--
Cluster-27241.67431	--	--	--	--	--	--	--	--	--	--
Cluster-27241.88103	--	unknown [Picea sitchensis]	--	A9NYE6_PICSI SubName: Full=Uncharacterized protein {ECO:0000313|EMBL:ABK25657.1};	--	--	--	--	--	--
Cluster-27241.68997	--	--	--	--	--	--	--	--	--	--
Cluster-27241.61050	--	unknown [Picea sitchensis]	MARD1_ARATH RecName: Full=Protein MARD1 {ECO:0000303|PubMed:15159630}; AltName: Full=Mediator of ABA-regulated dormancy1 {ECO:0000303|PubMed:15159630}; AltName: Full=Senescence-associated protein SAG102 {ECO:0000303|PubMed:11402199};	A9NNE9_PICSI SubName: Full=Uncharacterized protein {ECO:0000313|EMBL:ABK22160.1};	--	GO:0010494,cytoplasmic stress granule; GO:0000932,P-body; GO:0046872,metal ion binding; GO:0009737,response to abscisic acid; GO:0010162,seed dormancy process; GO:0003674,molecular_function; GO:0005488,binding; GO:0043167,ion binding; GO:0043169,cation binding; GO:0001101,response to acid chemical; GO:0008150,biological_process; GO:0009719,response to endogenous stimulus; GO:0009725,response to h…	zinc-finger of the FCS-type, C2-C2	--	--	--
Cluster-27241.60028	--	--	--	--	--	--	--	--	--	--
Cluster-27241.73232	K01723 hydroperoxide dehydratase [EC:4.2.1.92] | (RefSeq) allene oxide synthase 1, chloroplastic-like (A)	CYP74A75 [Taxus wallichiana var. chinensis]	CP74_LINUS RecName: Full=Allene oxide synthase, chloroplastic; EC=4.2.1.92; AltName: Full=Cytochrome P450 74A; AltName: Full=Hydroperoxide dehydrase; Flags: Precursor;	A0A0G7ZNX8_PICGL SubName: Full=Cytochrome P450 CYP74A44 {ECO:0000313|EMBL:JAI17718.1};	--	GO:0009507,chloroplast; GO:0020037,heme binding; GO:0047987,hydroperoxide dehydratase activity; GO:0005506,iron ion binding; GO:0004497,monooxygenase activity; GO:0016705,oxidoreductase activity, acting on paired donors, with incorporation or reduction of molecular oxygen; GO:0031408,oxylipin biosynthetic process; GO:0003674,molecular_function; GO:0005488,binding; GO:0046906,tetrapyrrole binding;…	Cytochrome P450	--	--	--
Cluster-27241.33664	K05658 ATP-binding cassette, subfamily B (MDR/TAP), member 1 [EC:7.6.2.2] | (RefSeq) ABC transporter B family member 2 isoform X1 (A)	MDR-like ABC transporter [Ginkgo biloba]	AB2B_ARATH RecName: Full=ABC transporter B family member 2; Short=ABC transporter ABCB.2; Short=AtABCB2; AltName: Full=Multidrug resistance protein 2; AltName: Full=P-glycoprotein 2; Flags: Precursor;	E6Y0T2_GINBI SubName: Full=MDR-like ABC transporter {ECO:0000313|EMBL:ABG75919.1};	Multidrug/pheromone exporter, ABC superfamily	GO:0016021,integral component of membrane; GO:0016020,membrane; GO:0005524,ATP binding; GO:0042626,ATPase activity, coupled to transmembrane movement of substances; GO:0000166,nucleotide binding; GO:0003674,molecular_function; GO:0005488,binding; GO:0008144,drug binding; GO:0017076,purine nucleotide binding; GO:0030554,adenyl nucleotide binding; GO:0032553,ribonucleotide binding; GO:0032555,purin…	ABC transporter transmembrane region	--	--	--
Cluster-27241.31748	K13508 glycerol-3-phosphate acyltransferase [EC:2.3.1.15 2.3.1.198] | (RefSeq) glycerol-3-phosphate 2-O-acyltransferase 6 (A)	unknown [Picea sitchensis]	GPAT6_ARATH RecName: Full=Glycerol-3-phosphate 2-O-acyltransferase 6; Short=AtGPAT6; EC=2.3.1.198; AltName: Full=Glycerol-3-phosphate acyltransferase 6;	A9NXP7_PICSI SubName: Full=Uncharacterized protein {ECO:0000313|EMBL:ABK25408.1};	--	GO:0016021,integral component of membrane; GO:0016020,membrane; GO:0090447,glycerol-3-phosphate 2-O-acyltransferase activity; GO:0016791,phosphatase activity; GO:0102419,sn-2-glycerol-3-phosphate omega-OH-C22:0-CoA acyl transferase activity; GO:0010143,cutin biosynthetic process; GO:0009908,flower development; GO:0008654,phospholipid biosynthetic process; GO:0003674,molecular_function; GO:0003824…	haloacid dehalogenase-like hydrolase	--	--	--
Cluster-27241.65258	K10717 cytokinin trans-hydroxylase | (RefSeq) hypothetical protein (A)	CYP715C54 [Taxus wallichiana var. chinensis]	C7352_ARATH RecName: Full=Cytokinin hydroxylase; EC=1.14.13.-; AltName: Full=Cytochrome P450 35A2;	A0A291FAX9_TAXWC SubName: Full=CYP715C54 {ECO:0000313|EMBL:ATG29943.1};	Cytochrome P450 CYP4/CYP19/CYP26 subfamilies	GO:0016021,integral component of membrane; GO:0009506,plasmodesma; GO:0020037,heme binding; GO:0005506,iron ion binding; GO:0004497,monooxygenase activity; GO:0016705,oxidoreductase activity, acting on paired donors, with incorporation or reduction of molecular oxygen; GO:0033466,trans-zeatin biosynthetic process; GO:0003674,molecular_function; GO:0005488,binding; GO:0046906,tetrapyrrole binding;…	Cytochrome P450	--	--	--
Cluster-27241.67948	K17609 nucleoredoxin [EC:1.8.1.8] | (RefSeq) probable nucleoredoxin 1-1 (A)	--	--	--	--	--	Leucine rich repeat	--	--	--
Cluster-27241.56433	K12472 epidermal growth factor receptor substrate 15 | (RefSeq) GATA zinc finger domain-containing protein 14-like (A)	unknown [Picea sitchensis]	BURP3_ORYSJ RecName: Full=BURP domain-containing protein 3; Short=OsBURP03; Flags: Precursor;	C0PSN2_PICSI SubName: Full=Uncharacterized protein {ECO:0000313|EMBL:ACN40822.1};	--	--	BURP domain	--	--	--
Cluster-27241.85435	K12173 BRCA1-A complex subunit BRE | (RefSeq) BRISC and BRCA1-A complex member 2 (A)	thaumatin-like protein S1 [Pinus monticola]	TLP_ORYSJ RecName: Full=Thaumatin-like protein; Flags: Precursor;	D3IZ11_PINMO SubName: Full=Thaumatin-like protein S1 {ECO:0000313|EMBL:ADB97931.1};	--	GO:0005576,extracellular region; GO:0005575,cellular_component	Thaumatin family	--	--	--
Cluster-27241.59815	K19613 leucine-rich repeat protein SHOC2 | (RefSeq) probable leucine-rich repeat receptor-like protein kinase At1g35710 (A)	PREDICTED: probable LRR receptor-like serine/threonine-protein kinase At3g47570 [Nicotiana attenuata]	Y3471_ARATH RecName: Full=Putative receptor-like protein kinase At3g47110; EC=2.7.11.1; Flags: Precursor;	A0A1S4CTI8_TOBAC SubName: Full=probable LRR receptor-like serine/threonine-protein kinase At3g47570 {ECO:0000313|RefSeq:XP_016504433.1};	--	GO:0016021,integral component of membrane; GO:0005886,plasma membrane; GO:0005524,ATP binding; GO:0004674,protein serine/threonine kinase activity; GO:0000166,nucleotide binding; GO:0003674,molecular_function; GO:0005488,binding; GO:0008144,drug binding; GO:0017076,purine nucleotide binding; GO:0030554,adenyl nucleotide binding; GO:0032553,ribonucleotide binding; GO:0032555,purine ribonucleotide …	Leucine rich repeat	--	--	--
Cluster-27241.32836	--	unknown [Picea sitchensis]	--	A9NQU8_PICSI SubName: Full=Uncharacterized protein {ECO:0000313|EMBL:ABK23009.1};	--	--	--	--	--	--
Cluster-27241.89282	K04708 3-dehydrosphinganine reductase [EC:1.1.1.102] | (RefSeq) 3-dehydrosphinganine reductase TSC10A-like (A)	unknown [Picea sitchensis]	TC10B_ARATH RecName: Full=3-dehydrosphinganine reductase TSC10B; EC=1.1.1.102; AltName: Full=3-ketodihydrosphingosine reductase; Short=KDS reductase; AltName: Full=3-ketosphinganine reductase;	A9NZ20_PICSI SubName: Full=Uncharacterized protein {ECO:0000313|EMBL:ABK25881.1};	Predicted 3-ketosphinganine reductase	GO:0005789,endoplasmic reticulum membrane; GO:0016021,integral component of membrane; GO:0047560,3-dehydrosphinganine reductase activity; GO:0030148,sphingolipid biosynthetic process; GO:0003674,molecular_function; GO:0003824,catalytic activity; GO:0016491,oxidoreductase activity; GO:0016614,oxidoreductase activity, acting on CH-OH group of donors; GO:0016616,oxidoreductase activity, acting on th…	short chain dehydrogenase	--	--	--
Cluster-27241.62683	K08726 soluble epoxide hydrolase / lipid-phosphate phosphatase [EC:3.3.2.10 3.1.3.76] | (RefSeq) epoxide hydrolase A (A)	unknown [Picea sitchensis]	--	A9NKQ4_PICSI SubName: Full=Uncharacterized protein {ECO:0000313|EMBL:ABK21215.1};	Soluble epoxide hydrolase	GO:0003824,catalytic activity; GO:0003674,molecular_function	alpha/beta hydrolase fold	--	--	--
Cluster-27241.63577	--	unknown [Picea sitchensis]	EULS3_ARATH RecName: Full=Ricin B-like lectin EULS3 {ECO:0000305}; AltName: Full=Euonymus lectin S3 {ECO:0000305}; Short=AtEULS3 {ECO:0000303|PubMed:21945438};	A9NRP6_PICSI SubName: Full=Uncharacterized protein {ECO:0000313|EMBL:ABK23307.1};	--	GO:0005737,cytoplasm; GO:0005634,nucleus; GO:0030246,carbohydrate binding; GO:0042742,defense response to bacterium; GO:0090332,stomatal closure; GO:0003674,molecular_function; GO:0005488,binding; GO:0006952,defense response; GO:0006950,response to stress; GO:0008150,biological_process; GO:0009605,response to external stimulus; GO:0009607,response to biotic stimulus; GO:0051707,response to other …	Ricin-type beta-trefoil lectin domain-like	--	--	--
Cluster-27241.65222	K13993 HSP20 family protein | (RefSeq) 18.1 kDa class I heat shock protein-like (A)	HSP [Pinus tabuliformis]	HSP11_DAUCA RecName: Full=17.8 kDa class I heat shock protein; AltName: Full=Clone DCHSP17.7;	A0A0K0M7A4_PINTB SubName: Full=HSP {ECO:0000313|EMBL:AJP06306.1};	Molecular chaperone (small heat-shock protein Hsp26/Hsp42)	GO:0005737,cytoplasm; GO:0005622,intracellular; GO:0005575,cellular_component; GO:0005623,cell; GO:0044424,intracellular part; GO:0044464,cell part	Hsp20/alpha crystallin family	--	--	--
Cluster-27241.105104	--	unknown [Picea sitchensis]	YLS3_ARATH RecName: Full=Protein YLS3; AltName: Full=Protein YELLOW-LEAF-SPECIFIC GENE 3; AltName: Full=Xylogen-like protein 9; Short=AtXYLP9; Flags: Precursor;	A9NQ72_PICSI SubName: Full=Uncharacterized protein {ECO:0000313|EMBL:ABK22783.1};	--	GO:0031225,anchored component of membrane; GO:0005886,plasma membrane; GO:0008289,lipid binding; GO:0006869,lipid transport; GO:0003674,molecular_function; GO:0005488,binding; GO:0006810,transport; GO:0008150,biological_process; GO:0010876,lipid localization; GO:0033036,macromolecule localization; GO:0051179,localization; GO:0051234,establishment of localization; GO:0071702,organic substance tran…	Probable lipid transfer	--	--	--
Cluster-27241.80492	K04078 chaperonin GroES | (RefSeq) 10 kDa chaperonin, mitochondrial-like (A)	unknown [Picea sitchensis]	CH10_ARATH RecName: Full=10 kDa chaperonin, mitochondrial; AltName: Full=Chaperonin 10; Short=CPN10; AltName: Full=Protein groES; Flags: Precursor;	A9NPN9_PICSI SubName: Full=Uncharacterized protein {ECO:0000313|EMBL:ABK22600.1};	Mitochondrial chaperonin	GO:0005759,mitochondrial matrix; GO:0005739,mitochondrion; GO:0005524,ATP binding; GO:0051087,chaperone binding; GO:0005507,copper ion binding; GO:0051082,unfolded protein binding; GO:0051085,chaperone cofactor-dependent protein refolding; GO:0009408,response to heat; GO:0006986,response to unfolded protein; GO:0000166,nucleotide binding; GO:0003674,molecular_function; GO:0005488,binding; GO:0008…	--	--	--	--
Cluster-27241.67237	--	unknown [Picea sitchensis]	--	A9NSV5_PICSI SubName: Full=Uncharacterized protein {ECO:0000313|EMBL:ABK23716.1};	--	--	--	--	--	--
Cluster-27241.49135	K20558 transcription factor SPEECHLESS | (RefSeq) transcription factor SPEECHLESS (A)	unknown [Picea sitchensis]	FAMA_ARATH RecName: Full=Transcription factor FAMA; AltName: Full=Basic helix-loop-helix protein 97; Short=AtbHLH97; Short=bHLH 97; AltName: Full=Transcription factor EN 14; AltName: Full=bHLH transcription factor bHLH097;	B8LLL6_PICSI SubName: Full=Uncharacterized protein {ECO:0000313|EMBL:ABR16546.1};	--	GO:0005634,nucleus; GO:0003677,DNA binding; GO:0003700,DNA-binding transcription factor activity; GO:0046983,protein dimerization activity; GO:0010052,guard cell differentiation; GO:0010377,guard cell fate commitment; GO:0010444,guard mother cell differentiation; GO:0051782,negative regulation of cell division; GO:0061086,negative regulation of histone H3-K27 methylation; GO:0045597,positive regu…	Helix-loop-helix DNA-binding domain	bHLH	TF	bHLH
Cluster-27241.68994	--	--	--	--	--	--	--	--	--	--
Cluster-27241.78329	K01456 peptide-N4-(N-acetyl-beta-glucosaminyl)asparagine amidase [EC:3.5.1.52] | (RefSeq) peptide-N(4)-(N-acetyl-beta- glucosaminyl)asparagine amidase-like (A)	unknown [Picea sitchensis]	ALKR4_ARATH RecName: Full=Probable aldo-keto reductase 4; EC=1.1.1.-;	A9NK40_PICSI SubName: Full=Uncharacterized protein {ECO:0000313|EMBL:ABK21001.1};	Voltage-gated shaker-like K+ channel, subunit beta/KCNAB	GO:0005829,cytosol; GO:0016491,oxidoreductase activity; GO:0046686,response to cadmium ion; GO:0003674,molecular_function; GO:0003824,catalytic activity; GO:0008150,biological_process; GO:0010038,response to metal ion; GO:0010035,response to inorganic substance; GO:0042221,response to chemical; GO:0050896,response to stimulus; GO:0005622,intracellular; GO:0005575,cellular_component; GO:0005623,ce…	Aldo/keto reductase family	--	--	--
Cluster-27241.67728	--	--	--	--	--	--	--	--	--	--
Cluster-27241.65918	--	PREDICTED: protein NUCLEAR FUSION DEFECTIVE 4-like [Erythranthe guttata]	NFD4_ARATH RecName: Full=Protein NUCLEAR FUSION DEFECTIVE 4 {ECO:0000303|PubMed:16698901};	A0A0D6R0Z7_ARACU SubName: Full=Uncharacterized protein {ECO:0000313|EMBL:JAG96479.1};	--	GO:0016021,integral component of membrane; GO:0000741,karyogamy; GO:0010197,polar nucleus fusion; GO:0009651,response to salt stress; GO:0006996,organelle organization; GO:0006997,nucleus organization; GO:0008150,biological_process; GO:0009987,cellular process; GO:0016043,cellular component organization; GO:0048284,organelle fusion; GO:0071840,cellular component organization or biogenesis; GO:000…	Nodulin-like	--	--	--
Cluster-27241.83887	--	--	--	--	--	--	--	--	--	--
Cluster-27241.66003	K09753 cinnamoyl-CoA reductase [EC:1.2.1.44] | (RefSeq) cinnamoyl-CoA reductase 1-like (A)	unknown [Picea sitchensis]	CCR1_ARATH RecName: Full=Cinnamoyl-CoA reductase 1; Short=AtCCR1; EC=1.2.1.44; AltName: Full=Protein IRREGULAR XYLEM 4;	A9NU33_PICSI SubName: Full=Uncharacterized protein {ECO:0000313|EMBL:ABK24144.1};	Flavonol reductase/cinnamoyl-CoA reductase	GO:0005829,cytosol; GO:0016621,cinnamoyl-CoA reductase activity; GO:0050662,coenzyme binding; GO:0007623,circadian rhythm; GO:0009809,lignin biosynthetic process; GO:0009409,response to cold; GO:0003674,molecular_function; GO:0003824,catalytic activity; GO:0016491,oxidoreductase activity; GO:0016620,oxidoreductase activity, acting on the aldehyde or oxo group of donors, NAD or NADP as acceptor; G…	NAD dependent epimerase/dehydratase family	--	--	--
Cluster-27241.55597	K14432 ABA responsive element binding factor | (RefSeq) ABSCISIC ACID-INSENSITIVE 5-like protein 4 (A)	hypothetical protein PHYPA_024839, partial [Physcomitrella patens]	AI5L4_ARATH RecName: Full=ABSCISIC ACID-INSENSITIVE 5-like protein 4; AltName: Full=Abscisic acid responsive elements-binding factor 1; Short=ABRE-binding factor 1; AltName: Full=bZIP transcription factor 35; Short=AtbZIP35;	A0A0C9RQF6_9SPER SubName: Full=TSA: Wollemia nobilis Ref_Wollemi_Transcript_25256_2243 transcribed RNA sequence {ECO:0000313|EMBL:JAG85674.1};	--	GO:0005634,nucleus; GO:0003677,DNA binding; GO:0003700,DNA-binding transcription factor activity; GO:0009738,abscisic acid-activated signaling pathway; GO:0006351,transcription, DNA-templated; GO:0003674,molecular_function; GO:0003676,nucleic acid binding; GO:0005488,binding; GO:0097159,organic cyclic compound binding; GO:1901363,heterocyclic compound binding; GO:0140110,transcription regulator a…	--	--	--	--
Cluster-27241.70840	--	unknown [Picea sitchensis]	CRK27_ARATH RecName: Full=Cysteine-rich receptor-like protein kinase 27; Short=Cysteine-rich RLK27; EC=2.7.11.-; Flags: Precursor;	C0PPW7_PICSI SubName: Full=Uncharacterized protein {ECO:0000313|EMBL:ACN39857.1};	--	GO:0016021,integral component of membrane; GO:0005886,plasma membrane; GO:0005524,ATP binding; GO:0004674,protein serine/threonine kinase activity; GO:0006468,protein phosphorylation; GO:0000166,nucleotide binding; GO:0003674,molecular_function; GO:0005488,binding; GO:0008144,drug binding; GO:0017076,purine nucleotide binding; GO:0030554,adenyl nucleotide binding; GO:0032553,ribonucleotide bindin…	Salt stress response/antifungal	--	--	--
Cluster-27241.72965	K00799 glutathione S-transferase [EC:2.5.1.18] | (RefSeq) hypothetical protein (A)	tau class glutathione S-transferase [Pinus tabuliformis]	GSTXC_TOBAC RecName: Full=Probable glutathione S-transferase parC; EC=2.5.1.18; AltName: Full=Auxin-regulated protein parC;	L7S309_PINTB SubName: Full=Tau class glutathione S-transferase {ECO:0000313|EMBL:AGC13129.1}; EC=2.5.1.18 {ECO:0000313|EMBL:AGC13129.1};	Glutathione S-transferase	GO:0004364,glutathione transferase activity; GO:0009734,auxin-activated signaling pathway; GO:0003674,molecular_function; GO:0003824,catalytic activity; GO:0016740,transferase activity; GO:0016765,transferase activity, transferring alkyl or aryl (other than methyl) groups; GO:0007165,signal transduction; GO:0007154,cell communication; GO:0008150,biological_process; GO:0009719,response to endogeno…	Glutathione S-transferase, N-terminal domain	--	--	--
Cluster-27241.76111	K01166 ribonuclease T2 [EC:4.6.1.19] | (RefSeq) extracellular ribonuclease LE-like (A)	PREDICTED: extracellular ribonuclease LE-like [Phoenix dactylifera]	RNS1_ARATH RecName: Full=Ribonuclease 1; EC=3.1.27.1; Flags: Precursor;	A0A2H3YR59_PHODC SubName: Full=extracellular ribonuclease LE-like {ECO:0000313|RefSeq:XP_008802596.1};	Ribonuclease, T2 family	GO:0005618,cell wall; GO:0005576,extracellular region; GO:0005886,plasma membrane; GO:0004540,ribonuclease activity; GO:0033897,ribonuclease T2 activity; GO:0003723,RNA binding; GO:0009718,anthocyanin-containing compound biosynthetic process; GO:0016036,cellular response to phosphate starvation; GO:0009611,response to wounding; GO:0003674,molecular_function; GO:0003824,catalytic activity; GO:0004…	Ribonuclease T2 family	--	--	--
Cluster-27241.73449	--	--	--	--	--	--	Fn3 associated	--	--	--
Cluster-27241.70136	K14026 SEL1 protein | (RefSeq) ERAD-associated E3 ubiquitin-protein ligase component HRD3A (A)	PREDICTED: ERAD-associated E3 ubiquitin-protein ligase component HRD3A [Vitis vinifera]	HRD3_ORYSJ RecName: Full=ERAD-associated E3 ubiquitin-protein ligase component HRD3 {ECO:0000305}; AltName: Full=OsSel1 {ECO:0000305}; Flags: Precursor;	A0A0C9RNY8_9SPER SubName: Full=TSA: Wollemia nobilis Ref_Wollemi_Transcript_7341_2492 transcribed RNA sequence {ECO:0000313|EMBL:JAG88541.1};	Extracellular protein SEL-1 and related proteins	GO:0005789,endoplasmic reticulum membrane; GO:0016021,integral component of membrane; GO:0005622,intracellular; GO:0005575,cellular_component; GO:0016020,membrane; GO:0005623,cell; GO:0005737,cytoplasm; GO:0005783,endoplasmic reticulum; GO:0043231,intracellular membrane-bounded organelle; GO:0012505,endomembrane system; GO:0031984,organelle subcompartment; GO:0042175,nuclear outer membrane-endopl…	Sel1 repeat	--	--	--
Cluster-27241.60480	K13993 HSP20 family protein | (RefSeq) small heat shock protein, chloroplastic (A)	unknown [Picea sitchensis]	HS22C_SOYBN RecName: Full=Small heat shock protein, chloroplastic; Flags: Fragment;	C0PSL4_PICSI SubName: Full=Uncharacterized protein {ECO:0000313|EMBL:ACN40804.1};	Molecular chaperone (small heat-shock protein Hsp26/Hsp42)	GO:0009507,chloroplast; GO:0005622,intracellular; GO:0005575,cellular_component; GO:0005623,cell; GO:0005737,cytoplasm; GO:0043231,intracellular membrane-bounded organelle; GO:0009536,plastid; GO:0043226,organelle; GO:0043227,membrane-bounded organelle; GO:0043229,intracellular organelle; GO:0044424,intracellular part; GO:0044444,cytoplasmic part; GO:0044464,cell part	Hsp20/alpha crystallin family	--	--	--
Cluster-27241.72364	K14156 choline/ethanolamine kinase [EC:2.7.1.32 2.7.1.82] | (RefSeq) probable choline kinase 2 (A)	unknown [Picea sitchensis]	CK2_ARATH RecName: Full=Probable choline kinase 2; EC=2.7.1.32;	B8LLC2_PICSI SubName: Full=Uncharacterized protein {ECO:0000313|EMBL:ABR16452.1};	Choline kinase	GO:0005524,ATP binding; GO:0004103,choline kinase activity; GO:0000166,nucleotide binding; GO:0003674,molecular_function; GO:0005488,binding; GO:0008144,drug binding; GO:0017076,purine nucleotide binding; GO:0030554,adenyl nucleotide binding; GO:0032553,ribonucleotide binding; GO:0032555,purine ribonucleotide binding; GO:0032559,adenyl ribonucleotide binding; GO:0035639,purine ribonucleoside trip…	Choline/ethanolamine kinase	--	--	--
Cluster-27241.78992	--	unknown [Picea sitchensis]	--	A9NTH6_PICSI SubName: Full=Uncharacterized protein {ECO:0000313|EMBL:ABK23937.1};	--	GO:0010112,regulation of systemic acquired resistance; GO:0002376,immune system process; GO:0002682,regulation of immune system process; GO:0002831,regulation of response to biotic stimulus; GO:0006952,defense response; GO:0006950,response to stress; GO:0006955,immune response; GO:0008150,biological_process; GO:0009605,response to external stimulus; GO:0009607,response to biotic stimulus; GO:0051…	NPR1 interacting	--	--	--
Cluster-27241.71401	--	--	--	--	--	--	--	--	--	--
Cluster-27241.59611	K06910 phosphatidylethanolamine-binding protein | (RefSeq) BFT; phosphatidylethanolamine-binding protein BFT (A)	FT/TFL1-like 2 [Pinus sylvestris]	HD3A_ORYSJ RecName: Full=Protein HEADING DATE 3A; AltName: Full=FT-like protein A;	A0A076L3F0_PINSY SubName: Full=FT/TFL1-like 2 {ECO:0000313|EMBL:AIJ02007.1};	Phosphatidylethanolamine binding protein	GO:0005737,cytoplasm; GO:0005634,nucleus; GO:0008429,phosphatidylethanolamine binding; GO:0030154,cell differentiation; GO:0009908,flower development; GO:0010229,inflorescence development; GO:0009909,regulation of flower development; GO:0048510,regulation of timing of transition from vegetative to reproductive phase; GO:0048572,short-day photoperiodism; GO:0048575,short-day photoperiodism, flower…	Phosphatidylethanolamine-binding protein	--	--	--
Cluster-27241.34522	--	unknown [Picea sitchensis]	PDF1_ARATH RecName: Full=Protodermal factor 1; Flags: Precursor;	D5ADM5_PICSI SubName: Full=Uncharacterized protein {ECO:0000313|EMBL:ADE77644.1};	--	GO:0005576,extracellular region; GO:0005575,cellular_component	--	--	--	--
Cluster-27241.76114	K01166 ribonuclease T2 [EC:4.6.1.19] | (RefSeq) ribonuclease 1 (A)	PREDICTED: ribonuclease 1 [Eucalyptus grandis]	RNS1_ARATH RecName: Full=Ribonuclease 1; EC=3.1.27.1; Flags: Precursor;	A0A2H3YR59_PHODC SubName: Full=extracellular ribonuclease LE-like {ECO:0000313|RefSeq:XP_008802596.1};	Ribonuclease, T2 family	GO:0005618,cell wall; GO:0005576,extracellular region; GO:0005886,plasma membrane; GO:0004540,ribonuclease activity; GO:0033897,ribonuclease T2 activity; GO:0003723,RNA binding; GO:0009718,anthocyanin-containing compound biosynthetic process; GO:0016036,cellular response to phosphate starvation; GO:0009611,response to wounding; GO:0003674,molecular_function; GO:0003824,catalytic activity; GO:0004…	Ribonuclease T2 family	--	--	--
Cluster-27241.70063	K22683 aspartyl protease family protein [EC:3.4.23.-] | (RefSeq) protein ASPARTIC PROTEASE IN GUARD CELL 1 (A)	unknown [Picea sitchensis]	ASPA_ARATH RecName: Full=Aspartyl protease family protein At5g10770; EC=3.4.23.- {ECO:0000305}; Flags: Precursor;	B8LKD5_PICSI SubName: Full=Uncharacterized protein {ECO:0000313|EMBL:ABR16115.1};	Aspartyl protease	GO:0031225,anchored component of membrane; GO:0005886,plasma membrane; GO:0004190,aspartic-type endopeptidase activity; GO:0030163,protein catabolic process; GO:0006508,proteolysis; GO:0003674,molecular_function; GO:0003824,catalytic activity; GO:0004175,endopeptidase activity; GO:0008233,peptidase activity; GO:0070011,peptidase activity, acting on L-amino acid peptides; GO:0016787,hydrolase acti…	Xylanase inhibitor N-terminal	--	--	--
Cluster-27241.56604	K20623 typhasterol/6-deoxotyphasterol 2alpha-hydroxylase | (RefSeq) cytochrome P450 71A1-like (A)	unknown [Picea sitchensis]	C7D55_HYOMU RecName: Full=Premnaspirodiene oxygenase; Short=HPO; EC=1.14.13.121; AltName: Full=Cytochrome P450 71D55;	A0A0K8TTZ9_PICGL SubName: Full=Cytochrome P450 CYP736B9 {ECO:0000313|EMBL:JAI17728.1};	Cytochrome P450 CYP2 subfamily	GO:0016021,integral component of membrane; GO:0020037,heme binding; GO:0005506,iron ion binding; GO:0004497,monooxygenase activity; GO:0016705,oxidoreductase activity, acting on paired donors, with incorporation or reduction of molecular oxygen; GO:0003674,molecular_function; GO:0005488,binding; GO:0046906,tetrapyrrole binding; GO:0048037,cofactor binding; GO:0097159,organic cyclic compound bindi…	Cytochrome P450	--	--	--
Cluster-27241.55054	--	unknown [Picea sitchensis]	--	A9NW33_PICSI SubName: Full=Uncharacterized protein {ECO:0000313|EMBL:ABK24844.1};	--	--	C1 domain	--	--	--
Cluster-27241.33279	--	putative germin-like protein 2-1 [Dendrobium catenatum]	GL13_ORYSJ RecName: Full=Germin-like protein 1-3; AltName: Full=Germin-like protein 8; Short=OsGER8; Flags: Precursor;	A0A2I0W4Z5_9ASPA SubName: Full=Germin-like protein 2-1 {ECO:0000313|EMBL:PKU70731.1};	--	GO:0048046,apoplast; GO:0005618,cell wall; GO:0009506,plasmodesma; GO:0030145,manganese ion binding; GO:0045735,nutrient reservoir activity; GO:0010497,plasmodesmata-mediated intercellular transport; GO:2000280,regulation of root development; GO:0003674,molecular_function; GO:0005488,binding; GO:0046872,metal ion binding; GO:0043167,ion binding; GO:0043169,cation binding; GO:0046914,transition me…	Cupin	--	--	--
Cluster-27241.83730	--	--	--	--	--	--	--	--	--	--
Cluster-27241.51606	K09843 (+)-abscisic acid 8'-hydroxylase [EC:1.14.14.137] | (RefSeq) abscisic acid 8'-hydroxylase 1-like (A)	abscisic acid 8'-hydroxylase 1-like [Hevea brasiliensis]	ABAH1_ARATH RecName: Full=Abscisic acid 8'-hydroxylase 1; Short=ABA 8'-hydroxylase 1; EC=1.14.13.93; AltName: Full=Cytochrome P450 707A1;	A0A0G7ZP25_PICGL SubName: Full=Cytochrome P450 CYP707A46 {ECO:0000313|EMBL:JAI17702.1};	Cytochrome P450 CYP4/CYP19/CYP26 subfamilies	GO:0016021,integral component of membrane; GO:0010295,(+)-abscisic acid 8'-hydroxylase activity; GO:0020037,heme binding; GO:0005506,iron ion binding; GO:0046345,abscisic acid catabolic process; GO:0016132,brassinosteroid biosynthetic process; GO:0010268,brassinosteroid homeostasis; GO:0016125,sterol metabolic process; GO:0003674,molecular_function; GO:0003824,catalytic activity; GO:0004497,monoo…	Cytochrome P450	--	--	--
Cluster-27241.63186	K12173 BRCA1-A complex subunit BRE | (RefSeq) BRISC and BRCA1-A complex member 2 (A)	thaumatin-like protein [Pinus monticola]	TLP_ORYSJ RecName: Full=Thaumatin-like protein; Flags: Precursor;	Q5SFH8_PINMO SubName: Full=Thaumatin-like protein {ECO:0000313|EMBL:AAS85755.1};	--	GO:0005576,extracellular region; GO:0005575,cellular_component	Thaumatin family	--	--	--
Cluster-27241.57085	K12173 BRCA1-A complex subunit BRE | (RefSeq) BRISC and BRCA1-A complex member 2 (A)	thaumatin-like protein S1 [Pinus monticola]	TLP_ORYSJ RecName: Full=Thaumatin-like protein; Flags: Precursor;	D3IZ11_PINMO SubName: Full=Thaumatin-like protein S1 {ECO:0000313|EMBL:ADB97931.1};	--	GO:0005576,extracellular region; GO:0005575,cellular_component	Thaumatin family	--	--	--
Cluster-27241.79944	K06118 UDP-sulfoquinovose synthase [EC:3.13.1.1] | (RefSeq) UDP-sulfoquinovose synthase, chloroplastic (A)	unknown [Picea sitchensis]	SQD1_ARATH RecName: Full=UDP-sulfoquinovose synthase, chloroplastic; EC=3.13.1.1; AltName: Full=Sulfite:UDP-glucose sulfotransferase; AltName: Full=Sulfolipid biosynthesis protein; Flags: Precursor;	B8LLY1_PICSI SubName: Full=Uncharacterized protein {ECO:0000313|EMBL:ABR16661.1};	UDP-glucose 4-epimerase/UDP-sulfoquinovose synthase	GO:0009507,chloroplast; GO:0050662,coenzyme binding; GO:0008146,sulfotransferase activity; GO:0046507,UDPsulfoquinovose synthase activity; GO:0008270,zinc ion binding; GO:0016036,cellular response to phosphate starvation; GO:0009247,glycolipid biosynthetic process; GO:0003674,molecular_function; GO:0005488,binding; GO:0048037,cofactor binding; GO:0003824,catalytic activity; GO:0016740,transferase…	NAD dependent epimerase/dehydratase family	--	--	--
Cluster-27241.66313	--	--	--	--	--	--	--	--	--	--
Cluster-27241.71826	K22849 diacylglycerol O-acyltransferase 3, plant [EC:2.3.1.20] | (RefSeq) diacylglycerol O-acyltransferase 3, cytosolic (A)	unknown [Picea sitchensis]	DGAT3_ARATH RecName: Full=Diacylglycerol O-acyltransferase 3, cytosolic {ECO:0000305}; Short=AtDGAT3 {ECO:0000303|PubMed:22760209}; EC=2.3.1.20 {ECO:0000305|PubMed:22760209};	A9NRE5_PICSI SubName: Full=Uncharacterized protein {ECO:0000313|EMBL:ABK23206.1};	--	GO:0005829,cytosol; GO:0004144,diacylglycerol O-acyltransferase activity; GO:0006071,glycerol metabolic process; GO:0019432,triglyceride biosynthetic process; GO:0003674,molecular_function; GO:0003824,catalytic activity; GO:0008374,O-acyltransferase activity; GO:0016411,acylglycerol O-acyltransferase activity; GO:0016740,transferase activity; GO:0016746,transferase activity, transferring acyl gro…	Thioredoxin-like [2Fe-2S] ferredoxin	--	--	--
Cluster-27241.71887	K01581 ornithine decarboxylase [EC:4.1.1.17] | (RefSeq) ornithine decarboxylase-like (A)	ornithine decarboxylase-like [Momordica charantia]	DCOR_DATST RecName: Full=Ornithine decarboxylase; Short=ODC; EC=4.1.1.17;	W1NKE3_AMBTC SubName: Full=Uncharacterized protein {ECO:0000313|EMBL:ERM96277.1};	Ornithine decarboxylase	GO:0004586,ornithine decarboxylase activity; GO:0033387,putrescine biosynthetic process from ornithine; GO:0003674,molecular_function; GO:0003824,catalytic activity; GO:0016829,lyase activity; GO:0016830,carbon-carbon lyase activity; GO:0016831,carboxy-lyase activity; GO:0008152,metabolic process; GO:0006082,organic acid metabolic process; GO:0006520,cellular amino acid metabolic process; GO:0006…	Pyridoxal-dependent decarboxylase, pyridoxal binding domain	--	--	--
Cluster-27241.76674	K09872 aquaporin PIP | (RefSeq) aquaporin PIP2-7 (A)	unknown [Picea sitchensis]	PIP27_ARATH RecName: Full=Aquaporin PIP2-7; AltName: Full=Plasma membrane intrinsic protein 2-7; Short=AtPIP2;7; AltName: Full=Plasma membrane intrinsic protein 3; AltName: Full=Salt stress-induced major intrinsic protein;	A9NND5_PICSI SubName: Full=Uncharacterized protein {ECO:0000313|EMBL:ABK22146.1};	Aquaporin (major intrinsic protein family)	GO:0046658,anchored component of plasma membrane; GO:0005887,integral component of plasma membrane; GO:0016020,membrane; GO:0005634,nucleus; GO:0005886,plasma membrane; GO:0009506,plasmodesma; GO:0005773,vacuole; GO:0003729,mRNA binding; GO:0015250,water channel activity; GO:0034220,ion transmembrane transport; GO:0009737,response to abscisic acid; GO:0003674,molecular_function; GO:0003676,nuclei…	Major intrinsic protein	--	--	--
Cluster-27241.66269	K04773 protease IV [EC:3.4.21.-] | (GenBank) S49 protease IV family peptidase (A)	PREDICTED: oligopeptide transporter 3 [Elaeis guineensis]	OPT3_ARATH RecName: Full=Oligopeptide transporter 3; Short=AtOPT3;	A0A0C9RPV2_9SPER SubName: Full=TSA: Wollemia nobilis Ref_Wollemi_Transcript_4499_2841 transcribed RNA sequence {ECO:0000313|EMBL:JAG88971.1};	Sexual differentiation process protein ISP4	GO:0016021,integral component of membrane; GO:0016020,membrane; GO:0005886,plasma membrane; GO:0009506,plasmodesma; GO:0046915,transition metal ion transmembrane transporter activity; GO:0006875,cellular metal ion homeostasis; GO:0055072,iron ion homeostasis; GO:0007275,multicellular organism development; GO:0015031,protein transport; GO:1990388,xylem-to-phloem iron transport; GO:0003674,molecula…	OPT oligopeptide transporter protein	--	--	--
Cluster-27241.78060	K13449 pathogenesis-related protein 1 | (RefSeq) PR1; basic form of pathogenesis-related protein 1-like (A)	unknown [Picea sitchensis]	PR1A_TOBAC RecName: Full=Pathogenesis-related protein 1A; Short=PR-1A; Flags: Precursor;	A9NTH5_PICSI SubName: Full=Uncharacterized protein {ECO:0000313|EMBL:ABK23936.1};	Defense-related protein containing SCP domain	GO:0005576,extracellular region; GO:0005773,vacuole; GO:0006952,defense response; GO:0009607,response to biotic stimulus; GO:0006950,response to stress; GO:0008150,biological_process; GO:0050896,response to stimulus; GO:0005575,cellular_component; GO:0005622,intracellular; GO:0005623,cell; GO:0005737,cytoplasm; GO:0043231,intracellular membrane-bounded organelle; GO:0043226,organelle; GO:0043227,…	Cysteine-rich secretory protein family	--	--	--
Cluster-27241.54218	--	--	--	--	--	--	Leucine Rich repeats (2 copies)	--	--	--
Cluster-27241.59449	K12742 isoprene synthase [EC:4.2.3.27] | (RefSeq) hypothetical protein (A)	longifolene synthase [Pinus sylvestris]	TPSLS_PICAB RecName: Full=Longifolene synthase; Short=PaTPS-Lon; EC=4.2.3.58;	B4XAK6_PINSY SubName: Full=Longifolene synthase {ECO:0000313|EMBL:ABV44454.1};	--	GO:0005737,cytoplasm; GO:0000287,magnesium ion binding; GO:0010333,terpene synthase activity; GO:0008152,metabolic process; GO:0003674,molecular_function; GO:0005488,binding; GO:0046872,metal ion binding; GO:0043167,ion binding; GO:0043169,cation binding; GO:0003824,catalytic activity; GO:0016829,lyase activity; GO:0016835,carbon-oxygen lyase activity; GO:0016838,carbon-oxygen lyase activity, act…	Terpene synthase family, metal binding domain	--	--	--
Cluster-27241.65235	K01254 leukotriene-A4 hydrolase [EC:3.3.2.6] | (RefSeq) leukotriene A-4 hydrolase homolog (A)	unknown [Picea sitchensis]	LKHA4_ARATH RecName: Full=Leukotriene A-4 hydrolase homolog; Short=LTA-4 hydrolase; EC=3.3.2.6; AltName: Full=Leukotriene A(4) hydrolase;	D5A828_PICSI SubName: Full=Uncharacterized protein {ECO:0000313|EMBL:ADE75697.1};	Bifunctional leukotriene A4 hydrolase/aminopeptidase LTA4H	GO:0005737,cytoplasm; GO:0005829,cytosol; GO:0004463,leukotriene-A4 hydrolase activity; GO:0070006,metalloaminopeptidase activity; GO:0042277,peptide binding; GO:0008270,zinc ion binding; GO:0019370,leukotriene biosynthetic process; GO:0043171,peptide catabolic process; GO:0006508,proteolysis; GO:0003674,molecular_function; GO:0003824,catalytic activity; GO:0016787,hydrolase activity; GO:0016801,…	Peptidase family M1 domain	--	--	--
Cluster-27241.81233	K16086 (13E)-labda-7,13-dien-15-ol synthase [EC:3.1.7.10] | (RefSeq) hypothetical protein (A)	RecName: Full=Alpha-farnesene synthase AAO61226.1 alpha-farnesene synthase [Pinus taeda]	PT5_PINTA RecName: Full=Alpha-farnesene synthase; EC=4.2.3.46;	A0A0G7ZNS4_PICGL SubName: Full=Putative terpene synthase, PgTPS31 {ECO:0000313|EMBL:JAI17695.1};	--	GO:0005737,cytoplasm; GO:0000287,magnesium ion binding; GO:0010334,sesquiterpene synthase activity; GO:0045338,farnesyl diphosphate metabolic process; GO:0003674,molecular_function; GO:0005488,binding; GO:0046872,metal ion binding; GO:0043167,ion binding; GO:0043169,cation binding; GO:0003824,catalytic activity; GO:0010333,terpene synthase activity; GO:0016829,lyase activity; GO:0016835,carbon-ox…	Terpene synthase family, metal binding domain	--	--	--
Cluster-27241.78448	--	unknown [Picea sitchensis]	--	B8LL54_PICSI SubName: Full=Uncharacterized protein {ECO:0000313|EMBL:ABR16384.1};	FOG: PPR repeat	--	Protein of unknown function (DUF1685)	--	--	--
Cluster-27241.57532	K08695 anthocyanidin reductase [EC:1.3.1.77] | (RefSeq) anthocyanidin reductase (A)	unknown [Picea sitchensis]	ANR_GINBI RecName: Full=Putative anthocyanidin reductase {ECO:0000303|PubMed:16399014}; Short=GbANR {ECO:0000303|PubMed:16399014}; EC=1.3.1.- {ECO:0000250|UniProtKB:Q5FB34};	A9NVF9_PICSI SubName: Full=Uncharacterized protein {ECO:0000313|EMBL:ABK24620.1};	Flavonol reductase/cinnamoyl-CoA reductase	GO:0050662,coenzyme binding; GO:0016491,oxidoreductase activity; GO:0009813,flavonoid biosynthetic process; GO:0003674,molecular_function; GO:0005488,binding; GO:0048037,cofactor binding; GO:0003824,catalytic activity; GO:0008152,metabolic process; GO:0008150,biological_process; GO:0009058,biosynthetic process; GO:0009812,flavonoid metabolic process; GO:0071704,organic substance metabolic process…	NAD dependent epimerase/dehydratase family	--	--	--
Cluster-27241.105785	K13065 shikimate O-hydroxycinnamoyltransferase [EC:2.3.1.133] | (RefSeq) omega-hydroxypalmitate O-feruloyl transferase (A)	unknown [Picea sitchensis]	HHT1_ARATH RecName: Full=Omega-hydroxypalmitate O-feruloyl transferase; EC=2.3.1.188; AltName: Full=Omega-hydroxyacid hydroxycinnamoyltransferase; AltName: Full=Protein ALIPHATIC SUBERIN FERULOYL TRANSFERASE;	A9NVW5_PICSI SubName: Full=Uncharacterized protein {ECO:0000313|EMBL:ABK24776.1};	--	GO:0050734,hydroxycinnamoyltransferase activity; GO:0102406,omega-hydroxypalmitate O-sinapoyl transferase activity; GO:0052325,cell wall pectin biosynthetic process; GO:0010345,suberin biosynthetic process; GO:0003674,molecular_function; GO:0003824,catalytic activity; GO:0016740,transferase activity; GO:0016746,transferase activity, transferring acyl groups; GO:0016747,transferase activity, trans…	Transferase family	--	--	--
Cluster-27241.81413	--	--	--	--	--	--	--	--	--	--
Cluster-27241.63999	K01193 beta-fructofuranosidase [EC:3.2.1.26] | (RefSeq) beta-fructofuranosidase, insoluble isoenzyme 3-like (A)	unknown [Picea sitchensis]	Y3264_ARATH RecName: Full=Putative UPF0481 protein At3g02645;	A9NUU0_PICSI SubName: Full=Uncharacterized protein {ECO:0000313|EMBL:ABK24401.1};	--	GO:0016021,integral component of membrane; GO:0005575,cellular_component; GO:0016020,membrane; GO:0031224,intrinsic component of membrane; GO:0044425,membrane part	Plant protein of unknown function	--	--	--
Cluster-27241.37767	K15397 3-ketoacyl-CoA synthase [EC:2.3.1.199] | (RefSeq) 3-ketoacyl-CoA synthase 17-like (A)	unknown [Picea sitchensis]	RADL6_ARATH RecName: Full=Protein RADIALIS-like 6; Short=AtRL6; Short=Protein RAD-like 6; AltName: Full=Protein RADIALIS-LIKE SANT/MYB 3; Short=Protein RSM3;	D5ADC1_PICSI SubName: Full=Uncharacterized protein {ECO:0000313|EMBL:ADE77540.1};	Zuotin and related molecular chaperones (DnaJ superfamily), contains DNA-binding domains	GO:0005634,nucleus; GO:0003677,DNA binding; GO:0003700,DNA-binding transcription factor activity; GO:0006355,regulation of transcription, DNA-templated; GO:0006351,transcription, DNA-templated; GO:0003674,molecular_function; GO:0003676,nucleic acid binding; GO:0005488,binding; GO:0097159,organic cyclic compound binding; GO:1901363,heterocyclic compound binding; GO:0140110,transcription regulator …	--	MYB-related	TF	MYB->MYB-related
Cluster-27241.47477	K07513 acetyl-CoA acyltransferase 1 [EC:2.3.1.16] | (RefSeq) 3-ketoacyl-CoA thiolase 2, peroxisomal (A)	PREDICTED: 3-ketoacyl-CoA thiolase 2, peroxisomal [Nelumbo nucifera]	THIK2_ARATH RecName: Full=3-ketoacyl-CoA thiolase 2, peroxisomal; EC=2.3.1.16; AltName: Full=Acetyl-CoA acyltransferase 2; AltName: Full=Beta-ketothiolase 2; AltName: Full=Peroxisomal 3-oxoacyl-CoA thiolase 2; AltName: Full=Peroxisome defective protein 1; Flags: Precursor;	A0A0C9SAY4_9SPER SubName: Full=TSA: Wollemia nobilis Ref_Wollemi_Transcript_1486_1890 transcribed RNA sequence {ECO:0000313|EMBL:JAG89428.1};	3-oxoacyl CoA thiolase	GO:0009507,chloroplast; GO:0009514,glyoxysome; GO:0016020,membrane; GO:0005739,mitochondrion; GO:0005730,nucleolus; GO:0005777,peroxisome; GO:0005774,vacuolar membrane; GO:0003988,acetyl-CoA C-acyltransferase activity; GO:0006635,fatty acid beta-oxidation; GO:0010111,glyoxysome organization; GO:0009695,jasmonic acid biosynthetic process; GO:0031408,oxylipin biosynthetic process; GO:0009789,positi…	Thiolase, N-terminal domain	--	--	--
Cluster-27241.50705	--	unknown [Picea sitchensis]	--	A9P083_PICSI SubName: Full=Uncharacterized protein {ECO:0000313|EMBL:ABK26294.1};	--	--	--	--	--	--
Cluster-27241.71833	K22849 diacylglycerol O-acyltransferase 3, plant [EC:2.3.1.20] | (RefSeq) uncharacterized protein LOC105035148 (A)	unknown [Picea sitchensis]	DGAT3_ARATH RecName: Full=Diacylglycerol O-acyltransferase 3, cytosolic {ECO:0000305}; Short=AtDGAT3 {ECO:0000303|PubMed:22760209}; EC=2.3.1.20 {ECO:0000305|PubMed:22760209};	A9NRE5_PICSI SubName: Full=Uncharacterized protein {ECO:0000313|EMBL:ABK23206.1};	--	GO:0005829,cytosol; GO:0004144,diacylglycerol O-acyltransferase activity; GO:0006071,glycerol metabolic process; GO:0019432,triglyceride biosynthetic process; GO:0003674,molecular_function; GO:0003824,catalytic activity; GO:0008374,O-acyltransferase activity; GO:0016411,acylglycerol O-acyltransferase activity; GO:0016740,transferase activity; GO:0016746,transferase activity, transferring acyl gro…	--	--	--	--
Cluster-27241.67165	--	unknown [Picea sitchensis]	NDRP1_ARATH RecName: Full=Nodulin-related protein 1 {ECO:0000303|PubMed:20016941}; Short=AtNRP1 {ECO:0000303|PubMed:20016941}; AltName: Full=RPS2-interacting protein 11 {ECO:0000303|Ref.5};	B8LRD9_PICSI SubName: Full=Uncharacterized protein {ECO:0000313|EMBL:ABR18219.1};	--	GO:0009738,abscisic acid-activated signaling pathway; GO:0006952,defense response; GO:1900426,positive regulation of defense response to bacterium; GO:0009617,response to bacterium; GO:0009409,response to cold; GO:0009408,response to heat; GO:0009651,response to salt stress; GO:0001101,response to acid chemical; GO:0007165,signal transduction; GO:0007154,cell communication; GO:0008150,biological_…	--	--	--	--
Cluster-27241.83111	K19222 1,4-dihydroxy-2-naphthoyl-CoA hydrolase [EC:3.1.2.28] | (RefSeq) 1,4-dihydroxy-2-naphthoyl-CoA thioesterase 1 (A)	unknown [Picea sitchensis]	DNAT1_ARATH RecName: Full=1,4-dihydroxy-2-naphthoyl-CoA thioesterase 1 {ECO:0000303|PubMed:22372525}; Short=AtDHNAT1 {ECO:0000303|PubMed:22372525}; Short=DHNA-CoA thioesterase 1 {ECO:0000303|PubMed:22372525}; EC=3.1.2.- {ECO:0000305};	A9NTZ2_PICSI SubName: Full=Uncharacterized protein {ECO:0000313|EMBL:ABK24103.1};	HGG motif-containing thioesterase	GO:0005777,peroxisome; GO:0016787,hydrolase activity; GO:0042372,phylloquinone biosynthetic process; GO:0051289,protein homotetramerization; GO:0003674,molecular_function; GO:0003824,catalytic activity; GO:0008152,metabolic process; GO:0006732,coenzyme metabolic process; GO:0006766,vitamin metabolic process; GO:0008150,biological_process; GO:0009058,biosynthetic process; GO:0009108,coenzyme biosy…	Thioesterase superfamily	--	--	--
Cluster-27241.70521	K11253 histone H3 | (RefSeq) histone H3-like centromeric protein CNA1 (A)	histone H3-like centromeric protein CNA1 [Helianthus annuus]	H32_ARATH RecName: Full=Histone H3.2; AltName: Full=Histone H3.1;	A0A0V0H9U2_SOLCH SubName: Full=Putative ovule protein {ECO:0000313|EMBL:JAP16775.1};	Histones H3 and H4	GO:0010369,chromocenter; GO:0000786,nucleosome; GO:0005634,nucleus; GO:0031492,nucleosomal DNA binding; GO:0046982,protein heterodimerization activity; GO:0006334,nucleosome assembly; GO:0003674,molecular_function; GO:0003676,nucleic acid binding; GO:0003677,DNA binding; GO:0003682,chromatin binding; GO:0005488,binding; GO:0031490,chromatin DNA binding; GO:0031491,nucleosome binding; GO:0044877,p…	Core histone H2A/H2B/H3/H4	--	--	--
Cluster-27241.66506	K09841 xanthoxin dehydrogenase [EC:1.1.1.288] | (RefSeq) xanthoxin dehydrogenase-like isoform X1 (A)	BSU5 [Pinus tabuliformis]	SDR2A_ARATH RecName: Full=Short-chain dehydrogenase reductase 2a; Short=AtSDR2a; EC=1.1.1.-;	A0A0K0M797_PINTB SubName: Full=BSU5 {ECO:0000313|EMBL:AJP06249.1};	Reductases with broad range of substrate specificities	GO:0016491,oxidoreductase activity; GO:0003674,molecular_function; GO:0003824,catalytic activity	short chain dehydrogenase	--	--	--
Cluster-27241.78764	K00411 ubiquinol-cytochrome c reductase iron-sulfur subunit [EC:7.1.1.8] | (RefSeq) cytochrome b-c1 complex subunit Rieske-4, mitochondrial-like (A)	unknown [Picea sitchensis]	UCRI_SOLTU RecName: Full=Cytochrome b-c1 complex subunit Rieske, mitochondrial; EC=1.10.2.2; AltName: Full=Complex III subunit 5; AltName: Full=Rieske iron-sulfur protein; Short=RISP; AltName: Full=Ubiquinol-cytochrome c reductase iron-sulfur subunit; Flags: Precursor;	B8LMH0_PICSI SubName: Full=Uncharacterized protein {ECO:0000313|EMBL:ABR16850.1};	Ubiquinol cytochrome c reductase, subunit RIP1	GO:0016021,integral component of membrane; GO:0005743,mitochondrial inner membrane; GO:0070469,respiratory chain; GO:0051537,2 iron, 2 sulfur cluster binding; GO:0046872,metal ion binding; GO:0008121,ubiquinol-cytochrome-c reductase activity; GO:0003674,molecular_function; GO:0005488,binding; GO:0048037,cofactor binding; GO:0051536,iron-sulfur cluster binding; GO:0051540,metal cluster binding; GO…	Ubiquinol cytochrome reductase transmembrane region	--	--	--
Cluster-27241.68102	--	unknown [Picea sitchensis]	--	B8LLN3_PICSI SubName: Full=Uncharacterized protein {ECO:0000313|EMBL:ABR16563.1};	--	GO:0016758,transferase activity, transferring hexosyl groups; GO:0008152,metabolic process; GO:0003674,molecular_function; GO:0003824,catalytic activity; GO:0016740,transferase activity; GO:0016757,transferase activity, transferring glycosyl groups; GO:0008150,biological_process	--	--	--	--
Cluster-27241.86447	--	unknown [Picea sitchensis]	--	A9NVJ9_PICSI SubName: Full=Uncharacterized protein {ECO:0000313|EMBL:ABK24660.1};	--	--	Domain of unknown function (DUF1338)	--	--	--
Cluster-27241.71063	K22849 diacylglycerol O-acyltransferase 3, plant [EC:2.3.1.20] | (RefSeq) diacylglycerol O-acyltransferase 3, cytosolic (A)	unknown [Picea sitchensis]	DGAT3_ARATH RecName: Full=Diacylglycerol O-acyltransferase 3, cytosolic {ECO:0000305}; Short=AtDGAT3 {ECO:0000303|PubMed:22760209}; EC=2.3.1.20 {ECO:0000305|PubMed:22760209};	A9NRE5_PICSI SubName: Full=Uncharacterized protein {ECO:0000313|EMBL:ABK23206.1};	--	GO:0005829,cytosol; GO:0004144,diacylglycerol O-acyltransferase activity; GO:0006071,glycerol metabolic process; GO:0019432,triglyceride biosynthetic process; GO:0003674,molecular_function; GO:0003824,catalytic activity; GO:0008374,O-acyltransferase activity; GO:0016411,acylglycerol O-acyltransferase activity; GO:0016740,transferase activity; GO:0016746,transferase activity, transferring acyl gro…	Thioredoxin-like [2Fe-2S] ferredoxin	--	--	--
Cluster-27241.67808	--	disease resistance associated protein, partial [Picea abies]	DRL39_ARATH RecName: Full=Putative disease resistance protein At5g47280;	Q2VWL9_PICAB SubName: Full=Disease resistance associated protein {ECO:0000313|EMBL:AAV34188.1}; Flags: Fragment;	--	GO:0043531,ADP binding; GO:0005524,ATP binding; GO:0006952,defense response; GO:0000166,nucleotide binding; GO:0003674,molecular_function; GO:0005488,binding; GO:0017076,purine nucleotide binding; GO:0030554,adenyl nucleotide binding; GO:0032553,ribonucleotide binding; GO:0032555,purine ribonucleotide binding; GO:0032559,adenyl ribonucleotide binding; GO:0036094,small molecule binding; GO:0043167…	--	--	--	--
Cluster-27241.91152	--	unknown [Picea sitchensis]	--	A9P1K9_PICSI SubName: Full=Uncharacterized protein {ECO:0000313|EMBL:ABK26770.1};	--	--	Protein of unknown function (DUF1499)	--	--	--
Cluster-27241.33239	K15397 3-ketoacyl-CoA synthase [EC:2.3.1.199] | (RefSeq) 3-ketoacyl-CoA synthase 4-like (A)	unknown [Picea sitchensis]	KCS4_ARATH RecName: Full=3-ketoacyl-CoA synthase 4 {ECO:0000303|PubMed:18465198}; Short=KCS-4 {ECO:0000303|PubMed:18465198}; EC=2.3.1.199 {ECO:0000305}; AltName: Full=Very long-chain fatty acid condensing enzyme 4 {ECO:0000303|PubMed:18465198}; Short=VLCFA condensing enzyme 4 {ECO:0000303|PubMed:18465198};	D5A9Z6_PICSI RecName: Full=3-ketoacyl-CoA synthase {ECO:0000256|PIRNR:PIRNR036417}; EC=2.3.1.- {ECO:0000256|PIRNR:PIRNR036417};	--	GO:0016021,integral component of membrane; GO:0102336,3-oxo-arachidoyl-CoA synthase activity; GO:0102337,3-oxo-cerotoyl-CoA synthase activity; GO:0102338,3-oxo-lignoceronyl-CoA synthase activity; GO:0102756,very-long-chain 3-ketoacyl-CoA synthase activity; GO:0006633,fatty acid biosynthetic process; GO:0003674,molecular_function; GO:0003824,catalytic activity; GO:0016740,transferase activity; GO:…	FAE1/Type III polyketide synthase-like protein	--	--	--
Cluster-27241.52238	K24205 protein lifeguard | (RefSeq) BI1-like protein (A)	unknown [Picea sitchensis]	LFG4_ARATH RecName: Full=Protein LIFEGUARD 4 {ECO:0000303|PubMed:23888068}; Short=AtLFG4 {ECO:0000303|PubMed:23888068};	A9P292_PICSI SubName: Full=Uncharacterized protein {ECO:0000313|EMBL:ABK27003.1};	N-methyl-D-aspartate receptor glutamate-binding subunit	GO:0016021,integral component of membrane; GO:0005575,cellular_component; GO:0016020,membrane; GO:0031224,intrinsic component of membrane; GO:0044425,membrane part	Inhibitor of apoptosis-promoting Bax1	--	--	--
Cluster-27241.60244	K11714 rhamnogalacturonan II specific xylosyltransferase [EC:2.4.2.-] | (RefSeq) UDP-D-xylose:L-fucose alpha-1,3-D-xylosyltransferase MGP4-like (A)	unknown [Picea sitchensis]	Y4597_ARATH RecName: Full=Uncharacterized protein At4g15970;	A0A0D6R051_ARACU RecName: Full=Glycosyltransferase {ECO:0000256|RuleBase:RU363055}; EC=2.4.2.- {ECO:0000256|RuleBase:RU363055};	--	GO:0043231,intracellular membrane-bounded organelle; GO:0004519,endonuclease activity; GO:0003723,RNA binding; GO:0009451,RNA modification; GO:0003674,molecular_function; GO:0003824,catalytic activity; GO:0004518,nuclease activity; GO:0016787,hydrolase activity; GO:0016788,hydrolase activity, acting on ester bonds; GO:0003676,nucleic acid binding; GO:0005488,binding; GO:0097159,organic cyclic com…	Nucleotide-diphospho-sugar transferase	--	--	--
Cluster-27241.76619	K01897 long-chain acyl-CoA synthetase [EC:6.2.1.3] | (RefSeq) long chain acyl-CoA synthetase 4 (A)	long-chain acyl-CoA synthetase 4 [Prunus sibirica]	LACS4_ARATH RecName: Full=Long chain acyl-CoA synthetase 4; EC=6.2.1.3;	A0A2H4YCD2_9ROSA SubName: Full=Long-chain acyl-CoA synthetase 4 {ECO:0000313|EMBL:AUD66220.1};	Long-chain acyl-CoA synthetases (AMP-forming)	GO:0005794,Golgi apparatus; GO:0005886,plasma membrane; GO:0005524,ATP binding; GO:0102391,decanoate-CoA ligase activity; GO:0004467,long-chain fatty acid-CoA ligase activity; GO:0006631,fatty acid metabolic process; GO:0000166,nucleotide binding; GO:0003674,molecular_function; GO:0005488,binding; GO:0008144,drug binding; GO:0017076,purine nucleotide binding; GO:0030554,adenyl nucleotide binding;…	AMP-binding enzyme	--	--	--
Cluster-27241.52716	K01728 pectate lyase [EC:4.2.2.2] | (RefSeq) probable pectate lyase 18 (A)	unknown [Picea sitchensis]	PLY20_ARATH RecName: Full=Probable pectate lyase 20; EC=4.2.2.2; Flags: Precursor;	B8LQ36_PICSI RecName: Full=Pectate lyase {ECO:0000256|RuleBase:RU361123}; EC=4.2.2.2 {ECO:0000256|RuleBase:RU361123};	--	GO:0046872,metal ion binding; GO:0030570,pectate lyase activity; GO:0045490,pectin catabolic process; GO:0003674,molecular_function; GO:0005488,binding; GO:0043167,ion binding; GO:0043169,cation binding; GO:0003824,catalytic activity; GO:0016829,lyase activity; GO:0016835,carbon-oxygen lyase activity; GO:0016837,carbon-oxygen lyase activity, acting on polysaccharides; GO:0000272,polysaccharide ca…	Pectate lyase	--	--	--
Cluster-27241.107033	K15406 wax-ester synthase / diacylglycerol O-acyltransferase [EC:2.3.1.75 2.3.1.20] | (RefSeq) O-acyltransferase WSD1-like (A)	unknown [Picea sitchensis]	WSD1_ARATH RecName: Full=O-acyltransferase WSD1; AltName: Full=Diacylglycerol O-acyltransferase; Short=DGAT; EC=2.3.1.20; AltName: Full=Long-chain-alcohol O-fatty-acyltransferase; EC=2.3.1.75; AltName: Full=Wax synthase; Short=WS;	D5A9H1_PICSI SubName: Full=Uncharacterized protein {ECO:0000313|EMBL:ADE76190.1};	--	GO:0005783,endoplasmic reticulum; GO:0005789,endoplasmic reticulum membrane; GO:0016021,integral component of membrane; GO:0005886,plasma membrane; GO:0102966,arachidoyl-CoA:1-dodecanol O-acyltransferase activity; GO:0004144,diacylglycerol O-acyltransferase activity; GO:0047196,long-chain-alcohol O-fatty-acyltransferase activity; GO:0103095,wax ester synthase activity; GO:0019432,triglyceride bio…	Protein of unknown function (DUF1298)	--	--	--
Cluster-27241.72388	--	--	--	--	--	--	--	--	--	--
Cluster-27241.64315	K12472 epidermal growth factor receptor substrate 15 | (RefSeq) GATA zinc finger domain-containing protein 14-like (A)	unknown [Picea sitchensis]	BURP3_ORYSJ RecName: Full=BURP domain-containing protein 3; Short=OsBURP03; Flags: Precursor;	C0PSN2_PICSI SubName: Full=Uncharacterized protein {ECO:0000313|EMBL:ACN40822.1};	--	--	BURP domain	--	--	--
Cluster-27241.64244	K09338 homeobox-leucine zipper protein | (RefSeq) homeobox-leucine zipper protein ATHB-6 (A)	homeobox-leucine zipper protein ATHB-6 [Sesamum indicum]	ATHB5_ARATH RecName: Full=Homeobox-leucine zipper protein ATHB-5; AltName: Full=HD-ZIP protein ATHB-5; AltName: Full=Homeodomain transcription factor ATHB-5;	A0A022QSV2_ERYGU SubName: Full=Uncharacterized protein {ECO:0000313|EMBL:EYU30971.1};	Transcription factor HEX, contains HOX and HALZ domains	GO:0005634,nucleus; GO:0003700,DNA-binding transcription factor activity; GO:0042803,protein homodimerization activity; GO:0043565,sequence-specific DNA binding; GO:0009738,abscisic acid-activated signaling pathway; GO:0045893,positive regulation of transcription, DNA-templated; GO:0009737,response to abscisic acid; GO:0006351,transcription, DNA-templated; GO:0140110,transcription regulator activ…	Homeodomain	HB-HD-ZIP	TF	HB->HB-HD-ZIP
Cluster-27241.81650	K24028 salicylic acid 3-hydroxylase [EC:1.14.11.-] | (RefSeq) protein DMR6-LIKE OXYGENASE 2-like (A)	PREDICTED: protein DMR6-LIKE OXYGENASE 2-like [Ziziphus jujuba]	DLO1_ARATH RecName: Full=Protein DMR6-LIKE OXYGENASE 1 {ECO:0000303|PubMed:25376907}; EC=1.14.11.- {ECO:0000255|PROSITE-ProRule:PRU00805}; AltName: Full=2-oxoglutarate (2OG)-Fe(II) oxygenase-like protein DLO1 {ECO:0000303|PubMed:25376907}; AltName: Full=Protein SENESCENCE-ASSOCIATED GENE 108 {ECO:0000303|PubMed:23959884}; AltName: Full=Salicylate 3-hydroxylase DLO1 {ECO:0000303|PubMed:23959884}; …	A0A0D6QTB2_ARACU SubName: Full=Uncharacterized protein {ECO:0000313|EMBL:JAG93759.1};	Iron/ascorbate family oxidoreductases	GO:0051213,dioxygenase activity; GO:0046872,metal ion binding; GO:0002229,defense response to oomycetes; GO:0010150,leaf senescence; GO:0009617,response to bacterium; GO:0009620,response to fungus; GO:0002239,response to oomycetes; GO:0009751,response to salicylic acid; GO:0046244,salicylic acid catabolic process; GO:0003674,molecular_function; GO:0003824,catalytic activity; GO:0016491,oxidoreduc…	2OG-Fe(II) oxygenase superfamily	--	--	--
Cluster-27241.53012	--	unknown [Picea sitchensis]	--	A9NRP6_PICSI SubName: Full=Uncharacterized protein {ECO:0000313|EMBL:ABK23307.1};	--	--	--	--	--	--
Cluster-27241.61450	K15333 tRNA guanosine-2'-O-methyltransferase [EC:2.1.1.34] | (RefSeq) uncharacterized protein LOC104224633 (A)	PREDICTED: subtilisin-like protease SBT1.1 [Vitis vinifera]	SBT17_ARATH RecName: Full=Subtilisin-like protease SBT1.7 {ECO:0000303|PubMed:16193095}; EC=3.4.21.- {ECO:0000305}; AltName: Full=Cucumisin-like serine protease; AltName: Full=Subtilase subfamily 1 member 7 {ECO:0000303|PubMed:16193095}; Short=AtSBT1.7 {ECO:0000303|PubMed:16193095}; AltName: Full=Subtilisin-like serine protease 1 {ECO:0000303|PubMed:12702015}; Short=At-SLP1 {ECO:0000303|PubMed:12…	F6I361_VITVI SubName: Full=Uncharacterized protein {ECO:0000313|EMBL:CCB61378.1};	--	GO:0048046,apoplast; GO:0005618,cell wall; GO:0005576,extracellular region; GO:0009505,plant-type cell wall; GO:0004252,serine-type endopeptidase activity; GO:0080001,mucilage extrusion from seed coat; GO:0048359,mucilage metabolic process involved in seed coat development; GO:0010214,seed coat development; GO:0003674,molecular_function; GO:0003824,catalytic activity; GO:0004175,endopeptidase act…	Subtilase family	--	--	--
Cluster-27241.81537	--	unknown [Picea sitchensis]	--	B8LMA6_PICSI SubName: Full=Uncharacterized protein {ECO:0000313|EMBL:ABR16786.1};	--	--	--	--	--	--
Cluster-27241.30814	--	--	--	--	--	--	--	--	--	--
Cluster-27241.80128	K08867 WNK lysine deficient protein kinase [EC:2.7.11.1] | (RefSeq) probable serine/threonine-protein kinase WNK4 (A)	unknown [Picea sitchensis]	WNK4_ORYSJ RecName: Full=Probable serine/threonine-protein kinase WNK4; Short=OsWNK4; EC=2.7.11.1; AltName: Full=Protein kinase with no lysine 4;	B8LKE0_PICSI SubName: Full=Uncharacterized protein {ECO:0000313|EMBL:ABR16120.1};	Serine/threonine protein kinase	GO:0005829,cytosol; GO:0005524,ATP binding; GO:0004674,protein serine/threonine kinase activity; GO:0035556,intracellular signal transduction; GO:0006468,protein phosphorylation; GO:0000166,nucleotide binding; GO:0003674,molecular_function; GO:0005488,binding; GO:0008144,drug binding; GO:0017076,purine nucleotide binding; GO:0030554,adenyl nucleotide binding; GO:0032553,ribonucleotide binding; GO…	Protein kinase domain	--	--	--
Cluster-27241.68352	K00430 peroxidase [EC:1.11.1.7] | (RefSeq) peroxidase A2-like isoform X1 (A)	unknown [Picea sitchensis]	PER53_ARATH RecName: Full=Peroxidase 53; Short=Atperox P53; EC=1.11.1.7; AltName: Full=ATPA2; Flags: Precursor;	A9NN21_PICSI RecName: Full=Peroxidase {ECO:0000256|RuleBase:RU362060}; EC=1.11.1.7 {ECO:0000256|RuleBase:RU362060};	--	GO:0005576,extracellular region; GO:0005794,Golgi apparatus; GO:0020037,heme binding; GO:0046872,metal ion binding; GO:0004601,peroxidase activity; GO:0002215,defense response to nematode; GO:0009908,flower development; GO:0042744,hydrogen peroxide catabolic process; GO:0006979,response to oxidative stress; GO:0003674,molecular_function; GO:0005488,binding; GO:0046906,tetrapyrrole binding; GO:004…	Peroxidase	--	--	--
Cluster-27241.51425	K04708 3-dehydrosphinganine reductase [EC:1.1.1.102] | (RefSeq) 3-dehydrosphinganine reductase TSC10A-like (A)	unknown [Picea sitchensis]	TC10B_ARATH RecName: Full=3-dehydrosphinganine reductase TSC10B; EC=1.1.1.102; AltName: Full=3-ketodihydrosphingosine reductase; Short=KDS reductase; AltName: Full=3-ketosphinganine reductase;	A9NZ20_PICSI SubName: Full=Uncharacterized protein {ECO:0000313|EMBL:ABK25881.1};	Predicted 3-ketosphinganine reductase	GO:0005789,endoplasmic reticulum membrane; GO:0016021,integral component of membrane; GO:0047560,3-dehydrosphinganine reductase activity; GO:0030148,sphingolipid biosynthetic process; GO:0003674,molecular_function; GO:0003824,catalytic activity; GO:0016491,oxidoreductase activity; GO:0016614,oxidoreductase activity, acting on CH-OH group of donors; GO:0016616,oxidoreductase activity, acting on th…	short chain dehydrogenase	--	--	--
Cluster-27241.68879	--	unknown [Picea sitchensis]	--	B8LN53_PICSI SubName: Full=Uncharacterized protein {ECO:0000313|EMBL:ABR17083.1};	--	GO:0016021,integral component of membrane; GO:0005575,cellular_component; GO:0016020,membrane; GO:0031224,intrinsic component of membrane; GO:0044425,membrane part	Cotton fibre expressed protein	--	--	--
Cluster-27241.49264	--	unknown [Picea sitchensis]	Y3136_ARATH RecName: Full=Clavaminate synthase-like protein At3g21360; EC=1.-.-.-;	C0PQL6_PICSI SubName: Full=Uncharacterized protein {ECO:0000313|EMBL:ACN40106.1};	--	GO:0005634,nucleus; GO:0046872,metal ion binding; GO:0016491,oxidoreductase activity; GO:0003674,molecular_function; GO:0005488,binding; GO:0043167,ion binding; GO:0043169,cation binding; GO:0003824,catalytic activity; GO:0005622,intracellular; GO:0005575,cellular_component; GO:0005623,cell; GO:0043231,intracellular membrane-bounded organelle; GO:0043226,organelle; GO:0043227,membrane-bounded org…	Taurine catabolism dioxygenase TauD, TfdA family	--	--	--
Cluster-27241.77724	K00891 shikimate kinase [EC:2.7.1.71] | (RefSeq) hypothetical protein (A)	unknown [Picea sitchensis]	SK3_ORYSJ RecName: Full=Shikimate kinase 3, chloroplastic; Short=OsSK3; EC=2.7.1.71; Flags: Precursor;	A9NUN9_PICSI SubName: Full=Uncharacterized protein {ECO:0000313|EMBL:ABK24350.1};	--	GO:0009507,chloroplast; GO:0009536,plastid; GO:0005524,ATP binding; GO:0000287,magnesium ion binding; GO:0004765,shikimate kinase activity; GO:0009073,aromatic amino acid family biosynthetic process; GO:0009423,chorismate biosynthetic process; GO:0019632,shikimate metabolic process; GO:0000166,nucleotide binding; GO:0003674,molecular_function; GO:0005488,binding; GO:0008144,drug binding; GO:00170…	Shikimate kinase	--	--	--
Cluster-27241.70902	K09422 transcription factor MYB, plant | (RefSeq) transcription factor TT2-like (A)	MYB-like protein, partial [Pinus resinosa]	MYB3_ARATH RecName: Full=Transcription factor MYB3; AltName: Full=Myb-related protein 3; Short=AtMYB3;	F8TJT0_PINRE SubName: Full=MYB-like protein {ECO:0000313|EMBL:AEH25774.1}; Flags: Fragment;	Transcription factor, Myb superfamily	GO:0005634,nucleus; GO:0003700,DNA-binding transcription factor activity; GO:0000981,DNA-binding transcription factor activity, RNA polymerase II-specific; GO:0043565,sequence-specific DNA binding; GO:0001135,RNA polymerase II transcription regulator recruiting activity; GO:0044212,transcription regulatory region DNA binding; GO:0030154,cell differentiation; GO:0009800,cinnamic acid biosynthetic …	Myb-like DNA-binding domain	MYB	TF	MYB->MYB
Cluster-27241.33979	--	unknown [Picea sitchensis]	--	A9P0R3_PICSI SubName: Full=Uncharacterized protein {ECO:0000313|EMBL:ABK26474.1};	--	GO:0016021,integral component of membrane; GO:0005575,cellular_component; GO:0016020,membrane; GO:0031224,intrinsic component of membrane; GO:0044425,membrane part	--	--	--	--
Cluster-27241.45535	K05909 laccase [EC:1.10.3.2] | (RefSeq) laccase-6-like (A)	PREDICTED: laccase-6-like [Elaeis guineensis]	LAC4_ORYSJ RecName: Full=Laccase-4; EC=1.10.3.2; AltName: Full=Benzenediol:oxygen oxidoreductase 4; AltName: Full=Diphenol oxidase 4; AltName: Full=Urishiol oxidase 4; Flags: Precursor;	A0A2H3XY46_PHODC RecName: Full=Laccase {ECO:0000256|RuleBase:RU361119}; EC=1.10.3.2 {ECO:0000256|RuleBase:RU361119}; AltName: Full=Benzenediol:oxygen oxidoreductase {ECO:0000256|RuleBase:RU361119}; AltName: Full=Diphenol oxidase {ECO:0000256|RuleBase:RU361119}; AltName: Full=Urishiol oxidase {ECO:0000256|RuleBase:RU361119};	Multicopper oxidases	GO:0048046,apoplast; GO:0005507,copper ion binding; GO:0052716,hydroquinone:oxygen oxidoreductase activity; GO:0016722,oxidoreductase activity, oxidizing metal ions; GO:0046274,lignin catabolic process; GO:0003674,molecular_function; GO:0005488,binding; GO:0046872,metal ion binding; GO:0043167,ion binding; GO:0043169,cation binding; GO:0046914,transition metal ion binding; GO:0003824,catalytic ac…	Multicopper oxidase	--	--	--
Cluster-27241.71095	K03695 ATP-dependent Clp protease ATP-binding subunit ClpB | (RefSeq) LOW QUALITY PROTEIN: chaperone protein ClpB3, chloroplastic-like (A)	unknown [Picea sitchensis]	JAL3_ARATH RecName: Full=Jacalin-related lectin 3; AltName: Full=Mannose-binding lectin superfamily protein;	A9NLT2_PICSI SubName: Full=Uncharacterized protein {ECO:0000313|EMBL:ABK21593.1};	--	GO:0030246,carbohydrate binding; GO:0003674,molecular_function; GO:0005488,binding	Jacalin-like lectin domain	--	--	--
Cluster-27241.32586	K15400 omega-hydroxypalmitate O-feruloyl transferase [EC:2.3.1.188] | (RefSeq) omega-hydroxypalmitate O-feruloyl transferase (A)	unknown [Picea sitchensis]	HHT1_ARATH RecName: Full=Omega-hydroxypalmitate O-feruloyl transferase; EC=2.3.1.188; AltName: Full=Omega-hydroxyacid hydroxycinnamoyltransferase; AltName: Full=Protein ALIPHATIC SUBERIN FERULOYL TRANSFERASE;	A9NVW5_PICSI SubName: Full=Uncharacterized protein {ECO:0000313|EMBL:ABK24776.1};	--	GO:0050734,hydroxycinnamoyltransferase activity; GO:0102406,omega-hydroxypalmitate O-sinapoyl transferase activity; GO:0052325,cell wall pectin biosynthetic process; GO:0010345,suberin biosynthetic process; GO:0003674,molecular_function; GO:0003824,catalytic activity; GO:0016740,transferase activity; GO:0016746,transferase activity, transferring acyl groups; GO:0016747,transferase activity, trans…	Transferase family	--	--	--
Cluster-27241.46222	K19355 mannan endo-1,4-beta-mannosidase [EC:3.2.1.78] | (RefSeq) mannan endo-1,4-beta-mannosidase 6 (A)	PREDICTED: mannan endo-1,4-beta-mannosidase 6 [Nelumbo nucifera]	MAN6_ARATH RecName: Full=Mannan endo-1,4-beta-mannosidase 6; EC=3.2.1.78; AltName: Full=Beta-mannanase 6; AltName: Full=Endo-beta-1,4-mannanase 6; Short=AtMAN6; Flags: Precursor;	A0A0D6R9C9_ARACU SubName: Full=Uncharacterized protein {ECO:0000313|EMBL:JAG98978.1};	--	GO:0005576,extracellular region; GO:0016985,mannan endo-1,4-beta-mannosidase activity; GO:0046355,mannan catabolic process; GO:0009845,seed germination; GO:0003674,molecular_function; GO:0003824,catalytic activity; GO:0004553,hydrolase activity, hydrolyzing O-glycosyl compounds; GO:0004567,beta-mannosidase activity; GO:0015923,mannosidase activity; GO:0016787,hydrolase activity; GO:0016798,hydrol…	Cellulase (glycosyl hydrolase family 5)	--	--	--
Cluster-27241.69342	--	--	--	--	--	--	--	--	--	--
Cluster-27241.48634	K00028 malate dehydrogenase (decarboxylating) [EC:1.1.1.39] | (RefSeq) NAD-dependent malic enzyme 62 kDa isoform, mitochondrial (A)	unknown [Picea sitchensis]	MAOM_SOLTU RecName: Full=NAD-dependent malic enzyme 62 kDa isoform, mitochondrial; Short=NAD-ME; EC=1.1.1.39; Flags: Precursor;	B8LMR7_PICSI RecName: Full=Malic enzyme {ECO:0000256|RuleBase:RU003426};	NADP+-dependent malic enzyme	GO:0005759,mitochondrial matrix; GO:0004471,malate dehydrogenase (decarboxylating) (NAD+) activity; GO:0046872,metal ion binding; GO:0051287,NAD binding; GO:0003674,molecular_function; GO:0003824,catalytic activity; GO:0004470,malic enzyme activity; GO:0016491,oxidoreductase activity; GO:0016614,oxidoreductase activity, acting on CH-OH group of donors; GO:0016615,malate dehydrogenase activity; GO…	Malic enzyme, NAD binding domain	--	--	--
Cluster-27241.100785	K13415 protein brassinosteroid insensitive 1 [EC:2.7.10.1 2.7.11.1] | (RefSeq) systemin receptor SR160 isoform X2 (A)	unknown [Picea sitchensis]	Y5838_ARATH RecName: Full=Probably inactive leucine-rich repeat receptor-like protein kinase At5g48380; Flags: Precursor;	B8LK76_PICSI SubName: Full=Uncharacterized protein {ECO:0000313|EMBL:ABR16056.1};	--	GO:0016021,integral component of membrane; GO:0005886,plasma membrane; GO:0009506,plasmodesma; GO:0005524,ATP binding; GO:0016301,kinase activity; GO:0004672,protein kinase activity; GO:0033612,receptor serine/threonine kinase binding; GO:0042742,defense response to bacterium; GO:0060548,negative regulation of cell death; GO:0031348,negative regulation of defense response; GO:0000166,nucleotide b…	Protein tyrosine kinase	--	--	--
Cluster-27241.82444	K00026 malate dehydrogenase [EC:1.1.1.37] | (RefSeq) malate dehydrogenase, mitochondrial (A)	malate dehydrogenase [Pinus pinaster]	MDHM_EUCGU RecName: Full=Malate dehydrogenase, mitochondrial; EC=1.1.1.37; Flags: Precursor;	F4MKL8_PINPS RecName: Full=Malate dehydrogenase {ECO:0000256|RuleBase:RU003405}; EC=1.1.1.37 {ECO:0000256|RuleBase:RU003405};	NAD-dependent malate dehydrogenase	GO:0005759,mitochondrial matrix; GO:0030060,L-malate dehydrogenase activity; GO:0005975,carbohydrate metabolic process; GO:0006108,malate metabolic process; GO:0006099,tricarboxylic acid cycle; GO:0003674,molecular_function; GO:0003824,catalytic activity; GO:0016491,oxidoreductase activity; GO:0016614,oxidoreductase activity, acting on CH-OH group of donors; GO:0016615,malate dehydrogenase activi…	lactate/malate dehydrogenase, NAD binding domain	--	--	--
Cluster-27241.91782	--	--	--	--	--	--	--	--	--	--
Cluster-27241.49783	K10781 fatty acyl-ACP thioesterase B [EC:3.1.2.14 3.1.2.21] | (RefSeq) uncharacterized protein LOC113347984 isoform X1 (A)	unknown [Picea sitchensis]	ML423_ARATH RecName: Full=MLP-like protein 423;	A9NMK0_PICSI SubName: Full=Uncharacterized protein {ECO:0000313|EMBL:ABK21861.1};	--	GO:0016020,membrane; GO:0006952,defense response; GO:0009607,response to biotic stimulus; GO:0006950,response to stress; GO:0008150,biological_process; GO:0050896,response to stimulus; GO:0005575,cellular_component	Pathogenesis-related protein Bet v I family	--	--	--
Cluster-27241.70110	--	--	--	--	--	--	--	--	--	--
Cluster-27241.59643	K19747 BAHD acyltransferase [EC:2.3.1.-] | (RefSeq) BAHD acyltransferase DCR (A)	unknown [Picea sitchensis]	DCR_ARATH RecName: Full=BAHD acyltransferase DCR; EC=2.3.1.-; AltName: Full=Protein DEFECTIVE IN CUTICULAR RIDGES; AltName: Full=Protein PERMEABLE LEAVES 3;	B8LQ10_PICSI SubName: Full=Uncharacterized protein {ECO:0000313|EMBL:ABR17740.1};	--	GO:0005737,cytoplasm; GO:0005829,cytosol; GO:0016747,transferase activity, transferring acyl groups other than amino-acyl groups; GO:0010143,cutin biosynthetic process; GO:0051179,localization; GO:0090626,plant epidermis morphogenesis; GO:0010090,trichome morphogenesis; GO:0003674,molecular_function; GO:0003824,catalytic activity; GO:0016740,transferase activity; GO:0016746,transferase activity, …	Transferase family	--	--	--
Cluster-27241.105589	K00679 phospholipid:diacylglycerol acyltransferase [EC:2.3.1.158] | (RefSeq) hypothetical protein (A)	unknown [Picea sitchensis]	GDL34_ARATH RecName: Full=GDSL esterase/lipase At2g04570; EC=3.1.1.-; AltName: Full=Extracellular lipase At2g04570; Flags: Precursor;	A9P0U2_PICSI SubName: Full=Uncharacterized protein {ECO:0000313|EMBL:ABK26503.1};	--	GO:0005576,extracellular region; GO:0016788,hydrolase activity, acting on ester bonds; GO:0016042,lipid catabolic process; GO:0003674,molecular_function; GO:0003824,catalytic activity; GO:0016787,hydrolase activity; GO:0008152,metabolic process; GO:0006629,lipid metabolic process; GO:0008150,biological_process; GO:0009056,catabolic process; GO:0044238,primary metabolic process; GO:0071704,organic…	GDSL-like Lipase/Acylhydrolase	--	--	--
Cluster-27241.56846	K13429 chitin elicitor receptor kinase 1 | (RefSeq) chitin elicitor receptor kinase 1 isoform X1 (A)	PREDICTED: serine/threonine receptor-like kinase NFP [Nelumbo nucifera]	NFP_MEDTR RecName: Full=Serine/threonine receptor-like kinase NFP {ECO:0000303|PubMed:16723404}; Short=RLK NFP {ECO:0000303|PubMed:16723404}; AltName: Full=Nod factor perception protein {ECO:0000303|PubMed:12753588}; EC=2.7.10.- {ECO:0000255|PROSITE-ProRule:PRU00159}; AltName: Full=Nod-factor receptor 5; Flags: Precursor;	A0A0C9RL02_9SPER SubName: Full=TSA: Wollemia nobilis Ref_Wollemi_Transcript_12964_2687 transcribed RNA sequence {ECO:0000313|EMBL:JAG87291.1};	--	GO:0016021,integral component of membrane; GO:0005886,plasma membrane; GO:0005775,vacuolar lumen; GO:0005524,ATP binding; GO:0004713,protein tyrosine kinase activity; GO:0006952,defense response; GO:0009877,nodulation; GO:1902290,positive regulation of defense response to oomycetes; GO:0006486,protein glycosylation; GO:1900150,regulation of defense response to fungus; GO:0002237,response to molec…	LysM domain	--	--	--
Cluster-27241.76907	K23327 protein Hikeshi | (RefSeq) protein OPI10 homolog (A)	PREDICTED: protein OPI10 homolog [Cicer arietinum]	--	A0A0D6R526_ARACU SubName: Full=Uncharacterized protein {ECO:0000313|EMBL:JAG97924.1};	Uncharacterized conserved protein	--	Protein of unknown function (DUF775)	--	--	--
Cluster-27241.35800	K00430 peroxidase [EC:1.11.1.7] | (RefSeq) peroxidase 72 (A)	unknown [Picea sitchensis]	PER15_ARATH RecName: Full=Peroxidase 15; Short=Atperox P15; EC=1.11.1.7; AltName: Full=ATP36; Flags: Precursor;	B8LPA0_PICSI RecName: Full=Peroxidase {ECO:0000256|RuleBase:RU362060}; EC=1.11.1.7 {ECO:0000256|RuleBase:RU362060};	--	GO:0005618,cell wall; GO:0005576,extracellular region; GO:0020037,heme binding; GO:0046872,metal ion binding; GO:0004601,peroxidase activity; GO:0042744,hydrogen peroxide catabolic process; GO:0006979,response to oxidative stress; GO:0003674,molecular_function; GO:0005488,binding; GO:0046906,tetrapyrrole binding; GO:0048037,cofactor binding; GO:0097159,organic cyclic compound binding; GO:1901363,…	Peroxidase	--	--	--
Cluster-27241.61114	K06944 uncharacterized protein | (RefSeq) ribosome-interacting GTPase 1-like (A)	unknown [Picea sitchensis]	DRG3_ARATH RecName: Full=Developmentally-regulated G-protein 3; Short=AtDRG3; AltName: Full=Developmentally-regulated G-protein 1; Short=AtDRG1;	D5ACC2_PICSI SubName: Full=Uncharacterized protein {ECO:0000313|EMBL:ADE77191.1};	GTP-binding protein DRG1 (ODN superfamily)	GO:0005829,cytosol; GO:0019003,GDP binding; GO:0005525,GTP binding; GO:0003924,GTPase activity; GO:0000166,nucleotide binding; GO:0001882,nucleoside binding; GO:0001883,purine nucleoside binding; GO:0003674,molecular_function; GO:0005488,binding; GO:0017076,purine nucleotide binding; GO:0019001,guanyl nucleotide binding; GO:0032549,ribonucleoside binding; GO:0032550,purine ribonucleoside binding;…	C-terminal region of MMR_HSR1 domain	--	--	--
Cluster-27241.67250	K13993 HSP20 family protein | (RefSeq) 22.7 kDa class IV heat shock protein-like (A)	unknown [Picea sitchensis]	HSP41_PEA RecName: Full=22.7 kDa class IV heat shock protein; Flags: Precursor;	A9NLK7_PICSI SubName: Full=Uncharacterized protein {ECO:0000313|EMBL:ABK21518.1};	Molecular chaperone (small heat-shock protein Hsp26/Hsp42)	GO:0005788,endoplasmic reticulum lumen; GO:0005622,intracellular; GO:0005575,cellular_component; GO:0005623,cell; GO:0005737,cytoplasm; GO:0005783,endoplasmic reticulum; GO:0043231,intracellular membrane-bounded organelle; GO:0012505,endomembrane system; GO:0031974,membrane-enclosed lumen; GO:0043226,organelle; GO:0043227,membrane-bounded organelle; GO:0043229,intracellular organelle; GO:0043233,…	Hsp20/alpha crystallin family	--	--	--
Cluster-27241.49194	K03593 ATP-binding protein involved in chromosome partitioning | (RefSeq) iron-sulfur protein NUBPL isoform X1 (A)	unknown [Picea sitchensis]	NBP35_ARATH RecName: Full=Cytosolic Fe-S cluster assembly factor NBP35 {ECO:0000255|HAMAP-Rule:MF_03038}; AltName: Full=Nucleotide binding protein 35; Short=AtNBP35;	A9P0N7_PICSI RecName: Full=Cytosolic Fe-S cluster assembly factor NBP35 {ECO:0000256|HAMAP-Rule:MF_03038};	Predicted ATPase, nucleotide-binding	GO:0005829,cytosol; GO:0051539,4 iron, 4 sulfur cluster binding; GO:0005524,ATP binding; GO:0051536,iron-sulfur cluster binding; GO:0046872,metal ion binding; GO:0042803,protein homodimerization activity; GO:0016226,iron-sulfur cluster assembly; GO:0003674,molecular_function; GO:0005488,binding; GO:0048037,cofactor binding; GO:0051540,metal cluster binding; GO:0000166,nucleotide binding; GO:00081…	NUBPL iron-transfer P-loop NTPase	--	--	--
Cluster-27241.79537	K09838 zeaxanthin epoxidase [EC:1.14.15.21] | (RefSeq) zeaxanthin epoxidase, chloroplastic-like isoform X1 (A)	unknown [Picea sitchensis]	MO2_ARATH RecName: Full=Monooxygenase 2 {ECO:0000303|PubMed:10216258}; Short=AtMO2 {ECO:0000303|PubMed:10216258}; EC=1.14.13.-;	B8LKW3_PICSI SubName: Full=Uncharacterized protein {ECO:0000313|EMBL:ABR16293.1};	Kynurenine 3-monooxygenase and related flavoprotein monooxygenases	GO:0071949,FAD binding; GO:0004497,monooxygenase activity; GO:0002239,response to oomycetes; GO:0044550,secondary metabolite biosynthetic process; GO:0000166,nucleotide binding; GO:0003674,molecular_function; GO:0005488,binding; GO:0036094,small molecule binding; GO:0043167,ion binding; GO:0043168,anion binding; GO:0048037,cofactor binding; GO:0050660,flavin adenine dinucleotide binding; GO:00506…	FAD binding domain	--	--	--
Cluster-27241.79481	K13691 pathogen-inducible salicylic acid glucosyltransferase [EC:2.4.1.-] | (RefSeq) UDP-glycosyltransferase 74E1-like (A)	unknown [Picea sitchensis]	U74B1_ARATH RecName: Full=UDP-glycosyltransferase 74B1; EC=2.4.1.-; AltName: Full=N-hydroxythioamide S-beta-glucosyltransferase; EC=2.4.1.195; AltName: Full=Thiohydroximate S-glucosyltransferase;	B8LKQ5_PICSI RecName: Full=Glycosyltransferase {ECO:0000256|RuleBase:RU362057}; EC=2.4.1.- {ECO:0000256|RuleBase:RU362057};	UDP-glucuronosyl and UDP-glucosyl transferase	GO:0043231,intracellular membrane-bounded organelle; GO:0080043,quercetin 3-O-glucosyltransferase activity; GO:0080044,quercetin 7-O-glucosyltransferase activity; GO:0047251,thiohydroximate beta-D-glucosyltransferase activity; GO:0102659,UDP-glucose: 4-methylthiobutylhydroximate S-glucosyltransferase activity; GO:0103100,UDP-glucose: 6-methylthiohexylhydroximate S-glucosyltransferase activity; GO…	UDP-glucoronosyl and UDP-glucosyl transferase	--	--	--
Cluster-27241.51081	--	unknown [Picea sitchensis]	NLTP5_LENCU RecName: Full=Non-specific lipid-transfer protein 5; Short=LTP5; Flags: Precursor;	A9NLY0_PICSI RecName: Full=Non-specific lipid-transfer protein {ECO:0000256|RuleBase:RU000628};	--	GO:0008289,lipid binding; GO:0006869,lipid transport; GO:0003674,molecular_function; GO:0005488,binding; GO:0006810,transport; GO:0008150,biological_process; GO:0010876,lipid localization; GO:0033036,macromolecule localization; GO:0051179,localization; GO:0051234,establishment of localization; GO:0071702,organic substance transport	--	--	--	--
Cluster-27241.77227	--	--	--	--	--	--	--	--	--	--
Cluster-27241.64550	--	probable LRR receptor-like serine/threonine-protein kinase At1g56130 isoform X3 [Ananas comosus]	Y1561_ARATH RecName: Full=Probable LRR receptor-like serine/threonine-protein kinase At1g56130; EC=2.7.11.1; Flags: Precursor;	M5WPZ2_PRUPE SubName: Full=Uncharacterized protein {ECO:0000313|EMBL:EMJ15306.1};	--	GO:0016021,integral component of membrane; GO:0005886,plasma membrane; GO:0005524,ATP binding; GO:0004674,protein serine/threonine kinase activity; GO:0000166,nucleotide binding; GO:0003674,molecular_function; GO:0005488,binding; GO:0008144,drug binding; GO:0017076,purine nucleotide binding; GO:0030554,adenyl nucleotide binding; GO:0032553,ribonucleotide binding; GO:0032555,purine ribonucleotide …	--	--	--	--
Cluster-27241.85183	K22503 aspartyl-tRNA synthetase [EC:6.1.1.12] | (RefSeq) aspartate--tRNA ligase 2, cytoplasmic-like (A)	unknown [Picea sitchensis]	SYDC2_ARATH RecName: Full=Aspartate--tRNA ligase 2, cytoplasmic {ECO:0000305}; EC=6.1.1.12 {ECO:0000305}; AltName: Full=Aspartyl-tRNA synthetase {ECO:0000305}; Short=AspRS {ECO:0000305}; AltName: Full=Protein IMPAIRED IN BABA-INDUCED DISEASE IMMUNITY 1 {ECO:0000303|PubMed:24776930};	A9NX07_PICSI SubName: Full=Uncharacterized protein {ECO:0000313|EMBL:ABK25168.1};	Aspartyl-tRNA synthetase	GO:0005829,cytosol; GO:0005783,endoplasmic reticulum; GO:0004815,aspartate-tRNA ligase activity; GO:0005524,ATP binding; GO:0003677,DNA binding; GO:0046872,metal ion binding; GO:0006422,aspartyl-tRNA aminoacylation; GO:0050832,defense response to fungus; GO:0046686,response to cadmium ion; GO:0003674,molecular_function; GO:0003824,catalytic activity; GO:0004812,aminoacyl-tRNA ligase activity; GO:…	tRNA synthetases class II (D, K and N)	--	--	--
Cluster-27241.111290	K15397 3-ketoacyl-CoA synthase [EC:2.3.1.199] | (RefSeq) 3-ketoacyl-CoA synthase 17-like (A)	unknown [Picea sitchensis]	RAD_ANTMA RecName: Full=Transcription factor RADIALIS;	D5ADC1_PICSI SubName: Full=Uncharacterized protein {ECO:0000313|EMBL:ADE77540.1};	Zuotin and related molecular chaperones (DnaJ superfamily), contains DNA-binding domains	GO:0005634,nucleus; GO:0003677,DNA binding; GO:0048262,determination of dorsal/ventral asymmetry; GO:0009908,flower development; GO:0006355,regulation of transcription, DNA-templated; GO:0006351,transcription, DNA-templated; GO:0003674,molecular_function; GO:0003676,nucleic acid binding; GO:0005488,binding; GO:0097159,organic cyclic compound binding; GO:1901363,heterocyclic compound binding; GO:0…	--	--	--	--
Cluster-27241.46878	--	--	--	--	--	--	--	--	--	--
Cluster-27241.61674	--	hypothetical protein CFOL_v3_26883 [Cephalotus follicularis]	--	A0A1Q3CT55_CEPFO SubName: Full=Uncharacterized protein {ECO:0000313|EMBL:GAV83436.1};	--	GO:0016021,integral component of membrane; GO:0005575,cellular_component; GO:0016020,membrane; GO:0031224,intrinsic component of membrane; GO:0044425,membrane part	--	--	--	--
Cluster-27241.69462	K13161 heterogeneous nuclear ribonucleoprotein R | (RefSeq) heterogeneous nuclear ribonucleoprotein Q-like (A)	unknown [Picea sitchensis]	HNRPQ_ARATH RecName: Full=Heterogeneous nuclear ribonucleoprotein Q {ECO:0000305}; Short=hnRNP Q {ECO:0000305}; AltName: Full=Protein LHP1-INTERACTING FACTOR 2 {ECO:0000303|PubMed:21304947};	A0A0C9RL19_9SPER SubName: Full=TSA: Wollemia nobilis Ref_Wollemi_Transcript_12905_2951 transcribed RNA sequence {ECO:0000313|EMBL:JAG87311.1}; SubName: Full=TSA: Wollemia nobilis Ref_Wollemi_Transcript_12906_2878 transcribed RNA sequence {ECO:0000313|EMBL:JAG87310.1};	Heterogeneous nuclear ribonucleoprotein R (RRM superfamily)	GO:0005737,cytoplasm; GO:0005829,cytosol; GO:0005783,endoplasmic reticulum; GO:0005634,nucleus; GO:0003682,chromatin binding; GO:0003729,mRNA binding; GO:0043565,sequence-specific DNA binding; GO:0071395,cellular response to jasmonic acid stimulus; GO:0042742,defense response to bacterium; GO:0050832,defense response to fungus; GO:0045087,innate immune response; GO:0007275,multicellular organism …	RNA recognition motif. (a.k.a. RRM, RBD, or RNP domain)	--	--	--
Cluster-27241.68763	--	unknown [Picea sitchensis]	--	D5ABC6_PICSI SubName: Full=Uncharacterized protein {ECO:0000313|EMBL:ADE76845.1};	--	--	--	--	--	--
Cluster-27241.55277	K13667 EGF-domain serine glucosyl/xylosyltransferase [EC:2.4.1.376 2.4.2.63] | (RefSeq) O-glucosyltransferase rumi (A)	unknown [Picea sitchensis]	--	D5A9F8_PICSI SubName: Full=Uncharacterized protein {ECO:0000313|EMBL:ADE76177.1};	Endoplasmic reticulum protein EP58, contains filamin rod domain and KDEL motif	--	Glycosyl transferase family 90	--	--	--
Cluster-27241.39522	K03860 phosphatidylinositol N-acetylglucosaminyltransferase subunit Q | (RefSeq) N-acetylglucosaminyl-phosphatidylinositol biosynthetic protein gpi1-like (A)	PREDICTED: protein GAST1-like [Malus domestica]	GAST1_SOLLC RecName: Full=Protein GAST1; Flags: Precursor;	A0A1U8P9B9_GOSHI SubName: Full=protein GAST1-like {ECO:0000313|RefSeq:XP_016747745.1};	--	GO:0005576,extracellular region; GO:0005575,cellular_component	--	--	--	--
Cluster-27241.56429	K12472 epidermal growth factor receptor substrate 15 | (RefSeq) GATA zinc finger domain-containing protein 14-like (A)	unknown [Picea sitchensis]	BURP3_ORYSJ RecName: Full=BURP domain-containing protein 3; Short=OsBURP03; Flags: Precursor;	C0PSN2_PICSI SubName: Full=Uncharacterized protein {ECO:0000313|EMBL:ACN40822.1};	--	--	BURP domain	--	--	--
Cluster-27241.83561	K13418 somatic embryogenesis receptor kinase 1 [EC:2.7.10.1 2.7.11.1] | (RefSeq) somatic embryogenesis receptor-like kinase 3 precursor (A)	PREDICTED: probably inactive leucine-rich repeat receptor-like protein kinase At3g28040 [Nelumbo nucifera]	IRK_ARATH RecName: Full=Probable LRR receptor-like serine/threonine-protein kinase IRK {ECO:0000305}; EC=2.7.11.1 {ECO:0000305}; AltName: Full=Inflorescence and root apices receptor-like kinase {ECO:0000303|Ref.1}; Flags: Precursor;	A0A176WBM7_MARPO SubName: Full=Uncharacterized protein {ECO:0000313|EMBL:OAE30344.1};	--	GO:0016021,integral component of membrane; GO:0005886,plasma membrane; GO:0005524,ATP binding; GO:0004672,protein kinase activity; GO:0000166,nucleotide binding; GO:0003674,molecular_function; GO:0005488,binding; GO:0008144,drug binding; GO:0017076,purine nucleotide binding; GO:0030554,adenyl nucleotide binding; GO:0032553,ribonucleotide binding; GO:0032555,purine ribonucleotide binding; GO:00325…	Leucine rich repeat	--	--	--
Cluster-27241.33825	--	PREDICTED: uncharacterized GPI-anchored protein At4g28100-like [Cucumis sativus]	UGPI7_ARATH RecName: Full=Uncharacterized GPI-anchored protein At4g28100; Flags: Precursor;	A0A0A0K5M9_CUCSA SubName: Full=Uncharacterized protein {ECO:0000313|EMBL:KGN43572.1};	--	GO:0031225,anchored component of membrane; GO:0046658,anchored component of plasma membrane; GO:0005575,cellular_component; GO:0016020,membrane; GO:0031224,intrinsic component of membrane; GO:0044425,membrane part; GO:0005886,plasma membrane; GO:0005623,cell; GO:0031226,intrinsic component of plasma membrane; GO:0044459,plasma membrane part; GO:0044464,cell part; GO:0071944,cell periphery	--	--	--	--
Cluster-27241.77853	K22588 acetylserotonin O-methyltransferase, plant [EC:2.1.1.4] | (RefSeq) hypothetical protein (A)	pinosylvin O-methyltransferase 2-4 [Pinus sylvestris]	COMT1_CATRO RecName: Full=Caffeic acid 3-O-methyltransferase; Short=CAOMT; Short=COMT; EC=2.1.1.68; AltName: Full=S-adenosysl-L-methionine:caffeic acid 3-O-methyltransferase;	A0A1S6WNF4_PINSY SubName: Full=Pinosylvin O-methyltransferase 2-4 {ECO:0000313|EMBL:AQX17828.1};	Hydroxyindole-O-methyltransferase and related SAM-dependent methyltransferases	GO:0047763,caffeate O-methyltransferase activity; GO:0046983,protein dimerization activity; GO:0009809,lignin biosynthetic process; GO:0003674,molecular_function; GO:0003824,catalytic activity; GO:0008168,methyltransferase activity; GO:0008171,O-methyltransferase activity; GO:0016740,transferase activity; GO:0016741,transferase activity, transferring one-carbon groups; GO:0005515,protein binding;…	O-methyltransferase domain	--	--	--
Cluster-27241.109606	--	--	--	--	--	--	--	--	--	--
Cluster-27241.70622	--	unknown [Picea sitchensis]	BBX18_ARATH RecName: Full=B-box zinc finger protein 18 {ECO:0000303|PubMed:19920209}; AltName: Full=Protein DOUBLE B-BOX 1A {ECO:0000303|PubMed:20872270}; AltName: Full=Protein SALT TOLERANCE HOMOLOG 4;	A9NLE9_PICSI SubName: Full=Uncharacterized protein {ECO:0000313|EMBL:ABK21460.1};	--	GO:0005634,nucleus; GO:0003700,DNA-binding transcription factor activity; GO:0000989,NA; GO:0008270,zinc ion binding; GO:0070370,cellular heat acclimation; GO:0071483,cellular response to blue light; GO:0010100,negative regulation of photomorphogenesis; GO:0006355,regulation of transcription, DNA-templated; GO:0006351,transcription, DNA-templated; GO:0140110,transcription regulator activity; GO:0…	--	--	--	--
Cluster-27241.62500	K03686 molecular chaperone DnaJ | (RefSeq) uncharacterized protein LOC110894285 (A)	unknown [Picea sitchensis]	DNAJ8_ARATH RecName: Full=Chaperone protein dnaJ 8, chloroplastic; Short=AtDjC8; Short=AtJ8; Flags: Precursor;	D5AD87_PICSI SubName: Full=Uncharacterized protein {ECO:0000313|EMBL:ADE77506.1};	Molecular chaperone (DnaJ superfamily)	GO:0009507,chloroplast; GO:0009570,chloroplast stroma; GO:0005634,nucleus; GO:0009416,response to light stimulus; GO:0008150,biological_process; GO:0009314,response to radiation; GO:0009628,response to abiotic stimulus; GO:0050896,response to stimulus; GO:0005622,intracellular; GO:0005575,cellular_component; GO:0005623,cell; GO:0005737,cytoplasm; GO:0043231,intracellular membrane-bounded organell…	DnaJ domain	--	--	--
Cluster-27241.44583	--	PREDICTED: uncharacterized protein LOC104602680 [Nelumbo nucifera]	SAG20_ARATH RecName: Full=Senescence associated gene 20 {ECO:0000303|PubMed:10444084}; AltName: Full=Protein WOUND-INDUCED 12 {ECO:0000303|PubMed:12857840}; Short=AtWI-12 {ECO:0000303|PubMed:12857840};	A0A1U8AD06_NELNU SubName: Full=uncharacterized protein LOC104602680 {ECO:0000313|RefSeq:XP_010264763.1};	--	GO:0007568,aging; GO:0010150,leaf senescence; GO:0009620,response to fungus; GO:0002238,response to molecule of fungal origin; GO:0009624,response to nematode; GO:0010193,response to ozone; GO:0008150,biological_process; GO:0032502,developmental process; GO:0007275,multicellular organism development; GO:0032501,multicellular organismal process; GO:0048366,leaf development; GO:0048367,shoot system…	Wound-induced protein WI12	--	--	--
Cluster-27241.55598	--	ABI5-like protein, partial [Pinus taeda]	--	G0ZAE6_PINTA SubName: Full=ABI5-like protein {ECO:0000313|EMBL:AEK86263.1}; Flags: Fragment;	--	GO:0003700,DNA-binding transcription factor activity; GO:0140110,transcription regulator activity; GO:0003674,molecular_function	--	--	--	--
Cluster-27241.70833	K13448 calcium-binding protein CML | (RefSeq) probable calcium-binding protein CML50 (A)	hypothetical protein AQUCO_03200068v1 [Aquilegia coerulea]	BAG6_ARATH RecName: Full=BAG family molecular chaperone regulator 6 {ECO:0000303|Ref.3}; AltName: Full=Bcl-2-associated athanogene 6 {ECO:0000303|Ref.3}; AltName: Full=CaM-binding protein 1 {ECO:0000303|PubMed:16003391}; Contains: RecName: Full=Cleaved BAG6 {ECO:0000303|PubMed:26739014};	A0A2G5CZZ8_AQUCA SubName: Full=Uncharacterized protein {ECO:0000313|EMBL:PIA36846.1};	--	GO:0009506,plasmodesma; GO:0005516,calmodulin binding; GO:0051087,chaperone binding; GO:0006914,autophagy; GO:0050832,defense response to fungus; GO:0009817,defense response to fungus, incompatible interaction; GO:0012502,induction of programmed cell death; GO:0010508,positive regulation of autophagy; GO:0006457,protein folding; GO:0009408,response to heat; GO:0009644,response to high light inten…	BAG domain	--	--	--
Cluster-27241.51308	K15803 (-)-germacrene D synthase [EC:4.2.3.75] | (RefSeq) (+)-delta-cadinene synthase isozyme A (A)	caryophyllene/humulene synthase [Pinus sylvestris]	TPSD4_ABIGR RecName: Full=Delta-selinene synthase; EC=4.2.3.71; EC=4.2.3.76; AltName: Full=Agfdsel1;	B4XAK4_PINSY SubName: Full=Caryophyllene/humulene synthase {ECO:0000313|EMBL:ABV44452.1};	--	GO:0005737,cytoplasm; GO:0000287,magnesium ion binding; GO:0010333,terpene synthase activity; GO:0008152,metabolic process; GO:0003674,molecular_function; GO:0005488,binding; GO:0046872,metal ion binding; GO:0043167,ion binding; GO:0043169,cation binding; GO:0003824,catalytic activity; GO:0016829,lyase activity; GO:0016835,carbon-oxygen lyase activity; GO:0016838,carbon-oxygen lyase activity, act…	Terpene synthase family, metal binding domain	--	--	--
Cluster-27241.69748	K01176 alpha-amylase [EC:3.2.1.1] | (RefSeq) probable alpha-amylase 2 (A)	PREDICTED: probable alpha-amylase 2 [Nelumbo nucifera]	AMY2_ARATH RecName: Full=Probable alpha-amylase 2; Short=AtAMY2; EC=3.2.1.1 {ECO:0000250|UniProtKB:P00693}; AltName: Full=1,4-alpha-D-glucan glucanohydrolase;	A0A0D6R8H3_ARACU RecName: Full=Alpha-amylase {ECO:0000256|PIRNR:PIRNR001028}; EC=3.2.1.1 {ECO:0000256|PIRNR:PIRNR001028}; AltName: Full=1,4-alpha-D-glucan glucanohydrolase {ECO:0000256|PIRNR:PIRNR001028};	Alpha-amylase	GO:0005829,cytosol; GO:0005576,extracellular region; GO:0004556,alpha-amylase activity; GO:0103025,alpha-amylase activity (releasing maltohexaose); GO:0005509,calcium ion binding; GO:0005975,carbohydrate metabolic process; GO:0003674,molecular_function; GO:0003824,catalytic activity; GO:0004553,hydrolase activity, hydrolyzing O-glycosyl compounds; GO:0016160,amylase activity; GO:0016787,hydrolase…	Alpha-amylase C-terminal beta-sheet domain	--	--	--
Cluster-27241.59737	K08726 soluble epoxide hydrolase / lipid-phosphate phosphatase [EC:3.3.2.10 3.1.3.76] | (RefSeq) epoxide hydrolase A (A)	unknown [Picea sitchensis]	--	A9NKQ4_PICSI SubName: Full=Uncharacterized protein {ECO:0000313|EMBL:ABK21215.1};	Soluble epoxide hydrolase	GO:0003824,catalytic activity; GO:0003674,molecular_function	alpha/beta hydrolase fold	--	--	--
Cluster-27241.70897	K09422 transcription factor MYB, plant | (RefSeq) transcription factor MYB6 (A)	MYB-like protein, partial [Pinus resinosa]	MYBC_MAIZE RecName: Full=Anthocyanin regulatory C1 protein;	F8TJT0_PINRE SubName: Full=MYB-like protein {ECO:0000313|EMBL:AEH25774.1}; Flags: Fragment;	Transcription factor, Myb superfamily	GO:0005634,nucleus; GO:0003677,DNA binding; GO:0006355,regulation of transcription, DNA-templated; GO:0006351,transcription, DNA-templated; GO:0003674,molecular_function; GO:0003676,nucleic acid binding; GO:0005488,binding; GO:0097159,organic cyclic compound binding; GO:1901363,heterocyclic compound binding; GO:0008152,metabolic process; GO:0006139,nucleobase-containing compound metabolic process…	Myb-like DNA-binding domain	MYB-related	TF	MYB->MYB-related
Cluster-27241.56639	--	cysteine proteinase inhibitor 1-like [Cucurbita maxima]	CYT2_ORYSJ RecName: Full=Cysteine proteinase inhibitor 2; AltName: Full=Oryzacystatin II; Short=OC-II; AltName: Full=Oryzacystatin-2;	A0A1D1YNQ2_9ARAE RecName: Full=Cysteine proteinase inhibitor {ECO:0000256|RuleBase:RU362130}; Flags: Fragment;	--	GO:0004869,cysteine-type endopeptidase inhibitor activity; GO:0002020,protease binding; GO:0006952,defense response; GO:2000117,negative regulation of cysteine-type endopeptidase activity; GO:0003674,molecular_function; GO:0004857,enzyme inhibitor activity; GO:0004866,endopeptidase inhibitor activity; GO:0061135,endopeptidase regulator activity; GO:0098772,molecular function regulator; GO:0030414…	Aspartic acid proteinase inhibitor	--	--	--
Cluster-27241.86155	--	unknown [Picea sitchensis]	--	A9NWK9_PICSI SubName: Full=Uncharacterized protein {ECO:0000313|EMBL:ABK25020.1};	--	--	Acetyltransferase (GNAT) domain	--	--	--
Cluster-27241.80672	K05277 anthocyanidin synthase [EC:1.14.20.4] | (RefSeq) leucoanthocyanidin dioxygenase (A)	unknown [Picea sitchensis]	LDOX_VITVI RecName: Full=Leucoanthocyanidin dioxygenase; Short=LDOX; Short=Leucocyanidin oxygenase; EC=1.14.11.19 {ECO:0000250|UniProtKB:Q96323}; AltName: Full=Leucoanthocyanidin hydroxylase;	A9NVW2_PICSI SubName: Full=Uncharacterized protein {ECO:0000313|EMBL:ABK24773.1};	Iron/ascorbate family oxidoreductases	GO:0031418,L-ascorbic acid binding; GO:0050589,leucocyanidin oxygenase activity; GO:0046872,metal ion binding; GO:0009718,anthocyanin-containing compound biosynthetic process; GO:0003674,molecular_function; GO:0030246,carbohydrate binding; GO:0005488,binding; GO:0019842,vitamin binding; GO:0031406,carboxylic acid binding; GO:0036094,small molecule binding; GO:0043167,ion binding; GO:0043168,anion…	--	--	--	--
Cluster-27241.68032	K13993 HSP20 family protein | (GenBank) small heat shock protein (A)	small heat-shock protein, partial [Pinus taeda]	HS23C_OXYRB RecName: Full=Small heat shock protein, chloroplastic; Flags: Precursor;	B7ZEP8_PINTA SubName: Full=Small heat-shock protein {ECO:0000313|EMBL:CAM12501.1}; Flags: Fragment;	Molecular chaperone (small heat-shock protein Hsp26/Hsp42)	GO:0009570,chloroplast stroma; GO:0005622,intracellular; GO:0005575,cellular_component; GO:0005623,cell; GO:0005737,cytoplasm; GO:0043231,intracellular membrane-bounded organelle; GO:0009507,chloroplast; GO:0009532,plastid stroma; GO:0009536,plastid; GO:0043226,organelle; GO:0043227,membrane-bounded organelle; GO:0043229,intracellular organelle; GO:0044422,organelle part; GO:0044424,intracellular…	Hsp20/alpha crystallin family	--	--	--
Cluster-27241.42390	K20858 calcium uniporter protein, mitochondrial | (RefSeq) calcium uniporter protein 2, mitochondrial (A)	PREDICTED: calcium uniporter protein 2, mitochondrial [Cicer arietinum]	MCU4_ARATH RecName: Full=Calcium uniporter protein 4, mitochondrial; Flags: Precursor;	A0A1S2YSK1_CICAR SubName: Full=calcium uniporter protein 2, mitochondrial {ECO:0000313|RefSeq:XP_004509238.1};	Uncharacterized conserved protein	GO:0016021,integral component of membrane; GO:0005743,mitochondrial inner membrane; GO:0005262,calcium channel activity; GO:0015292,uniporter activity; GO:0003674,molecular_function; GO:0046873,metal ion transmembrane transporter activity; GO:0005215,transporter activity; GO:0005216,ion channel activity; GO:0005261,cation channel activity; GO:0022857,transmembrane transporter activity; GO:0008324…	Mitochondrial calcium uniporter	--	--	--
Cluster-27241.95094	K05929 phosphoethanolamine N-methyltransferase [EC:2.1.1.103] | (RefSeq) phosphomethylethanolamine N-methyltransferase (A)	unknown [Picea sitchensis]	PEAMT_SPIOL RecName: Full=Phosphoethanolamine N-methyltransferase; EC=2.1.1.103;	A9NVZ7_PICSI SubName: Full=Uncharacterized protein {ECO:0000313|EMBL:ABK24808.1};	SAM-dependent methyltransferases	GO:0005737,cytoplasm; GO:0000234,phosphoethanolamine N-methyltransferase activity; GO:0006656,phosphatidylcholine biosynthetic process; GO:0003674,molecular_function; GO:0003824,catalytic activity; GO:0008168,methyltransferase activity; GO:0008170,N-methyltransferase activity; GO:0008757,S-adenosylmethionine-dependent methyltransferase activity; GO:0016740,transferase activity; GO:0016741,transfe…	Methyltransferase domain	--	--	--
Cluster-27241.62975	K13993 HSP20 family protein | (RefSeq) 22.0 kDa heat shock protein-like (A)	unknown [Picea sitchensis]	HSP41_PEA RecName: Full=22.7 kDa class IV heat shock protein; Flags: Precursor;	A9NLK7_PICSI SubName: Full=Uncharacterized protein {ECO:0000313|EMBL:ABK21518.1};	Molecular chaperone (small heat-shock protein Hsp26/Hsp42)	GO:0005788,endoplasmic reticulum lumen; GO:0005622,intracellular; GO:0005575,cellular_component; GO:0005623,cell; GO:0005737,cytoplasm; GO:0005783,endoplasmic reticulum; GO:0043231,intracellular membrane-bounded organelle; GO:0012505,endomembrane system; GO:0031974,membrane-enclosed lumen; GO:0043226,organelle; GO:0043227,membrane-bounded organelle; GO:0043229,intracellular organelle; GO:0043233,…	Hsp20/alpha crystallin family	--	--	--
Cluster-27241.64395	K12472 epidermal growth factor receptor substrate 15 | (RefSeq) GATA zinc finger domain-containing protein 14-like (A)	unknown [Picea sitchensis]	BURP3_ORYSJ RecName: Full=BURP domain-containing protein 3; Short=OsBURP03; Flags: Precursor;	C0PSN2_PICSI SubName: Full=Uncharacterized protein {ECO:0000313|EMBL:ACN40822.1};	--	--	BURP domain	--	--	--
Cluster-27241.106091	K16297 serine carboxypeptidase-like clade II [EC:3.4.16.-] | (RefSeq) serine carboxypeptidase-like 31 (A)	hypothetical protein PHAVU_002G224800g [Phaseolus vulgaris]	SCP31_ARATH RecName: Full=Serine carboxypeptidase-like 31; EC=3.4.16.-; Flags: Precursor;	V7CQS5_PHAVU RecName: Full=Carboxypeptidase {ECO:0000256|RuleBase:RU361156}; EC=3.4.16.- {ECO:0000256|RuleBase:RU361156};	Serine carboxypeptidases (lysosomal cathepsin A)	GO:0005576,extracellular region; GO:0005773,vacuole; GO:0004185,serine-type carboxypeptidase activity; GO:0051603,proteolysis involved in cellular protein catabolic process; GO:0003674,molecular_function; GO:0003824,catalytic activity; GO:0004180,carboxypeptidase activity; GO:0008236,serine-type peptidase activity; GO:0008233,peptidase activity; GO:0008238,exopeptidase activity; GO:0070011,peptid…	Serine carboxypeptidase	--	--	--
Cluster-27241.75678	K01188 beta-glucosidase [EC:3.2.1.21] | (RefSeq) beta-glucosidase 12 isoform X1 (A)	beta-glucosidase 1 [Picea rubens]	BGL24_ORYSJ RecName: Full=Beta-glucosidase 24; Short=Os6bglu24; EC=3.2.1.21; Flags: Precursor;	A0A076FNE3_PICGL SubName: Full=Beta-glucosidase {ECO:0000313|EMBL:AII20122.1};	Beta-glucosidase, lactase phlorizinhydrolase, and related proteins	GO:0008422,beta-glucosidase activity; GO:0102483,scopolin beta-glucosidase activity; GO:0005975,carbohydrate metabolic process; GO:1901657,glycosyl compound metabolic process; GO:0003674,molecular_function; GO:0003824,catalytic activity; GO:0004553,hydrolase activity, hydrolyzing O-glycosyl compounds; GO:0015926,glucosidase activity; GO:0016787,hydrolase activity; GO:0016798,hydrolase activity, a…	Glycosyl hydrolase family 1	--	--	--
Cluster-27241.55891	K22588 acetylserotonin O-methyltransferase, plant [EC:2.1.1.4] | (RefSeq) (R,S)-reticuline 7-O-methyltransferase-like isoform X1 (A)	caffeic acid O-methyl transferase [Pinus radiata]	COMT3_POPKI RecName: Full=Caffeic acid 3-O-methyltransferase 3; Short=CAOMT-3; Short=COMT-3; EC=2.1.1.68; AltName: Full=S-adenosysl-L-methionine:caffeic acid 3-O-methyltransferase 1;	A0A0A7E9L1_PINRA SubName: Full=Caffeic acid O-methyl transferase {ECO:0000313|EMBL:AIY62319.1};	Hydroxyindole-O-methyltransferase and related SAM-dependent methyltransferases	GO:0047763,caffeate O-methyltransferase activity; GO:0046983,protein dimerization activity; GO:0009809,lignin biosynthetic process; GO:0003674,molecular_function; GO:0003824,catalytic activity; GO:0008168,methyltransferase activity; GO:0008171,O-methyltransferase activity; GO:0016740,transferase activity; GO:0016741,transferase activity, transferring one-carbon groups; GO:0005515,protein binding;…	O-methyltransferase domain	--	--	--
Cluster-27241.67580	K01535 H+-transporting ATPase [EC:7.1.2.1] | (RefSeq) plasma membrane ATPase 1-like (A)	PREDICTED: plasma membrane ATPase 1-like [Musa acuminata subsp. malaccensis]	PMA11_ARATH RecName: Full=ATPase 11, plasma membrane-type; EC=3.6.3.6; AltName: Full=Proton pump 11;	D7SIH5_VITVI RecName: Full=Plasma membrane ATPase {ECO:0000256|RuleBase:RU362083}; EC=3.6.3.6 {ECO:0000256|RuleBase:RU362083};	Plasma membrane H+-transporting ATPase	GO:0016021,integral component of membrane; GO:0016020,membrane; GO:0005886,plasma membrane; GO:0005524,ATP binding; GO:0008553,proton-exporting ATPase activity, phosphorylative mechanism; GO:0046872,metal ion binding; GO:0006754,ATP biosynthetic process; GO:0000166,nucleotide binding; GO:0003674,molecular_function; GO:0005488,binding; GO:0008144,drug binding; GO:0017076,purine nucleotide binding;…	E1-E2 ATPase	--	--	--
Cluster-27241.26448	K00679 phospholipid:diacylglycerol acyltransferase [EC:2.3.1.158] | (RefSeq) hypothetical protein (A)	hypothetical protein SELMODRAFT_114853 [Selaginella moellendorffii]	GDL64_ARATH RecName: Full=GDSL esterase/lipase At4g16230; EC=3.1.1.-; AltName: Full=Extracellular lipase At4g16230; Flags: Precursor;	D8SDW6_SELML SubName: Full=Uncharacterized protein {ECO:0000313|EMBL:EFJ17320.1};	--	GO:0005576,extracellular region; GO:0016788,hydrolase activity, acting on ester bonds; GO:0016042,lipid catabolic process; GO:0003674,molecular_function; GO:0003824,catalytic activity; GO:0016787,hydrolase activity; GO:0008152,metabolic process; GO:0006629,lipid metabolic process; GO:0008150,biological_process; GO:0009056,catabolic process; GO:0044238,primary metabolic process; GO:0071704,organic…	Midasin AAA lid domain	--	--	--
Cluster-27241.48616	--	--	--	--	--	--	--	--	--	--
Cluster-27241.73143	K18875 enhanced disease susceptibility 1 protein | (RefSeq) protein EDS1B-like (A)	unknown [Picea sitchensis]	PAD4_ARATH RecName: Full=Lipase-like PAD4; EC=2.3.1.-; AltName: Full=Protein ENHANCED DISEASE SUSCEPTIBILITY 9; AltName: Full=Protein PHYTOALEXIN DEFICIENT 4; Short=AtPAD4;	B8LLQ6_PICSI SubName: Full=Uncharacterized protein {ECO:0000313|EMBL:ABR16586.1};	--	GO:0005737,cytoplasm; GO:0005634,nucleus; GO:0016298,lipase activity; GO:0016740,transferase activity; GO:0010618,aerenchyma formation; GO:0071327,cellular response to trehalose stimulus; GO:0009816,defense response to bacterium, incompatible interaction; GO:0002213,defense response to insect; GO:0009873,ethylene-activated signaling pathway; GO:0010150,leaf senescence; GO:0016042,lipid catabolic …	Enhanced disease susceptibility 1 protein EP domain	--	--	--
Cluster-27241.79731	K09841 xanthoxin dehydrogenase [EC:1.1.1.288] | (RefSeq) xanthoxin dehydrogenase-like isoform X1 (A)	unknown [Picea sitchensis]	SDR2A_ARATH RecName: Full=Short-chain dehydrogenase reductase 2a; Short=AtSDR2a; EC=1.1.1.-;	A9NUM5_PICSI SubName: Full=Uncharacterized protein {ECO:0000313|EMBL:ABK24336.1};	Reductases with broad range of substrate specificities	GO:0016491,oxidoreductase activity; GO:0003674,molecular_function; GO:0003824,catalytic activity	Enoyl-(Acyl carrier protein) reductase	--	--	--
Cluster-27241.54698	K05681 ATP-binding cassette, subfamily G (WHITE), member 2 | (RefSeq) ABC transporter, ATP-binding protein isoform 1 (A)	hypothetical protein AQUCO_03500008v1 [Aquilegia coerulea]	AB11G_ARATH RecName: Full=ABC transporter G family member 11; Short=ABC transporter ABCG.11; Short=AtABCG11; AltName: Full=Protein CUTICULAR DEFECT AND ORGAN FUSION 1; AltName: Full=Protein DESPERADO; AltName: Full=Protein PERMEABLE LEAVES 1; AltName: Full=White-brown complex homolog protein 11; Short=AtWBC11;	A0A0D6R0X6_ARACU SubName: Full=Uncharacterized protein {ECO:0000313|EMBL:JAG96371.1};	Transporter, ABC superfamily (Breast cancer resistance protein)	GO:0009897,external side of plasma membrane; GO:0016021,integral component of membrane; GO:0005886,plasma membrane; GO:0005524,ATP binding; GO:0042626,ATPase activity, coupled to transmembrane movement of substances; GO:0015245,fatty acid transmembrane transporter activity; GO:0042803,protein homodimerization activity; GO:0010588,cotyledon vascular tissue pattern formation; GO:0080051,cutin trans…	ABC-2 type transporter	--	--	--
Cluster-27241.53703	K01054 acylglycerol lipase [EC:3.1.1.23] | (RefSeq) caffeoylshikimate esterase-like (A)	unknown [Picea sitchensis]	CSE_ARATH RecName: Full=Caffeoylshikimate esterase; EC=3.1.1.-; AltName: Full=Lysophospholipase 2; Short=LysoPL2;	A9NV18_PICSI SubName: Full=Uncharacterized protein {ECO:0000313|EMBL:ABK24479.1};	Lysophospholipase	GO:0005783,endoplasmic reticulum; GO:0005794,Golgi apparatus; GO:0005886,plasma membrane; GO:0009506,plasmodesma; GO:0003846,2-acylglycerol O-acyltransferase activity; GO:0090430,caffeoyl-CoA: alcohol caffeoyl transferase activity; GO:0016787,hydrolase activity; GO:0004622,lysophospholipase activity; GO:0009809,lignin biosynthetic process; GO:0006629,lipid metabolic process; GO:0046686,response t…	Serine aminopeptidase, S33	--	--	--
Cluster-27241.62178	--	unknown [Picea sitchensis]	--	D5ABT2_PICSI SubName: Full=Uncharacterized protein {ECO:0000313|EMBL:ADE77001.1};	Uncharacterized conserved protein	--	Coiled-coil domain containing protein (DUF2052)	--	--	--
Cluster-27241.83976	--	--	--	--	--	--	--	--	--	--
Cluster-27241.70670	K20628 expansin | (RefSeq) expansin-A10 (A)	unknown [Picea sitchensis]	EXPA1_ARATH RecName: Full=Expansin-A1; Short=AtEXPA1; AltName: Full=Alpha-expansin-1; Short=At-EXP1; Short=AtEx1; AltName: Full=Ath-ExpAlpha-1.2; Flags: Precursor;	B8LN89_PICSI SubName: Full=Uncharacterized protein {ECO:0000313|EMBL:ABR17119.1};	--	GO:0005618,cell wall; GO:0005576,extracellular region; GO:0016020,membrane; GO:0009664,plant-type cell wall organization; GO:0008150,biological_process; GO:0009987,cellular process; GO:0016043,cellular component organization; GO:0045229,external encapsulating structure organization; GO:0071554,cell wall organization or biogenesis; GO:0071555,cell wall organization; GO:0071669,plant-type cell wall…	Pollen allergen	--	--	--
Cluster-27241.62099	K01513 ectonucleotide pyrophosphatase/phosphodiesterase family member 1/3 [EC:3.1.4.1 3.6.1.9] | (RefSeq) uncharacterized protein LOC109769794 (A)	unknown [Picea sitchensis]	--	A9NLY7_PICSI SubName: Full=Uncharacterized protein {ECO:0000313|EMBL:ABK21648.1};	--	--	Plant protein 1589 of unknown function (A_thal_3526)	--	--	--
Cluster-27241.71300	--	unknown [Picea sitchensis]	SUMO1_ARATH RecName: Full=Small ubiquitin-related modifier 1; Short=AtSUMO1; AltName: Full=Ubiquitin-like protein SMT3;	A9NQT9_PICSI RecName: Full=Small ubiquitin-related modifier {ECO:0000256|RuleBase:RU361190}; Short=SUMO {ECO:0000256|RuleBase:RU361190};	Ubiquitin-like proteins	GO:0005737,cytoplasm; GO:0005829,cytosol; GO:0005634,nucleus; GO:0031386,protein tag; GO:0010286,heat acclimation; GO:0043433,negative regulation of DNA-binding transcription factor activity; GO:0016925,protein sumoylation; GO:0009408,response to heat; GO:0003674,molecular_function; GO:0006950,response to stress; GO:0008150,biological_process; GO:0009266,response to temperature stimulus; GO:00096…	Ubiquitin-2 like Rad60 SUMO-like	--	--	--
Cluster-27241.82996	K17609 nucleoredoxin [EC:1.8.1.8] | (RefSeq) hypothetical protein (A)	kinase family protein [Populus trichocarpa]	PUB52_ARATH RecName: Full=U-box domain-containing protein 52; AltName: Full=Plant U-box protein 52; Includes: RecName: Full=E3 ubiquitin ligase; EC=2.3.2.27; AltName: Full=RING-type E3 ubiquitin transferase {ECO:0000305}; Includes: RecName: Full=Serine/threonine-protein kinase; EC=2.7.11.-;	B9HBB0_POPTR SubName: Full=Kinase family protein {ECO:0000313|EMBL:EEE92547.1};	--	GO:0005524,ATP binding; GO:0004674,protein serine/threonine kinase activity; GO:0004842,ubiquitin-protein transferase activity; GO:0000166,nucleotide binding; GO:0003674,molecular_function; GO:0005488,binding; GO:0008144,drug binding; GO:0017076,purine nucleotide binding; GO:0030554,adenyl nucleotide binding; GO:0032553,ribonucleotide binding; GO:0032555,purine ribonucleotide binding; GO:0032559,…	Protein kinase domain	--	--	--
Cluster-27241.54914	K20606 mitogen-activated protein kinase kinase kinase ANP1 [EC:2.7.11.25] | (RefSeq) receptor-like serine/threonine-protein kinase SD1-7 isoform X1 (A)	PREDICTED: cysteine-rich receptor-like protein kinase 10 isoform X3 [Citrus sinensis]	CRK8_ARATH RecName: Full=Cysteine-rich receptor-like protein kinase 8; Short=Cysteine-rich RLK8; EC=2.7.11.-; Flags: Precursor;	A0A0C9S6I8_9SPER SubName: Full=TSA: Wollemia nobilis Ref_Wollemi_Transcript_14780_2565 transcribed RNA sequence {ECO:0000313|EMBL:JAG86623.1};	--	GO:0016021,integral component of membrane; GO:0005886,plasma membrane; GO:0005524,ATP binding; GO:0004674,protein serine/threonine kinase activity; GO:0042742,defense response to bacterium; GO:0006468,protein phosphorylation; GO:0000166,nucleotide binding; GO:0003674,molecular_function; GO:0005488,binding; GO:0008144,drug binding; GO:0017076,purine nucleotide binding; GO:0030554,adenyl nucleotide…	Protein kinase domain	--	--	--
Cluster-27241.55992	K19861 benzyl alcohol O-benzoyltransferase [EC:2.3.1.196 2.3.1.232] | (RefSeq) benzyl alcohol O-benzoyltransferase-like (A)	CHAT2 [Pinus tabuliformis]	BEBT_CLABR RecName: Full=Benzyl alcohol O-benzoyltransferase; EC=2.3.1.196; AltName: Full=Benzoyl coenzyme A:benzyl alcohol benzoyl transferase;	A0A0K0M6X1_PINTB SubName: Full=CHAT2 {ECO:0000313|EMBL:AJP06252.1};	--	GO:0016747,transferase activity, transferring acyl groups other than amino-acyl groups; GO:0003674,molecular_function; GO:0003824,catalytic activity; GO:0016740,transferase activity; GO:0016746,transferase activity, transferring acyl groups	Transferase family	--	--	--
Cluster-27241.83019	K01728 pectate lyase [EC:4.2.2.2] | (RefSeq) probable pectate lyase 8 (A)	unknown [Picea sitchensis]	PLY20_ARATH RecName: Full=Probable pectate lyase 20; EC=4.2.2.2; Flags: Precursor;	B8LQ61_PICSI RecName: Full=Pectate lyase {ECO:0000256|RuleBase:RU361123}; EC=4.2.2.2 {ECO:0000256|RuleBase:RU361123};	--	GO:0046872,metal ion binding; GO:0030570,pectate lyase activity; GO:0045490,pectin catabolic process; GO:0003674,molecular_function; GO:0005488,binding; GO:0043167,ion binding; GO:0043169,cation binding; GO:0003824,catalytic activity; GO:0016829,lyase activity; GO:0016835,carbon-oxygen lyase activity; GO:0016837,carbon-oxygen lyase activity, acting on polysaccharides; GO:0000272,polysaccharide ca…	--	--	--	--
Cluster-27241.70815	--	--	--	--	--	--	--	--	--	--
Cluster-27241.106139	K09422 transcription factor MYB, plant | (RefSeq) transcription factor MYB61 (A)	R2R3MYB14 [Ginkgo biloba]	MYB61_ARATH RecName: Full=Transcription factor MYB61 {ECO:0000305}; AltName: Full=Myb-related protein 61 {ECO:0000305}; Short=AtMYB61 {ECO:0000303|PubMed:16005292};	A0A222UAB9_GINBI SubName: Full=R2R3MYB14 {ECO:0000313|EMBL:ASR18099.1};	Transcription factor, Myb superfamily	GO:0005634,nucleus; GO:0003700,DNA-binding transcription factor activity; GO:0000981,DNA-binding transcription factor activity, RNA polymerase II-specific; GO:0043565,sequence-specific DNA binding; GO:0001135,RNA polymerase II transcription regulator recruiting activity; GO:0044212,transcription regulatory region DNA binding; GO:0030154,cell differentiation; GO:0010087,phloem or xylem histogenesi…	Myb-like DNA-binding domain	MYB	TF	MYB->MYB
Cluster-27241.79001	--	unknown [Picea sitchensis]	ERD15_ARATH RecName: Full=Protein EARLY RESPONSIVE TO DEHYDRATION 15; AltName: Full=PAM2-containing protein CID1; AltName: Full=Polyadenylate-binding protein-interacting protein 1; Short=PABP-interacting protein 1; Short=Poly(A)-binding protein-interacting protein 1; AltName: Full=Protein CTC-INTERACTING DOMAIN 1; AltName: Full=Protein LIGHT STRESS-REGULATED 1;	A9NNL5_PICSI SubName: Full=Uncharacterized protein {ECO:0000313|EMBL:ABK22226.1};	--	GO:0005737,cytoplasm; GO:0009617,response to bacterium; GO:0009644,response to high light intensity; GO:0009414,response to water deprivation; GO:0008150,biological_process; GO:0009605,response to external stimulus; GO:0009607,response to biotic stimulus; GO:0051707,response to other organism; GO:0043207,response to external biotic stimulus; GO:0050896,response to stimulus; GO:0051704,multi-organ…	Ataxin-2 C-terminal region	--	--	--
Cluster-27241.33240	K15397 3-ketoacyl-CoA synthase [EC:2.3.1.199] | (RefSeq) 3-ketoacyl-CoA synthase 6-like (A)	unknown [Picea sitchensis]	KCS6_ARATH RecName: Full=3-ketoacyl-CoA synthase 6 {ECO:0000303|PubMed:18465198}; Short=KCS-6 {ECO:0000303|PubMed:18465198}; EC=2.3.1.199 {ECO:0000269|PubMed:10330468}; AltName: Full=Cuticular protein 1 {ECO:0000303|PubMed:10330468}; AltName: Full=Eceriferum 6 {ECO:0000303|PubMed:11041893}; AltName: Full=Very long-chain fatty acid condensing enzyme 6 {ECO:0000303|PubMed:18465198}; Short=VLCFA con…	D5A9Z6_PICSI RecName: Full=3-ketoacyl-CoA synthase {ECO:0000256|PIRNR:PIRNR036417}; EC=2.3.1.- {ECO:0000256|PIRNR:PIRNR036417};	--	GO:0005783,endoplasmic reticulum; GO:0005789,endoplasmic reticulum membrane; GO:0016021,integral component of membrane; GO:0102336,3-oxo-arachidoyl-CoA synthase activity; GO:0102337,3-oxo-cerotoyl-CoA synthase activity; GO:0102338,3-oxo-lignoceronyl-CoA synthase activity; GO:0102756,very-long-chain 3-ketoacyl-CoA synthase activity; GO:0006633,fatty acid biosynthetic process; GO:0009409,response t…	3-Oxoacyl-[acyl-carrier-protein (ACP)] synthase III C terminal	--	--	--
Cluster-27241.69745	K01176 alpha-amylase [EC:3.2.1.1] | (RefSeq) probable alpha-amylase 2 isoform X1 (A)	PREDICTED: probable alpha-amylase 2 isoform X1 [Elaeis guineensis]	AMY2_ARATH RecName: Full=Probable alpha-amylase 2; Short=AtAMY2; EC=3.2.1.1 {ECO:0000250|UniProtKB:P00693}; AltName: Full=1,4-alpha-D-glucan glucanohydrolase;	A0A0D6R8H3_ARACU RecName: Full=Alpha-amylase {ECO:0000256|PIRNR:PIRNR001028}; EC=3.2.1.1 {ECO:0000256|PIRNR:PIRNR001028}; AltName: Full=1,4-alpha-D-glucan glucanohydrolase {ECO:0000256|PIRNR:PIRNR001028};	Alpha-amylase	GO:0005829,cytosol; GO:0005576,extracellular region; GO:0004556,alpha-amylase activity; GO:0103025,alpha-amylase activity (releasing maltohexaose); GO:0005509,calcium ion binding; GO:0005975,carbohydrate metabolic process; GO:0003674,molecular_function; GO:0003824,catalytic activity; GO:0004553,hydrolase activity, hydrolyzing O-glycosyl compounds; GO:0016160,amylase activity; GO:0016787,hydrolase…	Alpha-amylase C-terminal beta-sheet domain	--	--	--
Cluster-27241.115959	--	--	--	--	--	--	--	--	--	--
Cluster-27241.63804	K01188 beta-glucosidase [EC:3.2.1.21] | (RefSeq) beta-glucosidase 32 (A)	unknown [Picea sitchensis]	BGL06_ORYSJ RecName: Full=Beta-glucosidase 6 {ECO:0000305}; Short=Os3bglu6 {ECO:0000303|PubMed:17196101}; EC=3.2.1.21 {ECO:0000269|PubMed:19587102}; Flags: Precursor;	B8LQ52_PICSI SubName: Full=Uncharacterized protein {ECO:0000313|EMBL:ABR17782.1};	Beta-glucosidase, lactase phlorizinhydrolase, and related proteins	GO:0005576,extracellular region; GO:0033907,beta-D-fucosidase activity; GO:0004565,beta-galactosidase activity; GO:0080083,beta-gentiobiose beta-glucosidase activity; GO:0008422,beta-glucosidase activity; GO:0080079,cellobiose glucosidase activity; GO:0042973,glucan endo-1,3-beta-D-glucosidase activity; GO:0016798,hydrolase activity, acting on glycosyl bonds; GO:0102483,scopolin beta-glucosidase …	Glycosyl hydrolase family 1	--	--	--
Cluster-27241.70061	K22683 aspartyl protease family protein [EC:3.4.23.-] | (RefSeq) protein ASPARTIC PROTEASE IN GUARD CELL 1-like (A)	unknown [Picea sitchensis]	ASPA_ARATH RecName: Full=Aspartyl protease family protein At5g10770; EC=3.4.23.- {ECO:0000305}; Flags: Precursor;	B8LKD5_PICSI SubName: Full=Uncharacterized protein {ECO:0000313|EMBL:ABR16115.1};	Aspartyl protease	GO:0031225,anchored component of membrane; GO:0005886,plasma membrane; GO:0004190,aspartic-type endopeptidase activity; GO:0030163,protein catabolic process; GO:0006508,proteolysis; GO:0003674,molecular_function; GO:0003824,catalytic activity; GO:0004175,endopeptidase activity; GO:0008233,peptidase activity; GO:0070011,peptidase activity, acting on L-amino acid peptides; GO:0016787,hydrolase acti…	Xylanase inhibitor N-terminal	--	--	--
Cluster-27241.107266	--	hypothetical protein AXG93_1774s1270 [Marchantia polymorpha subsp. ruderalis]	--	A0A176W1T8_MARPO SubName: Full=Uncharacterized protein {ECO:0000313|EMBL:OAE27017.1};	--	GO:0016021,integral component of membrane; GO:0005575,cellular_component; GO:0016020,membrane; GO:0031224,intrinsic component of membrane; GO:0044425,membrane part	Glycosyltransferase like family 2	--	--	--
Cluster-27241.46182	--	unknown [Picea sitchensis]	--	A9NJX5_PICSI SubName: Full=Uncharacterized protein {ECO:0000313|EMBL:ABK20936.1};	--	--	--	--	--	--
Cluster-27241.75743	--	unknown [Picea sitchensis]	--	A9NXE8_PICSI SubName: Full=Uncharacterized protein {ECO:0000313|EMBL:ABK25309.1};	--	--	DnaJ central domain	--	--	--
Cluster-27241.85853	K04077 chaperonin GroEL | (RefSeq) chaperonin CPN60-like 2, mitochondrial (A)	unknown [Picea sitchensis]	NHL13_ARATH RecName: Full=NDR1/HIN1-like protein 13 {ECO:0000303|PubMed:26206852};	A9P136_PICSI SubName: Full=Uncharacterized protein {ECO:0000313|EMBL:ABK26597.1};	--	GO:0016021,integral component of membrane; GO:0005886,plasma membrane; GO:0009506,plasmodesma; GO:0042742,defense response to bacterium; GO:0006952,defense response; GO:0006950,response to stress; GO:0008150,biological_process; GO:0009605,response to external stimulus; GO:0009607,response to biotic stimulus; GO:0051707,response to other organism; GO:0009617,response to bacterium; GO:0043207,respo…	Late embryogenesis abundant protein	--	--	--
Cluster-27241.97006	--	unknown [Picea sitchensis]	--	D5AEB5_PICSI SubName: Full=Uncharacterized protein {ECO:0000313|EMBL:ADE77884.1};	--	--	--	--	--	--
Cluster-27241.59853	--	unknown [Picea sitchensis]	--	A9NLT2_PICSI SubName: Full=Uncharacterized protein {ECO:0000313|EMBL:ABK21593.1};	--	--	--	--	--	--
Cluster-27241.42415	K23877 xyloglucan O-acetyltransferase | (RefSeq) protein ALTERED XYLOGLUCAN 4-like (A)	unknown [Picea sitchensis]	TBL6_ARATH RecName: Full=Protein trichome birefringence-like 6;	D5A976_PICSI SubName: Full=Uncharacterized protein {ECO:0000313|EMBL:ADE76095.1};	--	GO:0005794,Golgi apparatus; GO:0016021,integral component of membrane; GO:0016413,O-acetyltransferase activity; GO:0071554,cell wall organization or biogenesis; GO:0003674,molecular_function; GO:0003824,catalytic activity; GO:0008374,O-acyltransferase activity; GO:0016407,acetyltransferase activity; GO:0016740,transferase activity; GO:0016746,transferase activity, transferring acyl groups; GO:001…	GDSL/SGNH-like Acyl-Esterase family found in Pmr5 and Cas1p	--	--	--
Cluster-27241.33105	--	root phototropism protein 3 [Quercus suber]	RPT3_ARATH RecName: Full=Root phototropism protein 3; AltName: Full=BTB/POZ domain-containing protein RPT3; AltName: Full=Non-phototropic hypocotyl protein 3;	A0A068TN63_COFCA SubName: Full=Uncharacterized protein {ECO:0000313|EMBL:CDO97399.1};	--	GO:0005886,plasma membrane; GO:0004871,NA; GO:0009638,phototropism; GO:0016567,protein ubiquitination; GO:0008150,biological_process; GO:0009314,response to radiation; GO:0009416,response to light stimulus; GO:0009605,response to external stimulus; GO:0009606,tropism; GO:0009628,response to abiotic stimulus; GO:0009637,response to blue light; GO:0050896,response to stimulus; GO:0008152,metabolic …	NPH3 family	--	--	--
Cluster-27241.83250	K00799 glutathione S-transferase [EC:2.5.1.18] | (RefSeq) probable glutathione S-transferase parA (A)	tau class glutathione S-transferase [Pinus tabuliformis]	GSTUJ_ARATH RecName: Full=Glutathione S-transferase U19; Short=AtGSTU19; EC=2.5.1.18; AltName: Full=GST class-tau member 19; AltName: Full=Glutathione S-transferase 8;	L7S273_PINTB SubName: Full=Tau class glutathione S-transferase {ECO:0000313|EMBL:AGC13137.1}; EC=2.5.1.18 {ECO:0000313|EMBL:AGC13137.1};	Glutathione S-transferase	GO:0009507,chloroplast; GO:0009570,chloroplast stroma; GO:0005737,cytoplasm; GO:0005829,cytosol; GO:0005886,plasma membrane; GO:0005774,vacuolar membrane; GO:0043295,glutathione binding; GO:0004364,glutathione transferase activity; GO:0004601,peroxidase activity; GO:0042631,cellular response to water deprivation; GO:0006749,glutathione metabolic process; GO:0046686,response to cadmium ion; GO:000…	Glutathione S-transferase, N-terminal domain	--	--	--
Cluster-27241.48321	--	--	--	--	--	--	--	--	--	--
Cluster-27241.83414	K10669 2'-phosphotransferase [EC:2.7.1.160] | (RefSeq) tRNA 2'-phosphotransferase 1-like (A)	unknown [Picea sitchensis]	--	B8LLX4_PICSI SubName: Full=Uncharacterized protein {ECO:0000313|EMBL:ABR16654.1};	RNA:NAD 2'-phosphotransferase TPT1	GO:0016772,transferase activity, transferring phosphorus-containing groups; GO:0006388,tRNA splicing, via endonucleolytic cleavage and ligation; GO:0003674,molecular_function; GO:0003824,catalytic activity; GO:0016740,transferase activity; GO:0000394,RNA splicing, via endonucleolytic cleavage and ligation; GO:0008152,metabolic process; GO:0006139,nucleobase-containing compound metabolic process; …	RNA 2'-phosphotransferase, Tpt1 / KptA family	--	--	--
Cluster-27241.72385	--	--	--	--	--	--	--	--	--	--
Cluster-27241.61629	K24028 salicylic acid 3-hydroxylase [EC:1.14.11.-] | (Kazusa) Lj0g3v0213339.1; - (A)	GA2ox1 [Pinus tabuliformis]	FL3H2_ORYSJ RecName: Full=Flavanone 3-dioxygenase 2 {ECO:0000305}; EC=1.14.11.9 {ECO:0000269|PubMed:18413994}; AltName: Full=Flavanone 3-beta-hydroxylase 2 {ECO:0000305}; AltName: Full=Flavanone 3-hydroxylase 2 {ECO:0000303|PubMed:18413994}; Short=OsF3H-2 {ECO:0000303|PubMed:18413994};	X5CHR1_PINTB SubName: Full=GA2ox1 {ECO:0000313|EMBL:AHW42451.1};	Iron/ascorbate family oxidoreductases	GO:0031418,L-ascorbic acid binding; GO:0046872,metal ion binding; GO:0045486,naringenin 3-dioxygenase activity; GO:0009813,flavonoid biosynthetic process; GO:0003674,molecular_function; GO:0030246,carbohydrate binding; GO:0005488,binding; GO:0019842,vitamin binding; GO:0031406,carboxylic acid binding; GO:0036094,small molecule binding; GO:0043167,ion binding; GO:0043168,anion binding; GO:0043177,…	non-haem dioxygenase in morphine synthesis N-terminal	--	--	--
Cluster-27241.72437	K13025 ATP-dependent RNA helicase [EC:3.6.4.13] | (RefSeq) eukaryotic initiation factor 4A-3 (A)	unknown [Picea sitchensis]	IF43A_ORYSJ RecName: Full=Eukaryotic initiation factor 4A-III homolog A {ECO:0000305}; Short=OseIF4AIIIa {ECO:0000303|PubMed:27071313}; Short=eIF-4A-III {ECO:0000305}; Short=eIF4A-III {ECO:0000305}; EC=3.6.4.13 {ECO:0000305}; AltName: Full=DEAD-box ATP-dependent RNA helicase 2 {ECO:0000303|PubMed:27071313}; Short=OsRH2 {ECO:0000303|PubMed:27071313};	A9NUU4_PICSI SubName: Full=Uncharacterized protein {ECO:0000313|EMBL:ABK24405.1};	Predicted ATP-dependent RNA helicase FAL1, involved in rRNA maturation, DEAD-box superfamily	GO:0071013,catalytic step 2 spliceosome; GO:0005737,cytoplasm; GO:0005730,nucleolus; GO:0005524,ATP binding; GO:0004004,ATP-dependent RNA helicase activity; GO:0003723,RNA binding; GO:0006397,mRNA processing; GO:0051028,mRNA transport; GO:0000184,nuclear-transcribed mRNA catabolic process, nonsense-mediated decay; GO:0010468,regulation of gene expression; GO:0006417,regulation of translation; GO:…	Adenovirus E3 protein	--	--	--
Cluster-27241.78636	--	--	--	--	--	--	--	--	--	--
Cluster-27241.56147	--	unknown [Picea sitchensis]	HIP2_ARATH RecName: Full=Heavy metal-associated isoprenylated plant protein 2 {ECO:0000303|PubMed:21072340, ECO:0000303|PubMed:23368984}; Short=AtHIP02 {ECO:0000303|PubMed:21072340, ECO:0000303|PubMed:23368984}; Flags: Precursor;	A9NTQ2_PICSI SubName: Full=Uncharacterized protein {ECO:0000313|EMBL:ABK24013.1};	Copper chaperone	GO:0005737,cytoplasm; GO:0046914,transition metal ion binding; GO:0046916,cellular transition metal ion homeostasis; GO:0030001,metal ion transport; GO:0003674,molecular_function; GO:0005488,binding; GO:0046872,metal ion binding; GO:0043167,ion binding; GO:0043169,cation binding; GO:0006873,cellular ion homeostasis; GO:0006875,cellular metal ion homeostasis; GO:0008150,biological_process; GO:0009…	Heavy-metal-associated domain	--	--	--
Cluster-27241.94920	--	unknown [Picea sitchensis]	--	A9P1I8_PICSI SubName: Full=Uncharacterized protein {ECO:0000313|EMBL:ABK26749.1};	--	--	--	--	--	--
Cluster-27241.78849	--	putative CC-NBS-LRR protein, partial [Pinus monticola]	DRL30_ARATH RecName: Full=Probable disease resistance protein At5g04720;	A5WZ17_PINMO SubName: Full=Putative CC-NBS-LRR protein {ECO:0000313|EMBL:ABA03077.1}; Flags: Fragment;	--	GO:0043531,ADP binding; GO:0005524,ATP binding; GO:0042742,defense response to bacterium; GO:0000166,nucleotide binding; GO:0003674,molecular_function; GO:0005488,binding; GO:0017076,purine nucleotide binding; GO:0030554,adenyl nucleotide binding; GO:0032553,ribonucleotide binding; GO:0032555,purine ribonucleotide binding; GO:0032559,adenyl ribonucleotide binding; GO:0036094,small molecule bindin…	NB-ARC domain	--	--	--
Cluster-27241.56391	K03283 heat shock 70kDa protein 1/2/6/8 | (RefSeq) heat shock 70 kDa protein 18-like isoform X1 (A)	unknown [Picea sitchensis]	--	A9NW33_PICSI SubName: Full=Uncharacterized protein {ECO:0000313|EMBL:ABK24844.1};	--	--	C1 domain	--	--	--
Cluster-27241.72112	--	unknown [Picea sitchensis]	--	A9P0A3_PICSI SubName: Full=Uncharacterized protein {ECO:0000313|EMBL:ABK26314.1};	--	--	--	--	--	--
Cluster-27241.91735	K12951 cobalt/nickel-transporting P-type ATPase D [EC:7.2.2.-] | (RefSeq) hypothetical protein (A)	PREDICTED: protodermal factor 1 [Theobroma cacao]	OLE96_ARATH RecName: Full=Pollen-specific protein-like At4g18596; Flags: Precursor;	A0A061E678_THECC SubName: Full=Pollen Ole e 1 allergen and extensin family protein {ECO:0000313|EMBL:EOX97748.1};	--	GO:0005615,extracellular space; GO:0005575,cellular_component; GO:0005576,extracellular region; GO:0044421,extracellular region part	Pollen proteins Ole e I like	--	--	--
Cluster-27241.73944	--	unknown [Picea sitchensis]	--	D5ABT5_PICSI SubName: Full=Uncharacterized protein {ECO:0000313|EMBL:ADE77004.1};	--	--	Protein of unknown function (DUF1685)	--	--	--
Cluster-27241.67931	K09422 transcription factor MYB, plant | (RefSeq) transcription factor MYB7-like (A)	R2R3MYB10 [Ginkgo biloba]	MYB5_ARATH RecName: Full=Transcription repressor MYB5; AltName: Full=AtM2; AltName: Full=Myb-related protein 5; Short=AtMYB5;	A0A222UAF4_GINBI SubName: Full=R2R3MYB10 {ECO:0000313|EMBL:ASR18095.1};	Transcription factor, Myb superfamily	GO:0005634,nucleus; GO:0003700,DNA-binding transcription factor activity; GO:0000981,DNA-binding transcription factor activity, RNA polymerase II-specific; GO:0043565,sequence-specific DNA binding; GO:0001135,RNA polymerase II transcription regulator recruiting activity; GO:0044212,transcription regulatory region DNA binding; GO:0048354,mucilage biosynthetic process involved in seed coat developm…	Myb-like DNA-binding domain	MYB	TF	MYB->MYB
Cluster-27241.64347	K23452 UDP-glucosyltransferase 85A [EC:2.4.1.-] | (RefSeq) UDP-glycosyltransferase 85A5-like (A)	UGT85A, partial [Pinus tabuliformis]	UGT2_GARJA RecName: Full=7-deoxyloganetin glucosyltransferase; EC=2.4.1.324; AltName: Full=Genipin glucosyltransferase; AltName: Full=UDP-glucose glucosyltransferase 2; Short=GjUGT2; AltName: Full=UDP-glycosyltransferase 85A24;	A0A0K0M736_PINTB SubName: Full=UGT85A {ECO:0000313|EMBL:AJP06365.1}; Flags: Fragment;	UDP-glucuronosyl and UDP-glucosyl transferase	GO:0035251,UDP-glucosyltransferase activity; GO:0008152,metabolic process; GO:0003674,molecular_function; GO:0003824,catalytic activity; GO:0008194,UDP-glycosyltransferase activity; GO:0016740,transferase activity; GO:0016757,transferase activity, transferring glycosyl groups; GO:0016758,transferase activity, transferring hexosyl groups; GO:0046527,glucosyltransferase activity; GO:0008150,biologi…	UDP-glucoronosyl and UDP-glucosyl transferase	--	--	--
Cluster-27241.108047	K15382 solute carrier family 50 (sugar transporter) | (RefSeq) hypothetical protein (A)	unknown [Picea sitchensis]	SWT6B_ORYSJ RecName: Full=Bidirectional sugar transporter SWEET6b; Short=OsSWEET6b;	D5AB08_PICSI RecName: Full=Bidirectional sugar transporter SWEET {ECO:0000256|RuleBase:RU910715};	Multitransmembrane protein	GO:0016021,integral component of membrane; GO:0005887,integral component of plasma membrane; GO:0051119,sugar transmembrane transporter activity; GO:0008643,carbohydrate transport; GO:0003674,molecular_function; GO:0005215,transporter activity; GO:0022857,transmembrane transporter activity; GO:0015144,carbohydrate transmembrane transporter activity; GO:0006810,transport; GO:0008150,biological_pro…	Sugar efflux transporter for intercellular exchange	--	--	--
Cluster-27241.71078	K09872 aquaporin PIP | (RefSeq) PIP2;2; aquaporin PIP2;2 (A)	unknown [Picea sitchensis]	PIP28_ARATH RecName: Full=Probable aquaporin PIP2-8; AltName: Full=Plasma membrane intrinsic protein 2-8; Short=AtPIP2;8; AltName: Full=Plasma membrane intrinsic protein 3b; Short=PIP3b;	A9NZ60_PICSI SubName: Full=Uncharacterized protein {ECO:0000313|EMBL:ABK25921.1};	Aquaporin (major intrinsic protein family)	GO:0005887,integral component of plasma membrane; GO:0016020,membrane; GO:0015250,water channel activity; GO:0034220,ion transmembrane transport; GO:0009737,response to abscisic acid; GO:0003674,molecular_function; GO:0005215,transporter activity; GO:0022857,transmembrane transporter activity; GO:0005372,water transmembrane transporter activity; GO:0015267,channel activity; GO:0015318,inorganic m…	Major intrinsic protein	--	--	--
Cluster-27241.67751	--	unknown [Picea sitchensis]	POP3_ARATH RecName: Full=Stress-response A/B barrel domain-containing protein HS1 {ECO:0000305}; AltName: Full=Pop3 family protein At3g17210 {ECO:0000305}; AltName: Full=Protein HEAT STABLE 1 {ECO:0000303|PubMed:17720140}; Short=AtHS1 {ECO:0000303|PubMed:17720140};	A9NME3_PICSI SubName: Full=Uncharacterized protein {ECO:0000313|EMBL:ABK21804.1};	--	GO:0005829,cytosol; GO:0005886,plasma membrane; GO:0046872,metal ion binding; GO:0042742,defense response to bacterium; GO:0050832,defense response to fungus; GO:0003674,molecular_function; GO:0005488,binding; GO:0043167,ion binding; GO:0043169,cation binding; GO:0006952,defense response; GO:0006950,response to stress; GO:0008150,biological_process; GO:0009605,response to external stimulus; GO:00…	Stress responsive A/B Barrel Domain	--	--	--
Cluster-27241.64888	K24140 glutaredoxin-dependent peroxiredoxin [EC:1.11.1.25] | (RefSeq) peroxiredoxin-2 (A)	unknown [Picea sitchensis]	PR2E1_ORYSJ RecName: Full=Peroxiredoxin-2E-1, chloroplastic; EC=1.11.1.15; AltName: Full=Peroxiredoxin IIE-1; AltName: Full=Thioredoxin peroxidase 2E-1; Flags: Precursor;	A9NN26_PICSI SubName: Full=Uncharacterized protein {ECO:0000313|EMBL:ABK22037.1};	Alkyl hydroperoxide reductase/peroxiredoxin	GO:0009570,chloroplast stroma; GO:0004601,peroxidase activity; GO:0051920,peroxiredoxin activity; GO:0045454,cell redox homeostasis; GO:0003674,molecular_function; GO:0003824,catalytic activity; GO:0016491,oxidoreductase activity; GO:0016209,antioxidant activity; GO:0016684,oxidoreductase activity, acting on peroxide as acceptor; GO:0008150,biological_process; GO:0009987,cellular process; GO:0019…	Redoxin	--	--	--
Cluster-27241.69460	--	--	--	--	--	--	--	--	--	--
Cluster-27241.73857	--	EGF-like [Macleaya cordata]	--	A0A0D6QV61_ARACU SubName: Full=Uncharacterized protein {ECO:0000313|EMBL:JAG94351.1};	--	GO:0016021,integral component of membrane; GO:0016846,carbon-sulfur lyase activity; GO:0003674,molecular_function; GO:0003824,catalytic activity; GO:0016829,lyase activity; GO:0005575,cellular_component; GO:0016020,membrane; GO:0031224,intrinsic component of membrane; GO:0044425,membrane part	--	--	--	--
Cluster-27241.66505	K09841 xanthoxin dehydrogenase [EC:1.1.1.288] | (RefSeq) xanthoxin dehydrogenase-like (A)	BSU5 [Pinus tabuliformis]	SDR2A_ARATH RecName: Full=Short-chain dehydrogenase reductase 2a; Short=AtSDR2a; EC=1.1.1.-;	A0A0K0M797_PINTB SubName: Full=BSU5 {ECO:0000313|EMBL:AJP06249.1};	Reductases with broad range of substrate specificities	GO:0016491,oxidoreductase activity; GO:0003674,molecular_function; GO:0003824,catalytic activity	--	--	--	--
Cluster-27241.126567	K00784 ribonuclease Z [EC:3.1.26.11] | (RefSeq) tRNase Z TRZ1 isoform X1 (A)	PREDICTED: protein RADIALIS-like 1 [Vitis vinifera]	RADL1_ARATH RecName: Full=Protein RADIALIS-like 1; Short=AtRL1; Short=Protein RAD-like 1; AltName: Full=Protein RADIALIS-LIKE SANT/MYB 2; Short=Protein RSM2;	A5AGM5_VITVI SubName: Full=Uncharacterized protein {ECO:0000313|EMBL:CAN68999.1};	Zuotin and related molecular chaperones (DnaJ superfamily), contains DNA-binding domains	GO:0005634,nucleus; GO:0003677,DNA binding; GO:0003700,DNA-binding transcription factor activity; GO:0006351,transcription, DNA-templated; GO:0003674,molecular_function; GO:0003676,nucleic acid binding; GO:0005488,binding; GO:0097159,organic cyclic compound binding; GO:1901363,heterocyclic compound binding; GO:0140110,transcription regulator activity; GO:0008152,metabolic process; GO:0006139,nucl…	Myb-like DNA-binding domain	MYB-related	TF	MYB->MYB-related
Cluster-27241.68741	K20989 urea-proton symporter | (RefSeq) urea-proton symporter DUR3 isoform X1 (A)	urea-proton symporter DUR3 isoform X1 [Amborella trichopoda]	DUR3_ARATH RecName: Full=Urea-proton symporter DUR3; Short=AtDUR3; AltName: Full=High-affinity urea active transporter DUR3;	U5D087_AMBTC SubName: Full=Uncharacterized protein {ECO:0000313|EMBL:ERN15640.1};	Urea transporter	GO:0005887,integral component of plasma membrane; GO:0005886,plasma membrane; GO:0015293,symporter activity; GO:0015204,urea transmembrane transporter activity; GO:0006995,cellular response to nitrogen starvation; GO:0071918,urea transmembrane transport; GO:0003674,molecular_function; GO:0005215,transporter activity; GO:0022857,transmembrane transporter activity; GO:0015291,secondary active trans…	Sodium:solute symporter family	--	--	--
Cluster-27241.87755	--	unknown [Picea sitchensis]	--	A9NXB1_PICSI SubName: Full=Uncharacterized protein {ECO:0000313|EMBL:ABK25272.1};	--	--	--	--	--	--
Cluster-27241.60481	K13993 HSP20 family protein | (RefSeq) small heat shock protein, chloroplastic (A)	unknown [Picea sitchensis]	HS21C_WHEAT RecName: Full=Small heat shock protein, chloroplastic; AltName: Full=Heat shock protein 26.6; Flags: Precursor;	A9NKY0_PICSI SubName: Full=Uncharacterized protein {ECO:0000313|EMBL:ABK21291.1};	Molecular chaperone (small heat-shock protein Hsp26/Hsp42)	GO:0009507,chloroplast; GO:0005622,intracellular; GO:0005575,cellular_component; GO:0005623,cell; GO:0005737,cytoplasm; GO:0043231,intracellular membrane-bounded organelle; GO:0009536,plastid; GO:0043226,organelle; GO:0043227,membrane-bounded organelle; GO:0043229,intracellular organelle; GO:0044424,intracellular part; GO:0044444,cytoplasmic part; GO:0044464,cell part	--	--	--	--
Cluster-27241.95779	--	--	--	--	--	--	--	--	--	--
Cluster-27241.54693	K21989 calcium permeable stress-gated cation channel | (RefSeq) CSC1-like protein ERD4 (A)	CSC1-like protein ERD4 [Manihot esculenta]	CSC1L_BRAJU RecName: Full=CSC1-like protein ERD4; AltName: Full=Protein EARLY-RESPONSIVE TO DEHYDRATION STRESS 4;	A0A0D6QTR2_ARACU SubName: Full=Uncharacterized protein {ECO:0000313|EMBL:JAG93393.1};	Uncharacterized conserved protein	GO:0031969,chloroplast membrane; GO:0016021,integral component of membrane; GO:0006811,ion transport; GO:0006810,transport; GO:0008150,biological_process; GO:0051179,localization; GO:0051234,establishment of localization; GO:0005622,intracellular; GO:0005575,cellular_component; GO:0016020,membrane; GO:0005623,cell; GO:0005737,cytoplasm; GO:0043231,intracellular membrane-bounded organelle; GO:0009…	Calcium-dependent channel, 7TM region, putative phosphate	--	--	--
Cluster-27241.67184	--	unknown [Picea sitchensis]	--	C0PT70_PICSI SubName: Full=Uncharacterized protein {ECO:0000313|EMBL:ACN41010.1};	--	--	Proline-rich nuclear receptor coactivator motif	--	--	--
Cluster-27241.74097	--	--	--	--	--	--	--	--	--	--
Cluster-27241.22771	--	unknown [Picea sitchensis]	AMP21_MACIN RecName: Full=Vicilin-like antimicrobial peptides 2-1; AltName: Full=MiAMP2; Contains: RecName: Full=Antimicrobial peptide 2a; AltName: Full=MiAMP2a; Contains: RecName: Full=Antimicrobial peptide 2b; AltName: Full=MiAMP2b; Contains: RecName: Full=Antimicrobial peptide 2c-1; AltName: Full=MiAMP2c-1; Contains: RecName: Full=Antimicrobial peptide 2c-2; AltName: Full=MiAMP2c-2; Contains: …	A9NW52_PICSI SubName: Full=Uncharacterized protein {ECO:0000313|EMBL:ABK24863.1};	--	GO:0005576,extracellular region; GO:0045735,nutrient reservoir activity; GO:0042742,defense response to bacterium; GO:0050832,defense response to fungus; GO:0031640,killing of cells of other organism; GO:0003674,molecular_function; GO:0006952,defense response; GO:0006950,response to stress; GO:0008150,biological_process; GO:0009605,response to external stimulus; GO:0009607,response to biotic stim…	Cupin	--	--	--
Cluster-27241.58246	K03283 heat shock 70kDa protein 1/2/6/8 | (RefSeq) heat shock cognate 70 kDa protein 2-like (A)	LEAF RUST 10 DISEASE-RESISTANCE LOCUS RECEPTOR-LIKE PROTEIN KINASE-like 2.7 [Jatropha curcas]	LRK10_WHEAT RecName: Full=Rust resistance kinase Lr10 {ECO:0000312|EMBL:AAC49629.1}; EC=2.7.11.1; AltName: Full=Probable receptor-like serine/threonine-protein kinase LRK10; Flags: Precursor;	A0A067KMG1_JATCU SubName: Full=Uncharacterized protein {ECO:0000313|EMBL:KDP32999.1};	Serine/threonine protein kinase	GO:0016021,integral component of membrane; GO:0005886,plasma membrane; GO:0005524,ATP binding; GO:0004674,protein serine/threonine kinase activity; GO:0000166,nucleotide binding; GO:0003674,molecular_function; GO:0005488,binding; GO:0008144,drug binding; GO:0017076,purine nucleotide binding; GO:0030554,adenyl nucleotide binding; GO:0032553,ribonucleotide binding; GO:0032555,purine ribonucleotide …	Protein tyrosine kinase	--	--	--
Cluster-27241.77365	--	--	--	--	--	--	--	--	--	--
Cluster-27241.60873	--	hypothetical protein 2_7562_01, partial [Pinus taeda]	--	K7NLB1_PINTA SubName: Full=Uncharacterized protein {ECO:0000313|EMBL:AEX12754.1}; Flags: Fragment;	--	GO:0016021,integral component of membrane; GO:0005575,cellular_component; GO:0016020,membrane; GO:0031224,intrinsic component of membrane; GO:0044425,membrane part	Family of unknown function (DUF716)	--	--	--
Cluster-27241.65714	K01785 aldose 1-epimerase [EC:5.1.3.3] | (RefSeq) aldose 1-epimerase-like (A)	unknown [Picea sitchensis]	--	D5AEE6_PICSI RecName: Full=Aldose 1-epimerase {ECO:0000256|PIRNR:PIRNR005096}; EC=5.1.3.3 {ECO:0000256|PIRNR:PIRNR005096}; AltName: Full=Galactose mutarotase {ECO:0000256|PIRNR:PIRNR005096};	Predicted mutarotase	GO:0004034,aldose 1-epimerase activity; GO:0030246,carbohydrate binding; GO:0019318,hexose metabolic process; GO:0003674,molecular_function; GO:0003824,catalytic activity; GO:0016853,isomerase activity; GO:0016854,racemase and epimerase activity; GO:0016857,racemase and epimerase activity, acting on carbohydrates and derivatives; GO:0005488,binding; GO:0008152,metabolic process; GO:0005975,carboh…	Aldose 1-epimerase	--	--	--
Cluster-27241.66183	K13083 flavonoid 3',5'-hydroxylase [EC:1.14.14.81] | (RefSeq) flavonoid 3',5'-hydroxylase 2-like (A)	unknown [Picea sitchensis]	C75A5_EUSER RecName: Full=Flavonoid 3',5'-hydroxylase; Short=F3'5'H; EC=1.14.13.88; AltName: Full=Cytochrome P450 75A5;	A0A0G7ZNZ0_PICGL SubName: Full=Cytochrome P450 CYP75A14v2 {ECO:0000313|EMBL:JAI17649.1};	Cytochrome P450 CYP2 subfamily	GO:0033772,flavonoid 3',5'-hydroxylase activity; GO:0020037,heme binding; GO:0005506,iron ion binding; GO:0009718,anthocyanin-containing compound biosynthetic process; GO:0003674,molecular_function; GO:0003824,catalytic activity; GO:0004497,monooxygenase activity; GO:0016491,oxidoreductase activity; GO:0016705,oxidoreductase activity, acting on paired donors, with incorporation or reduction of mo…	Cytochrome P450	--	--	--
Cluster-27241.85212	--	--	--	--	--	--	--	--	--	--
Cluster-27241.57125	K13070 momilactone-A synthase [EC:1.1.1.295] | (RAP-DB) Os04g0179200, MAS, MOMILACTONE_A_SYNTHASE; Similar to Stem secoisolariciresinol dehydrogenase (Fragment). (A)	unknown [Picea sitchensis]	MOMAS_ORYSJ RecName: Full=Momilactone A synthase; Short=OsMAS; EC=1.1.1.295;	C0PSK1_PICSI SubName: Full=Uncharacterized protein {ECO:0000313|EMBL:ACN40791.1};	Reductases with broad range of substrate specificities	GO:0102960,momilactone-A synthase activity; GO:0003674,molecular_function; GO:0003824,catalytic activity; GO:0016491,oxidoreductase activity; GO:0016614,oxidoreductase activity, acting on CH-OH group of donors; GO:0016616,oxidoreductase activity, acting on the CH-OH group of donors, NAD or NADP as acceptor	Enoyl-(Acyl carrier protein) reductase	--	--	--
Cluster-27241.57367	--	unknown [Picea sitchensis]	MT3_PICGL RecName: Full=Metallothionein-like protein EMB30;	A9NK71_PICSI SubName: Full=Uncharacterized protein {ECO:0000313|EMBL:ABK21032.1};	--	GO:0046872,metal ion binding; GO:0003674,molecular_function; GO:0005488,binding; GO:0043167,ion binding; GO:0043169,cation binding	--	--	--	--
Cluster-27241.68976	K13679 granule-bound starch synthase [EC:2.4.1.242] | (RefSeq) granule-bound starch synthase 1, chloroplastic/amyloplastic-like (A)	unknown [Picea sitchensis]	SSG1_MANES RecName: Full=Granule-bound starch synthase 1, chloroplastic/amyloplastic; EC=2.4.1.242; AltName: Full=Granule-bound starch synthase I; Short=GBSS-I; Flags: Precursor;	C0PTH1_PICSI RecName: Full=Starch synthase, chloroplastic/amyloplastic {ECO:0000256|RuleBase:RU361232}; EC=2.4.1.- {ECO:0000256|RuleBase:RU361232};	--	GO:0009501,amyloplast; GO:0009507,chloroplast; GO:0102502,ADP-glucose-starch glucosyltransferase activity; GO:0004373,glycogen (starch) synthase activity; GO:0019252,starch biosynthetic process; GO:0003674,molecular_function; GO:0003824,catalytic activity; GO:0016740,transferase activity; GO:0016757,transferase activity, transferring glycosyl groups; GO:0016758,transferase activity, transferring …	Starch synthase catalytic domain	--	--	--
Cluster-27241.79482	K13691 pathogen-inducible salicylic acid glucosyltransferase [EC:2.4.1.-] | (RefSeq) UDP-glycosyltransferase 74E1-like (A)	unknown [Picea sitchensis]	U74B1_ARATH RecName: Full=UDP-glycosyltransferase 74B1; EC=2.4.1.-; AltName: Full=N-hydroxythioamide S-beta-glucosyltransferase; EC=2.4.1.195; AltName: Full=Thiohydroximate S-glucosyltransferase;	B8LKQ5_PICSI RecName: Full=Glycosyltransferase {ECO:0000256|RuleBase:RU362057}; EC=2.4.1.- {ECO:0000256|RuleBase:RU362057};	UDP-glucuronosyl and UDP-glucosyl transferase	GO:0043231,intracellular membrane-bounded organelle; GO:0080043,quercetin 3-O-glucosyltransferase activity; GO:0080044,quercetin 7-O-glucosyltransferase activity; GO:0047251,thiohydroximate beta-D-glucosyltransferase activity; GO:0102659,UDP-glucose: 4-methylthiobutylhydroximate S-glucosyltransferase activity; GO:0103100,UDP-glucose: 6-methylthiohexylhydroximate S-glucosyltransferase activity; GO…	UDP-glucoronosyl and UDP-glucosyl transferase	--	--	--
Cluster-27241.18603	--	--	--	--	--	--	--	--	--	--
Cluster-27241.71920	K09567 peptidyl-prolyl isomerase H (cyclophilin H) [EC:5.2.1.8] | (RefSeq) peptidyl-prolyl cis-trans isomerase CYP22 (A)	unknown [Picea sitchensis]	CYP22_ARATH RecName: Full=Peptidyl-prolyl cis-trans isomerase CYP22; Short=PPIase CYP22; EC=5.2.1.8; AltName: Full=Cyclophilin of 22 kDa; AltName: Full=Cyclophilin-22;	A0A0C9RPI3_9SPER RecName: Full=Peptidyl-prolyl cis-trans isomerase {ECO:0000256|RuleBase:RU363019}; Short=PPIase {ECO:0000256|RuleBase:RU363019}; EC=5.2.1.8 {ECO:0000256|RuleBase:RU363019};	U-snRNP-associated cyclophilin type peptidyl-prolyl cis-trans isomerase	GO:0005829,cytosol; GO:0005886,plasma membrane; GO:0005773,vacuole; GO:0003755,peptidyl-prolyl cis-trans isomerase activity; GO:0003674,molecular_function; GO:0003824,catalytic activity; GO:0016853,isomerase activity; GO:0016859,cis-trans isomerase activity; GO:0140096,catalytic activity, acting on a protein; GO:0005622,intracellular; GO:0005575,cellular_component; GO:0005623,cell; GO:0005737,cyt…	Cyclophilin type peptidyl-prolyl cis-trans isomerase/CLD	--	--	--
Cluster-27241.49366	K01757 strictosidine synthase [EC:4.3.3.2] | (RefSeq) Calcium-dependent phosphotriesterase superfamily protein (A)	unknown [Picea sitchensis]	SSL4_ARATH RecName: Full=Protein STRICTOSIDINE SYNTHASE-LIKE 4 {ECO:0000303|PubMed:10777701}; Short=AtSSL4 {ECO:0000303|PubMed:10777701}; Flags: Precursor;	B8LRM9_PICSI SubName: Full=Uncharacterized protein {ECO:0000313|EMBL:ABR18309.1};	Predicted alkaloid synthase/Surface mucin Hemomucin	GO:0005783,endoplasmic reticulum; GO:0016020,membrane; GO:0005773,vacuole; GO:0016788,hydrolase activity, acting on ester bonds; GO:0009058,biosynthetic process; GO:0009753,response to jasmonic acid; GO:0009611,response to wounding; GO:0003674,molecular_function; GO:0003824,catalytic activity; GO:0016787,hydrolase activity; GO:0008152,metabolic process; GO:0008150,biological_process; GO:0001101,r…	Strictosidine synthase	--	--	--
Cluster-27241.41485	K08066 nuclear transcription factor Y, gamma | (RefSeq) nuclear transcription factor Y subunit C-4-like (A)	unknown [Picea sitchensis]	NFYC1_ARATH RecName: Full=Nuclear transcription factor Y subunit C-1; Short=AtNF-YC-1; AltName: Full=Transcriptional activator HAP5A;	A9NTJ8_PICSI SubName: Full=Uncharacterized protein {ECO:0000313|EMBL:ABK23959.1};	CCAAT-binding factor, subunit C (HAP5)	GO:0016602,CCAAT-binding factor complex; GO:0005634,nucleus; GO:0003677,DNA binding; GO:0003700,DNA-binding transcription factor activity; GO:0046982,protein heterodimerization activity; GO:2000306,positive regulation of photomorphogenesis; GO:0045893,positive regulation of transcription, DNA-templated; GO:0006355,regulation of transcription, DNA-templated; GO:0006351,transcription, DNA-templated…	Histone-like transcription factor (CBF/NF-Y) and archaeal histone	NF-YC	TF	NF-Y->NF-YC
Cluster-27241.98907	--	unknown [Picea sitchensis]	NHL26_ARATH RecName: Full=NDR1/HIN1-like protein 26 {ECO:0000303|Ref.4};	A9NQ42_PICSI SubName: Full=Uncharacterized protein {ECO:0000313|EMBL:ABK22753.1};	--	GO:0046658,anchored component of plasma membrane; GO:0005789,endoplasmic reticulum membrane; GO:0016021,integral component of membrane; GO:0009506,plasmodesma; GO:0004871,NA; GO:0006952,defense response; GO:0006950,response to stress; GO:0008150,biological_process; GO:0050896,response to stimulus; GO:0005886,plasma membrane; GO:0005575,cellular_component; GO:0016020,membrane; GO:0005623,cell; GO:…	Late embryogenesis abundant protein	--	--	--
Cluster-27241.30042	K01206 alpha-L-fucosidase [EC:3.2.1.51] | (RefSeq) alpha-L-fucosidase 3 (A)	unknown [Picea sitchensis]	GDL61_ARATH RecName: Full=GDSL esterase/lipase At4g01130; EC=3.1.1.-; AltName: Full=Extracellular lipase At4g01130; Flags: Precursor;	A9P0U3_PICSI SubName: Full=Uncharacterized protein {ECO:0000313|EMBL:ABK26504.1};	--	GO:0005576,extracellular region; GO:0016788,hydrolase activity, acting on ester bonds; GO:0016042,lipid catabolic process; GO:0003674,molecular_function; GO:0003824,catalytic activity; GO:0016787,hydrolase activity; GO:0008152,metabolic process; GO:0006629,lipid metabolic process; GO:0008150,biological_process; GO:0009056,catabolic process; GO:0044238,primary metabolic process; GO:0071704,organic…	GDSL-like Lipase/Acylhydrolase	--	--	--
Cluster-27241.92381	--	unknown [Picea sitchensis]	--	D5A931_PICSI SubName: Full=Uncharacterized protein {ECO:0000313|EMBL:ADE76050.1};	--	--	--	--	--	--
Cluster-27241.58089	K11253 histone H3 | (RefSeq) histone H3.2 (A)	predicted protein [Physcomitrella patens]	Y4094_ARATH RecName: Full=BTB/POZ domain-containing protein At4g30940;	A9SYW5_PHYPA SubName: Full=Predicted protein {ECO:0000313|EMBL:EDQ63607.1};	SETA binding protein SB1 and related proteins, contain BTB/POZ domain	GO:0051260,protein homooligomerization; GO:0016567,protein ubiquitination; GO:0008150,biological_process; GO:0009987,cellular process; GO:0022607,cellular component assembly; GO:0016043,cellular component organization; GO:0043933,protein-containing complex subunit organization; GO:0044085,cellular component biogenesis; GO:0051259,protein complex oligomerization; GO:0065003,protein-containing comp…	BTB/POZ domain	--	--	--
Cluster-27241.66655	--	unknown [Picea sitchensis]	FAX3_ARATH RecName: Full=Protein FATTY ACID EXPORT 3, chloroplastic {ECO:0000303|PubMed:25646734}; Short=At-FAX3 {ECO:0000303|PubMed:25646734}; Flags: Precursor;	B8LLD9_PICSI SubName: Full=Uncharacterized protein {ECO:0000313|EMBL:ABR16469.1};	--	GO:0009507,chloroplast; GO:0009941,chloroplast envelope; GO:0009706,chloroplast inner membrane; GO:0016021,integral component of membrane; GO:0005739,mitochondrion; GO:0009536,plastid; GO:0005622,intracellular; GO:0005575,cellular_component; GO:0005623,cell; GO:0005737,cytoplasm; GO:0043231,intracellular membrane-bounded organelle; GO:0043226,organelle; GO:0043227,membrane-bounded organelle; GO:0…	Transmembrane proteins 14C	--	--	--
Cluster-27241.59610	--	--	--	--	--	--	--	--	--	--
Cluster-27241.88115	K01759 lactoylglutathione lyase [EC:4.4.1.5] | (RefSeq) probable lactoylglutathione lyase, chloroplastic (A)	unknown [Picea sitchensis]	SRC2_ARATH RecName: Full=Protein SRC2 homolog {ECO:0000305}; Short=AtSRC2 {ECO:0000303|PubMed:16227454};	A9NPU3_PICSI SubName: Full=Uncharacterized protein {ECO:0000313|EMBL:ABK22654.1};	--	GO:0005783,endoplasmic reticulum; GO:0005789,endoplasmic reticulum membrane; GO:0016021,integral component of membrane; GO:0005886,plasma membrane; GO:0000326,protein storage vacuole; GO:0032586,protein storage vacuole membrane; GO:0006623,protein targeting to vacuole; GO:0008104,protein localization; GO:0006605,protein targeting; GO:0006810,transport; GO:0006886,intracellular protein transport; …	C2 domain	--	--	--
Cluster-27241.106814	--	--	--	--	--	--	--	--	--	--
Cluster-27241.80276	--	--	--	--	--	--	ABA/WDS induced protein	--	--	--
Cluster-27241.70272	K00679 phospholipid:diacylglycerol acyltransferase [EC:2.3.1.158] | (RefSeq) hypothetical protein (A)	unknown [Picea sitchensis]	GDL79_ARATH RecName: Full=GDSL esterase/lipase At5g33370; EC=3.1.1.-; AltName: Full=Extracellular lipase At5g33370; Flags: Precursor;	B8LPL3_PICSI SubName: Full=Uncharacterized protein {ECO:0000313|EMBL:ABR17593.1};	--	GO:0005576,extracellular region; GO:0016788,hydrolase activity, acting on ester bonds; GO:0042335,cuticle development; GO:0016042,lipid catabolic process; GO:0003674,molecular_function; GO:0003824,catalytic activity; GO:0016787,hydrolase activity; GO:0007275,multicellular organism development; GO:0008150,biological_process; GO:0032501,multicellular organismal process; GO:0032502,developmental pro…	GDSL-like Lipase/Acylhydrolase	--	--	--
Cluster-27241.78049	K12831 splicing factor 3B subunit 4 | (RAP-DB) Os05g0427300; Similar to RNA binding protein (Fragment). (A)	unknown [Picea sitchensis]	U1135_ARATH RecName: Full=U11/U12 small nuclear ribonucleoprotein 35 kDa protein; Short=U11/U12 snRNP 35 kDa protein; Short=U11/U12-35K;	A9NWV4_PICSI SubName: Full=Uncharacterized protein {ECO:0000313|EMBL:ABK25115.1};	Splicing factor 3b, subunit 4	GO:0000243,commitment complex; GO:0016607,nuclear speck; GO:0005634,nucleus; GO:0071011,precatalytic spliceosome; GO:0034693,U11/U12 snRNP; GO:0005689,U12-type spliceosomal complex; GO:0003729,mRNA binding; GO:0017069,snRNA binding; GO:0000398,mRNA splicing, via spliceosome; GO:0003674,molecular_function; GO:0003676,nucleic acid binding; GO:0003723,RNA binding; GO:0005488,binding; GO:0097159,orga…	RNA recognition motif. (a.k.a. RRM, RBD, or RNP domain)	--	--	--
Cluster-27241.94085	--	--	--	--	--	--	ABA/WDS induced protein	--	--	--
Cluster-27241.88629	K13420 LRR receptor-like serine/threonine-protein kinase FLS2 [EC:2.7.11.1] | (RefSeq) probable LRR receptor-like serine/threonine-protein kinase At3g47570 isoform X1 (A)	hypothetical protein POPTR_0012s04160g [Populus trichocarpa]	Y2241_ARATH RecName: Full=Putative leucine-rich repeat receptor-like serine/threonine-protein kinase At2g24130; EC=2.7.11.1; Flags: Precursor;	B9I4R9_POPTR SubName: Full=Uncharacterized protein {ECO:0000313|EMBL:EEE95916.2};	--	GO:0016021,integral component of membrane; GO:0005886,plasma membrane; GO:0005524,ATP binding; GO:0004674,protein serine/threonine kinase activity; GO:0000166,nucleotide binding; GO:0003674,molecular_function; GO:0005488,binding; GO:0008144,drug binding; GO:0017076,purine nucleotide binding; GO:0030554,adenyl nucleotide binding; GO:0032553,ribonucleotide binding; GO:0032555,purine ribonucleotide …	Protein kinase domain	--	--	--
Cluster-27241.69788	--	unknown [Picea sitchensis]	--	D5A8X0_PICSI SubName: Full=Uncharacterized protein {ECO:0000313|EMBL:ADE75989.1};	--	--	Plant transcription factor NOZZLE	--	--	--
Cluster-27241.66878	K08286 protein-serine/threonine kinase [EC:2.7.11.-] | (RefSeq) hypothetical protein (A)	unknown [Picea sitchensis]	UNC_ARATH RecName: Full=Serine/threonine-protein kinase UCN {ECO:0000305}; EC=2.7.11.1 {ECO:0000269|PubMed:22927420}; AltName: Full=AGC serine/threonine-protein kinase subfamily 2 member 3 {ECO:0000303|PubMed:13678909}; AltName: Full=Protein UNICORN {ECO:0000303|PubMed:22927420};	A9NPF9_PICSI SubName: Full=Uncharacterized protein {ECO:0000313|EMBL:ABK22520.1};	Putative serine/threonine protein kinase	GO:0005737,cytoplasm; GO:0005634,nucleus; GO:0005886,plasma membrane; GO:0005524,ATP binding; GO:0016301,kinase activity; GO:0004672,protein kinase activity; GO:0004674,protein serine/threonine kinase activity; GO:0008134,transcription factor binding; GO:0080060,integument development; GO:0035556,intracellular signal transduction; GO:0051782,negative regulation of cell division; GO:0036290,protei…	Protein kinase domain	--	--	--
Cluster-27241.69841	--	unknown [Picea sitchensis]	--	A9NZ47_PICSI SubName: Full=Uncharacterized protein {ECO:0000313|EMBL:ABK25908.1};	--	--	--	--	--	--
Cluster-27241.60184	K00432 glutathione peroxidase [EC:1.11.1.9] | (RefSeq) probable phospholipid hydroperoxide glutathione peroxidase isoform X1 (A)	glutathione peroxidase-like protein, partial [Picea sitchensis]	GPX4_GOSHI RecName: Full=Probable phospholipid hydroperoxide glutathione peroxidase; Short=PHGPx; EC=1.11.1.12;	E5F5T0_PICSI RecName: Full=Glutathione peroxidase {ECO:0000256|RuleBase:RU000499}; Flags: Fragment;	Glutathione peroxidase	GO:0005737,cytoplasm; GO:0004602,glutathione peroxidase activity; GO:0047066,phospholipid-hydroperoxide glutathione peroxidase activity; GO:0006979,response to oxidative stress; GO:0003674,molecular_function; GO:0003824,catalytic activity; GO:0004601,peroxidase activity; GO:0016491,oxidoreductase activity; GO:0016209,antioxidant activity; GO:0016684,oxidoreductase activity, acting on peroxide as …	Glutathione peroxidase	--	--	--
Cluster-27241.40451	--	hypothetical protein AXG93_2515s1090 [Marchantia polymorpha subsp. ruderalis]	--	A0A176W6D8_MARPO SubName: Full=Uncharacterized protein {ECO:0000313|EMBL:OAE28171.1};	--	GO:0016021,integral component of membrane; GO:0005575,cellular_component; GO:0016020,membrane; GO:0031224,intrinsic component of membrane; GO:0044425,membrane part	--	--	--	--
Cluster-27241.81619	K09338 homeobox-leucine zipper protein | (RefSeq) homeobox-leucine zipper protein ATHB-6-like isoform X1 (A)	unknown [Picea sitchensis]	ATHB5_ARATH RecName: Full=Homeobox-leucine zipper protein ATHB-5; AltName: Full=HD-ZIP protein ATHB-5; AltName: Full=Homeodomain transcription factor ATHB-5;	D5AB83_PICSI SubName: Full=Uncharacterized protein {ECO:0000313|EMBL:ADE76802.1};	Transcription factor HEX, contains HOX and HALZ domains	GO:0005634,nucleus; GO:0003700,DNA-binding transcription factor activity; GO:0042803,protein homodimerization activity; GO:0043565,sequence-specific DNA binding; GO:0009738,abscisic acid-activated signaling pathway; GO:0045893,positive regulation of transcription, DNA-templated; GO:0009737,response to abscisic acid; GO:0006351,transcription, DNA-templated; GO:0140110,transcription regulator activ…	Homeobox associated leucine zipper	HB-HD-ZIP	TF	HB->HB-HD-ZIP
Cluster-27241.51172	--	RecName: Full=CASP-like protein 2A3; Short=PsCASPL2A3 ADE76091.1 unknown [Picea sitchensis]	CSPL3_PICSI RecName: Full=CASP-like protein 2A3; Short=PsCASPL2A3;	--	--	GO:0016021,integral component of membrane; GO:0005886,plasma membrane; GO:0005575,cellular_component; GO:0016020,membrane; GO:0031224,intrinsic component of membrane; GO:0044425,membrane part; GO:0005623,cell; GO:0044464,cell part; GO:0071944,cell periphery	--	--	--	--
Cluster-27241.40470	--	BTB/POZ-like [Macleaya cordata]	RPT2_ARATH RecName: Full=Root phototropism protein 2; AltName: Full=BTB/POZ domain-containing protein RPT2;	A0A0C9RTU3_9SPER SubName: Full=TSA: Wollemia nobilis Ref_Wollemi_Transcript_13449_2016 transcribed RNA sequence {ECO:0000313|EMBL:JAG87139.1};	--	GO:0005737,cytoplasm; GO:0005634,nucleus; GO:0004871,NA; GO:0009638,phototropism; GO:0016567,protein ubiquitination; GO:0008150,biological_process; GO:0009314,response to radiation; GO:0009416,response to light stimulus; GO:0009605,response to external stimulus; GO:0009606,tropism; GO:0009628,response to abiotic stimulus; GO:0009637,response to blue light; GO:0050896,response to stimulus; GO:0008…	NPH3 family	--	--	--
Cluster-27241.107175	K19861 benzyl alcohol O-benzoyltransferase [EC:2.3.1.196 2.3.1.232] | (RefSeq) benzyl alcohol O-benzoyltransferase (A)	CHAT2 [Pinus tabuliformis]	BEBT_TOBAC RecName: Full=Benzyl alcohol O-benzoyltransferase; EC=2.3.1.196; AltName: Full=Benzoyl coenzyme A:benzyl alcohol benzoyl transferase;	A0A0K0M6X1_PINTB SubName: Full=CHAT2 {ECO:0000313|EMBL:AJP06252.1};	--	GO:0016747,transferase activity, transferring acyl groups other than amino-acyl groups; GO:0003674,molecular_function; GO:0003824,catalytic activity; GO:0016740,transferase activity; GO:0016746,transferase activity, transferring acyl groups	Transferase family	--	--	--
Cluster-27241.77954	K01689 enolase [EC:4.2.1.11] | (RefSeq) enolase (A)	unknown [Picea sitchensis]	ENO1_HEVBR RecName: Full=Enolase 1; EC=4.2.1.11; AltName: Full=2-phospho-D-glycerate hydro-lyase 1; AltName: Full=2-phosphoglycerate dehydratase 1; AltName: Allergen=Hev b 9;	B8LL07_PICSI SubName: Full=Uncharacterized protein {ECO:0000313|EMBL:ABR16337.1};	Enolase	GO:0000015,phosphopyruvate hydratase complex; GO:0000287,magnesium ion binding; GO:0004634,phosphopyruvate hydratase activity; GO:0006096,glycolytic process; GO:0003674,molecular_function; GO:0005488,binding; GO:0046872,metal ion binding; GO:0043167,ion binding; GO:0043169,cation binding; GO:0003824,catalytic activity; GO:0016829,lyase activity; GO:0016835,carbon-oxygen lyase activity; GO:0016836…	Enolase, C-terminal TIM barrel domain	--	--	--
Cluster-27241.93754	K17756 long-chain-alcohol oxidase [EC:1.1.3.20] | (RefSeq) long-chain-alcohol oxidase FAO2 (A)	unknown [Picea sitchensis]	FAO1_LOTJA RecName: Full=Long-chain-alcohol oxidase FAO1; EC=1.1.3.20; AltName: Full=Long-chain fatty alcohol oxidase 1;	B8LQ84_PICSI RecName: Full=Long-chain-alcohol oxidase {ECO:0000256|PIRNR:PIRNR028937}; EC=1.1.3.20 {ECO:0000256|PIRNR:PIRNR028937};	--	GO:0016021,integral component of membrane; GO:0050660,flavin adenine dinucleotide binding; GO:0046577,long-chain-alcohol oxidase activity; GO:0006066,alcohol metabolic process; GO:0055114,oxidation-reduction process; GO:0009409,response to cold; GO:0000166,nucleotide binding; GO:0003674,molecular_function; GO:0005488,binding; GO:0036094,small molecule binding; GO:0043167,ion binding; GO:0043168,a…	GMC oxidoreductase	--	--	--
Cluster-27241.31175	--	--	--	--	--	--	--	--	--	--
Cluster-27241.39513	K03860 phosphatidylinositol N-acetylglucosaminyltransferase subunit Q | (RefSeq) N-acetylglucosaminyl-phosphatidylinositol biosynthetic protein gpi1-like (A)	PREDICTED: protein GAST1-like [Malus domestica]	GAST1_SOLLC RecName: Full=Protein GAST1; Flags: Precursor;	A0A251PR26_PRUPE SubName: Full=Uncharacterized protein {ECO:0000313|EMBL:ONI14008.1};	--	GO:0005576,extracellular region; GO:0005575,cellular_component	--	--	--	--
Cluster-27241.64264	K00026 malate dehydrogenase [EC:1.1.1.37] | (RefSeq) malate dehydrogenase, mitochondrial-like (A)	malate dehydrogenase [Pinus pinaster]	MDHM2_ARATH RecName: Full=Malate dehydrogenase 2, mitochondrial {ECO:0000305}; EC=1.1.1.37 {ECO:0000269|PubMed:26203119}; AltName: Full=Mitochondrial MDH2 {ECO:0000303|PubMed:20876337}; Short=mMDH1 {ECO:0000303|PubMed:20876337}; AltName: Full=Mitochondrial NAD-dependent malate dehydrogenase 2 {ECO:0000305}; Short=mNAD-MDH 2 {ECO:0000305}; Short=mtNAD-MDH2 {ECO:0000303|PubMed:20876337}; Flags: Pre…	F4MKL8_PINPS RecName: Full=Malate dehydrogenase {ECO:0000256|RuleBase:RU003405}; EC=1.1.1.37 {ECO:0000256|RuleBase:RU003405};	NAD-dependent malate dehydrogenase	GO:0048046,apoplast; GO:0016020,membrane; GO:0005759,mitochondrial matrix; GO:0005739,mitochondrion; GO:0005507,copper ion binding; GO:0030060,L-malate dehydrogenase activity; GO:0005975,carbohydrate metabolic process; GO:0042742,defense response to bacterium; GO:0006108,malate metabolic process; GO:0006099,tricarboxylic acid cycle; GO:0003674,molecular_function; GO:0005488,binding; GO:0046872,me…	lactate/malate dehydrogenase, alpha/beta C-terminal domain	--	--	--
Cluster-27241.79534	K09838 zeaxanthin epoxidase [EC:1.14.15.21] | (RefSeq) zeaxanthin epoxidase, chloroplastic-like isoform X1 (A)	unknown [Picea sitchensis]	MO2_ARATH RecName: Full=Monooxygenase 2 {ECO:0000303|PubMed:10216258}; Short=AtMO2 {ECO:0000303|PubMed:10216258}; EC=1.14.13.-;	B8LKW3_PICSI SubName: Full=Uncharacterized protein {ECO:0000313|EMBL:ABR16293.1};	Kynurenine 3-monooxygenase and related flavoprotein monooxygenases	GO:0071949,FAD binding; GO:0004497,monooxygenase activity; GO:0002239,response to oomycetes; GO:0044550,secondary metabolite biosynthetic process; GO:0000166,nucleotide binding; GO:0003674,molecular_function; GO:0005488,binding; GO:0036094,small molecule binding; GO:0043167,ion binding; GO:0043168,anion binding; GO:0048037,cofactor binding; GO:0050660,flavin adenine dinucleotide binding; GO:00506…	FAD binding domain	--	--	--
Cluster-27241.83286	K14839 nucleolar protein 16 | (RefSeq) nucleolar protein 16 (A)	unknown [Picea sitchensis]	--	D5ABN2_PICSI SubName: Full=Uncharacterized protein {ECO:0000313|EMBL:ADE76951.1};	Nucleolar protein (NOP16) involved in 60S ribosomal subunit biogenesis	--	Ribosome biogenesis protein Nop16	--	--	--
Cluster-27241.91734	--	hypothetical protein AQUCO_00700920v1 [Aquilegia coerulea]	--	A0A2G5EM91_AQUCA SubName: Full=Uncharacterized protein {ECO:0000313|EMBL:PIA56896.1};	--	--	--	--	--	--
Cluster-27241.79325	K05658 ATP-binding cassette, subfamily B (MDR/TAP), member 1 [EC:7.6.2.2] | (RefSeq) uncharacterized protein LOC111781709 (A)	GA2ox2 [Pinus tabuliformis]	SRG1_ARATH RecName: Full=Protein SRG1; Short=AtSRG1; AltName: Full=Protein SENESCENCE-RELATED GENE 1;	X5CAB3_PINTB SubName: Full=GA2ox2 {ECO:0000313|EMBL:AHW42452.1};	Iron/ascorbate family oxidoreductases	GO:0046872,metal ion binding; GO:0016682,oxidoreductase activity, acting on diphenols and related substances as donors, oxygen as acceptor; GO:0010150,leaf senescence; GO:0003674,molecular_function; GO:0005488,binding; GO:0043167,ion binding; GO:0043169,cation binding; GO:0003824,catalytic activity; GO:0016491,oxidoreductase activity; GO:0016679,oxidoreductase activity, acting on diphenols and re…	non-haem dioxygenase in morphine synthesis N-terminal	--	--	--
Cluster-27241.59073	--	putative auxin-repressed protein [Pinus massoniana]	--	A0A077EMG8_9SPER SubName: Full=Putative auxin-repressed protein {ECO:0000313|EMBL:AIL50244.1};	--	--	--	--	--	--
Cluster-27241.68764	--	--	--	--	--	--	--	--	--	--
Cluster-27241.84080	K08874 transformation/transcription domain-associated protein | (RefSeq) transformation/transcription domain-associated protein-like (A)	PREDICTED: transformation/transcription domain-associated protein-like [Nelumbo nucifera]	ATR_ARATH RecName: Full=Serine/threonine-protein kinase ATR; Short=AtATR; EC=2.7.11.1; AltName: Full=Ataxia telangiectasia-mutated and Rad3-related homolog; AltName: Full=DNA repair protein ATR; AltName: Full=Rad3-like protein; Short=AtRAD3;	A0A1U8AY87_NELNU SubName: Full=transformation/transcription domain-associated protein-like {ECO:0000313|RefSeq:XP_010268349.1};	Histone acetyltransferase SAGA, TRRAP/TRA1 component, PI-3 kinase superfamily	GO:0005634,nucleus; GO:0009506,plasmodesma; GO:0005524,ATP binding; GO:0016301,kinase activity; GO:0004674,protein serine/threonine kinase activity; GO:0006952,defense response; GO:0006281,DNA repair; GO:0006303,double-strand break repair via nonhomologous end joining; GO:0051321,meiotic cell cycle; GO:0032504,multicellular organism reproduction; GO:0033044,regulation of chromosome organization; …	FAT domain	--	--	--
Cluster-27241.57608	--	--	--	--	--	--	--	--	--	--
Cluster-27241.80618	K23260 scopoletin glucosyltransferase [EC:2.4.1.128] | (RefSeq) scopoletin glucosyltransferase (A)	unknown [Picea sitchensis]	UFOG7_FRAAN RecName: Full=UDP-glucose flavonoid 3-O-glucosyltransferase 7 {ECO:0000303|PubMed:18487633}; EC=2.4.1.91 {ECO:0000269|PubMed:18487633}; AltName: Full=Flavonol 3-O-glucosyltransferase 7 {ECO:0000303|PubMed:18487633}; Short=FaGT7 {ECO:0000303|PubMed:18487633};	A9NWC5_PICSI RecName: Full=Glycosyltransferase {ECO:0000256|RuleBase:RU362057}; EC=2.4.1.- {ECO:0000256|RuleBase:RU362057};	UDP-glucuronosyl and UDP-glucosyl transferase	GO:0102360,daphnetin 3-O-glucosyltransferase activity; GO:0047893,flavonol 3-O-glucosyltransferase activity; GO:0102425,myricetin 3-O-glucosyltransferase activity; GO:0008152,metabolic process; GO:0003674,molecular_function; GO:0003824,catalytic activity; GO:0016740,transferase activity; GO:0016757,transferase activity, transferring glycosyl groups; GO:0016758,transferase activity, transferring h…	UDP-glucoronosyl and UDP-glucosyl transferase	--	--	--
Cluster-27241.86994	K20728 vegetative storage protein 2 | (RefSeq) vegetative storage protein 2-like (A)	putative acid phosphatase, partial [Pinus pinaster]	PPA1_SOLLC RecName: Full=Acid phosphatase 1; EC=3.1.3.2; AltName: Full=Apase-1(1); Flags: Precursor;	Q8RVJ4_PINPS SubName: Full=Putative acid phosphatase {ECO:0000313|EMBL:CAC84485.1}; Flags: Fragment;	--	GO:0003993,acid phosphatase activity; GO:0003674,molecular_function; GO:0003824,catalytic activity; GO:0016787,hydrolase activity; GO:0016788,hydrolase activity, acting on ester bonds; GO:0016791,phosphatase activity; GO:0042578,phosphoric ester hydrolase activity	--	--	--	--
Cluster-27241.85833	K16281 RING-H2 zinc finger protein RHA1 | (RefSeq) E3 ubiquitin-protein ligase ATL4-like (A)	RING-H2 zinc finger protein RHA1a [Morus notabilis]	RHA2A_ARATH RecName: Full=E3 ubiquitin-protein ligase RHA2A {ECO:0000305}; EC=2.3.2.27; AltName: Full=RING-H2 finger A2a {ECO:0000303|PubMed:9781696}; AltName: Full=RING-H2 zinc finger protein RHA2a {ECO:0000305}; AltName: Full=RING-type E3 ubiquitin transferase RHA2A {ECO:0000305};	A0A0D6QYK7_ARACU SubName: Full=Uncharacterized protein {ECO:0000313|EMBL:JAG96667.1};	FOG: Predicted E3 ubiquitin ligase	GO:0005737,cytoplasm; GO:0005634,nucleus; GO:0046872,metal ion binding; GO:0061630,ubiquitin protein ligase activity; GO:0004842,ubiquitin-protein transferase activity; GO:0009738,abscisic acid-activated signaling pathway; GO:0009789,positive regulation of abscisic acid-activated signaling pathway; GO:0043161,proteasome-mediated ubiquitin-dependent protein catabolic process; GO:0016567,protein ub…	Ring finger domain	--	--	--
Cluster-27241.56166	K22314 glucosinolate gamma-glutamyl hydrolase [EC:3.4.19.16] | (RefSeq) gamma-glutamyl peptidase 5-like isoform X1 (A)	hypothetical protein AQUCO_01600370v1 [Aquilegia coerulea]	GGP3_ARATH RecName: Full=Gamma-glutamyl peptidase 3 {ECO:0000305}; EC=3.4.19.- {ECO:0000305};	A0A2G5DRC2_AQUCA SubName: Full=Uncharacterized protein {ECO:0000313|EMBL:PIA46049.1};	Predicted glutamine synthetase	GO:0005829,cytosol; GO:0008233,peptidase activity; GO:0019760,glucosinolate metabolic process; GO:0003674,molecular_function; GO:0003824,catalytic activity; GO:0016787,hydrolase activity; GO:0140096,catalytic activity, acting on a protein; GO:0006790,sulfur compound metabolic process; GO:0008152,metabolic process; GO:0006082,organic acid metabolic process; GO:0006807,nitrogen compound metabolic p…	Glutamine amidotransferase class-I	--	--	--
Cluster-27241.76471	K20728 vegetative storage protein 2 | (RefSeq) vegetative storage protein 2-like (A)	unknown [Picea sitchensis]	PPA1_SOLLC RecName: Full=Acid phosphatase 1; EC=3.1.3.2; AltName: Full=Apase-1(1); Flags: Precursor;	A9NPL9_PICSI SubName: Full=Uncharacterized protein {ECO:0000313|EMBL:ABK22580.1};	--	GO:0003993,acid phosphatase activity; GO:0003674,molecular_function; GO:0003824,catalytic activity; GO:0016787,hydrolase activity; GO:0016788,hydrolase activity, acting on ester bonds; GO:0016791,phosphatase activity; GO:0042578,phosphoric ester hydrolase activity	HAD superfamily, subfamily IIIB (Acid phosphatase)	--	--	--
Cluster-27241.56222	K20628 expansin | (RefSeq) hypothetical protein (A)	unknown [Picea sitchensis]	EXPA2_ORYSJ RecName: Full=Expansin-A2; AltName: Full=Alpha-expansin-2; AltName: Full=OsEXP2; AltName: Full=OsEXPA2; AltName: Full=OsaEXPa1.23; AltName: Full=RiExB; AltName: Full=RiExC; Flags: Precursor;	B8LMF3_PICSI SubName: Full=Uncharacterized protein {ECO:0000313|EMBL:ABR16833.1};	--	GO:0005618,cell wall; GO:0005576,extracellular region; GO:0016020,membrane; GO:0009664,plant-type cell wall organization; GO:0008150,biological_process; GO:0009987,cellular process; GO:0016043,cellular component organization; GO:0045229,external encapsulating structure organization; GO:0071554,cell wall organization or biogenesis; GO:0071555,cell wall organization; GO:0071669,plant-type cell wall…	Pollen allergen	--	--	--
Cluster-27241.69996	--	unknown [Picea sitchensis]	--	A9P0H2_PICSI SubName: Full=Uncharacterized protein {ECO:0000313|EMBL:ABK26383.1};	--	--	Senescence regulator	--	--	--
Cluster-27241.68300	--	--	--	--	--	--	--	--	--	--
Cluster-27241.67177	--	unknown [Picea sitchensis]	--	C0PT70_PICSI SubName: Full=Uncharacterized protein {ECO:0000313|EMBL:ACN41010.1};	--	--	Proline-rich nuclear receptor coactivator motif	--	--	--
Cluster-27241.71825	K22849 diacylglycerol O-acyltransferase 3, plant [EC:2.3.1.20] | (RefSeq) diacylglycerol O-acyltransferase 3, cytosolic (A)	unknown [Picea sitchensis]	DGAT3_ARATH RecName: Full=Diacylglycerol O-acyltransferase 3, cytosolic {ECO:0000305}; Short=AtDGAT3 {ECO:0000303|PubMed:22760209}; EC=2.3.1.20 {ECO:0000305|PubMed:22760209};	A9NRE5_PICSI SubName: Full=Uncharacterized protein {ECO:0000313|EMBL:ABK23206.1};	--	GO:0005829,cytosol; GO:0004144,diacylglycerol O-acyltransferase activity; GO:0006071,glycerol metabolic process; GO:0019432,triglyceride biosynthetic process; GO:0003674,molecular_function; GO:0003824,catalytic activity; GO:0008374,O-acyltransferase activity; GO:0016411,acylglycerol O-acyltransferase activity; GO:0016740,transferase activity; GO:0016746,transferase activity, transferring acyl gro…	Thioredoxin-like [2Fe-2S] ferredoxin	--	--	--
Cluster-27241.65971	--	--	SUS3_ARATH RecName: Full=Sucrose synthase 3; Short=AtSUS3; EC=2.4.1.13; AltName: Full=Sucrose-UDP glucosyltransferase 3;	--	--	GO:0016157,sucrose synthase activity; GO:0010555,response to mannitol; GO:0009414,response to water deprivation; GO:0010431,seed maturation; GO:0005982,starch metabolic process; GO:0005985,sucrose metabolic process; GO:0003674,molecular_function; GO:0003824,catalytic activity; GO:0008194,UDP-glycosyltransferase activity; GO:0016740,transferase activity; GO:0016757,transferase activity, transferri…	--	--	--	--
Cluster-27241.77824	--	--	--	--	--	--	--	--	--	--
Cluster-27241.95047	--	unknown [Picea sitchensis]	--	A9P1W7_PICSI SubName: Full=Uncharacterized protein {ECO:0000313|EMBL:ABK26878.1};	--	GO:0016021,integral component of membrane; GO:0005575,cellular_component; GO:0016020,membrane; GO:0031224,intrinsic component of membrane; GO:0044425,membrane part	Sap, sulfolipid-1-addressing protein	--	--	--
Cluster-27241.82234	K01184 polygalacturonase [EC:3.2.1.15] | (RefSeq) polygalacturonase At1g48100 (A)	PREDICTED: polygalacturonase At1g48100 isoform X1 [Elaeis guineensis]	PGLR4_ARATH RecName: Full=Polygalacturonase At1g48100; Short=PG; EC=3.2.1.15; AltName: Full=Pectinase At1g48100; Flags: Precursor;	A0A2H3ZEH5_PHODC SubName: Full=polygalacturonase At1g48100-like {ECO:0000313|RefSeq:XP_008812598.1};	--	GO:0005618,cell wall; GO:0005576,extracellular region; GO:0004650,polygalacturonase activity; GO:0005975,carbohydrate metabolic process; GO:0009831,plant-type cell wall modification involved in multidimensional cell growth; GO:0003674,molecular_function; GO:0003824,catalytic activity; GO:0004553,hydrolase activity, hydrolyzing O-glycosyl compounds; GO:0016787,hydrolase activity; GO:0016798,hydrol…	Glycosyl hydrolases family 28	--	--	--
Cluster-27241.43301	K15397 3-ketoacyl-CoA synthase [EC:2.3.1.199] | (RefSeq) 3-ketoacyl-CoA synthase 1-like (A)	unknown [Picea sitchensis]	KCS1_ARATH RecName: Full=3-ketoacyl-CoA synthase 1 {ECO:0000303|PubMed:10074711}; Short=KCS-1 {ECO:0000303|PubMed:10074711}; EC=2.3.1.199 {ECO:0000269|PubMed:10074711, ECO:0000269|PubMed:16765910}; AltName: Full=Very long-chain fatty acid condensing enzyme 1 {ECO:0000303|PubMed:10074711}; Short=VLCFA condensing enzyme 1 {ECO:0000303|PubMed:10074711};	D5A7W7_PICSI SubName: Full=Uncharacterized protein {ECO:0000313|EMBL:ADE75636.1};	--	GO:0022626,cytosolic ribosome; GO:0005783,endoplasmic reticulum; GO:0005789,endoplasmic reticulum membrane; GO:0016021,integral component of membrane; GO:0016020,membrane; GO:0102336,3-oxo-arachidoyl-CoA synthase activity; GO:0102337,3-oxo-cerotoyl-CoA synthase activity; GO:0102338,3-oxo-lignoceronyl-CoA synthase activity; GO:0009922,fatty acid elongase activity; GO:0102756,very-long-chain 3-keto…	FAE1/Type III polyketide synthase-like protein	--	--	--
Cluster-27241.81571	--	unknown [Picea sitchensis]	DAD2_PETHY RecName: Full=Probable strigolactone esterase DAD2; Short=3.1.-.-; AltName: Full=Protein DECREASED APICAL DOMINANCE 2;	A9NP75_PICSI SubName: Full=Uncharacterized protein {ECO:0000313|EMBL:ABK22436.1};	--	GO:0016788,hydrolase activity, acting on ester bonds; GO:0010223,secondary shoot formation; GO:1901601,strigolactone biosynthetic process; GO:0003674,molecular_function; GO:0003824,catalytic activity; GO:0016787,hydrolase activity; GO:0001763,morphogenesis of a branching structure; GO:0007275,multicellular organism development; GO:0009653,anatomical structure morphogenesis; GO:0008150,biological_…	alpha/beta hydrolase fold	--	--	--
Cluster-27241.71814	--	--	--	--	--	--	--	--	--	--
Cluster-27241.58068	K08695 anthocyanidin reductase [EC:1.3.1.77] | (RefSeq) anthocyanidin reductase ((2S)-flavan-3-ol-forming) (A)	unknown [Picea sitchensis]	ANR_GINBI RecName: Full=Putative anthocyanidin reductase {ECO:0000303|PubMed:16399014}; Short=GbANR {ECO:0000303|PubMed:16399014}; EC=1.3.1.- {ECO:0000250|UniProtKB:Q5FB34};	B8LRT5_PICSI SubName: Full=Uncharacterized protein {ECO:0000313|EMBL:ABR18365.1};	Flavonol reductase/cinnamoyl-CoA reductase	GO:0050662,coenzyme binding; GO:0016491,oxidoreductase activity; GO:0009813,flavonoid biosynthetic process; GO:0003674,molecular_function; GO:0005488,binding; GO:0048037,cofactor binding; GO:0003824,catalytic activity; GO:0008152,metabolic process; GO:0008150,biological_process; GO:0009058,biosynthetic process; GO:0009812,flavonoid metabolic process; GO:0071704,organic substance metabolic process…	NAD dependent epimerase/dehydratase family	--	--	--
Cluster-27241.98418	K08235 xyloglucan:xyloglucosyl transferase [EC:2.4.1.207] | (RefSeq) hypothetical protein (A)	unknown [Picea sitchensis]	XTH1_SOLLC RecName: Full=Probable xyloglucan endotransglucosylase/hydrolase 1; Short=LeXTH1; EC=2.4.1.207; Flags: Precursor;	D5A9T0_PICSI RecName: Full=Xyloglucan endotransglucosylase/hydrolase {ECO:0000256|RuleBase:RU361120}; EC=2.4.1.207 {ECO:0000256|RuleBase:RU361120};	--	GO:0048046,apoplast; GO:0005618,cell wall; GO:0004553,hydrolase activity, hydrolyzing O-glycosyl compounds; GO:0016762,xyloglucan:xyloglucosyl transferase activity; GO:0042546,cell wall biogenesis; GO:0071555,cell wall organization; GO:0010411,xyloglucan metabolic process; GO:0003674,molecular_function; GO:0003824,catalytic activity; GO:0016787,hydrolase activity; GO:0016798,hydrolase activity, a…	--	--	--	--
Cluster-27241.96387	K24028 salicylic acid 3-hydroxylase [EC:1.14.11.-] | (RefSeq) protein DMR6-LIKE OXYGENASE 2-like (A)	protein DMR6-LIKE OXYGENASE 2-like [Hevea brasiliensis]	FL3H2_ORYSJ RecName: Full=Flavanone 3-dioxygenase 2 {ECO:0000305}; EC=1.14.11.9 {ECO:0000269|PubMed:18413994}; AltName: Full=Flavanone 3-beta-hydroxylase 2 {ECO:0000305}; AltName: Full=Flavanone 3-hydroxylase 2 {ECO:0000303|PubMed:18413994}; Short=OsF3H-2 {ECO:0000303|PubMed:18413994};	F6HKE3_VITVI SubName: Full=Uncharacterized protein {ECO:0000313|EMBL:CCB55365.1};	Iron/ascorbate family oxidoreductases	GO:0031418,L-ascorbic acid binding; GO:0046872,metal ion binding; GO:0045486,naringenin 3-dioxygenase activity; GO:0009813,flavonoid biosynthetic process; GO:0003674,molecular_function; GO:0030246,carbohydrate binding; GO:0005488,binding; GO:0019842,vitamin binding; GO:0031406,carboxylic acid binding; GO:0036094,small molecule binding; GO:0043167,ion binding; GO:0043168,anion binding; GO:0043177,…	non-haem dioxygenase in morphine synthesis N-terminal	--	--	--
Cluster-27241.43057	K01052 lysosomal acid lipase/cholesteryl ester hydrolase [EC:3.1.1.13] | (RefSeq) hypothetical protein (A)	LIP1 [Pinus tabuliformis]	LIP1_ARATH RecName: Full=Triacylglycerol lipase 1; EC=3.1.1.3; Flags: Precursor;	A0A0K0M6Z3_PINTB RecName: Full=Lipase {ECO:0000256|PIRNR:PIRNR000862};	Triglyceride lipase-cholesterol esterase	GO:0005615,extracellular space; GO:0004806,triglyceride lipase activity; GO:0016042,lipid catabolic process; GO:0003674,molecular_function; GO:0003824,catalytic activity; GO:0016298,lipase activity; GO:0016787,hydrolase activity; GO:0016788,hydrolase activity, acting on ester bonds; GO:0052689,carboxylic ester hydrolase activity; GO:0008152,metabolic process; GO:0006629,lipid metabolic process; G…	Partial alpha/beta-hydrolase lipase region	--	--	--
Cluster-27241.73657	K00432 glutathione peroxidase [EC:1.11.1.9] | (RefSeq) probable phospholipid hydroperoxide glutathione peroxidase (A)	glutathione peroxidase 1 [Pinus tabuliformis]	GPX4_CITSI RecName: Full=Probable phospholipid hydroperoxide glutathione peroxidase; Short=PHGPx; EC=1.11.1.12; AltName: Full=Salt-associated protein;	U3GUA7_PINTB RecName: Full=Glutathione peroxidase {ECO:0000256|RuleBase:RU000499};	Glutathione peroxidase	GO:0005737,cytoplasm; GO:0004602,glutathione peroxidase activity; GO:0047066,phospholipid-hydroperoxide glutathione peroxidase activity; GO:0006979,response to oxidative stress; GO:0003674,molecular_function; GO:0003824,catalytic activity; GO:0004601,peroxidase activity; GO:0016491,oxidoreductase activity; GO:0016209,antioxidant activity; GO:0016684,oxidoreductase activity, acting on peroxide as …	Glutathione peroxidase	--	--	--
Cluster-27241.26305	K03283 heat shock 70kDa protein 1/2/6/8 | (Kazusa) Lj0g3v0318919.1; - (A)	PREDICTED: TMV resistance protein N-like [Lupinus angustifolius]	TMVRN_NICGU RecName: Full=TMV resistance protein N;	B8LMX8_PICSI SubName: Full=Uncharacterized protein {ECO:0000313|EMBL:ABR17008.1};	--	GO:0005737,cytoplasm; GO:0043531,ADP binding; GO:0005524,ATP binding; GO:0009626,plant-type hypersensitive response; GO:0007165,signal transduction; GO:0000166,nucleotide binding; GO:0003674,molecular_function; GO:0005488,binding; GO:0017076,purine nucleotide binding; GO:0030554,adenyl nucleotide binding; GO:0032553,ribonucleotide binding; GO:0032555,purine ribonucleotide binding; GO:0032559,aden…	TIR domain	--	--	--
Cluster-27241.63574	--	--	--	--	--	--	--	--	--	--
Cluster-27241.71827	K22849 diacylglycerol O-acyltransferase 3, plant [EC:2.3.1.20] | (RefSeq) diacylglycerol O-acyltransferase 3, cytosolic (A)	unknown [Picea sitchensis]	DGAT3_ARATH RecName: Full=Diacylglycerol O-acyltransferase 3, cytosolic {ECO:0000305}; Short=AtDGAT3 {ECO:0000303|PubMed:22760209}; EC=2.3.1.20 {ECO:0000305|PubMed:22760209};	A9NRE5_PICSI SubName: Full=Uncharacterized protein {ECO:0000313|EMBL:ABK23206.1};	--	GO:0005829,cytosol; GO:0004144,diacylglycerol O-acyltransferase activity; GO:0006071,glycerol metabolic process; GO:0019432,triglyceride biosynthetic process; GO:0003674,molecular_function; GO:0003824,catalytic activity; GO:0008374,O-acyltransferase activity; GO:0016411,acylglycerol O-acyltransferase activity; GO:0016740,transferase activity; GO:0016746,transferase activity, transferring acyl gro…	Thioredoxin-like [2Fe-2S] ferredoxin	--	--	--
Cluster-27241.79368	K20606 mitogen-activated protein kinase kinase kinase ANP1 [EC:2.7.11.25] | (RefSeq) receptor-like serine/threonine-protein kinase SD1-7 isoform X1 (A)	unknown [Picea sitchensis]	CRK29_ARATH RecName: Full=Cysteine-rich receptor-like protein kinase 29; Short=Cysteine-rich RLK29; EC=2.7.11.-; Flags: Precursor;	A0A0C9S6I8_9SPER SubName: Full=TSA: Wollemia nobilis Ref_Wollemi_Transcript_14780_2565 transcribed RNA sequence {ECO:0000313|EMBL:JAG86623.1};	--	GO:0016021,integral component of membrane; GO:0005886,plasma membrane; GO:0005773,vacuole; GO:0005524,ATP binding; GO:0004674,protein serine/threonine kinase activity; GO:0006468,protein phosphorylation; GO:0009737,response to abscisic acid; GO:0000166,nucleotide binding; GO:0003674,molecular_function; GO:0005488,binding; GO:0008144,drug binding; GO:0017076,purine nucleotide binding; GO:0030554,a…	Protein kinase domain	--	--	--
Cluster-27241.98367	K14760 o-succinylbenzoate---CoA ligase [EC:6.2.1.26] | (RefSeq) 2-succinylbenzoate--CoA ligase, chloroplastic/peroxisomal (A)	hypothetical protein [Beta vulgaris subsp. vulgaris]	MENE_ARATH RecName: Full=2-succinylbenzoate--CoA ligase, chloroplastic/peroxisomal; EC=6.2.1.26; AltName: Full=Acyl-activating enzyme 14; AltName: Full=O-succinylbenzoyl-CoA ligase; Flags: Precursor;	F4NCF7_BETVU SubName: Full=Uncharacterized protein {ECO:0000313|EMBL:CCA65974.1};	FOG: Reverse transcriptase	GO:0009507,chloroplast; GO:0031969,chloroplast membrane; GO:0016021,integral component of membrane; GO:0005778,peroxisomal membrane; GO:0005777,peroxisome; GO:0005524,ATP binding; GO:0008756,o-succinylbenzoate-CoA ligase activity; GO:0042372,phylloquinone biosynthetic process; GO:0000166,nucleotide binding; GO:0003674,molecular_function; GO:0005488,binding; GO:0008144,drug binding; GO:0017076,pur…	AMP-binding enzyme	--	--	--
Cluster-27241.37561	--	unknown [Picea sitchensis]	--	B8LNE1_PICSI SubName: Full=Uncharacterized protein {ECO:0000313|EMBL:ABR17171.1};	--	--	--	--	--	--
Cluster-27241.83516	K14411 RNA-binding protein Musashi | (RefSeq) heterogeneous nuclear ribonucleoprotein 1-like (A)	unknown [Picea sitchensis]	RNP1_ARATH RecName: Full=Heterogeneous nuclear ribonucleoprotein 1; Short=hnRNP1;	D5A839_PICSI SubName: Full=Uncharacterized protein {ECO:0000313|EMBL:ADE75708.1};	RNA-binding protein musashi/mRNA cleavage and polyadenylation factor I complex, subunit HRP1	GO:0005829,cytosol; GO:0005634,nucleus; GO:0005681,spliceosomal complex; GO:0003729,mRNA binding; GO:0006397,mRNA processing; GO:0051028,mRNA transport; GO:1901000,regulation of response to salt stress; GO:2000070,regulation of response to water deprivation; GO:0008380,RNA splicing; GO:0010228,vegetative to reproductive phase transition of meristem; GO:0003674,molecular_function; GO:0003676,nucle…	RNA recognition motif. (a.k.a. RRM, RBD, or RNP domain)	--	--	--
Cluster-27241.65338	--	unknown [Picea sitchensis]	DAD2_PETHY RecName: Full=Probable strigolactone esterase DAD2; Short=3.1.-.-; AltName: Full=Protein DECREASED APICAL DOMINANCE 2;	A9NLT8_PICSI SubName: Full=Uncharacterized protein {ECO:0000313|EMBL:ABK21599.1};	--	GO:0016788,hydrolase activity, acting on ester bonds; GO:0010223,secondary shoot formation; GO:1901601,strigolactone biosynthetic process; GO:0003674,molecular_function; GO:0003824,catalytic activity; GO:0016787,hydrolase activity; GO:0001763,morphogenesis of a branching structure; GO:0007275,multicellular organism development; GO:0009653,anatomical structure morphogenesis; GO:0008150,biological_…	alpha/beta hydrolase fold	--	--	--
Cluster-27241.60089	K00411 ubiquinol-cytochrome c reductase iron-sulfur subunit [EC:7.1.1.8] | (RefSeq) cytochrome b-c1 complex subunit Rieske-4, mitochondrial-like (A)	unknown [Picea sitchensis]	UCRI_SOLTU RecName: Full=Cytochrome b-c1 complex subunit Rieske, mitochondrial; EC=1.10.2.2; AltName: Full=Complex III subunit 5; AltName: Full=Rieske iron-sulfur protein; Short=RISP; AltName: Full=Ubiquinol-cytochrome c reductase iron-sulfur subunit; Flags: Precursor;	B8LMH0_PICSI SubName: Full=Uncharacterized protein {ECO:0000313|EMBL:ABR16850.1};	Ubiquinol cytochrome c reductase, subunit RIP1	GO:0016021,integral component of membrane; GO:0005743,mitochondrial inner membrane; GO:0070469,respiratory chain; GO:0051537,2 iron, 2 sulfur cluster binding; GO:0046872,metal ion binding; GO:0008121,ubiquinol-cytochrome-c reductase activity; GO:0003674,molecular_function; GO:0005488,binding; GO:0048037,cofactor binding; GO:0051536,iron-sulfur cluster binding; GO:0051540,metal cluster binding; GO…	Ubiquinol cytochrome reductase transmembrane region	--	--	--
Cluster-27241.60468	K00020 3-hydroxyisobutyrate dehydrogenase [EC:1.1.1.31] | (GenBank) 6-phosphogluconate dehydrogenase-like protein (A)	unknown [Picea sitchensis]	EXOL2_ARATH RecName: Full=Protein EXORDIUM-like 2; Flags: Precursor;	A9NLQ8_PICSI SubName: Full=Uncharacterized protein {ECO:0000313|EMBL:ABK21569.1};	--	GO:0048046,apoplast; GO:0005618,cell wall; GO:0005829,cytosol; GO:0005615,extracellular space; GO:0005794,Golgi apparatus; GO:0009505,plant-type cell wall; GO:0009506,plasmodesma; GO:0005575,cellular_component; GO:0005576,extracellular region; GO:0005623,cell; GO:0030312,external encapsulating structure; GO:0044464,cell part; GO:0071944,cell periphery; GO:0005622,intracellular; GO:0005737,cytopla…	Phosphate-induced protein 1 conserved region	--	--	--
Cluster-27241.78725	--	--	--	--	--	--	--	--	--	--
Cluster-27241.97353	K13071 pheophorbide a oxygenase [EC:1.14.15.17] | (RefSeq) hypothetical protein (A)	PREDICTED: protein TIC 55, chloroplastic [Vitis vinifera]	TIC55_ARATH RecName: Full=Protein TIC 55, chloroplastic; AltName: Full=Translocon at the inner envelope membrane of chloroplasts 55; Short=AtTIC55; AltName: Full=Translocon at the inner envelope membrane of chloroplasts 55-II; Flags: Precursor;	A0A0D6R5Z4_ARACU SubName: Full=Uncharacterized protein {ECO:0000313|EMBL:JAG98126.1};	--	GO:0009507,chloroplast; GO:0009941,chloroplast envelope; GO:0009706,chloroplast inner membrane; GO:0016021,integral component of membrane; GO:0051537,2 iron, 2 sulfur cluster binding; GO:0010277,chlorophyllide a oxygenase [overall] activity; GO:0046872,metal ion binding; GO:0045036,protein targeting to chloroplast; GO:0003674,molecular_function; GO:0005488,binding; GO:0048037,cofactor binding; GO…	Rieske [2Fe-2S] domain	--	--	--
Cluster-27241.37574	K11153 retinol dehydrogenase 12 [EC:1.1.1.300] | (RefSeq) retinol dehydrogenase 12-like (A)	PREDICTED: retinol dehydrogenase 12-like isoform X1 [Nelumbo nucifera]	FEY_ARATH RecName: Full=Dehydrogenase/reductase SDR family member FEY {ECO:0000305}; EC=1.1.-.- {ECO:0000305}; AltName: Full=Protein FOREVER YOUNG {ECO:0000303|PubMed:7849756};	A0A1U8B2V8_NELNU SubName: Full=retinol dehydrogenase 12-like isoform X1 {ECO:0000313|RefSeq:XP_010275076.1};	Dehydrogenases with different specificities (related to short-chain alcohol dehydrogenases)	GO:0005783,endoplasmic reticulum; GO:0016491,oxidoreductase activity; GO:0010073,meristem maintenance; GO:2000024,regulation of leaf development; GO:0003674,molecular_function; GO:0003824,catalytic activity; GO:0009888,tissue development; GO:0008150,biological_process; GO:0032501,multicellular organismal process; GO:0032502,developmental process; GO:0048507,meristem development; GO:0048856,anatom…	short chain dehydrogenase	--	--	--
Cluster-27241.23590	--	--	--	--	--	--	--	--	--	--
Cluster-27241.85238	K20628 expansin | (RefSeq) expansin-A10 (A)	unknown [Picea sitchensis]	EXPA1_ARATH RecName: Full=Expansin-A1; Short=AtEXPA1; AltName: Full=Alpha-expansin-1; Short=At-EXP1; Short=AtEx1; AltName: Full=Ath-ExpAlpha-1.2; Flags: Precursor;	B8LN89_PICSI SubName: Full=Uncharacterized protein {ECO:0000313|EMBL:ABR17119.1};	--	GO:0005618,cell wall; GO:0005576,extracellular region; GO:0016020,membrane; GO:0009664,plant-type cell wall organization; GO:0008150,biological_process; GO:0009987,cellular process; GO:0016043,cellular component organization; GO:0045229,external encapsulating structure organization; GO:0071554,cell wall organization or biogenesis; GO:0071555,cell wall organization; GO:0071669,plant-type cell wall…	Pollen allergen	--	--	--
Cluster-27241.42644	K20303 trafficking protein particle complex subunit 4 | (RefSeq) trafficking protein particle complex subunit 4-like (A)	PREDICTED: trafficking protein particle complex subunit 4-like [Nelumbo nucifera]	--	A0A0D6R8N9_ARACU SubName: Full=Uncharacterized protein {ECO:0000313|EMBL:JAG98285.1};	Transport protein particle (TRAPP) complex subunit	GO:0030008,TRAPP complex; GO:0016192,vesicle-mediated transport; GO:0006810,transport; GO:0008150,biological_process; GO:0051179,localization; GO:0051234,establishment of localization; GO:0005622,intracellular; GO:0005575,cellular_component; GO:0005623,cell; GO:0032991,protein-containing complex; GO:0044424,intracellular part; GO:0044464,cell part; GO:0099023,tethering complex	Sybindin-like family	--	--	--
Cluster-27241.73354	K08237 hydroquinone glucosyltransferase [EC:2.4.1.218] | (RefSeq) hydroquinone glucosyltransferase-like (A)	hypothetical protein 0_1621_01, partial [Pinus radiata]	UFOG5_MANES RecName: Full=Anthocyanidin 3-O-glucosyltransferase 5; EC=2.4.1.115; AltName: Full=Flavonol 3-O-glucosyltransferase 5; AltName: Full=UDP-glucose flavonoid 3-O-glucosyltransferase 5;	H9M8J7_PINRA SubName: Full=Uncharacterized protein {ECO:0000313|EMBL:AEW07443.1}; Flags: Fragment;	UDP-glucuronosyl and UDP-glucosyl transferase	GO:0047213,anthocyanidin 3-O-glucosyltransferase activity; GO:0009718,anthocyanin-containing compound biosynthetic process; GO:0003674,molecular_function; GO:0003824,catalytic activity; GO:0008194,UDP-glycosyltransferase activity; GO:0016740,transferase activity; GO:0016757,transferase activity, transferring glycosyl groups; GO:0016758,transferase activity, transferring hexosyl groups; GO:0035251…	UDP-glucoronosyl and UDP-glucosyl transferase	--	--	--
Cluster-27241.61285	--	unknown [Picea sitchensis]	MT3_PICGL RecName: Full=Metallothionein-like protein EMB30;	A9NL88_PICSI SubName: Full=Uncharacterized protein {ECO:0000313|EMBL:ABK21399.1};	--	GO:0046872,metal ion binding; GO:0003674,molecular_function; GO:0005488,binding; GO:0043167,ion binding; GO:0043169,cation binding	--	--	--	--
Cluster-27241.58738	--	--	--	--	--	--	--	--	--	--
Cluster-27241.75520	K04120 ent-copalyl diphosphate synthase [EC:5.5.1.13] | (RefSeq) ent-copalyl diphosphate synthase, chloroplastic isoform X1 (A)	monoterpene synthase like [Pinus banksiana]	PT30_PINTA RecName: Full=(+)-alpha-pinene synthase, chloroplastic; EC=4.2.3.121; AltName: Full=(+)-(3R:5R)-alpha-pinene synthase; AltName: Full=Synthase II; Flags: Precursor;	R9QMR2_PINBN SubName: Full=Monoterpene synthase like {ECO:0000313|EMBL:AFU73848.1};	--	GO:0009507,chloroplast; GO:0000287,magnesium ion binding; GO:0046872,metal ion binding; GO:0050550,pinene synthase activity; GO:0030955,potassium ion binding; GO:0046248,alpha-pinene biosynthetic process; GO:0033383,geranyl diphosphate metabolic process; GO:0003674,molecular_function; GO:0005488,binding; GO:0043167,ion binding; GO:0043169,cation binding; GO:0003824,catalytic activity; GO:0010333,…	Terpene synthase, N-terminal domain	--	--	--
Cluster-27241.60037	K20628 expansin | (RefSeq) expansin-A8-like precursor (A)	unknown [Picea sitchensis]	EXP10_ARATH RecName: Full=Expansin-A10; Short=AtEXPA10; AltName: Full=Alpha-expansin-10; Short=At-EXP10; Short=AtEx10; AltName: Full=Ath-ExpAlpha-1.1; Flags: Precursor;	B8LRW4_PICSI SubName: Full=Uncharacterized protein {ECO:0000313|EMBL:ABR18394.1};	--	GO:0005618,cell wall; GO:0005576,extracellular region; GO:0016020,membrane; GO:0009664,plant-type cell wall organization; GO:0008150,biological_process; GO:0009987,cellular process; GO:0016043,cellular component organization; GO:0045229,external encapsulating structure organization; GO:0071554,cell wall organization or biogenesis; GO:0071555,cell wall organization; GO:0071669,plant-type cell wall…	--	--	--	--
Cluster-27241.68058	--	--	--	--	--	--	--	--	--	--
Cluster-27241.85716	K13416 brassinosteroid insensitive 1-associated receptor kinase 1 [EC:2.7.10.1 2.7.11.1] | (RefSeq) somatic embryogenesis receptor kinase 4-like (A)	rust resistance kinase Lr10-like [Manihot esculenta]	LRL21_ARATH RecName: Full=LEAF RUST 10 DISEASE-RESISTANCE LOCUS RECEPTOR-LIKE PROTEIN KINASE-like 2.1 {ECO:0000303|PubMed:12805585}; EC=2.7.11.1; AltName: Full=Probable receptor-like serine/threonine-protein kinase LRK10L-2.1 {ECO:0000305}; Flags: Precursor;	A0A0D6QSA8_ARACU SubName: Full=Uncharacterized protein {ECO:0000313|EMBL:JAG93241.1};	Serine/threonine protein kinase	GO:0016021,integral component of membrane; GO:0005524,ATP binding; GO:0004674,protein serine/threonine kinase activity; GO:0000166,nucleotide binding; GO:0003674,molecular_function; GO:0005488,binding; GO:0008144,drug binding; GO:0017076,purine nucleotide binding; GO:0030554,adenyl nucleotide binding; GO:0032553,ribonucleotide binding; GO:0032555,purine ribonucleotide binding; GO:0032559,adenyl r…	Protein kinase domain	--	--	--
Cluster-27241.46046	K15718 linoleate 9S-lipoxygenase [EC:1.13.11.58] | (RefSeq) linoleate 9S-lipoxygenase 5, chloroplastic-like (A)	unknown [Picea sitchensis]	LOX1_ORYSJ RecName: Full=Linoleate 9S-lipoxygenase 1; EC=1.13.11.58; AltName: Full=9-lipoxygenase; AltName: Full=Lipoxygenase 1; AltName: Full=r9-LOX1;	B8LLK5_PICSI SubName: Full=Uncharacterized protein {ECO:0000313|EMBL:ABR16535.1};	--	GO:0005737,cytoplasm; GO:0046872,metal ion binding; GO:0016702,oxidoreductase activity, acting on single donors with incorporation of molecular oxygen, incorporation of two atoms of oxygen; GO:0031408,oxylipin biosynthetic process; GO:0003674,molecular_function; GO:0005488,binding; GO:0043167,ion binding; GO:0043169,cation binding; GO:0003824,catalytic activity; GO:0016491,oxidoreductase activity…	Lipoxygenase	--	--	--
Cluster-27241.67716	K00660 chalcone synthase [EC:2.3.1.74] | (RefSeq) CHS13; chalcone synthase 13 (A)	RecName: Full=Chalcone synthase; AltName: Full=Naringenin-chalcone synthase CAA43166.1 chalcone synthase [Pinus sylvestris]	CHSY_PINSY RecName: Full=Chalcone synthase; EC=2.3.1.74; AltName: Full=Naringenin-chalcone synthase;	A9NT16_PICSI SubName: Full=Chalcone synthase {ECO:0000313|EMBL:AEN84251.1};	--	GO:0016210,naringenin-chalcone synthase activity; GO:0009813,flavonoid biosynthetic process; GO:0003674,molecular_function; GO:0003824,catalytic activity; GO:0016740,transferase activity; GO:0016746,transferase activity, transferring acyl groups; GO:0016747,transferase activity, transferring acyl groups other than amino-acyl groups; GO:0008152,metabolic process; GO:0008150,biological_process; GO:…	Chalcone and stilbene synthases, C-terminal domain	--	--	--
Cluster-27241.65034	K05953 nicotianamine synthase [EC:2.5.1.43] | (RefSeq) nicotianamine synthase (A)	PREDICTED: nicotianamine synthase [Nelumbo nucifera]	NAS4_ARATH RecName: Full=Probable nicotianamine synthase 4; EC=2.5.1.43; AltName: Full=S-adenosyl-L-methionine:S-adenosyl-L-methionine:S-adenosyl-methionine 3-amino-3-carboxypropyltransferase 4;	A0A1U8AJY2_NELNU SubName: Full=nicotianamine synthase {ECO:0000313|RefSeq:XP_010267997.1};	--	GO:0030410,nicotianamine synthase activity; GO:0030418,nicotianamine biosynthetic process; GO:0010233,phloem transport; GO:0009555,pollen development; GO:0009860,pollen tube growth; GO:0003674,molecular_function; GO:0003824,catalytic activity; GO:0016740,transferase activity; GO:0016765,transferase activity, transferring alkyl or aryl (other than methyl) groups; GO:0008152,metabolic process; GO:0…	Nicotianamine synthase protein	--	--	--
Cluster-27241.43361	K01638 malate synthase [EC:2.3.3.9] | (RefSeq) malate synthase, glyoxysomal-like (A)	unknown [Picea sitchensis]	MASY_ARATH RecName: Full=Malate synthase {ECO:0000303|PubMed:15272001}; EC=2.3.3.9 {ECO:0000269|PubMed:15272001};	B8LRM2_PICSI RecName: Full=Malate synthase {ECO:0000256|RuleBase:RU000555}; EC=2.3.3.9 {ECO:0000256|RuleBase:RU000555};	Malate synthase	GO:0005737,cytoplasm; GO:0009514,glyoxysome; GO:0004474,malate synthase activity; GO:0006097,glyoxylate cycle; GO:0006099,tricarboxylic acid cycle; GO:0003674,molecular_function; GO:0003824,catalytic activity; GO:0016740,transferase activity; GO:0016746,transferase activity, transferring acyl groups; GO:0046912,transferase activity, transferring acyl groups, acyl groups converted into alkyl on tr…	Malate synthase	--	--	--
Cluster-27241.78931	K16280 E3 ubiquitin-protein ligase RGLG [EC:2.3.2.27] | (RefSeq) E3 ubiquitin-protein ligase RGLG2 (A)	unknown [Picea sitchensis]	RGLG1_ARATH RecName: Full=E3 ubiquitin-protein ligase RGLG1 {ECO:0000305}; EC=2.3.2.27 {ECO:0000305}; AltName: Full=RING domain ligase 1 {ECO:0000303|PubMed:17586653};	A9NUP8_PICSI SubName: Full=Uncharacterized protein {ECO:0000313|EMBL:ABK24359.1};	Copine	GO:0005634,nucleus; GO:0005886,plasma membrane; GO:0046872,metal ion binding; GO:0004842,ubiquitin-protein transferase activity; GO:0009738,abscisic acid-activated signaling pathway; GO:0080148,negative regulation of response to water deprivation; GO:0009789,positive regulation of abscisic acid-activated signaling pathway; GO:0070534,protein K63-linked ubiquitination; GO:0003674,molecular_functio…	--	--	--	--
Cluster-27241.75599	--	unknown [Picea sitchensis]	--	A9NWL3_PICSI SubName: Full=Uncharacterized protein {ECO:0000313|EMBL:ABK25024.1};	--	GO:0016021,integral component of membrane; GO:0005575,cellular_component; GO:0016020,membrane; GO:0031224,intrinsic component of membrane; GO:0044425,membrane part	--	--	--	--
Cluster-27241.37330	--	unknown [Picea sitchensis]	--	A9P242_PICSI SubName: Full=Uncharacterized protein {ECO:0000313|EMBL:ABK26953.1};	--	--	PAR1 protein	--	--	--
Cluster-27241.66247	K08867 WNK lysine deficient protein kinase [EC:2.7.11.1] | (RefSeq) probable serine/threonine-protein kinase WNK9 (A)	unknown [Picea sitchensis]	WNK1_ORYSI RecName: Full=Probable serine/threonine-protein kinase WNK1; Short=OsWNK1; EC=2.7.11.1; AltName: Full=Mitogen-activated protein kinase kinase 1; AltName: Full=Protein kinase with no lysine 1;	C0PSG2_PICSI SubName: Full=Uncharacterized protein {ECO:0000313|EMBL:ACN40752.1};	Serine/threonine protein kinase	GO:0005524,ATP binding; GO:0004674,protein serine/threonine kinase activity; GO:0000166,nucleotide binding; GO:0003674,molecular_function; GO:0005488,binding; GO:0008144,drug binding; GO:0017076,purine nucleotide binding; GO:0030554,adenyl nucleotide binding; GO:0032553,ribonucleotide binding; GO:0032555,purine ribonucleotide binding; GO:0032559,adenyl ribonucleotide binding; GO:0035639,purine ri…	Protein kinase domain	--	--	--
Cluster-27241.71821	K13993 HSP20 family protein | (RefSeq) 18.1 kDa class I heat shock protein-like (A)	hypothetical protein CL428Contig1_02, partial [Pinus taeda]	HSP16_SOYBN RecName: Full=18.5 kDa class I heat shock protein; AltName: Full=HSP 18.5;	H9VKH2_PINTA SubName: Full=Uncharacterized protein {ECO:0000313|EMBL:AFG50265.1}; Flags: Fragment;	Molecular chaperone (small heat-shock protein Hsp26/Hsp42)	GO:0005737,cytoplasm; GO:0005622,intracellular; GO:0005575,cellular_component; GO:0005623,cell; GO:0044424,intracellular part; GO:0044464,cell part	--	--	--	--
Cluster-27241.55933	K13448 calcium-binding protein CML | (RefSeq) probable calcium-binding protein CML25 (A)	PREDICTED: probable calcium-binding protein CML25 [Citrus sinensis]	CML25_ARATH RecName: Full=Probable calcium-binding protein CML25; AltName: Full=Calmodulin-like protein 25;	A0A0D6QZ05_ARACU SubName: Full=Uncharacterized protein {ECO:0000313|EMBL:JAG95248.1};	Calmodulin and related proteins (EF-Hand superfamily)	GO:0005737,cytoplasm; GO:0005634,nucleus; GO:0005509,calcium ion binding; GO:0009409,response to cold; GO:0048767,root hair elongation; GO:0003674,molecular_function; GO:0005488,binding; GO:0046872,metal ion binding; GO:0043167,ion binding; GO:0043169,cation binding; GO:0006950,response to stress; GO:0008150,biological_process; GO:0009266,response to temperature stimulus; GO:0009628,response to a…	EF hand	--	--	--
Cluster-27241.111198	--	PREDICTED: uncharacterized protein LOC103696084 [Phoenix dactylifera]	--	A0A2H3WZ13_PHODC SubName: Full=uncharacterized protein LOC103696084 {ECO:0000313|RefSeq:XP_008775834.1};	Nuclear localization sequence binding protein	--	--	--	--	--
Cluster-27241.49659	K20043 clathrin coat assembly protein AP180 | (GenBank) clathrin assembly protein (A)	unknown [Picea sitchensis]	CAP16_ARATH RecName: Full=Putative clathrin assembly protein At4g40080;	A9NW02_PICSI SubName: Full=Uncharacterized protein {ECO:0000313|EMBL:ABK24813.1};	Clathrin assembly protein AP180 and related proteins, contain ENTH domain	GO:0005905,clathrin-coated pit; GO:0030136,clathrin-coated vesicle; GO:0005794,Golgi apparatus; GO:0005543,phospholipid binding; GO:0006897,endocytosis; GO:0003674,molecular_function; GO:0005488,binding; GO:0008289,lipid binding; GO:0043167,ion binding; GO:0043168,anion binding; GO:0016192,vesicle-mediated transport; GO:0006810,transport; GO:0008150,biological_process; GO:0051179,localization; GO…	ANTH domain	--	--	--
Cluster-27241.57444	--	unknown [Picea sitchensis]	DRL29_ARATH RecName: Full=Probable disease resistance protein At4g33300;	B8LKC3_PICSI SubName: Full=Uncharacterized protein {ECO:0000313|EMBL:ABR16103.1};	--	GO:0048046,apoplast; GO:0043531,ADP binding; GO:0005524,ATP binding; GO:0042742,defense response to bacterium; GO:0000166,nucleotide binding; GO:0003674,molecular_function; GO:0005488,binding; GO:0017076,purine nucleotide binding; GO:0030554,adenyl nucleotide binding; GO:0032553,ribonucleotide binding; GO:0032555,purine ribonucleotide binding; GO:0032559,adenyl ribonucleotide binding; GO:0036094,…	--	--	--	--
Cluster-27241.54649	--	--	--	--	--	--	--	--	--	--
Cluster-27241.71061	K22849 diacylglycerol O-acyltransferase 3, plant [EC:2.3.1.20] | (RefSeq) diacylglycerol O-acyltransferase 3, cytosolic (A)	unknown [Picea sitchensis]	DGAT3_ARATH RecName: Full=Diacylglycerol O-acyltransferase 3, cytosolic {ECO:0000305}; Short=AtDGAT3 {ECO:0000303|PubMed:22760209}; EC=2.3.1.20 {ECO:0000305|PubMed:22760209};	A9NRE5_PICSI SubName: Full=Uncharacterized protein {ECO:0000313|EMBL:ABK23206.1};	--	GO:0005829,cytosol; GO:0004144,diacylglycerol O-acyltransferase activity; GO:0006071,glycerol metabolic process; GO:0019432,triglyceride biosynthetic process; GO:0003674,molecular_function; GO:0003824,catalytic activity; GO:0008374,O-acyltransferase activity; GO:0016411,acylglycerol O-acyltransferase activity; GO:0016740,transferase activity; GO:0016746,transferase activity, transferring acyl gro…	Thioredoxin-like [2Fe-2S] ferredoxin	--	--	--
Cluster-27241.64631	K00660 chalcone synthase [EC:2.3.1.74] | (RefSeq) chalcone synthase 9-like (A)	pinocembrin chalcone synthase [Pinus densiflora]	CHSY_PINST RecName: Full=Chalcone synthase; EC=2.3.1.74; AltName: Full=Naringenin-chalcone synthase;	T1WVA3_9SPER SubName: Full=Pinocembrin chalcone synthase {ECO:0000313|EMBL:AGU43679.1};	--	GO:0016210,naringenin-chalcone synthase activity; GO:0009813,flavonoid biosynthetic process; GO:0003674,molecular_function; GO:0003824,catalytic activity; GO:0016740,transferase activity; GO:0016746,transferase activity, transferring acyl groups; GO:0016747,transferase activity, transferring acyl groups other than amino-acyl groups; GO:0008152,metabolic process; GO:0008150,biological_process; GO:…	--	--	--	--
Cluster-27241.40910	--	hypothetical protein CCACVL1_01764 [Corchorus capsularis]	Y3264_ARATH RecName: Full=Putative UPF0481 protein At3g02645;	A0A1R3KFX3_COCAP SubName: Full=Uncharacterized protein {ECO:0000313|EMBL:OMP05983.1};	--	GO:0016021,integral component of membrane; GO:0005575,cellular_component; GO:0016020,membrane; GO:0031224,intrinsic component of membrane; GO:0044425,membrane part	Plant protein of unknown function	--	--	--
Cluster-27241.89540	K09841 xanthoxin dehydrogenase [EC:1.1.1.288] | (RefSeq) xanthoxin dehydrogenase-like isoform X1 (A)	unknown [Picea sitchensis]	SDR2A_ARATH RecName: Full=Short-chain dehydrogenase reductase 2a; Short=AtSDR2a; EC=1.1.1.-;	A9NUM5_PICSI SubName: Full=Uncharacterized protein {ECO:0000313|EMBL:ABK24336.1};	Reductases with broad range of substrate specificities	GO:0016491,oxidoreductase activity; GO:0003674,molecular_function; GO:0003824,catalytic activity	Enoyl-(Acyl carrier protein) reductase	--	--	--
Cluster-27241.71832	K22849 diacylglycerol O-acyltransferase 3, plant [EC:2.3.1.20] | (RefSeq) uncharacterized protein LOC105035148 (A)	unknown [Picea sitchensis]	DGAT3_ARATH RecName: Full=Diacylglycerol O-acyltransferase 3, cytosolic {ECO:0000305}; Short=AtDGAT3 {ECO:0000303|PubMed:22760209}; EC=2.3.1.20 {ECO:0000305|PubMed:22760209};	A9NRE5_PICSI SubName: Full=Uncharacterized protein {ECO:0000313|EMBL:ABK23206.1};	--	GO:0005829,cytosol; GO:0004144,diacylglycerol O-acyltransferase activity; GO:0006071,glycerol metabolic process; GO:0019432,triglyceride biosynthetic process; GO:0003674,molecular_function; GO:0003824,catalytic activity; GO:0008374,O-acyltransferase activity; GO:0016411,acylglycerol O-acyltransferase activity; GO:0016740,transferase activity; GO:0016746,transferase activity, transferring acyl gro…	--	--	--	--
Cluster-27241.73446	--	--	--	--	--	--	Fn3 associated	--	--	--
Cluster-27241.87764	--	PREDICTED: uncharacterized protein LOC103991249 [Musa acuminata subsp. malaccensis]	--	M0TG35_MUSAM SubName: Full=Uncharacterized protein {ECO:0000313|EnsemblPlants:GSMUA_Achr7P09470_001};	--	--	Protein of unknown function (DUF1677)	--	--	--
Cluster-27241.103781	K04708 3-dehydrosphinganine reductase [EC:1.1.1.102] | (RefSeq) 3-dehydrosphinganine reductase TSC10A-like (A)	unknown [Picea sitchensis]	TC10B_ARATH RecName: Full=3-dehydrosphinganine reductase TSC10B; EC=1.1.1.102; AltName: Full=3-ketodihydrosphingosine reductase; Short=KDS reductase; AltName: Full=3-ketosphinganine reductase;	A9NZ20_PICSI SubName: Full=Uncharacterized protein {ECO:0000313|EMBL:ABK25881.1};	Predicted 3-ketosphinganine reductase	GO:0005789,endoplasmic reticulum membrane; GO:0016021,integral component of membrane; GO:0047560,3-dehydrosphinganine reductase activity; GO:0030148,sphingolipid biosynthetic process; GO:0003674,molecular_function; GO:0003824,catalytic activity; GO:0016491,oxidoreductase activity; GO:0016614,oxidoreductase activity, acting on CH-OH group of donors; GO:0016616,oxidoreductase activity, acting on th…	short chain dehydrogenase	--	--	--
Cluster-27241.49064	--	unknown [Picea sitchensis]	LOR12_ARATH RecName: Full=Protein LURP-one-related 12;	A9NZY9_PICSI SubName: Full=Uncharacterized protein {ECO:0000313|EMBL:ABK26200.1};	--	--	--	--	--	--
Cluster-27241.81622	--	--	--	--	--	--	--	--	--	--
[truncated: 9,961 more rows]
