# Supplementary material for: Physiological and Transcriptomic Analysis Revealed the Molecular Mechanism of Pinus koraiensis Responses to Light
Source: Int J Mol Sci. 2022 Nov 6;23(21):13608. doi: 10.3390/ijms232113608 (PMC9653891; doi:10.3390/ijms232113608)
Supplement: Supplementary file 1 [file ijms-23-13608-s001.zip › Table S5 The top 20 KEGG enrichment pathways of DEGs in CK vs. L4.xlsx]

## Sheet: Sheet1
Supplemental Table S5. The top 20 KEGG enrichment pathways of DEGs in CK vs. L4
#Kegg_pathway	ko_id	Cluter_frequency	Genome_frequency	P-value	Corrected_P-value	GeneID	KEGG Orthology
Flavonoid biosynthesis	ko00941	112 out of 2229 5.02467474203679%	441 out of 27406 1.60913668539736%	0	0	Cluster-27241.61869;Cluster-27241.62431;Cluster-27241.63895;Cluster-27241.64660;Cluster-27241.75670;Cluster-27241.80805;Cluster-27241.64830;Cluster-27241.78870;Cluster-27241.78876;Cluster-27241.78877;Cluster-27241.95635;Cluster-27241.46657;Cluster-27241.48518;Cluster-27241.50293;Cluster-27241.59323;Cluster-27241.59995;Cluster-27241.62520;Cluster-27241.67714;Cluster-27241.67715;Cluster-27241.67716…	K00475+K00475+K00475+K00475+K00475+K00475+K00588+K00588+K00588+K00588+K00660+K00660+K00660+K00660+K00660+K00660+K00660+K00660+K00660+K00660+K00660+K00660+K00660+K00660+K00660+K00660+K00660+K00660+K00660+K00660+K00660+K00660+K00660+K00660+K00660+K00660+K00660+K00660+K00660+K00660+K00660+K00660+K01859+K01859+K01859+K05277+K05277+K05277+K05278+K05278+K05278+K05278+K05278+K05280+K05280+K05280+K05280+…
Brassinosteroid biosynthesis	ko00905	34 out of 2229 1.52534768954688%	108 out of 27406 0.394074290301394%	1.7919e-12	2.38323e-10	Cluster-27241.61681;Cluster-27241.65192;Cluster-27241.66712;Cluster-27241.66715;Cluster-27241.74450;Cluster-27241.80146;Cluster-27241.51076;Cluster-27241.65191;Cluster-27241.66719;Cluster-27241.86604;Cluster-27241.60279;Cluster-27241.60280;Cluster-27241.80147;Cluster-27241.45392;Cluster-27241.86194;Cluster-27241.96244;Cluster-27241.101092;Cluster-27241.42069;Cluster-27241.43555;Cluster-27241.4802…	K09587+K09587+K09587+K09587+K09587+K09587+K09588+K09588+K09588+K09588+K09591+K09591+K12638+K15639+K15639+K20623+K20623+K20623+K20623+K20623+K20623+K20623+K20623+K20623+K20623+K20623+K20623+K20623+K20623+K20623+K20623+K20623+K20623+K20623
Metabolic pathways	ko01100	1115 out of 2229 50.0224315836698%	11845 out of 27406 43.2204626724075%	9.50642e-12	1.26435e-09	Cluster-27241.105563;Cluster-27241.60178;Cluster-27241.68965;Cluster-27241.68966;Cluster-27241.84936;Cluster-25237.0;Cluster-27241.68401;Cluster-27241.100051;Cluster-27241.100589;Cluster-27241.34769;Cluster-27241.34770;Cluster-27241.94467;Cluster-27241.60469;Cluster-27241.60471;Cluster-27241.79753;Cluster-27241.49108;Cluster-27241.51527;Cluster-27241.59993;Cluster-27241.66563;Cluster-27241.66736;…	K00001+K00001+K00001+K00001+K00001+K00002+K00002+K00016+K00016+K00016+K00016+K00020+K00020+K00020+K00020+K00021+K00021+K00021+K00021+K00021+K00021+K00021+K00021+K00029+K00033+K00059+K00059+K00059+K00059+K00059+K00059+K00074+K00083+K00083+K00083+K00083+K00083+K00088+K00103+K00108+K00108+K00108+K00108+K00108+K00108+K00108+K00108+K00109+K00121+K00121+K00121+K00121+K00128+K00128+K00128+K00128+K00128+…
Biosynthesis of secondary metabolites	ko01110	893 out of 2229 40.0628084342755%	7159 out of 27406 26.1220170765526%	1.90674e-11	2.53597e-09	Cluster-27241.105563;Cluster-27241.60178;Cluster-27241.68965;Cluster-27241.68966;Cluster-27241.84936;Cluster-25237.0;Cluster-27241.68401;Cluster-27241.100051;Cluster-27241.100589;Cluster-27241.34769;Cluster-27241.34770;Cluster-27241.49108;Cluster-27241.51527;Cluster-27241.59993;Cluster-27241.66563;Cluster-27241.66736;Cluster-27241.66737;Cluster-27241.66742;Cluster-27241.74444;Cluster-27241.78286;…	K00001+K00001+K00001+K00001+K00001+K00002+K00002+K00016+K00016+K00016+K00016+K00021+K00021+K00021+K00021+K00021+K00021+K00021+K00021+K00033+K00059+K00059+K00059+K00059+K00059+K00059+K00083+K00083+K00083+K00083+K00083+K00088+K00121+K00121+K00121+K00121+K00128+K00128+K00128+K00128+K00128+K00128+K00128+K00128+K00128+K00128+K00134+K00134+K00162+K00162+K00164+K00166+K00228+K00228+K00276+K00307+K00382+…
Circadian rhythm - plant	ko04712	46 out of 2229 2.06370569762225%	196 out of 27406 0.715171860176604%	4.0917e-11	5.44197e-09	Cluster-27241.95635;Cluster-27241.46657;Cluster-27241.48518;Cluster-27241.50293;Cluster-27241.59323;Cluster-27241.59995;Cluster-27241.62520;Cluster-27241.67714;Cluster-27241.67715;Cluster-27241.67716;Cluster-27241.67717;Cluster-27241.68060;Cluster-27241.68464;Cluster-27241.68655;Cluster-27241.68657;Cluster-27241.70122;Cluster-27241.70123;Cluster-27241.71072;Cluster-27241.71760;Cluster-27241.71761…	K00660+K00660+K00660+K00660+K00660+K00660+K00660+K00660+K00660+K00660+K00660+K00660+K00660+K00660+K00660+K00660+K00660+K00660+K00660+K00660+K00660+K00660+K00660+K00660+K00660+K00660+K00660+K00660+K00660+K00660+K00660+K00660+K03097+K03097+K03115+K03115+K10143+K12120+K12121+K12126+K12126+K12133+K12133+K12133+K12133+K12135
Phenylpropanoid biosynthesis	ko00940	125 out of 2229 5.60789591745177%	871 out of 27406 3.17813617456032%	2.85694e-10	3.79973e-08	Cluster-27241.66751;Cluster-27241.74437;Cluster-27241.74438;Cluster-27241.74440;Cluster-27241.74441;Cluster-27241.106061;Cluster-27241.106971;Cluster-27241.106973;Cluster-27241.114739;Cluster-27241.118613;Cluster-27241.128533;Cluster-27241.1842;Cluster-27241.23373;Cluster-27241.27059;Cluster-27241.27060;Cluster-27241.41670;Cluster-27241.66156;Cluster-27241.68242;Cluster-27241.68352;Cluster-27241.…	K00083+K00083+K00083+K00083+K00083+K00430+K00430+K00430+K00430+K00430+K00430+K00430+K00430+K00430+K00430+K00430+K00430+K00430+K00430+K00430+K00430+K00430+K00430+K00430+K00430+K00588+K00588+K00588+K00588+K01188+K01188+K01188+K01188+K01188+K01188+K01188+K01188+K01188+K01188+K01188+K01188+K01188+K01188+K01188+K01188+K01188+K01904+K01904+K01904+K01904+K05349+K05349+K05349+K05349+K05349+K05349+K05349+…
Flavone and flavonol biosynthesis	ko00944	31 out of 2229 1.39075818752804%	118 out of 27406 0.430562650514486%	3.2741e-09	4.35455e-07	Cluster-27241.101996;Cluster-27241.25913;Cluster-27241.67336;Cluster-27241.67338;Cluster-27241.69610;Cluster-27241.70910;Cluster-27241.72706;Cluster-27241.76412;Cluster-27241.44923;Cluster-27241.66182;Cluster-27241.66184;Cluster-27241.66185;Cluster-27241.66186;Cluster-27241.66187;Cluster-27241.66190;Cluster-27241.66191;Cluster-27241.74738;Cluster-27241.74739;Cluster-27241.92664;Cluster-27241.8062…	K05280+K05280+K05280+K05280+K05280+K05280+K05280+K05280+K13083+K13083+K13083+K13083+K13083+K13083+K13083+K13083+K13083+K13083+K13083+K22771+K22772+K22772+K22772+K22772+K22772+K22772+K22772+K22772+K22772+K22772+K22794
Protein processing in endoplasmic reticulum	ko04141	161 out of 2229 7.22296994167788%	1305 out of 27406 4.76173100780851%	5.51978e-08	7.34131e-06	Cluster-27241.55787;Cluster-27241.60292;Cluster-27241.60293;Cluster-27241.60294;Cluster-27241.60295;Cluster-27241.60302;Cluster-27241.61685;Cluster-27241.78301;Cluster-27241.78307;Cluster-27241.78309;Cluster-27241.66882;Cluster-27241.97139;Cluster-27241.97252;Cluster-25443.0;Cluster-25443.1;Cluster-27241.103625;Cluster-27241.26305;Cluster-27241.40979;Cluster-27241.46714;Cluster-27241.54249;Cluste…	K01456+K01456+K01456+K01456+K01456+K01456+K01456+K01456+K01456+K01456+K03094+K03283+K03283+K03283+K03283+K03283+K03283+K03283+K03283+K03283+K03283+K03283+K03283+K03283+K03283+K03283+K03283+K03283+K03283+K03283+K03347+K03347+K04079+K04079+K04079+K04079+K04079+K04079+K04079+K04079+K04079+K04079+K04523+K08852+K08852+K08852+K08852+K08852+K09487+K09487+K09487+K09518+K09523+K10088+K10950+K10956+K13993+…
Plant hormone signal transduction	ko04075	129 out of 2229 5.78734858681023%	993 out of 27406 3.62329416916004%	6.97585e-08	9.27789e-06	Cluster-27241.38118;Cluster-27241.52578;Cluster-27241.52195;Cluster-27241.100785;Cluster-27241.100931;Cluster-27241.105561;Cluster-27241.110199;Cluster-27241.2698;Cluster-27241.33257;Cluster-27241.37697;Cluster-27241.52944;Cluster-27241.60921;Cluster-27241.63024;Cluster-27241.72240;Cluster-27241.90198;Cluster-27241.100887;Cluster-27241.107646;Cluster-27241.2422;Cluster-27241.36215;Cluster-27241.3…	K12126+K12126+K13413+K13415+K13415+K13415+K13415+K13415+K13415+K13415+K13415+K13415+K13415+K13415+K13415+K13416+K13416+K13416+K13416+K13416+K13416+K13416+K13416+K13416+K13416+K13416+K13416+K13416+K13416+K13416+K13422+K13422+K13422+K13449+K13449+K13449+K13449+K13449+K13449+K13449+K13463+K13464+K13464+K13464+K13464+K13464+K13464+K13464+K13464+K13464+K13464+K13464+K13464+K13464+K13464+K13464+K13464+…
Linoleic acid metabolism	ko00591	27 out of 2229 1.21130551816958%	112 out of 27406 0.408669634386631%	2.26282e-07	3.00955e-05	Cluster-27241.50939;Cluster-27241.63714;Cluster-27241.69302;Cluster-27241.82053;Cluster-27241.59314;Cluster-27241.17076;Cluster-27241.27577;Cluster-27241.3019;Cluster-27241.54476;Cluster-27241.56344;Cluster-27241.56345;Cluster-27241.59935;Cluster-27241.61049;Cluster-27241.62717;Cluster-27241.66015;Cluster-27241.66016;Cluster-27241.66023;Cluster-27241.70034;Cluster-27241.70036;Cluster-27241.72480;…	K00454+K00454+K00454+K00454+K14674+K15718+K15718+K15718+K15718+K15718+K15718+K15718+K15718+K15718+K15718+K15718+K15718+K15718+K15718+K15718+K15718+K15718+K15718+K15718+K15718+K15718+K15718
Carotenoid biosynthesis	ko00906	38 out of 2229 1.70480035890534%	203 out of 27406 0.740713712325768%	1.05209e-06	0.000139928	Cluster-27241.73425;Cluster-27241.58198;Cluster-27241.76751;Cluster-27241.79533;Cluster-27241.79534;Cluster-27241.79535;Cluster-27241.79536;Cluster-27241.79537;Cluster-27241.79542;Cluster-27241.79543;Cluster-27241.79545;Cluster-27241.80670;Cluster-27241.114438;Cluster-27241.91872;Cluster-27241.53291;Cluster-27241.54233;Cluster-27241.62798;Cluster-27241.65159;Cluster-27241.66114;Cluster-27241.6612…	K02291+K09838+K09838+K09838+K09838+K09838+K09838+K09838+K09838+K09838+K09838+K09838+K09840+K09840+K09841+K09841+K09841+K09841+K09841+K09841+K09841+K09841+K09841+K09841+K09841+K09841+K09841+K09841+K09841+K09843+K14595+K14595+K14595+K14595+K15746+K15746+K15746+K17911
Zeatin biosynthesis	ko00908	38 out of 2229 1.70480035890534%	204 out of 27406 0.744362548347077%	1.19287e-06	0.000158652	Cluster-27241.26566;Cluster-27241.6502;Cluster-27241.65258;Cluster-27241.90707;Cluster-27241.128834;Cluster-27241.48268;Cluster-27241.48270;Cluster-27241.95678;Cluster-27241.98103;Cluster-27241.98105;Cluster-27241.46019;Cluster-27241.51518;Cluster-27241.53395;Cluster-27241.67056;Cluster-27241.75191;Cluster-27241.81692;Cluster-27241.81716;Cluster-27241.37558;Cluster-27241.44817;Cluster-27241.45288…	K00279+K00279+K10717+K10717+K13495+K13495+K13495+K13496+K13496+K13496+K13496+K13496+K13496+K13496+K13496+K13496+K13496+K23452+K23452+K23452+K23452+K23452+K23452+K23452+K23452+K23452+K23452+K23452+K23452+K23452+K23452+K23452+K23452+K23452+K23452+K23452+K23452+K23452
alpha-Linolenic acid metabolism	ko00592	56 out of 2229 2.51233737101839%	361 out of 27406 1.31722980369262%	2.22332e-06	0.000295701	Cluster-27241.50939;Cluster-27241.63714;Cluster-27241.69302;Cluster-27241.82053;Cluster-27241.70358;Cluster-27241.73232;Cluster-27241.86364;Cluster-27241.22504;Cluster-27241.57631;Cluster-27241.68150;Cluster-27241.68151;Cluster-27241.68590;Cluster-27241.68591;Cluster-27241.68592;Cluster-27241.68593;Cluster-27241.68594;Cluster-27241.68595;Cluster-27241.72960;Cluster-27241.73326;Cluster-27241.73329…	K00454+K00454+K00454+K00454+K01723+K01723+K01723+K05894+K05894+K05894+K05894+K05894+K05894+K05894+K05894+K05894+K05894+K05894+K05894+K05894+K05894+K07513+K07513+K07513+K07513+K07513+K08241+K10525+K10526+K10527+K14674+K16818+K16818+K16818+K16818+K16818+K16818+K16818+K16818+K16818+K18857+K18857+K18857+K18857+K18857+K18857+K18857+K18857+K18857+K18857+K18857+K18857+K18857+K18857+K18857+K18857
Diterpenoid biosynthesis	ko00904	25 out of 2229 1.12157918349035%	128 out of 27406 0.467051010727578%	3.32606e-05	0.00442366	Cluster-27241.29257;Cluster-27241.59038;Cluster-27241.72316;Cluster-27241.72977;Cluster-27241.75520;Cluster-27241.85504;Cluster-27241.70187;Cluster-27241.70189;Cluster-27241.109126;Cluster-27241.57125;Cluster-27241.82849;Cluster-27241.87439;Cluster-27241.26369;Cluster-27241.45353;Cluster-27241.58856;Cluster-27241.59037;Cluster-27241.61893;Cluster-27241.65464;Cluster-27241.75001;Cluster-27241.7875…	K04120+K04120+K04120+K04120+K04120+K04120+K04122+K04122+K04125+K13070+K13070+K13070+K16086+K16086+K16086+K16086+K16086+K16086+K16086+K16086+K16086+K16086+K16086+K16086+K16086
Nicotinate and nicotinamide metabolism	ko00760	19 out of 2229 0.852400179452669%	88 out of 27406 0.32109756987521%	6.95408e-05	0.00924892	Cluster-27241.57507;Cluster-27241.53634;Cluster-27241.53635;Cluster-27241.51549;Cluster-27241.62099;Cluster-27241.70496;Cluster-27241.70497;Cluster-27241.70499;Cluster-27241.71646;Cluster-27241.72517;Cluster-27241.73786;Cluster-27241.73788;Cluster-27241.83611;Cluster-27241.78986;Cluster-27241.52848;Cluster-27241.74127;Cluster-27241.43312;Cluster-27241.45922;Cluster-27241.91473	K00763+K01240+K01240+K01513+K01513+K01513+K01513+K01513+K01513+K01513+K01513+K01513+K01513+K03426+K03517+K03517+K18551+K18551+K18551
Galactose metabolism	ko00052	68 out of 2229 3.05069537909376%	522 out of 27406 1.9046924031234%	7.7977e-05	0.0103709	Cluster-27241.54262;Cluster-27241.52990;Cluster-27241.53787;Cluster-27241.54495;Cluster-27241.54749;Cluster-27241.54750;Cluster-27241.54752;Cluster-27241.56315;Cluster-27241.59732;Cluster-27241.60903;Cluster-27241.3674;Cluster-27241.101216;Cluster-27241.103364;Cluster-27241.106831;Cluster-27241.34503;Cluster-27241.40906;Cluster-27241.40907;Cluster-27241.40911;Cluster-27241.56814;Cluster-27241.568…	K00844+K00850+K00850+K00850+K00850+K00850+K00850+K00850+K00850+K00850+K01187+K01193+K01193+K01193+K01193+K01193+K01193+K01193+K01193+K01193+K01193+K01193+K01193+K01193+K01193+K01193+K01193+K01193+K01193+K01785+K01785+K01785+K01785+K01785+K01785+K01785+K01785+K06617+K06617+K06617+K06617+K06617+K07407+K07407+K07407+K07407+K07407+K12309+K12309+K12309+K12309+K12309+K12309+K12309+K12309+K12309+K18819+…
Tryptophan metabolism	ko00380	52 out of 2229 2.33288470165994%	383 out of 27406 1.39750419616142%	0.000187513	0.0249392	Cluster-27241.28045;Cluster-27241.28048;Cluster-27241.54162;Cluster-27241.59445;Cluster-27241.68145;Cluster-27241.71561;Cluster-27241.71564;Cluster-27241.71567;Cluster-27241.71573;Cluster-27241.84623;Cluster-27241.72048;Cluster-27241.85051;Cluster-27241.59895;Cluster-27241.24943;Cluster-27241.58045;Cluster-27241.60463;Cluster-27241.77758;Cluster-27241.105338;Cluster-27241.129567;Cluster-27241.788…	K00128+K00128+K00128+K00128+K00128+K00128+K00128+K00128+K00128+K00128+K00382+K00626+K00837+K01593+K01593+K01593+K01593+K03781+K03781+K03781+K03781+K03781+K11816+K11820+K11820+K11820+K11820+K13066+K13066+K13066+K13066+K13066+K13066+K13066+K14085+K14085+K14085+K22450+K22588+K22588+K22588+K22588+K22588+K22588+K22588+K22588+K22588+K22588+K22588+K23947+K23947+K23947
Glycolysis / Gluconeogenesis	ko00010	103 out of 2229 4.62090623598026%	899 out of 27406 3.28030358315697%	0.000254501	0.0338487	Cluster-27241.105563;Cluster-27241.60178;Cluster-27241.68965;Cluster-27241.68966;Cluster-27241.84936;Cluster-25237.0;Cluster-27241.68401;Cluster-27241.100051;Cluster-27241.100589;Cluster-27241.34769;Cluster-27241.34770;Cluster-27241.114156;Cluster-27241.25708;Cluster-27241.25713;Cluster-27241.25715;Cluster-27241.28045;Cluster-27241.28048;Cluster-27241.54162;Cluster-27241.59445;Cluster-27241.68145…	K00001+K00001+K00001+K00001+K00001+K00002+K00002+K00016+K00016+K00016+K00016+K00121+K00121+K00121+K00121+K00128+K00128+K00128+K00128+K00128+K00128+K00128+K00128+K00128+K00128+K00134+K00134+K00162+K00162+K00382+K00844+K00850+K00850+K00850+K00850+K00850+K00850+K00850+K00850+K00850+K00873+K00873+K00927+K00927+K00927+K00927+K00927+K00927+K00927+K00927+K00927+K00927+K00927+K00927+K00927+K00927+K00927+…
Cyanoamino acid metabolism	ko00460	47 out of 2229 2.10856886496187%	341 out of 27406 1.24425308326644%	0.00026339	0.0350309	Cluster-27241.66196;Cluster-27241.95430;Cluster-27241.95433;Cluster-27241.101751;Cluster-27241.101752;Cluster-27241.107488;Cluster-27241.121998;Cluster-27241.13696;Cluster-27241.45517;Cluster-27241.60775;Cluster-27241.60778;Cluster-27241.60779;Cluster-27241.60783;Cluster-27241.60784;Cluster-27241.60789;Cluster-27241.63804;Cluster-27241.72660;Cluster-27241.75678;Cluster-27241.25046;Cluster-27241.5…	K00600+K01188+K01188+K01188+K01188+K01188+K01188+K01188+K01188+K01188+K01188+K01188+K01188+K01188+K01188+K01188+K01188+K01188+K05349+K05349+K05349+K05349+K05349+K05349+K05349+K05349+K05349+K05349+K05349+K05349+K05349+K05350+K08248+K08248+K08248+K08248+K13034+K13051+K16266+K18592+K18592+K22706+K22706+K22706+K22706+K22706+K22706
Arachidonic acid metabolism	ko00590	21 out of 2229 0.942126514131898%	117 out of 27406 0.426913814493177%	0.000460594	0.0612591	Cluster-27241.52051;Cluster-27241.62684;Cluster-27241.63639;Cluster-27241.63640;Cluster-27241.63641;Cluster-27241.65305;Cluster-27241.65307;Cluster-27241.73634;Cluster-27241.73639;Cluster-27241.73648;Cluster-27241.73653;Cluster-27241.73657;Cluster-27241.75153;Cluster-27241.53309;Cluster-27241.61228;Cluster-27241.62683;Cluster-27241.79977;Cluster-27241.59314;Cluster-27241.72916;Cluster-27241.52000…	K00432+K00432+K00432+K00432+K00432+K00432+K00432+K00432+K00432+K00432+K00432+K00432+K00432+K08726+K08726+K08726+K08726+K14674+K15730+K18592+K18592
