# Supplementary material for: Physiological and Transcriptomic Analysis Revealed the Molecular Mechanism of Pinus koraiensis Responses to Light
Source: Int J Mol Sci. 2022 Nov 6;23(21):13608. doi: 10.3390/ijms232113608 (PMC9653891; doi:10.3390/ijms232113608)
Supplement: Supplementary file 1 [file ijms-23-13608-s001.zip › Table S6 The top 20 KEGG enrichment pathways of DEGs in CK vs. In4.xlsx]

## Sheet: Sheet1
Supplemental Table S6. The top 20 KEGG enrichment pathways of DEGs in CK vs. In4
#Kegg_pathway	ko_id	Cluter_frequency	Genome_frequency	P-value	Corrected_P-value	GeneID	KEGG Orthology
Cutin, suberine and wax biosynthesis	ko00073	52 out of 1773 2.93288212069938%	321 out of 27406 1.17127636284025%	8.74537e-10	1.11941e-07	Cluster-27241.105343;Cluster-27241.29298;Cluster-27241.32447;Cluster-27241.59883;Cluster-27241.65412;Cluster-27241.105784;Cluster-27241.16281;Cluster-27241.1736;Cluster-27241.22000;Cluster-27241.32586;Cluster-27241.47237;Cluster-27241.47240;Cluster-27241.50984;Cluster-27241.63699;Cluster-27241.71153;Cluster-27241.88031;Cluster-27241.55840;Cluster-27241.108375;Cluster-27241.109924;Cluster-27241.11…	K13356+K13356+K13356+K15398+K15398+K15400+K15400+K15400+K15400+K15400+K15400+K15400+K15400+K15400+K15400+K15400+K15401+K15402+K15402+K15402+K15402+K15402+K15402+K15402+K15402+K15402+K15402+K15402+K15402+K15402+K15402+K15402+K15404+K15404+K15404+K15404+K15404+K15406+K15406+K15406+K15406+K15406+K15406+K15406+K15406+K15406+K15406+K15406+K17991+K20769+K21995+K21995
Flavonoid biosynthesis	ko00941	62 out of 1773 3.49689791314157%	441 out of 27406 1.60913668539736%	7.04859e-09	9.02219e-07	Cluster-27241.78866;Cluster-27241.59995;Cluster-27241.64631;Cluster-27241.67714;Cluster-27241.67716;Cluster-27241.68655;Cluster-27241.71072;Cluster-27241.71073;Cluster-27241.71770;Cluster-27241.71774;Cluster-27241.71776;Cluster-27241.71778;Cluster-27241.83739;Cluster-27241.82216;Cluster-27241.82218;Cluster-27241.57665;Cluster-27241.58773;Cluster-27241.59850;Cluster-27241.63433;Cluster-27241.63534…	K00588+K00660+K00660+K00660+K00660+K00660+K00660+K00660+K00660+K00660+K00660+K00660+K00660+K01859+K01859+K05277+K05277+K05277+K05277+K05277+K05277+K05277+K05277+K05277+K05277+K05277+K05278+K05278+K05278+K05280+K05280+K05280+K08695+K08695+K08695+K08695+K08695+K08695+K13065+K13065+K13065+K13065+K13065+K13065+K13065+K13065+K13065+K13065+K13065+K13082+K13082+K13082+K13082+K13082+K13083+K13083+K13083+…
Fatty acid elongation	ko00062	23 out of 1773 1.29723632261703%	92 out of 27406 0.335692913960447%	1.42179e-08	1.81989e-06	Cluster-27241.101058;Cluster-27241.63165;Cluster-27241.84829;Cluster-27241.88421;Cluster-27241.96799;Cluster-27241.111290;Cluster-27241.128913;Cluster-27241.128914;Cluster-27241.29945;Cluster-27241.32719;Cluster-27241.33239;Cluster-27241.33240;Cluster-27241.36967;Cluster-27241.37766;Cluster-27241.37767;Cluster-27241.40088;Cluster-27241.43300;Cluster-27241.43301;Cluster-27241.61027;Cluster-27241.6…	K01068+K07512+K07512+K10246+K15397+K15397+K15397+K15397+K15397+K15397+K15397+K15397+K15397+K15397+K15397+K15397+K15397+K15397+K15397+K15397+K15397+K15397+K15397
Carotenoid biosynthesis	ko00906	31 out of 1773 1.74844895657078%	203 out of 27406 0.740713712325768%	7.3292e-06	0.000938138	Cluster-27241.68421;Cluster-27241.73425;Cluster-27241.73426;Cluster-27241.58198;Cluster-27241.76753;Cluster-27241.79534;Cluster-27241.79537;Cluster-27241.92939;Cluster-27241.114438;Cluster-27241.91872;Cluster-27241.65225;Cluster-27241.66504;Cluster-27241.66505;Cluster-27241.66506;Cluster-27241.66508;Cluster-27241.71894;Cluster-27241.77004;Cluster-27241.79731;Cluster-27241.80758;Cluster-27241.8952…	K02291+K02291+K02291+K09838+K09838+K09838+K09838+K09840+K09840+K09840+K09841+K09841+K09841+K09841+K09841+K09841+K09841+K09841+K09841+K09841+K09841+K09841+K09841+K09841+K09841+K09843+K14595+K15746+K15746+K15746+K15746
Glycerolipid metabolism	ko00561	58 out of 1773 3.27129159616469%	499 out of 27406 1.82076917463329%	1.1508e-05	0.00147302	Cluster-25237.0;Cluster-27241.28045;Cluster-27241.28048;Cluster-27241.28049;Cluster-27241.31790;Cluster-27241.59445;Cluster-27241.71561;Cluster-27241.71567;Cluster-27241.84623;Cluster-27241.951;Cluster-27241.101359;Cluster-27241.105588;Cluster-27241.105589;Cluster-27241.106409;Cluster-27241.106860;Cluster-27241.109094;Cluster-27241.24620;Cluster-27241.26289;Cluster-27241.26290;Cluster-27241.26448…	K00002+K00128+K00128+K00128+K00128+K00128+K00128+K00128+K00128+K00679+K00679+K00679+K00679+K00679+K00679+K00679+K00679+K00679+K00679+K00679+K00679+K00679+K00679+K00679+K00679+K00679+K00679+K00679+K00679+K00679+K00679+K00679+K00901+K00901+K00901+K01054+K01054+K06118+K06118+K06119+K06119+K07407+K07407+K07407+K07407+K13508+K13508+K13508+K22849+K22849+K22849+K22849+K22849+K22849+K22849+K22849+K22849+…
MAPK signaling pathway - plant	ko04016	143 out of 1773 8.06542583192329%	1625 out of 27406 5.92935853462745%	9.82911e-05	0.0125813	Cluster-27241.72101;Cluster-27241.72102;Cluster-27241.72105;Cluster-27241.118464;Cluster-27241.105338;Cluster-27241.129567;Cluster-27241.2201;Cluster-27241.52195;Cluster-27241.93250;Cluster-27241.16988;Cluster-27241.35723;Cluster-27241.36215;Cluster-27241.49183;Cluster-27241.51772;Cluster-27241.52946;Cluster-27241.57826;Cluster-27241.58248;Cluster-27241.63797;Cluster-27241.85716;Cluster-27241.884…	K00940+K00940+K00940+K02183+K03781+K03781+K03781+K13413+K13416+K13416+K13416+K13416+K13416+K13416+K13416+K13416+K13416+K13416+K13416+K13416+K13420+K13420+K13420+K13420+K13420+K13420+K13420+K13420+K13420+K13420+K13420+K13420+K13420+K13420+K13420+K13420+K13420+K13420+K13420+K13420+K13420+K13420+K13420+K13420+K13420+K13420+K13420+K13420+K13420+K13420+K13420+K13420+K13420+K13420+K13420+K13420+K13420+…
Plant-pathogen interaction	ko04626	293 out of 1773 16.5256627185561%	3733 out of 27406 13.6211048675473%	0.0001812	0.0231936	Cluster-27241.69459;Cluster-27241.118464;Cluster-27241.98524;Cluster-27241.98525;Cluster-27241.28992;Cluster-11079.2;Cluster-27241.92227;Cluster-27241.75436;Cluster-27241.82051;Cluster-27241.83997;Cluster-27241.49549;Cluster-27241.71306;Cluster-27241.52195;Cluster-27241.93250;Cluster-27241.16988;Cluster-27241.35723;Cluster-27241.36215;Cluster-27241.49183;Cluster-27241.51772;Cluster-27241.52946;Cl…	K01373+K02183+K02358+K02358+K02358+K04079+K04079+K04368+K05391+K05391+K13412+K13412+K13413+K13416+K13416+K13416+K13416+K13416+K13416+K13416+K13416+K13416+K13416+K13416+K13416+K13417+K13420+K13420+K13420+K13420+K13420+K13420+K13420+K13420+K13420+K13420+K13420+K13420+K13420+K13420+K13420+K13420+K13420+K13420+K13420+K13420+K13420+K13420+K13420+K13420+K13420+K13420+K13420+K13420+K13420+K13420+K13420+…
Diterpenoid biosynthesis	ko00904	19 out of 1773 1.07163000564016%	128 out of 27406 0.467051010727578%	0.000582235	0.0745261	Cluster-27241.72316;Cluster-27241.75520;Cluster-27241.85504;Cluster-27241.34433;Cluster-27241.70189;Cluster-27241.74104;Cluster-27241.54049;Cluster-27241.42436;Cluster-27241.57125;Cluster-27241.57126;Cluster-27241.82849;Cluster-27241.87439;Cluster-27241.56326;Cluster-27241.65464;Cluster-27241.78752;Cluster-27241.80307;Cluster-27241.80591;Cluster-27241.81233;Cluster-27241.81530	K04120+K04120+K04120+K04122+K04122+K04123+K04124+K04125+K13070+K13070+K13070+K13070+K16086+K16086+K16086+K16086+K16086+K16086+K16086
Glycosylphosphatidylinositol (GPI)-anchor biosynthesis	ko00563	14 out of 1773 0.789622109419064%	83 out of 27406 0.302853389768664%	0.000834015	0.106754	Cluster-27241.20855;Cluster-27241.111207;Cluster-27241.39513;Cluster-27241.39520;Cluster-27241.39521;Cluster-27241.39522;Cluster-27241.39523;Cluster-27241.49939;Cluster-27241.49940;Cluster-27241.49941;Cluster-27241.88220;Cluster-27241.88221;Cluster-27241.26713;Cluster-27241.16289	K03434+K03860+K03860+K03860+K03860+K03860+K03860+K03860+K03860+K03860+K03860+K03860+K05287+K11001
Circadian rhythm - plant	ko04712	24 out of 1773 1.35363790186125%	196 out of 27406 0.715171860176604%	0.00199285	0.255084	Cluster-27241.59995;Cluster-27241.64631;Cluster-27241.67714;Cluster-27241.67716;Cluster-27241.68655;Cluster-27241.71072;Cluster-27241.71073;Cluster-27241.71770;Cluster-27241.71774;Cluster-27241.71776;Cluster-27241.71778;Cluster-27241.83739;Cluster-27241.88167;Cluster-27241.81364;Cluster-27241.59280;Cluster-27241.38118;Cluster-27241.129229;Cluster-27241.45170;Cluster-27241.45171;Cluster-27241.5136…	K00660+K00660+K00660+K00660+K00660+K00660+K00660+K00660+K00660+K00660+K00660+K00660+K03097+K12118+K12121+K12126+K12133+K12133+K12133+K12133+K12133+K12133+K12135+K12135
Thiamine metabolism	ko00730	14 out of 1773 0.789622109419064%	94 out of 27406 0.342990586003065%	0.0028347	0.362842	Cluster-27241.93832;Cluster-27241.93835;Cluster-27241.93837;Cluster-27241.93186;Cluster-27241.52329;Cluster-27241.31965;Cluster-27241.51903;Cluster-27241.46743;Cluster-27241.46745;Cluster-27241.46746;Cluster-27241.46747;Cluster-27241.71663;Cluster-27241.129062;Cluster-27241.5871	K00878+K00878+K00878+K00939+K00949+K01662+K03147+K14153+K14153+K14153+K14153+K14153+K22911+K22911
Biosynthesis of secondary metabolites	ko01110	513 out of 1773 28.9340101522843%	7159 out of 27406 26.1220170765526%	0.00312016	0.399381	Cluster-27241.68965;Cluster-27241.68966;Cluster-27241.84936;Cluster-25237.0;Cluster-27241.100589;Cluster-27241.34769;Cluster-27241.34770;Cluster-27241.59993;Cluster-27241.74444;Cluster-27241.67402;Cluster-27241.56244;Cluster-27241.64264;Cluster-27241.82444;Cluster-27241.59624;Cluster-27241.74438;Cluster-27241.69167;Cluster-27241.114156;Cluster-27241.25715;Cluster-27241.28045;Cluster-27241.28048;C…	K00001+K00001+K00001+K00002+K00016+K00016+K00016+K00021+K00021+K00025+K00026+K00026+K00026+K00083+K00083+K00088+K00121+K00121+K00128+K00128+K00128+K00128+K00128+K00128+K00128+K00128+K00134+K00134+K00161+K00164+K00218+K00218+K00228+K00318+K00422+K00430+K00430+K00430+K00430+K00430+K00430+K00430+K00430+K00430+K00430+K00430+K00430+K00430+K00430+K00430+K00430+K00430+K00430+K00430+K00430+K00430+K00454+…
Endocytosis	ko04144	64 out of 1773 3.60970107163001%	725 out of 27406 2.64540611544917%	0.00732349	0.937406	Cluster-27241.31729;Cluster-27241.56892;Cluster-27241.56895;Cluster-27241.69965;Cluster-27241.69966;Cluster-27241.69967;Cluster-27241.94381;Cluster-27241.97139;Cluster-27241.97236;Cluster-25443.1;Cluster-27241.103625;Cluster-27241.117006;Cluster-27241.117007;Cluster-27241.17479;Cluster-27241.26227;Cluster-27241.26305;Cluster-27241.54249;Cluster-27241.56391;Cluster-27241.58246;Cluster-27241.59190;…	K01115+K01115+K01115+K01115+K01115+K01115+K03283+K03283+K03283+K03283+K03283+K03283+K03283+K03283+K03283+K03283+K03283+K03283+K03283+K03283+K03283+K03283+K03283+K03283+K03283+K03283+K03283+K03283+K03283+K07889+K07889+K07889+K07901+K12188+K12188+K12195+K12195+K12199+K12472+K12472+K12472+K12472+K12472+K12472+K12472+K12472+K12472+K12472+K12472+K12472+K12486+K12486+K12486+K12486+K12486+K12486+K12486+…
Stilbenoid, diarylheptanoid and gingerol biosynthesis	ko00945	12 out of 1773 0.676818950930626%	86 out of 27406 0.313799897832591%	0.00922992	1	Cluster-27241.78866;Cluster-27241.104830;Cluster-27241.105785;Cluster-27241.108701;Cluster-27241.113587;Cluster-27241.30381;Cluster-27241.38342;Cluster-27241.44812;Cluster-27241.46893;Cluster-27241.53564;Cluster-27241.85997;Cluster-27241.90421	K00588+K13065+K13065+K13065+K13065+K13065+K13065+K13065+K13065+K13065+K13065+K13065
Plant hormone signal transduction	ko04075	83 out of 1773 4.68133107727016%	993 out of 27406 3.62329416916004%	0.0100322	1	Cluster-27241.38118;Cluster-27241.52195;Cluster-27241.100785;Cluster-27241.2698;Cluster-27241.31820;Cluster-27241.33854;Cluster-27241.44826;Cluster-27241.46260;Cluster-27241.93250;Cluster-27241.16988;Cluster-27241.35723;Cluster-27241.36215;Cluster-27241.49183;Cluster-27241.51772;Cluster-27241.52946;Cluster-27241.57826;Cluster-27241.58248;Cluster-27241.63797;Cluster-27241.85716;Cluster-27241.88459…	K12126+K13413+K13415+K13415+K13415+K13415+K13415+K13415+K13416+K13416+K13416+K13416+K13416+K13416+K13416+K13416+K13416+K13416+K13416+K13416+K13422+K13422+K13422+K13422+K13422+K13422+K13422+K13449+K13449+K13449+K13464+K13464+K13464+K13464+K13464+K14432+K14432+K14432+K14486+K14486+K14488+K14488+K14488+K14488+K14488+K14488+K14489+K14490+K14490+K14491+K14491+K14491+K14491+K14493+K14493+K14493+K14493+…
Protein processing in endoplasmic reticulum	ko04141	105 out of 1773 5.92216582064298%	1305 out of 27406 4.76173100780851%	0.0120492	1	Cluster-27241.38105;Cluster-27241.38930;Cluster-27241.38931;Cluster-27241.75040;Cluster-27241.78329;Cluster-27241.94381;Cluster-27241.97139;Cluster-27241.97236;Cluster-25443.1;Cluster-27241.103625;Cluster-27241.117006;Cluster-27241.117007;Cluster-27241.17479;Cluster-27241.26227;Cluster-27241.26305;Cluster-27241.54249;Cluster-27241.56391;Cluster-27241.58246;Cluster-27241.59190;Cluster-27241.62676;…	K01230+K01230+K01230+K01456+K01456+K03283+K03283+K03283+K03283+K03283+K03283+K03283+K03283+K03283+K03283+K03283+K03283+K03283+K03283+K03283+K03283+K03283+K03283+K03283+K03283+K03283+K03283+K03283+K04079+K04079+K04374+K04523+K05546+K08852+K08852+K08852+K08852+K08852+K09518+K09523+K10666+K13993+K13993+K13993+K13993+K13993+K13993+K13993+K13993+K13993+K13993+K13993+K13993+K13993+K13993+K13993+K13993+…
Indole alkaloid biosynthesis	ko00901	6 out of 1773 0.338409475465313%	33 out of 27406 0.120411588703204%	0.0178224	1	Cluster-27241.60463;Cluster-27241.77758;Cluster-27241.49364;Cluster-27241.49366;Cluster-27241.83066;Cluster-27241.85221	K01593+K01593+K01757+K01757+K01757+K01757
Phenylpropanoid biosynthesis	ko00940	72 out of 1773 4.06091370558376%	871 out of 27406 3.17813617456032%	0.019594	1	Cluster-27241.59624;Cluster-27241.74438;Cluster-27241.106060;Cluster-27241.106061;Cluster-27241.106062;Cluster-27241.106969;Cluster-27241.117244;Cluster-27241.128533;Cluster-27241.24378;Cluster-27241.35800;Cluster-27241.43277;Cluster-27241.52933;Cluster-27241.55499;Cluster-27241.62763;Cluster-27241.65518;Cluster-27241.68242;Cluster-27241.68351;Cluster-27241.68352;Cluster-27241.71675;Cluster-27241…	K00083+K00083+K00430+K00430+K00430+K00430+K00430+K00430+K00430+K00430+K00430+K00430+K00430+K00430+K00430+K00430+K00430+K00430+K00430+K00430+K00430+K00430+K00430+K00588+K01188+K01188+K01188+K01188+K01188+K01188+K01188+K01188+K01188+K01904+K01904+K01904+K03782+K05349+K05350+K09753+K09753+K09753+K09753+K09753+K09753+K09755+K10775+K10775+K10775+K10775+K13065+K13065+K13065+K13065+K13065+K13065+K13065+…
Flavone and flavonol biosynthesis	ko00944	14 out of 1773 0.789622109419064%	118 out of 27406 0.430562650514486%	0.0202886	1	Cluster-27241.101996;Cluster-27241.34875;Cluster-27241.70909;Cluster-27241.66182;Cluster-27241.66183;Cluster-27241.66185;Cluster-27241.66190;Cluster-27241.66191;Cluster-27241.74739;Cluster-27241.92665;Cluster-27241.52971;Cluster-27241.67856;Cluster-27241.73900;Cluster-27241.73902	K05280+K05280+K05280+K13083+K13083+K13083+K13083+K13083+K13083+K13083+K22771+K22772+K22772+K22772
Brassinosteroid biosynthesis	ko00905	13 out of 1773 0.733220530174845%	108 out of 27406 0.394074290301394%	0.0222094	1	Cluster-27241.41609;Cluster-27241.61684;Cluster-27241.60279;Cluster-27241.60280;Cluster-27241.59638;Cluster-27241.51233;Cluster-27241.56604;Cluster-27241.56608;Cluster-27241.68313;Cluster-27241.71731;Cluster-27241.75336;Cluster-27241.75340;Cluster-27241.75342	K09587+K09587+K09591+K09591+K15639+K20623+K20623+K20623+K20623+K20623+K20623+K20623+K20623
