# Supplementary material for: Physiological and Transcriptomic Analysis Revealed the Molecular Mechanism of Pinus koraiensis Responses to Light
Source: Int J Mol Sci. 2022 Nov 6;23(21):13608. doi: 10.3390/ijms232113608 (PMC9653891; doi:10.3390/ijms232113608)
Supplement: Supplementary file 1 [file ijms-23-13608-s001.zip › Table S7 The top 20 KEGG enrichment pathways of DEGs in L4 vs. In4.xlsx]

## Sheet: Sheet1
Supplemental Table S7. The top 20 KEGG enrichment pathways of DEGs in L4 vs. In4
#Kegg_pathway	ko_id	Cluter_frequency	Genome_frequency	P-value	Corrected_P-value	GeneID	KEGG Orthology
Flavonoid biosynthesis	ko00941	122 out of 2229 5.47330641543293%	441 out of 27406 1.60913668539736%	0	0	Cluster-27241.61396;Cluster-27241.62431;Cluster-27241.63895;Cluster-27241.64330;Cluster-27241.64660;Cluster-27241.75670;Cluster-27241.80805;Cluster-27241.64830;Cluster-27241.95635;Cluster-27241.46657;Cluster-27241.48518;Cluster-27241.50293;Cluster-27241.59323;Cluster-27241.59995;Cluster-27241.62520;Cluster-27241.64631;Cluster-27241.67714;Cluster-27241.67715;Cluster-27241.67716;Cluster-27241.67717…	K00475+K00475+K00475+K00475+K00475+K00475+K00475+K00588+K00660+K00660+K00660+K00660+K00660+K00660+K00660+K00660+K00660+K00660+K00660+K00660+K00660+K00660+K00660+K00660+K00660+K00660+K00660+K00660+K00660+K00660+K00660+K00660+K00660+K00660+K00660+K00660+K00660+K00660+K00660+K00660+K00660+K00660+K00660+K00660+K01859+K01859+K05277+K05277+K05277+K05277+K05277+K05277+K05277+K05277+K05278+K05278+K05278+…
Flavone and flavonol biosynthesis	ko00944	38 out of 2229 1.70480035890534%	118 out of 27406 0.430562650514486%	0	0	Cluster-27241.101996;Cluster-27241.25913;Cluster-27241.67336;Cluster-27241.67338;Cluster-27241.69610;Cluster-27241.69730;Cluster-27241.69736;Cluster-27241.70909;Cluster-27241.70910;Cluster-27241.76412;Cluster-27241.44923;Cluster-27241.66182;Cluster-27241.66183;Cluster-27241.66185;Cluster-27241.66186;Cluster-27241.66187;Cluster-27241.66190;Cluster-27241.66191;Cluster-27241.74738;Cluster-27241.7473…	K05280+K05280+K05280+K05280+K05280+K05280+K05280+K05280+K05280+K05280+K13083+K13083+K13083+K13083+K13083+K13083+K13083+K13083+K13083+K13083+K13083+K13083+K13083+K22771+K22772+K22772+K22772+K22772+K22772+K22772+K22772+K22772+K22772+K22772+K22772+K22772+K22772+K22794
Metabolic pathways	ko01100	1136 out of 2229 50.9645580978017%	11845 out of 27406 43.2204626724075%	1.0571e-14	1.41651e-12	Cluster-27241.105563;Cluster-27241.60178;Cluster-27241.84936;Cluster-27241.114268;Cluster-27241.68401;Cluster-27241.34771;Cluster-27241.94467;Cluster-27241.111667;Cluster-27241.60468;Cluster-27241.82121;Cluster-27241.49108;Cluster-27241.51527;Cluster-27241.59993;Cluster-27241.66563;Cluster-27241.66734;Cluster-27241.66736;Cluster-27241.66737;Cluster-27241.48634;Cluster-27241.65139;Cluster-27241.69…	K00001+K00001+K00001+K00002+K00002+K00016+K00020+K00020+K00020+K00020+K00021+K00021+K00021+K00021+K00021+K00021+K00021+K00028+K00029+K00029+K00029+K00029+K00031+K00059+K00059+K00059+K00059+K00059+K00059+K00074+K00074+K00074+K00074+K00078+K00083+K00083+K00083+K00083+K00083+K00083+K00088+K00108+K00108+K00108+K00108+K00108+K00108+K00108+K00108+K00108+K00108+K00108+K00108+K00121+K00121+K00122+K00128+…
Biosynthesis of secondary metabolites	ko01110	825 out of 2229 37.0121130551817%	7159 out of 27406 26.1220170765526%	1.90674e-11	2.55503e-09	Cluster-27241.105563;Cluster-27241.60178;Cluster-27241.84936;Cluster-27241.114268;Cluster-27241.68401;Cluster-27241.34771;Cluster-27241.49108;Cluster-27241.51527;Cluster-27241.59993;Cluster-27241.66563;Cluster-27241.66734;Cluster-27241.66736;Cluster-27241.66737;Cluster-27241.80829;Cluster-27241.2617;Cluster-27241.4949;Cluster-27241.54337;Cluster-27241.54580;Cluster-27241.58302;Cluster-27241.80039…	K00001+K00001+K00001+K00002+K00002+K00016+K00021+K00021+K00021+K00021+K00021+K00021+K00021+K00031+K00059+K00059+K00059+K00059+K00059+K00059+K00083+K00083+K00083+K00083+K00083+K00083+K00088+K00121+K00121+K00128+K00128+K00128+K00128+K00128+K00128+K00128+K00134+K00134+K00134+K00134+K00161+K00162+K00162+K00228+K00228+K00232+K00307+K00318+K00318+K00422+K00422+K00422+K00430+K00430+K00430+K00430+K00430+…
Fatty acid elongation	ko00062	29 out of 2229 1.30103185284881%	92 out of 27406 0.335692913960447%	9.25078e-11	1.2396e-08	Cluster-27241.101058;Cluster-27241.84829;Cluster-27241.84830;Cluster-27241.96799;Cluster-27241.97264;Cluster-27241.97265;Cluster-27241.111290;Cluster-27241.128914;Cluster-27241.21039;Cluster-27241.21864;Cluster-27241.25906;Cluster-27241.29945;Cluster-27241.32719;Cluster-27241.33239;Cluster-27241.33240;Cluster-27241.36967;Cluster-27241.37766;Cluster-27241.37767;Cluster-27241.40088;Cluster-27241.43…	K01068+K07512+K07512+K15397+K15397+K15397+K15397+K15397+K15397+K15397+K15397+K15397+K15397+K15397+K15397+K15397+K15397+K15397+K15397+K15397+K15397+K15397+K15397+K15397+K15397+K15397+K15397+K15397+K15397
Circadian rhythm - plant	ko04712	45 out of 2229 2.01884253028264%	196 out of 27406 0.715171860176604%	1.41987e-10	1.90262e-08	Cluster-27241.95635;Cluster-27241.46657;Cluster-27241.48518;Cluster-27241.50293;Cluster-27241.59323;Cluster-27241.59995;Cluster-27241.62520;Cluster-27241.64631;Cluster-27241.67714;Cluster-27241.67715;Cluster-27241.67716;Cluster-27241.67717;Cluster-27241.68060;Cluster-27241.68464;Cluster-27241.68655;Cluster-27241.68657;Cluster-27241.70122;Cluster-27241.70123;Cluster-27241.71072;Cluster-27241.71073…	K00660+K00660+K00660+K00660+K00660+K00660+K00660+K00660+K00660+K00660+K00660+K00660+K00660+K00660+K00660+K00660+K00660+K00660+K00660+K00660+K00660+K00660+K00660+K00660+K00660+K00660+K00660+K00660+K00660+K00660+K00660+K00660+K00660+K00660+K00660+K00660+K03097+K03115+K12118+K12121+K12121+K12121+K12133+K12133+K12133
Phenylpropanoid biosynthesis	ko00940	123 out of 2229 5.51816958277254%	871 out of 27406 3.17813617456032%	1.09158e-09	1.46272e-07	Cluster-27241.59624;Cluster-27241.64841;Cluster-27241.74437;Cluster-27241.74440;Cluster-27241.74441;Cluster-27241.91295;Cluster-27241.106060;Cluster-27241.106969;Cluster-27241.106971;Cluster-27241.106973;Cluster-27241.114739;Cluster-27241.128533;Cluster-27241.1842;Cluster-27241.23373;Cluster-27241.24378;Cluster-27241.27059;Cluster-27241.27060;Cluster-27241.35800;Cluster-27241.36994;Cluster-27241.…	K00083+K00083+K00083+K00083+K00083+K00083+K00430+K00430+K00430+K00430+K00430+K00430+K00430+K00430+K00430+K00430+K00430+K00430+K00430+K00430+K00430+K00430+K00430+K00430+K00430+K00430+K00430+K00430+K00430+K00430+K00430+K00430+K00430+K00430+K00430+K00588+K01188+K01188+K01188+K01188+K01188+K01188+K01188+K01188+K01188+K01188+K01188+K01188+K01188+K01188+K01188+K01188+K01188+K01904+K01904+K01904+K05349+…
Linoleic acid metabolism	ko00591	27 out of 2229 1.21130551816958%	112 out of 27406 0.408669634386631%	2.26282e-07	3.03218e-05	Cluster-27241.50939;Cluster-27241.69302;Cluster-27241.82053;Cluster-27241.59314;Cluster-27241.17076;Cluster-27241.27577;Cluster-27241.3019;Cluster-27241.46046;Cluster-27241.54476;Cluster-27241.56344;Cluster-27241.56345;Cluster-27241.59935;Cluster-27241.61049;Cluster-27241.62717;Cluster-27241.66015;Cluster-27241.66016;Cluster-27241.66733;Cluster-27241.70036;Cluster-27241.72480;Cluster-27241.72481;…	K00454+K00454+K00454+K14674+K15718+K15718+K15718+K15718+K15718+K15718+K15718+K15718+K15718+K15718+K15718+K15718+K15718+K15718+K15718+K15718+K15718+K15718+K15718+K15718+K15718+K15718+K15718
Cutin, suberine and wax biosynthesis	ko00073	53 out of 2229 2.37774786899955%	321 out of 27406 1.17127636284025%	5.9948e-07	8.03304e-05	Cluster-27241.105343;Cluster-27241.29298;Cluster-27241.37752;Cluster-27241.37755;Cluster-27241.95229;Cluster-27241.105784;Cluster-27241.32586;Cluster-27241.63699;Cluster-27241.71152;Cluster-27241.80119;Cluster-27241.80120;Cluster-27241.55840;Cluster-27241.108375;Cluster-27241.109924;Cluster-27241.110704;Cluster-27241.19490;Cluster-27241.25466;Cluster-27241.29868;Cluster-27241.29869;Cluster-27241.…	K13356+K13356+K13356+K13356+K15400+K15400+K15400+K15400+K15400+K15400+K15400+K15401+K15402+K15402+K15402+K15402+K15402+K15402+K15402+K15402+K15402+K15402+K15402+K15402+K15402+K15402+K15402+K15402+K15403+K15404+K15404+K15404+K15404+K15406+K15406+K15406+K15406+K15406+K15406+K15406+K15406+K15406+K15406+K15406+K15406+K17991+K17991+K17991+K20495+K20495+K20769+K21995+K21995
alpha-Linolenic acid metabolism	ko00592	55 out of 2229 2.46747420367878%	361 out of 27406 1.31722980369262%	4.73892e-06	0.000635015	Cluster-27241.103879;Cluster-27241.50939;Cluster-27241.69302;Cluster-27241.82053;Cluster-27241.108004;Cluster-27241.70358;Cluster-27241.70359;Cluster-27241.72280;Cluster-27241.22504;Cluster-27241.57631;Cluster-27241.68150;Cluster-27241.68151;Cluster-27241.68590;Cluster-27241.68591;Cluster-27241.68592;Cluster-27241.68593;Cluster-27241.68594;Cluster-27241.73326;Cluster-27241.73329;Cluster-27241.474…	K00232+K00454+K00454+K00454+K01723+K01723+K01723+K01723+K05894+K05894+K05894+K05894+K05894+K05894+K05894+K05894+K05894+K05894+K05894+K07513+K07513+K07513+K07513+K07513+K10526+K10526+K10526+K10527+K10529+K14674+K16818+K16818+K16818+K16818+K16818+K16818+K16818+K16818+K18857+K18857+K18857+K18857+K18857+K18857+K18857+K18857+K18857+K18857+K18857+K18857+K18857+K18857+K18857+K18857+K18857
Terpenoid backbone biosynthesis	ko00900	31 out of 2229 1.39075818752804%	200 out of 27406 0.72976720426184%	0.000383607	0.0514033	Cluster-27241.49108;Cluster-27241.51527;Cluster-27241.59993;Cluster-27241.66563;Cluster-27241.66734;Cluster-27241.66736;Cluster-27241.66737;Cluster-27241.85051;Cluster-27241.62093;Cluster-27241.61346;Cluster-27241.69386;Cluster-27241.25669;Cluster-27241.51188;Cluster-27241.60699;Cluster-27241.64762;Cluster-27241.65467;Cluster-27241.72532;Cluster-27241.72975;Cluster-27241.75284;Cluster-27241.75523…	K00021+K00021+K00021+K00021+K00021+K00021+K00021+K00626+K01641+K01662+K03527+K12742+K12742+K12742+K12742+K12742+K12742+K12742+K12742+K12742+K12742+K12742+K12742+K12742+K12742+K12742+K12742+K12742+K12742+K13789+K13789
Carotenoid biosynthesis	ko00906	31 out of 2229 1.39075818752804%	203 out of 27406 0.740713712325768%	0.000498146	0.0667516	Cluster-27241.73426;Cluster-27241.58198;Cluster-27241.76750;Cluster-27241.76753;Cluster-27241.79533;Cluster-27241.79534;Cluster-27241.79535;Cluster-27241.79536;Cluster-27241.79537;Cluster-27241.79541;Cluster-27241.79542;Cluster-27241.79543;Cluster-27241.79545;Cluster-27241.80670;Cluster-27241.68271;Cluster-27241.53291;Cluster-27241.54233;Cluster-27241.62798;Cluster-27241.65159;Cluster-27241.66114…	K02291+K09838+K09838+K09838+K09838+K09838+K09838+K09838+K09838+K09838+K09838+K09838+K09838+K09838+K09840+K09841+K09841+K09841+K09841+K09841+K09841+K09841+K09841+K09841+K09841+K09843+K09843+K09843+K14595+K14595+K14595
Protein processing in endoplasmic reticulum	ko04141	137 out of 2229 6.14625392552714%	1305 out of 27406 4.76173100780851%	0.00115613	0.154921	Cluster-27241.55787;Cluster-27241.60292;Cluster-27241.60293;Cluster-27241.60294;Cluster-27241.60295;Cluster-27241.60302;Cluster-27241.78301;Cluster-27241.78307;Cluster-27241.78309;Cluster-27241.117006;Cluster-27241.117007;Cluster-27241.17479;Cluster-27241.26227;Cluster-27241.26305;Cluster-27241.40979;Cluster-27241.56391;Cluster-27241.59190;Cluster-27241.61531;Cluster-27241.62676;Cluster-27241.714…	K01456+K01456+K01456+K01456+K01456+K01456+K01456+K01456+K01456+K03283+K03283+K03283+K03283+K03283+K03283+K03283+K03283+K03283+K03283+K03283+K03283+K03283+K03283+K03347+K03347+K04079+K04079+K04079+K04079+K04079+K04079+K04079+K04079+K04374+K08852+K08852+K08852+K08852+K08852+K08852+K08852+K09487+K09487+K09487+K09518+K09518+K10088+K10950+K13993+K13993+K13993+K13993+K13993+K13993+K13993+K13993+K13993+…
Glycosphingolipid biosynthesis - ganglio series	ko00604	16 out of 2229 0.717810677433827%	85 out of 27406 0.310151061811282%	0.00124438	0.166747	Cluster-27241.94588;Cluster-31267.0;Cluster-27241.56273;Cluster-27241.58192;Cluster-27241.60455;Cluster-27241.61440;Cluster-27241.61443;Cluster-27241.64016;Cluster-27241.66460;Cluster-27241.69822;Cluster-27241.69830;Cluster-27241.77479;Cluster-27241.80760;Cluster-27241.80761;Cluster-27241.86742;Cluster-27241.96781	K12309+K12309+K12309+K12309+K12309+K12309+K12309+K12309+K12309+K12309+K12309+K12309+K12309+K12309+K12309+K12373
Thiamine metabolism	ko00730	17 out of 2229 0.762673844773441%	94 out of 27406 0.342990586003065%	0.00141245	0.189268	Cluster-27241.93832;Cluster-27241.93837;Cluster-27241.93181;Cluster-27241.93183;Cluster-27241.93185;Cluster-27241.93186;Cluster-27241.49955;Cluster-27241.52329;Cluster-27241.61346;Cluster-27241.51903;Cluster-27241.46743;Cluster-27241.46745;Cluster-27241.46746;Cluster-27241.46747;Cluster-27241.71664;Cluster-27241.129062;Cluster-27241.5871	K00878+K00878+K00939+K00939+K00939+K00939+K00949+K00949+K01662+K03147+K14153+K14153+K14153+K14153+K14153+K22911+K22911
Diterpenoid biosynthesis	ko00904	21 out of 2229 0.942126514131898%	128 out of 27406 0.467051010727578%	0.00152981	0.204994	Cluster-27241.29257;Cluster-27241.69447;Cluster-27241.72977;Cluster-27241.81969;Cluster-27241.70189;Cluster-27241.54049;Cluster-27241.109126;Cluster-27241.42436;Cluster-27241.82849;Cluster-27241.26369;Cluster-27241.45353;Cluster-27241.56326;Cluster-27241.57592;Cluster-27241.58614;Cluster-27241.58616;Cluster-27241.59144;Cluster-27241.65464;Cluster-27241.80992;Cluster-27241.81524;Cluster-27241.8153…	K04120+K04120+K04120+K04120+K04122+K04124+K04125+K04125+K13070+K16086+K16086+K16086+K16086+K16086+K16086+K16086+K16086+K16086+K16086+K16086+K16086
Galactose metabolism	ko00052	62 out of 2229 2.78151637505608%	522 out of 27406 1.9046924031234%	0.00172124	0.230646	Cluster-27241.54262;Cluster-27241.34758;Cluster-27241.52990;Cluster-27241.53787;Cluster-27241.54749;Cluster-27241.54750;Cluster-27241.54752;Cluster-27241.56315;Cluster-27241.59732;Cluster-27241.69544;Cluster-27241.3674;Cluster-27241.110070;Cluster-27241.34503;Cluster-27241.40911;Cluster-27241.41186;Cluster-27241.52661;Cluster-27241.56814;Cluster-27241.58091;Cluster-27241.60075;Cluster-27241.63653…	K00844+K00850+K00850+K00850+K00850+K00850+K00850+K00850+K00850+K00850+K01187+K01193+K01193+K01193+K01193+K01193+K01193+K01193+K01193+K01193+K01193+K01193+K01193+K01193+K01193+K01193+K01785+K01785+K01785+K01785+K01785+K06617+K06617+K06617+K06617+K07407+K07407+K12309+K12309+K12309+K12309+K12309+K12309+K12309+K12309+K12309+K12309+K12309+K12309+K12309+K12309+K12309+K18819+K18819+K18819+K18819+K18819+…
Plant hormone signal transduction	ko04075	105 out of 2229 4.71063257065949%	993 out of 27406 3.62329416916004%	0.00332275	0.445248	Cluster-27241.105561;Cluster-27241.110199;Cluster-27241.26077;Cluster-27241.31820;Cluster-27241.33257;Cluster-27241.33258;Cluster-27241.33854;Cluster-27241.36308;Cluster-27241.37697;Cluster-27241.52944;Cluster-27241.63024;Cluster-27241.68063;Cluster-27241.72240;Cluster-27241.72990;Cluster-27241.90198;Cluster-27241.95445;Cluster-27241.100887;Cluster-27241.16988;Cluster-27241.2422;Cluster-27241.526…	K13415+K13415+K13415+K13415+K13415+K13415+K13415+K13415+K13415+K13415+K13415+K13415+K13415+K13415+K13415+K13416+K13416+K13416+K13416+K13416+K13416+K13416+K13416+K13416+K13416+K13416+K13416+K13416+K13416+K13416+K13416+K13422+K13422+K13422+K13449+K13449+K13449+K13449+K13449+K13449+K13449+K13464+K13464+K13464+K13464+K13464+K13464+K13464+K13464+K13464+K13464+K13464+K13464+K13464+K13464+K13464+K13464+…
Cyanoamino acid metabolism	ko00460	42 out of 2229 1.8842530282638%	341 out of 27406 1.24425308326644%	0.00467138	0.625964	Cluster-27241.66196;Cluster-27241.95430;Cluster-27241.95433;Cluster-27241.101751;Cluster-27241.101752;Cluster-27241.107488;Cluster-27241.110733;Cluster-27241.111963;Cluster-27241.121998;Cluster-27241.13696;Cluster-27241.45517;Cluster-27241.58008;Cluster-27241.60778;Cluster-27241.60779;Cluster-27241.60783;Cluster-27241.60784;Cluster-27241.60789;Cluster-27241.72660;Cluster-27241.59714;Cluster-27241…	K00600+K01188+K01188+K01188+K01188+K01188+K01188+K01188+K01188+K01188+K01188+K01188+K01188+K01188+K01188+K01188+K01188+K01188+K05349+K05349+K05349+K05349+K05349+K05349+K05349+K05349+K05349+K05349+K05349+K05350+K08248+K08248+K08248+K13034+K13051+K16266+K22706+K22706+K22706+K22706+K22706+K22706
Glycolysis / Gluconeogenesis	ko00010	95 out of 2229 4.26200089726335%	899 out of 27406 3.28030358315697%	0.00513464	0.688041	Cluster-27241.105563;Cluster-27241.60178;Cluster-27241.84936;Cluster-27241.114268;Cluster-27241.68401;Cluster-27241.34771;Cluster-27241.25708;Cluster-27241.59551;Cluster-27241.98153;Cluster-27241.54162;Cluster-27241.59444;Cluster-27241.68145;Cluster-27241.71561;Cluster-27241.71564;Cluster-27241.71573;Cluster-27241.15562;Cluster-27241.67865;Cluster-27241.67866;Cluster-27241.67867;Cluster-27241.719…	K00001+K00001+K00001+K00002+K00002+K00016+K00121+K00121+K00128+K00128+K00128+K00128+K00128+K00128+K00128+K00134+K00134+K00134+K00134+K00161+K00162+K00162+K00844+K00850+K00850+K00850+K00850+K00850+K00850+K00850+K00850+K00850+K00873+K00873+K00873+K00927+K00927+K00927+K00927+K00927+K00927+K00927+K00927+K00927+K00927+K00927+K00927+K00927+K00927+K01568+K01568+K01568+K01568+K01568+K01568+K01568+K01610+…
