# Supplementary material for: Physiological and Transcriptomic Analysis Revealed the Molecular Mechanism of Pinus koraiensis Responses to Light
Source: Int J Mol Sci. 2022 Nov 6;23(21):13608. doi: 10.3390/ijms232113608 (PMC9653891; doi:10.3390/ijms232113608)
Supplement: Supplementary file 1 [file ijms-23-13608-s001.zip › Table S8 Statistics of the numbers of transcription factor.xlsx]

## Sheet: Sheet1
Supplemental Table S8. Statistics of the numbers of transcription factor
Transcription factors	Number
MYB-related	53
AP2/ERF	50
MYB	28
Tify	24
NAC	22
WRKY	22
bHLH	20
HB	20
C2H2	16
bZIP	13
LOB	13
GARP	12
MADS	9
B3	7
C2C2	7
C3H	7
SBP	7
NF	5
PLATZ	5
EIL	4
HSF	4
GRAS	3
OFP	3
BBR	1
GRF	1
RWP-RK	1
Trihelix	1
ULT	1
VOZ	1
zf-HD	1
