# Supplementary material for: Physiological and Transcriptomic Analysis Revealed the Molecular Mechanism of Pinus koraiensis Responses to Light
Source: Int J Mol Sci. 2022 Nov 6;23(21):13608. doi: 10.3390/ijms232113608 (PMC9653891; doi:10.3390/ijms232113608)
Supplement: Supplementary file 1 [file ijms-23-13608-s001.zip › Table S9 Statistics of differentially expressed genes encoding transcription factors.xlsx]

## Sheet: Sheet1
Supplemental Table S9. Statistics of differentially expressed genes encoding transcription factors
Family	Category	Classification	ID	TCK-1_fpkm	TCK-2_fpkm	TCK-3_fpkm	TIn4-1_fpkm	TIn4-2_fpkm	TIn4-3_fpkm	TL4-1_fpkm	TL4-2_fpkm	TL4-3_fpkm	TCK-1_count	TCK-2_count	TCK-3_count	TIn4-1_count	TIn4-2_count	TIn4-3_count	TL4-1_count	TL4-2_count	TL4-3_count	TCK_vs_TIn4_log2FoldChange	TCK_vs_TIn4_pvalue	TCK_vs_TIn4_padj	TCK_vs_TIn4_regulated	TCK_vs_TL4TIn4_log2FoldChange	TCK_vs_TL4TIn4_pvalue	TCK_vs_TL4TIn4_padj	TCK_vs_TL4TIn4_regulated	TL4_vs_TIn4_log2FoldChange	TL4_vs_TIn4_pvalue	TL4_vs_TIn4_padj	TL4_vs_TIn4_regulated	TCK_vs_TL4_log2FoldChange	TCK_vs_TL4_pvalue	TCK_vs_TL4_padj	TCK_vs_TL4_regulated	length	KEGG	Nr	Swissprot	TrEMBL	KOG	GO	Pfam	TF-Family	TF-Category	TF-Classification
MYB-related	TF	MYB->MYB-related	Cluster-27241.126567	19.19	20.59	20.03	1.29	1.2	1.37	9.57	6.56	6.45	175.8	111.42	104.5	10.62	7.37	10.93	58.85	52.86	61.97	-3.99903	2.84755e-34	1.10897e-32	down	-2.24009	0.00183229	0.0142765	down	-2.53112	2.09817e-08	2.32508e-07	down	-1.47227	1.44031e-08	1.69839e-07	down	NA	NA	NA	NA	NA	NA	NA	NA	NA	NA	NA
MYB-related	TF	MYB->MYB-related	Cluster-27241.128913	1.29	0.51	1.09	0.33	0.15	0.06	1.99	0.63	0.96	39.06	9.23	19.57	9.15	3.02	1.47	42.04	16.77	30.04	-2.58495	0.00161282	0.00513875	down	-0.588306	0.55338	0.731215	false	NA	NA	NA	NA	0.218578	0.745154	0.851083	false	NA	NA	NA	NA	NA	NA	NA	NA	NA	NA	NA
MYB-related	TF	MYB->MYB-related	Cluster-27241.128914	10.1	11.61	11.07	2.47	2.63	2.4	8.96	10.99	11.73	147.94	100.77	94.43	32.85	25.98	30.53	89.96	142.23	178.96	-2.18181	8.77848e-20	1.70546e-18	down	-0.801996	0.1962	0.391229	false	-2.08126	1.398e-12	2.70682e-11	down	-0.0977625	0.672092	0.800496	false	NA	NA	NA	NA	NA	NA	NA	NA	NA	NA	NA
MYB-related	TF	MYB->MYB-related	Cluster-27241.129229	0	0	0	3.85	1.97	1.96	0	0	0	0	0	0	67.31	25.68	32.65	0	0	0	7.50762	6.32811e-09	4.68653e-08	up	6.49116	0.0270158	0.104467	false	7.85941	6.32915e-09	7.58874e-08	up	NA	NA	NA	NA	NA	NA	NA	NA	NA	NA	NA	NA	NA	NA	NA
MYB-related	TF	MYB->MYB-related	Cluster-27241.26281	6.16	5.09	6.15	1.73	2.06	1.4	12.81	26.48	27.77	106	52	62	27	24	21	152	403	497	-1.82972	3.56313e-10	3.07817e-09	down	0.997607	0.29349	0.502107	false	-3.71257	1.11163e-18	3.87084e-17	down	1.89051	3.53362e-07	3.29307e-06	up	833	K09422 transcription factor MYB, plant | (RefSeq) transcription factor CPC-like (A)	transcription factor CPC-like [Hevea brasiliensis]	CPC_ARATH RecName: Full=Transcription factor CPC; AltName: Full=Protein CAPRICE;	A0A1Q3AME2_CEPFO SubName: Full=Myb_DNA-binding domain-containing protein {ECO:0000313|EMBL:GAV56919.1};	--	GO:0005634,nucleus; GO:0003700,DNA-binding transcription factor activity; GO:0000981,DNA-binding transcription factor activity, RNA polymerase II-specific; GO:0043565,sequence-specific DNA binding; GO:0001135,RNA polymerase II transcription regulator recruiting activity; GO:0044212,transcription regulatory region DNA binding; GO:0009913,epidermal cell differentiation; GO:0007275,multicellular org…	Myb-like DNA-binding domain	MYB-related	TF	MYB->MYB-related
MYB-related	TF	MYB->MYB-related	Cluster-27241.33412	0.74	0.65	0.75	1.3	1.51	1.81	0.41	0.69	0.93	23	12	14	37	32	49	9	19	30	1.03967	0.00803077	0.0214877	up	0.561627	0.283844	0.492203	false	1.1637	0.0176672	0.0600361	false	NA	NA	NA	NA	1302	K09422 transcription factor MYB, plant | (RefSeq) transcription repressor MYB6-like (A)	R2R3MYB3 [Ginkgo biloba]	MYB30_ANTMA RecName: Full=Myb-related protein 330;	A0A222UBG5_GINBI SubName: Full=R2R3MYB3 {ECO:0000313|EMBL:ASR18088.1};	Transcription factor, Myb superfamily	GO:0005634,nucleus; GO:0003677,DNA binding; GO:0006355,regulation of transcription, DNA-templated; GO:0006351,transcription, DNA-templated; GO:0003674,molecular_function; GO:0003676,nucleic acid binding; GO:0005488,binding; GO:0097159,organic cyclic compound binding; GO:1901363,heterocyclic compound binding; GO:0008152,metabolic process; GO:0006139,nucleobase-containing compound metabolic process…	Myb-like DNA-binding domain	MYB-related	TF	MYB->MYB-related
MYB-related	TF	MYB->MYB-related	Cluster-27241.37766	8.17	10.73	7.65	1.41	1.33	2	12.81	19.09	22.76	99.14	77.15	53.67	15.46	10.84	21.17	105.77	204.33	288.36	-2.54858	1.1712e-13	1.42436e-12	down	0.102507	0.912241	0.955881	false	-3.53871	1.56725e-17	4.89179e-16	down	0.989669	0.0030405	0.0126788	false	663	K15397 3-ketoacyl-CoA synthase [EC:2.3.1.199] | (RefSeq) 3-ketoacyl-CoA synthase 17-like (A)	unknown [Picea sitchensis]	RADL5_ARATH RecName: Full=Protein RADIALIS-like 5; Short=AtRL5; Short=Protein RAD-like 5; AltName: Full=Protein RADIALIS-LIKE SANT/MYB 4; Short=Protein RSM4;	D5ADC1_PICSI SubName: Full=Uncharacterized protein {ECO:0000313|EMBL:ADE77540.1};	Zuotin and related molecular chaperones (DnaJ superfamily), contains DNA-binding domains	GO:0005634,nucleus; GO:0003677,DNA binding; GO:0006355,regulation of transcription, DNA-templated; GO:0006351,transcription, DNA-templated; GO:0003674,molecular_function; GO:0003676,nucleic acid binding; GO:0005488,binding; GO:0097159,organic cyclic compound binding; GO:1901363,heterocyclic compound binding; GO:0008152,metabolic process; GO:0006139,nucleobase-containing compound metabolic process…	--	MYB-related	TF	MYB->MYB-related
MYB-related	TF	MYB->MYB-related	Cluster-27241.37767	40.03	33.53	33.45	9.45	7.35	7.87	16.46	33.27	32.3	613.86	304.85	299.33	131.54	76.16	104.83	173.23	450.67	515.64	-2.18036	2.0387e-52	1.29597e-50	down	-1.0624	0.0527424	0.163967	false	-1.74493	7.49702e-07	6.53929e-06	down	-0.436843	0.168768	0.321696	false	770	K15397 3-ketoacyl-CoA synthase [EC:2.3.1.199] | (RefSeq) 3-ketoacyl-CoA synthase 17-like (A)	unknown [Picea sitchensis]	RADL6_ARATH RecName: Full=Protein RADIALIS-like 6; Short=AtRL6; Short=Protein RAD-like 6; AltName: Full=Protein RADIALIS-LIKE SANT/MYB 3; Short=Protein RSM3;	D5ADC1_PICSI SubName: Full=Uncharacterized protein {ECO:0000313|EMBL:ADE77540.1};	Zuotin and related molecular chaperones (DnaJ superfamily), contains DNA-binding domains	GO:0005634,nucleus; GO:0003677,DNA binding; GO:0003700,DNA-binding transcription factor activity; GO:0006355,regulation of transcription, DNA-templated; GO:0006351,transcription, DNA-templated; GO:0003674,molecular_function; GO:0003676,nucleic acid binding; GO:0005488,binding; GO:0097159,organic cyclic compound binding; GO:1901363,heterocyclic compound binding; GO:0140110,transcription regulator …	--	MYB-related	TF	MYB->MYB-related
MYB-related	TF	MYB->MYB-related	Cluster-27241.39455	31	34.6	29.57	9.62	21.91	7.07	16.66	15.33	23.11	39	25	17	10	17	8	12	16	32	-1.38492	0.00959295	0.0250794	down	-1.05222	0.0290661	0.109926	false	NA	NA	NA	NA	-0.782195	0.120416	0.252196	false	272	K09422 transcription factor MYB, plant | (RefSeq) transcription repressor MYB6-like (A)	transcription factor MYB30 [Picea abies]	MYB5_ARATH RecName: Full=Transcription repressor MYB5; AltName: Full=AtM2; AltName: Full=Myb-related protein 5; Short=AtMYB5;	A0A167V901_PICAB SubName: Full=Transcription factor MYB30 {ECO:0000313|EMBL:ANB66413.1};	Transcription factor, Myb superfamily	GO:0005634,nucleus; GO:0003700,DNA-binding transcription factor activity; GO:0000981,DNA-binding transcription factor activity, RNA polymerase II-specific; GO:0043565,sequence-specific DNA binding; GO:0001135,RNA polymerase II transcription regulator recruiting activity; GO:0044212,transcription regulatory region DNA binding; GO:0048354,mucilage biosynthetic process involved in seed coat developm…	--	MYB-related	TF	MYB->MYB-related
MYB-related	TF	MYB->MYB-related	Cluster-27241.39457	45.1	50.58	52.73	18.66	18.17	12.93	24.75	39.11	27.88	94	61	54	33	24	24	31	69	63	-1.61038	8.25665e-09	6.02394e-08	down	-1.09113	0.00404701	0.0265157	down	-0.903925	0.026939	0.0849413	false	-0.704134	0.0371229	0.102481	false	310	K09422 transcription factor MYB, plant | (RefSeq) myb-related protein Hv1 (A)	transcription factor MYB30 [Picea abies]	MYB34_ARATH RecName: Full=Transcription factor MYB34; AltName: Full=Myb-related protein 34; Short=AtMYB34; AltName: Full=Protein ALTERED TRYPTOPHAN REGULATION 1; Short=ATR1;	A0A167V901_PICAB SubName: Full=Transcription factor MYB30 {ECO:0000313|EMBL:ANB66413.1};	Transcription factor, Myb superfamily	GO:0005634,nucleus; GO:0003700,DNA-binding transcription factor activity; GO:0000981,DNA-binding transcription factor activity, RNA polymerase II-specific; GO:0043565,sequence-specific DNA binding; GO:0001135,RNA polymerase II transcription regulator recruiting activity; GO:0044212,transcription regulatory region DNA binding; GO:0030154,cell differentiation; GO:0010438,cellular response to sulfur…	--	MYB-related	TF	MYB->MYB-related
MYB-related	TF	MYB->MYB-related	Cluster-27241.39460	12.89	13.42	14.95	5.4	4.79	5.68	6.44	10.58	9.81	354.8	219.39	243.88	135.62	89.62	135.54	123.41	258.09	279.6	-1.43305	3.00924e-23	7.17013e-22	down	-1.01503	0.000978881	0.00862481	down	-0.760443	0.00767429	0.0295783	false	-0.678382	0.0081455	0.0294308	false	1178	K09422 transcription factor MYB, plant | (RefSeq) transcription repressor MYB5-like (A)	MYB transcription factor MYB6 [Pinus radiata]	MYB82_ARATH RecName: Full=Transcription factor MYB82; AltName: Full=Myb-related protein 82; Short=AtMYB82;	A0A1W2KRF4_PINRA SubName: Full=MYB transcription factor MYB6 {ECO:0000313|EMBL:AQW79622.1};	Transcription factor, Myb superfamily	GO:0005634,nucleus; GO:0000981,DNA-binding transcription factor activity, RNA polymerase II-specific; GO:0043565,sequence-specific DNA binding; GO:0001135,RNA polymerase II transcription regulator recruiting activity; GO:0044212,transcription regulatory region DNA binding; GO:0007275,multicellular organism development; GO:0045893,positive regulation of transcription, DNA-templated; GO:0006357,reg…	Myb-like DNA-binding domain	MYB-related	TF	MYB->MYB-related
MYB-related	TF	MYB->MYB-related	Cluster-27241.45170	0.77	0.54	1.36	0.16	0.34	0.52	0.72	0	0.29	77.74	32.63	82.26	14.72	23.62	45.3	51.44	0	30.29	-1.45128	0.00314858	0.00934642	down	-1.48365	0.121352	0.286686	false	0.0552626	0.967359	0.986137	false	-1.49163	0.22867	0.397393	false	3626	K12133 MYB-related transcription factor LHY | (RefSeq) protein LHY isoform X1 (A)	unknown [Picea sitchensis]	LHY_ARATH RecName: Full=Protein LHY {ECO:0000303|PubMed:9657154}; AltName: Full=MYB-related transcription factor LHY {ECO:0000303|PubMed:9657154}; AltName: Full=Protein LATE ELONGATED HYPOCOTYL {ECO:0000303|PubMed:9657154};	A9NW27_PICSI SubName: Full=Uncharacterized protein {ECO:0000313|EMBL:ABK24838.1};	Zuotin and related molecular chaperones (DnaJ superfamily), contains DNA-binding domains	GO:0005634,nucleus; GO:0003700,DNA-binding transcription factor activity; GO:0044212,transcription regulatory region DNA binding; GO:0007623,circadian rhythm; GO:0048574,long-day photoperiodism, flowering; GO:0042754,negative regulation of circadian rhythm; GO:0043433,negative regulation of DNA-binding transcription factor activity; GO:0042752,regulation of circadian rhythm; GO:0006355,regulation…	Myb-like DNA-binding domain	MYB-related	TF	MYB->MYB-related
MYB-related	TF	MYB->MYB-related	Cluster-27241.45171	1.01	0.92	0.47	2.37	1.99	1.78	1.75	0.95	0.94	110.42	59.72	31.04	237.78	148.29	168.59	134.68	91.95	105.88	1.26669	8.4075e-07	4.67832e-06	up	0.942471	0.0158701	0.0718299	false	0.758084	0.0220575	0.0722315	false	0.530536	0.236653	0.407177	false	3912	K12133 MYB-related transcription factor LHY | (RefSeq) protein LHY isoform X1 (A)	unknown [Picea sitchensis]	LHY_ARATH RecName: Full=Protein LHY {ECO:0000303|PubMed:9657154}; AltName: Full=MYB-related transcription factor LHY {ECO:0000303|PubMed:9657154}; AltName: Full=Protein LATE ELONGATED HYPOCOTYL {ECO:0000303|PubMed:9657154};	A9NW27_PICSI SubName: Full=Uncharacterized protein {ECO:0000313|EMBL:ABK24838.1};	Zuotin and related molecular chaperones (DnaJ superfamily), contains DNA-binding domains	GO:0005634,nucleus; GO:0003700,DNA-binding transcription factor activity; GO:0044212,transcription regulatory region DNA binding; GO:0007623,circadian rhythm; GO:0048574,long-day photoperiodism, flowering; GO:0042754,negative regulation of circadian rhythm; GO:0043433,negative regulation of DNA-binding transcription factor activity; GO:0042752,regulation of circadian rhythm; GO:0006355,regulation…	Myb-like DNA-binding domain	MYB-related	TF	MYB->MYB-related
MYB-related	TF	MYB->MYB-related	Cluster-27241.51360	0.76	0.61	0.7	1.08	2.1	2.26	3.95	2.11	1.37	92.3	44.06	50.7	119.92	173.56	236.58	337.72	226.54	170.91	1.32171	1.50016e-05	6.95138e-05	up	1.56041	0.000142978	0.00181158	up	-0.443018	0.368853	0.587242	false	1.77814	7.79717e-05	0.000482439	up	4306	K12133 MYB-related transcription factor LHY | (RefSeq) protein LHY (A)	putative LHY [Cryptomeria japonica]	RVE1_ARATH RecName: Full=Protein REVEILLE 1;	A0A0C9S8A2_9SPER SubName: Full=TSA: Wollemia nobilis Ref_Wollemi_Transcript_11910_4056 transcribed RNA sequence {ECO:0000313|EMBL:JAG87628.1};	Zuotin and related molecular chaperones (DnaJ superfamily), contains DNA-binding domains	GO:0005634,nucleus; GO:0003677,DNA binding; GO:0003700,DNA-binding transcription factor activity; GO:0009851,auxin biosynthetic process; GO:0009734,auxin-activated signaling pathway; GO:0007623,circadian rhythm; GO:0010600,regulation of auxin biosynthetic process; GO:0006355,regulation of transcription, DNA-templated; GO:0006351,transcription, DNA-templated; GO:0003674,molecular_function; GO:0003…	--	MYB-related	TF	MYB->MYB-related
MYB-related	TF	MYB->MYB-related	Cluster-27241.62976	1.07	1.07	1.02	3.48	2.16	2.85	7.09	5.12	5.48	92.3	54.68	52.61	274.43	126.64	211.86	430.11	390.43	485.78	1.3506	4.16625e-10	3.57279e-09	up	1.96921	3.77721e-07	1.02339e-05	up	-1.05906	1.90828e-05	0.00013487	down	2.41213	6.30024e-26	3.54584e-24	up	3134	K12133 MYB-related transcription factor LHY | (RefSeq) protein LHY-like isoform X1 (A)	CCA1-like protein [Picea abies]	RVE1_ARATH RecName: Full=Protein REVEILLE 1;	M4Q9T9_PICAB SubName: Full=CCA1-like protein {ECO:0000313|EMBL:AGH20047.1};	Zuotin and related molecular chaperones (DnaJ superfamily), contains DNA-binding domains	GO:0005634,nucleus; GO:0003677,DNA binding; GO:0003700,DNA-binding transcription factor activity; GO:0009851,auxin biosynthetic process; GO:0009734,auxin-activated signaling pathway; GO:0007623,circadian rhythm; GO:0010600,regulation of auxin biosynthetic process; GO:0006355,regulation of transcription, DNA-templated; GO:0006351,transcription, DNA-templated; GO:0003674,molecular_function; GO:0003…	Myb-like DNA-binding domain	MYB-related	TF	MYB->MYB-related
MYB-related	TF	MYB->MYB-related	Cluster-27241.62977	0	0	0	0.35	0.77	0.5	2	0.43	0.59	0	0	0	25.92	42.93	35.22	114.82	30.86	49.66	7.32815	2.55223e-08	1.7369e-07	up	7.8439	1.17152e-08	4.47912e-07	up	-0.895111	0.208758	0.407467	false	8.23993	3.24526e-08	3.63394e-07	up	2980	K12133 MYB-related transcription factor LHY | (RefSeq) protein LHY-like isoform X1 (A)	CCA1-like protein [Picea abies]	RVE1_ARATH RecName: Full=Protein REVEILLE 1;	M4Q9T9_PICAB SubName: Full=CCA1-like protein {ECO:0000313|EMBL:AGH20047.1};	Zuotin and related molecular chaperones (DnaJ superfamily), contains DNA-binding domains	GO:0005634,nucleus; GO:0003677,DNA binding; GO:0003700,DNA-binding transcription factor activity; GO:0009851,auxin biosynthetic process; GO:0009734,auxin-activated signaling pathway; GO:0007623,circadian rhythm; GO:0010600,regulation of auxin biosynthetic process; GO:0006355,regulation of transcription, DNA-templated; GO:0006351,transcription, DNA-templated; GO:0003674,molecular_function; GO:0003…	Myb-like DNA-binding domain	MYB-related	TF	MYB->MYB-related
MYB-related	TF	MYB->MYB-related	Cluster-27241.63128	2.77	3.25	1.1	0.67	0.71	0	0.51	0	1.75	58.67	40.83	13.67	12.83	10.25	0	7.5	0	38.4	-2.48766	0.0024078	0.00736956	down	-2.0542	0.100709	0.253224	false	NA	NA	NA	NA	-1.72032	0.16607	0.317819	false	965	K09422 transcription factor MYB, plant | (RefSeq) myb-related protein 308 (A)	R2R3-MYB transcription factor MYB10 [Picea glauca]	MYB4_ARATH RecName: Full=Transcription repressor MYB4; AltName: Full=Myb-related protein 4; Short=AtMYB4;	A5JYF4_PICGL SubName: Full=R2R3-MYB transcription factor MYB10 {ECO:0000313|EMBL:ABQ51226.1};	Transcription factor, Myb superfamily	GO:0005634,nucleus; GO:0003677,DNA binding; GO:0003700,DNA-binding transcription factor activity; GO:0000981,DNA-binding transcription factor activity, RNA polymerase II-specific; GO:0043565,sequence-specific DNA binding; GO:0001135,RNA polymerase II transcription regulator recruiting activity; GO:0044212,transcription regulatory region DNA binding; GO:0030154,cell differentiation; GO:1903086,neg…	Myb-like DNA-binding domain	MYB-related	TF	MYB->MYB-related
MYB-related	TF	MYB->MYB-related	Cluster-27241.64517	1.39	0.65	2.19	3.33	2.14	3.43	0.51	1.87	1.17	29.33	8.17	27.33	64.17	30.75	63	7.5	35	25.6	1.03526	0.021133	0.0497	up	0.515818	0.424062	0.626178	false	1.28757	0.0237361	0.0767234	false	-0.260486	0.724614	0.837214	false	965	K09422 transcription factor MYB, plant | (RefSeq) myb-related protein 308 (A)	R2R3-MYB transcription factor MYB10 [Picea glauca]	MYB4_ARATH RecName: Full=Transcription repressor MYB4; AltName: Full=Myb-related protein 4; Short=AtMYB4;	A5JYF4_PICGL SubName: Full=R2R3-MYB transcription factor MYB10 {ECO:0000313|EMBL:ABQ51226.1};	Transcription factor, Myb superfamily	GO:0005634,nucleus; GO:0003677,DNA binding; GO:0003700,DNA-binding transcription factor activity; GO:0000981,DNA-binding transcription factor activity, RNA polymerase II-specific; GO:0043565,sequence-specific DNA binding; GO:0001135,RNA polymerase II transcription regulator recruiting activity; GO:0044212,transcription regulatory region DNA binding; GO:0030154,cell differentiation; GO:1903086,neg…	Myb-like DNA-binding domain	MYB-related	TF	MYB->MYB-related
MYB-related	TF	MYB->MYB-related	Cluster-27241.68481	5.64	6.5	5.67	1.9	2.34	3.48	1.82	3.26	2.36	77.26	52.71	45.11	23.56	21.65	41.39	17	39.37	33.67	-1.25334	0.00013654	0.000539189	down	-1.28603	3.43171e-05	0.000547447	down	0.0589345	0.906318	0.957079	false	-1.30752	0.000576284	0.0029582	down	NA	NA	NA	NA	NA	NA	NA	NA	NA	NA	NA
MYB-related	TF	MYB->MYB-related	Cluster-27241.68482	7	4.77	6.36	1.37	1.66	1.66	1.86	1.84	2.13	114.66	46.31	60.89	20.37	18.37	23.61	21	26.63	36.33	-2.03871	1.66964e-10	1.49817e-09	down	-1.8601	1.34539e-11	8.79734e-10	down	-0.334938	0.42697	0.640619	false	-1.69499	8.2683e-07	7.25958e-06	down	NA	NA	NA	NA	NA	NA	NA	NA	NA	NA	NA
MYB-related	TF	MYB->MYB-related	Cluster-27241.69695	46.07	44.41	41.94	17.37	14.74	14.37	136.5	154.99	162.92	1598	916	866	551	348	432	3312	4767	5848	-1.58094	2.03778e-95	2.64537e-93	down	0.85251	0.288579	0.496944	false	-3.2951	1.09132e-130	1.09877e-127	down	1.71513	5.68149e-53	8.93577e-51	up	NA	NA	NA	NA	NA	NA	NA	NA	NA	NA	NA
MYB-related	TF	MYB->MYB-related	Cluster-27241.70897	35.8	35.34	36.02	16.36	14.91	15.05	10.59	13.88	14.1	630.18	369.1	371.69	261.81	177.71	230.08	128.51	216.08	257.99	-1.27364	1.32365e-39	6.23753e-38	down	-1.40293	2.56856e-23	7.36918e-21	down	0.253464	0.210296	0.409494	false	-1.52675	4.37933e-18	1.42843e-16	down	NA	NA	NA	NA	NA	NA	NA	NA	NA	NA	NA
MYB-related	TF	MYB->MYB-related	Cluster-27241.76416	147.56	136.09	140.78	59.81	49.39	42.63	387.26	479.56	495.94	311	166	146	107	66	80	491	856	1133	-1.52235	9.49467e-19	1.72031e-17	down	0.811806	0.319906	0.529013	false	-3.18022	1.9601e-37	1.96227e-35	down	1.66084	3.29133e-13	6.70014e-12	up	NA	NA	NA	NA	NA	NA	NA	NA	NA	NA	NA
MYB-related	TF	MYB->MYB-related	Cluster-27241.80682	0.9	0.36	0.74	1.24	2.37	2.27	2.31	1.31	0.58	122.79	29.26	60.37	154.59	220.16	266.62	221.7	157.9	80.55	1.47793	2.05097e-05	9.30268e-05	up	1.2567	0.0108716	0.0549295	false	0.490528	0.370127	0.588605	false	1.00834	0.0937432	0.210091	false	NA	NA	NA	NA	NA	NA	NA	NA	NA	NA	NA
MYB-related	TF	MYB->MYB-related	Cluster-27241.100564	3.27	3.12	3.32	4.77	4.4	3.86	6.48	9	7.71	179.27	101.85	108.87	239.78	164.38	183.18	249.84	437.98	436.79	0.349205	0.0186379	0.0446504	false	0.82715	0.00813739	0.0447219	false	-0.844511	5.18406e-05	0.000339682	false	1.19473	1.03748e-08	1.24642e-07	up	2093	K09422 transcription factor MYB, plant | (RefSeq) telomere repeat-binding factor 4 (A)	unknown [Picea sitchensis]	SMH4_MAIZE RecName: Full=Single myb histone 4; AltName: Full=Protein SINGLE MYB HISTONE4;	A0A0D6QZP2_ARACU SubName: Full=Uncharacterized protein {ECO:0000313|EMBL:JAG97042.1};	--	GO:0000785,chromatin; GO:0000781,chromosome, telomeric region; GO:0005730,nucleolus; GO:0000786,nucleosome; GO:0005634,nucleus; GO:0003691,double-stranded telomeric DNA binding; GO:0042803,protein homodimerization activity; GO:0043047,single-stranded telomeric DNA binding; GO:0006334,nucleosome assembly; GO:0006355,regulation of transcription, DNA-templated; GO:0006351,transcription, DNA-template…	Myb-like DNA-binding domain	MYB-related	TF	MYB->MYB-related
MYB-related	TF	MYB->MYB-related	Cluster-27241.11517	0.18	0	0	0.05	0.07	0.15	8.65	18.19	17.07	4	0	0	1	1	3	134.5	360.82	396.94	NA	NA	NA	NA	6.78387	0.000300441	0.00336541	up	-7.3434	4.20352e-21	1.76553e-19	down	7.5067	1.85359e-17	5.76741e-16	up	NA	NA	NA	NA	NA	NA	NA	NA	NA	NA	NA
MYB-related	TF	MYB->MYB-related	Cluster-27241.120588	0	0	0	0	0	0	24.95	24.21	29.01	0	0	0	0	0	0	305.98	380.7	536.26	NA	NA	NA	NA	23.048	1.93655e-11	1.22726e-09	up	-11.0012	4.19973e-20	1.63529e-18	down	10.73	3.47731e-19	1.2297e-17	up	NA	NA	NA	NA	NA	NA	NA	NA	NA	NA	NA
MYB-related	TF	MYB->MYB-related	Cluster-27241.120589	0	0	0	0	0	0	7.18	2.99	4.8	0	0	0	0	0	0	43.1	23.56	45.06	NA	NA	NA	NA	6.32929	0.0309201	0.114408	false	-7.59965	3.08026e-08	3.31032e-07	down	7.33254	1.25414e-07	1.26679e-06	up	NA	NA	NA	NA	NA	NA	NA	NA	NA	NA	NA
MYB-related	TF	MYB->MYB-related	Cluster-27241.120591	0	0	0.49	0	0	0	110.02	179.51	179.96	0	0	1	0	0	0	268.15	596.29	738.14	NA	NA	NA	NA	9.01376	0.00854619	0.0462419	up	-11.3578	3.75893e-20	1.46853e-18	down	10.1218	1.5018e-16	4.28211e-15	up	NA	NA	NA	NA	NA	NA	NA	NA	NA	NA	NA
MYB-related	TF	MYB->MYB-related	Cluster-27241.120592	0	0	0	0	0	0	1.53	2.53	1.77	0	0	0	0	0	0	19.59	41.43	34.09	NA	NA	NA	NA	6.04775	0.0395003	0.134949	false	-7.32176	7.86035e-08	7.91855e-07	down	7.04916	3.04618e-07	2.86752e-06	up	NA	NA	NA	NA	NA	NA	NA	NA	NA	NA	NA
MYB-related	TF	MYB->MYB-related	Cluster-27241.120989	0	0	0	0	0	0	42.33	55.15	52.88	0	0	0	0	0	0	254.04	434.02	496.41	NA	NA	NA	NA	22.9961	2.14785e-11	1.3405e-09	up	-10.9477	1.33089e-19	5.01597e-18	down	10.6754	9.86012e-19	3.38269e-17	up	NA	NA	NA	NA	NA	NA	NA	NA	NA	NA	NA
MYB-related	TF	MYB->MYB-related	Cluster-27241.121892	0	0	0	0	0	0	6.35	6.71	6.77	0	0	0	0	0	0	110	148	175	NA	NA	NA	NA	8.23857	0.00417782	0.0271787	up	-9.51244	4.5687e-15	1.14998e-13	down	9.24121	3.03553e-14	6.85612e-13	up	NA	NA	NA	NA	NA	NA	NA	NA	NA	NA	NA
MYB-related	TF	MYB->MYB-related	Cluster-27241.12662	0	0	0.07	0	0	0	4.24	4.41	4.97	0	0	0.29	0	0	0	21.29	29.27	39.49	NA	NA	NA	NA	5.94243	0.0429929	0.142629	false	-7.21732	7.68558e-08	7.75357e-07	down	6.94547	3.18988e-07	2.99216e-06	up	NA	NA	NA	NA	NA	NA	NA	NA	NA	NA	NA
MYB-related	TF	MYB->MYB-related	Cluster-27241.12685	0	0	0	0	0	0	50.31	64.33	58.92	0	0	0	0	0	0	788.8	1286.58	1380.96	NA	NA	NA	NA	24.5004	9.75293e-13	8.39432e-11	up	-12.5019	1.40617e-25	8.17692e-24	down	12.2301	1.38184e-24	7.1681e-23	up	NA	NA	NA	NA	NA	NA	NA	NA	NA	NA	NA
MYB-related	TF	MYB->MYB-related	Cluster-27241.13020	0	0	0	0	0	0	4.23	2.55	2.94	0	0	0	0	0	0	163.57	124.12	166.6	NA	NA	NA	NA	8.35249	0.0150307	0.0690865	false	-9.62352	9.02512e-15	2.18582e-13	down	9.35569	6.12965e-14	1.33966e-12	up	NA	NA	NA	NA	NA	NA	NA	NA	NA	NA	NA
MYB-related	TF	MYB->MYB-related	Cluster-27241.13854	0	0	0	0	0	0	11.64	14.84	18.14	0	0	0	0	0	0	195.02	316.97	453.71	NA	NA	NA	NA	9.36307	0.00640837	0.0373384	up	-10.6379	2.94111e-18	9.81455e-17	down	10.3653	1.99633e-17	6.17805e-16	up	NA	NA	NA	NA	NA	NA	NA	NA	NA	NA	NA
MYB-related	TF	MYB->MYB-related	Cluster-27241.14417	0.18	0.08	0.13	0.05	0	0	33.4	32.67	43.97	4	1	1.71	1	0	0	513.07	640.36	1010.24	NA	NA	NA	NA	7.00048	0.00231558	0.0172226	up	-10.8505	1.67678e-19	6.25932e-18	down	7.93359	1.10793e-40	1.20383e-38	up	NA	NA	NA	NA	NA	NA	NA	NA	NA	NA	NA
MYB-related	TF	MYB->MYB-related	Cluster-27241.20729	0.24	0.08	0.16	0.05	0.07	0.06	193.82	263.03	269.32	5	1	2	1	1	1	2779.93	4820.67	5790.21	NA	NA	NA	NA	9.47591	9.80291e-06	0.000183606	up	-12.0098	3.85886e-44	5.21005e-42	down	10.3716	8.86413e-78	3.05316e-75	up	950	K09422 transcription factor MYB, plant | (RefSeq) transcription repressor MYB6-like (A)	transcription factor MYB31 [Picea abies]	MYB5_ARATH RecName: Full=Transcription repressor MYB5; AltName: Full=AtM2; AltName: Full=Myb-related protein 5; Short=AtMYB5;	A0A167V911_PICAB SubName: Full=Transcription factor MYB31 {ECO:0000313|EMBL:ANB66414.1};	Transcription factor, Myb superfamily	GO:0005634,nucleus; GO:0003700,DNA-binding transcription factor activity; GO:0000981,DNA-binding transcription factor activity, RNA polymerase II-specific; GO:0043565,sequence-specific DNA binding; GO:0001135,RNA polymerase II transcription regulator recruiting activity; GO:0044212,transcription regulatory region DNA binding; GO:0048354,mucilage biosynthetic process involved in seed coat developm…	Myb-like DNA-binding domain	MYB-related	TF	MYB->MYB-related
MYB-related	TF	MYB->MYB-related	Cluster-27241.25891	0	0	0	0	0	0.04	3.88	1.9	1.62	0	0	0	0	0	1	79.66	49.55	49.21	NA	NA	NA	NA	7.06213	0.00485812	0.0304331	up	-7.36155	3.56843e-08	3.78943e-07	down	8.05831	3.20736e-09	4.1332e-08	up	1241	K09422 transcription factor MYB, plant | (RefSeq) transcription repressor MYB6-like (A)	TT2-like protein [Picea abies]	MYBC_MAIZE RecName: Full=Anthocyanin regulatory C1 protein;	A0A167V8X0_PICAB SubName: Full=Transcription factor MYB29 {ECO:0000313|EMBL:ANB66412.1};	Transcription factor, Myb superfamily	GO:0005634,nucleus; GO:0003677,DNA binding; GO:0006355,regulation of transcription, DNA-templated; GO:0006351,transcription, DNA-templated; GO:0003674,molecular_function; GO:0003676,nucleic acid binding; GO:0005488,binding; GO:0097159,organic cyclic compound binding; GO:1901363,heterocyclic compound binding; GO:0008152,metabolic process; GO:0006139,nucleobase-containing compound metabolic process…	--	MYB-related	TF	MYB->MYB-related
MYB-related	TF	MYB->MYB-related	Cluster-27241.27726	1.19	1.15	0.78	2.06	2.01	1.63	3.63	4.63	4.86	21	12	8	33	24	25	44	72	89	0.786275	0.0822916	0.15608	false	1.52099	0.00322793	0.0221973	up	-1.21489	0.000407126	0.0022333	down	2.00094	2.1962e-06	1.8011e-05	up	846	K09422 transcription factor MYB, plant | (RefSeq) transcription factor MYB6 isoform X1 (A)	unknown [Picea sitchensis]	MYBC_MAIZE RecName: Full=Anthocyanin regulatory C1 protein;	A9NQX0_PICSI SubName: Full=Uncharacterized protein {ECO:0000313|EMBL:ABK23031.1};	Transcription factor, Myb superfamily	GO:0005634,nucleus; GO:0003677,DNA binding; GO:0006355,regulation of transcription, DNA-templated; GO:0006351,transcription, DNA-templated; GO:0003674,molecular_function; GO:0003676,nucleic acid binding; GO:0005488,binding; GO:0097159,organic cyclic compound binding; GO:1901363,heterocyclic compound binding; GO:0008152,metabolic process; GO:0006139,nucleobase-containing compound metabolic process…	--	MYB-related	TF	MYB->MYB-related
MYB-related	TF	MYB->MYB-related	Cluster-27241.36934	10.79	10.68	10.33	19.54	20.07	20.77	26.34	43.2	45.97	189	111	106	311	238	316	318	669	837	0.857181	5.24039e-11	4.96102e-10	false	1.4035	7.95335e-05	0.00110826	up	-0.944207	0.000516413	0.00276858	false	1.80364	5.83453e-11	9.39965e-10	up	843	K09422 transcription factor MYB, plant | (RefSeq) transcription factor CPC-like (A)	unknown [Picea sitchensis]	CPC_ARATH RecName: Full=Transcription factor CPC; AltName: Full=Protein CAPRICE;	A9NQX0_PICSI SubName: Full=Uncharacterized protein {ECO:0000313|EMBL:ABK23031.1};	--	GO:0005634,nucleus; GO:0003700,DNA-binding transcription factor activity; GO:0000981,DNA-binding transcription factor activity, RNA polymerase II-specific; GO:0043565,sequence-specific DNA binding; GO:0001135,RNA polymerase II transcription regulator recruiting activity; GO:0044212,transcription regulatory region DNA binding; GO:0009913,epidermal cell differentiation; GO:0007275,multicellular org…	--	MYB-related	TF	MYB->MYB-related
MYB-related	TF	MYB->MYB-related	Cluster-27241.46055	11.07	10.72	11.97	12.69	12.54	11.47	33.18	33.35	32.23	592.4	341.38	383.47	622.63	457.69	531.76	1248.95	1584.49	1782.6	0.0517307	0.544994	0.671937	false	0.9341	0.0285532	0.108597	false	-1.43342	1.10707e-52	2.01093e-50	down	1.48728	9.66077e-43	1.1554e-40	up	2049	K08869 aarF domain-containing kinase | (RefSeq) predicted protein (A)	unknown [Picea sitchensis]	MYBS3_ORYSJ RecName: Full=Transcription factor MYBS3 {ECO:0000303|PubMed:12172034}; AltName: Full=Myb-related protein S3 {ECO:0000303|PubMed:12172034}; Short=OsMYBS3 {ECO:0000303|PubMed:12172034};	B8LRD4_PICSI SubName: Full=Uncharacterized protein {ECO:0000313|EMBL:ABR18214.1};	--	GO:0005634,nucleus; GO:0003677,DNA binding; GO:0003700,DNA-binding transcription factor activity; GO:0046872,metal ion binding; GO:0045892,negative regulation of transcription, DNA-templated; GO:0009723,response to ethylene; GO:0009739,response to gibberellin; GO:0009744,response to sucrose; GO:0006351,transcription, DNA-templated; GO:0003674,molecular_function; GO:0003676,nucleic acid binding; G…	Myb-like DNA-binding domain	MYB-related	TF	MYB->MYB-related
MYB-related	TF	MYB->MYB-related	Cluster-27241.48142	3.65	3.86	3.04	3.08	2.25	2.88	1.44	1.61	1.47	105	66	52	81	44	72	29	41	44	-0.42515	0.0729887	0.141298	false	-0.802867	0.0165304	0.073968	false	0.858337	0.00640424	0.0253202	false	-1.28303	1.63273e-05	0.000115501	down	1221	K09422 transcription factor MYB, plant | (RefSeq) myb-related protein 308 (A)	R2R3-MYB transcription factor MYB21, partial [Pinus taeda]	MYB4_ARATH RecName: Full=Transcription repressor MYB4; AltName: Full=Myb-related protein 4; Short=AtMYB4;	C0JTE1_PINTA SubName: Full=R2R3-MYB transcription factor MYB21 {ECO:0000313|EMBL:ACN12964.1}; Flags: Fragment;	Transcription factor, Myb superfamily	GO:0005634,nucleus; GO:0003677,DNA binding; GO:0003700,DNA-binding transcription factor activity; GO:0000981,DNA-binding transcription factor activity, RNA polymerase II-specific; GO:0043565,sequence-specific DNA binding; GO:0001135,RNA polymerase II transcription regulator recruiting activity; GO:0044212,transcription regulatory region DNA binding; GO:0030154,cell differentiation; GO:1903086,neg…	Myb-like DNA-binding domain	MYB-related	TF	MYB->MYB-related
MYB-related	TF	MYB->MYB-related	Cluster-27241.51359	4.97	6.57	4.81	11.88	8.37	9.47	22.42	10.22	11.44	690.25	543.9	402.49	1516.5	794.61	1138.31	2202.99	1261.97	1638.09	0.789502	2.90105e-08	1.95609e-07	false	1.09591	0.00047026	0.00485254	up	-0.572203	0.0869669	0.215379	false	1.36606	7.18408e-05	0.000447627	up	4908	K12133 MYB-related transcription factor LHY | (RefSeq) protein LHY (A)	putative LHY [Cryptomeria japonica]	CCA1_ARATH RecName: Full=Protein CCA1 {ECO:0000303|PubMed:9144958}; AltName: Full=MYB-related transcription factor CCA1 {ECO:0000303|PubMed:9144958}; AltName: Full=Protein CIRCADIAN CLOCK ASSOCIATED 1 {ECO:0000303|PubMed:9144958};	A0A0C9S8A2_9SPER SubName: Full=TSA: Wollemia nobilis Ref_Wollemi_Transcript_11910_4056 transcribed RNA sequence {ECO:0000313|EMBL:JAG87628.1};	Zuotin and related molecular chaperones (DnaJ superfamily), contains DNA-binding domains	GO:0005634,nucleus; GO:0003677,DNA binding; GO:0003700,DNA-binding transcription factor activity; GO:0043565,sequence-specific DNA binding; GO:0007623,circadian rhythm; GO:0048574,long-day photoperiodism, flowering; GO:0042754,negative regulation of circadian rhythm; GO:0045892,negative regulation of transcription, DNA-templated; GO:0045893,positive regulation of transcription, DNA-templated; GO:…	Myb-like DNA-binding domain	MYB-related	TF	MYB->MYB-related
MYB-related	TF	MYB->MYB-related	Cluster-27241.52400	5.57	4.59	5.54	9	8.91	8.21	10.1	12.2	13.38	96	47	56	141	104	123	120	186	240	0.6589	0.000703697	0.00242822	false	0.907437	0.000140443	0.00178557	false	-0.461435	0.0317273	0.097297	false	1.12457	5.911e-06	4.50838e-05	up	834	K09422 transcription factor MYB, plant | (RefSeq) myb-related protein 308 (A)	R2R3MYB31 [Ginkgo biloba]	MYBP_MAIZE RecName: Full=Myb-related protein P;	A0A222UB34_GINBI SubName: Full=R2R3MYB31 {ECO:0000313|EMBL:ASR18116.1};	Transcription factor, Myb superfamily	GO:0005634,nucleus; GO:0003677,DNA binding; GO:0006355,regulation of transcription, DNA-templated; GO:0006351,transcription, DNA-templated; GO:0003674,molecular_function; GO:0003676,nucleic acid binding; GO:0005488,binding; GO:0097159,organic cyclic compound binding; GO:1901363,heterocyclic compound binding; GO:0008152,metabolic process; GO:0006139,nucleobase-containing compound metabolic process…	--	MYB-related	TF	MYB->MYB-related
MYB-related	TF	MYB->MYB-related	Cluster-27241.53484	8.42	8.77	8.2	13.17	11.66	12.1	24.45	16.43	17.02	795	493	465	1141	751	988	1629	1377	1657	0.47036	1.86496e-11	1.85685e-10	false	0.824215	0.000864916	0.00784379	false	-0.651695	0.000800885	0.00410926	false	1.12329	2.97487e-08	3.35049e-07	up	3416	K22825 non-structural maintenance of chromosomes element 4 | (RefSeq) non-structural maintenance of chromosomes element 4 homolog A-like (A)	SWR1 complex bromodomain subunit bdf1 [Amborella trichopoda]	--	A0A0D6R6X0_ARACU SubName: Full=Uncharacterized protein {ECO:0000313|EMBL:JAG97650.1};	--	--	Bromodomain	MYB-related	TF	MYB->MYB-related
MYB-related	TF	MYB->MYB-related	Cluster-27241.55173	74.25	71.56	54.58	92.37	100.14	91.2	207.09	176.84	160.98	22	12	6	21	17	25	31	41	55	NA	NA	NA	NA	0.991728	0.037408	0.130132	false	-0.910737	0.0182272	0.0616064	false	1.37634	0.00464513	0.0183168	up	210	K09422 transcription factor MYB, plant | (RefSeq) transcription repressor MYB4 (A)	MYB transcription factor MYB5 [Pinus radiata]	MYB4_ARATH RecName: Full=Transcription repressor MYB4; AltName: Full=Myb-related protein 4; Short=AtMYB4;	A0A1W2KRF5_PINRA SubName: Full=MYB transcription factor MYB5 {ECO:0000313|EMBL:AQW79621.1};	Transcription factor, Myb superfamily	GO:0005634,nucleus; GO:0003677,DNA binding; GO:0003700,DNA-binding transcription factor activity; GO:0000981,DNA-binding transcription factor activity, RNA polymerase II-specific; GO:0043565,sequence-specific DNA binding; GO:0001135,RNA polymerase II transcription regulator recruiting activity; GO:0044212,transcription regulatory region DNA binding; GO:0030154,cell differentiation; GO:1903086,neg…	--	MYB-related	TF	MYB->MYB-related
MYB-related	TF	MYB->MYB-related	Cluster-27241.55176	28.21	32.38	32.36	57.97	43.92	52.31	95	119.03	117.95	147	99	92	267	151	239	321	540	651	0.694936	2.83364e-05	0.00012547	false	1.34026	0.000472969	0.00487593	up	-1.10933	4.30194e-07	3.87912e-06	down	1.80056	2.64862e-17	8.12368e-16	up	428	K09422 transcription factor MYB, plant | (RefSeq) transcription repressor MYB4-like (A)	MYB transcription factor MYB5 [Pinus radiata]	MYB4_ARATH RecName: Full=Transcription repressor MYB4; AltName: Full=Myb-related protein 4; Short=AtMYB4;	A0A1W2KRF5_PINRA SubName: Full=MYB transcription factor MYB5 {ECO:0000313|EMBL:AQW79621.1};	Transcription factor, Myb superfamily	GO:0005634,nucleus; GO:0003677,DNA binding; GO:0003700,DNA-binding transcription factor activity; GO:0000981,DNA-binding transcription factor activity, RNA polymerase II-specific; GO:0043565,sequence-specific DNA binding; GO:0001135,RNA polymerase II transcription regulator recruiting activity; GO:0044212,transcription regulatory region DNA binding; GO:0030154,cell differentiation; GO:1903086,neg…	Myb-like DNA-binding domain	MYB-related	TF	MYB->MYB-related
MYB-related	TF	MYB->MYB-related	Cluster-27241.90388	0.9	1.98	1.1	1.4	2.54	1.86	6.78	14.52	11.3	10	13	7	14	19	18	51	142	131	NA	NA	NA	NA	2.22641	0.00827076	0.0452089	up	-2.51415	3.04723e-07	2.80516e-06	down	3.01308	4.34133e-08	4.74109e-07	up	NA	NA	NA	NA	NA	NA	NA	NA	NA	NA	NA
MYB-related	TF	MYB->MYB-related	Cluster-27241.97264	0.76	1.17	0.98	0.77	0.93	0.96	1.74	3.15	2.97	26.06	23.82	20.03	24.02	21.61	28.57	41.76	95.9	105.58	-0.17337	0.669318	0.776585	false	0.800874	0.171375	0.358418	false	-1.57101	0.000146966	0.000879274	down	1.394	0.00130111	0.00606105	up	NA	NA	NA	NA	NA	NA	NA	NA	NA	NA	NA
MYB-related	TF	MYB->MYB-related	Cluster-27241.21039	4.3	4.3	5.87	3.3	2.14	2.53	5.35	8.42	8.48	86	51	69	60	29	44	74	149	176	-0.912032	0.00121085	0.00397545	false	0.000578113	0.999116	0.999656	false	-1.48854	2.28327e-05	0.00015939	down	0.570596	0.0819665	0.190033	false	926	K15397 3-ketoacyl-CoA synthase [EC:2.3.1.199] | (RefSeq) 3-ketoacyl-CoA synthase 17-like (A)	unknown [Picea sitchensis]	RAD_ANTMA RecName: Full=Transcription factor RADIALIS;	D5ADC1_PICSI SubName: Full=Uncharacterized protein {ECO:0000313|EMBL:ADE77540.1};	Zuotin and related molecular chaperones (DnaJ superfamily), contains DNA-binding domains	GO:0005634,nucleus; GO:0003677,DNA binding; GO:0048262,determination of dorsal/ventral asymmetry; GO:0009908,flower development; GO:0006355,regulation of transcription, DNA-templated; GO:0006351,transcription, DNA-templated; GO:0003674,molecular_function; GO:0003676,nucleic acid binding; GO:0005488,binding; GO:0097159,organic cyclic compound binding; GO:1901363,heterocyclic compound binding; GO:0…	--	MYB-related	TF	MYB->MYB-related
MYB-related	TF	MYB->MYB-related	Cluster-27241.64647	2.79	3.46	2.71	5.18	7.58	5.14	2.63	2.89	2.32	213.46	157.59	124.45	363.72	395.85	340.16	141.75	196.49	183.46	0.926768	7.58569e-07	4.25715e-06	false	0.443936	0.269274	0.476272	false	1.18504	1.66974e-06	1.38414e-05	up	-0.254764	0.249862	0.42223	false	2818	K00784 ribonuclease Z [EC:3.1.26.11] | (RefSeq) tRNase Z TRZ1 isoform X1 (A)	unknown [Picea sitchensis]	SRM1_ARATH RecName: Full=Transcription factor SRM1 {ECO:0000305}; AltName: Full=Myb-related protein SRM1 {ECO:0000305}; AltName: Full=Protein SALT-RELATED MYB 1 {ECO:0000303|PubMed:26243618};	A0A0D6R5A2_ARACU SubName: Full=Uncharacterized protein {ECO:0000313|EMBL:JAG97984.1};	Zuotin and related molecular chaperones (DnaJ superfamily), contains DNA-binding domains	GO:0005634,nucleus; GO:0003677,DNA binding; GO:0003700,DNA-binding transcription factor activity; GO:0009738,abscisic acid-activated signaling pathway; GO:1901001,negative regulation of response to salt stress; GO:0010116,positive regulation of abscisic acid biosynthetic process; GO:1905615,positive regulation of developmental vegetative growth; GO:0045893,positive regulation of transcription, DN…	Myb-like DNA-binding domain	MYB-related	TF	MYB->MYB-related
MYB-related	TF	MYB->MYB-related	Cluster-27241.77986	0	0	0.83	5.63	5.14	7.32	0	0	0	0	0	27.32	284.37	193.29	349.61	0	0	0	4.38322	0.0519071	0.10666	false	3.36628	0.298302	0.507244	false	10.6082	3.03303e-18	1.01022e-16	up	NA	NA	NA	NA	NA	NA	NA	NA	NA	NA	NA	NA	NA	NA	NA
AP2/ERF-ERF	TF	AP2/ERF->AP2/ERF-ERF	Cluster-26465.0	0.92	0.93	1.76	3.68	3.97	2.12	1.5	1.99	2.11	10	6	11	36	29	20	11	19	24	1.38889	0.0109141	0.028089	up	1.04067	0.0423358	0.141333	false	0.773349	0.119809	0.27385	false	NA	NA	NA	NA	620	K09286 EREBP-like factor | (RefSeq) ethylene-responsive transcription factor ERF011 (A)	ethylene-responsive transcription factor ERF015 [Setaria italica]	ERF11_ARATH RecName: Full=Ethylene-responsive transcription factor ERF011;	K3Y2A1_SETIT SubName: Full=Uncharacterized protein {ECO:0000313|EMBL:KQL09348.1, ECO:0000313|EnsemblPlants:Si008323m};	--	GO:0005634,nucleus; GO:0003677,DNA binding; GO:0003700,DNA-binding transcription factor activity; GO:0042742,defense response to bacterium; GO:0009873,ethylene-activated signaling pathway; GO:0010941,regulation of cell death; GO:0009617,response to bacterium; GO:0010200,response to chitin; GO:0009409,response to cold; GO:0006351,transcription, DNA-templated; GO:0003674,molecular_function; GO:0003…	AP2 domain	AP2/ERF-ERF	TF	AP2/ERF->AP2/ERF-ERF
AP2/ERF-ERF	TF	AP2/ERF->AP2/ERF-ERF	Cluster-27241.104278	3.04	3.91	3.3	1.83	1.25	0.83	0.9	2.06	2.64	57.02	43.49	36.27	31.27	15.82	13.49	11.62	34.19	51.3	-1.45676	0.000155034	0.000606217	down	-1.15848	0.00909687	0.0483312	down	-0.557836	0.371405	0.589657	false	-0.903513	0.0697289	0.167712	false	NA	NA	NA	NA	NA	NA	NA	NA	NA	NA	NA
AP2/ERF-ERF	TF	AP2/ERF->AP2/ERF-ERF	Cluster-27241.105073	2.73	3.05	2.74	7.63	6.91	7.54	1.76	2.39	2.49	89	59	53	227	153	213	40	69	84	1.3127	3.40885e-14	4.33879e-13	up	0.675369	0.212606	0.411795	false	1.71753	4.05329e-13	8.35287e-12	up	-0.41161	0.161093	0.310838	false	NA	NA	NA	NA	NA	NA	NA	NA	NA	NA	NA
AP2/ERF-ERF	TF	AP2/ERF->AP2/ERF-ERF	Cluster-27241.112937	0.81	0.95	1.45	0	0.26	0.48	0	0	0	25.97	17.93	27.41	0	5.73	13.22	0	0	0	-2.15383	0.0149101	0.0367862	down	-3.16365	0.0784159	0.21442	false	NA	NA	NA	NA	-7.37352	1.26786e-07	1.27878e-06	down	NA	NA	NA	NA	NA	NA	NA	NA	NA	NA	NA
AP2/ERF-ERF	TF	AP2/ERF->AP2/ERF-ERF	Cluster-27241.112938	0.22	0.3	0.37	5.04	4.71	3.25	0	0	0	7.6	6.07	7.54	156.26	108.71	95.61	0	0	0	3.78067	5.16133e-21	1.08551e-19	up	2.71872	0.157284	0.339579	false	9.42158	2.72977e-14	6.30369e-13	up	NA	NA	NA	NA	NA	NA	NA	NA	NA	NA	NA	NA	NA	NA	NA
AP2/ERF-ERF	TF	AP2/ERF->AP2/ERF-ERF	Cluster-27241.112939	0	0	0	4.41	4.9	5.75	0	0	0	0	0	0	130.04	107.61	160.91	0	0	0	9.2163	1.89047e-14	2.47074e-13	up	8.20539	0.00448052	0.0287527	up	9.57078	6.27313e-15	1.55347e-13	up	NA	NA	NA	NA	NA	NA	NA	NA	NA	NA	NA	NA	NA	NA	NA
AP2/ERF-ERF	TF	AP2/ERF->AP2/ERF-ERF	Cluster-27241.112940	0.43	0	0	2.07	1.74	3.09	0	0	0	8.43	0	0.05	36.7	22.95	52.26	0	0	0	3.75694	2.53667e-05	0.000113223	up	2.97563	0.243172	0.44715	false	7.71735	1.07373e-08	1.24588e-07	up	NA	NA	NA	NA	NA	NA	NA	NA	NA	NA	NA	NA	NA	NA	NA
AP2/ERF-ERF	TF	AP2/ERF->AP2/ERF-ERF	Cluster-27241.129813	3.09	1.8	2.43	0.68	0	0	0	0	0.33	62.27	21.52	28.85	12.47	0	0	0	0	7	-3.53525	0.000308481	0.00114241	down	-3.96704	0.013377	0.0637009	false	NA	NA	NA	NA	-4.41981	0.000123861	0.000735564	down	NA	NA	NA	NA	NA	NA	NA	NA	NA	NA	NA
AP2/ERF-ERF	TF	AP2/ERF->AP2/ERF-ERF	Cluster-27241.15421	1.9	1.73	2.14	0.56	0.29	0.2	0.43	0.49	0.26	48	26	32	12.87	4.9	4.29	7.57	11	6.77	-2.53279	9.68333e-07	5.34436e-06	down	-2.4342	2.45723e-08	8.78668e-07	down	NA	NA	NA	NA	-2.32942	6.64487e-06	5.03245e-05	down	NA	NA	NA	NA	NA	NA	NA	NA	NA	NA	NA
AP2/ERF-ERF	TF	AP2/ERF->AP2/ERF-ERF	Cluster-27241.21424	1.05	2.38	2.02	0.2	0	0.09	0.05	0.39	0.11	28.91	38.95	32.87	4.98	0	2.25	1.03	9.61	3.15	-4.24422	4.91626e-08	3.23191e-07	down	-3.71564	8.52124e-06	0.000162814	down	NA	NA	NA	NA	-3.30168	0.000119521	0.000713032	down	1177	K09286 EREBP-like factor | (RefSeq) ethylene-responsive transcription factor 2 (A)	unknown [Picea sitchensis]	EF100_ARATH RecName: Full=Ethylene-responsive transcription factor 1A; Short=AtERF1A; AltName: Full=Ethylene-responsive element-binding factor 1A; Short=EREBP-1A;	C0PQI3_PICSI SubName: Full=Uncharacterized protein {ECO:0000313|EMBL:ACN40073.1};	--	GO:0005634,nucleus; GO:0003677,DNA binding; GO:0003700,DNA-binding transcription factor activity; GO:0051301,cell division; GO:0006952,defense response; GO:0009873,ethylene-activated signaling pathway; GO:0010087,phloem or xylem histogenesis; GO:0010200,response to chitin; GO:0006351,transcription, DNA-templated; GO:0003674,molecular_function; GO:0003676,nucleic acid binding; GO:0005488,binding; …	AP2 domain	AP2/ERF-ERF	TF	AP2/ERF->AP2/ERF-ERF
AP2/ERF-ERF	TF	AP2/ERF->AP2/ERF-ERF	Cluster-27241.37781	0.72	0.85	1.11	3.16	2.65	4.12	0.63	0.16	0.21	10	7	9	40	25	50	6	2	3	1.868	0.000115356	0.000461777	up	0.964671	0.352392	0.561328	false	3.40826	1.51978e-06	1.26759e-05	up	NA	NA	NA	NA	724	K09286 EREBP-like factor | (RefSeq) ethylene-responsive transcription factor TINY-like (A)	unknown [Picea sitchensis]	TINY_ARATH RecName: Full=Ethylene-responsive transcription factor TINY;	B8LM17_PICSI SubName: Full=Uncharacterized protein {ECO:0000313|EMBL:ABR16697.1};	--	GO:0005634,nucleus; GO:0003677,DNA binding; GO:0003700,DNA-binding transcription factor activity; GO:0006351,transcription, DNA-templated; GO:0003674,molecular_function; GO:0003676,nucleic acid binding; GO:0005488,binding; GO:0097159,organic cyclic compound binding; GO:1901363,heterocyclic compound binding; GO:0140110,transcription regulator activity; GO:0008152,metabolic process; GO:0006139,nucl…	AP2 domain	AP2/ERF-ERF	TF	AP2/ERF->AP2/ERF-ERF
AP2/ERF-ERF	TF	AP2/ERF->AP2/ERF-ERF	Cluster-27241.42663	2.05	1.91	2.57	0.4	0.8	0.77	0.78	0.52	0.26	40.42	22.45	29.85	7.27	10.68	13.2	10.62	9.12	5.34	-1.79769	0.000214045	0.000816422	down	-1.97366	2.98028e-05	0.000485689	down	NA	NA	NA	NA	-2.15164	0.000451196	0.00237412	down	918	K09286 EREBP-like factor | (RefSeq) ethylene-responsive transcription factor ERF023-like (A)	unknown [Picea sitchensis]	ERF17_ARATH RecName: Full=Ethylene-responsive transcription factor ERF017;	A9NK16_PICSI SubName: Full=Uncharacterized protein {ECO:0000313|EMBL:ABK20977.1};	--	GO:0005634,nucleus; GO:0003677,DNA binding; GO:0003700,DNA-binding transcription factor activity; GO:0009873,ethylene-activated signaling pathway; GO:0006351,transcription, DNA-templated; GO:0003674,molecular_function; GO:0003676,nucleic acid binding; GO:0005488,binding; GO:0097159,organic cyclic compound binding; GO:1901363,heterocyclic compound binding; GO:0140110,transcription regulator activi…	AP2 domain	AP2/ERF-ERF	TF	AP2/ERF->AP2/ERF-ERF
AP2/ERF-ERF	TF	AP2/ERF->AP2/ERF-ERF	Cluster-27241.42668	3.06	4.98	2.12	0.95	1.23	1.11	1.09	2.06	1.44	33.06	31.78	13.13	9.3	8.97	10.43	8	19.56	16.29	-1.72518	0.00191035	0.00597769	down	-1.43021	0.00286237	0.0201745	down	NA	NA	NA	NA	-1.18559	0.0527174	0.134883	false	618	K09286 EREBP-like factor | (RefSeq) ethylene-responsive transcription factor ERF023-like (A)	unknown [Picea sitchensis]	ERF16_ARATH RecName: Full=Ethylene-responsive transcription factor ERF016;	A9NK16_PICSI SubName: Full=Uncharacterized protein {ECO:0000313|EMBL:ABK20977.1};	--	GO:0005634,nucleus; GO:0003677,DNA binding; GO:0003700,DNA-binding transcription factor activity; GO:0009873,ethylene-activated signaling pathway; GO:0006351,transcription, DNA-templated; GO:0003674,molecular_function; GO:0003676,nucleic acid binding; GO:0005488,binding; GO:0097159,organic cyclic compound binding; GO:1901363,heterocyclic compound binding; GO:0140110,transcription regulator activi…	AP2 domain	AP2/ERF-ERF	TF	AP2/ERF->AP2/ERF-ERF
AP2/ERF-ERF	TF	AP2/ERF->AP2/ERF-ERF	Cluster-27241.42669	9.79	11.71	7.3	1.83	1.97	3.81	1.41	1.48	1.32	65.14	45.87	27.05	10.88	8.72	22.16	6.18	8.62	9.22	-1.94879	1.26554e-05	5.92581e-05	down	-2.33678	5.2222e-07	1.36108e-05	down	NA	NA	NA	NA	-2.83689	3.42594e-08	3.81393e-07	down	478	K09286 EREBP-like factor | (RefSeq) ethylene-responsive transcription factor ERF023-like (A)	unknown [Picea sitchensis]	ERF16_ARATH RecName: Full=Ethylene-responsive transcription factor ERF016;	A9NK16_PICSI SubName: Full=Uncharacterized protein {ECO:0000313|EMBL:ABK20977.1};	--	GO:0005634,nucleus; GO:0003677,DNA binding; GO:0003700,DNA-binding transcription factor activity; GO:0009873,ethylene-activated signaling pathway; GO:0006351,transcription, DNA-templated; GO:0003674,molecular_function; GO:0003676,nucleic acid binding; GO:0005488,binding; GO:0097159,organic cyclic compound binding; GO:1901363,heterocyclic compound binding; GO:0140110,transcription regulator activi…	AP2 domain	AP2/ERF-ERF	TF	AP2/ERF->AP2/ERF-ERF
AP2/ERF-ERF	TF	AP2/ERF->AP2/ERF-ERF	Cluster-27241.42673	1.63	1.88	1.66	0.45	0.55	0.85	0.46	0.43	0.64	32.04	22.02	19.27	7.99	7.3	14.61	6.29	7.41	13	-1.53188	0.00314574	0.00933881	down	-1.68694	7.0992e-05	0.00101405	down	NA	NA	NA	NA	-1.84375	0.000763715	0.00379642	down	916	K09286 EREBP-like factor | (RefSeq) dehydration-responsive element-binding protein 3 (A)	unknown [Picea sitchensis]	ERF17_ARATH RecName: Full=Ethylene-responsive transcription factor ERF017;	A9NK16_PICSI SubName: Full=Uncharacterized protein {ECO:0000313|EMBL:ABK20977.1};	--	GO:0005634,nucleus; GO:0003677,DNA binding; GO:0003700,DNA-binding transcription factor activity; GO:0009873,ethylene-activated signaling pathway; GO:0006351,transcription, DNA-templated; GO:0003674,molecular_function; GO:0003676,nucleic acid binding; GO:0005488,binding; GO:0097159,organic cyclic compound binding; GO:1901363,heterocyclic compound binding; GO:0140110,transcription regulator activi…	AP2 domain	AP2/ERF-ERF	TF	AP2/ERF->AP2/ERF-ERF
AP2/ERF-ERF	TF	AP2/ERF->AP2/ERF-ERF	Cluster-27241.42683	5.48	4.44	4.08	0.97	0.31	1.49	0	0.18	0.06	106.02	51	46.42	17	4	25	0	3	1.25	-2.37475	1.04247e-07	6.54575e-07	down	-3.28881	0.00210694	0.0159315	down	NA	NA	NA	NA	-5.94891	1.69953e-12	3.18664e-11	down	904	K09286 EREBP-like factor | (RefSeq) ethylene-responsive transcription factor ERF023-like (A)	unknown [Picea sitchensis]	ERF18_ARATH RecName: Full=Ethylene-responsive transcription factor ERF018;	A9NQM1_PICSI SubName: Full=Uncharacterized protein {ECO:0000313|EMBL:ABK22932.1};	--	GO:0005634,nucleus; GO:0003677,DNA binding; GO:0003700,DNA-binding transcription factor activity; GO:0051301,cell division; GO:0002213,defense response to insect; GO:0009873,ethylene-activated signaling pathway; GO:0010087,phloem or xylem histogenesis; GO:0009611,response to wounding; GO:0006351,transcription, DNA-templated; GO:0003674,molecular_function; GO:0003676,nucleic acid binding; GO:00054…	AP2 domain	AP2/ERF-ERF	TF	AP2/ERF->AP2/ERF-ERF
AP2/ERF-ERF	TF	AP2/ERF->AP2/ERF-ERF	Cluster-27241.44456	1.64	2	1.66	0.73	0.9	0.58	1.97	3.37	3.61	38.78	28.06	23.09	15.74	14.37	11.88	32.3	70.4	88.35	-1.34306	0.00146745	0.00472582	down	0.00599606	0.992948	0.996814	false	-2.03861	1.80462e-05	0.000127928	down	0.698565	0.0900481	0.203598	false	1046	K09286 EREBP-like factor | (RefSeq) ethylene-responsive transcription factor 1A (A)	transcription factor 3, partial [Pinus densata]	EF100_ARATH RecName: Full=Ethylene-responsive transcription factor 1A; Short=AtERF1A; AltName: Full=Ethylene-responsive element-binding factor 1A; Short=EREBP-1A;	J7H914_9SPER SubName: Full=Transcription factor 3 {ECO:0000313|EMBL:AFP90354.1}; Flags: Fragment;	--	GO:0005634,nucleus; GO:0003677,DNA binding; GO:0003700,DNA-binding transcription factor activity; GO:0051301,cell division; GO:0006952,defense response; GO:0009873,ethylene-activated signaling pathway; GO:0010087,phloem or xylem histogenesis; GO:0010200,response to chitin; GO:0006351,transcription, DNA-templated; GO:0003674,molecular_function; GO:0003676,nucleic acid binding; GO:0005488,binding; …	AP2 domain	AP2/ERF-ERF	TF	AP2/ERF->AP2/ERF-ERF
AP2/ERF-ERF	TF	AP2/ERF->AP2/ERF-ERF	Cluster-27241.44457	3.68	3.9	3.68	1.88	2.01	1.89	6.45	10.41	10.75	85.52	53.78	50.49	39.73	31.72	38.12	104.05	214.01	258.99	-1.02687	7.94966e-05	0.000327557	down	0.505882	0.455478	0.652799	false	-2.2628	1.20748e-11	2.08785e-10	down	1.23777	5.59074e-05	0.00035575	up	1034	K09286 EREBP-like factor | (RefSeq) ethylene-responsive transcription factor 1A (A)	transcription factor 3, partial [Pinus armandii]	EF100_ARATH RecName: Full=Ethylene-responsive transcription factor 1A; Short=AtERF1A; AltName: Full=Ethylene-responsive element-binding factor 1A; Short=EREBP-1A;	J7H385_PINAR SubName: Full=Transcription factor 3 {ECO:0000313|EMBL:AFP90363.1}; Flags: Fragment;	--	GO:0005634,nucleus; GO:0003677,DNA binding; GO:0003700,DNA-binding transcription factor activity; GO:0051301,cell division; GO:0006952,defense response; GO:0009873,ethylene-activated signaling pathway; GO:0010087,phloem or xylem histogenesis; GO:0010200,response to chitin; GO:0006351,transcription, DNA-templated; GO:0003674,molecular_function; GO:0003676,nucleic acid binding; GO:0005488,binding; …	AP2 domain	AP2/ERF-ERF	TF	AP2/ERF->AP2/ERF-ERF
AP2/ERF-ERF	TF	AP2/ERF->AP2/ERF-ERF	Cluster-27241.44461	7.82	6.48	9.14	1.78	2.38	2.29	2.79	3.86	1.68	35	17	22	7	7	9	8	15	8	-1.90758	0.000301004	0.00111741	down	-1.72225	6.88843e-05	0.000988142	down	NA	NA	NA	NA	-1.54777	0.00669052	0.0250052	down	402	K09286 EREBP-like factor | (RefSeq) ethylene-responsive transcription factor 1A-like (A)	unknown [Picea sitchensis]	ERF2_TOBAC RecName: Full=Ethylene-responsive transcription factor 2; Short=NtERF2; AltName: Full=Ethylene-responsive element-binding factor 2; Short=EREBP-2;	C0PQI3_PICSI SubName: Full=Uncharacterized protein {ECO:0000313|EMBL:ACN40073.1};	--	GO:0005634,nucleus; GO:0003677,DNA binding; GO:0003700,DNA-binding transcription factor activity; GO:0006952,defense response; GO:0009873,ethylene-activated signaling pathway; GO:0006351,transcription, DNA-templated; GO:0003674,molecular_function; GO:0003676,nucleic acid binding; GO:0005488,binding; GO:0097159,organic cyclic compound binding; GO:1901363,heterocyclic compound binding; GO:0140110,t…	AP2 domain	AP2/ERF-ERF	TF	AP2/ERF->AP2/ERF-ERF
AP2/ERF-ERF	TF	AP2/ERF->AP2/ERF-ERF	Cluster-27241.44663	2.05	3.12	1.47	4.22	5.37	5.77	4.23	2.39	2.54	31	28	13	58	55	76	44	32	40	1.15288	0.00131766	0.00428948	up	0.811532	0.0577811	0.173945	false	0.766826	0.046116	0.131672	false	0.393377	0.439332	0.614687	false	764	K09284 AP2-like factor, euAP2 lineage | (RefSeq) floral homeotic protein APETALA 2 (A)	AP2L1 [Pinus tabuliformis]	AP2_ARATH RecName: Full=Floral homeotic protein APETALA 2 {ECO:0000303|PubMed:7919989};	A0A0K0M790_PINTB SubName: Full=AP2L1 {ECO:0000313|EMBL:AJP06234.1};	--	GO:0005634,nucleus; GO:0003677,DNA binding; GO:0003700,DNA-binding transcription factor activity; GO:0030154,cell differentiation; GO:0009908,flower development; GO:0010073,meristem maintenance; GO:0048481,plant ovule development; GO:0048316,seed development; GO:0010093,specification of floral organ identity; GO:0006351,transcription, DNA-templated; GO:0003674,molecular_function; GO:0003676,nucle…	AP2 domain	AP2/ERF-ERF	TF	AP2/ERF->AP2/ERF-ERF
AP2/ERF-ERF	TF	AP2/ERF->AP2/ERF-ERF	Cluster-27241.59018	1.54	2.2	2.62	0.3	0.7	1.1	0.38	1.39	1.07	35.44	29.92	35.47	6.19	10.86	21.95	6	28.18	25.53	-1.64286	0.00268526	0.00812557	down	-1.39958	0.0146822	0.0679746	false	NA	NA	NA	NA	-1.18602	0.0543241	0.138112	false	1025	K09286 EREBP-like factor | (RefSeq) ethylene-responsive transcription factor TINY-like (A)	unknown [Picea sitchensis]	TINY_ARATH RecName: Full=Ethylene-responsive transcription factor TINY;	B8LM17_PICSI SubName: Full=Uncharacterized protein {ECO:0000313|EMBL:ABR16697.1};	--	GO:0005634,nucleus; GO:0003677,DNA binding; GO:0003700,DNA-binding transcription factor activity; GO:0006351,transcription, DNA-templated; GO:0003674,molecular_function; GO:0003676,nucleic acid binding; GO:0005488,binding; GO:0097159,organic cyclic compound binding; GO:1901363,heterocyclic compound binding; GO:0140110,transcription regulator activity; GO:0008152,metabolic process; GO:0006139,nucl…	AP2 domain	AP2/ERF-ERF	TF	AP2/ERF->AP2/ERF-ERF
AP2/ERF-ERF	TF	AP2/ERF->AP2/ERF-ERF	Cluster-27241.80722	0.19	0.04	0.5	0.55	2.17	1.53	2.41	1.23	1.61	6.77	0.78	10.63	18.06	52.92	47.48	60.55	39.26	59.97	2.42997	0.00161996	0.00515812	up	2.58822	0.000161608	0.00200439	up	-0.311089	0.61285	0.785442	false	2.74564	0.000452927	0.00238214	up	NA	NA	NA	NA	NA	NA	NA	NA	NA	NA	NA
AP2/ERF-ERF	TF	AP2/ERF->AP2/ERF-ERF	Cluster-27241.85961	10.51	11.68	12.25	5.34	5.87	6.36	5.01	8.19	7.05	599	396	418	279	228	314	201	414	415	-1.03904	4.17198e-18	7.28259e-17	down	-0.935634	1.2218e-06	2.90609e-05	false	-0.212627	0.404776	0.620888	false	-0.827856	0.000443116	0.00233553	false	NA	NA	NA	NA	NA	NA	NA	NA	NA	NA	NA
AP2/ERF-ERF	TF	AP2/ERF->AP2/ERF-ERF	Cluster-27241.86279	1.89	2.36	2.96	0.6	0.74	0.83	0.35	0.82	0.87	47.22	35.07	43.77	13.69	12.48	17.9	6	18.18	22.49	-1.80187	7.094e-06	3.45195e-05	down	-1.84165	1.10024e-06	2.64587e-05	down	NA	NA	NA	NA	-1.87822	0.000350943	0.00189525	down	NA	NA	NA	NA	NA	NA	NA	NA	NA	NA	NA
AP2/ERF-ERF	TF	AP2/ERF->AP2/ERF-ERF	Cluster-27241.86597	0.22	0.27	0.21	0.67	0.95	0.62	1.52	0.39	0.36	12.42	9	6.99	33.7	35.63	29.77	58.98	18.9	20.37	1.61216	0.000787367	0.00269036	up	1.59912	0.00690688	0.0396132	up	0.0107203	0.988015	0.995446	false	NA	NA	NA	NA	NA	NA	NA	NA	NA	NA	NA	NA	NA	NA	NA
AP2/ERF-ERF	TF	AP2/ERF->AP2/ERF-ERF	Cluster-27241.92764	0.81	0.41	0.02	1.52	1.69	1.59	6.79	6.43	5.89	36.48	11.15	0.65	62.75	52.05	62.3	215.14	257.51	274.86	1.8357	0.00321358	0.0095202	up	3.18322	8.68814e-05	0.00119401	up	-2.00005	2.01121e-22	9.43713e-21	down	3.84945	2.61443e-08	2.97494e-07	up	NA	NA	NA	NA	NA	NA	NA	NA	NA	NA	NA
AP2/ERF-ERF	TF	AP2/ERF->AP2/ERF-ERF	Cluster-10322.0	0	0	0	0	0	0	0.8	3.26	2.61	0	0	0	0	0	0	7	37	35	NA	NA	NA	NA	5.72133	0.0558129	0.170087	false	-6.99706	8.89588e-06	6.60379e-05	down	6.72058	2.28895e-05	0.000157839	up	687	K09286 EREBP-like factor | (RefSeq) ethylene-responsive transcription factor 1-like (A)	unknown [Picea sitchensis]	ERF2_TOBAC RecName: Full=Ethylene-responsive transcription factor 2; Short=NtERF2; AltName: Full=Ethylene-responsive element-binding factor 2; Short=EREBP-2;	A9NMA3_PICSI SubName: Full=Uncharacterized protein {ECO:0000313|EMBL:ABK21764.1};	--	GO:0005634,nucleus; GO:0003677,DNA binding; GO:0003700,DNA-binding transcription factor activity; GO:0006952,defense response; GO:0009873,ethylene-activated signaling pathway; GO:0006351,transcription, DNA-templated; GO:0003674,molecular_function; GO:0003676,nucleic acid binding; GO:0005488,binding; GO:0097159,organic cyclic compound binding; GO:1901363,heterocyclic compound binding; GO:0140110,t…	AP2 domain	AP2/ERF-ERF	TF	AP2/ERF->AP2/ERF-ERF
AP2/ERF-ERF	TF	AP2/ERF->AP2/ERF-ERF	Cluster-12176.0	0	0	0	0	0	0	1.44	2.96	2.8	0	0	0	0	0	0	21	55	61	NA	NA	NA	NA	6.53592	0.0254692	0.100353	false	-7.81203	9.33296e-09	1.09083e-07	down	7.5377	3.55651e-08	3.94781e-07	up	960	K09286 EREBP-like factor | (RefSeq) ethylene-responsive transcription factor 3-like (A)	hypothetical protein AQUCO_03700045v1 [Aquilegia coerulea]	EF122_ARATH RecName: Full=Ethylene-responsive transcription factor ERF122;	A0A022Q4J3_ERYGU SubName: Full=Uncharacterized protein {ECO:0000313|EMBL:EYU22534.1}; Flags: Fragment;	--	GO:0005634,nucleus; GO:0003677,DNA binding; GO:0003700,DNA-binding transcription factor activity; GO:0009873,ethylene-activated signaling pathway; GO:0006351,transcription, DNA-templated; GO:0003674,molecular_function; GO:0003676,nucleic acid binding; GO:0005488,binding; GO:0097159,organic cyclic compound binding; GO:1901363,heterocyclic compound binding; GO:0140110,transcription regulator activi…	AP2 domain	AP2/ERF-ERF	TF	AP2/ERF->AP2/ERF-ERF
AP2/ERF-ERF	TF	AP2/ERF->AP2/ERF-ERF	Cluster-22841.0	0.01	0	0	0.04	0.07	0.13	2.12	1.85	1.88	1	0	0	3	4	10	132	145	171	NA	NA	NA	NA	7.40646	2.27274e-05	0.000382616	up	-4.63958	2.12164e-22	9.90257e-21	down	8.34683	5.23699e-12	9.38662e-11	up	3215	K09286 EREBP-like factor | (RefSeq) ethylene-responsive transcription factor LEP (A)	ethylene-responsive transcription factor LEP [Amborella trichopoda]	ERF87_ARATH RecName: Full=Ethylene-responsive transcription factor ERF087;	W1PF40_AMBTC SubName: Full=Uncharacterized protein {ECO:0000313|EMBL:ERN06334.1};	--	GO:0005634,nucleus; GO:0003677,DNA binding; GO:0003700,DNA-binding transcription factor activity; GO:0009873,ethylene-activated signaling pathway; GO:0006351,transcription, DNA-templated; GO:0003674,molecular_function; GO:0003676,nucleic acid binding; GO:0005488,binding; GO:0097159,organic cyclic compound binding; GO:1901363,heterocyclic compound binding; GO:0140110,transcription regulator activi…	AP2 domain	AP2/ERF-ERF	TF	AP2/ERF->AP2/ERF-ERF
AP2/ERF-ERF	TF	AP2/ERF->AP2/ERF-ERF	Cluster-23826.0	0.17	0	0.68	0.85	0.48	0.86	2.7	3.33	3.44	5.11	0	12	23	9.65	22	55.52	87.12	105.04	NA	NA	NA	NA	2.72002	0.00565364	0.0341897	up	-2.09083	5.03257e-08	5.23289e-07	down	3.43026	0.000152276	0.00088658	up	1245	K09286 EREBP-like factor | (RefSeq) hypothetical protein (A)	PREDICTED: ethylene-responsive transcription factor ERF039-like [Oryza brachyantha]	TINY_ARATH RecName: Full=Ethylene-responsive transcription factor TINY;	A0A0E0DGS6_9ORYZ SubName: Full=Uncharacterized protein {ECO:0000313|EnsemblPlants:OMERI04G17260.1};	--	GO:0005634,nucleus; GO:0003677,DNA binding; GO:0003700,DNA-binding transcription factor activity; GO:0006351,transcription, DNA-templated; GO:0003674,molecular_function; GO:0003676,nucleic acid binding; GO:0005488,binding; GO:0097159,organic cyclic compound binding; GO:1901363,heterocyclic compound binding; GO:0140110,transcription regulator activity; GO:0008152,metabolic process; GO:0006139,nucl…	AP2 domain	AP2/ERF-ERF	TF	AP2/ERF->AP2/ERF-ERF
AP2/ERF-ERF	TF	AP2/ERF->AP2/ERF-ERF	Cluster-23826.1	0.21	0.7	0	0	0.53	0	3.58	7.52	5.93	5.89	12	0	0	10.35	0	71.48	190.88	175.96	NA	NA	NA	NA	3.20278	0.0871328	0.229686	false	-5.11508	5.7642e-05	0.000374285	down	4.17689	1.13761e-06	9.79111e-06	up	1216	K09286 EREBP-like factor | (RefSeq) hypothetical protein (A)	PREDICTED: ethylene-responsive transcription factor ERF039-like [Oryza brachyantha]	TINY_ARATH RecName: Full=Ethylene-responsive transcription factor TINY;	A0A0E0DGS6_9ORYZ SubName: Full=Uncharacterized protein {ECO:0000313|EnsemblPlants:OMERI04G17260.1};	--	GO:0005634,nucleus; GO:0003677,DNA binding; GO:0003700,DNA-binding transcription factor activity; GO:0006351,transcription, DNA-templated; GO:0003674,molecular_function; GO:0003676,nucleic acid binding; GO:0005488,binding; GO:0097159,organic cyclic compound binding; GO:1901363,heterocyclic compound binding; GO:0140110,transcription regulator activity; GO:0008152,metabolic process; GO:0006139,nucl…	AP2 domain	AP2/ERF-ERF	TF	AP2/ERF->AP2/ERF-ERF
AP2/ERF-ERF	TF	AP2/ERF->AP2/ERF-ERF	Cluster-27241.103975	0.34	1.44	1.22	0.95	1.53	0.77	7.22	11.21	10.22	2	5	4	5	6	4	28	58	64	NA	NA	NA	NA	2.40801	0.0244131	0.0973943	false	-3.18858	7.9647e-08	8.01679e-07	down	3.31802	2.5457e-06	2.06753e-05	up	453	K09286 EREBP-like factor | (RefSeq) ethylene-responsive transcription factor RAP2-4 (A)	unknown [Picea sitchensis]	ERF53_ARATH RecName: Full=Ethylene-responsive transcription factor ERF053 {ECO:0000305}; Short=AtERF53 {ECO:0000303|PubMed:22095047};	A9NNQ8_PICSI SubName: Full=Uncharacterized protein {ECO:0000313|EMBL:ABK22269.1};	--	GO:0005737,cytoplasm; GO:0005634,nucleus; GO:0003700,DNA-binding transcription factor activity; GO:0043565,sequence-specific DNA binding; GO:0009873,ethylene-activated signaling pathway; GO:1900036,positive regulation of cellular response to heat; GO:0045893,positive regulation of transcription, DNA-templated; GO:2000070,regulation of response to water deprivation; GO:0009651,response to salt str…	AP2 domain	AP2/ERF-ERF	TF	AP2/ERF->AP2/ERF-ERF
AP2/ERF-ERF	TF	AP2/ERF->AP2/ERF-ERF	Cluster-27241.109255	0.11	0.33	0.38	0.12	0.29	0.26	1.21	2.26	2.02	4	7	8	4	7	8	30	71	74	NA	NA	NA	NA	1.85557	0.0646566	0.188167	false	-3.05563	2.96712e-07	2.73641e-06	down	2.73252	2.44703e-05	0.000167899	up	NA	NA	NA	NA	NA	NA	NA	NA	NA	NA	NA
AP2/ERF-ERF	TF	AP2/ERF->AP2/ERF-ERF	Cluster-27241.109257	0.21	0.46	0	0.28	0.2	0.26	1.44	2.26	2.31	12.3	16	0	14.9	7.97	13.29	58.78	116.25	138.1	NA	NA	NA	NA	2.27065	0.0437228	0.144095	false	-3.01368	1.94705e-12	3.69479e-11	down	3.1054	0.000551166	0.00284197	up	NA	NA	NA	NA	NA	NA	NA	NA	NA	NA	NA
AP2/ERF-ERF	TF	AP2/ERF->AP2/ERF-ERF	Cluster-27241.111004	4.56	0	3.67	1.91	2.55	1.67	42.34	94.1	75.75	3	0	1	1	1	1	15	50	56	NA	NA	NA	NA	3.73902	0.0203849	0.0857713	false	-5.18481	1.17501e-06	9.98701e-06	down	4.61323	9.65653e-06	7.08735e-05	up	NA	NA	NA	NA	NA	NA	NA	NA	NA	NA	NA
AP2/ERF-ERF	TF	AP2/ERF->AP2/ERF-ERF	Cluster-27241.120281	0	0	0	0	0	0	23.65	36.61	39.44	0	0	0	0	0	0	629	1233	1549	NA	NA	NA	NA	24.453	1.07812e-12	9.1087e-11	up	-12.455	1.27542e-24	7.01164e-23	down	12.1818	1.07422e-23	5.25574e-22	up	NA	NA	NA	NA	NA	NA	NA	NA	NA	NA	NA
AP2/ERF-ERF	TF	AP2/ERF->AP2/ERF-ERF	Cluster-27241.120850	0.02	0	0.04	0.03	0	0	1.55	1.36	1.12	1	0	1	1	0	0	44	49	47	NA	NA	NA	NA	4.8647	0.018655	0.080685	false	-6.95329	5.49181e-08	5.6686e-07	down	5.84136	3.07575e-07	2.89219e-06	up	NA	NA	NA	NA	NA	NA	NA	NA	NA	NA	NA
AP2/ERF-ERF	TF	AP2/ERF->AP2/ERF-ERF	Cluster-27241.126982	0	0	0	0.02	0.06	0	1.07	1.34	1.23	0	0	0	1.25	2.33	0	45.76	72.39	76.92	NA	NA	NA	NA	7.10999	0.00101711	0.00889282	up	-5.91512	2.39076e-10	3.48708e-09	down	8.08663	1.64049e-10	2.49801e-09	up	NA	NA	NA	NA	NA	NA	NA	NA	NA	NA	NA
AP2/ERF-ERF	TF	AP2/ERF->AP2/ERF-ERF	Cluster-27241.30709	5.7	6.09	5.89	3.53	4.58	5.63	7.81	16.87	18.34	112	71	68	63	61	96	106	293	374	-0.426407	0.0877448	0.164635	false	0.622765	0.277324	0.485101	false	-1.65254	0.000123991	0.000754111	down	1.22704	0.00150748	0.00691119	up	914	K09286 EREBP-like factor | (RefSeq) ethylene-responsive transcription factor 3-like (A)	hypothetical protein 2_1437_01, partial [Pinus radiata]	ERF4_NICSY RecName: Full=Ethylene-responsive transcription factor 4; AltName: Full=Ethylene-responsive element-binding factor 3; Short=EREBP-3; AltName: Full=Ethylene-responsive element-binding factor 4 homolog; AltName: Full=NsERF3;	H9MAK4_PINRA SubName: Full=Uncharacterized protein {ECO:0000313|EMBL:AEW08150.1}; Flags: Fragment;	--	GO:0005634,nucleus; GO:0003677,DNA binding; GO:0003700,DNA-binding transcription factor activity; GO:0006952,defense response; GO:0009873,ethylene-activated signaling pathway; GO:0006351,transcription, DNA-templated; GO:0003674,molecular_function; GO:0003676,nucleic acid binding; GO:0005488,binding; GO:0097159,organic cyclic compound binding; GO:1901363,heterocyclic compound binding; GO:0140110,t…	AP2 domain	AP2/ERF-ERF	TF	AP2/ERF->AP2/ERF-ERF
AP2/ERF-ERF	TF	AP2/ERF->AP2/ERF-ERF	Cluster-27241.36706	1.45	1.64	1.42	2.48	2.31	3	24.18	35.48	33.21	58	39	34	91	63	104	679	1261	1376	0.727801	0.0038073	0.0110776	false	3.41623	0.000130743	0.00168594	up	-3.57906	1.86833e-48	2.92613e-46	down	4.30794	4.92539e-67	1.16199e-64	up	1598	K09286 EREBP-like factor | (RefSeq) dehydration-responsive element-binding protein 2B-like (A)	hypothetical protein PHYPA_021136 [Physcomitrella patens]	DRE2A_ARATH RecName: Full=Dehydration-responsive element-binding protein 2A; Short=Protein DREB2A;	B7FET9_9ROSI SubName: Full=Dehydration responsive element binding protein {ECO:0000313|EMBL:AAY35055.1};	--	GO:0005634,nucleus; GO:0003700,DNA-binding transcription factor activity; GO:0043565,sequence-specific DNA binding; GO:0044212,transcription regulatory region DNA binding; GO:0010286,heat acclimation; GO:0045893,positive regulation of transcription, DNA-templated; GO:0009408,response to heat; GO:0042542,response to hydrogen peroxide; GO:0010224,response to UV-B; GO:0009414,response to water depri…	AP2 domain	AP2/ERF-ERF	TF	AP2/ERF->AP2/ERF-ERF
AP2/ERF-ERF	TF	AP2/ERF->AP2/ERF-ERF	Cluster-27241.3731	0.79	0.42	0.21	0.54	0.55	0.53	6.79	12.77	13.62	19	6	3	12	9	11	114	273	341	NA	NA	NA	NA	3.55074	0.00183078	0.014272	up	-4.3696	6.48912e-22	2.88361e-20	down	4.42727	4.89633e-16	1.33531e-14	up	1065	K09286 EREBP-like factor | (RefSeq) ethylene-responsive transcription factor 9-like (A)	unknown [Picea sitchensis]	ERF82_ARATH RecName: Full=Ethylene-responsive transcription factor 3; Short=AtERF3; AltName: Full=Ethylene-responsive element-binding factor 3; Short=EREBP-3;	D5A9F4_PICSI SubName: Full=Uncharacterized protein {ECO:0000313|EMBL:ADE76173.1};	--	GO:0005634,nucleus; GO:0003700,DNA-binding transcription factor activity; GO:0043565,sequence-specific DNA binding; GO:0006952,defense response; GO:0009873,ethylene-activated signaling pathway; GO:0010105,negative regulation of ethylene-activated signaling pathway; GO:0006351,transcription, DNA-templated; GO:0140110,transcription regulator activity; GO:0003674,molecular_function; GO:0003676,nucle…	AP2 domain	AP2/ERF-ERF	TF	AP2/ERF->AP2/ERF-ERF
AP2/ERF-ERF	TF	AP2/ERF->AP2/ERF-ERF	Cluster-27241.38220	10.32	9.47	8.82	5.42	5.11	5.35	2.88	5	5.03	474	259	242	228	160	213	93	204	239	-0.924921	7.18471e-16	1.05485e-14	false	-1.06271	3.89407e-07	1.0512e-05	down	0.285886	0.320555	0.537399	false	-1.20559	8.37522e-06	6.21716e-05	down	1795	K09286 EREBP-like factor | (RefSeq) ethylene-responsive transcription factor RAP2-11-like (A)	ethylene-responsive transcription factor RAP2-11-like [Cucurbita moschata]	RA211_ARATH RecName: Full=Ethylene-responsive transcription factor RAP2-11; AltName: Full=Protein RELATED TO APETALA2 11;	D7TI77_VITVI SubName: Full=Uncharacterized protein {ECO:0000313|EMBL:CBI29953.3};	--	GO:0005634,nucleus; GO:0003700,DNA-binding transcription factor activity; GO:0043565,sequence-specific DNA binding; GO:0035865,cellular response to potassium ion; GO:0009873,ethylene-activated signaling pathway; GO:0048528,post-embryonic root development; GO:0009723,response to ethylene; GO:0000302,response to reactive oxygen species; GO:0006351,transcription, DNA-templated; GO:0140110,transcript…	AP2 domain	AP2/ERF-ERF	TF	AP2/ERF->AP2/ERF-ERF
AP2/ERF-ERF	TF	AP2/ERF->AP2/ERF-ERF	Cluster-27241.42660	2.56	3.49	2.03	1.34	2.54	0.91	0.34	1.04	0.56	34.71	28.04	16.04	16.51	23.31	10.76	3.2	12.43	7.91	-0.835588	0.0993351	0.181938	false	-1.35198	0.0303252	0.113023	false	NA	NA	NA	NA	-2.13226	0.00121549	0.00571478	down	711	K09286 EREBP-like factor | (RefSeq) ethylene-responsive transcription factor ERF023-like (A)	unknown [Picea sitchensis]	ERF17_ARATH RecName: Full=Ethylene-responsive transcription factor ERF017;	A9NK16_PICSI SubName: Full=Uncharacterized protein {ECO:0000313|EMBL:ABK20977.1};	--	GO:0005634,nucleus; GO:0003677,DNA binding; GO:0003700,DNA-binding transcription factor activity; GO:0009873,ethylene-activated signaling pathway; GO:0006351,transcription, DNA-templated; GO:0003674,molecular_function; GO:0003676,nucleic acid binding; GO:0005488,binding; GO:0097159,organic cyclic compound binding; GO:1901363,heterocyclic compound binding; GO:0140110,transcription regulator activi…	AP2 domain	AP2/ERF-ERF	TF	AP2/ERF->AP2/ERF-ERF
AP2/ERF-RAV	TF	AP2/ERF->AP2/ERF-RAV	Cluster-27241.46863	3.11	2.41	1.98	2.59	2.67	1.45	5.52	5.18	5.98	157.18	72.46	59.89	119.95	92.05	63.48	195.84	232.37	312.15	-0.248343	0.381693	0.520675	false	0.569007	0.225031	0.426813	false	-1.32733	3.81051e-06	2.98795e-05	down	1.07923	4.73561e-06	3.68285e-05	up	1948	K09287 RAV-like factor | (RefSeq) AP2/ERF and B3 domain-containing transcription repressor RAV2 (A)	hypothetical protein AMTR_s00007p00238950 [Amborella trichopoda]	Y1934_ORYSJ RecName: Full=AP2/ERF and B3 domain-containing protein Os01g0693400;	A0A0D6QRH4_ARACU SubName: Full=Uncharacterized protein {ECO:0000313|EMBL:JAG93772.1};	--	GO:0005634,nucleus; GO:0003677,DNA binding; GO:0003700,DNA-binding transcription factor activity; GO:0006351,transcription, DNA-templated; GO:0003674,molecular_function; GO:0003676,nucleic acid binding; GO:0005488,binding; GO:0097159,organic cyclic compound binding; GO:1901363,heterocyclic compound binding; GO:0140110,transcription regulator activity; GO:0008152,metabolic process; GO:0006139,nucl…	B3 DNA binding domain	AP2/ERF-RAV	TF	AP2/ERF->AP2/ERF-RAV
AP2/ERF-AP2	TF	AP2/ERF->AP2/ERF-AP2	Cluster-27241.78540	13.24	12.61	13.13	24.21	23.6	23.21	35.55	24.63	26.2	1446.21	820	862.94	2427.98	1760.24	2194.12	2743.68	2389.71	2952.03	0.791035	2.24789e-63	1.74286e-61	false	0.936138	9.23425e-10	4.48504e-08	false	-0.285754	0.0936436	0.227611	false	1.08227	2.23631e-09	2.93438e-08	up	NA	NA	NA	NA	NA	NA	NA	NA	NA	NA	NA
AP2/ERF-ERF	TF	AP2/ERF->AP2/ERF-ERF	Cluster-27241.83104	0.58	0.61	0.67	1.53	1.04	1.16	2.3	1.63	1.51	85.52	53.82	59.87	207.7	104.87	147.83	239.92	214.31	229.92	0.931878	1.62751e-05	7.50046e-05	false	1.21794	1.705e-05	0.000296672	up	-0.54448	0.046494	0.132514	false	1.4753	1.42256e-07	1.42281e-06	up	NA	NA	NA	NA	NA	NA	NA	NA	NA	NA	NA
AP2/ERF-RAV	TF	AP2/ERF->AP2/ERF-RAV	Cluster-27241.95146	0.15	0.09	0.04	0.17	0.17	0.05	0.84	1.41	1.67	8.82	3.35	1.37	9.2	6.83	2.82	34.94	74.17	102.13	NA	NA	NA	NA	2.93228	0.00858526	0.0463922	up	-3.3303	3.32531e-08	3.55057e-07	down	3.73581	5.94558e-08	6.34024e-07	up	NA	NA	NA	NA	NA	NA	NA	NA	NA	NA	NA
AP2/ERF-ERF	TF	AP2/ERF->AP2/ERF-ERF	Cluster-27241.9635	0.04	0.23	0.08	0	0	0.21	14.61	14.95	15.26	1	3	1	0	0	4	226	295	353	NA	NA	NA	NA	5.97104	0.00136008	0.0112559	up	-7.68267	3.42796e-24	1.83027e-22	down	7.11507	1.53052e-25	8.44827e-24	up	NA	NA	NA	NA	NA	NA	NA	NA	NA	NA	NA
AP2/ERF-ERF	TF	AP2/ERF->AP2/ERF-ERF	Cluster-27241.15977	0.95	0.63	1.88	0.75	1.2	0.89	1.47	2.69	2.77	29.07	11.47	34.22	20.97	25	23.54	31.4	73	87.97	-0.330392	0.52064	0.65044	false	0.452466	0.448743	0.647005	false	-1.29829	0.00508639	0.0208007	down	0.961511	0.0946745	0.211573	false	NA	NA	NA	NA	NA	NA	NA	NA	NA	NA	NA
AP2/ERF-ERF	TF	AP2/ERF->AP2/ERF-ERF	Cluster-27241.30710	2.32	1.54	1.36	2.08	1.26	1.48	3.02	4.35	3.76	38	15	13	31	14	21	34	63	64	-0.198837	0.667282	0.775311	false	0.53627	0.300246	0.509188	false	-1.20925	0.00343057	0.0148277	down	1.01286	0.0196976	0.0614049	false	805	K09286 EREBP-like factor | (RefSeq) ethylene-responsive transcription factor 9-like (A)	unknown [Picea sitchensis]	ERF80_ARATH RecName: Full=Ethylene-responsive transcription factor 9; Short=AtERF9; AltName: Full=Ethylene-responsive element-binding factor 9; Short=EREBP-9;	E0ZGY9_PICSI SubName: Full=Ethylene-responsive element binding factor-like protein {ECO:0000313|EMBL:ADM77614.1};	--	GO:0016020,membrane; GO:0005634,nucleus; GO:0003700,DNA-binding transcription factor activity; GO:0043565,sequence-specific DNA binding; GO:0006952,defense response; GO:0009873,ethylene-activated signaling pathway; GO:0019760,glucosinolate metabolic process; GO:0006351,transcription, DNA-templated; GO:0140110,transcription regulator activity; GO:0003674,molecular_function; GO:0003676,nucleic acid…	--	AP2/ERF-ERF	TF	AP2/ERF->AP2/ERF-ERF
MYB	TF	MYB->MYB	Cluster-27241.106139	3.01	3.18	3.15	8.97	8.49	8.47	4.78	4.95	4.32	196	123	123	535	377	477	219	286	290	1.40759	2.34646e-37	1.01149e-35	up	1.01865	0.000614808	0.00601163	up	0.880717	1.0096e-10	1.55428e-09	false	0.525965	0.00260046	0.0110936	false	NA	NA	NA	NA	NA	NA	NA	NA	NA	NA	NA
MYB	TF	MYB->MYB	Cluster-27241.55044	2.16	2.46	4.19	0.81	0.9	1.84	1.21	0.92	2.13	29.78	20.06	33.54	10.14	8.34	22.06	11.43	11.18	30.66	-1.37627	0.0116424	0.0297017	down	-1.23937	0.0142877	0.0667408	false	NA	NA	NA	NA	-1.10586	0.066692	0.161919	false	718	K09422 transcription factor MYB, plant | (RefSeq) transcription factor TT2-like (A)	unknown [Picea sitchensis]	MYB3_ARATH RecName: Full=Transcription factor MYB3; AltName: Full=Myb-related protein 3; Short=AtMYB3;	B8LMJ6_PICSI SubName: Full=Uncharacterized protein {ECO:0000313|EMBL:ABR16876.1};	Transcription factor, Myb superfamily	GO:0005634,nucleus; GO:0003700,DNA-binding transcription factor activity; GO:0000981,DNA-binding transcription factor activity, RNA polymerase II-specific; GO:0043565,sequence-specific DNA binding; GO:0001135,RNA polymerase II transcription regulator recruiting activity; GO:0044212,transcription regulatory region DNA binding; GO:0030154,cell differentiation; GO:0009800,cinnamic acid biosynthetic …	Myb-like DNA-binding domain	MYB	TF	MYB->MYB
MYB	TF	MYB->MYB	Cluster-27241.67931	18.17	16.04	17.71	8.73	8.82	8.02	8.28	7.58	7.18	831.66	436.86	484.28	365.89	275.02	318.14	266.19	307.68	339.66	-1.09958	5.12943e-35	2.04706e-33	down	-1.17566	1.40916e-33	8.83949e-31	down	0.146914	0.288251	0.502159	false	-1.23999	1.10507e-19	4.04924e-18	down	NA	NA	NA	NA	NA	NA	NA	NA	NA	NA	NA
MYB	TF	MYB->MYB	Cluster-27241.68484	50.75	50.54	46.63	18.4	18.74	17.27	14.92	26.77	23.55	223	130	110	71	54	66.71	42	102.02	110.04	-1.49536	9.1567e-16	1.33153e-14	down	-1.34645	5.66657e-08	1.86417e-06	down	-0.279686	0.437222	0.648663	false	-1.20933	0.000166446	0.000960472	down	NA	NA	NA	NA	NA	NA	NA	NA	NA	NA	NA
MYB	TF	MYB->MYB	Cluster-27241.70901	24.23	31.87	26.9	10.48	10.81	6.89	8.23	15.08	19.42	125.56	96.89	76.02	47.98	36.96	31.32	27.65	68.04	106.61	-1.62223	4.09721e-10	3.51536e-09	down	-1.2653	0.000977513	0.00861785	down	-0.64685	0.179178	0.366798	false	-0.975155	0.0199059	0.0619255	false	NA	NA	NA	NA	NA	NA	NA	NA	NA	NA	NA
MYB	TF	MYB->MYB	Cluster-27241.70902	42.23	39.57	42.5	20.54	17.51	17.85	24.47	25.31	31.45	914.94	509.01	542.96	405.33	257.33	335.74	367.55	485.33	707.06	-1.21951	6.16601e-46	3.43049e-44	down	-0.928671	9.77441e-06	0.000183258	false	-0.545793	0.00149241	0.00713251	false	-0.673834	9.19372e-06	6.778e-05	false	NA	NA	NA	NA	NA	NA	NA	NA	NA	NA	NA
MYB	TF	MYB->MYB	Cluster-27241.72183	2.1	4.05	4.02	1.03	2.18	1.97	0.66	2.19	1.19	69.16	79.33	78.75	30.86	48.72	56.16	15.12	63.98	40.61	-1.03882	0.00711343	0.0192891	down	-1.20642	0.010316	0.0529498	false	0.34046	0.580241	0.762229	false	-1.38106	0.0153007	0.0498409	down	NA	NA	NA	NA	NA	NA	NA	NA	NA	NA	NA
MYB	TF	MYB->MYB	Cluster-27241.101697	0.08	0	0	0.29	0	0	1.38	2.06	1.72	1.75	0	0	5.68	0	0	20.43	38.85	38.17	NA	NA	NA	NA	4.58065	0.0278429	0.106618	false	-4.02133	0.000726033	0.00375839	down	5.33526	1.67928e-05	0.00011843	up	971	K09422 transcription factor MYB, plant | (RefSeq) myb-related protein 308-like (A)	unknown [Picea sitchensis]	MYB4_ARATH RecName: Full=Transcription repressor MYB4; AltName: Full=Myb-related protein 4; Short=AtMYB4;	A9NY74_PICSI SubName: Full=Uncharacterized protein {ECO:0000313|EMBL:ABK25585.1};	Transcription factor, Myb superfamily	GO:0005634,nucleus; GO:0003677,DNA binding; GO:0003700,DNA-binding transcription factor activity; GO:0000981,DNA-binding transcription factor activity, RNA polymerase II-specific; GO:0043565,sequence-specific DNA binding; GO:0001135,RNA polymerase II transcription regulator recruiting activity; GO:0044212,transcription regulatory region DNA binding; GO:0030154,cell differentiation; GO:1903086,neg…	Myb-like DNA-binding domain	MYB	TF	MYB->MYB
MYB	TF	MYB->MYB	Cluster-27241.101698	23.62	26.18	25.34	21.53	20.72	20.7	53.65	96.99	88.73	507.44	334	320.93	421.41	302	386	799.1	1844.52	1978.58	-0.317213	0.000781918	0.00267417	false	0.945265	0.0935747	0.241053	false	-1.93719	3.86975e-13	8.0027e-12	down	1.61337	8.12844e-10	1.12125e-08	up	976	K09422 transcription factor MYB, plant | (RefSeq) myb-related protein 308 (A)	R2R3-MYB transcription factor MYB13 [Picea glauca]	MYB08_ANTMA RecName: Full=Myb-related protein 308;	A5JYF7_PICGL SubName: Full=R2R3-MYB transcription factor MYB13 {ECO:0000313|EMBL:ABQ51229.1};	Transcription factor, Myb superfamily	GO:0005634,nucleus; GO:0003677,DNA binding; GO:0006355,regulation of transcription, DNA-templated; GO:0006351,transcription, DNA-templated; GO:0003674,molecular_function; GO:0003676,nucleic acid binding; GO:0005488,binding; GO:0097159,organic cyclic compound binding; GO:1901363,heterocyclic compound binding; GO:0008152,metabolic process; GO:0006139,nucleobase-containing compound metabolic process…	Myb-like DNA-binding domain	MYB	TF	MYB->MYB
MYB	TF	MYB->MYB	Cluster-27241.119522	0.61	0.76	0	0.2	0.92	0	7.35	8.46	8.27	28.31	21	0	8.45	29	0	239.84	348.52	396.9	-0.384491	0.799935	0.87253	false	3.14776	0.047041	0.151723	false	-4.47639	1.15342e-05	8.4117e-05	down	4.0779	5.27456e-07	4.78853e-06	up	NA	NA	NA	NA	NA	NA	NA	NA	NA	NA	NA
MYB	TF	MYB->MYB	Cluster-27241.119523	0.11	0	0.67	0.76	0	0.9	3.97	4.23	3.9	4.69	0	17	29.55	0	33	118.16	159.48	171.1	1.01502	0.503741	0.636328	false	3.05303	0.0314536	0.115763	false	-2.84842	0.00340295	0.0147317	down	3.88649	4.5265e-05	0.000293894	up	NA	NA	NA	NA	NA	NA	NA	NA	NA	NA	NA
MYB	TF	MYB->MYB	Cluster-27241.121891	0	0	0	0	0	0.08	6.61	8.01	7.55	0	0	0	0	0	1	62	97	108	NA	NA	NA	NA	7.53966	0.00262328	0.0189241	up	-7.84685	2.25169e-10	3.30063e-09	down	8.53665	6.94676e-12	1.22654e-10	up	NA	NA	NA	NA	NA	NA	NA	NA	NA	NA	NA
MYB	TF	MYB->MYB	Cluster-27241.128776	0	0	0	0	0.04	0	1.24	1.49	1.7	0	0	0	0	1	0	30.77	46.88	62.15	NA	NA	NA	NA	6.60341	0.00780177	0.0432834	up	-6.90402	7.25112e-08	7.35316e-07	down	7.59325	5.46596e-09	6.78694e-08	up	NA	NA	NA	NA	NA	NA	NA	NA	NA	NA	NA
MYB	TF	MYB->MYB	Cluster-27241.13821	0.2	0.23	0.28	0.12	0.33	0.1	2.03	2.24	2.7	7	5	6	4	8	3	51	71	100	NA	NA	NA	NA	2.3386	0.0319712	0.117027	false	-3.7406	7.19855e-11	1.12492e-09	down	3.26249	5.21886e-11	8.45524e-10	up	NA	NA	NA	NA	NA	NA	NA	NA	NA	NA	NA
MYB	TF	MYB->MYB	Cluster-27241.16089	0	0.14	0	0	0	0	5.23	4.94	3.99	0	2	0	0	0	0	87.18	104.94	99.35	NA	NA	NA	NA	5.62637	0.0290797	0.109966	false	-8.96587	4.27787e-13	8.78485e-12	down	6.86158	3.26308e-10	4.7929e-09	up	NA	NA	NA	NA	NA	NA	NA	NA	NA	NA	NA
MYB	TF	MYB->MYB	Cluster-27241.24706	0.45	0.08	0.26	0.42	0.24	0.54	1.38	2.41	2.03	9	1	3	7.52	3.28	9.25	19	42.46	42	NA	NA	NA	NA	2.03947	0.0322884	0.117784	false	-2.27769	0.000221432	0.00128108	down	2.73643	0.000270855	0.00149855	up	922	K09422 transcription factor MYB, plant | (RefSeq) transcription factor MYB1 (A)	transcription factor MYB30 [Picea abies]	MYB3_ARATH RecName: Full=Transcription factor MYB3; AltName: Full=Myb-related protein 3; Short=AtMYB3;	A0A167V901_PICAB SubName: Full=Transcription factor MYB30 {ECO:0000313|EMBL:ANB66413.1};	Transcription factor, Myb superfamily	GO:0005634,nucleus; GO:0003700,DNA-binding transcription factor activity; GO:0000981,DNA-binding transcription factor activity, RNA polymerase II-specific; GO:0043565,sequence-specific DNA binding; GO:0001135,RNA polymerase II transcription regulator recruiting activity; GO:0044212,transcription regulatory region DNA binding; GO:0030154,cell differentiation; GO:0009800,cinnamic acid biosynthetic …	Myb-like DNA-binding domain	MYB	TF	MYB->MYB
MYB	TF	MYB->MYB	Cluster-27241.27951	0.16	0.15	0	0.33	0.93	0.54	101.1	166.15	167.82	3.71	2	0	6.68	14.23	10.56	1580.77	3314.26	3922.98	NA	NA	NA	NA	9.30539	1.08289e-06	2.61093e-05	up	-7.94824	3.62072e-87	1.55598e-84	down	10.1778	1.18911e-53	1.91391e-51	up	1011	K09422 transcription factor MYB, plant | (RefSeq) transcription repressor MYB6-like (A)	transcription factor MYB29 [Picea abies]	MYBC_MAIZE RecName: Full=Anthocyanin regulatory C1 protein;	A0A167V8X0_PICAB SubName: Full=Transcription factor MYB29 {ECO:0000313|EMBL:ANB66412.1};	Transcription factor, Myb superfamily	GO:0005634,nucleus; GO:0003677,DNA binding; GO:0006355,regulation of transcription, DNA-templated; GO:0006351,transcription, DNA-templated; GO:0003674,molecular_function; GO:0003676,nucleic acid binding; GO:0005488,binding; GO:0097159,organic cyclic compound binding; GO:1901363,heterocyclic compound binding; GO:0008152,metabolic process; GO:0006139,nucleobase-containing compound metabolic process…	Myb-like DNA-binding domain	MYB	TF	MYB->MYB
MYB	TF	MYB->MYB	Cluster-27241.38058	0.46	0.54	0.61	0.88	1.15	1.07	2	1.95	2.1	23	16	18	40	39	46	70	86	108	0.8859	0.0157157	0.0385407	false	1.44567	0.000610376	0.00597461	up	-0.977593	0.000499873	0.00268481	false	1.86654	3.36997e-08	3.76257e-07	up	1922	K09422 transcription factor MYB, plant | (RefSeq) myb-related protein 305-like (A)	PREDICTED: myb-related protein 305-like [Musa acuminata subsp. malaccensis]	MYB2_ORYSJ RecName: Full=Transcription factor MYB2 {ECO:0000305}; AltName: Full=Myb-related protein 2 {ECO:0000305}; Short=OsMYB2 {ECO:0000303|PubMed:22301384};	A0A0D6QR05_ARACU SubName: Full=Uncharacterized protein {ECO:0000313|EMBL:JAG92927.1};	Transcription factor, Myb superfamily	GO:0005634,nucleus; GO:0000981,DNA-binding transcription factor activity, RNA polymerase II-specific; GO:0043565,sequence-specific DNA binding; GO:0001135,RNA polymerase II transcription regulator recruiting activity; GO:0044212,transcription regulatory region DNA binding; GO:0030154,cell differentiation; GO:1901002,positive regulation of response to salt stress; GO:1902584,positive regulation of…	Myb-like DNA-binding domain	MYB	TF	MYB->MYB
MYB	TF	MYB->MYB	Cluster-27241.55043	15.82	14.45	14.75	10.16	10.33	8.88	7.47	7.13	8.38	293.22	158.94	160.46	171.24	129.66	142.94	95.57	116.82	161.34	-0.689921	4.94818e-07	2.85126e-06	false	-0.855915	6.18765e-08	2.01412e-06	false	0.344587	0.0755372	0.193308	false	-1.02811	1.19473e-08	1.42343e-07	down	877	K09422 transcription factor MYB, plant | (RefSeq) transcription factor MYB8-like (A)	unknown [Picea sitchensis]	MYB12_ARATH RecName: Full=Transcription factor MYB12 {ECO:0000303|PubMed:9839469}; AltName: Full=Myb-related protein 12 {ECO:0000303|PubMed:9839469}; Short=AtMYB12 {ECO:0000303|PubMed:9839469}; AltName: Full=Protein PRODUCTION OF FLAVONOL GLYCOSIDES 1 {ECO:0000303|PubMed:17419845};	B8LMJ6_PICSI SubName: Full=Uncharacterized protein {ECO:0000313|EMBL:ABR16876.1};	Transcription factor, Myb superfamily	GO:0005634,nucleus; GO:0003700,DNA-binding transcription factor activity; GO:0000981,DNA-binding transcription factor activity, RNA polymerase II-specific; GO:0043565,sequence-specific DNA binding; GO:0001135,RNA polymerase II transcription regulator recruiting activity; GO:0044212,transcription regulatory region DNA binding; GO:0030154,cell differentiation; GO:0009813,flavonoid biosynthetic proc…	Myb-like DNA-binding domain	MYB	TF	MYB->MYB
MYB	TF	MYB->MYB	Cluster-27241.55046	0.58	0.58	0.93	0.52	1.84	1.46	2.18	4.43	4.22	27.72	16.4	26.26	22.81	59.63	60.09	72.71	186.65	206.89	0.824762	0.10644	0.192669	false	1.76156	0.00609245	0.0360361	up	-1.50448	0.00732692	0.0284166	down	2.33509	1.4037e-07	1.40591e-06	up	1845	K09422 transcription factor MYB, plant | (RefSeq) myb-related protein 306 (A)	MYB1 protein [Paeonia suffruticosa]	MYB06_ANTMA RecName: Full=Myb-related protein 306;	A0A0D6R8Q9_ARACU SubName: Full=Uncharacterized protein {ECO:0000313|EMBL:JAG98305.1};	Transcription factor, Myb superfamily	GO:0005634,nucleus; GO:0003677,DNA binding; GO:0006355,regulation of transcription, DNA-templated; GO:0006351,transcription, DNA-templated; GO:0003674,molecular_function; GO:0003676,nucleic acid binding; GO:0005488,binding; GO:0097159,organic cyclic compound binding; GO:1901363,heterocyclic compound binding; GO:0008152,metabolic process; GO:0006139,nucleobase-containing compound metabolic process…	Myb-like DNA-binding domain	MYB	TF	MYB->MYB
MYB	TF	MYB->MYB	Cluster-27241.6173	0.06	0	0.18	0.44	0.24	0.42	7.47	5.7	6.95	1.55	0	3	11	4.41	10.07	143	138.89	198.07	NA	NA	NA	NA	5.30887	7.86368e-05	0.00109907	up	-4.1962	1.39981e-25	8.15337e-24	down	6.26717	3.33667e-18	1.1019e-16	up	1177	K09422 transcription factor MYB, plant | (RefSeq) anthocyanin regulatory C1 protein-like (A)	transcription factor MYB29 [Picea abies]	MYBC_MAIZE RecName: Full=Anthocyanin regulatory C1 protein;	A0A167V8X0_PICAB SubName: Full=Transcription factor MYB29 {ECO:0000313|EMBL:ANB66412.1};	Transcription factor, Myb superfamily	GO:0005634,nucleus; GO:0003677,DNA binding; GO:0006355,regulation of transcription, DNA-templated; GO:0006351,transcription, DNA-templated; GO:0003674,molecular_function; GO:0003676,nucleic acid binding; GO:0005488,binding; GO:0097159,organic cyclic compound binding; GO:1901363,heterocyclic compound binding; GO:0008152,metabolic process; GO:0006139,nucleobase-containing compound metabolic process…	Myb-like DNA-binding domain	MYB	TF	MYB->MYB
MYB	TF	MYB->MYB	Cluster-27241.69693	8.71	8.78	9.09	15.7	14.13	13.03	50.27	68.2	69.69	347	208	216	572	383.27	449.82	1403	2409	2870	0.620038	1.16663e-09	9.52478e-09	false	2.05034	0.000557598	0.0055475	up	-2.14275	8.78431e-31	6.68575e-29	down	2.76047	3.6165e-52	5.56102e-50	up	NA	NA	NA	NA	NA	NA	NA	NA	NA	NA	NA
MYB	TF	MYB->MYB	Cluster-27241.72202	20.69	32	34.08	15.57	22.89	21.89	6.66	14.1	12.64	74	66.77	64.01	48.48	53.21	69	15	43.47	48.29	-0.547424	0.0668699	0.131344	false	-0.920164	0.0287162	0.109004	false	0.834388	0.0783365	0.198984	false	-1.38562	0.0021844	0.00953485	down	NA	NA	NA	NA	NA	NA	NA	NA	NA	NA	NA
MYB	TF	MYB->MYB	Cluster-27241.74442	4.99	6.21	5.39	4.84	4.83	4.25	13.13	14.2	14.98	301	223	195	268	199	222	558	761	934	-0.319564	0.016947	0.0411287	false	0.689565	0.153052	0.334147	false	-1.61251	8.13797e-33	6.76353e-31	down	1.29212	1.58577e-16	4.50661e-15	up	NA	NA	NA	NA	NA	NA	NA	NA	NA	NA	NA
MYB	TF	MYB->MYB	Cluster-27241.77362	8.54	9.76	12.73	7.54	7.64	12.52	12.02	33.66	22.8	412	280	367	333	251	523	407	1440	1136	-0.228833	0.312081	0.446597	false	0.564958	0.258153	0.464136	false	-1.31098	0.0023501	0.0106679	down	1.07849	0.00672887	0.0251213	up	NA	NA	NA	NA	NA	NA	NA	NA	NA	NA	NA
MYB	TF	MYB->MYB	Cluster-27241.81460	0.47	0.8	0.87	1.6	3.21	3.19	5.48	14.01	9.22	2	2	2	6	9	12	15	52	42	NA	NA	NA	NA	3.12426	0.00113506	0.009731	up	-1.86371	0.00551053	0.022292	down	3.78637	1.7542e-05	0.000123335	up	NA	NA	NA	NA	NA	NA	NA	NA	NA	NA	NA
MYB	TF	MYB->MYB	Cluster-27241.88360	3.17	2.44	3.53	1.78	2.25	1.76	1.07	1.61	1.45	188.95	86.31	125.89	96.93	91.31	90.71	44.94	85.21	88.89	-0.741243	0.000423076	0.0015227	false	-0.960629	0.000188336	0.00228245	false	0.469043	0.112884	0.261911	false	-1.20486	5.02335e-05	0.000323168	down	NA	NA	NA	NA	NA	NA	NA	NA	NA	NA	NA
MYB	TF	MYB->MYB	Cluster-27241.110462	1.4	1.8	1.41	1.49	1.03	1.35	3.3	2.7	2.46	99	76	60	97	50	83	165	170	180	-0.307063	0.197691	0.315133	false	0.348741	0.394104	0.600609	false	-1.1209	1.65375e-05	0.000117921	down	0.814741	0.00163278	0.00740192	false	NA	NA	NA	NA	NA	NA	NA	NA	NA	NA	NA
Tify	TF	Tify	Cluster-27241.124188	4.43	4.4	4.31	2.08	1.83	1.89	21.45	29.64	31.75	109.56	64.71	63.09	46.91	30.73	40.67	369.06	649.51	814.51	-1.24062	2.34837e-07	1.40753e-06	down	1.6882	0.0724501	0.203289	false	-3.83313	4.73621e-47	7.13245e-45	down	2.59344	3.14718e-28	2.00743e-26	up	NA	NA	NA	NA	NA	NA	NA	NA	NA	NA	NA
Tify	TF	Tify	Cluster-27241.32747	3.91	4.49	4.34	1.12	0.85	0.75	1.4	2.18	2.13	133.77	91.26	88.22	34.96	19.8	22.11	33.41	66.21	75.36	-2.28628	4.67968e-18	8.13947e-17	down	-1.66324	4.0973e-05	0.000636613	down	-1.0748	0.00811469	0.0310752	down	-1.21412	4.33297e-05	0.000282447	down	1401	K13464 jasmonate ZIM domain-containing protein | (RefSeq) protein TIFY 10b-like (A)	unknown [Picea sitchensis]	TI10B_ORYSJ RecName: Full=Protein TIFY 10b {ECO:0000305}; Short=OsTIFY10b {ECO:0000303|PubMed:19618278}; AltName: Full=Jasmonate ZIM domain-containing protein 7 {ECO:0000305}; Short=OsJAZ7 {ECO:0000303|PubMed:19618278}; AltName: Full=OsJAZ6 {ECO:0000303|PubMed:21332845};	D5ADR6_PICSI SubName: Full=Uncharacterized protein {ECO:0000313|EMBL:ADE77685.1};	--	GO:0005634,nucleus; GO:0003714,transcription corepressor activity; GO:1903507,negative regulation of nucleic acid-templated transcription; GO:0031347,regulation of defense response; GO:2000022,regulation of jasmonic acid mediated signaling pathway; GO:0006355,regulation of transcription, DNA-templated; GO:0009611,response to wounding; GO:0006351,transcription, DNA-templated; GO:0140110,transcript…	tify domain	Tify	TF	Tify
Tify	TF	Tify	Cluster-27241.51133	6.69	6.11	8.6	2.68	2.67	2.2	1.13	1.3	1.84	221	120	169	81	60	63	26	38	63	-1.57468	1.89087e-14	2.47074e-13	down	-1.93407	2.23629e-09	1.01428e-07	down	0.804011	0.0177773	0.0603462	false	-2.37793	5.78293e-14	1.2679e-12	down	1363	K13464 jasmonate ZIM domain-containing protein | (RefSeq) protein TIFY 10A-like (A)	unknown [Picea sitchensis]	TI10B_ORYSJ RecName: Full=Protein TIFY 10b {ECO:0000305}; Short=OsTIFY10b {ECO:0000303|PubMed:19618278}; AltName: Full=Jasmonate ZIM domain-containing protein 7 {ECO:0000305}; Short=OsJAZ7 {ECO:0000303|PubMed:19618278}; AltName: Full=OsJAZ6 {ECO:0000303|PubMed:21332845};	D5ADR6_PICSI SubName: Full=Uncharacterized protein {ECO:0000313|EMBL:ADE77685.1};	--	GO:0005634,nucleus; GO:0003714,transcription corepressor activity; GO:1903507,negative regulation of nucleic acid-templated transcription; GO:0031347,regulation of defense response; GO:2000022,regulation of jasmonic acid mediated signaling pathway; GO:0006355,regulation of transcription, DNA-templated; GO:0009611,response to wounding; GO:0006351,transcription, DNA-templated; GO:0140110,transcript…	tify domain	Tify	TF	Tify
Tify	TF	Tify	Cluster-27241.67212	9.68	7.46	5.85	2.08	2.09	1.63	14.91	20.36	23.09	164	75	58	32	24	24	174	305	407	-2.07122	5.6836e-12	5.97863e-11	down	0.42052	0.631953	0.786409	false	-3.34534	3.68142e-26	2.20628e-24	down	1.27943	2.56847e-05	0.000175428	up	NA	NA	NA	NA	NA	NA	NA	NA	NA	NA	NA
Tify	TF	Tify	Cluster-27241.10625	0.31	0	0.21	0.21	0.09	0.29	3.9	5.22	5.45	5	0	2	3	1	4	43	74	91	0.306115	0.0925369	0.172035	false	3.75651	0.00867214	0.0466777	up	-4.59955	3.78521e-12	6.94002e-11	down	4.60058	4.19333e-10	6.05597e-09	up	NA	NA	NA	NA	NA	NA	NA	NA	NA	NA	NA
Tify	TF	Tify	Cluster-27241.122096	0.15	0	0.33	0	0	0	9.06	12	15.26	2.29	0	3	0	0	0	97.06	165.42	247.78	NA	NA	NA	NA	5.26032	0.019628	0.0836712	false	-9.70921	6.22499e-15	1.54263e-13	down	6.2986	1.30612e-16	3.74899e-15	up	NA	NA	NA	NA	NA	NA	NA	NA	NA	NA	NA
Tify	TF	Tify	Cluster-27241.122558	0	0	0	0	0	0.23	4.74	5.66	4.99	0	0	0	0	0	5.44	88.9	134.94	139.24	NA	NA	NA	NA	8.00677	0.000849707	0.0077343	up	-6.09651	1.11289e-14	2.66602e-13	down	8.98866	2.50426e-13	5.18058e-12	up	NA	NA	NA	NA	NA	NA	NA	NA	NA	NA	NA
Tify	TF	Tify	Cluster-27241.122559	0.27	0.21	0.19	0.32	0.11	0.44	3.05	4.2	4.79	7.65	3.46	3.25	8.3	2.09	10.9	60.32	105.49	140.68	NA	NA	NA	NA	3.26043	0.0040333	0.0264528	up	-3.77089	4.83292e-12	8.74267e-11	down	4.12254	5.86965e-14	1.28528e-12	up	NA	NA	NA	NA	NA	NA	NA	NA	NA	NA	NA
Tify	TF	Tify	Cluster-27241.122561	0	0	0	0.16	0	0	1.24	1.81	2.31	0	0	0	3.35	0	0	20.14	37.3	55.89	NA	NA	NA	NA	6.29016	0.00813489	0.0447159	up	-5.14761	3.44367e-06	2.71844e-05	down	7.25679	1.16289e-07	1.18329e-06	up	NA	NA	NA	NA	NA	NA	NA	NA	NA	NA	NA
Tify	TF	Tify	Cluster-27241.12347	0.11	0	0	0.11	0	0.13	3.79	4.57	3.11	3	0	0	2.65	0	3.09	69.73	106.88	85.19	NA	NA	NA	NA	5.48713	0.00347088	0.0235356	up	-5.39841	9.3948e-14	2.06399e-12	down	6.20151	1.39363e-10	2.13627e-09	up	NA	NA	NA	NA	NA	NA	NA	NA	NA	NA	NA
Tify	TF	Tify	Cluster-27241.128792	0.94	1.27	0.79	1.03	0.92	0.72	4.26	3.46	4.18	30	24	15	30	20	20	95	98	138	-0.232913	0.576039	0.699196	false	1.21302	0.0794512	0.21634	false	-2.15926	3.65609e-12	6.70676e-11	down	1.93286	7.21569e-09	8.79466e-08	up	NA	NA	NA	NA	NA	NA	NA	NA	NA	NA	NA
Tify	TF	Tify	Cluster-27241.13559	0.04	0	0.21	0	0	0	2.74	4.25	5	1	0	3	0	0	0.09	45.45	89.76	123.67	NA	NA	NA	NA	4.50862	0.0463251	0.15021	false	-8.72891	1.10451e-11	1.91545e-10	down	5.61031	3.56715e-10	5.20402e-09	up	NA	NA	NA	NA	NA	NA	NA	NA	NA	NA	NA
Tify	TF	Tify	Cluster-27241.14409	0	0.08	0.21	0.14	0	0.05	4.31	5.24	4.81	0	1	2.6	2.75	0	1	64.06	99.31	106.88	NA	NA	NA	NA	4.50446	0.0109608	0.0552444	false	-5.99901	2.09621e-13	4.45526e-12	down	5.69018	9.15308e-12	1.60279e-10	up	NA	NA	NA	NA	NA	NA	NA	NA	NA	NA	NA
Tify	TF	Tify	Cluster-27241.14413	0	0	0	0.37	0	0	11.8	11.18	10.74	0	0	0	1	0	0	23	30	36	NA	NA	NA	NA	5.97285	0.0152166	0.0696989	false	-6.26946	1.83857e-06	1.51271e-05	down	6.96003	2.53973e-07	2.42524e-06	up	NA	NA	NA	NA	NA	NA	NA	NA	NA	NA	NA
Tify	TF	Tify	Cluster-27241.14415	0.19	0.33	0.36	0	0	0.44	10.18	12.26	16.85	1	1	1	0	0	2	34	55	92	NA	NA	NA	NA	4.48706	0.0141428	0.0662397	false	-6.36717	4.63899e-08	4.84941e-07	down	5.52899	1.60279e-08	1.87522e-07	up	NA	NA	NA	NA	NA	NA	NA	NA	NA	NA	NA
Tify	TF	Tify	Cluster-27241.25701	6.27	4.58	5.05	4.4	2.33	4.15	16.43	30.02	29.43	126.68	54.92	60	81	31.85	72.75	229.68	536.7	617.27	-0.610176	0.0361357	0.0785796	false	1.38716	0.0785525	0.214635	false	-2.80254	1.87208e-13	4.00549e-12	down	2.19097	1.73854e-11	2.95861e-10	up	933	K13464 jasmonate ZIM domain-containing protein | (RefSeq) protein TIFY 10a (A)	unknown [Picea sitchensis]	TI10A_ORYSJ RecName: Full=Protein TIFY 10a {ECO:0000305}; Short=OsTIFY10a {ECO:0000303|PubMed:19618278}; AltName: Full=Jasmonate ZIM domain-containing protein 6 {ECO:0000305}; Short=OsJAZ6 {ECO:0000303|PubMed:19618278}; AltName: Full=OsJAZ5 {ECO:0000303|PubMed:23320078};	A9P132_PICSI SubName: Full=Uncharacterized protein {ECO:0000313|EMBL:ABK26593.1};	--	GO:0005634,nucleus; GO:0003714,transcription corepressor activity; GO:1903507,negative regulation of nucleic acid-templated transcription; GO:0031347,regulation of defense response; GO:2000022,regulation of jasmonic acid mediated signaling pathway; GO:0006355,regulation of transcription, DNA-templated; GO:0009611,response to wounding; GO:0006351,transcription, DNA-templated; GO:0140110,transcript…	tify domain	Tify	TF	Tify
Tify	TF	Tify	Cluster-27241.2582	0.61	0.43	0.65	0.15	0.05	0.32	1.67	2.52	2.68	17.27	7.26	11	4	1	8	33.09	63.32	78.68	0.146604	0.340954	0.477857	false	1.08657	0.317998	0.527143	false	-3.65311	7.57107e-08	7.65778e-07	down	1.97785	3.49748e-05	0.000232428	up	1207	K13464 jasmonate ZIM domain-containing protein | (RefSeq) protein TIFY 10B (A)	unknown [Picea sitchensis]	TI10B_ORYSJ RecName: Full=Protein TIFY 10b {ECO:0000305}; Short=OsTIFY10b {ECO:0000303|PubMed:19618278}; AltName: Full=Jasmonate ZIM domain-containing protein 7 {ECO:0000305}; Short=OsJAZ7 {ECO:0000303|PubMed:19618278}; AltName: Full=OsJAZ6 {ECO:0000303|PubMed:21332845};	A9NQ92_PICSI SubName: Full=Uncharacterized protein {ECO:0000313|EMBL:ABK22803.1};	--	GO:0005634,nucleus; GO:0003714,transcription corepressor activity; GO:1903507,negative regulation of nucleic acid-templated transcription; GO:0031347,regulation of defense response; GO:2000022,regulation of jasmonic acid mediated signaling pathway; GO:0006355,regulation of transcription, DNA-templated; GO:0009611,response to wounding; GO:0006351,transcription, DNA-templated; GO:0140110,transcript…	tify domain	Tify	TF	Tify
Tify	TF	Tify	Cluster-27241.25835	1.08	0.88	0.44	1.49	1.2	1.26	6.45	7.45	7.69	37	18	9	47	28	37.66	155.12	227.29	273.68	0.630898	0.128961	0.224663	false	2.34455	0.00193803	0.0149649	up	-2.44655	2.71707e-23	1.35236e-21	down	3.07632	2.32115e-18	7.71716e-17	up	1408	K13464 jasmonate ZIM domain-containing protein | (RefSeq) protein TIFY 9-like (A)	unknown [Picea sitchensis]	--	A9NZP0_PICSI SubName: Full=Uncharacterized protein {ECO:0000313|EMBL:ABK26101.1};	--	--	tify domain	Tify	TF	Tify
Tify	TF	Tify	Cluster-27241.30927	0.23	0.06	0.14	0.05	0	0	3.56	3.57	4.41	6.86	1	2.4	1.25	0	0	73.74	94.09	135.65	NA	NA	NA	NA	3.75977	0.0360555	0.12699	false	-8.02768	7.12776e-11	1.11534e-09	down	4.63528	9.10328e-15	2.16692e-13	up	1251	K13464 jasmonate ZIM domain-containing protein | (RefSeq) protein TIFY 10b (A)	unknown [Picea sitchensis]	TI10A_ARATH RecName: Full=Protein TIFY 10A; AltName: Full=Jasmonate ZIM domain-containing protein 1;	A9P132_PICSI SubName: Full=Uncharacterized protein {ECO:0000313|EMBL:ABK26593.1};	--	GO:0005634,nucleus; GO:0003714,transcription corepressor activity; GO:0042742,defense response to bacterium; GO:0009908,flower development; GO:0009867,jasmonic acid mediated signaling pathway; GO:1903507,negative regulation of nucleic acid-templated transcription; GO:0009555,pollen development; GO:1900067,regulation of cellular response to alkaline pH; GO:0031347,regulation of defense response; G…	tify domain	Tify	TF	Tify
Tify	TF	Tify	Cluster-27241.30928	0.04	0.06	0	0	0	0	1.58	1.97	2.12	1.14	1	0	0	0	0	32.67	51.98	65.14	NA	NA	NA	NA	4.90624	0.0333619	0.120461	false	-7.96677	5.81167e-10	8.04389e-09	down	5.89093	2.11869e-07	2.04702e-06	up	1251	K13464 jasmonate ZIM domain-containing protein | (RefSeq) protein TIFY 10A-like (A)	unknown [Picea sitchensis]	TI10A_ARATH RecName: Full=Protein TIFY 10A; AltName: Full=Jasmonate ZIM domain-containing protein 1;	A9P132_PICSI SubName: Full=Uncharacterized protein {ECO:0000313|EMBL:ABK26593.1};	--	GO:0005634,nucleus; GO:0003714,transcription corepressor activity; GO:0042742,defense response to bacterium; GO:0009908,flower development; GO:0009867,jasmonic acid mediated signaling pathway; GO:1903507,negative regulation of nucleic acid-templated transcription; GO:0009555,pollen development; GO:1900067,regulation of cellular response to alkaline pH; GO:0031347,regulation of defense response; G…	tify domain	Tify	TF	Tify
Tify	TF	Tify	Cluster-27241.5315	0	0	0	0.03	0.05	0.11	11.37	12.72	13.59	0	0	0	1	1	3	250	355	443	NA	NA	NA	NA	9.51161	6.04427e-06	0.000119881	up	-7.61131	7.59631e-29	5.38604e-27	down	10.507	2.034e-18	6.78869e-17	up	1311	K13464 jasmonate ZIM domain-containing protein | (RefSeq) protein TIFY 9 (A)	unknown [Picea sitchensis]	TIF9_ARATH RecName: Full=Protein TIFY 9; AltName: Full=Jasmonate ZIM domain-containing protein 10; AltName: Full=Protein JASMONATE-ASSOCIATED 1; AltName: Full=Protein JAZ10;	C0PRV6_PICSI SubName: Full=Uncharacterized protein {ECO:0000313|EMBL:ACN40546.1};	--	GO:0005634,nucleus; GO:0042803,protein homodimerization activity; GO:0003714,transcription corepressor activity; GO:0006952,defense response; GO:1903507,negative regulation of nucleic acid-templated transcription; GO:2000022,regulation of jasmonic acid mediated signaling pathway; GO:0010112,regulation of systemic acquired resistance; GO:0006355,regulation of transcription, DNA-templated; GO:00097…	tify domain	Tify	TF	Tify
Tify	TF	Tify	Cluster-27241.94479	0.36	1.28	0.39	0.25	0.11	0	11.5	22.44	19.5	4.71	10	3	3	1	0	103.49	261.12	268.05	NA	NA	NA	NA	3.65725	0.0226562	0.0924889	false	-7.19009	2.84457e-17	8.66377e-16	down	4.69924	1.7718e-15	4.55772e-14	up	NA	NA	NA	NA	NA	NA	NA	NA	NA	NA	NA
Tify	TF	Tify	Cluster-27241.65074	1.42	4.28	0	0	0	0	6.48	11.16	11.25	38.83	69.73	0	0	0	0	123.92	271.23	319.59	-7.92538	0.0426271	0.0904285	false	1.27539	0.65759	0.803696	false	-10.2	2.5521e-16	7.23201e-15	down	2.27543	0.0444725	0.118013	false	1175	K13464 jasmonate ZIM domain-containing protein | (RefSeq) protein TIFY 10A (A)	unknown [Picea sitchensis]	TI10B_ORYSJ RecName: Full=Protein TIFY 10b {ECO:0000305}; Short=OsTIFY10b {ECO:0000303|PubMed:19618278}; AltName: Full=Jasmonate ZIM domain-containing protein 7 {ECO:0000305}; Short=OsJAZ7 {ECO:0000303|PubMed:19618278}; AltName: Full=OsJAZ6 {ECO:0000303|PubMed:21332845};	D5ADR6_PICSI SubName: Full=Uncharacterized protein {ECO:0000313|EMBL:ADE77685.1};	--	GO:0005634,nucleus; GO:0003714,transcription corepressor activity; GO:1903507,negative regulation of nucleic acid-templated transcription; GO:0031347,regulation of defense response; GO:2000022,regulation of jasmonic acid mediated signaling pathway; GO:0006355,regulation of transcription, DNA-templated; GO:0009611,response to wounding; GO:0006351,transcription, DNA-templated; GO:0140110,transcript…	tify domain	Tify	TF	Tify
Tify	TF	Tify	Cluster-27241.7540	0.52	0	0.41	0.13	0.58	0.17	0.74	1.72	1.46	14.35	0	6.75	3.36	11.01	4.21	14.4	42.28	42	NA	NA	NA	NA	1.28172	0.248905	0.45382	false	-2.21751	0.00737069	0.0285675	down	1.98478	0.0475899	0.124577	false	NA	NA	NA	NA	NA	NA	NA	NA	NA	NA	NA
