# Supplementary material for: Physiological and Transcriptomic Analysis Revealed the Molecular Mechanism of Pinus koraiensis Responses to Light
Source: Int J Mol Sci. 2022 Nov 6;23(21):13608. doi: 10.3390/ijms232113608 (PMC9653891; doi:10.3390/ijms232113608)
Supplement: Supplementary file 1 [file ijms-23-13608-s001.zip › Table S10 Statistics of differentially expressed genes involved in plant hormone signal transduction.xlsx]

## Sheet: Sheet1
Supplemental Table S10. Statistics of differentially expressed genes involved in plant hormone signal transduction
Family	ID	TCK-1_fpkm	TCK-2_fpkm	TCK-3_fpkm	TIn4-1_fpkm	TIn4-2_fpkm	TIn4-3_fpkm	TL4-1_fpkm	TL4-2_fpkm	TL4-3_fpkm	TCK-1_count	TCK-2_count	TCK-3_count	TIn4-1_count	TIn4-2_count	TIn4-3_count	TL4-1_count	TL4-2_count	TL4-3_count	TCK_vs_TIn4_log2FoldChange	TCK_vs_TIn4_pvalue	TCK_vs_TIn4_padj	TCK_vs_TIn4_regulated	TCK_vs_TL4TIn4_log2FoldChange	TCK_vs_TL4TIn4_pvalue	TCK_vs_TL4TIn4_padj	TCK_vs_TL4TIn4_regulated	TL4_vs_TIn4_log2FoldChange	TL4_vs_TIn4_pvalue	TL4_vs_TIn4_padj	TL4_vs_TIn4_regulated	TCK_vs_TL4_log2FoldChange	TCK_vs_TL4_pvalue	TCK_vs_TL4_padj	TCK_vs_TL4_regulated	length	KEGG	Nr	Swissprot	TrEMBL	KOG	GO	Pfam	TF-Family	TF-Category	TF-Classification
ABA responsive element binding factor	Cluster-27241.52327	0.02	0.08	0.11	0.57	0.26	0.26	0.79	0.06	0.03	2.88	6.56	8.73	68.68	23	29.87	73.31	6.54	3.71	2.25528	0.000627872	0.00218909	up	2.04413	0.0425758	0.141779	false	0.322138	0.782301	0.892268	false	NA	NA	NA	NA	4632	K14432 ABA responsive element binding factor | (RefSeq) ABSCISIC ACID-INSENSITIVE 5-like protein 4 (A)	hypothetical protein PHYPA_024839, partial [Physcomitrella patens]	AI5L4_ARATH RecName: Full=ABSCISIC ACID-INSENSITIVE 5-like protein 4; AltName: Full=Abscisic acid responsive elements-binding factor 1; Short=ABRE-binding factor 1; AltName: Full=bZIP transcription factor 35; Short=AtbZIP35;	A0A0D6RB37_ARACU SubName: Full=Uncharacterized protein {ECO:0000313|EMBL:JAG99240.1};	--	GO:0005634,nucleus; GO:0003677,DNA binding; GO:0003700,DNA-binding transcription factor activity; GO:0009738,abscisic acid-activated signaling pathway; GO:0006351,transcription, DNA-templated; GO:0003674,molecular_function; GO:0003676,nucleic acid binding; GO:0005488,binding; GO:0097159,organic cyclic compound binding; GO:1901363,heterocyclic compound binding; GO:0140110,transcription regulator a…	bZIP transcription factor	--	--	--
	Cluster-27241.55597	25.3	24.51	23.94	51.82	51.31	52.82	66.07	46.01	45	830	478	467	1554	1145	1502	1515	1338	1528	1.00812	1.07634e-58	7.71005e-57	up	1.00906	1.51993e-14	1.7634e-12	up	-0.00983395	0.957742	0.981407	false	1.02556	1.64651e-07	1.63014e-06	up	1355	K14432 ABA responsive element binding factor | (RefSeq) ABSCISIC ACID-INSENSITIVE 5-like protein 4 (A)	hypothetical protein PHYPA_024839, partial [Physcomitrella patens]	AI5L4_ARATH RecName: Full=ABSCISIC ACID-INSENSITIVE 5-like protein 4; AltName: Full=Abscisic acid responsive elements-binding factor 1; Short=ABRE-binding factor 1; AltName: Full=bZIP transcription factor 35; Short=AtbZIP35;	A0A0C9RQF6_9SPER SubName: Full=TSA: Wollemia nobilis Ref_Wollemi_Transcript_25256_2243 transcribed RNA sequence {ECO:0000313|EMBL:JAG85674.1};	--	GO:0005634,nucleus; GO:0003677,DNA binding; GO:0003700,DNA-binding transcription factor activity; GO:0009738,abscisic acid-activated signaling pathway; GO:0006351,transcription, DNA-templated; GO:0003674,molecular_function; GO:0003676,nucleic acid binding; GO:0005488,binding; GO:0097159,organic cyclic compound binding; GO:1901363,heterocyclic compound binding; GO:0140110,transcription regulator a…	--	--	--	--
	Cluster-27241.55603	3.6	3.37	3.24	8.32	8.05	7.83	8.6	7.45	7.64	224	125	121	475	341.9	422	377	412	491	1.1657	7.2573e-26	1.9517e-24	up	1.14553	1.24498e-29	5.68848e-27	up	0.0289098	0.813723	0.909658	false	1.14446	2.67074e-13	5.50514e-12	up	2341	K14432 ABA responsive element binding factor | (GenBank) ABA response element-binding factor (A)	hypothetical protein 0_13576_02, partial [Pinus taeda]	AI5L5_ARATH RecName: Full=ABSCISIC ACID-INSENSITIVE 5-like protein 5; AltName: Full=ABA-responsive element-binding protein 1; AltName: Full=Abscisic acid responsive elements-binding factor 2; Short=ABRE-binding factor 2; AltName: Full=bZIP transcription factor 36; Short=AtbZIP36;	A0A0D6QWI0_ARACU SubName: Full=Uncharacterized protein {ECO:0000313|EMBL:JAG94816.1};	--	GO:0005634,nucleus; GO:0003677,DNA binding; GO:0003700,DNA-binding transcription factor activity; GO:0009738,abscisic acid-activated signaling pathway; GO:0006351,transcription, DNA-templated; GO:0003674,molecular_function; GO:0003676,nucleic acid binding; GO:0005488,binding; GO:0097159,organic cyclic compound binding; GO:1901363,heterocyclic compound binding; GO:0140110,transcription regulator a…	bZIP transcription factor	--	--	--
	Cluster-27241.85097	2.88	1.03	2.48	2.69	4.2	2.95	6.18	4.3	3.91	278.71	59.47	143.92	238.62	277.06	246.7	422.1	369.05	389.67	0.544568	0.0907119	0.169246	false	0.845686	0.0236705	0.0953168	false	-0.551087	0.0563291	0.153934	false	1.10557	0.00877883	0.0313021	up	NA	NA	NA	NA	NA	NA	NA	NA	NA	NA	NA
abscisic acid receptor PYR/PYL family	Cluster-27241.30352	3.73	4.05	4	1.52	1.53	1.48	1.42	2.18	2.06	172	111	110	64	48	59	46	89	98	-1.44924	8.07513e-14	9.96728e-13	down	-1.27463	4.22667e-09	1.78981e-07	down	-0.336949	0.274483	0.487009	false	-1.11178	2.78147e-05	0.000188592	down	1799	K14496 abscisic acid receptor PYR/PYL family | (RefSeq) abscisic acid receptor PYL2 (A)	abscisic acid receptor PYL2 [Amborella trichopoda]	PYL2_ARATH RecName: Full=Abscisic acid receptor PYL2; AltName: Full=PYR1-like protein 2; AltName: Full=Regulatory components of ABA receptor 14;	U5CQ23_AMBTC SubName: Full=Uncharacterized protein {ECO:0000313|EMBL:ERN15281.1};	--	GO:0005737,cytoplasm; GO:0005634,nucleus; GO:0005886,plasma membrane; GO:0010427,abscisic acid binding; GO:0042802,identical protein binding; GO:0042803,protein homodimerization activity; GO:0004864,protein phosphatase inhibitor activity; GO:0004872,NA; GO:0009738,abscisic acid-activated signaling pathway; GO:0003674,molecular_function; GO:0005488,binding; GO:0008289,lipid binding; GO:0019840,iso…	Polyketide cyclase / dehydrase and lipid transport	--	--	--
	Cluster-27241.84565	1.36	1.23	1.83	0	0	0	0	0	0	60.74	32.79	48.71	0	0	0	0	0	0	-8.26481	2.73368e-11	2.67618e-10	down	-8.31303	1.18786e-15	1.55346e-13	down	NA	NA	NA	NA	-8.34308	1.01188e-10	1.56996e-09	down	NA	NA	NA	NA	NA	NA	NA	NA	NA	NA	NA
	Cluster-27241.67729	0.75	0.48	0.56	1.06	0.79	0.97	1.44	1.26	1.15	36.67	14.09	16.5	47.6	26.29	41.05	49.51	54.62	58	0.568578	0.130775	0.227076	false	0.807173	0.0128092	0.0616634	false	-0.449237	0.169396	0.352297	false	1.02779	0.00914658	0.0324053	up	NA	NA	NA	NA	NA	NA	NA	NA	NA	NA	NA
protein phosphatase 2C	Cluster-27241.102319	2.31	1.86	1.86	5.19	5.35	5.57	3.69	3.33	3.59	94	45	45	193	148	196	105	120	151	1.32811	1.4295e-12	1.58593e-11	up	1.06251	3.133e-05	0.000506122	up	0.600062	0.000816513	0.00418335	false	0.738699	0.00219369	0.00956845	false	1617	K14497 protein phosphatase 2C [EC:3.1.3.16] | (RefSeq) probable protein phosphatase 2C 6 (A)	PREDICTED: probable protein phosphatase 2C 6 [Elaeis guineensis]	P2C06_ORYSJ RecName: Full=Probable protein phosphatase 2C 6; Short=OsPP2C06; EC=3.1.3.16;	A0A0C9S7B8_9SPER SubName: Full=TSA: Wollemia nobilis Ref_Wollemi_Transcript_9202_3641 transcribed RNA sequence {ECO:0000313|EMBL:JAG88262.1};	Serine/threonine protein phosphatase	GO:0046872,metal ion binding; GO:0004722,protein serine/threonine phosphatase activity; GO:0003674,molecular_function; GO:0005488,binding; GO:0043167,ion binding; GO:0043169,cation binding; GO:0003824,catalytic activity; GO:0004721,phosphoprotein phosphatase activity; GO:0016787,hydrolase activity; GO:0016788,hydrolase activity, acting on ester bonds; GO:0016791,phosphatase activity; GO:0042578,p…	Protein phosphatase 2C	--	--	--
	Cluster-27241.106127	0.72	1.17	1.37	3.05	3.36	3.62	2.89	2.69	1.72	30	29	34	116	95	130	84	99	74	1.58179	5.12949e-08	3.36165e-07	up	1.34799	5.6298e-05	0.000837455	up	0.46185	0.131176	0.292691	false	1.1064	0.0107986	0.0372467	up	NA	NA	NA	NA	NA	NA	NA	NA	NA	NA	NA
	Cluster-27241.106129	2.51	5.42	4.06	5.97	10.8	11.79	7.81	12.16	5.86	32	41	30	69	93	131	68	137	78	1.2154	0.00170281	0.00540009	up	1.13219	0.00487781	0.0305358	up	0.148534	0.744199	0.868547	false	1.06204	0.0294045	0.0850458	false	NA	NA	NA	NA	NA	NA	NA	NA	NA	NA	NA
	Cluster-27241.63249	14.58	19.52	18.86	37.37	42.45	43.1	33.78	60.64	56.55	601.16	478.79	464	1410.03	1191.79	1539.72	976.58	2217.86	2410.88	1.14951	6.42742e-21	1.34263e-19	up	1.2991	2.15085e-08	7.79656e-07	up	-0.30348	0.249236	0.457391	false	1.44731	1.71313e-07	1.68978e-06	up	1637	K14497 protein phosphatase 2C [EC:3.1.3.16] | (RefSeq) probable protein phosphatase 2C 51 isoform X1 (A)	protein phosphtase 2C [Marchantia polymorpha]	P2C08_ORYSJ RecName: Full=Probable protein phosphatase 2C 8; Short=OsPP2C08; EC=3.1.3.16;	A0A0D6QVK3_ARACU SubName: Full=Uncharacterized protein {ECO:0000313|EMBL:JAG93750.1};	Serine/threonine protein phosphatase	GO:0046872,metal ion binding; GO:0004722,protein serine/threonine phosphatase activity; GO:0003674,molecular_function; GO:0005488,binding; GO:0043167,ion binding; GO:0043169,cation binding; GO:0003824,catalytic activity; GO:0004721,phosphoprotein phosphatase activity; GO:0016787,hydrolase activity; GO:0016788,hydrolase activity, acting on ester bonds; GO:0016791,phosphatase activity; GO:0042578,p…	Protein phosphatase 2C	--	--	--
	Cluster-27241.63251	17.09	14.58	21.26	34.95	41.71	34.49	29.98	50.76	43.2	84.2	42.13	56.85	151.9	135.34	149.11	95.42	217.46	225.71	1.02525	5.55434e-07	3.17678e-06	up	1.11168	1.22182e-05	0.000221991	up	-0.171901	0.572791	0.757057	false	1.19934	0.000387436	0.00207347	up	418	K14497 protein phosphatase 2C [EC:3.1.3.16] | (RefSeq) probable protein phosphatase 2C 24 (A)	PREDICTED: probable protein phosphatase 2C 24 [Gossypium raimondii]	--	A0A0D6QTG5_ARACU SubName: Full=Uncharacterized protein {ECO:0000313|EMBL:JAG93751.1};	--	GO:0046872,metal ion binding; GO:0004722,protein serine/threonine phosphatase activity; GO:0003674,molecular_function; GO:0005488,binding; GO:0043167,ion binding; GO:0043169,cation binding; GO:0003824,catalytic activity; GO:0004721,phosphoprotein phosphatase activity; GO:0016787,hydrolase activity; GO:0016788,hydrolase activity, acting on ester bonds; GO:0016791,phosphatase activity; GO:0042578,p…	--	--	--	--
	Cluster-27241.75467	5.67	8.73	7.3	13.93	21.87	22.4	19.63	23.72	17.45	255.1	233.75	196.39	574.05	670.71	873.51	620.34	947.32	812.24	1.35793	7.30082e-06	3.54494e-05	up	1.38636	1.49475e-09	7.02931e-08	up	-0.0638397	0.810554	0.907913	false	1.42657	5.9531e-09	7.34941e-08	up	NA	NA	NA	NA	NA	NA	NA	NA	NA	NA	NA
	Cluster-27241.85060	1.02	0.37	0.63	1.57	2.44	1.26	3.8	1.82	1.9	83.12	17.84	30.67	117.14	135.73	88.78	218.33	132.05	159.55	1.28215	0.000870914	0.00295002	up	1.57033	0.000345989	0.003784	up	-0.514923	0.229808	0.433545	false	1.81833	0.000338905	0.00183455	up	NA	NA	NA	NA	NA	NA	NA	NA	NA	NA	NA
	Cluster-27241.17837	0	0	0.73	1.11	1.24	1.16	22.81	97.53	36.61	0	0	5	12	10	12	185	1026	456	NA	NA	NA	NA	6.80541	2.34884e-05	0.000392641	up	-5.50243	4.63166e-19	1.66887e-17	down	7.77773	4.29584e-06	3.36669e-05	up	656	K14497 protein phosphatase 2C [EC:3.1.3.16] | (RefSeq) hypothetical protein (A)	hypothetical protein SELMODRAFT_113714 [Selaginella moellendorffii]	P2C09_ORYSJ RecName: Full=Probable protein phosphatase 2C 9; Short=OsPP2C09; EC=3.1.3.16;	D8SCD8_SELML SubName: Full=Uncharacterized protein {ECO:0000313|EMBL:EFJ17688.1};	Serine/threonine protein phosphatase	GO:0016021,integral component of membrane; GO:0046872,metal ion binding; GO:0004722,protein serine/threonine phosphatase activity; GO:0003674,molecular_function; GO:0005488,binding; GO:0043167,ion binding; GO:0043169,cation binding; GO:0003824,catalytic activity; GO:0004721,phosphoprotein phosphatase activity; GO:0016787,hydrolase activity; GO:0016788,hydrolase activity, acting on ester bonds; GO…	Protein phosphatase 2C	--	--	--
	Cluster-27241.45129	0.16	1.29	1.28	1.99	2.24	2.49	9.59	3.25	3.2	7.94	37.25	37.08	88.53	74.06	104.69	326.71	139.86	160.66	1.25359	0.0289254	0.0650418	false	1.99102	0.00466367	0.0295819	up	-1.24422	0.013314	0.0473623	down	2.49611	0.00165716	0.00750546	up	1881	K14497 protein phosphatase 2C [EC:3.1.3.16] | (RefSeq) probable protein phosphatase 2C 24 (A)	hypothetical protein AXG93_3105s1420 [Marchantia polymorpha subsp. ruderalis]	P2C08_ORYSJ RecName: Full=Probable protein phosphatase 2C 8; Short=OsPP2C08; EC=3.1.3.16;	A0A0D6QTG5_ARACU SubName: Full=Uncharacterized protein {ECO:0000313|EMBL:JAG93751.1};	Serine/threonine protein phosphatase	GO:0046872,metal ion binding; GO:0004722,protein serine/threonine phosphatase activity; GO:0003674,molecular_function; GO:0005488,binding; GO:0043167,ion binding; GO:0043169,cation binding; GO:0003824,catalytic activity; GO:0004721,phosphoprotein phosphatase activity; GO:0016787,hydrolase activity; GO:0016788,hydrolase activity, acting on ester bonds; GO:0016791,phosphatase activity; GO:0042578,p…	Protein phosphatase 2C	--	--	--
	Cluster-27241.45130	0	0	0	0.28	0.99	0.17	0.66	0	1.01	0	0	0	12.17	32.23	7.25	22.25	0	50.09	NA	NA	NA	NA	6.48411	0.000359782	0.00390142	up	-0.224708	0.87492	0.941421	false	6.60038	0.00902947	0.0320663	up	1863	K14497 protein phosphatase 2C [EC:3.1.3.16] | (RefSeq) probable protein phosphatase 2C 24 (A)	protein phosphtase 2C [Marchantia polymorpha]	P2C08_ORYSJ RecName: Full=Probable protein phosphatase 2C 8; Short=OsPP2C08; EC=3.1.3.16;	A0A0D6QTG5_ARACU SubName: Full=Uncharacterized protein {ECO:0000313|EMBL:JAG93751.1};	Serine/threonine protein phosphatase	GO:0046872,metal ion binding; GO:0004722,protein serine/threonine phosphatase activity; GO:0003674,molecular_function; GO:0005488,binding; GO:0043167,ion binding; GO:0043169,cation binding; GO:0003824,catalytic activity; GO:0004721,phosphoprotein phosphatase activity; GO:0016787,hydrolase activity; GO:0016788,hydrolase activity, acting on ester bonds; GO:0016791,phosphatase activity; GO:0042578,p…	Protein phosphatase 2C	--	--	--
	Cluster-27241.58516	14.85	14.27	13.89	23.01	22.43	21.12	39.03	26.39	29.25	1272.47	727.92	715.27	1809.76	1312.36	1567.06	2360.1	2008.84	2586.83	0.553883	8.37336e-26	2.24451e-24	false	0.83022	4.96704e-05	0.000752785	false	-0.51112	0.00345861	0.0149327	false	1.07288	5.03676e-09	6.28573e-08	up	3126	K14497 protein phosphatase 2C [EC:3.1.3.16] | (RefSeq) probable protein phosphatase 2C 8 (A)	unknown [Picea sitchensis]	P2C08_ORYSJ RecName: Full=Probable protein phosphatase 2C 8; Short=OsPP2C08; EC=3.1.3.16;	D5A8K0_PICSI SubName: Full=Uncharacterized protein {ECO:0000313|EMBL:ADE75869.1};	Serine/threonine protein phosphatase	GO:0046872,metal ion binding; GO:0004722,protein serine/threonine phosphatase activity; GO:0003674,molecular_function; GO:0005488,binding; GO:0043167,ion binding; GO:0043169,cation binding; GO:0003824,catalytic activity; GO:0004721,phosphoprotein phosphatase activity; GO:0016787,hydrolase activity; GO:0016788,hydrolase activity, acting on ester bonds; GO:0016791,phosphatase activity; GO:0042578,p…	Protein phosphatase 2C	--	--	--
	Cluster-27241.63250	12.69	13.9	12.22	27.35	25.99	26.78	42.44	41.45	38.52	103.43	66.88	56.31	199.86	141.65	190.53	230.75	296.72	329.75	0.99672	6.50417e-09	4.80223e-08	false	1.3263	1.02387e-07	3.19238e-06	up	-0.605866	5.12438e-05	0.000336272	false	1.60581	2.28971e-17	7.04169e-16	up	529	K14497 protein phosphatase 2C [EC:3.1.3.16] | (RefSeq) probable protein phosphatase 2C 24 (A)	probable protein phosphatase 2C 24 [Amborella trichopoda]	--	A0A0D6QTG5_ARACU SubName: Full=Uncharacterized protein {ECO:0000313|EMBL:JAG93751.1};	--	GO:0046872,metal ion binding; GO:0004722,protein serine/threonine phosphatase activity; GO:0003674,molecular_function; GO:0005488,binding; GO:0043167,ion binding; GO:0043169,cation binding; GO:0003824,catalytic activity; GO:0004721,phosphoprotein phosphatase activity; GO:0016787,hydrolase activity; GO:0016788,hydrolase activity, acting on ester bonds; GO:0016791,phosphatase activity; GO:0042578,p…	--	--	--	--
serine/threonine-protein kinase SRK2	Cluster-27241.74055	33.82	32.14	32.33	66.64	67.93	61.99	64.09	111.36	113.16	2564.95	1451.29	1471.99	4636.36	3516.06	4070.52	3427.28	7500.43	8858.5	0.923648	2.44736e-105	3.58967e-103	false	1.23017	7.48683e-07	1.88495e-05	up	-0.56214	0.0238402	0.0770103	false	1.48841	6.7331e-10	9.43127e-09	up	NA	NA	NA	NA	NA	NA	NA	NA	NA	NA	NA
	Cluster-27241.74056	0.22	0.1	0.1	0.39	0.09	0.28	1.11	0.75	0.75	18.05	4.71	5.01	28.64	4.94	19.48	62.72	53.57	62.5	NA	NA	NA	NA	1.872	0.0149977	0.0689949	false	-1.77281	0.00226641	0.0103386	down	2.47687	4.82397e-06	3.7448e-05	up	NA	NA	NA	NA	NA	NA	NA	NA	NA	NA	NA
	Cluster-27241.71701	0	0.06	0.33	0.2	0.37	0.37	0	0	0	0	3.03	17.51	16.29	22.23	28.09	0	0	0	1.17088	0.29787	0.431154	false	0.132878	0.952202	0.976996	false	7.00469	1.10757e-06	9.45261e-06	up	NA	NA	NA	NA	NA	NA	NA	NA	NA	NA	NA	NA	NA	NA	NA
auxin influx carrier (AUX1 LAX family)	Cluster-27241.93457	0	0.05	0	0	0	0	2.59	3.81	3.95	0	1.74	0	0	0	0	114.93	212.81	256.32	NA	NA	NA	NA	6.55621	0.0468568	0.15143	false	-9.91829	8.04477e-16	2.16901e-14	down	7.81528	4.26604e-13	8.57791e-12	up	NA	NA	NA	NA	NA	NA	NA	NA	NA	NA	NA
	Cluster-27241.93465	0.43	0.1	0.53	0.34	0.09	0.35	5.89	6.82	9.49	7	1	5	5	1	5	65.77	97.85	160.28	NA	NA	NA	NA	3.37345	0.00997799	0.0516555	false	-4.77395	1.72712e-15	4.53516e-14	down	4.29896	2.70456e-13	5.56819e-12	up	NA	NA	NA	NA	NA	NA	NA	NA	NA	NA	NA
auxin response factor	Cluster-27241.76050	0.16	0.29	0.33	0.84	0.79	0.67	0.92	1.13	1.01	14.27	15.62	17.89	69.59	48.65	52.66	58.62	90.79	94.34	1.53343	6.93745e-05	0.000289085	up	1.75153	4.68671e-07	1.23896e-05	up	-0.416385	0.122457	0.278467	false	1.9387	9.7971e-06	7.18287e-05	up	NA	NA	NA	NA	NA	NA	NA	NA	NA	NA	NA
	Cluster-27241.84374	0.83	0.52	0.55	1.99	1.83	1.67	3.41	1.32	0.92	41.34	15.52	16.39	91.36	62.39	72.31	119.86	58.63	47.74	1.42222	3.03229e-06	1.55525e-05	up	1.46225	0.00116852	0.00996933	up	-0.0466435	0.931875	0.970137	false	1.50867	0.0159083	0.0514878	false	NA	NA	NA	NA	NA	NA	NA	NA	NA	NA	NA
	Cluster-27241.103654	2.53	2.6	2.37	3.78	3.9	3.77	5.73	5.22	5.03	146.72	89.83	82.58	201.53	154.65	189.59	234.21	269.45	301.72	0.537701	0.000407332	0.00147182	false	0.794211	0.000113437	0.00149194	false	-0.479008	0.00190196	0.00884212	false	1.02118	1.31837e-08	1.56371e-07	up	2202	K14486 auxin response factor | (RefSeq) auxin response factor 19 isoform X1 (A)	putative auxin response factor 10/16/17, partial [Cycas rumphii]	ARFR_ORYSJ RecName: Full=Auxin response factor 18; AltName: Full=OsARF10;	A0A0D6QZZ4_ARACU RecName: Full=Auxin response factor {ECO:0000256|RuleBase:RU004561};	--	GO:0005634,nucleus; GO:0003677,DNA binding; GO:0009734,auxin-activated signaling pathway; GO:0006355,regulation of transcription, DNA-templated; GO:0006351,transcription, DNA-templated; GO:0003674,molecular_function; GO:0003676,nucleic acid binding; GO:0005488,binding; GO:0097159,organic cyclic compound binding; GO:1901363,heterocyclic compound binding; GO:0007165,signal transduction; GO:0007154,…	Auxin response factor	B3-ARF	TF	B3->B3-ARF
	Cluster-27241.75168	1.93	2.24	2.14	4.06	3.55	3.89	8.53	4.64	4.7	301	209	202	583	379	526	944	645	757	0.802388	2.34323e-13	2.78475e-12	false	1.14002	9.99267e-05	0.00134093	up	-0.638356	0.0251633	0.0803487	false	1.43565	2.01142e-06	1.66063e-05	up	NA	NA	NA	NA	NA	NA	NA	NA	NA	NA	NA
	Cluster-27241.81122	11.15	11.73	10.55	13.58	13.3	12.79	7.22	5.83	5.66	545.67	341.64	308.7	608.59	443.63	542.25	248.18	252.97	286.13	0.174769	0.0350867	0.0767022	false	-0.276749	0.420005	0.622797	false	1.08709	4.60939e-13	9.44911e-12	up	-0.908414	7.23579e-08	7.6031e-07	false	NA	NA	NA	NA	NA	NA	NA	NA	NA	NA	NA
auxin responsive GH3 gene family	Cluster-27241.29952	0.03	0	0	0.05	0.18	0.04	2.61	3.15	2.13	1.5	0	0	2.67	7	2	105.85	161.25	126.85	NA	NA	NA	NA	6.57266	0.000176002	0.00215695	up	-4.93216	2.95845e-17	8.98732e-16	down	7.34986	2.63604e-11	4.42905e-10	up	2189	K14487 auxin responsive GH3 gene family | (RefSeq) indole-3-acetic acid-amido synthetase GH3.6 (A)	GH3 auxin-responsive promoter [Macleaya cordata]	GH36_ARATH RecName: Full=Indole-3-acetic acid-amido synthetase GH3.6; EC=6.3.2.-; AltName: Full=Auxin-responsive GH3-like protein 6; Short=AtGH3-6; AltName: Full=Protein DWARF IN LIGHT 1; Short=DFL-1;	A0A200Q551_9MAGN SubName: Full=GH3 auxin-responsive promoter {ECO:0000313|EMBL:OVA05552.1};	--	GO:0009507,chloroplast; GO:0005737,cytoplasm; GO:0010279,indole-3-acetic acid amido synthetase activity; GO:0010252,auxin homeostasis; GO:0009734,auxin-activated signaling pathway; GO:0009733,response to auxin; GO:0009826,unidimensional cell growth; GO:0003674,molecular_function; GO:0003824,catalytic activity; GO:0016874,ligase activity; GO:0016879,ligase activity, forming carbon-nitrogen bonds; …	GH3 auxin-responsive promoter	--	--	--
	Cluster-27241.29954	0.03	0.09	0.14	0.1	0	0.04	3.8	3.04	3.59	1.5	3	5	5.33	0	2	154.15	155.75	214.15	NA	NA	NA	NA	4.24611	0.00592745	0.0353123	up	-6.16225	4.43765e-23	2.17494e-21	down	5.35858	2.0378e-22	9.2113e-21	up	2189	K14487 auxin responsive GH3 gene family | (RefSeq) indole-3-acetic acid-amido synthetase GH3.6 (A)	GH3 auxin-responsive promoter [Macleaya cordata]	GH36_ARATH RecName: Full=Indole-3-acetic acid-amido synthetase GH3.6; EC=6.3.2.-; AltName: Full=Auxin-responsive GH3-like protein 6; Short=AtGH3-6; AltName: Full=Protein DWARF IN LIGHT 1; Short=DFL-1;	A0A200Q551_9MAGN SubName: Full=GH3 auxin-responsive promoter {ECO:0000313|EMBL:OVA05552.1};	--	GO:0009507,chloroplast; GO:0005737,cytoplasm; GO:0010279,indole-3-acetic acid amido synthetase activity; GO:0010252,auxin homeostasis; GO:0009734,auxin-activated signaling pathway; GO:0009733,response to auxin; GO:0009826,unidimensional cell growth; GO:0003674,molecular_function; GO:0003824,catalytic activity; GO:0016874,ligase activity; GO:0016879,ligase activity, forming carbon-nitrogen bonds; …	GH3 auxin-responsive promoter	--	--	--
auxin-responsive protein IAA	Cluster-27241.41569	1.78	1.77	1.79	3.2	2.61	2.71	10.43	15	15.84	103	61	62	170	103	136	425	771	947	0.607253	0.00110549	0.00366606	false	2.15293	0.000950351	0.00842455	up	-2.28282	4.49388e-22	2.03286e-20	down	2.88837	2.18766e-33	1.78983e-31	up	2195	K14484 auxin-responsive protein IAA | (RefSeq) LOW QUALITY PROTEIN: auxin-responsive protein IAA13 (A)	LOW QUALITY PROTEIN: auxin-responsive protein IAA13 [Sesamum indicum]	IAA13_ARATH RecName: Full=Auxin-responsive protein IAA13; AltName: Full=Indoleacetic acid-induced protein 13;	A0A0D6QZL0_ARACU RecName: Full=Auxin-responsive protein {ECO:0000256|RuleBase:RU004549};	--	GO:0005634,nucleus; GO:0003700,DNA-binding transcription factor activity; GO:0009734,auxin-activated signaling pathway; GO:0009733,response to auxin; GO:0006351,transcription, DNA-templated; GO:0140110,transcription regulator activity; GO:0003674,molecular_function; GO:0007165,signal transduction; GO:0007154,cell communication; GO:0008150,biological_process; GO:0009719,response to endogenous stim…	AUX/IAA family	AUX/IAA	TR	AUX/IAA
	Cluster-27241.60604	9.92	9.16	10.7	11.81	10.11	10.44	24.69	23.35	25.13	108	59	67	116	74	99	182	224	286	0.061179	0.756798	0.842403	false	0.761302	0.0568828	0.172083	false	-1.17588	6.71585e-11	1.05416e-09	down	1.24031	1.08216e-10	1.67373e-09	up	621	K14484 auxin-responsive protein IAA | (RefSeq) auxin-responsive protein IAA27-like (A)	auxin-induced protein 1 [Pinus massoniana]	IAA16_ARATH RecName: Full=Auxin-responsive protein IAA16; AltName: Full=Indoleacetic acid-induced protein 16;	A0A0N9WSD9_9SPER RecName: Full=Auxin-responsive protein {ECO:0000256|RuleBase:RU004549};	--	GO:0005634,nucleus; GO:0003700,DNA-binding transcription factor activity; GO:0009734,auxin-activated signaling pathway; GO:0009733,response to auxin; GO:0006351,transcription, DNA-templated; GO:0140110,transcription regulator activity; GO:0003674,molecular_function; GO:0007165,signal transduction; GO:0007154,cell communication; GO:0008150,biological_process; GO:0009719,response to endogenous stim…	--	AUX/IAA	TR	AUX/IAA
SAUR family protein	Cluster-24980.0	0.37	0.19	0.4	1.11	0.53	1.27	0.58	0.68	0.53	14.9	4.53	9.56	40.95	14.51	44.36	16.39	24.46	22	1.47863	0.00730997	0.0197698	up	1.15225	0.0252272	0.0996457	false	0.730617	0.157489	0.333671	false	NA	NA	NA	NA	1608	K14488 SAUR family protein | (RefSeq) uncharacterized protein LOC112283951 (A)	PREDICTED: auxin-responsive protein SAUR72-like [Daucus carota subsp. sativus]	--	A0A166C1L4_DAUCA SubName: Full=Uncharacterized protein {ECO:0000313|EMBL:KZN03164.1};	--	GO:0009733,response to auxin; GO:0008150,biological_process; GO:0009719,response to endogenous stimulus; GO:0009725,response to hormone; GO:0010033,response to organic substance; GO:0042221,response to chemical; GO:0050896,response to stimulus	Auxin responsive protein	--	--	--
	Cluster-27241.60856	0.58	1.02	0.49	2.28	1.96	1.53	0.67	0.97	1.08	16	16.93	8	58	37.07	37	13	24	31	1.41379	0.000992412	0.00332131	up	0.95686	0.0646613	0.188167	false	1.06164	0.0106009	0.0390432	up	NA	NA	NA	NA	1188	K14488 SAUR family protein | (RefSeq) auxin-responsive protein SAUR32-like (A)	unknown [Picea sitchensis]	SAU32_ARATH RecName: Full=Auxin-responsive protein SAUR32 {ECO:0000305}; AltName: Full=Protein ABOLISHED APICAL HOOK MAINTENANCE 1 {ECO:0000303|Ref.6}; AltName: Full=Protein SMALL AUXIN UP RNA 32 {ECO:0000303|PubMed:12036261};	A9P2A6_PICSI SubName: Full=Uncharacterized protein {ECO:0000313|EMBL:ABK27017.1};	--	GO:0005737,cytoplasm; GO:0005634,nucleus; GO:0009734,auxin-activated signaling pathway; GO:0007275,multicellular organism development; GO:0040008,regulation of growth; GO:1900140,regulation of seedling development; GO:0007165,signal transduction; GO:0007154,cell communication; GO:0008150,biological_process; GO:0009719,response to endogenous stimulus; GO:0009725,response to hormone; GO:0009733,res…	Auxin responsive protein	--	--	--
	Cluster-27241.47176	4.96	3.83	4.2	0	0	0	1.84	3.24	1.25	126	57.73	63.12	0	0	0	32.6	72.99	32.99	-9.00107	1.02424e-13	1.25328e-12	down	-2.08642	0.21652	0.416496	false	-7.90594	1.28031e-08	1.46245e-07	down	-1.09056	0.0160244	0.0518063	false	1107	K14488 SAUR family protein | (RefSeq) auxin-responsive protein SAUR50 (A)	unknown [Picea sitchensis]	SAU50_ARATH RecName: Full=Auxin-responsive protein SAUR50 {ECO:0000303|PubMed:12036261}; AltName: Full=Protein SMALL AUXIN UP RNA 50 {ECO:0000303|PubMed:12036261};	B8LPR0_PICSI SubName: Full=Uncharacterized protein {ECO:0000313|EMBL:ABR17640.1};	--	GO:0009734,auxin-activated signaling pathway; GO:0040008,regulation of growth; GO:0007165,signal transduction; GO:0007154,cell communication; GO:0008150,biological_process; GO:0009719,response to endogenous stimulus; GO:0009725,response to hormone; GO:0009733,response to auxin; GO:0009755,hormone-mediated signaling pathway; GO:0009987,cellular process; GO:0010033,response to organic substance; GO…	Auxin responsive protein	--	--	--
	Cluster-27241.56767	4.75	4.32	4.96	1.97	2.73	2.49	2.41	1.83	2.65	161	87	100	61	63	73	57	55	93	-1.04385	9.63905e-07	5.32166e-06	down	-1.07304	5.45065e-08	1.80437e-06	down	0.0560944	0.858495	0.933143	false	-1.09042	2.62558e-05	0.000179045	down	1391	K14488 SAUR family protein | (RefSeq) auxin-responsive protein SAUR71-like (A)	PREDICTED: auxin-responsive protein SAUR71-like [Pyrus x bretschneideri]	SAU72_ARATH RecName: Full=Auxin-responsive protein SAUR72 {ECO:0000305}; AltName: Full=Protein SMALL AUXIN UP RNA 72 {ECO:0000303|PubMed:12036261};	W9R0C8_9ROSA SubName: Full=Uncharacterized protein {ECO:0000313|EMBL:EXB53356.1};	--	GO:0005737,cytoplasm; GO:0009734,auxin-activated signaling pathway; GO:0007275,multicellular organism development; GO:0040008,regulation of growth; GO:0007165,signal transduction; GO:0007154,cell communication; GO:0008150,biological_process; GO:0009719,response to endogenous stimulus; GO:0009725,response to hormone; GO:0009733,response to auxin; GO:0009755,hormone-mediated signaling pathway; GO:0…	Auxin responsive protein	--	--	--
	Cluster-27241.69102	9.26	8.36	12.3	3.82	3.54	3.62	3.87	7.21	6.21	362.55	194.69	286.96	136.86	94.37	122.94	106.2	250.33	251.23	-1.51608	1.07986e-17	1.82483e-16	down	-1.15341	0.000226349	0.00266111	down	-0.665127	0.0311551	0.095834	false	-0.854737	0.00693429	0.0257542	false	NA	NA	NA	NA	NA	NA	NA	NA	NA	NA	NA
	Cluster-27241.73073	4.13	3.92	2.91	0.83	0.98	0.78	1.03	1.68	1.4	149.27	84.28	62.52	27.33	24.2	24.45	25.96	53.7	52.47	-2.18643	6.01957e-15	8.16474e-14	down	-1.78515	6.10388e-08	1.9886e-06	down	-0.701647	0.0871251	0.21568	false	-1.47366	1.00256e-05	7.33479e-05	down	NA	NA	NA	NA	NA	NA	NA	NA	NA	NA	NA
	Cluster-625.0	0	0	0	0	0	0	1.46	3.55	2.74	0	0	0	0	0	0	14	44	40	NA	NA	NA	NA	6.05855	0.0399571	0.135941	false	-7.33422	2.76065e-07	2.56187e-06	down	7.05951	9.1298e-07	7.9733e-06	up	NA	NA	NA	NA	NA	NA	NA	NA	NA	NA	NA
	Cluster-27241.123421	0.07	0	0.12	0.16	0	0.08	2.36	2.15	2.36	1	0	1	2	0	1	23	27	35	NA	NA	NA	NA	4.15011	0.0196361	0.0836864	false	-4.7591	2.57577e-06	2.07207e-05	down	5.09268	1.65204e-05	0.000116724	up	NA	NA	NA	NA	NA	NA	NA	NA	NA	NA	NA
	Cluster-27241.129103	0	0	0	0.07	0	0	0.66	2.41	2.79	0	0	0	1	0	0	7	33	45	NA	NA	NA	NA	5.82032	0.0201906	0.0852898	false	-6.11853	5.246e-05	0.000343294	down	6.80268	1.79176e-05	0.000125565	up	NA	NA	NA	NA	NA	NA	NA	NA	NA	NA	NA
	Cluster-27241.18272	1.46	1.03	1.36	0.83	0.97	0.65	3.81	3.57	3.64	31	13	17	16	14	12	56	67	80	NA	NA	NA	NA	0.73524	0.298073	0.506994	false	-2.18245	6.39319e-09	7.65991e-08	down	1.43801	5.13648e-05	0.0003294	up	966	K14488 SAUR family protein | (RefSeq) auxin-responsive protein SAUR32-like (A)	hypothetical protein 0_8672_01, partial [Pinus taeda]	SAU32_ARATH RecName: Full=Auxin-responsive protein SAUR32 {ECO:0000305}; AltName: Full=Protein ABOLISHED APICAL HOOK MAINTENANCE 1 {ECO:0000303|Ref.6}; AltName: Full=Protein SMALL AUXIN UP RNA 32 {ECO:0000303|PubMed:12036261};	H9W2Z5_PINTA SubName: Full=Uncharacterized protein {ECO:0000313|EMBL:AFG56388.1}; Flags: Fragment;	--	GO:0005737,cytoplasm; GO:0005634,nucleus; GO:0009734,auxin-activated signaling pathway; GO:0007275,multicellular organism development; GO:0040008,regulation of growth; GO:1900140,regulation of seedling development; GO:0007165,signal transduction; GO:0007154,cell communication; GO:0008150,biological_process; GO:0009719,response to endogenous stimulus; GO:0009725,response to hormone; GO:0009733,res…	Auxin responsive protein	--	--	--
	Cluster-27241.6742	1.01	1.11	1.05	0.61	0.64	0.89	1.87	5.88	6.51	16.47	10.77	10	9	7	12.6	20.9	84.62	110.37	NA	NA	NA	NA	1.32424	0.141163	0.316498	false	-2.73251	3.98798e-05	0.000266513	down	2.12516	0.000734326	0.00366833	up	NA	NA	NA	NA	NA	NA	NA	NA	NA	NA	NA
brassinosteroid insensitive 1-associated receptor kinase 1	Cluster-27241.93250	0.51	0.11	0.31	1	1.07	0.43	0.96	0.52	0.46	46.53	5.82	16.78	83.18	66.5	33.67	61.57	42.35	42.93	1.29844	0.0163567	0.0399118	up	1.13447	0.0349808	0.124365	false	0.351917	0.501502	0.702161	false	0.968313	0.151727	0.297732	false	NA	NA	NA	NA	NA	NA	NA	NA	NA	NA	NA
	Cluster-27241.16988	0	0	0	1.54	2.07	1.43	0	0	0.1	0	0	0	27.71	27.68	24.44	0	0	2.15	6.91809	2.04169e-07	1.23485e-06	up	5.9375	0.0135849	0.0644009	false	5.47007	7.76382e-06	5.82353e-05	up	NA	NA	NA	NA	NA	NA	NA	NA	NA	NA	NA	NA	NA	NA	NA
	Cluster-27241.35723	2.29	3.11	4.24	7.97	5.99	7.35	5.98	3.92	4.97	51.2	41.29	55.94	162.26	90.78	142.57	92.81	77.58	115.37	1.10665	3.99132e-05	0.00017249	up	0.849886	0.00619303	0.0364568	false	0.52536	0.0454798	0.130192	false	0.575154	0.124311	0.25797	false	1005	K13416 brassinosteroid insensitive 1-associated receptor kinase 1 [EC:2.7.10.1 2.7.11.1] | (RefSeq) BRASSINOSTEROID INSENSITIVE 1-associated receptor kinase 1-like (A)	hypothetical protein AMTR_s00029p00129930 [Amborella trichopoda]	CRPK1_ARATH RecName: Full=Cold-responsive protein kinase 1 {ECO:0000303|PubMed:28344081}; EC=2.7.11.1 {ECO:0000255|PROSITE-ProRule:PRU00159, ECO:0000269|PubMed:28344081};	A0A0D6QRJ0_ARACU SubName: Full=Uncharacterized protein {ECO:0000313|EMBL:JAG93852.1};	--	GO:0005886,plasma membrane; GO:0005524,ATP binding; GO:0004674,protein serine/threonine kinase activity; GO:0033160,positive regulation of protein import into nucleus, translocation; GO:0046777,protein autophosphorylation; GO:0009409,response to cold; GO:0050826,response to freezing; GO:0009625,response to insect; GO:0002237,response to molecule of bacterial origin; GO:0000166,nucleotide binding;…	Sec-independent protein translocase protein (TatC)	--	--	--
	Cluster-27241.57826	2.65	2.78	1.68	5.37	5.07	5.56	1.67	0.29	0.41	45.68	28.48	17	84.13	59.23	83.28	19.79	4.41	7.39	1.09052	0.0001508	0.000590681	up	0.286642	0.755449	0.867036	false	2.82981	6.09355e-05	0.000394435	up	-1.70657	0.0384539	0.105278	false	834	K13416 brassinosteroid insensitive 1-associated receptor kinase 1 [EC:2.7.10.1 2.7.11.1] | (RefSeq) somatic embryogenesis receptor kinase 5 isoform X1 (A)	hypothetical protein POPTR_0012s01750g [Populus trichocarpa]	LRL21_ARATH RecName: Full=LEAF RUST 10 DISEASE-RESISTANCE LOCUS RECEPTOR-LIKE PROTEIN KINASE-like 2.1 {ECO:0000303|PubMed:12805585}; EC=2.7.11.1; AltName: Full=Probable receptor-like serine/threonine-protein kinase LRK10L-2.1 {ECO:0000305}; Flags: Precursor;	A0A0D6QSA8_ARACU SubName: Full=Uncharacterized protein {ECO:0000313|EMBL:JAG93241.1};	Serine/threonine protein kinase	GO:0016021,integral component of membrane; GO:0005524,ATP binding; GO:0004674,protein serine/threonine kinase activity; GO:0000166,nucleotide binding; GO:0003674,molecular_function; GO:0005488,binding; GO:0008144,drug binding; GO:0017076,purine nucleotide binding; GO:0030554,adenyl nucleotide binding; GO:0032553,ribonucleotide binding; GO:0032555,purine ribonucleotide binding; GO:0032559,adenyl r…	Protein kinase domain	--	--	--
	Cluster-27241.58248	3.21	3.23	2.05	6.61	6.93	8.51	1.06	0.9	1.01	52.11	31.06	19.43	97.42	76.08	120.06	11.8	12.98	17	1.30779	4.5286e-06	2.26929e-05	up	0.493937	0.550925	0.729246	false	2.88756	8.36946e-15	2.04105e-13	up	-1.56745	0.0010433	0.00499171	down	800	K13416 brassinosteroid insensitive 1-associated receptor kinase 1 [EC:2.7.10.1 2.7.11.1] | (RefSeq) BRASSINOSTEROID INSENSITIVE 1-associated receptor kinase 1 (A)	PREDICTED: rust resistance kinase Lr10-like isoform X1 [Gossypium hirsutum]	LRK10_WHEAT RecName: Full=Rust resistance kinase Lr10 {ECO:0000312|EMBL:AAC49629.1}; EC=2.7.11.1; AltName: Full=Probable receptor-like serine/threonine-protein kinase LRK10; Flags: Precursor;	A0A0D6QSA8_ARACU SubName: Full=Uncharacterized protein {ECO:0000313|EMBL:JAG93241.1};	Serine/threonine protein kinase	GO:0016021,integral component of membrane; GO:0005886,plasma membrane; GO:0005524,ATP binding; GO:0004674,protein serine/threonine kinase activity; GO:0000166,nucleotide binding; GO:0003674,molecular_function; GO:0005488,binding; GO:0008144,drug binding; GO:0017076,purine nucleotide binding; GO:0030554,adenyl nucleotide binding; GO:0032553,ribonucleotide binding; GO:0032555,purine ribonucleotide …	Protein kinase domain	--	--	--
	Cluster-27241.85716	2.75	1.98	2.2	13.87	13.25	13.17	2.06	1.81	2.3	47.14	20.1	22.08	215.85	153.56	195.99	24.27	27.37	40.87	2.44742	2.55589e-28	7.82991e-27	up	1.67144	0.0313544	0.115523	false	2.7112	5.98469e-28	4.06348e-26	up	-0.245243	0.542011	0.703005	false	NA	NA	NA	NA	NA	NA	NA	NA	NA	NA	NA
	Cluster-27241.88459	2.23	2.25	2.7	7.46	7.39	6.57	20.34	13.67	13.13	45	27	32	137	101	115	284	244	275	1.5177	7.37078e-11	6.8817e-10	up	2.18408	2.66028e-07	7.44758e-06	up	-1.13496	4.01376e-06	3.13616e-05	down	2.6546	5.6102e-18	1.81274e-16	up	NA	NA	NA	NA	NA	NA	NA	NA	NA	NA	NA
	Cluster-27241.36215	0.86	0.58	0.87	0	0.08	0.08	0	0	0	43.3	17.37	26.07	0	2.85	3.65	0	0	0	-3.79674	1.06901e-06	5.86754e-06	down	-4.78821	0.000272206	0.00310744	down	NA	NA	NA	NA	-7.55894	2.51301e-08	2.86521e-07	down	1937	K13416 brassinosteroid insensitive 1-associated receptor kinase 1 [EC:2.7.10.1 2.7.11.1] | (RefSeq) BRASSINOSTEROID INSENSITIVE 1-associated receptor kinase 1-like isoform X1 (A)	unknown [Picea sitchensis]	Y5977_ARATH RecName: Full=Probable leucine-rich repeat receptor-like protein kinase At5g49770; EC=2.7.11.1; Flags: Precursor;	D5A9B2_PICSI SubName: Full=Uncharacterized protein {ECO:0000313|EMBL:ADE76131.1};	--	GO:0016021,integral component of membrane; GO:0005524,ATP binding; GO:0004674,protein serine/threonine kinase activity; GO:0000166,nucleotide binding; GO:0003674,molecular_function; GO:0005488,binding; GO:0008144,drug binding; GO:0017076,purine nucleotide binding; GO:0030554,adenyl nucleotide binding; GO:0032553,ribonucleotide binding; GO:0032555,purine ribonucleotide binding; GO:0032559,adenyl r…	Protein kinase domain	--	--	--
	Cluster-27241.49183	1.84	2.57	3.05	0.56	0.3	0.35	0	0	0	36	29.8	35.1	10	4	6	0	0	0	-2.6542	4.30318e-07	2.50044e-06	down	-3.70231	0.00343689	0.023365	down	NA	NA	NA	NA	-7.88817	3.32095e-09	4.26956e-08	down	911	K13416 brassinosteroid insensitive 1-associated receptor kinase 1 [EC:2.7.10.1 2.7.11.1] | (RefSeq) hypothetical protein (A)	rust resistance kinase Lr10-like [Manihot esculenta]	LRK10_WHEAT RecName: Full=Rust resistance kinase Lr10 {ECO:0000312|EMBL:AAC49629.1}; EC=2.7.11.1; AltName: Full=Probable receptor-like serine/threonine-protein kinase LRK10; Flags: Precursor;	A0A0D6QSA8_ARACU SubName: Full=Uncharacterized protein {ECO:0000313|EMBL:JAG93241.1};	Serine/threonine protein kinase	GO:0016021,integral component of membrane; GO:0005886,plasma membrane; GO:0005524,ATP binding; GO:0004674,protein serine/threonine kinase activity; GO:0000166,nucleotide binding; GO:0003674,molecular_function; GO:0005488,binding; GO:0008144,drug binding; GO:0017076,purine nucleotide binding; GO:0030554,adenyl nucleotide binding; GO:0032553,ribonucleotide binding; GO:0032555,purine ribonucleotide …	Protein kinase domain	--	--	--
	Cluster-27241.51772	5.36	2.89	6.25	2.91	1.51	2.72	4.76	3.21	3.07	88	28.09	60.01	43.33	16.72	38.78	53.77	46.56	52.38	-1.07465	0.00590932	0.0163984	down	-0.742701	0.0611537	0.181151	false	-0.6096	0.154369	0.329108	false	-0.459816	0.288596	0.465396	false	806	K13416 brassinosteroid insensitive 1-associated receptor kinase 1 [EC:2.7.10.1 2.7.11.1] | (RefSeq) BRASSINOSTEROID INSENSITIVE 1-associated receptor kinase 1-like isoform X1 (A)	hypothetical protein AMTR_s00032p00079260 [Amborella trichopoda]	Y1561_ARATH RecName: Full=Probable LRR receptor-like serine/threonine-protein kinase At1g56130; EC=2.7.11.1; Flags: Precursor;	A0A1D1XM42_9ARAE SubName: Full=Putative LRR receptor-like serine/threonine-protein kinase At1g56130 {ECO:0000313|EMBL:JAT43462.1}; Flags: Fragment;	--	GO:0016021,integral component of membrane; GO:0005886,plasma membrane; GO:0005524,ATP binding; GO:0004674,protein serine/threonine kinase activity; GO:0000166,nucleotide binding; GO:0003674,molecular_function; GO:0005488,binding; GO:0008144,drug binding; GO:0017076,purine nucleotide binding; GO:0030554,adenyl nucleotide binding; GO:0032553,ribonucleotide binding; GO:0032555,purine ribonucleotide …	Protein kinase domain	--	--	--
	Cluster-27241.52946	1.41	1.76	1.28	0	0	0	0	0	0	42.05	31.18	22.64	0	0	0	0	0	0	-7.68281	1.59198e-09	1.27789e-08	down	-7.72962	4.8313e-12	3.49914e-10	down	NA	NA	NA	NA	-7.75989	4.47388e-09	5.6343e-08	down	1253	K13416 brassinosteroid insensitive 1-associated receptor kinase 1 [EC:2.7.10.1 2.7.11.1] | (RefSeq) BRASSINOSTEROID INSENSITIVE 1-associated receptor kinase 1-like isoform X1 (A)	unknown [Picea sitchensis]	CRK6_ARATH RecName: Full=Cysteine-rich receptor-like protein kinase 6; Short=Cysteine-rich RLK6; EC=2.7.11.-; AltName: Full=Receptor-like protein kinase 5; Flags: Precursor;	A0A0D6QTZ7_ARACU SubName: Full=Uncharacterized protein {ECO:0000313|EMBL:JAG93205.1};	--	GO:0016021,integral component of membrane; GO:0005886,plasma membrane; GO:0005524,ATP binding; GO:0004672,protein kinase activity; GO:0004674,protein serine/threonine kinase activity; GO:0042742,defense response to bacterium; GO:0000302,response to reactive oxygen species; GO:0000166,nucleotide binding; GO:0003674,molecular_function; GO:0005488,binding; GO:0008144,drug binding; GO:0017076,purine …	Protein kinase domain	--	--	--
	Cluster-27241.63797	15.53	12.92	15.17	7.55	6.5	6.56	10.03	9.74	8.83	457	226	265	203	130	167.53	206	254	269	-1.15164	2.17606e-19	4.12126e-18	down	-0.898987	3.08982e-06	6.66788e-05	false	-0.471396	0.00474405	0.0195894	false	-0.676258	3.36513e-05	0.000224455	false	1242	K13416 brassinosteroid insensitive 1-associated receptor kinase 1 [EC:2.7.10.1 2.7.11.1] | (RefSeq) BRASSINOSTEROID INSENSITIVE 1-associated receptor kinase 1-like isoform X1 (A)	PREDICTED: rust resistance kinase Lr10-like [Elaeis guineensis]	LRK10_WHEAT RecName: Full=Rust resistance kinase Lr10 {ECO:0000312|EMBL:AAC49629.1}; EC=2.7.11.1; AltName: Full=Probable receptor-like serine/threonine-protein kinase LRK10; Flags: Precursor;	A0A0D6QSA8_ARACU SubName: Full=Uncharacterized protein {ECO:0000313|EMBL:JAG93241.1};	Serine/threonine protein kinase	GO:0016021,integral component of membrane; GO:0005886,plasma membrane; GO:0005524,ATP binding; GO:0004674,protein serine/threonine kinase activity; GO:0000166,nucleotide binding; GO:0003674,molecular_function; GO:0005488,binding; GO:0008144,drug binding; GO:0017076,purine nucleotide binding; GO:0030554,adenyl nucleotide binding; GO:0032553,ribonucleotide binding; GO:0032555,purine ribonucleotide …	Protein tyrosine kinase	--	--	--
	Cluster-27241.100887	0	0.38	0.2	0.49	0.98	0.39	2.42	1.52	1.63	0	7.47	4	14.77	22.11	11.25	56.29	44.65	55.93	NA	NA	NA	NA	2.71579	0.00399358	0.0262666	up	-1.60888	0.00199504	0.00923705	down	3.32192	0.000622102	0.0031679	up	1369	K13416 brassinosteroid insensitive 1-associated receptor kinase 1 [EC:2.7.10.1 2.7.11.1] | (RefSeq) BRASSINOSTEROID INSENSITIVE 1-associated receptor kinase 1-like (A)	PREDICTED: cysteine-rich receptor-like protein kinase 2 [Pyrus x bretschneideri]	CRK2_ARATH RecName: Full=Cysteine-rich receptor-like protein kinase 2; Short=Cysteine-rich RLK2; EC=2.7.11.-; Flags: Precursor;	A0A0D6QS35_ARACU SubName: Full=Uncharacterized protein {ECO:0000313|EMBL:JAG93121.1};	--	GO:0016021,integral component of membrane; GO:0005886,plasma membrane; GO:0009506,plasmodesma; GO:0005524,ATP binding; GO:0004674,protein serine/threonine kinase activity; GO:0046777,protein autophosphorylation; GO:0010193,response to ozone; GO:0000166,nucleotide binding; GO:0003674,molecular_function; GO:0005488,binding; GO:0008144,drug binding; GO:0017076,purine nucleotide binding; GO:0030554,a…	Salt stress response/antifungal	--	--	--
	Cluster-27241.107646	0.12	0.31	0.21	1.22	0.9	0.84	2.41	2.02	2.06	2	3	2	18	9.9	11.92	27	29	34.85	NA	NA	NA	NA	2.88113	0.000107845	0.00143073	up	-1.12025	0.0144375	0.0507493	false	3.34897	1.02386e-05	7.47948e-05	up	NA	NA	NA	NA	NA	NA	NA	NA	NA	NA	NA
	Cluster-27241.2422	0.07	0	0.12	0	0	0	1.64	1.37	2.18	2	0	2	0	0	0	33	35	65	NA	NA	NA	NA	3.72828	0.0890741	0.233076	false	-7.7886	2.97142e-09	3.74902e-08	down	4.71669	2.17335e-07	2.09924e-06	up	1222	K13416 brassinosteroid insensitive 1-associated receptor kinase 1 [EC:2.7.10.1 2.7.11.1] | (RefSeq) BRASSINOSTEROID INSENSITIVE 1-associated receptor kinase 1-like isoform X1 (A)	unknown [Picea sitchensis]	Y5977_ARATH RecName: Full=Probable leucine-rich repeat receptor-like protein kinase At5g49770; EC=2.7.11.1; Flags: Precursor;	D5A9B2_PICSI SubName: Full=Uncharacterized protein {ECO:0000313|EMBL:ADE76131.1};	--	GO:0016021,integral component of membrane; GO:0005524,ATP binding; GO:0004674,protein serine/threonine kinase activity; GO:0000166,nucleotide binding; GO:0003674,molecular_function; GO:0005488,binding; GO:0008144,drug binding; GO:0017076,purine nucleotide binding; GO:0030554,adenyl nucleotide binding; GO:0032553,ribonucleotide binding; GO:0032555,purine ribonucleotide binding; GO:0032559,adenyl r…	Protein kinase domain	--	--	--
	Cluster-27241.39665	0	0	0	0	0.25	0.13	0.64	0.47	0.32	0.11	0	0	0	11.72	7.52	30.81	28.82	22.55	NA	NA	NA	NA	6.26621	0.000411853	0.00434883	up	-1.8931	0.0930526	0.226503	false	6.92353	9.79955e-07	8.50859e-06	up	2551	K13416 brassinosteroid insensitive 1-associated receptor kinase 1 [EC:2.7.10.1 2.7.11.1] | (RefSeq) BRASSINOSTEROID INSENSITIVE 1-associated receptor kinase 1-like isoform X1 (A)	unknown [Picea sitchensis]	Y5830_ARATH RecName: Full=Probable inactive receptor kinase At5g58300; Flags: Precursor;	A0A0C9S1N6_9SPER SubName: Full=TSA: Wollemia nobilis Ref_Wollemi_Transcript_25072_1671 transcribed RNA sequence {ECO:0000313|EMBL:JAG85727.1};	--	GO:0016021,integral component of membrane; GO:0005886,plasma membrane; GO:0005524,ATP binding; GO:0004672,protein kinase activity; GO:0000166,nucleotide binding; GO:0003674,molecular_function; GO:0005488,binding; GO:0008144,drug binding; GO:0017076,purine nucleotide binding; GO:0030554,adenyl nucleotide binding; GO:0032553,ribonucleotide binding; GO:0032555,purine ribonucleotide binding; GO:00325…	--	--	--	--
	Cluster-27241.5265	0.03	0.07	0.1	0.14	0.35	0.13	2.13	1.82	2.09	2	3	4	9.29	16.53	7.88	105	113	150.81	NA	NA	NA	NA	4.04734	0.000175973	0.00215695	up	-3.30947	3.92805e-13	8.10424e-12	down	5.00533	6.13474e-18	1.97481e-16	up	2598	K13416 brassinosteroid insensitive 1-associated receptor kinase 1 [EC:2.7.10.1 2.7.11.1] | (RefSeq) BRASSINOSTEROID INSENSITIVE 1-associated receptor kinase 1-like (A)	hypothetical protein AQUCO_02200288v1, partial [Aquilegia coerulea]	LRL24_ARATH RecName: Full=LEAF RUST 10 DISEASE-RESISTANCE LOCUS RECEPTOR-LIKE PROTEIN KINASE-like 2.4 {ECO:0000303|PubMed:12805585}; EC=2.7.11.1; AltName: Full=Probable receptor-like serine/threonine-protein kinase LRK10L-2.4 {ECO:0000305}; Flags: Precursor;	A0A0D6QU31_ARACU SubName: Full=Uncharacterized protein {ECO:0000313|EMBL:JAG93240.1};	--	GO:0016021,integral component of membrane; GO:0005524,ATP binding; GO:0004674,protein serine/threonine kinase activity; GO:0000166,nucleotide binding; GO:0003674,molecular_function; GO:0005488,binding; GO:0008144,drug binding; GO:0017076,purine nucleotide binding; GO:0030554,adenyl nucleotide binding; GO:0032553,ribonucleotide binding; GO:0032555,purine ribonucleotide binding; GO:0032559,adenyl r…	Protein tyrosine kinase	--	--	--
	Cluster-27241.52987	0.23	0.54	0.56	0.16	0.21	0.35	16.21	16.77	18.38	9.09	12.81	13.31	5.75	5.76	11.98	455.3	596.11	761.36	NA	NA	NA	NA	4.24121	0.00115025	0.00983414	up	-6.1407	1.57748e-70	5.14713e-68	down	5.31357	4.57988e-57	8.21611e-55	up	1598	K13416 brassinosteroid insensitive 1-associated receptor kinase 1 [EC:2.7.10.1 2.7.11.1] | (RefSeq) BRASSINOSTEROID INSENSITIVE 1-associated receptor kinase 1-like isoform X1 (A)	probable receptor-like protein kinase At1g11050 [Amborella trichopoda]	Y1105_ARATH RecName: Full=Probable receptor-like protein kinase At1g11050; EC=2.7.11.1; Flags: Precursor;	W1PM45_AMBTC SubName: Full=Uncharacterized protein {ECO:0000313|EMBL:ERN08751.1};	Serine/threonine protein kinase	GO:0016021,integral component of membrane; GO:0005886,plasma membrane; GO:0005524,ATP binding; GO:0004674,protein serine/threonine kinase activity; GO:0000166,nucleotide binding; GO:0003674,molecular_function; GO:0005488,binding; GO:0008144,drug binding; GO:0017076,purine nucleotide binding; GO:0030554,adenyl nucleotide binding; GO:0032553,ribonucleotide binding; GO:0032555,purine ribonucleotide …	Protein kinase domain	--	--	--
	Cluster-27241.81758	1.5	1.27	0.73	1.71	1.19	0.87	4.98	5.22	5.12	28	14	8	29	15	14	64	86	99	NA	NA	NA	NA	1.37134	0.0523912	0.163215	false	-2.02745	5.60005e-08	5.77187e-07	down	2.03719	2.55152e-07	2.43515e-06	up	NA	NA	NA	NA	NA	NA	NA	NA	NA	NA	NA
	Cluster-27241.52949	10.08	9.29	9.82	12.88	12.41	12.07	0	0	0	304.3	166.67	176.01	355	254.67	315.84	0	0	0	0.282656	0.00948355	0.0248297	false	-0.726534	0.756242	0.867572	false	10.7791	1.87475e-19	6.93225e-18	up	-10.4909	2.45882e-18	8.16697e-17	down	1267	K13416 brassinosteroid insensitive 1-associated receptor kinase 1 [EC:2.7.10.1 2.7.11.1] | (RefSeq) BRASSINOSTEROID INSENSITIVE 1-associated receptor kinase 1-like isoform X1 (A)	unknown [Picea sitchensis]	CRK6_ARATH RecName: Full=Cysteine-rich receptor-like protein kinase 6; Short=Cysteine-rich RLK6; EC=2.7.11.-; AltName: Full=Receptor-like protein kinase 5; Flags: Precursor;	A0A0D6QTZ7_ARACU SubName: Full=Uncharacterized protein {ECO:0000313|EMBL:JAG93205.1};	--	GO:0016021,integral component of membrane; GO:0005886,plasma membrane; GO:0005524,ATP binding; GO:0004672,protein kinase activity; GO:0004674,protein serine/threonine kinase activity; GO:0042742,defense response to bacterium; GO:0000302,response to reactive oxygen species; GO:0000166,nucleotide binding; GO:0003674,molecular_function; GO:0005488,binding; GO:0008144,drug binding; GO:0017076,purine …	Protein kinase domain	--	--	--
	Cluster-27241.67302	60.39	59.1	66.98	43.37	44.68	47.94	17.96	21.62	18.36	87	49.01	45	52	40	62	15.01	26	29	-0.460395	0.0720911	0.139864	false	-0.957649	0.0294486	0.110752	false	1.23618	0.00108887	0.00539215	up	-1.69119	1.25258e-06	1.06977e-05	down	NA	NA	NA	NA	NA	NA	NA	NA	NA	NA	NA
	Cluster-27241.79880	8.54	9.65	8.05	5.97	5.61	7.96	3	2.41	3.46	187.26	125.71	104.16	119.37	83.41	151.55	45.62	46.77	78.82	-0.486551	0.0169083	0.0410525	false	-0.957153	0.0166171	0.0741945	false	1.13249	0.00029239	0.00165094	up	-1.6165	5.59653e-10	7.93606e-09	down	NA	NA	NA	NA	NA	NA	NA	NA	NA	NA	NA
	Cluster-27241.95445	3.04	2.79	2.54	5.48	4.48	5.54	3.76	1.63	1.51	236.15	129.16	118.71	390.43	237.38	372.92	206.2	112.34	121.04	0.810904	4.93698e-09	3.7197e-08	false	0.336596	0.458038	0.654846	false	1.17317	0.00368477	0.0157678	up	-0.349787	0.407463	0.583634	false	NA	NA	NA	NA	NA	NA	NA	NA	NA	NA	NA
	Cluster-27241.55338	82.26	72.8	51.07	181.14	169.51	107.89	0	23.61	27.48	18	9	4	30.03	21	21.94	0	4	7	1.05371	0.0539337	0.11011	false	0.245788	0.819101	0.905005	false	2.89392	0.000624344	0.00328279	up	NA	NA	NA	NA	202	K13416 brassinosteroid insensitive 1-associated receptor kinase 1 [EC:2.7.10.1 2.7.11.1] | (RefSeq) BRASSINOSTEROID INSENSITIVE 1-associated receptor kinase 1-like (A)	hypothetical protein 0_8843_01, partial [Pinus taeda]	LRK10_WHEAT RecName: Full=Rust resistance kinase Lr10 {ECO:0000312|EMBL:AAC49629.1}; EC=2.7.11.1; AltName: Full=Probable receptor-like serine/threonine-protein kinase LRK10; Flags: Precursor;	H9VBE6_PINTA SubName: Full=Uncharacterized protein {ECO:0000313|EMBL:AFG47089.1}; Flags: Fragment;	Serine/threonine protein kinase	GO:0016021,integral component of membrane; GO:0005886,plasma membrane; GO:0005524,ATP binding; GO:0004674,protein serine/threonine kinase activity; GO:0000166,nucleotide binding; GO:0003674,molecular_function; GO:0005488,binding; GO:0008144,drug binding; GO:0017076,purine nucleotide binding; GO:0030554,adenyl nucleotide binding; GO:0032553,ribonucleotide binding; GO:0032555,purine ribonucleotide …	--	--	--	--
	Cluster-27241.87761	1.21	1.61	0.98	1.7	1.95	1.52	1.04	0.57	0.53	91	72	44	117	100	99	55	38	41	0.372582	0.118432	0.209979	false	-0.137942	0.775264	0.880074	false	1.28444	0.000495469	0.00266399	up	-0.90282	0.0365877	0.101321	false	NA	NA	NA	NA	NA	NA	NA	NA	NA	NA	NA
BRI1 kinase inhibitor 1	Cluster-27241.32748	3.15	2.99	3.66	5.91	6.63	5.82	2.16	2.11	2.63	131	74	91	225	188	210	63	78	113	0.836067	2.34623e-07	1.4065e-06	false	0.285775	0.528711	0.711859	false	1.40071	1.37345e-11	2.35863e-10	up	-0.565646	0.0231335	0.0700555	false	1650	K14499 BRI1 kinase inhibitor 1 | (RefSeq) BRI1 kinase inhibitor 1-like (A)	unknown [Picea sitchensis]	MAKR4_ARATH RecName: Full=Probable membrane-associated kinase regulator 4;	A9NWX2_PICSI SubName: Full=Uncharacterized protein {ECO:0000313|EMBL:ABK25133.1};	--	GO:0005886,plasma membrane; GO:0009506,plasmodesma; GO:0005575,cellular_component; GO:0016020,membrane; GO:0005623,cell; GO:0044464,cell part; GO:0071944,cell periphery; GO:0005911,cell-cell junction; GO:0030054,cell junction; GO:0055044,symplast	--	--	--	--
BR-signaling kinase	Cluster-27241.85473	11.34	10.74	13.63	29.95	26.88	29.24	5.4	10.76	9.43	234.57	131.87	166	564	377	525	77.39	196.84	202.48	1.20852	1.6034e-24	4.05421e-23	up	0.568043	0.294272	0.503013	false	1.73822	6.96585e-09	8.29009e-08	up	-0.538236	0.103575	0.22594	false	NA	NA	NA	NA	NA	NA	NA	NA	NA	NA	NA
	Cluster-27241.52655	1.22	1.99	0.89	0.88	0.6	0.42	1.24	1.31	1.1	86.14	83.81	37.89	57.19	29.15	25.87	61.81	82.17	80.48	-1.18061	0.00245074	0.0074888	down	-0.637008	0.150911	0.331271	false	-0.944424	0.0124435	0.0447765	false	-0.232782	0.554657	0.712938	false	2627	K14500 BR-signaling kinase [EC:2.7.11.1] | (RefSeq) probable serine/threonine-protein kinase At4g35230 (A)	unknown [Picea sitchensis]	BSK2_ARATH RecName: Full=Serine/threonine-protein kinase BSK2 {ECO:0000305}; EC=2.7.11.1 {ECO:0000305}; AltName: Full=Brassinosteroid-signaling kinase 2 {ECO:0000303|PubMed:18653891};	D5A9S6_PICSI SubName: Full=Uncharacterized protein {ECO:0000313|EMBL:ADE76295.1};	--	GO:0005886,plasma membrane; GO:0005524,ATP binding; GO:0004675,transmembrane receptor protein serine/threonine kinase activity; GO:0009742,brassinosteroid mediated signaling pathway; GO:0007166,cell surface receptor signaling pathway; GO:0006468,protein phosphorylation; GO:0000166,nucleotide binding; GO:0003674,molecular_function; GO:0005488,binding; GO:0008144,drug binding; GO:0017076,purine nuc…	Protein tyrosine kinase	--	--	--
	Cluster-27241.85472	17.32	22.19	16.54	0	0	0	5.26	16.28	16.83	364.43	277.13	205	0	0	0	76.61	303.16	367.52	-10.8275	9.96213e-20	1.93099e-18	down	-1.60034	0.486267	0.678019	false	-10.2299	1.40417e-14	3.33433e-13	down	-0.600933	0.190024	0.349385	false	NA	NA	NA	NA	NA	NA	NA	NA	NA	NA	NA
protein brassinosteroid insensitive 1	Cluster-27241.100785	1.39	1.39	1.49	5.39	4.86	5.15	4.97	3.41	4.28	138.45	82.76	89.42	492.79	330.95	444.07	350.06	301.95	440.13	1.78584	7.63983e-45	4.10226e-43	up	1.63994	1.5831e-20	3.49954e-18	up	0.282071	0.122952	0.27935	false	1.50282	1.88799e-11	3.20028e-10	up	3594	K13415 protein brassinosteroid insensitive 1 [EC:2.7.10.1 2.7.11.1] | (RefSeq) systemin receptor SR160 isoform X2 (A)	unknown [Picea sitchensis]	Y5838_ARATH RecName: Full=Probably inactive leucine-rich repeat receptor-like protein kinase At5g48380; Flags: Precursor;	B8LK76_PICSI SubName: Full=Uncharacterized protein {ECO:0000313|EMBL:ABR16056.1};	--	GO:0016021,integral component of membrane; GO:0005886,plasma membrane; GO:0009506,plasmodesma; GO:0005524,ATP binding; GO:0016301,kinase activity; GO:0004672,protein kinase activity; GO:0033612,receptor serine/threonine kinase binding; GO:0042742,defense response to bacterium; GO:0060548,negative regulation of cell death; GO:0031348,negative regulation of defense response; GO:0000166,nucleotide b…	Protein tyrosine kinase	--	--	--
	Cluster-27241.31820	0.51	0.95	0.8	2.17	1.9	2.1	1	1.03	0.95	34	38	32	133	87	122	47	61	66	1.41389	3.67685e-07	2.15274e-06	up	0.94887	0.023676	0.0953168	false	1.05056	7.33024e-06	5.51474e-05	up	0.34999	0.370009	0.548023	false	2499	K13415 protein brassinosteroid insensitive 1 [EC:2.7.10.1 2.7.11.1] | (RefSeq) uncharacterized protein LOC103413440 isoform X1 (A)	predicted protein [Physcomitrella patens]	SPL8_ARATH RecName: Full=Squamosa promoter-binding-like protein 8;	A9SU35_PHYPA SubName: Full=Predicted protein {ECO:0000313|EMBL:EDQ65313.1};	--	GO:0005737,cytoplasm; GO:0005634,nucleus; GO:0003677,DNA binding; GO:0046872,metal ion binding; GO:0048653,anther development; GO:0030154,cell differentiation; GO:0009554,megasporogenesis; GO:0009556,microsporogenesis; GO:0006355,regulation of transcription, DNA-templated; GO:0006351,transcription, DNA-templated; GO:0003674,molecular_function; GO:0003676,nucleic acid binding; GO:0005488,binding; …	SBP domain	SBP	TF	SBP
	Cluster-27241.33854	0.25	0.18	0.39	0.89	1.01	0.73	0.28	0.16	0.32	14	6	13	45	38	35	11	8	18	1.59776	0.000379513	0.00138161	up	0.948242	0.169567	0.355926	false	1.77871	0.000203609	0.00118707	up	NA	NA	NA	NA	2102	K13415 protein brassinosteroid insensitive 1 [EC:2.7.10.1 2.7.11.1] | (RefSeq) brassinosteroid LRR receptor kinase BRI1-like (A)	hypothetical protein SELMODRAFT_116152 [Selaginella moellendorffii]	Y4361_ARATH RecName: Full=Probable LRR receptor-like serine/threonine-protein kinase At4g36180; EC=2.7.11.1; Flags: Precursor;	D8SG88_SELML SubName: Full=Uncharacterized protein {ECO:0000313|EMBL:EFJ16647.1};	--	GO:0016021,integral component of membrane; GO:0005886,plasma membrane; GO:0005524,ATP binding; GO:0004674,protein serine/threonine kinase activity; GO:0000166,nucleotide binding; GO:0003674,molecular_function; GO:0005488,binding; GO:0008144,drug binding; GO:0017076,purine nucleotide binding; GO:0030554,adenyl nucleotide binding; GO:0032553,ribonucleotide binding; GO:0032555,purine ribonucleotide …	Protein kinase domain	--	--	--
	Cluster-27241.44826	0.5	0.32	0.35	1.42	1.05	1	1.31	0.4	0.69	24.53	9.49	10.47	64.37	35.38	42.59	45.4	17.33	35.02	1.48021	0.000233896	0.00088635	up	1.23577	0.0116169	0.0575095	false	0.557834	0.302581	0.518015	false	0.954201	0.146317	0.290224	false	1908	K13415 protein brassinosteroid insensitive 1 [EC:2.7.10.1 2.7.11.1] | (RefSeq) uncharacterized protein LOC103413440 isoform X1 (A)	unknown [Picea sitchensis]	DRL29_ARATH RecName: Full=Probable disease resistance protein At4g33300;	B8LKC3_PICSI SubName: Full=Uncharacterized protein {ECO:0000313|EMBL:ABR16103.1};	--	GO:0048046,apoplast; GO:0043531,ADP binding; GO:0005524,ATP binding; GO:0042742,defense response to bacterium; GO:0000166,nucleotide binding; GO:0003674,molecular_function; GO:0005488,binding; GO:0017076,purine nucleotide binding; GO:0030554,adenyl nucleotide binding; GO:0032553,ribonucleotide binding; GO:0032555,purine ribonucleotide binding; GO:0032559,adenyl ribonucleotide binding; GO:0036094,…	PB1 domain	--	--	--
	Cluster-27241.46260	0.68	0.59	0.87	1.9	1.8	1.08	2.07	1.6	1.18	21	11	16	54	38	29	45	44	38	1.08775	0.00927823	0.0243769	up	1.09339	0.00251692	0.0183477	up	-0.0239364	0.955264	0.980501	false	1.116	0.018871	0.0593546	false	1298	K13415 protein brassinosteroid insensitive 1 [EC:2.7.10.1 2.7.11.1] | (RefSeq) uncharacterized protein LOC103413440 isoform X1 (A)	unknown [Picea sitchensis]	DRL29_ARATH RecName: Full=Probable disease resistance protein At4g33300;	A0A0C9RGS0_9SPER SubName: Full=TSA: Wollemia nobilis Ref_Wollemi_Transcript_25735_2823 transcribed RNA sequence {ECO:0000313|EMBL:JAG85576.1};	--	GO:0048046,apoplast; GO:0043531,ADP binding; GO:0005524,ATP binding; GO:0042742,defense response to bacterium; GO:0000166,nucleotide binding; GO:0003674,molecular_function; GO:0005488,binding; GO:0017076,purine nucleotide binding; GO:0030554,adenyl nucleotide binding; GO:0032553,ribonucleotide binding; GO:0032555,purine ribonucleotide binding; GO:0032559,adenyl ribonucleotide binding; GO:0036094,…	NB-ARC domain	--	--	--
	Cluster-27241.2698	0.83	0.64	0.81	0.14	0.08	0.17	0.28	0.35	0.26	46	21	27	7	3	8	11	17	15	-2.61966	1.09011e-06	5.97694e-06	down	-1.90434	0.000101657	0.00136217	down	NA	NA	NA	NA	-1.42675	0.00193899	0.00861095	down	2113	K13415 protein brassinosteroid insensitive 1 [EC:2.7.10.1 2.7.11.1] | (RefSeq) protein BRASSINOSTEROID INSENSITIVE 1 (A)	unknown [Picea sitchensis]	BIR2_ARATH RecName: Full=Inactive LRR receptor-like serine/threonine-protein kinase BIR2 {ECO:0000305}; AltName: Full=Protein BAK1-INTERACTING RECEPTOR-LIKE KINASE 2 {ECO:0000303|PubMed:24388849}; Flags: Precursor;	A0A0D6QTC3_ARACU SubName: Full=Uncharacterized protein {ECO:0000313|EMBL:JAG94852.1};	--	GO:0009507,chloroplast; GO:0016021,integral component of membrane; GO:0016020,membrane; GO:0005886,plasma membrane; GO:0000166,nucleotide binding; GO:0006952,defense response; GO:1900425,negative regulation of defense response to bacterium; GO:0006468,protein phosphorylation; GO:1900150,regulation of defense response to fungus; GO:0003674,molecular_function; GO:0005488,binding; GO:0036094,small m…	Protein tyrosine kinase	--	--	--
	Cluster-27241.100931	0.56	0.75	0.98	1.49	1.07	1.34	2.47	1.96	2.04	46.65	37.11	49.15	114.27	60.82	97.05	145.65	145.67	176.46	0.721565	0.0121097	0.0307342	false	1.11833	0.0011946	0.0101497	up	-0.730181	0.00227409	0.0103669	false	1.453	6.60512e-06	5.00455e-05	up	3057	K13415 protein brassinosteroid insensitive 1 [EC:2.7.10.1 2.7.11.1] | (RefSeq) protein BRASSINOSTEROID INSENSITIVE 1-like (A)	probable LRR receptor-like serine/threonine-protein kinase At2g24230 isoform X1 [Amborella trichopoda]	CARLK_ARATH RecName: Full=Calmodulin-binding receptor kinase CaMRLK {ECO:0000305}; EC=2.7.11.1 {ECO:0000269|PubMed:14720124}; AltName: Full=Calmodulin-binding receptor-like kinase {ECO:0000303|PubMed:14720124}; Short=AtCaMRLK {ECO:0000303|PubMed:14720124}; AltName: Full=Protein MATERNAL EFFECT EMBRYO ARREST 62 {ECO:0000303|PubMed:15634699}; Flags: Precursor;	A0A0C9S600_9SPER SubName: Full=TSA: Wollemia nobilis Ref_Wollemi_Transcript_15883_2666 transcribed RNA sequence {ECO:0000313|EMBL:JAG86338.1};	--	GO:0016021,integral component of membrane; GO:0005886,plasma membrane; GO:0005524,ATP binding; GO:0005516,calmodulin binding; GO:0004672,protein kinase activity; GO:0009793,embryo development ending in seed dormancy; GO:0046777,protein autophosphorylation; GO:0009733,response to auxin; GO:0009625,response to insect; GO:0006970,response to osmotic stress; GO:0000166,nucleotide binding; GO:0003674,…	Protein tyrosine kinase	--	--	--
	Cluster-27241.105561	0	0	0	0	0	0	10	8.25	7.96	0	0	0	0	0	0	210	220	248	NA	NA	NA	NA	8.9123	0.00946513	0.0496692	up	-10.1838	3.354e-17	1.01365e-15	down	9.91439	2.66176e-16	7.41162e-15	up	NA	NA	NA	NA	NA	NA	NA	NA	NA	NA	NA
	Cluster-27241.110199	1.63	1.64	1.44	1.45	1.36	1.32	8.16	5.27	5.46	207	124	110	169	118	145	734	595	716	-0.265169	0.0762756	0.146573	false	1.21858	0.0519495	0.162181	false	-2.19798	7.09515e-21	2.92428e-19	down	1.93993	1.95479e-15	4.99857e-14	up	NA	NA	NA	NA	NA	NA	NA	NA	NA	NA	NA
	Cluster-27241.33257	1.12	1	1.48	2.19	2.06	2.09	8.78	3.81	4.21	112.74	60.09	90	203.03	142.14	182.61	627.35	342.15	439.1	0.750772	6.50903e-05	0.000272371	false	1.60778	0.00143723	0.0117577	up	-1.4061	0.000114525	0.000701257	down	2.15773	1.00208e-07	1.0294e-06	up	3642	K13415 protein brassinosteroid insensitive 1 [EC:2.7.10.1 2.7.11.1] | (RefSeq) uncharacterized protein LOC103413440 isoform X1 (A)	PREDICTED: squamosa promoter-binding-like protein 15 [Elaeis guineensis]	SPL16_ARATH RecName: Full=Squamosa promoter-binding-like protein 16; AltName: Full=SPL1-related protein 3;	A0A0C9S2R6_9SPER SubName: Full=TSA: Wollemia nobilis Ref_Wollemi_Transcript_18703_5262 transcribed RNA sequence {ECO:0000313|EMBL:JAG86202.1};	--	GO:0005634,nucleus; GO:0005886,plasma membrane; GO:0003700,DNA-binding transcription factor activity; GO:0046872,metal ion binding; GO:0044212,transcription regulatory region DNA binding; GO:0006355,regulation of transcription, DNA-templated; GO:0006351,transcription, DNA-templated; GO:0140110,transcription regulator activity; GO:0003674,molecular_function; GO:0005488,binding; GO:0043167,ion bind…	SBP domain	SBP	TF	SBP
	Cluster-27241.60921	0.29	0.21	0.28	0.2	0.43	0.41	1.94	0.65	0.62	17.82	7.58	10.47	11.45	18.28	21.83	84.59	35.52	39.74	NA	NA	NA	NA	1.37177	0.0594101	0.177621	false	-1.63996	0.0157125	0.0545028	false	1.97854	0.00297667	0.0124503	up	2332	K13415 protein brassinosteroid insensitive 1 [EC:2.7.10.1 2.7.11.1] | (RefSeq) uncharacterized protein LOC103413440 isoform X1 (A)	unknown [Picea sitchensis]	DRL29_ARATH RecName: Full=Probable disease resistance protein At4g33300;	B8LKC3_PICSI SubName: Full=Uncharacterized protein {ECO:0000313|EMBL:ABR16103.1};	--	GO:0048046,apoplast; GO:0043531,ADP binding; GO:0005524,ATP binding; GO:0042742,defense response to bacterium; GO:0000166,nucleotide binding; GO:0003674,molecular_function; GO:0005488,binding; GO:0017076,purine nucleotide binding; GO:0030554,adenyl nucleotide binding; GO:0032553,ribonucleotide binding; GO:0032555,purine ribonucleotide binding; GO:0032559,adenyl ribonucleotide binding; GO:0036094,…	NB-ARC domain	--	--	--
	Cluster-27241.63024	0.26	0.17	0.41	0.6	0.39	0.3	2.53	0.57	1.09	28.46	11.38	27.12	61.76	29.38	28.67	198.92	56.18	125.18	0.577981	0.209103	0.328778	false	1.65386	0.021267	0.0884968	false	-1.69889	0.00628977	0.0249151	down	2.28063	0.000641689	0.00325513	up	3980	K13415 protein brassinosteroid insensitive 1 [EC:2.7.10.1 2.7.11.1] | (RefSeq) brassinosteroid LRR receptor kinase BRI1 (A)	leucine-rich repeat receptor-like protein kinase [Pohlia nutans]	Y2165_ARATH RecName: Full=Probable LRR receptor-like serine/threonine-protein kinase At2g16250; EC=2.7.11.1; Flags: Precursor;	A0A1P8DZ09_9BRYO SubName: Full=Leucine-rich repeat receptor-like protein kinase {ECO:0000313|EMBL:APU94884.1};	--	GO:0016021,integral component of membrane; GO:0009505,plant-type cell wall; GO:0005886,plasma membrane; GO:0009506,plasmodesma; GO:0005524,ATP binding; GO:0004674,protein serine/threonine kinase activity; GO:0000166,nucleotide binding; GO:0003674,molecular_function; GO:0005488,binding; GO:0008144,drug binding; GO:0017076,purine nucleotide binding; GO:0030554,adenyl nucleotide binding; GO:0032553,…	Leucine rich repeat	--	--	--
	Cluster-27241.72240	0.33	0.52	0.45	0.53	0.38	0.39	1.01	1.35	1.1	18.76	17.59	15.09	27.36	14.53	19.24	39.97	67.32	64.32	NA	NA	NA	NA	0.789784	0.152168	0.332837	false	-1.4094	0.000230489	0.00132802	down	1.34747	0.00128773	0.00600198	up	NA	NA	NA	NA	NA	NA	NA	NA	NA	NA	NA
	Cluster-27241.90198	6.35	6.11	6.48	7.66	7.48	7.06	18.8	13.58	12.55	643.54	368.62	394.88	712.24	517.62	619.33	1345.08	1221.82	1310.82	0.154252	0.0433977	0.0917796	false	0.748808	0.026777	0.103924	false	-1.02031	1.46081e-07	1.415e-06	down	1.17917	7.74051e-09	9.421e-08	up	NA	NA	NA	NA	NA	NA	NA	NA	NA	NA	NA
	Cluster-27241.37697	1.7	2.26	2.01	2.33	2.04	1.93	0.77	0.3	0.67	44.37	35	31	55.34	36.05	43.49	14	7	18	0.0143661	0.961709	0.977592	false	-0.658535	0.29974	0.508701	false	1.85366	0.000135637	0.000817467	up	-1.84638	0.000411764	0.00218698	down	1128	K13415 protein brassinosteroid insensitive 1 [EC:2.7.10.1 2.7.11.1] | (RefSeq) systemin receptor SR160-like (A)	LRK1 [Pinus tabuliformis]	Y1677_ARATH RecName: Full=Probable LRR receptor-like serine/threonine-protein kinase At1g67720; EC=2.7.11.1; Flags: Precursor;	A0A0D6QTN4_ARACU SubName: Full=Uncharacterized protein {ECO:0000313|EMBL:JAG93070.1};	--	GO:0016021,integral component of membrane; GO:0005524,ATP binding; GO:0004674,protein serine/threonine kinase activity; GO:0000166,nucleotide binding; GO:0003674,molecular_function; GO:0005488,binding; GO:0008144,drug binding; GO:0017076,purine nucleotide binding; GO:0030554,adenyl nucleotide binding; GO:0032553,ribonucleotide binding; GO:0032555,purine ribonucleotide binding; GO:0032559,adenyl r…	Protein tyrosine kinase	--	--	--
	Cluster-27241.52944	11.22	9.82	13.26	13.12	12.58	11.7	0	0	0	427.47	222.48	301	457.36	326.19	386.39	0	0	0	0.0544268	0.654045	0.763966	false	-0.95995	0.687246	0.823731	false	11.1153	1.17368e-20	4.78141e-19	up	-11.0597	4.86348e-20	1.85103e-18	down	1532	K13415 protein brassinosteroid insensitive 1 [EC:2.7.10.1 2.7.11.1] | (RefSeq) protein BRASSINOSTEROID INSENSITIVE 1-like (A)	unknown [Picea sitchensis]	CRK8_ARATH RecName: Full=Cysteine-rich receptor-like protein kinase 8; Short=Cysteine-rich RLK8; EC=2.7.11.-; Flags: Precursor;	A0A0D6QTZ7_ARACU SubName: Full=Uncharacterized protein {ECO:0000313|EMBL:JAG93205.1};	--	GO:0016021,integral component of membrane; GO:0005886,plasma membrane; GO:0005524,ATP binding; GO:0004674,protein serine/threonine kinase activity; GO:0042742,defense response to bacterium; GO:0006468,protein phosphorylation; GO:0000166,nucleotide binding; GO:0003674,molecular_function; GO:0005488,binding; GO:0008144,drug binding; GO:0017076,purine nucleotide binding; GO:0030554,adenyl nucleotide…	Protein tyrosine kinase	--	--	--
	Cluster-27241.36308	3.16	2.98	3.05	4.61	5.42	5.26	2.96	2.05	2.14	233.99	131.61	135.53	313.14	273.75	337.34	154.79	135.08	163.37	0.653769	6.69304e-07	3.78334e-06	false	0.204152	0.580809	0.750629	false	1.09894	9.00361e-07	7.78215e-06	up	-0.436437	0.0609469	0.15069	false	2737	K13415 protein brassinosteroid insensitive 1 [EC:2.7.10.1 2.7.11.1] | (RefSeq) uncharacterized protein LOC103413440 isoform X1 (A)	SPL1 [Pinus tabuliformis]	SPL12_ORYSJ RecName: Full=Squamosa promoter-binding-like protein 12;	A0A0K0M756_PINTB SubName: Full=SPL1 {ECO:0000313|EMBL:AJP06353.1};	--	GO:0005634,nucleus; GO:0003677,DNA binding; GO:0046872,metal ion binding; GO:0006355,regulation of transcription, DNA-templated; GO:0006351,transcription, DNA-templated; GO:0003674,molecular_function; GO:0003676,nucleic acid binding; GO:0005488,binding; GO:0097159,organic cyclic compound binding; GO:1901363,heterocyclic compound binding; GO:0043167,ion binding; GO:0043169,cation binding; GO:00081…	SBP domain	SBP	TF	SBP
	Cluster-27241.26077	0.43	0.42	0.51	0.32	0.38	0.28	1.18	0.62	0.52	46	27	33	32	28	26	90	59	58	-0.543018	0.106794	0.193188	false	0.204649	0.689111	0.825017	false	-1.23986	0.00795679	0.0305335	down	0.704415	0.127431	0.262703	false	3861	K13415 protein brassinosteroid insensitive 1 [EC:2.7.10.1 2.7.11.1] | (RefSeq) brassinosteroid LRR receptor kinase BRI1 (A)	PREDICTED: MDIS1-interacting receptor like kinase 2-like [Nelumbo nucifera]	MIK2_ARATH RecName: Full=MDIS1-interacting receptor like kinase 2 {ECO:0000303|PubMed:26863186}; Short=AtMIK2 {ECO:0000303|PubMed:26863186}; AltName: Full=Probable LRR receptor-like serine/threonine-protein kinase At4g08850; EC=2.7.11.1 {ECO:0000305}; Flags: Precursor;	A0A0D6QS44_ARACU SubName: Full=Uncharacterized protein {ECO:0000313|EMBL:JAG93136.1};	--	GO:0016021,integral component of membrane; GO:0016020,membrane; GO:0005886,plasma membrane; GO:0009506,plasmodesma; GO:0090406,pollen tube; GO:0005524,ATP binding; GO:0004674,protein serine/threonine kinase activity; GO:0000166,nucleotide binding; GO:0003674,molecular_function; GO:0005488,binding; GO:0008144,drug binding; GO:0017076,purine nucleotide binding; GO:0030554,adenyl nucleotide binding;…	Leucine rich repeat	--	--	--
	Cluster-27241.33258	0.16	0.22	0	0.12	0.15	0.17	0.98	0.57	0.44	17.26	13.91	0	11.97	10.86	15.62	74.86	54.85	48.84	NA	NA	NA	NA	1.63031	0.102786	0.256531	false	-2.17304	3.15024e-05	0.000214308	down	2.34851	0.0162557	0.052441	false	3880	K13415 protein brassinosteroid insensitive 1 [EC:2.7.10.1 2.7.11.1] | (RefSeq) uncharacterized protein LOC103413440 isoform X1 (A)	Transcription factor [Macleaya cordata]	SPL15_ORYSI RecName: Full=Squamosa promoter-binding-like protein 15;	A0A0D6QW43_ARACU SubName: Full=Uncharacterized protein {ECO:0000313|EMBL:JAG94764.1};	--	GO:0005634,nucleus; GO:0003677,DNA binding; GO:0046872,metal ion binding; GO:0006355,regulation of transcription, DNA-templated; GO:0006351,transcription, DNA-templated; GO:0003674,molecular_function; GO:0003676,nucleic acid binding; GO:0005488,binding; GO:0097159,organic cyclic compound binding; GO:1901363,heterocyclic compound binding; GO:0043167,ion binding; GO:0043169,cation binding; GO:00081…	SBP domain	SBP	TF	SBP
	Cluster-27241.68063	0.59	1.63	0.46	0.83	0.67	1.41	3.05	1.72	1.62	80.38	133.4	38.3	105.27	62.39	167.68	296.08	209.3	229.26	0.0620749	0.894762	0.93635	false	0.72803	0.19854	0.394014	false	-1.12586	0.00821964	0.0314395	down	1.19517	0.0321357	0.0914022	false	NA	NA	NA	NA	NA	NA	NA	NA	NA	NA	NA
	Cluster-27241.72990	0	0	0.84	0	0	0	0	0.81	1.02	0	0	45.9	0	0	0	0	65.52	96.27	NA	NA	NA	NA	0.0426152	0.989487	0.995188	false	-7.9607	0.000652773	0.00341647	down	1.03365	0.781811	0.875816	false	NA	NA	NA	NA	NA	NA	NA	NA	NA	NA	NA
xyloglucan:xyloglucosyl transferase TCH4	Cluster-27241.113900	0.66	1.39	0.31	0.91	1	0.45	1.54	4.37	2.79	8.48	10.55	2.34	10.54	8.69	5	13.54	49.56	37.39	NA	NA	NA	NA	1.21018	0.161635	0.345807	false	-1.8868	0.00609338	0.0242874	down	1.86653	0.0221208	0.0675169	false	NA	NA	NA	NA	NA	NA	NA	NA	NA	NA	NA
arabidopsis histidine kinase 2/3/4 (cytokinin receptor)	Cluster-27241.92395	1.54	0.62	1.2	0.46	0.29	0.42	0.2	0.81	0.86	70.48	16.97	32.79	19.13	9.18	16.83	6.31	33.02	40.88	-1.59454	0.000768917	0.00263396	down	-1.20726	0.0359049	0.126641	false	-0.688952	0.351137	0.569064	false	-0.903821	0.202238	0.364916	false	NA	NA	NA	NA	NA	NA	NA	NA	NA	NA	NA
histidine-containing phosphotransfer peotein	Cluster-27241.57149	1.49	1	1.08	3.08	3.06	2.88	6.08	1.76	2	37.95	15.08	16.26	71.45	52.83	63.36	107.51	39.49	52.75	1.23706	8.93589e-05	0.000364866	up	1.31112	0.00438289	0.0282597	up	-0.116283	0.836796	0.922066	false	1.39126	0.0295424	0.0853584	false	1107	K14490 histidine-containing phosphotransfer peotein | (RefSeq) histidine-containing phosphotransfer protein 1-like (A)	unknown [Picea sitchensis]	AHP3_ARATH RecName: Full=Histidine-containing phosphotransfer protein 3;	D5A9X4_PICSI SubName: Full=Uncharacterized protein {ECO:0000313|EMBL:ADE76343.1};	Two-component phosphorelay intermediate involved in MAP kinase cascade regulation	GO:0005737,cytoplasm; GO:0005829,cytosol; GO:0005634,nucleus; GO:0009927,histidine phosphotransfer kinase activity; GO:0043424,protein histidine kinase binding; GO:0009557,antipodal cell differentiation; GO:0009736,cytokinin-activated signaling pathway; GO:0009560,embryo sac egg cell differentiation; GO:0000160,phosphorelay signal transduction system; GO:0003674,molecular_function; GO:0003824,cat…	--	--	--	--
	Cluster-17792.1	3.12	2.25	3.51	1.04	0.9	0.77	1.05	2.14	2.01	56	24	37	17	11	12	13	34	37.56	-1.78009	1.46446e-05	6.79617e-05	down	-1.21632	0.00839631	0.0457116	down	-0.967319	0.0796022	0.201198	false	-0.810579	0.0866584	0.198066	false	858	K14490 histidine-containing phosphotransfer peotein | (RefSeq) histidine-containing phosphotransfer protein 1 (A)	unknown [Picea sitchensis]	AHP1_ARATH RecName: Full=Histidine-containing phosphotransfer protein 1;	A0A0C9S635_9SPER SubName: Full=TSA: Wollemia nobilis Ref_Wollemi_Transcript_15662_1000 transcribed RNA sequence {ECO:0000313|EMBL:JAG86388.1};	Two-component phosphorelay intermediate involved in MAP kinase cascade regulation	GO:0005737,cytoplasm; GO:0005829,cytosol; GO:0005634,nucleus; GO:0009927,histidine phosphotransfer kinase activity; GO:0043424,protein histidine kinase binding; GO:0009736,cytokinin-activated signaling pathway; GO:0000160,phosphorelay signal transduction system; GO:0003674,molecular_function; GO:0003824,catalytic activity; GO:0004672,protein kinase activity; GO:0016301,kinase activity; GO:0016740…	Hpt domain	--	--	--
	Cluster-27241.76134	15.27	15.88	12.77	19.73	18.1	16.45	7.39	8.48	10.23	326.76	201.76	161.03	384.48	262.68	305.58	109.54	160.62	227.22	0.232038	0.0583959	0.117485	false	-0.204131	0.561679	0.737311	false	1.04194	1.35897e-07	1.32546e-06	up	-0.807159	0.000207205	0.00117384	false	NA	NA	NA	NA	NA	NA	NA	NA	NA	NA	NA
	Cluster-27241.76136	0.89	0.5	0.7	0.84	0.59	0.8	0.26	0.12	0.23	36.24	12.24	16.97	31.52	16.32	28.42	7.46	4.38	9.78	0.0168984	0.969107	0.982093	false	-0.644799	0.350892	0.560111	false	1.91893	0.00162961	0.00771229	up	NA	NA	NA	NA	NA	NA	NA	NA	NA	NA	NA	NA	NA	NA	NA
two-component response regulator ARR-B family	Cluster-27241.48452	0.27	0.24	0.1	1.61	1.14	0.86	0.86	0	0.39	21.56	11.65	5.09	119.45	63.27	60.7	49.27	0	32.52	2.42469	6.3462e-09	4.69788e-08	up	1.87483	0.0752361	0.208513	false	1.53423	0.200698	0.39639	false	0.936223	0.500894	0.669239	false	2971	K14491 two-component response regulator ARR-B family | (RefSeq) two-component response regulator ARR2-like (A)	unknown [Picea sitchensis]	APRR2_ARATH RecName: Full=Two-component response regulator-like APRR2; AltName: Full=Pseudo-response regulator 2; AltName: Full=TOC2 protein;	C0PRL2_PICSI SubName: Full=Uncharacterized protein {ECO:0000313|EMBL:ACN40452.1};	GATA-4/5/6 transcription factors	GO:0005634,nucleus; GO:0003677,DNA binding; GO:0003700,DNA-binding transcription factor activity; GO:0000160,phosphorelay signal transduction system; GO:0006351,transcription, DNA-templated; GO:0003674,molecular_function; GO:0003676,nucleic acid binding; GO:0005488,binding; GO:0097159,organic cyclic compound binding; GO:1901363,heterocyclic compound binding; GO:0140110,transcription regulator act…	Response regulator receiver domain	Others	TR	Others
	Cluster-27241.49384	0.57	0.47	0.5	6.36	5.62	5.88	13.57	12.58	13.83	48	23.62	25	488.39	321.17	425.8	801.1	935.13	1194.3	3.43297	1.48297e-77	1.50889e-75	up	4.14217	8.44849e-25	2.81692e-22	up	-1.1657	9.17256e-28	6.19218e-26	down	4.60492	6.23245e-121	5.50438e-118	up	3058	K14491 two-component response regulator ARR-B family | (RefSeq) two-component response regulator ORR21 isoform X1 (A)	hypothetical protein AXG93_3228s1230 [Marchantia polymorpha subsp. ruderalis]	ORR22_ORYSI RecName: Full=Two-component response regulator ORR22 {ECO:0000305};	A0A0C9RV56_9SPER SubName: Full=TSA: Wollemia nobilis Ref_Wollemi_Transcript_11459_2238 transcribed RNA sequence {ECO:0000313|EMBL:JAG87734.1};	GATA-4/5/6 transcription factors	GO:0005634,nucleus; GO:0003700,DNA-binding transcription factor activity; GO:0043565,sequence-specific DNA binding; GO:0009736,cytokinin-activated signaling pathway; GO:0000160,phosphorelay signal transduction system; GO:0045893,positive regulation of transcription, DNA-templated; GO:0006351,transcription, DNA-templated; GO:0140110,transcription regulator activity; GO:0003674,molecular_function; …	Response regulator receiver domain	GARP-ARR-B	TF	GARP->GARP-ARR-B
	Cluster-27241.56045	1.7	2.25	2.44	6.27	5.48	4.34	6.23	2.65	1.96	125.36	98.64	107.78	423.43	275.18	276.31	323.33	173.31	148.72	1.2648	3.85998e-11	3.71124e-10	up	0.987633	0.0132424	0.0631898	false	0.567237	0.215969	0.416711	false	0.692153	0.15957	0.308694	false	2721	K14491 two-component response regulator ARR-B family | (RefSeq) two-component response regulator ARR2-like (A)	unknown [Picea sitchensis]	GLK1_ORYSJ RecName: Full=Probable transcription factor GLK1; AltName: Full=Golden2-like protein 1; Short=OsGLK1;	C0PRL2_PICSI SubName: Full=Uncharacterized protein {ECO:0000313|EMBL:ACN40452.1};	GATA-4/5/6 transcription factors	GO:0005634,nucleus; GO:0003677,DNA binding; GO:0010638,positive regulation of organelle organization; GO:0045893,positive regulation of transcription, DNA-templated; GO:0006351,transcription, DNA-templated; GO:0003674,molecular_function; GO:0003676,nucleic acid binding; GO:0005488,binding; GO:0097159,organic cyclic compound binding; GO:1901363,heterocyclic compound binding; GO:0006996,organelle o…	Response regulator receiver domain	GARP-ARR-B	TF	GARP->GARP-ARR-B
	Cluster-27241.59242	0.19	0.03	0.04	0.51	0.3	0.39	1.09	0.7	0.95	14.47	1.32	1.71	35.91	15.9	25.69	58.84	47.66	75.15	2.11405	0.00704545	0.0191323	up	2.82644	8.66375e-05	0.00119204	up	-1.17254	0.00281827	0.0125111	down	3.29992	1.46813e-05	0.000104351	up	2822	K14491 two-component response regulator ARR-B family | (RefSeq) two-component response regulator ORR23 (A)	unknown [Picea sitchensis]	ORR23_ORYSI RecName: Full=Two-component response regulator ORR23 {ECO:0000305};	D5A9D6_PICSI SubName: Full=Uncharacterized protein {ECO:0000313|EMBL:ADE76155.1};	GATA-4/5/6 transcription factors	GO:0005634,nucleus; GO:0003677,DNA binding; GO:0003700,DNA-binding transcription factor activity; GO:0009736,cytokinin-activated signaling pathway; GO:0000160,phosphorelay signal transduction system; GO:0006351,transcription, DNA-templated; GO:0003674,molecular_function; GO:0003676,nucleic acid binding; GO:0005488,binding; GO:0097159,organic cyclic compound binding; GO:1901363,heterocyclic compou…	Response regulator receiver domain	Others	TR	Others
	Cluster-27241.37976	0	0.07	0	0.27	0.16	0.07	0.82	1.19	0.93	0	1.38	0	8.61	3.83	2.2	19.9	36.87	33.7	NA	NA	NA	NA	5.24688	0.000716377	0.00678779	up	-2.52742	0.000274014	0.00155717	down	6.0232	6.89712e-06	5.20404e-05	up	1425	K14491 two-component response regulator ARR-B family | (RefSeq) two-component response regulator ARR11-like isoform X1 (A)	hypothetical protein AXG93_3228s1230 [Marchantia polymorpha subsp. ruderalis]	ARR11_ARATH RecName: Full=Two-component response regulator ARR11; AltName: Full=Receiver-like protein 3;	A0A0D6R466_ARACU SubName: Full=Uncharacterized protein {ECO:0000313|EMBL:JAG97063.1};	GATA-4/5/6 transcription factors	GO:0005634,nucleus; GO:0003677,DNA binding; GO:0003700,DNA-binding transcription factor activity; GO:0000156,phosphorelay response regulator activity; GO:0009736,cytokinin-activated signaling pathway; GO:0010082,regulation of root meristem growth; GO:0009735,response to cytokinin; GO:0006351,transcription, DNA-templated; GO:0003674,molecular_function; GO:0003676,nucleic acid binding; GO:0005488,b…	Response regulator receiver domain	Others	TR	Others
	Cluster-27241.56046	0.21	0.02	0	0	0.57	0.11	0.87	0.82	0.29	16.21	1.09	0	0	29.87	7.12	47.18	56.25	23.05	NA	NA	NA	NA	2.4382	0.093938	0.241685	false	-1.55806	0.241437	0.447838	false	2.98728	0.012496	0.0420901	up	2841	K14491 two-component response regulator ARR-B family | (RefSeq) two-component response regulator ARR2-like (A)	unknown [Picea sitchensis]	APRR2_ARATH RecName: Full=Two-component response regulator-like APRR2; AltName: Full=Pseudo-response regulator 2; AltName: Full=TOC2 protein;	C0PRL2_PICSI SubName: Full=Uncharacterized protein {ECO:0000313|EMBL:ACN40452.1};	GATA-4/5/6 transcription factors	GO:0005634,nucleus; GO:0003677,DNA binding; GO:0003700,DNA-binding transcription factor activity; GO:0000160,phosphorelay signal transduction system; GO:0006351,transcription, DNA-templated; GO:0003674,molecular_function; GO:0003676,nucleic acid binding; GO:0005488,binding; GO:0097159,organic cyclic compound binding; GO:1901363,heterocyclic compound binding; GO:0140110,transcription regulator act…	Response regulator receiver domain	GARP-ARR-B	TF	GARP->GARP-ARR-B
	Cluster-27241.59237	0.84	1.45	1	1.39	1.94	0.86	4.15	2.42	2.28	77.51	79.77	55.74	118.26	122.44	69.13	270.74	198.64	217.63	0.265964	0.426722	0.565856	false	0.905167	0.0549321	0.168381	false	-1.08996	0.00735394	0.028512	down	1.36121	0.00035487	0.00191495	up	3350	K14491 two-component response regulator ARR-B family | (RefSeq) two-component response regulator ORR23 (A)	unknown [Picea sitchensis]	ORR23_ORYSI RecName: Full=Two-component response regulator ORR23 {ECO:0000305};	D5A9D6_PICSI SubName: Full=Uncharacterized protein {ECO:0000313|EMBL:ADE76155.1};	GATA-4/5/6 transcription factors	GO:0005634,nucleus; GO:0003677,DNA binding; GO:0003700,DNA-binding transcription factor activity; GO:0009736,cytokinin-activated signaling pathway; GO:0000160,phosphorelay signal transduction system; GO:0006351,transcription, DNA-templated; GO:0003674,molecular_function; GO:0003676,nucleic acid binding; GO:0005488,binding; GO:0097159,organic cyclic compound binding; GO:1901363,heterocyclic compou…	Myb-like DNA-binding domain	GARP-G2-like	TF	GARP->GARP-G2-like
	Cluster-27241.59239	1.83	2.9	2.02	4.85	3.45	3.85	10.68	5.38	7.6	135.33	127.75	89.62	328.95	174.32	246.91	557.25	353.3	580.17	0.784143	0.000200803	0.000769727	false	1.32857	0.000663618	0.00639763	up	-0.960979	0.00135712	0.00654398	false	1.74212	3.49225e-07	3.25716e-06	up	2734	K14491 two-component response regulator ARR-B family | (RefSeq) two-component response regulator ORR23 (A)	unknown [Picea sitchensis]	ORR23_ORYSI RecName: Full=Two-component response regulator ORR23 {ECO:0000305};	D5A9D6_PICSI SubName: Full=Uncharacterized protein {ECO:0000313|EMBL:ADE76155.1};	GATA-4/5/6 transcription factors	GO:0005634,nucleus; GO:0003677,DNA binding; GO:0003700,DNA-binding transcription factor activity; GO:0009736,cytokinin-activated signaling pathway; GO:0000160,phosphorelay signal transduction system; GO:0006351,transcription, DNA-templated; GO:0003674,molecular_function; GO:0003676,nucleic acid binding; GO:0005488,binding; GO:0097159,organic cyclic compound binding; GO:1901363,heterocyclic compou…	Response regulator receiver domain	Others	TR	Others
	Cluster-27241.59241	0.01	0.11	0.01	0	0	0.22	0.78	0.14	0.38	0.75	5.14	0.64	0	0	15.38	44.96	10.06	31.68	NA	NA	NA	NA	2.42582	0.134152	0.306252	false	-2.56582	0.130191	0.291215	false	3.25197	0.00387033	0.0156412	up	2980	K14491 two-component response regulator ARR-B family | (RefSeq) two-component response regulator ORR23 (A)	unknown [Picea sitchensis]	ORR23_ORYSI RecName: Full=Two-component response regulator ORR23 {ECO:0000305};	D5A9D6_PICSI SubName: Full=Uncharacterized protein {ECO:0000313|EMBL:ADE76155.1};	GATA-4/5/6 transcription factors	GO:0005634,nucleus; GO:0003677,DNA binding; GO:0003700,DNA-binding transcription factor activity; GO:0009736,cytokinin-activated signaling pathway; GO:0000160,phosphorelay signal transduction system; GO:0006351,transcription, DNA-templated; GO:0003674,molecular_function; GO:0003676,nucleic acid binding; GO:0005488,binding; GO:0097159,organic cyclic compound binding; GO:1901363,heterocyclic compou…	Response regulator receiver domain	GARP-ARR-B	TF	GARP->GARP-ARR-B
	Cluster-27241.59243	20.39	19.32	21.17	34.6	35.88	33.64	56.95	57.8	56.15	1283.4	723.81	798.45	1996.89	1540.33	1833.22	2523.96	3229.99	3649.62	0.700941	8.55195e-35	3.39692e-33	false	1.10178	3.70576e-06	7.88674e-05	up	-0.720889	1.6229e-20	6.53591e-19	false	1.42512	1.20465e-56	2.12784e-54	up	2364	K14491 two-component response regulator ARR-B family | (RefSeq) two-component response regulator ORR23 (A)	unknown [Picea sitchensis]	ORR23_ORYSI RecName: Full=Two-component response regulator ORR23 {ECO:0000305};	D5A9D6_PICSI SubName: Full=Uncharacterized protein {ECO:0000313|EMBL:ADE76155.1};	GATA-4/5/6 transcription factors	GO:0005634,nucleus; GO:0003677,DNA binding; GO:0003700,DNA-binding transcription factor activity; GO:0009736,cytokinin-activated signaling pathway; GO:0000160,phosphorelay signal transduction system; GO:0006351,transcription, DNA-templated; GO:0003674,molecular_function; GO:0003676,nucleic acid binding; GO:0005488,binding; GO:0097159,organic cyclic compound binding; GO:1901363,heterocyclic compou…	Response regulator receiver domain	GARP-ARR-B	TF	GARP->GARP-ARR-B
ethylene receptor	Cluster-27241.31724	0.74	0	0.44	1.33	1.74	1.68	0.2	0	1.04	30.57	0	10.91	50.17	48.86	60.3	5.74	0	44.58	1.88121	0.00840277	0.0223506	up	1.24517	0.365466	0.573569	false	1.91095	0.118919	0.272275	false	0.00287445	0.998802	0.999324	false	1640	K14509 ethylene receptor [EC:2.7.13.-] | (RefSeq) ethylene receptor 1-like isoform X1 (A)	ETR4 ethylene receptor protein [Physcomitrella patens]	ETR1_BRAOL RecName: Full=Ethylene receptor 1; EC=2.7.13.3;	A9T0F5_PHYPA SubName: Full=ETR4 ethylene receptor protein {ECO:0000313|EMBL:EDQ63131.1};	Sensory transduction histidine kinase	GO:0005789,endoplasmic reticulum membrane; GO:0016021,integral component of membrane; GO:0005524,ATP binding; GO:0051740,ethylene binding; GO:0038199,ethylene receptor activity; GO:0042802,identical protein binding; GO:0046872,metal ion binding; GO:0000155,phosphorelay sensor kinase activity; GO:0051301,cell division; GO:0071281,cellular response to iron ion; GO:0009690,cytokinin metabolic proces…	Histidine kinase-, DNA gyrase B-, and HSP90-like ATPase	--	--	--
ethylene-insensitive protein 3	Cluster-27241.64048	0.06	0	0	0.19	0.47	0.27	0.35	0.2	0.22	8.89	0	0	25.76	47.36	34.19	35.88	25.61	33.62	3.64432	0.000120228	0.000479582	up	3.4943	2.30368e-05	0.000386663	up	0.267701	0.612268	0.785024	false	3.46142	0.00551496	0.0211605	up	5159	K14514 ethylene-insensitive protein 3 | (RefSeq) ETHYLENE INSENSITIVE 3-like 1 protein (A)	PREDICTED: ETHYLENE INSENSITIVE 3-like 1 protein [Pyrus x bretschneideri]	EIN3_ARATH RecName: Full=Protein ETHYLENE INSENSITIVE 3;	A0A0C9RQ59_9SPER SubName: Full=TSA: Wollemia nobilis Ref_Wollemi_Transcript_3637_3249 transcribed RNA sequence {ECO:0000313|EMBL:JAG89162.1}; SubName: Full=TSA: Wollemia nobilis Ref_Wollemi_Transcript_3638_3304 transcribed RNA sequence {ECO:0000313|EMBL:JAG89161.1};	--	GO:0005634,nucleus; GO:0003700,DNA-binding transcription factor activity; GO:0044212,transcription regulatory region DNA binding; GO:0000976,transcription regulatory region sequence-specific DNA binding; GO:0071281,cellular response to iron ion; GO:0042742,defense response to bacterium; GO:0009873,ethylene-activated signaling pathway; GO:0006355,regulation of transcription, DNA-templated; GO:0009…	NPH3 family	EIL	TF	EIL
	Cluster-27241.76659	21.85	21.03	21.42	27.6	28.85	26.77	54.8	62.73	62.97	1255	719	737	1453	1130	1332	2215	3199	3736	0.296756	1.65402e-07	1.01195e-06	false	0.963996	0.00517147	0.03199	false	-1.12362	9.19395e-24	4.75052e-22	down	1.42487	5.7404e-42	6.46151e-40	up	NA	NA	NA	NA	NA	NA	NA	NA	NA	NA	NA
	Cluster-27241.76660	19.23	19.85	20.09	29.63	25.44	24.69	60.25	57.17	60.07	696.91	427.88	433.67	981.95	627.61	775.61	1528.45	1837.14	2252.18	0.36298	1.00289e-05	4.76844e-05	false	1.04675	0.00336404	0.0229541	up	-1.15752	7.22106e-31	5.5318e-29	down	1.52204	1.03674e-60	1.98386e-58	up	NA	NA	NA	NA	NA	NA	NA	NA	NA	NA	NA
	Cluster-27241.64046	0.9	1.08	0.93	1.03	0.43	0.74	0.26	0.29	0.44	122.07	87.19	76.37	128.45	39.93	87.19	24.78	35.63	62.02	-0.466676	0.119498	0.211449	false	-0.940177	0.0402968	0.136661	false	1.12336	0.0146253	0.0513338	false	-1.58828	1.28947e-06	1.09961e-05	down	4815	K14514 ethylene-insensitive protein 3 | (RefSeq) ETHYLENE INSENSITIVE 3-like 1 protein (A)	PREDICTED: BTB/POZ domain-containing protein At3g22104 isoform X1 [Elaeis guineensis]	EIN3_ARATH RecName: Full=Protein ETHYLENE INSENSITIVE 3;	A0A0C9RQ59_9SPER SubName: Full=TSA: Wollemia nobilis Ref_Wollemi_Transcript_3637_3249 transcribed RNA sequence {ECO:0000313|EMBL:JAG89162.1}; SubName: Full=TSA: Wollemia nobilis Ref_Wollemi_Transcript_3638_3304 transcribed RNA sequence {ECO:0000313|EMBL:JAG89161.1};	--	GO:0005634,nucleus; GO:0003700,DNA-binding transcription factor activity; GO:0044212,transcription regulatory region DNA binding; GO:0000976,transcription regulatory region sequence-specific DNA binding; GO:0071281,cellular response to iron ion; GO:0042742,defense response to bacterium; GO:0009873,ethylene-activated signaling pathway; GO:0006355,regulation of transcription, DNA-templated; GO:0009…	Ethylene insensitive 3	EIL	TF	EIL
mitogen-activated protein kinase 6	Cluster-27241.83141	2.64	3.55	3.01	4.89	4.4	3.48	8.67	10.33	10.41	199.74	160.03	137.03	340.02	227.62	228.07	463.2	694.97	814.07	0.406048	0.0179839	0.0432947	false	1.12385	0.00507688	0.031526	up	-1.21295	6.99691e-11	1.09682e-09	down	1.61845	5.46867e-17	1.63936e-15	up	NA	NA	NA	NA	NA	NA	NA	NA	NA	NA	NA
	Cluster-27241.83142	9.24	8.51	8.43	15.21	13.56	13.35	26.19	25.25	24.99	813.26	445.97	445.97	1228.98	815.38	1017.93	1627.8	1975.03	2270.93	0.60953	6.80335e-18	1.16479e-16	false	1.10566	7.77944e-05	0.00109101	up	-0.864741	2.57003e-22	1.18852e-20	false	1.47911	1.12574e-56	1.99871e-54	up	NA	NA	NA	NA	NA	NA	NA	NA	NA	NA	NA
mitogen-activated protein kinase kinase 4/5	Cluster-27241.52195	10.68	11.44	13.34	5.01	4.95	6.76	3.43	5.39	5.23	264	168	195	113	83	145	59	118	134	-1.14341	1.50362e-09	1.21097e-08	down	-1.26933	2.22676e-08	8.04024e-07	down	0.243905	0.449715	0.659709	false	-1.38813	2.32638e-07	2.23701e-06	down	1084	K13413 mitogen-activated protein kinase kinase 4/5 [EC:2.7.12.2] | (RefSeq) mitogen-activated protein kinase kinase 5-like (A)	unknown [Picea sitchensis]	LSH4_ARATH RecName: Full=Protein LIGHT-DEPENDENT SHORT HYPOCOTYLS 4; AltName: Full=Protein ORGAN BOUNDARY 4;	C0PTA9_PICSI SubName: Full=Uncharacterized protein {ECO:0000313|EMBL:ACN41049.1};	--	GO:0005634,nucleus; GO:0003677,DNA binding; GO:0009299,mRNA transcription; GO:0007275,multicellular organism development; GO:0090698,post-embryonic plant morphogenesis; GO:0006355,regulation of transcription, DNA-templated; GO:0009416,response to light stimulus; GO:0003674,molecular_function; GO:0003676,nucleic acid binding; GO:0005488,binding; GO:0097159,organic cyclic compound binding; GO:19013…	Protein of unknown function (DUF640)	--	--	--
serine/threonine-protein kinase CTR1	Cluster-27241.57498	0	0	0	3.52	3.27	2.96	7.53	1.21	0.97	0	0	0	462.76	319.78	366.39	762.3	154.16	142.46	10.7351	1.3104e-19	2.5198e-18	up	10.7251	2.03193e-15	2.60213e-13	up	0.00852738	0.990705	0.996525	false	10.7424	6.80829e-13	1.33926e-11	up	5046	K14510 serine/threonine-protein kinase CTR1 [EC:2.7.11.1] | (RefSeq) serine/threonine-protein kinase CTR1-like (A)	PREDICTED: uncharacterized protein LOC107412947 [Ziziphus jujuba]	SIS8_ARATH RecName: Full=Probable serine/threonine-protein kinase SIS8 {ECO:0000305}; EC=2.7.11.1 {ECO:0000305}; AltName: Full=MAPKK kinase SIS8 {ECO:0000305}; AltName: Full=Protein SUGAR INSENSITIVE 8 {ECO:0000303|PubMed:24320620};	A0A1D1Y7Z3_9ARAE SubName: Full=Putative serine/threonine-protein kinase DDB_G0272254 {ECO:0000313|EMBL:JAT50741.1}; Flags: Fragment;	Tyrosine kinase specific for activated (GTP-bound) p21cdc42Hs	GO:0005634,nucleus; GO:0005524,ATP binding; GO:0004672,protein kinase activity; GO:0004674,protein serine/threonine kinase activity; GO:0004712,protein serine/threonine/tyrosine kinase activity; GO:0004871,NA; GO:0035556,intracellular signal transduction; GO:0006468,protein phosphorylation; GO:0009651,response to salt stress; GO:0010182,sugar mediated signaling pathway; GO:0000166,nucleotide bind…	Protein tyrosine kinase	--	--	--
DELLA protein	Cluster-27241.90572	1.94	2.09	2.04	3.71	3.63	3.2	5.97	3.97	4.83	196	126	124	345	251	280	427	357	504	0.728595	1.46507e-08	1.0288e-07	false	0.984687	1.07341e-05	0.000198534	false	-0.489023	0.0147499	0.0516879	false	1.21823	3.62489e-08	4.01852e-07	up	NA	NA	NA	NA	NA	NA	NA	NA	NA	NA	NA
	Cluster-27241.50574	14.05	15.19	13.93	13.01	12.63	12.43	6.53	7.21	8.62	650	418	385	551	398	498	212	296	412	-0.250053	0.00228405	0.00702445	false	-0.592764	0.0224581	0.0919155	false	0.758515	2.33206e-06	1.89049e-05	false	-1.00989	5.93722e-10	8.39498e-09	down	1805	K14494 DELLA protein | (RefSeq) DELLA protein GAI (A)	hypothetical protein PHYPA_009727 [Physcomitrella patens]	SCL3_ARATH RecName: Full=Scarecrow-like protein 3; Short=AtSCL3; AltName: Full=GRAS family protein 5; Short=AtGRAS-5;	A9SWX7_PHYPA SubName: Full=GRS3 GRAS-type protein {ECO:0000313|EMBL:EDQ64379.1};	--	GO:0005634,nucleus; GO:0003700,DNA-binding transcription factor activity; GO:0043565,sequence-specific DNA binding; GO:0000989,NA; GO:0006355,regulation of transcription, DNA-templated; GO:0009739,response to gibberellin; GO:0006351,transcription, DNA-templated; GO:0140110,transcription regulator activity; GO:0003674,molecular_function; GO:0003676,nucleic acid binding; GO:0003677,DNA binding; GO:…	GRAS domain family	GRAS	TF	GRAS
	Cluster-27241.76267	13.33	15.34	15.03	11.3	13.28	11.81	27.05	31.29	15.81	1401.66	960.35	950.62	1090.48	953.28	1074.5	2008.85	2922.9	1715.07	-0.33841	0.00019513	0.000749081	false	0.266426	0.468704	0.663862	false	-1.03649	0.0002711	0.00154185	down	0.700766	0.0132913	0.0443179	false	NA	NA	NA	NA	NA	NA	NA	NA	NA	NA	NA
F-box protein GID2	Cluster-27241.95240	2.6	2.48	3.43	6.59	7.03	7.51	8.23	16.86	13.15	99.58	56.35	78.13	230.76	183.1	249.18	220.65	572.36	520.6	1.25387	7.51288e-12	7.81072e-11	up	1.73914	3.40776e-06	7.3029e-05	up	-0.866065	0.00601032	0.0240106	false	2.1127	9.77079e-10	1.33497e-08	up	NA	NA	NA	NA	NA	NA	NA	NA	NA	NA	NA
	Cluster-27241.95242	0	1.08	0.37	1.15	1.58	2.6	3.99	4.9	5.03	0	22.34	7.62	36.4	37.23	78.05	96.77	150.52	180.43	1.80647	0.211111	0.33109	false	2.67193	0.00426289	0.0276255	up	-1.39068	0.000574844	0.00304616	down	3.20772	0.00269737	0.0114348	up	NA	NA	NA	NA	NA	NA	NA	NA	NA	NA	NA
	Cluster-27241.101909	2.73	1.57	4.94	1.32	1.73	1.62	0	1.3	0.78	80.21	27.39	86.17	35.58	34.62	41.27	0	33.99	23.64	-1.03801	0.0141136	0.0350585	down	-1.50786	0.0840335	0.22449	false	1.14121	0.312054	0.528448	false	-2.18482	0.0511146	0.131662	false	1241	K14495 F-box protein GID2 | (RefSeq) F-box protein GID2-like (A)	unknown [Picea sitchensis]	SNE_ARATH RecName: Full=F-box protein SNE; AltName: Full=Protein SNEEZY; AltName: Full=Sleepy protein 2;	D5A9M4_PICSI SubName: Full=Uncharacterized protein {ECO:0000313|EMBL:ADE76243.1};	--	GO:0005634,nucleus; GO:0019005,SCF ubiquitin ligase complex; GO:0009740,gibberellic acid mediated signaling pathway; GO:0043161,proteasome-mediated ubiquitin-dependent protein catabolic process; GO:0016567,protein ubiquitination; GO:0009937,regulation of gibberellic acid mediated signaling pathway; GO:0048831,regulation of shoot system development; GO:0001101,response to acid chemical; GO:0007165…	F-box-like	--	--	--
gibberellin receptor GID1	Cluster-27241.100482	10.74	11.85	14.91	23.02	32.52	38.09	6.79	19.39	10.76	407.67	267.53	337.45	799.81	840.73	1253.38	180.51	652.96	422.76	1.25412	5.97368e-06	2.94229e-05	up	0.726872	0.141857	0.317382	false	1.33304	0.00181131	0.0084721	up	-0.0804294	0.845372	0.914008	false	1528	K14493 gibberellin receptor GID1 [EC:3.-.-.-] | (RefSeq) GID1b-2; hypothetical protein (A)	unknown [Picea sitchensis]	CXE18_ARATH RecName: Full=Probable carboxylesterase 18; AltName: Full=AtCXE18; EC=3.1.1.1;	A9NNN3_PICSI SubName: Full=Uncharacterized protein {ECO:0000313|EMBL:ABK22244.1};	Arylacetamide deacetylase	GO:0052689,carboxylic ester hydrolase activity; GO:0009056,catabolic process; GO:0009860,pollen tube growth; GO:0003674,molecular_function; GO:0003824,catalytic activity; GO:0016787,hydrolase activity; GO:0016788,hydrolase activity, acting on ester bonds; GO:0008152,metabolic process; GO:0008150,biological_process; GO:0000003,reproduction; GO:0000902,cell morphogenesis; GO:0000904,cell morphogene…	alpha/beta hydrolase fold	--	--	--
	Cluster-27241.107078	0	0.13	0.13	1.87	1.48	1.25	0.15	0.17	0.29	0	2.32	2.28	49.71	29.27	31.51	3	4.38	8.77	4.47615	2.18698e-07	1.31755e-06	up	3.50405	0.00484288	0.0303736	up	2.89574	1.30314e-06	1.10044e-05	up	NA	NA	NA	NA	NA	NA	NA	NA	NA	NA	NA	NA	NA	NA	NA
	Cluster-27241.39718	3.78	10.19	9.01	32.41	67.73	74.39	4.5	17.47	8.28	99.65	159.69	140.82	780.42	1214.11	1702.47	82.71	408.41	226.29	2.86018	3.34642e-07	1.96881e-06	up	2.07984	0.0082428	0.0451206	up	2.52144	3.5471e-06	2.79384e-05	up	0.336107	0.574017	0.727372	false	1140	K14493 gibberellin receptor GID1 [EC:3.-.-.-] | (RefSeq) GID1b-2; hypothetical protein (A)	unknown [Picea sitchensis]	CXE15_ARATH RecName: Full=Probable carboxylesterase 15; AltName: Full=AtCXE15; EC=3.1.1.1;	A9P1U1_PICSI SubName: Full=Uncharacterized protein {ECO:0000313|EMBL:ABK26852.1};	Arylacetamide deacetylase	GO:0052689,carboxylic ester hydrolase activity; GO:0016787,hydrolase activity; GO:0009056,catabolic process; GO:0003674,molecular_function; GO:0003824,catalytic activity; GO:0016788,hydrolase activity, acting on ester bonds; GO:0008152,metabolic process; GO:0008150,biological_process	alpha/beta hydrolase fold	--	--	--
	Cluster-27241.39725	0.22	0.08	0.25	1.24	1.4	0.89	0.32	0.57	0.3	5.87	1.27	3.84	29.74	25.13	20.42	5.93	13.34	8.26	2.57331	0.000265661	0.00099515	up	1.99484	0.012908	0.0620422	false	1.56411	0.00741562	0.0287227	up	NA	NA	NA	NA	1140	K14493 gibberellin receptor GID1 [EC:3.-.-.-] | (RefSeq) GID1b-2; hypothetical protein (A)	unknown [Picea sitchensis]	CXE15_ARATH RecName: Full=Probable carboxylesterase 15; AltName: Full=AtCXE15; EC=3.1.1.1;	A9P1U1_PICSI SubName: Full=Uncharacterized protein {ECO:0000313|EMBL:ABK26852.1};	Arylacetamide deacetylase	GO:0052689,carboxylic ester hydrolase activity; GO:0016787,hydrolase activity; GO:0009056,catabolic process; GO:0003674,molecular_function; GO:0003824,catalytic activity; GO:0016788,hydrolase activity, acting on ester bonds; GO:0008152,metabolic process; GO:0008150,biological_process	alpha/beta hydrolase fold	--	--	--
	Cluster-27241.53845	0.36	0.1	0.37	2.86	3.14	2.5	0.69	2.12	1.17	13.92	2.35	8.47	101.29	82.66	83.9	18.66	72.78	46.89	3.28148	1.02468e-15	1.48432e-14	up	2.87444	5.00636e-06	0.000101973	up	1.06664	0.0263883	0.0835261	false	2.25402	0.00305054	0.0127068	up	1553	K14493 gibberellin receptor GID1 [EC:3.-.-.-] | (RefSeq) GID1b-2; hypothetical protein (A)	unknown [Picea sitchensis]	CXE15_ARATH RecName: Full=Probable carboxylesterase 15; AltName: Full=AtCXE15; EC=3.1.1.1;	A0A0C9S8B0_9SPER SubName: Full=TSA: Wollemia nobilis Ref_Wollemi_Transcript_11806_1374 transcribed RNA sequence {ECO:0000313|EMBL:JAG87653.1};	Arylacetamide deacetylase	GO:0052689,carboxylic ester hydrolase activity; GO:0016787,hydrolase activity; GO:0009056,catabolic process; GO:0003674,molecular_function; GO:0003824,catalytic activity; GO:0016788,hydrolase activity, acting on ester bonds; GO:0008152,metabolic process; GO:0008150,biological_process	alpha/beta hydrolase fold	--	--	--
	Cluster-27241.73690	0.87	1.17	1.43	2.26	2.34	3.56	2.47	6.66	4.33	20.91	16.67	20.23	49.31	38.02	73.97	41.11	141.18	107.54	1.18772	0.00237026	0.00726384	up	1.58389	0.000986353	0.008671	up	-0.732961	0.13955	0.306087	false	1.9074	0.000303202	0.00165912	up	NA	NA	NA	NA	NA	NA	NA	NA	NA	NA	NA
	Cluster-27241.82308	0.7	0.38	0.49	1.52	1.54	1.38	1.02	0.94	1.42	23.41	7.58	9.78	46.63	34.95	40.08	23.96	27.8	49.18	1.37593	0.000720289	0.00247865	up	1.1894	0.00105151	0.0091417	up	0.381732	0.295873	0.510592	false	1.00533	0.0479197	0.125203	false	NA	NA	NA	NA	NA	NA	NA	NA	NA	NA	NA
	Cluster-27241.97030	2.18	1.43	2.05	0.7	0.49	0.95	0.54	0.15	0.48	64.86	25.32	36.09	19.11	9.91	24.56	11.21	3.82	14.65	-1.44237	0.000416628	0.00150156	down	-1.83651	0.000316514	0.00351144	down	NA	NA	NA	NA	-2.34914	7.97429e-05	0.000492476	down	NA	NA	NA	NA	NA	NA	NA	NA	NA	NA	NA
	Cluster-27241.100483	7.34	11.97	7.41	0	0	0.83	4.22	8.89	8.66	259.11	251.27	155.76	0	0	25.45	104.2	278.25	316.45	-5.06513	0.0167468	0.0407391	down	-1.30574	0.389449	0.596476	false	-4.70098	0.0278	0.0871726	false	-0.357498	0.357212	0.53618	false	1439	K14493 gibberellin receptor GID1 [EC:3.-.-.-] | (RefSeq) GID1b-2; hypothetical protein (A)	unknown [Picea sitchensis]	CXE18_ARATH RecName: Full=Probable carboxylesterase 18; AltName: Full=AtCXE18; EC=3.1.1.1;	A9NNN3_PICSI SubName: Full=Uncharacterized protein {ECO:0000313|EMBL:ABK22244.1};	Arylacetamide deacetylase	GO:0052689,carboxylic ester hydrolase activity; GO:0009056,catabolic process; GO:0009860,pollen tube growth; GO:0003674,molecular_function; GO:0003824,catalytic activity; GO:0016787,hydrolase activity; GO:0016788,hydrolase activity, acting on ester bonds; GO:0008152,metabolic process; GO:0008150,biological_process; GO:0000003,reproduction; GO:0000902,cell morphogenesis; GO:0000904,cell morphogene…	alpha/beta hydrolase fold	--	--	--
	Cluster-27241.101137	2.08	3.68	3.3	0	0.14	0	0.28	0.22	0.54	22	23	20	0	1	0	2	2	6	-6.22164	3.18708e-06	1.62995e-05	down	-3.97015	1.80766e-05	0.000312332	down	NA	NA	NA	NA	-3.13266	4.81538e-05	0.000310659	down	610	K14493 gibberellin receptor GID1 [EC:3.-.-.-] | (RefSeq) gibberellin receptor GID1B-like (A)	unknown [Picea sitchensis]	CXE15_ARATH RecName: Full=Probable carboxylesterase 15; AltName: Full=AtCXE15; EC=3.1.1.1;	A9NZR6_PICSI SubName: Full=Uncharacterized protein {ECO:0000313|EMBL:ABK26127.1};	Arylacetamide deacetylase	GO:0052689,carboxylic ester hydrolase activity; GO:0016787,hydrolase activity; GO:0009056,catabolic process; GO:0003674,molecular_function; GO:0003824,catalytic activity; GO:0016788,hydrolase activity, acting on ester bonds; GO:0008152,metabolic process; GO:0008150,biological_process	alpha/beta hydrolase fold	--	--	--
	Cluster-27241.38246	5.96	6.75	5.85	1.89	2.34	1.83	2.63	5	5.05	226.78	152.75	132.61	65.8	60.65	60.49	70.03	168.89	198.72	-1.69459	2.51743e-19	4.74391e-18	down	-1.05349	0.0107882	0.0546559	false	-1.07993	0.00356092	0.0153134	down	-0.608364	0.0589899	0.14698	false	1531	K14493 gibberellin receptor GID1 [EC:3.-.-.-] | (RefSeq) GID1a-1; hypothetical protein (A)	unknown [Picea sitchensis]	CXE17_ARATH RecName: Full=Probable carboxylesterase 17; AltName: Full=AtCXE17; EC=3.1.1.1;	D5A871_PICSI SubName: Full=Uncharacterized protein {ECO:0000313|EMBL:ADE75740.1};	Arylacetamide deacetylase	GO:0052689,carboxylic ester hydrolase activity; GO:0016787,hydrolase activity; GO:0009056,catabolic process; GO:0003674,molecular_function; GO:0003824,catalytic activity; GO:0016788,hydrolase activity, acting on ester bonds; GO:0008152,metabolic process; GO:0008150,biological_process	alpha/beta hydrolase fold	--	--	--
	Cluster-27241.92080	4.83	4.01	5.26	2.3	2.13	1.91	3.4	3.59	3.71	187.3	92.47	121.62	81.81	56.24	64.17	92.58	123.46	149.05	-1.22632	1.07293e-09	8.80216e-09	down	-0.79669	0.00633321	0.0370502	false	-0.765485	0.00063826	0.00334847	false	-0.458142	0.0347304	0.0972168	false	NA	NA	NA	NA	NA	NA	NA	NA	NA	NA	NA
	Cluster-27241.94718	4.63	7.48	8.28	8.56	14.33	15.54	13.42	29.6	16.93	153.27	147.18	162.81	258.68	322.34	445.59	310.22	868.04	579.62	0.85441	0.00177453	0.00559923	false	1.20537	0.00210081	0.0159059	up	-0.646872	0.108269	0.253878	false	1.49741	0.000167342	0.000965158	up	NA	NA	NA	NA	NA	NA	NA	NA	NA	NA	NA
	Cluster-27241.95310	19.37	17.82	19.72	31.47	31.67	36.41	71.66	67.85	71.35	514	281	310	762	571	838	1324	1595	1962	0.738567	4.53701e-13	5.25369e-12	false	1.37703	5.88595e-05	0.000869616	up	-1.08319	2.00698e-18	6.82663e-17	down	1.82554	1.83404e-73	5.69114e-71	up	NA	NA	NA	NA	NA	NA	NA	NA	NA	NA	NA
	Cluster-27241.107759	2.11	3.19	4.08	4.47	0	4.9	13.54	34.6	29.23	79.79	71.83	92.06	154.52	0	160.57	358.71	1160.59	1143.51	-0.0750124	0.964441	0.979209	false	2.14132	0.0744425	0.207105	false	-3.05111	0.0729797	0.188309	false	2.98283	3.27067e-12	5.97006e-11	up	NA	NA	NA	NA	NA	NA	NA	NA	NA	NA	NA
	Cluster-27241.37036	0.25	0.07	0.58	0.56	0.74	0.68	0.6	1.84	1.89	6.56	1.04	9.18	13.58	13.51	15.85	11.23	43.59	52.41	NA	NA	NA	NA	1.78195	0.0197707	0.0840953	false	-1.11141	0.081247	0.204329	false	2.22851	0.0138185	0.0458054	up	1151	K14493 gibberellin receptor GID1 [EC:3.-.-.-] | (RefSeq) GID1a-1; hypothetical protein (A)	unknown [Picea sitchensis]	CXE15_ARATH RecName: Full=Probable carboxylesterase 15; AltName: Full=AtCXE15; EC=3.1.1.1;	A9NQD3_PICSI SubName: Full=Uncharacterized protein {ECO:0000313|EMBL:ABK22844.1};	Arylacetamide deacetylase	GO:0052689,carboxylic ester hydrolase activity; GO:0016787,hydrolase activity; GO:0009056,catabolic process; GO:0003674,molecular_function; GO:0003824,catalytic activity; GO:0016788,hydrolase activity, acting on ester bonds; GO:0008152,metabolic process; GO:0008150,biological_process	--	--	--	--
	Cluster-27241.38245	1.8	1.5	1.48	1.3	1.2	1.55	3.51	4.77	6.85	93.88	46.75	46.16	62.24	42.79	70.27	128.81	221.42	369.92	-0.316325	0.207671	0.327148	false	0.935314	0.123762	0.290449	false	-1.90551	3.47501e-08	3.70157e-07	down	1.59444	1.73834e-06	1.45117e-05	up	2006	K14493 gibberellin receptor GID1 [EC:3.-.-.-] | (RefSeq) GID1b-2; hypothetical protein (A)	unknown [Picea sitchensis]	CXE17_ARATH RecName: Full=Probable carboxylesterase 17; AltName: Full=AtCXE17; EC=3.1.1.1;	D5A871_PICSI SubName: Full=Uncharacterized protein {ECO:0000313|EMBL:ADE75740.1};	Arylacetamide deacetylase	GO:0052689,carboxylic ester hydrolase activity; GO:0016787,hydrolase activity; GO:0009056,catabolic process; GO:0003674,molecular_function; GO:0003824,catalytic activity; GO:0016788,hydrolase activity, acting on ester bonds; GO:0008152,metabolic process; GO:0008150,biological_process	alpha/beta hydrolase fold	--	--	--
	Cluster-27241.53411	12.6	15.62	17.16	28.37	30.89	32.55	77.44	139.67	124.95	517	381	420	1065	863	1157	2227	5082	5300	0.952373	2.04553e-14	2.65746e-13	false	2.18861	7.61347e-05	0.00107343	up	-1.90421	2.06253e-13	4.39429e-12	down	2.85036	7.35723e-26	4.11384e-24	up	1630	K14493 gibberellin receptor GID1 [EC:3.-.-.-] | (RefSeq) GID1a-1; hypothetical protein (A)	unknown [Picea sitchensis]	CXE17_ARATH RecName: Full=Probable carboxylesterase 17; AltName: Full=AtCXE17; EC=3.1.1.1;	B8LKU1_PICSI SubName: Full=Uncharacterized protein {ECO:0000313|EMBL:ABR16271.1};	Arylacetamide deacetylase	GO:0052689,carboxylic ester hydrolase activity; GO:0016787,hydrolase activity; GO:0009056,catabolic process; GO:0003674,molecular_function; GO:0003824,catalytic activity; GO:0016788,hydrolase activity, acting on ester bonds; GO:0008152,metabolic process; GO:0008150,biological_process	alpha/beta hydrolase fold	--	--	--
	Cluster-27241.53844	0.83	0.8	1.1	0.19	0.64	0.29	3.24	8.51	8.11	21.37	12.3	16.86	4.41	11.17	6.5	58.32	194.85	217.15	NA	NA	NA	NA	1.89258	0.0928349	0.239727	false	-4.27009	8.97368e-11	1.38955e-09	down	2.82455	4.85588e-08	5.25402e-07	up	1122	K14493 gibberellin receptor GID1 [EC:3.-.-.-] | (RefSeq) GID1b-2; hypothetical protein (A)	unknown [Picea sitchensis]	CXE15_ARATH RecName: Full=Probable carboxylesterase 15; AltName: Full=AtCXE15; EC=3.1.1.1;	A0A0C9S8B0_9SPER SubName: Full=TSA: Wollemia nobilis Ref_Wollemi_Transcript_11806_1374 transcribed RNA sequence {ECO:0000313|EMBL:JAG87653.1};	Arylacetamide deacetylase	GO:0052689,carboxylic ester hydrolase activity; GO:0016787,hydrolase activity; GO:0009056,catabolic process; GO:0003674,molecular_function; GO:0003824,catalytic activity; GO:0016788,hydrolase activity, acting on ester bonds; GO:0008152,metabolic process; GO:0008150,biological_process	alpha/beta hydrolase fold	--	--	--
	Cluster-27241.55268	0	1.11	0	0.07	0.53	0.48	1.45	9.44	7.24	0	16.98	0	1.72	9.28	10.66	26.08	216.11	193.86	NA	NA	NA	NA	3.0684	0.0628485	0.184766	false	-4.07687	4.09142e-06	3.18906e-05	down	3.98401	0.0106334	0.036795	up	1122	K14493 gibberellin receptor GID1 [EC:3.-.-.-] | (RefSeq) GID1b-2; hypothetical protein (A)	unknown [Picea sitchensis]	CXE15_ARATH RecName: Full=Probable carboxylesterase 15; AltName: Full=AtCXE15; EC=3.1.1.1;	A0A0C9S8B0_9SPER SubName: Full=TSA: Wollemia nobilis Ref_Wollemi_Transcript_11806_1374 transcribed RNA sequence {ECO:0000313|EMBL:JAG87653.1};	Arylacetamide deacetylase	GO:0052689,carboxylic ester hydrolase activity; GO:0016787,hydrolase activity; GO:0009056,catabolic process; GO:0003674,molecular_function; GO:0003824,catalytic activity; GO:0016788,hydrolase activity, acting on ester bonds; GO:0008152,metabolic process; GO:0008150,biological_process	alpha/beta hydrolase fold	--	--	--
	Cluster-27241.84158	7.68	7.63	8.5	6.37	5.95	6.45	14.65	27.31	27.81	306.75	181.32	202.43	232.78	161.76	223.09	410.07	967.59	1148.81	-0.406691	0.00115495	0.00381701	false	0.829379	0.146167	0.323892	false	-1.90249	2.05207e-10	3.02312e-09	down	1.49025	3.58231e-07	3.33575e-06	up	NA	NA	NA	NA	NA	NA	NA	NA	NA	NA	NA
	Cluster-27241.84159	3.46	3.32	3	4.92	4.69	4.95	9.58	12.69	14.24	106.09	60.57	54.71	138	97.89	131.67	205.26	345.21	452.35	0.496703	0.00804697	0.0215225	false	1.31069	0.00333604	0.0227967	up	-1.33086	1.05661e-08	1.22723e-07	down	1.83114	1.25738e-13	2.67011e-12	up	NA	NA	NA	NA	NA	NA	NA	NA	NA	NA	NA
	Cluster-27241.107760	7.54	6.94	6.98	3.23	9.47	5.18	0.63	1.53	1.69	282.77	154.69	156.05	110.89	241.63	168.31	16.48	50.96	65.39	-0.337661	0.292553	0.424936	false	-1.06158	0.137297	0.310921	false	2.21325	0.000101074	0.000625638	up	-2.53899	7.60218e-11	1.20453e-09	down	NA	NA	NA	NA	NA	NA	NA	NA	NA	NA	NA
	Cluster-27241.54139	11.15	16.05	16.3	6.34	8.45	9.74	1.23	4.16	2.74	319.6	273.28	277.13	166	164.68	241.93	24.49	105.68	81.47	-0.888308	3.00074e-05	0.000132315	false	-1.48673	0.00931064	0.0491986	down	1.58575	0.00140666	0.00676252	up	-2.47795	9.53379e-08	9.84308e-07	down	1216	K14493 gibberellin receptor GID1 [EC:3.-.-.-] | (RefSeq) GID1b-2; hypothetical protein (A)	PrMC3 [Pinus radiata]	CXE17_ARATH RecName: Full=Probable carboxylesterase 17; AltName: Full=AtCXE17; EC=3.1.1.1;	Q9ZSE0_PINRA SubName: Full=prMC3 {ECO:0000313|EMBL:AAD04946.2};	Arylacetamide deacetylase	GO:0052689,carboxylic ester hydrolase activity; GO:0016787,hydrolase activity; GO:0009056,catabolic process; GO:0003674,molecular_function; GO:0003824,catalytic activity; GO:0016788,hydrolase activity, acting on ester bonds; GO:0008152,metabolic process; GO:0008150,biological_process	alpha/beta hydrolase fold	--	--	--
	Cluster-27241.71735	11.53	12.79	10.04	7.26	6.89	7.17	3.65	5.98	7.55	289.01	190.56	148.95	165.96	117.24	155.93	63.62	132.86	196.28	-0.759053	2.55995e-07	1.53001e-06	false	-0.906158	0.000213035	0.00253356	false	0.295652	0.370378	0.588825	false	-1.05549	0.00109641	0.00522045	down	NA	NA	NA	NA	NA	NA	NA	NA	NA	NA	NA
phytochrome-interacting factor 4	Cluster-27241.9942	0.24	0.21	0.15	0.59	0.48	0.61	0.86	0.84	0.92	19	10	7	43	26	42	48	59	75	1.40176	0.00126411	0.00412918	up	1.75182	7.75294e-06	0.00014968	up	-0.63348	0.038743	0.114555	false	2.03984	1.22897e-06	1.0518e-05	up	NA	NA	NA	NA	NA	NA	NA	NA	NA	NA	NA
	Cluster-27241.38118	1.22	1.59	1.23	3.18	3.27	3.08	3.14	2.94	3.45	18.6	14.4	11	44.12	33.83	41	33	39.74	55	1.19037	0.00196097	0.00611969	up	1.1935	7.29082e-05	0.00103583	up	-0.00933754	0.976579	0.990222	false	1.19959	0.00448205	0.0177632	up	769	K12126 phytochrome-interacting factor 3 | (RefSeq) transcription factor PIF3-like (A)	unknown [Picea sitchensis]	SPT_ARATH RecName: Full=Transcription factor SPATULA; AltName: Full=Basic helix-loop-helix protein 24; Short=AtbHLH24; Short=bHLH 24; AltName: Full=Transcription factor EN 99; AltName: Full=bHLH transcription factor bHLH024;	A9NSU4_PICSI SubName: Full=Uncharacterized protein {ECO:0000313|EMBL:ABK23705.1};	--	GO:0005634,nucleus; GO:0003677,DNA binding; GO:0003700,DNA-binding transcription factor activity; GO:0046983,protein dimerization activity; GO:0048440,carpel development; GO:0007623,circadian rhythm; GO:0010154,fruit development; GO:0010187,negative regulation of seed germination; GO:0009409,response to cold; GO:0010114,response to red light; GO:0006351,transcription, DNA-templated; GO:0003674,mo…	Helix-loop-helix DNA-binding domain	bHLH	TF	bHLH
	Cluster-27241.52578	2.85	2.43	0	0.89	0.31	0	0	0.08	0	43.74	22.12	0	12.4	3.2	0	0	1.06	0	-2.29373	0.1182	0.209667	false	-3.21195	0.106353	0.262435	false	NA	NA	NA	NA	-6.07966	0.00432487	0.0172095	down	771	K12126 phytochrome-interacting factor 3 | (RefSeq) transcription factor PIF3-like (A)	unknown [Picea sitchensis]	SPT_ARATH RecName: Full=Transcription factor SPATULA; AltName: Full=Basic helix-loop-helix protein 24; Short=AtbHLH24; Short=bHLH 24; AltName: Full=Transcription factor EN 99; AltName: Full=bHLH transcription factor bHLH024;	A9NSU4_PICSI SubName: Full=Uncharacterized protein {ECO:0000313|EMBL:ABK23705.1};	--	GO:0005634,nucleus; GO:0003677,DNA binding; GO:0003700,DNA-binding transcription factor activity; GO:0046983,protein dimerization activity; GO:0048440,carpel development; GO:0007623,circadian rhythm; GO:0010154,fruit development; GO:0010187,negative regulation of seed germination; GO:0009409,response to cold; GO:0010114,response to red light; GO:0006351,transcription, DNA-templated; GO:0003674,mo…	Helix-loop-helix DNA-binding domain	bHLH	TF	bHLH
coronatine-insensitive protein 1	Cluster-27241.88093	7.04	8.56	7.56	4.16	4.58	4.56	4.2	3.48	2.9	53	38	32	28	23	30	21	23	23	-0.851362	0.00839835	0.0223407	false	-1.02298	0.00027592	0.0031421	down	0.346503	0.404313	0.620401	false	-1.19609	0.00202394	0.00893063	down	NA	NA	NA	NA	NA	NA	NA	NA	NA	NA	NA
jasmonate ZIM domain-containing protein	Cluster-27241.58754	1.6	1.04	0.98	2.98	3.41	3.07	2.69	2.62	1.69	121.57	46.98	44.42	207.49	176.3	201.43	143.63	176.29	132.18	1.28252	3.44597e-09	2.65054e-08	up	1.09459	9.8536e-05	0.00132515	up	0.429878	0.106596	0.25089	false	0.87915	0.013191	0.0440333	false	2795	K13464 jasmonate ZIM domain-containing protein | (RefSeq) protein TIFY 6B isoform X1 (A)	unknown [Picea sitchensis]	TIF6B_ARATH RecName: Full=Protein TIFY 6B; AltName: Full=Jasmonate ZIM domain-containing protein 3; AltName: Full=Protein JASMONATE INSENSITIVE 3;	B8LPL1_PICSI SubName: Full=Uncharacterized protein {ECO:0000313|EMBL:ABR17591.1};	--	GO:0005634,nucleus; GO:0042802,identical protein binding; GO:0003714,transcription corepressor activity; GO:0006952,defense response; GO:0009867,jasmonic acid mediated signaling pathway; GO:1903507,negative regulation of nucleic acid-templated transcription; GO:0031347,regulation of defense response; GO:2000022,regulation of jasmonic acid mediated signaling pathway; GO:0006355,regulation of trans…	tify domain	Others	TR	Others
	Cluster-27241.124188	4.43	4.4	4.31	2.08	1.83	1.89	21.45	29.64	31.75	109.56	64.71	63.09	46.91	30.73	40.67	369.06	649.51	814.51	-1.24062	2.34837e-07	1.40753e-06	down	1.6882	0.0724501	0.203289	false	-3.83313	4.73621e-47	7.13245e-45	down	2.59344	3.14718e-28	2.00743e-26	up	NA	NA	NA	NA	NA	NA	NA	NA	NA	NA	NA
	Cluster-27241.32747	3.91	4.49	4.34	1.12	0.85	0.75	1.4	2.18	2.13	133.77	91.26	88.22	34.96	19.8	22.11	33.41	66.21	75.36	-2.28628	4.67968e-18	8.13947e-17	down	-1.66324	4.0973e-05	0.000636613	down	-1.0748	0.00811469	0.0310752	down	-1.21412	4.33297e-05	0.000282447	down	1401	K13464 jasmonate ZIM domain-containing protein | (RefSeq) protein TIFY 10b-like (A)	unknown [Picea sitchensis]	TI10B_ORYSJ RecName: Full=Protein TIFY 10b {ECO:0000305}; Short=OsTIFY10b {ECO:0000303|PubMed:19618278}; AltName: Full=Jasmonate ZIM domain-containing protein 7 {ECO:0000305}; Short=OsJAZ7 {ECO:0000303|PubMed:19618278}; AltName: Full=OsJAZ6 {ECO:0000303|PubMed:21332845};	D5ADR6_PICSI SubName: Full=Uncharacterized protein {ECO:0000313|EMBL:ADE77685.1};	--	GO:0005634,nucleus; GO:0003714,transcription corepressor activity; GO:1903507,negative regulation of nucleic acid-templated transcription; GO:0031347,regulation of defense response; GO:2000022,regulation of jasmonic acid mediated signaling pathway; GO:0006355,regulation of transcription, DNA-templated; GO:0009611,response to wounding; GO:0006351,transcription, DNA-templated; GO:0140110,transcript…	tify domain	Tify	TF	Tify
	Cluster-27241.51133	6.69	6.11	8.6	2.68	2.67	2.2	1.13	1.3	1.84	221	120	169	81	60	63	26	38	63	-1.57468	1.89087e-14	2.47074e-13	down	-1.93407	2.23629e-09	1.01428e-07	down	0.804011	0.0177773	0.0603462	false	-2.37793	5.78293e-14	1.2679e-12	down	1363	K13464 jasmonate ZIM domain-containing protein | (RefSeq) protein TIFY 10A-like (A)	unknown [Picea sitchensis]	TI10B_ORYSJ RecName: Full=Protein TIFY 10b {ECO:0000305}; Short=OsTIFY10b {ECO:0000303|PubMed:19618278}; AltName: Full=Jasmonate ZIM domain-containing protein 7 {ECO:0000305}; Short=OsJAZ7 {ECO:0000303|PubMed:19618278}; AltName: Full=OsJAZ6 {ECO:0000303|PubMed:21332845};	D5ADR6_PICSI SubName: Full=Uncharacterized protein {ECO:0000313|EMBL:ADE77685.1};	--	GO:0005634,nucleus; GO:0003714,transcription corepressor activity; GO:1903507,negative regulation of nucleic acid-templated transcription; GO:0031347,regulation of defense response; GO:2000022,regulation of jasmonic acid mediated signaling pathway; GO:0006355,regulation of transcription, DNA-templated; GO:0009611,response to wounding; GO:0006351,transcription, DNA-templated; GO:0140110,transcript…	tify domain	Tify	TF	Tify
	Cluster-27241.67212	9.68	7.46	5.85	2.08	2.09	1.63	14.91	20.36	23.09	164	75	58	32	24	24	174	305	407	-2.07122	5.6836e-12	5.97863e-11	down	0.42052	0.631953	0.786409	false	-3.34534	3.68142e-26	2.20628e-24	down	1.27943	2.56847e-05	0.000175428	up	NA	NA	NA	NA	NA	NA	NA	NA	NA	NA	NA
	Cluster-27241.94479	0.36	1.28	0.39	0.25	0.11	0	11.5	22.44	19.5	4.71	10	3	3	1	0	103.49	261.12	268.05	NA	NA	NA	NA	3.65725	0.0226562	0.0924889	false	-7.19009	2.84457e-17	8.66377e-16	down	4.69924	1.7718e-15	4.55772e-14	up	NA	NA	NA	NA	NA	NA	NA	NA	NA	NA	NA
	Cluster-27241.10625	0.31	0	0.21	0.21	0.09	0.29	3.9	5.22	5.45	5	0	2	3	1	4	43	74	91	0.306115	0.0925369	0.172035	false	3.75651	0.00867214	0.0466777	up	-4.59955	3.78521e-12	6.94002e-11	down	4.60058	4.19333e-10	6.05597e-09	up	NA	NA	NA	NA	NA	NA	NA	NA	NA	NA	NA
	Cluster-27241.122096	0.15	0	0.33	0	0	0	9.06	12	15.26	2.29	0	3	0	0	0	97.06	165.42	247.78	NA	NA	NA	NA	5.26032	0.019628	0.0836712	false	-9.70921	6.22499e-15	1.54263e-13	down	6.2986	1.30612e-16	3.74899e-15	up	NA	NA	NA	NA	NA	NA	NA	NA	NA	NA	NA
	Cluster-27241.122559	0.27	0.21	0.19	0.32	0.11	0.44	3.05	4.2	4.79	7.65	3.46	3.25	8.3	2.09	10.9	60.32	105.49	140.68	NA	NA	NA	NA	3.26043	0.0040333	0.0264528	up	-3.77089	4.83292e-12	8.74267e-11	down	4.12254	5.86965e-14	1.28528e-12	up	NA	NA	NA	NA	NA	NA	NA	NA	NA	NA	NA
	Cluster-27241.128792	0.94	1.27	0.79	1.03	0.92	0.72	4.26	3.46	4.18	30	24	15	30	20	20	95	98	138	-0.232913	0.576039	0.699196	false	1.21302	0.0794512	0.21634	false	-2.15926	3.65609e-12	6.70676e-11	down	1.93286	7.21569e-09	8.79466e-08	up	NA	NA	NA	NA	NA	NA	NA	NA	NA	NA	NA
	Cluster-27241.14409	0	0.08	0.21	0.14	0	0.05	4.31	5.24	4.81	0	1	2.6	2.75	0	1	64.06	99.31	106.88	NA	NA	NA	NA	4.50446	0.0109608	0.0552444	false	-5.99901	2.09621e-13	4.45526e-12	down	5.69018	9.15308e-12	1.60279e-10	up	NA	NA	NA	NA	NA	NA	NA	NA	NA	NA	NA
	Cluster-27241.14413	0	0	0	0.37	0	0	11.8	11.18	10.74	0	0	0	1	0	0	23	30	36	NA	NA	NA	NA	5.97285	0.0152166	0.0696989	false	-6.26946	1.83857e-06	1.51271e-05	down	6.96003	2.53973e-07	2.42524e-06	up	NA	NA	NA	NA	NA	NA	NA	NA	NA	NA	NA
	Cluster-27241.25701	6.27	4.58	5.05	4.4	2.33	4.15	16.43	30.02	29.43	126.68	54.92	60	81	31.85	72.75	229.68	536.7	617.27	-0.610176	0.0361357	0.0785796	false	1.38716	0.0785525	0.214635	false	-2.80254	1.87208e-13	4.00549e-12	down	2.19097	1.73854e-11	2.95861e-10	up	933	K13464 jasmonate ZIM domain-containing protein | (RefSeq) protein TIFY 10a (A)	unknown [Picea sitchensis]	TI10A_ORYSJ RecName: Full=Protein TIFY 10a {ECO:0000305}; Short=OsTIFY10a {ECO:0000303|PubMed:19618278}; AltName: Full=Jasmonate ZIM domain-containing protein 6 {ECO:0000305}; Short=OsJAZ6 {ECO:0000303|PubMed:19618278}; AltName: Full=OsJAZ5 {ECO:0000303|PubMed:23320078};	A9P132_PICSI SubName: Full=Uncharacterized protein {ECO:0000313|EMBL:ABK26593.1};	--	GO:0005634,nucleus; GO:0003714,transcription corepressor activity; GO:1903507,negative regulation of nucleic acid-templated transcription; GO:0031347,regulation of defense response; GO:2000022,regulation of jasmonic acid mediated signaling pathway; GO:0006355,regulation of transcription, DNA-templated; GO:0009611,response to wounding; GO:0006351,transcription, DNA-templated; GO:0140110,transcript…	tify domain	Tify	TF	Tify
	Cluster-27241.2582	0.61	0.43	0.65	0.15	0.05	0.32	1.67	2.52	2.68	17.27	7.26	11	4	1	8	33.09	63.32	78.68	0.146604	0.340954	0.477857	false	1.08657	0.317998	0.527143	false	-3.65311	7.57107e-08	7.65778e-07	down	1.97785	3.49748e-05	0.000232428	up	1207	K13464 jasmonate ZIM domain-containing protein | (RefSeq) protein TIFY 10B (A)	unknown [Picea sitchensis]	TI10B_ORYSJ RecName: Full=Protein TIFY 10b {ECO:0000305}; Short=OsTIFY10b {ECO:0000303|PubMed:19618278}; AltName: Full=Jasmonate ZIM domain-containing protein 7 {ECO:0000305}; Short=OsJAZ7 {ECO:0000303|PubMed:19618278}; AltName: Full=OsJAZ6 {ECO:0000303|PubMed:21332845};	A9NQ92_PICSI SubName: Full=Uncharacterized protein {ECO:0000313|EMBL:ABK22803.1};	--	GO:0005634,nucleus; GO:0003714,transcription corepressor activity; GO:1903507,negative regulation of nucleic acid-templated transcription; GO:0031347,regulation of defense response; GO:2000022,regulation of jasmonic acid mediated signaling pathway; GO:0006355,regulation of transcription, DNA-templated; GO:0009611,response to wounding; GO:0006351,transcription, DNA-templated; GO:0140110,transcript…	tify domain	Tify	TF	Tify
	Cluster-27241.25835	1.08	0.88	0.44	1.49	1.2	1.26	6.45	7.45	7.69	37	18	9	47	28	37.66	155.12	227.29	273.68	0.630898	0.128961	0.224663	false	2.34455	0.00193803	0.0149649	up	-2.44655	2.71707e-23	1.35236e-21	down	3.07632	2.32115e-18	7.71716e-17	up	1408	K13464 jasmonate ZIM domain-containing protein | (RefSeq) protein TIFY 9-like (A)	unknown [Picea sitchensis]	--	A9NZP0_PICSI SubName: Full=Uncharacterized protein {ECO:0000313|EMBL:ABK26101.1};	--	--	tify domain	Tify	TF	Tify
	Cluster-27241.30927	0.23	0.06	0.14	0.05	0	0	3.56	3.57	4.41	6.86	1	2.4	1.25	0	0	73.74	94.09	135.65	NA	NA	NA	NA	3.75977	0.0360555	0.12699	false	-8.02768	7.12776e-11	1.11534e-09	down	4.63528	9.10328e-15	2.16692e-13	up	1251	K13464 jasmonate ZIM domain-containing protein | (RefSeq) protein TIFY 10b (A)	unknown [Picea sitchensis]	TI10A_ARATH RecName: Full=Protein TIFY 10A; AltName: Full=Jasmonate ZIM domain-containing protein 1;	A9P132_PICSI SubName: Full=Uncharacterized protein {ECO:0000313|EMBL:ABK26593.1};	--	GO:0005634,nucleus; GO:0003714,transcription corepressor activity; GO:0042742,defense response to bacterium; GO:0009908,flower development; GO:0009867,jasmonic acid mediated signaling pathway; GO:1903507,negative regulation of nucleic acid-templated transcription; GO:0009555,pollen development; GO:1900067,regulation of cellular response to alkaline pH; GO:0031347,regulation of defense response; G…	tify domain	Tify	TF	Tify
	Cluster-27241.30928	0.04	0.06	0	0	0	0	1.58	1.97	2.12	1.14	1	0	0	0	0	32.67	51.98	65.14	NA	NA	NA	NA	4.90624	0.0333619	0.120461	false	-7.96677	5.81167e-10	8.04389e-09	down	5.89093	2.11869e-07	2.04702e-06	up	1251	K13464 jasmonate ZIM domain-containing protein | (RefSeq) protein TIFY 10A-like (A)	unknown [Picea sitchensis]	TI10A_ARATH RecName: Full=Protein TIFY 10A; AltName: Full=Jasmonate ZIM domain-containing protein 1;	A9P132_PICSI SubName: Full=Uncharacterized protein {ECO:0000313|EMBL:ABK26593.1};	--	GO:0005634,nucleus; GO:0003714,transcription corepressor activity; GO:0042742,defense response to bacterium; GO:0009908,flower development; GO:0009867,jasmonic acid mediated signaling pathway; GO:1903507,negative regulation of nucleic acid-templated transcription; GO:0009555,pollen development; GO:1900067,regulation of cellular response to alkaline pH; GO:0031347,regulation of defense response; G…	tify domain	Tify	TF	Tify
	Cluster-27241.5315	0	0	0	0.03	0.05	0.11	11.37	12.72	13.59	0	0	0	1	1	3	250	355	443	NA	NA	NA	NA	9.51161	6.04427e-06	0.000119881	up	-7.61131	7.59631e-29	5.38604e-27	down	10.507	2.034e-18	6.78869e-17	up	1311	K13464 jasmonate ZIM domain-containing protein | (RefSeq) protein TIFY 9 (A)	unknown [Picea sitchensis]	TIF9_ARATH RecName: Full=Protein TIFY 9; AltName: Full=Jasmonate ZIM domain-containing protein 10; AltName: Full=Protein JASMONATE-ASSOCIATED 1; AltName: Full=Protein JAZ10;	C0PRV6_PICSI SubName: Full=Uncharacterized protein {ECO:0000313|EMBL:ACN40546.1};	--	GO:0005634,nucleus; GO:0042803,protein homodimerization activity; GO:0003714,transcription corepressor activity; GO:0006952,defense response; GO:1903507,negative regulation of nucleic acid-templated transcription; GO:2000022,regulation of jasmonic acid mediated signaling pathway; GO:0010112,regulation of systemic acquired resistance; GO:0006355,regulation of transcription, DNA-templated; GO:00097…	tify domain	Tify	TF	Tify
	Cluster-27241.65074	1.42	4.28	0	0	0	0	6.48	11.16	11.25	38.83	69.73	0	0	0	0	123.92	271.23	319.59	-7.92538	0.0426271	0.0904285	false	1.27539	0.65759	0.803696	false	-10.2	2.5521e-16	7.23201e-15	down	2.27543	0.0444725	0.118013	false	1175	K13464 jasmonate ZIM domain-containing protein | (RefSeq) protein TIFY 10A (A)	unknown [Picea sitchensis]	TI10B_ORYSJ RecName: Full=Protein TIFY 10b {ECO:0000305}; Short=OsTIFY10b {ECO:0000303|PubMed:19618278}; AltName: Full=Jasmonate ZIM domain-containing protein 7 {ECO:0000305}; Short=OsJAZ7 {ECO:0000303|PubMed:19618278}; AltName: Full=OsJAZ6 {ECO:0000303|PubMed:21332845};	D5ADR6_PICSI SubName: Full=Uncharacterized protein {ECO:0000313|EMBL:ADE77685.1};	--	GO:0005634,nucleus; GO:0003714,transcription corepressor activity; GO:1903507,negative regulation of nucleic acid-templated transcription; GO:0031347,regulation of defense response; GO:2000022,regulation of jasmonic acid mediated signaling pathway; GO:0006355,regulation of transcription, DNA-templated; GO:0009611,response to wounding; GO:0006351,transcription, DNA-templated; GO:0140110,transcript…	tify domain	Tify	TF	Tify
transcription factor MYC2	Cluster-29124.0	0.44	0.25	0.25	1.32	1.09	0.97	1.93	2.42	2.19	18	6	6	49	30	34	55	87	92	1.72015	0.000261372	0.000980927	up	2.29257	3.23729e-06	6.96582e-05	up	-0.965195	0.00168398	0.00794613	false	2.68743	3.20753e-09	4.1332e-08	up	NA	NA	NA	NA	NA	NA	NA	NA	NA	NA	NA
	Cluster-27241.104920	0.45	0.47	0.34	0.92	0.85	1.25	0.44	0.32	0.38	42	26	19	78	54	100	29	26	36	1.18102	0.000127536	0.000506585	up	0.63491	0.220863	0.421891	false	1.41841	7.00251e-05	0.000448168	up	-0.230419	0.5701	0.724863	false	NA	NA	NA	NA	NA	NA	NA	NA	NA	NA	NA
	Cluster-27241.129837	0.62	0.59	0.79	1.64	1.41	1.24	1.37	0.85	1.09	60	34	46	146	93	104	94	73	109	1.03522	1.1028e-05	5.21202e-05	up	0.84937	0.00123027	0.0104002	false	0.37327	0.181286	0.369878	false	0.661934	0.0507488	0.130955	false	NA	NA	NA	NA	NA	NA	NA	NA	NA	NA	NA
	Cluster-27241.25427	0.06	0.27	0.16	1.35	1.07	1.06	0.91	0.21	0.4	2	5	3	39	23	29	20	6	13	2.86007	2.46826e-05	0.000110403	up	2.32676	0.00355435	0.0239874	up	1.22598	0.0583172	0.158238	false	NA	NA	NA	NA	1315	K13422 transcription factor MYC2 | (RefSeq) transcription factor MYC2-like (A)	Myc-type [Macleaya cordata]	BH018_ARATH RecName: Full=Transcription factor bHLH18; AltName: Full=Basic helix-loop-helix protein 18; Short=AtbHLH18; Short=bHLH 18; AltName: Full=Transcription factor EN 28; AltName: Full=bHLH transcription factor bHLH018;	A0A176VHM2_MARPO SubName: Full=Uncharacterized protein {ECO:0000313|EMBL:OAE20370.1};	--	GO:0005634,nucleus; GO:0003677,DNA binding; GO:0003700,DNA-binding transcription factor activity; GO:0046983,protein dimerization activity; GO:0006355,regulation of transcription, DNA-templated; GO:0006351,transcription, DNA-templated; GO:0003674,molecular_function; GO:0003676,nucleic acid binding; GO:0005488,binding; GO:0097159,organic cyclic compound binding; GO:1901363,heterocyclic compound bi…	Helix-loop-helix DNA-binding domain	bHLH	TF	bHLH
	Cluster-27241.31554	0.69	0.89	0.62	1.87	2.27	1.73	0.95	0.69	1.09	30	23	15.91	73.86	66.79	64.72	28.95	26.48	48.54	1.34449	1.53586e-05	7.10128e-05	up	0.884781	0.0522035	0.162795	false	1.09753	0.00145617	0.00697391	up	0.246366	0.576924	0.729717	false	1704	K13422 transcription factor MYC2 | (RefSeq) transcription factor MYC2 (A)	Myc-type [Macleaya cordata]	BH025_ARATH RecName: Full=Transcription factor bHLH25; AltName: Full=Basic helix-loop-helix protein 25; Short=AtbHLH25; Short=bHLH 25; AltName: Full=Transcription factor EN 29; AltName: Full=bHLH transcription factor bHLH025;	A0A200QA70_9MAGN SubName: Full=Myc-type {ECO:0000313|EMBL:OVA07341.1};	--	GO:0005634,nucleus; GO:0003677,DNA binding; GO:0003700,DNA-binding transcription factor activity; GO:0046983,protein dimerization activity; GO:0006355,regulation of transcription, DNA-templated; GO:0006351,transcription, DNA-templated; GO:0003674,molecular_function; GO:0003676,nucleic acid binding; GO:0005488,binding; GO:0097159,organic cyclic compound binding; GO:1901363,heterocyclic compound bi…	Helix-loop-helix DNA-binding domain	bHLH	TF	bHLH
	Cluster-27241.53154	1.82	1.3	1.85	3.79	3.88	3.61	2.03	2.67	2.32	40	17	24	76	58	69	31	52	53	1.10305	0.00014009	0.000552113	up	0.801443	0.0165051	0.0738822	false	0.672574	0.0209428	0.0691855	false	0.435993	0.258629	0.432018	false	994	K13422 transcription factor MYC2 | (RefSeq) transcription factor MYC3-like isoform X1 (A)	hypothetical protein AXG93_3884s1350 [Marchantia polymorpha subsp. ruderalis]	BH035_ARATH RecName: Full=Transcription factor bHLH35; AltName: Full=Basic helix-loop-helix protein 35; Short=AtbHLH35; Short=bHLH 35; AltName: Full=Transcription factor EN 41; AltName: Full=bHLH transcription factor bHLH035;	A0A176W9M5_MARPO SubName: Full=Uncharacterized protein {ECO:0000313|EMBL:OAE29739.1};	--	GO:0005634,nucleus; GO:0003677,DNA binding; GO:0046983,protein dimerization activity; GO:0006355,regulation of transcription, DNA-templated; GO:0006351,transcription, DNA-templated; GO:0003674,molecular_function; GO:0003676,nucleic acid binding; GO:0005488,binding; GO:0097159,organic cyclic compound binding; GO:1901363,heterocyclic compound binding; GO:0005515,protein binding; GO:0008152,metaboli…	Helix-loop-helix DNA-binding domain	bHLH	TF	bHLH
	Cluster-27241.81247	3.13	2.75	2.86	6.99	7.05	6.04	4.16	3.55	3.15	170	89	93	348	261	284	159	171	177	1.11632	4.40756e-16	6.57004e-15	up	0.74217	0.0175825	0.0772562	false	0.885317	1.59402e-06	1.32574e-05	false	0.241792	0.268345	0.442515	false	NA	NA	NA	NA	NA	NA	NA	NA	NA	NA	NA
	Cluster-27241.38553	3.07	3.36	3.11	5.2	4.59	4.92	12.46	6.64	7.02	304	198	185	472	310	421	871	584	717	0.557971	1.68488e-07	1.02934e-06	false	1.0204	0.00204332	0.0155764	up	-0.830746	0.00362958	0.0155656	false	1.38777	3.23444e-06	2.59086e-05	up	3570	K13422 transcription factor MYC2 | (RefSeq) transcription factor MYC2-like (A)	transcription factor LHW isoform X1 [Amborella trichopoda]	LHWL3_ARATH RecName: Full=Transcription factor bHLH155; AltName: Full=BHLH transcription factor gamma; Short=bHLH gamma; AltName: Full=Basic helix-loop-helix protein 155; Short=AtbHLH155; Short=bHLH 155; AltName: Full=LONESOME HIGHWAY-like protein 3; AltName: Full=bHLH transcription factor bHLH155;	U5D1K3_AMBTC SubName: Full=Uncharacterized protein {ECO:0000313|EMBL:ERN16095.1};	--	GO:0005634,nucleus; GO:0003677,DNA binding; GO:0003700,DNA-binding transcription factor activity; GO:0046983,protein dimerization activity; GO:0006355,regulation of transcription, DNA-templated; GO:0048364,root development; GO:0006351,transcription, DNA-templated; GO:0003674,molecular_function; GO:0003676,nucleic acid binding; GO:0005488,binding; GO:0097159,organic cyclic compound binding; GO:190…	bHLH-MYC and R2R3-MYB transcription factors N-terminal	--	--	--
	Cluster-27241.66433	2.66	2.87	2.65	2.88	2.51	2.43	9.89	7.68	7.54	362.34	232.87	217.18	360.39	233.17	286.41	951.09	928.07	1057.48	-0.135343	0.227529	0.35075	false	0.933876	0.0610736	0.181029	false	-1.68644	7.26921e-23	3.48517e-21	down	1.55144	1.71234e-18	5.74292e-17	up	4811	K13422 transcription factor MYC2 | (RefSeq) transcription factor MYC4-like (A)	unknown [Picea sitchensis]	MYC2_ARATH RecName: Full=Transcription factor MYC2; Short=AtMYC2; AltName: Full=Basic helix-loop-helix protein 6; Short=AtbHLH6; Short=bHLH 6; AltName: Full=Protein JASMONATE INSENSITIVE 1; AltName: Full=R-homologous Arabidopsis protein 1; Short=RAP-1; AltName: Full=Transcription factor EN 38; AltName: Full=Z-box binding factor 1 protein; AltName: Full=bHLH transcription factor bHLH006; AltName: …	B8LLU3_PICSI SubName: Full=Uncharacterized protein {ECO:0000313|EMBL:ABR16623.1};	--	GO:0005634,nucleus; GO:0003677,DNA binding; GO:0003700,DNA-binding transcription factor activity; GO:0046983,protein dimerization activity; GO:0043565,sequence-specific DNA binding; GO:0009738,abscisic acid-activated signaling pathway; GO:0009963,positive regulation of flavonoid biosynthetic process; GO:0045893,positive regulation of transcription, DNA-templated; GO:2000068,regulation of defense …	bHLH-MYC and R2R3-MYB transcription factors N-terminal	bHLH	TF	bHLH
pathogenesis-related protein 1	Cluster-27241.33366	0.95	1.24	0.51	2.75	1.91	3.24	0.44	1.08	0.58	22	17	7	58	30	65	7	22	14	1.4825	0.000603048	0.0021108	up	0.813978	0.264562	0.471031	false	1.90222	0.000442257	0.00240468	up	NA	NA	NA	NA	1030	K13449 pathogenesis-related protein 1 | (RefSeq) pathogenesis-related protein 1-like (A)	unknown [Picea sitchensis]	PR1_MEDTR RecName: Full=Pathogenesis-related protein PR-1; Flags: Precursor;	A9NXZ7_PICSI SubName: Full=Uncharacterized protein {ECO:0000313|EMBL:ABK25508.1};	Defense-related protein containing SCP domain	GO:0005576,extracellular region; GO:0006952,defense response; GO:0009607,response to biotic stimulus; GO:0006950,response to stress; GO:0008150,biological_process; GO:0050896,response to stimulus; GO:0005575,cellular_component	Cysteine-rich secretory protein family	--	--	--
	Cluster-27241.78060	69.09	63.09	70.02	26.11	23.59	26.14	11.31	37.04	38.13	807.86	436.61	472.37	275.83	185.73	266.05	89.84	381.75	465.54	-1.47372	1.23625e-53	8.1333e-52	down	-1.37249	9.82629e-05	0.00132292	down	-0.207013	0.665985	0.820943	false	-1.27038	0.00491847	0.0192317	down	NA	NA	NA	NA	NA	NA	NA	NA	NA	NA	NA
	Cluster-27241.78061	3.61	3.1	2.11	0.9	0.67	1.01	3.16	6.28	6.22	51.56	26.28	17.51	11.6	6.51	12.54	30.94	79.24	92.54	-1.784	0.000183322	0.000707519	down	-0.00606949	0.993943	0.997301	false	-2.54333	1.40789e-06	1.18125e-05	down	0.761672	0.102277	0.223827	false	NA	NA	NA	NA	NA	NA	NA	NA	NA	NA	NA
	Cluster-27241.99907	0	0	0	0	0	0	0.26	1.71	1.79	0	0	0	0	0	0	3.31	27.6	33.91	NA	NA	NA	NA	5.4057	0.0771305	0.211891	false	-6.68122	0.000154515	0.000920842	down	6.40331	0.000318309	0.00173286	up	NA	NA	NA	NA	NA	NA	NA	NA	NA	NA	NA
	Cluster-27241.105707	0	0	0.04	0.12	0.16	0.15	1.17	1.82	0.95	0	0	1	4	4	5	31	61	37	NA	NA	NA	NA	5.69388	0.000396149	0.00422035	up	-3.23253	6.04088e-07	5.33253e-06	down	6.55226	9.12871e-07	7.9733e-06	up	NA	NA	NA	NA	NA	NA	NA	NA	NA	NA	NA
	Cluster-27241.14192	0.8	0.81	1.55	0.41	0.87	0.74	145.71	303.74	344.12	15	9	17	7	11	12	1882.81	5026.35	6689.01	NA	NA	NA	NA	6.91969	7.00097e-05	0.00100196	up	-8.64651	5.55579e-77	1.99776e-74	down	7.93997	9.32303e-73	2.69851e-70	up	NA	NA	NA	NA	NA	NA	NA	NA	NA	NA	NA
	Cluster-27241.78057	8.58	8.61	8.91	16.84	15.62	14.81	15.02	36.69	35.07	122.81	73.09	74.29	218.6	151.06	184.34	147.26	463.86	523.16	0.795135	5.46122e-07	3.12615e-06	false	1.3024	0.00122009	0.010326	up	-0.891768	0.0217177	0.0712959	false	1.68269	2.18075e-05	0.00015077	up	NA	NA	NA	NA	NA	NA	NA	NA	NA	NA	NA
	Cluster-27241.84003	0	0	0	0	0.13	0	3.27	8.1	7.55	0	0	0	0	1.04	0	26.03	83.67	92.4	NA	NA	NA	NA	7.09488	0.00473357	0.0298907	up	-7.39939	3.72394e-08	3.93724e-07	down	8.08578	3.07788e-09	3.97802e-08	up	NA	NA	NA	NA	NA	NA	NA	NA	NA	NA	NA
	Cluster-27241.84004	0.76	0.4	0.37	0.28	0.72	0.86	5.97	20.25	18.37	15.2	4.7	4.35	5.01	9.73	14.94	82.33	357.12	380.18	NA	NA	NA	NA	3.87565	0.00121258	0.0102718	up	-4.57847	1.93912e-12	3.68171e-11	down	4.78047	5.32332e-14	1.17161e-12	up	NA	NA	NA	NA	NA	NA	NA	NA	NA	NA	NA
