# Supplementary material for: Physiological and Transcriptomic Analysis Revealed the Molecular Mechanism of Pinus koraiensis Responses to Light
Source: Int J Mol Sci. 2022 Nov 6;23(21):13608. doi: 10.3390/ijms232113608 (PMC9653891; doi:10.3390/ijms232113608)
Supplement: Supplementary file 1 [file ijms-23-13608-s001.zip › Table S11 Statistics of differentially expressed genes involved in Circadian rhythm - plant.xlsx]

## Sheet: Sheet1
Supplemental Table S11. Statistics of differentially expressed genes involved in Circadian rhythm - plant
Family	ID	TCK-1_fpkm	TCK-2_fpkm	TCK-3_fpkm	TIn4-1_fpkm	TIn4-2_fpkm	TIn4-3_fpkm	TL4-1_fpkm	TL4-2_fpkm	TL4-3_fpkm	TCK-1_count	TCK-2_count	TCK-3_count	TIn4-1_count	TIn4-2_count	TIn4-3_count	TL4-1_count	TL4-2_count	TL4-3_count	TCK_vs_TIn4_log2FoldChange	TCK_vs_TIn4_pvalue	TCK_vs_TIn4_padj	TCK_vs_TIn4_regulated	TCK_vs_TL4TIn4_log2FoldChange	TCK_vs_TL4TIn4_pvalue	TCK_vs_TL4TIn4_padj	TCK_vs_TL4TIn4_regulated	TL4_vs_TIn4_log2FoldChange	TL4_vs_TIn4_pvalue	TL4_vs_TIn4_padj	TL4_vs_TIn4_regulated	TCK_vs_TL4_log2FoldChange	TCK_vs_TL4_pvalue	TCK_vs_TL4_padj	TCK_vs_TL4_regulated	length	KEGG	Nr	Swissprot	TrEMBL	KOG	GO	Pfam	TF-Family	TF-Category	TF-Classification
casein kinase II subunit alpha	Cluster-27241.88167	0.58	0.72	0.72	3.01	2.95	3.52	1.25	1.6	2.14	30.87	22.98	22.86	147.34	107.53	162.67	47.04	75.64	117.8	2.18393	1.7014e-17	2.83696e-16	up	1.77073	9.52073e-06	0.000179228	up	0.91562	0.00204978	0.00945942	false	1.25365	0.00121689	0.00572057	up	NA	NA	NA	NA	NA	NA	NA	NA	NA	NA	NA
	Cluster-27241.90564	1.35	1.81	0.95	2.35	2.23	2	0.11	0.2	0.13	71.13	57.02	30.14	113.66	80.47	91.33	3.96	9.36	7.2	0.606495	0.0212803	0.0500013	false	-0.315595	0.754822	0.86681	false	3.91814	9.23031e-19	3.24178e-17	up	-3.31396	3.813e-09	4.85706e-08	down	NA	NA	NA	NA	NA	NA	NA	NA	NA	NA	NA
casein kinase II subunit beta	Cluster-27241.64284	0	0.29	0	0	0.21	0	0.41	1.78	1.9	0	4.69	0	0	4.01	0	7.96	43.53	54.25	NA	NA	NA	NA	2.7859	0.194221	0.388735	false	-4.38412	0.0020662	0.00952647	down	3.7551	0.0112192	0.0384318	up	1181	K03115 casein kinase II subunit beta | (RefSeq) putative casein kinase II subunit beta-4 isoform X1 (A)	unknown [Picea sitchensis]	CSK2E_ARATH RecName: Full=Putative casein kinase II subunit beta-4; Short=CK II beta-4;	B8LPQ3_PICSI RecName: Full=Casein kinase II subunit beta {ECO:0000256|RuleBase:RU361268}; Short=CK II beta {ECO:0000256|RuleBase:RU361268};	Casein kinase II, beta subunit	GO:0005737,cytoplasm; GO:0005829,cytosol; GO:0005634,nucleus; GO:0005956,protein kinase CK2 complex; GO:0019887,protein kinase regulator activity; GO:0004674,protein serine/threonine kinase activity; GO:0007623,circadian rhythm; GO:0048573,photoperiodism, flowering; GO:0042753,positive regulation of circadian rhythm; GO:0003674,molecular_function; GO:0098772,molecular function regulator; GO:00192…	Casein kinase II regulatory subunit	--	--	--
	Cluster-27241.85640	0.37	0.37	0.19	0.58	0.93	0.58	1.17	1.09	0.63	20.93	12.39	6.35	29.79	35.42	28.11	46.12	54.41	36.38	1.08495	0.0264679	0.0602515	false	1.34168	0.00277319	0.0197045	up	-0.476283	0.29946	0.514816	false	1.57377	0.00431985	0.0171955	up	NA	NA	NA	NA	NA	NA	NA	NA	NA	NA	NA
chalcone synthase	Cluster-27241.78084	0.31	0.17	0.18	0.69	0.77	0.94	130.05	132.28	132.87	3	1	1	6.01	5	8	851.5	1132	1353.09	NA	NA	NA	NA	8.14987	2.76525e-06	6.04858e-05	up	-7.36485	2.18745e-93	1.05594e-90	down	9.0608	1.09783e-42	1.29944e-40	up	NA	NA	NA	NA	NA	NA	NA	NA	NA	NA	NA
	Cluster-27241.46657	0.46	0.58	0.4	1.01	1.02	1.18	15.23	19.84	23.35	4	3	2	7.99	6	9	89.5	153	214.91	NA	NA	NA	NA	4.3737	0.00020753	0.00248003	up	-4.19264	6.8379e-21	2.82155e-19	down	5.30795	8.55596e-19	2.94996e-17	up	550	K00660 chalcone synthase [EC:2.3.1.74] | (RefSeq) chalcone synthase 2-like (A)	unknown [Picea sitchensis]	CHS7_PICMA RecName: Full=Chalcone synthase 7; EC=2.3.1.74; AltName: Full=Naregenin-chalcone synthase 7;	Q2EN92_ABIAL SubName: Full=Chalcone synthase {ECO:0000313|EMBL:ABD24255.1};	--	GO:0016210,naringenin-chalcone synthase activity; GO:0009813,flavonoid biosynthetic process; GO:0003674,molecular_function; GO:0003824,catalytic activity; GO:0016740,transferase activity; GO:0016746,transferase activity, transferring acyl groups; GO:0016747,transferase activity, transferring acyl groups other than amino-acyl groups; GO:0008152,metabolic process; GO:0008150,biological_process; GO:…	--	--	--	--
	Cluster-27241.71770	3.9	7.39	6.49	0.53	3.04	1.63	205.36	720.87	540.32	139.68	157.29	138.26	17.19	74.09	50.71	5144.07	22879.8	20009.6	-1.84319	0.00992217	0.0258166	down	5.31143	0.0018661	0.0145063	up	-8.15119	7.60447e-38	7.74491e-36	down	6.30602	2.3924e-42	2.75598e-40	up	NA	NA	NA	NA	NA	NA	NA	NA	NA	NA	NA
	Cluster-27241.48518	1.94	2.52	0	4.01	2.3	0.54	204.51	211.03	206.24	4	3	0	7	3	1	253	368	461	NA	NA	NA	NA	6.01985	0.000160989	0.00199806	up	-6.52367	6.93091e-39	7.3788e-37	down	6.94363	2.24083e-31	1.70382e-29	up	309	K00660 chalcone synthase [EC:2.3.1.74] | (RefSeq) CHS13; chalcone synthase 13 (A)	unknown [Picea sitchensis]	CHS7_PICMA RecName: Full=Chalcone synthase 7; EC=2.3.1.74; AltName: Full=Naregenin-chalcone synthase 7;	Q2EN92_ABIAL SubName: Full=Chalcone synthase {ECO:0000313|EMBL:ABD24255.1};	--	GO:0016210,naringenin-chalcone synthase activity; GO:0009813,flavonoid biosynthetic process; GO:0003674,molecular_function; GO:0003824,catalytic activity; GO:0016740,transferase activity; GO:0016746,transferase activity, transferring acyl groups; GO:0016747,transferase activity, transferring acyl groups other than amino-acyl groups; GO:0008152,metabolic process; GO:0008150,biological_process; GO:…	--	--	--	--
	Cluster-27241.84528	6.43	3.35	6.39	1.28	3.01	3.49	18.64	17.84	23.29	23	7	12	4	7	11	42	55	89	NA	NA	NA	NA	1.0309	0.263811	0.470424	false	-2.94136	1.1107e-07	1.09451e-06	down	1.83803	6.58716e-05	0.000413275	up	NA	NA	NA	NA	NA	NA	NA	NA	NA	NA	NA
	Cluster-27241.84529	0.94	1.31	2.34	2.86	2.91	5.34	213.62	196.17	225.37	2.69	2.18	3.43	7.07	5.37	13.56	379.1	481.84	694.9	NA	NA	NA	NA	6.23394	4.63752e-06	9.56181e-05	up	-5.80051	3.02829e-56	6.31443e-54	down	7.26026	2.05651e-39	2.1465e-37	up	NA	NA	NA	NA	NA	NA	NA	NA	NA	NA	NA
	Cluster-27241.71779	4.49	6.63	5.43	3.58	5.81	4.57	39.57	49.11	46.06	191.35	167.89	137.87	139.47	168.44	168.73	1181.56	1854.85	2027.53	-0.317164	0.166423	0.275517	false	2.09949	0.0111353	0.0558583	false	-3.28201	1.26536e-45	1.82e-43	down	2.9688	8.48343e-47	1.1282e-44	up	NA	NA	NA	NA	NA	NA	NA	NA	NA	NA	NA
	Cluster-27241.71778	93.5	82.31	57.45	5.83	6.34	4.99	82.18	63.34	104.53	3729.12	1952.6	1366.69	212.6	172.12	172.42	2297.26	2240.77	4311.6	-3.83923	1.73461e-65	1.42305e-63	down	-0.871966	0.403799	0.609033	false	-3.87097	8.68171e-66	2.20097e-63	down	0.0356378	0.888614	0.938446	false	NA	NA	NA	NA	NA	NA	NA	NA	NA	NA	NA
	Cluster-27241.59995	2.6	2.65	3.7	7.57	9.75	8.5	234.49	226.51	239.79	20	12	16	52	50	57	1197	1526	1936	1.4891	3.74061e-05	0.000162445	up	5.29045	9.5773e-07	2.3505e-05	up	-4.7723	2.7464e-170	5.3767e-167	down	6.26861	6.53203e-144	8.65343e-141	up	513	K00660 chalcone synthase [EC:2.3.1.74] | (RefSeq) chalcone synthase (A)	unknown [Picea sitchensis]	CHS7_PICMA RecName: Full=Chalcone synthase 7; EC=2.3.1.74; AltName: Full=Naregenin-chalcone synthase 7;	Q2EN92_ABIAL SubName: Full=Chalcone synthase {ECO:0000313|EMBL:ABD24255.1};	--	GO:0016210,naringenin-chalcone synthase activity; GO:0009813,flavonoid biosynthetic process; GO:0003674,molecular_function; GO:0003824,catalytic activity; GO:0016740,transferase activity; GO:0016746,transferase activity, transferring acyl groups; GO:0016747,transferase activity, transferring acyl groups other than amino-acyl groups; GO:0008152,metabolic process; GO:0008150,biological_process; GO:…	--	--	--	--
	Cluster-27241.67714	72.82	75.81	71.41	9.4	12.41	9.3	414.49	443.63	489.99	907.99	559.71	515.19	106	104.31	100.88	3519.79	4878.98	6374.66	-2.90445	1.04154e-127	2.05172e-125	down	1.58702	0.221897	0.423014	false	-5.45098	1.50623e-210	4.82527e-207	down	2.55685	1.38488e-99	7.69367e-97	up	NA	NA	NA	NA	NA	NA	NA	NA	NA	NA	NA
	Cluster-27241.83739	23.27	42.38	39.97	14.37	13.84	4.8	123.4	209.57	232.65	66.77	70.71	58.7	35.53	25.56	12.18	218.98	514.76	717.36	-1.72263	4.05912e-05	0.000175154	down	1.48879	0.15024	0.330189	false	-4.13995	7.76207e-18	2.50943e-16	down	2.41712	1.0525e-09	1.43404e-08	up	NA	NA	NA	NA	NA	NA	NA	NA	NA	NA	NA
	Cluster-27241.70122	1.49	0	0	16.74	17.45	6.52	770.65	1153.9	1189.31	1	0	0	9	7	4	280	628	899	NA	NA	NA	NA	9.30628	6.28885e-07	1.61408e-05	up	-6.34662	5.63727e-37	5.51811e-35	down	10.2832	8.63312e-17	2.53503e-15	up	NA	NA	NA	NA	NA	NA	NA	NA	NA	NA	NA
	Cluster-27241.78080	34.74	31.18	23.72	20.5	22.97	17.19	181.84	184.27	187.53	105.93	55.34	37.29	54.02	45.22	46.34	344.74	481.94	613.49	-0.637168	0.0254286	0.0582496	false	1.72814	0.0401059	0.136176	false	-3.20635	8.96963e-54	1.68128e-51	down	2.56726	3.16047e-26	1.79933e-24	up	NA	NA	NA	NA	NA	NA	NA	NA	NA	NA	NA
	Cluster-27241.78081	41.65	56.42	45.31	19.31	29.58	25.73	73.92	91.37	71.74	39.82	30.88	19	15.03	17.18	22.27	39.42	71.69	76.17	-0.967006	0.0240924	0.0555768	false	0.0966411	0.871668	0.932944	false	-1.67144	7.22304e-05	0.000460692	down	0.707452	0.0665485	0.161635	false	NA	NA	NA	NA	NA	NA	NA	NA	NA	NA	NA
	Cluster-27241.67717	33.32	37.55	40.54	37.34	36.41	27.01	500.37	820.23	816.5	62.53	40.7	36.85	59.12	43.06	45.24	558.73	1297.87	1666.44	-0.182922	0.493104	0.626965	false	3.32036	0.00128808	0.0107928	up	-4.44211	1.75826e-40	2.03146e-38	down	4.25792	1.08581e-38	1.10978e-36	up	NA	NA	NA	NA	NA	NA	NA	NA	NA	NA	NA
	Cluster-27241.68655	91.34	95.39	92.95	34.99	40.64	43.21	420.86	602.68	646.83	127.81	76.79	60.39	40.68	35.28	54.3	340.74	702.99	993.21	-1.24865	1.14216e-06	6.24071e-06	down	1.67939	0.0758501	0.209431	false	-3.82467	1.33824e-28	9.41285e-27	down	2.58014	1.25441e-16	3.6126e-15	up	NA	NA	NA	NA	NA	NA	NA	NA	NA	NA	NA
	Cluster-27241.67716	0	0	0.35	64.26	65.34	74.34	785.67	923.78	988.08	0	0	2.64	752.84	570.54	837.29	6938.07	10552.1	13341	9.25265	3.44967e-28	1.04827e-26	up	11.8671	5.06758e-15	6.25171e-13	up	-3.72596	7.23258e-113	4.99743e-110	down	12.9768	1.04198e-52	1.61666e-50	up	NA	NA	NA	NA	NA	NA	NA	NA	NA	NA	NA
	Cluster-27241.64631	182.24	179.2	165.66	71.54	79.48	84.16	140.93	161.34	174.19	980.67	566.13	487.8	340.71	282.56	396.94	492.96	756.53	992.23	-1.21468	3.8644e-27	1.12389e-25	down	-0.617581	0.0683801	0.195651	false	-1.01764	2.67673e-07	2.48945e-06	down	-0.191465	0.259828	0.433398	false	434	K00660 chalcone synthase [EC:2.3.1.74] | (RefSeq) chalcone synthase 9-like (A)	pinocembrin chalcone synthase [Pinus densiflora]	CHSY_PINST RecName: Full=Chalcone synthase; EC=2.3.1.74; AltName: Full=Naringenin-chalcone synthase;	T1WVA3_9SPER SubName: Full=Pinocembrin chalcone synthase {ECO:0000313|EMBL:AGU43679.1};	--	GO:0016210,naringenin-chalcone synthase activity; GO:0009813,flavonoid biosynthetic process; GO:0003674,molecular_function; GO:0003824,catalytic activity; GO:0016740,transferase activity; GO:0016746,transferase activity, transferring acyl groups; GO:0016747,transferase activity, transferring acyl groups other than amino-acyl groups; GO:0008152,metabolic process; GO:0008150,biological_process; GO:…	--	--	--	--
	Cluster-27241.71760	134.88	147.77	160.54	74.4	87.34	87.43	409.48	616.31	541.11	3442.01	2240.39	2424.74	1732.3	1513.73	1935.41	7270.58	13930.6	14313	-0.898956	2.55524e-22	5.79497e-21	false	0.96998	0.158494	0.341277	false	-2.65791	3.12964e-37	3.11541e-35	down	1.76	2.93542e-19	1.04558e-17	up	NA	NA	NA	NA	NA	NA	NA	NA	NA	NA	NA
	Cluster-27241.62520	96.94	188.81	179.03	56.48	101.71	103.47	386.69	947.45	597.56	1266.52	1461.21	1356.27	667.94	896.42	1176.04	3447.54	10923.1	8141.73	-0.886633	0.033733	0.0741112	false	1.18403	0.128325	0.297353	false	-2.88824	8.82456e-13	1.74996e-11	down	2.00095	4.54909e-07	4.17725e-06	up	694	K00660 chalcone synthase [EC:2.3.1.74] | (RefSeq) chalcone synthase 1-like (A)	pinocembrin chalcone synthase [Pinus massoniana]	CHSY_PINST RecName: Full=Chalcone synthase; EC=2.3.1.74; AltName: Full=Naringenin-chalcone synthase;	T1WVA3_9SPER SubName: Full=Pinocembrin chalcone synthase {ECO:0000313|EMBL:AGU43679.1};	--	GO:0016210,naringenin-chalcone synthase activity; GO:0009813,flavonoid biosynthetic process; GO:0003674,molecular_function; GO:0003824,catalytic activity; GO:0016740,transferase activity; GO:0016746,transferase activity, transferring acyl groups; GO:0016747,transferase activity, transferring acyl groups other than amino-acyl groups; GO:0008152,metabolic process; GO:0008150,biological_process; GO:…	Chalcone and stilbene synthases, C-terminal domain	--	--	--
	Cluster-27241.71072	9.96	22.99	37.77	77.1	116.59	102.39	7.11	13.83	8.86	406.43	558.13	919.55	2879.76	3240.4	3620.52	203.5	500.67	373.69	1.98987	0.000410716	0.00148231	up	1.11772	0.194789	0.389452	false	3.30312	3.62048e-26	2.17346e-24	up	-1.314	0.00925559	0.0327422	down	NA	NA	NA	NA	NA	NA	NA	NA	NA	NA	NA
	Cluster-27241.71073	187.49	199.46	202.87	95.87	106.65	102.5	204.03	269.02	303.74	8979.05	5683.22	5807.23	4204.82	3480.36	4251.86	6862.59	11432.2	15032.1	-1.02372	4.26149e-64	3.39736e-62	down	-0.196329	0.629339	0.784422	false	-1.35337	3.6187e-13	7.49673e-12	down	0.331164	0.0593336	0.147687	false	NA	NA	NA	NA	NA	NA	NA	NA	NA	NA	NA
	Cluster-27241.70123	69.94	67.98	75.74	159.76	79.46	86.89	2969.63	2980.36	3377.69	20	11	8	35	13	23	428	666	1115	NA	NA	NA	NA	4.53633	6.3281e-05	0.000923884	up	-4.85362	1.11881e-41	1.35951e-39	down	5.47119	7.042e-49	9.94077e-47	up	NA	NA	NA	NA	NA	NA	NA	NA	NA	NA	NA
	Cluster-27241.68657	135.09	175.11	142.73	106.22	106.15	147.21	272.4	663.94	638.7	189.03	140.96	92.74	123.49	92.16	185.02	220.54	774.44	980.73	-0.331642	0.189238	0.304815	false	1.10698	0.103222	0.257291	false	-2.14828	4.44126e-06	3.44347e-05	down	1.81368	3.95423e-05	0.000259477	up	NA	NA	NA	NA	NA	NA	NA	NA	NA	NA	NA
	Cluster-27241.71774	315.27	347.48	343.71	137.66	127.41	133.64	660.02	944.62	889.76	12866.4	8434.86	8368.43	5141.41	3541	4725.71	18883.6	34195.9	37547.9	-1.40754	4.96501e-154	1.24611e-151	down	0.455742	0.503451	0.692641	false	-2.65231	1.29674e-50	2.22907e-48	down	1.24492	9.58112e-13	1.84777e-11	up	NA	NA	NA	NA	NA	NA	NA	NA	NA	NA	NA
	Cluster-27241.71776	205.88	392.56	421.47	110.7	177.17	181.79	457.85	1804.4	1108.86	5358.43	6070.43	6495.23	2629.01	3132.29	4104.04	8294.52	41600	29910.7	-1.18664	0.00145087	0.00467551	down	0.852683	0.369	0.576962	false	-2.8524	3.00739e-09	3.78896e-08	down	1.66318	0.000734527	0.0036688	up	NA	NA	NA	NA	NA	NA	NA	NA	NA	NA	NA
	Cluster-27241.71775	143.22	166.02	166.59	152.23	169.6	170.24	627	885.53	797.07	6559.14	4523.62	4558.39	6384.29	5292.17	6754.05	20158.7	35984	37730.9	-0.0230637	0.770955	0.852418	false	1.48891	0.0130322	0.0624448	false	-2.23622	7.197e-36	6.72719e-34	down	2.21412	4.21434e-36	3.80994e-34	up	NA	NA	NA	NA	NA	NA	NA	NA	NA	NA	NA
	Cluster-27241.71771	397.29	412.35	305.18	244.38	309.38	227.64	500.76	873.14	1052.5	298.77	176.99	97.06	147.65	139.52	155.72	205.34	533.38	885.68	-0.548687	0.0205641	0.0485287	false	0.532222	0.35964	0.568593	false	-1.68435	4.68878e-05	0.000309589	down	1.14142	0.0102364	0.0356325	up	NA	NA	NA	NA	NA	NA	NA	NA	NA	NA	NA
	Cluster-27241.68060	355.13	303.19	256.67	285.6	264.02	359.89	733.37	657.68	579.16	158.83	76.99	44.99	99.92	68.94	147.88	170.93	233.87	294.8	-0.00304285	0.992465	0.995644	false	0.621221	0.150301	0.330304	false	-1.05306	0.00032822	0.00183154	down	1.05398	0.000835494	0.00410935	up	NA	NA	NA	NA	NA	NA	NA	NA	NA	NA	NA
	Cluster-27241.68464	427.87	326.87	404.23	421.88	412.53	414.95	7096.03	8079.17	8919.34	118	51	41	89	65	106	984	1739	2843	0.125313	0.640002	0.752909	false	3.49658	0.000470291	0.00485254	up	-4.27966	8.36159e-45	1.16005e-42	down	4.41341	3.54516e-42	4.03002e-40	up	NA	NA	NA	NA	NA	NA	NA	NA	NA	NA	NA
	Cluster-27241.67715	1121.59	1121.08	1072.59	893.59	926.77	918.84	2441.5	2757.91	2401.73	487.42	276.55	181.94	303.36	234.82	367.05	551.64	951.8	1188.96	-0.264889	0.152116	0.256328	false	0.641693	0.169292	0.355691	false	-1.45634	2.33271e-10	3.41656e-09	down	1.19581	2.72215e-06	2.20253e-05	up	NA	NA	NA	NA	NA	NA	NA	NA	NA	NA	NA
cryptochrome 1	Cluster-27241.81364	0.24	0.53	0.78	1.74	1.3	1.8	0.99	0.69	0.54	35.18	47.2	70.58	239.53	132.26	233.18	104.55	91.77	83.03	1.58383	1.88769e-05	8.60932e-05	up	1.10662	0.030871	0.114379	false	1.12707	0.000443775	0.00241218	up	0.454559	0.406331	0.582764	false	NA	NA	NA	NA	NA	NA	NA	NA	NA	NA	NA
E3 ubiquitin-protein ligase RFWD2	Cluster-27241.26923	0.9	1.05	0.69	0.82	0.57	0.25	0.52	0.33	0.33	40.92	28.28	18.8	33.83	17.54	9.95	16.39	13.28	15.62	-0.754876	0.123533	0.217104	false	-0.993143	0.0276001	0.105952	false	NA	NA	NA	NA	-1.25945	0.00919108	0.0325496	down	1774	K10143 E3 ubiquitin-protein ligase RFWD2 [EC:2.3.2.27] | (RefSeq) WD repeat-containing protein RUP2 (A)	PREDICTED: WD repeat-containing protein RUP2 [Nicotiana tomentosiformis]	RUP1_ARATH RecName: Full=WD repeat-containing protein RUP1; AltName: Full=Protein EARLY FLOWERING BY OVEREXPRESSION 1; AltName: Full=Protein REPRESSOR OF UV-B PHOTOMORPHOGENESIS 1;	A0A2G5CJJ6_AQUCA SubName: Full=Uncharacterized protein {ECO:0000313|EMBL:PIA31439.1};	--	GO:0080008,Cul4-RING E3 ubiquitin ligase complex; GO:0005829,cytosol; GO:0005634,nucleus; GO:0009908,flower development; GO:0043496,regulation of protein homodimerization activity; GO:0010218,response to far red light; GO:0010114,response to red light; GO:0010224,response to UV-B; GO:0000003,reproduction; GO:0003006,developmental process involved in reproduction; GO:0007275,multicellular organism…	WD domain, G-beta repeat	--	--	--
MYB-related transcription factor LHY	Cluster-27241.129229	0	0	0	3.85	1.97	1.96	0	0	0	0	0	0	67.31	25.68	32.65	0	0	0	7.50762	6.32811e-09	4.68653e-08	up	6.49116	0.0270158	0.104467	false	7.85941	6.32915e-09	7.58874e-08	up	NA	NA	NA	NA	NA	NA	NA	NA	NA	NA	NA	NA	NA	NA	NA
	Cluster-27241.45171	1.01	0.92	0.47	2.37	1.99	1.78	1.75	0.95	0.94	110.42	59.72	31.04	237.78	148.29	168.59	134.68	91.95	105.88	1.26669	8.4075e-07	4.67832e-06	up	0.942471	0.0158701	0.0718299	false	0.758084	0.0220575	0.0722315	false	0.530536	0.236653	0.407177	false	3912	K12133 MYB-related transcription factor LHY | (RefSeq) protein LHY isoform X1 (A)	unknown [Picea sitchensis]	LHY_ARATH RecName: Full=Protein LHY {ECO:0000303|PubMed:9657154}; AltName: Full=MYB-related transcription factor LHY {ECO:0000303|PubMed:9657154}; AltName: Full=Protein LATE ELONGATED HYPOCOTYL {ECO:0000303|PubMed:9657154};	A9NW27_PICSI SubName: Full=Uncharacterized protein {ECO:0000313|EMBL:ABK24838.1};	Zuotin and related molecular chaperones (DnaJ superfamily), contains DNA-binding domains	GO:0005634,nucleus; GO:0003700,DNA-binding transcription factor activity; GO:0044212,transcription regulatory region DNA binding; GO:0007623,circadian rhythm; GO:0048574,long-day photoperiodism, flowering; GO:0042754,negative regulation of circadian rhythm; GO:0043433,negative regulation of DNA-binding transcription factor activity; GO:0042752,regulation of circadian rhythm; GO:0006355,regulation…	Myb-like DNA-binding domain	MYB-related	TF	MYB->MYB-related
	Cluster-27241.51360	0.76	0.61	0.7	1.08	2.1	2.26	3.95	2.11	1.37	92.3	44.06	50.7	119.92	173.56	236.58	337.72	226.54	170.91	1.32171	1.50016e-05	6.95138e-05	up	1.56041	0.000142978	0.00181158	up	-0.443018	0.368853	0.587242	false	1.77814	7.79717e-05	0.000482439	up	4306	K12133 MYB-related transcription factor LHY | (RefSeq) protein LHY (A)	putative LHY [Cryptomeria japonica]	RVE1_ARATH RecName: Full=Protein REVEILLE 1;	A0A0C9S8A2_9SPER SubName: Full=TSA: Wollemia nobilis Ref_Wollemi_Transcript_11910_4056 transcribed RNA sequence {ECO:0000313|EMBL:JAG87628.1};	Zuotin and related molecular chaperones (DnaJ superfamily), contains DNA-binding domains	GO:0005634,nucleus; GO:0003677,DNA binding; GO:0003700,DNA-binding transcription factor activity; GO:0009851,auxin biosynthetic process; GO:0009734,auxin-activated signaling pathway; GO:0007623,circadian rhythm; GO:0010600,regulation of auxin biosynthetic process; GO:0006355,regulation of transcription, DNA-templated; GO:0006351,transcription, DNA-templated; GO:0003674,molecular_function; GO:0003…	--	MYB-related	TF	MYB->MYB-related
	Cluster-27241.62976	1.07	1.07	1.02	3.48	2.16	2.85	7.09	5.12	5.48	92.3	54.68	52.61	274.43	126.64	211.86	430.11	390.43	485.78	1.3506	4.16625e-10	3.57279e-09	up	1.96921	3.77721e-07	1.02339e-05	up	-1.05906	1.90828e-05	0.00013487	down	2.41213	6.30024e-26	3.54584e-24	up	3134	K12133 MYB-related transcription factor LHY | (RefSeq) protein LHY-like isoform X1 (A)	CCA1-like protein [Picea abies]	RVE1_ARATH RecName: Full=Protein REVEILLE 1;	M4Q9T9_PICAB SubName: Full=CCA1-like protein {ECO:0000313|EMBL:AGH20047.1};	Zuotin and related molecular chaperones (DnaJ superfamily), contains DNA-binding domains	GO:0005634,nucleus; GO:0003677,DNA binding; GO:0003700,DNA-binding transcription factor activity; GO:0009851,auxin biosynthetic process; GO:0009734,auxin-activated signaling pathway; GO:0007623,circadian rhythm; GO:0010600,regulation of auxin biosynthetic process; GO:0006355,regulation of transcription, DNA-templated; GO:0006351,transcription, DNA-templated; GO:0003674,molecular_function; GO:0003…	Myb-like DNA-binding domain	MYB-related	TF	MYB->MYB-related
	Cluster-27241.62977	0	0	0	0.35	0.77	0.5	2	0.43	0.59	0	0	0	25.92	42.93	35.22	114.82	30.86	49.66	7.32815	2.55223e-08	1.7369e-07	up	7.8439	1.17152e-08	4.47912e-07	up	-0.895111	0.208758	0.407467	false	8.23993	3.24526e-08	3.63394e-07	up	2980	K12133 MYB-related transcription factor LHY | (RefSeq) protein LHY-like isoform X1 (A)	CCA1-like protein [Picea abies]	RVE1_ARATH RecName: Full=Protein REVEILLE 1;	M4Q9T9_PICAB SubName: Full=CCA1-like protein {ECO:0000313|EMBL:AGH20047.1};	Zuotin and related molecular chaperones (DnaJ superfamily), contains DNA-binding domains	GO:0005634,nucleus; GO:0003677,DNA binding; GO:0003700,DNA-binding transcription factor activity; GO:0009851,auxin biosynthetic process; GO:0009734,auxin-activated signaling pathway; GO:0007623,circadian rhythm; GO:0010600,regulation of auxin biosynthetic process; GO:0006355,regulation of transcription, DNA-templated; GO:0006351,transcription, DNA-templated; GO:0003674,molecular_function; GO:0003…	Myb-like DNA-binding domain	MYB-related	TF	MYB->MYB-related
	Cluster-27241.45170	0.77	0.54	1.36	0.16	0.34	0.52	0.72	0	0.29	77.74	32.63	82.26	14.72	23.62	45.3	51.44	0	30.29	-1.45128	0.00314858	0.00934642	down	-1.48365	0.121352	0.286686	false	0.0552626	0.967359	0.986137	false	-1.49163	0.22867	0.397393	false	3626	K12133 MYB-related transcription factor LHY | (RefSeq) protein LHY isoform X1 (A)	unknown [Picea sitchensis]	LHY_ARATH RecName: Full=Protein LHY {ECO:0000303|PubMed:9657154}; AltName: Full=MYB-related transcription factor LHY {ECO:0000303|PubMed:9657154}; AltName: Full=Protein LATE ELONGATED HYPOCOTYL {ECO:0000303|PubMed:9657154};	A9NW27_PICSI SubName: Full=Uncharacterized protein {ECO:0000313|EMBL:ABK24838.1};	Zuotin and related molecular chaperones (DnaJ superfamily), contains DNA-binding domains	GO:0005634,nucleus; GO:0003700,DNA-binding transcription factor activity; GO:0044212,transcription regulatory region DNA binding; GO:0007623,circadian rhythm; GO:0048574,long-day photoperiodism, flowering; GO:0042754,negative regulation of circadian rhythm; GO:0043433,negative regulation of DNA-binding transcription factor activity; GO:0042752,regulation of circadian rhythm; GO:0006355,regulation…	Myb-like DNA-binding domain	MYB-related	TF	MYB->MYB-related
	Cluster-27241.51359	4.97	6.57	4.81	11.88	8.37	9.47	22.42	10.22	11.44	690.25	543.9	402.49	1516.5	794.61	1138.31	2202.99	1261.97	1638.09	0.789502	2.90105e-08	1.95609e-07	false	1.09591	0.00047026	0.00485254	up	-0.572203	0.0869669	0.215379	false	1.36606	7.18408e-05	0.000447627	up	4908	K12133 MYB-related transcription factor LHY | (RefSeq) protein LHY (A)	putative LHY [Cryptomeria japonica]	CCA1_ARATH RecName: Full=Protein CCA1 {ECO:0000303|PubMed:9144958}; AltName: Full=MYB-related transcription factor CCA1 {ECO:0000303|PubMed:9144958}; AltName: Full=Protein CIRCADIAN CLOCK ASSOCIATED 1 {ECO:0000303|PubMed:9144958};	A0A0C9S8A2_9SPER SubName: Full=TSA: Wollemia nobilis Ref_Wollemi_Transcript_11910_4056 transcribed RNA sequence {ECO:0000313|EMBL:JAG87628.1};	Zuotin and related molecular chaperones (DnaJ superfamily), contains DNA-binding domains	GO:0005634,nucleus; GO:0003677,DNA binding; GO:0003700,DNA-binding transcription factor activity; GO:0043565,sequence-specific DNA binding; GO:0007623,circadian rhythm; GO:0048574,long-day photoperiodism, flowering; GO:0042754,negative regulation of circadian rhythm; GO:0045892,negative regulation of transcription, DNA-templated; GO:0045893,positive regulation of transcription, DNA-templated; GO:…	Myb-like DNA-binding domain	MYB-related	TF	MYB->MYB-related
	Cluster-27241.77986	0	0	0.83	5.63	5.14	7.32	0	0	0	0	0	27.32	284.37	193.29	349.61	0	0	0	4.38322	0.0519071	0.10666	false	3.36628	0.298302	0.507244	false	10.6082	3.03303e-18	1.01022e-16	up	NA	NA	NA	NA	NA	NA	NA	NA	NA	NA	NA	NA	NA	NA	NA
phytochrome A	Cluster-27241.103266	0.57	0.37	0.5	0.71	0.84	0.81	1.71	1.43	1.38	36	14	19	41	36	44	76	80	90	0.608484	0.0866603	0.163024	false	1.16524	0.00471936	0.0298243	up	-0.945883	0.00104177	0.00518003	false	1.56042	1.00761e-05	7.36707e-05	up	2366	K12120 phytochrome A | (RefSeq) phytochrome A isoform X1 (A)	phytochrome [Pinus parviflora]	PHYC_ORYSI RecName: Full=Phytochrome C;	A0A059UJQ7_PINPR RecName: Full=Phytochrome {ECO:0000256|PIRNR:PIRNR000084};	--	GO:0005622,intracellular; GO:0000155,phosphorelay sensor kinase activity; GO:0009881,photoreceptor activity; GO:0042803,protein homodimerization activity; GO:0009584,detection of visible light; GO:0018298,protein-chromophore linkage; GO:0017006,protein-tetrapyrrole linkage; GO:0009585,red, far-red light phototransduction; GO:0006355,regulation of transcription, DNA-templated; GO:0006351,transcrip…	PAS fold	--	--	--
phytochrome B	Cluster-27241.53765	4.15	2.95	2.32	6.69	6.77	5.9	4.2	1.85	3.05	494.69	209.8	166.86	732.75	551.62	608.85	354.62	196.27	375.65	0.954361	1.39995e-08	9.85728e-08	false	0.514976	0.209914	0.408455	false	1.08779	0.000430111	0.00234478	up	-0.114926	0.757972	0.860216	false	4252	K12121 phytochrome B | (RefSeq) phytochrome 1-like isoform X1 (A)	phytochrome, partial [Pinus parviflora]	PHY_PICAB RecName: Full=Phytochrome;	A0A059UGM3_PINPR SubName: Full=Phytochrome {ECO:0000313|EMBL:AHZ63970.1}; Flags: Fragment;	--	GO:0005622,intracellular; GO:0000155,phosphorelay sensor kinase activity; GO:0009881,photoreceptor activity; GO:0042803,protein homodimerization activity; GO:0009584,detection of visible light; GO:0018298,protein-chromophore linkage; GO:0017006,protein-tetrapyrrole linkage; GO:0009585,red, far-red light phototransduction; GO:0006355,regulation of transcription, DNA-templated; GO:0006351,transcrip…	Phytochrome region	--	--	--
	Cluster-27241.103267	1.16	1.26	1.53	1.83	1.41	1.68	4.85	4.04	4.43	82	53	65	119	68	103	242	254	324	0.260962	0.250492	0.377801	false	1.13557	0.0168723	0.0750112	false	-1.43373	2.63513e-13	5.54384e-12	down	1.69872	5.77621e-14	1.26723e-12	up	2629	K12121 phytochrome B | (RefSeq) hypothetical protein (A)	phytochrome [Pinus parviflora]	PHY_PICAB RecName: Full=Phytochrome;	A0A059UJQ7_PINPR RecName: Full=Phytochrome {ECO:0000256|PIRNR:PIRNR000084};	--	GO:0005622,intracellular; GO:0000155,phosphorelay sensor kinase activity; GO:0009881,photoreceptor activity; GO:0042803,protein homodimerization activity; GO:0009584,detection of visible light; GO:0018298,protein-chromophore linkage; GO:0017006,protein-tetrapyrrole linkage; GO:0009585,red, far-red light phototransduction; GO:0006355,regulation of transcription, DNA-templated; GO:0006351,transcrip…	Phytochrome region	--	--	--
	Cluster-27241.59280	2.73	3.12	3.86	1.51	1.68	1.6	6.74	4.56	3.39	329.31	224.2	280.14	167.25	138.38	167.15	574.38	488.73	421.35	-1.09182	8.29974e-11	7.715e-10	down	-0.0716612	0.889772	0.943783	false	-1.62078	7.66174e-08	7.73174e-07	down	0.531313	0.0988959	0.218385	false	4296	K12121 phytochrome B | (RefSeq) phytochrome 1-like isoform X1 (A)	phytochrome, partial [Pinus parviflora]	PHY_PICAB RecName: Full=Phytochrome;	A0A059UGM3_PINPR SubName: Full=Phytochrome {ECO:0000313|EMBL:AHZ63970.1}; Flags: Fragment;	--	GO:0005622,intracellular; GO:0000155,phosphorelay sensor kinase activity; GO:0009881,photoreceptor activity; GO:0042803,protein homodimerization activity; GO:0009584,detection of visible light; GO:0018298,protein-chromophore linkage; GO:0017006,protein-tetrapyrrole linkage; GO:0009585,red, far-red light phototransduction; GO:0006355,regulation of transcription, DNA-templated; GO:0006351,transcrip…	Phytochrome region	--	--	--
phytochrome-interacting factor 3	Cluster-27241.38118	1.22	1.59	1.23	3.18	3.27	3.08	3.14	2.94	3.45	18.6	14.4	11	44.12	33.83	41	33	39.74	55	1.19037	0.00196097	0.00611969	up	1.1935	7.29082e-05	0.00103583	up	-0.00933754	0.976579	0.990222	false	1.19959	0.00448205	0.0177632	up	769	K12126 phytochrome-interacting factor 3 | (RefSeq) transcription factor PIF3-like (A)	unknown [Picea sitchensis]	SPT_ARATH RecName: Full=Transcription factor SPATULA; AltName: Full=Basic helix-loop-helix protein 24; Short=AtbHLH24; Short=bHLH 24; AltName: Full=Transcription factor EN 99; AltName: Full=bHLH transcription factor bHLH024;	A9NSU4_PICSI SubName: Full=Uncharacterized protein {ECO:0000313|EMBL:ABK23705.1};	--	GO:0005634,nucleus; GO:0003677,DNA binding; GO:0003700,DNA-binding transcription factor activity; GO:0046983,protein dimerization activity; GO:0048440,carpel development; GO:0007623,circadian rhythm; GO:0010154,fruit development; GO:0010187,negative regulation of seed germination; GO:0009409,response to cold; GO:0010114,response to red light; GO:0006351,transcription, DNA-templated; GO:0003674,mo…	Helix-loop-helix DNA-binding domain	bHLH	TF	bHLH
	Cluster-27241.52578	2.85	2.43	0	0.89	0.31	0	0	0.08	0	43.74	22.12	0	12.4	3.2	0	0	1.06	0	-2.29373	0.1182	0.209667	false	-3.21195	0.106353	0.262435	false	NA	NA	NA	NA	-6.07966	0.00432487	0.0172095	down	771	K12126 phytochrome-interacting factor 3 | (RefSeq) transcription factor PIF3-like (A)	unknown [Picea sitchensis]	SPT_ARATH RecName: Full=Transcription factor SPATULA; AltName: Full=Basic helix-loop-helix protein 24; Short=AtbHLH24; Short=bHLH 24; AltName: Full=Transcription factor EN 99; AltName: Full=bHLH transcription factor bHLH024;	A9NSU4_PICSI SubName: Full=Uncharacterized protein {ECO:0000313|EMBL:ABK23705.1};	--	GO:0005634,nucleus; GO:0003677,DNA binding; GO:0003700,DNA-binding transcription factor activity; GO:0046983,protein dimerization activity; GO:0048440,carpel development; GO:0007623,circadian rhythm; GO:0010154,fruit development; GO:0010187,negative regulation of seed germination; GO:0009409,response to cold; GO:0010114,response to red light; GO:0006351,transcription, DNA-templated; GO:0003674,mo…	Helix-loop-helix DNA-binding domain	bHLH	TF	bHLH
zinc finger protein CONSTANS	Cluster-27241.105353	1.24	2.88	2.43	8.47	11.03	15.84	6.69	8.37	7.3	32	44	37	199	193	354	120	191	195	2.3969	2.4493e-12	2.65985e-11	up	2.08491	9.47835e-08	2.9804e-06	up	0.662046	0.0393355	0.115869	false	1.73037	1.0468e-05	7.62766e-05	up	NA	NA	NA	NA	NA	NA	NA	NA	NA	NA	NA
	Cluster-27241.70218	0.28	0.41	0.11	0.6	0.82	1.09	1.26	0.32	0.64	16.05	13.99	3.83	31.58	31.8	54.03	50.68	16.41	37.58	1.57428	0.00255486	0.00777263	up	1.47447	0.00976911	0.0507944	false	0.198869	0.750297	0.872339	false	1.39035	0.0743151	0.175937	false	NA	NA	NA	NA	NA	NA	NA	NA	NA	NA	NA
