# Supplementary material for: Physiological and Transcriptomic Analysis Revealed the Molecular Mechanism of Pinus koraiensis Responses to Light
Source: Int J Mol Sci. 2022 Nov 6;23(21):13608. doi: 10.3390/ijms232113608 (PMC9653891; doi:10.3390/ijms232113608)
Supplement: Supplementary file 1 [file ijms-23-13608-s001.zip › Table S12 Statistics of differentially expressed genes involved in Flavonoid biosynthesis.xlsx]

## Sheet: Sheet1
Supplemental Table S12. Statistics of differentially expressed genes involved in Flavonoid biosynthesis
Family	ID	TCK-1_fpkm	TCK-2_fpkm	TCK-3_fpkm	TIn4-1_fpkm	TIn4-2_fpkm	TIn4-3_fpkm	TL4-1_fpkm	TL4-2_fpkm	TL4-3_fpkm	TCK-1_count	TCK-2_count	TCK-3_count	TIn4-1_count	TIn4-2_count	TIn4-3_count	TL4-1_count	TL4-2_count	TL4-3_count	TCK_vs_TIn4_log2FoldChange	TCK_vs_TIn4_pvalue	TCK_vs_TIn4_padj	TCK_vs_TIn4_regulated	TCK_vs_TL4TIn4_log2FoldChange	TCK_vs_TL4TIn4_pvalue	TCK_vs_TL4TIn4_padj	TCK_vs_TL4TIn4_regulated	TL4_vs_TIn4_log2FoldChange	TL4_vs_TIn4_pvalue	TL4_vs_TIn4_padj	TL4_vs_TIn4_regulated	TCK_vs_TL4_log2FoldChange	TCK_vs_TL4_pvalue	TCK_vs_TL4_padj	TCK_vs_TL4_regulated	length	KEGG	Nr	Swissprot	TrEMBL	KOG	GO	Pfam	TF-Family	TF-Category	TF-Classification
anthocyanidin reductase	Cluster-27241.39067	0	0	0.22	29.68	28.05	30.89	11.16	17.96	19.84	0	0	1	216.88	152.93	219.79	60.69	128.59	169.83	8.81075	1.09744e-13	1.33994e-12	up	8.44112	9.15574e-12	6.28672e-10	up	0.838475	0.00590421	0.0236457	false	7.96736	2.74004e-10	4.05404e-09	up	529	K08695 anthocyanidin reductase [EC:1.3.1.77] | (RefSeq) anthocyanidin reductase ((2S)-flavan-3-ol-forming) (A)	unknown [Picea sitchensis]	ANR_GINBI RecName: Full=Putative anthocyanidin reductase {ECO:0000303|PubMed:16399014}; Short=GbANR {ECO:0000303|PubMed:16399014}; EC=1.3.1.- {ECO:0000250|UniProtKB:Q5FB34};	D5ADN9_PICSI SubName: Full=Uncharacterized protein {ECO:0000313|EMBL:ADE77658.1};	Flavonol reductase/cinnamoyl-CoA reductase	GO:0050662,coenzyme binding; GO:0016491,oxidoreductase activity; GO:0009813,flavonoid biosynthetic process; GO:0003674,molecular_function; GO:0005488,binding; GO:0048037,cofactor binding; GO:0003824,catalytic activity; GO:0008152,metabolic process; GO:0008150,biological_process; GO:0009058,biosynthetic process; GO:0009812,flavonoid metabolic process; GO:0071704,organic substance metabolic process…	NAD dependent epimerase/dehydratase family	--	--	--
	Cluster-27241.80398	4.82	7.27	6.68	88.09	97.14	88.31	132.68	141.01	134.91	195.55	175.65	161.75	3273.35	2685.77	3106.75	3776.5	5078.6	5664.04	3.81556	8.43985e-226	3.76262e-223	up	4.11127	6.08092e-68	1.87546e-64	up	-0.584028	1.59791e-09	2.08628e-08	false	4.38641	6.506e-118	5.46567e-115	up	NA	NA	NA	NA	NA	NA	NA	NA	NA	NA	NA
	Cluster-27241.57532	58.15	61.64	59.49	27.33	26.88	23.45	244.28	269.17	278.12	956	601	572	408	299	335	2763	3911	4756	-1.27408	4.4141e-53	2.85417e-51	down	1.21343	0.13671	0.310064	false	-3.35582	1.06496e-158	1.56368e-155	down	2.08344	9.32243e-80	3.41598e-77	up	807	K08695 anthocyanidin reductase [EC:1.3.1.77] | (RefSeq) anthocyanidin reductase (A)	unknown [Picea sitchensis]	ANR_GINBI RecName: Full=Putative anthocyanidin reductase {ECO:0000303|PubMed:16399014}; Short=GbANR {ECO:0000303|PubMed:16399014}; EC=1.3.1.- {ECO:0000250|UniProtKB:Q5FB34};	A9NVF9_PICSI SubName: Full=Uncharacterized protein {ECO:0000313|EMBL:ABK24620.1};	Flavonol reductase/cinnamoyl-CoA reductase	GO:0050662,coenzyme binding; GO:0016491,oxidoreductase activity; GO:0009813,flavonoid biosynthetic process; GO:0003674,molecular_function; GO:0005488,binding; GO:0048037,cofactor binding; GO:0003824,catalytic activity; GO:0008152,metabolic process; GO:0008150,biological_process; GO:0009058,biosynthetic process; GO:0009812,flavonoid metabolic process; GO:0071704,organic substance metabolic process…	NAD dependent epimerase/dehydratase family	--	--	--
	Cluster-27241.58068	202.09	238.47	238.53	54.7	64.37	73.47	28.83	52.27	37.2	8042.38	5644.34	5661.15	1991.95	1744.18	2533.39	804.01	1845.04	1531.1	-1.88815	1.83852e-29	5.927e-28	down	-2.20153	1.26843e-14	1.4809e-12	down	0.696596	0.0119352	0.0431455	false	-2.58366	4.68771e-25	2.5072e-23	down	1589	K08695 anthocyanidin reductase [EC:1.3.1.77] | (RefSeq) anthocyanidin reductase ((2S)-flavan-3-ol-forming) (A)	unknown [Picea sitchensis]	ANR_GINBI RecName: Full=Putative anthocyanidin reductase {ECO:0000303|PubMed:16399014}; Short=GbANR {ECO:0000303|PubMed:16399014}; EC=1.3.1.- {ECO:0000250|UniProtKB:Q5FB34};	B8LRT5_PICSI SubName: Full=Uncharacterized protein {ECO:0000313|EMBL:ABR18365.1};	Flavonol reductase/cinnamoyl-CoA reductase	GO:0050662,coenzyme binding; GO:0016491,oxidoreductase activity; GO:0009813,flavonoid biosynthetic process; GO:0003674,molecular_function; GO:0005488,binding; GO:0048037,cofactor binding; GO:0003824,catalytic activity; GO:0008152,metabolic process; GO:0008150,biological_process; GO:0009058,biosynthetic process; GO:0009812,flavonoid metabolic process; GO:0071704,organic substance metabolic process…	NAD dependent epimerase/dehydratase family	--	--	--
	Cluster-27241.58429	76.74	72.18	57.79	26.42	28.19	28.8	392.36	339.06	380.04	232	127	90	69	55	77	737	879	1233	-1.36047	1.12158e-09	9.19021e-09	down	1.47831	0.103476	0.25775	false	-3.7263	2.364e-95	1.19007e-92	down	2.3688	2.77512e-32	2.20405e-30	up	348	K08695 anthocyanidin reductase [EC:1.3.1.77] | (RefSeq) anthocyanidin reductase ((2S)-flavan-3-ol-forming) isoform X1 (A)	unknown [Picea sitchensis]	ANR_GINBI RecName: Full=Putative anthocyanidin reductase {ECO:0000303|PubMed:16399014}; Short=GbANR {ECO:0000303|PubMed:16399014}; EC=1.3.1.- {ECO:0000250|UniProtKB:Q5FB34};	B8LRT5_PICSI SubName: Full=Uncharacterized protein {ECO:0000313|EMBL:ABR18365.1};	Flavonol reductase/cinnamoyl-CoA reductase	GO:0050662,coenzyme binding; GO:0016491,oxidoreductase activity; GO:0009813,flavonoid biosynthetic process; GO:0003674,molecular_function; GO:0005488,binding; GO:0048037,cofactor binding; GO:0003824,catalytic activity; GO:0008152,metabolic process; GO:0008150,biological_process; GO:0009058,biosynthetic process; GO:0009812,flavonoid metabolic process; GO:0071704,organic substance metabolic process…	--	--	--	--
	Cluster-27241.70591	9.82	9.73	7.65	2.99	1.89	2.36	0.89	0.59	0.84	265.89	156.5	122.7	73.81	34.69	55.39	16.72	14.09	23.51	-1.97028	2.64995e-20	5.30334e-19	down	-2.58488	5.08638e-07	1.33131e-05	down	1.6341	8.92224e-05	0.000558654	up	-3.60949	5.62117e-30	3.97568e-28	down	NA	NA	NA	NA	NA	NA	NA	NA	NA	NA	NA
	Cluster-27241.93352	0.53	0	0.39	1.14	1.8	1.51	60.51	55.23	62.87	5.78	0	2.46	11.3	13.3	14.44	449.78	534.15	721.26	NA	NA	NA	NA	6.62547	2.14131e-06	4.82056e-05	up	-5.38832	2.34994e-77	8.62597e-75	down	7.42502	6.55666e-42	7.35627e-40	up	NA	NA	NA	NA	NA	NA	NA	NA	NA	NA	NA
	Cluster-27241.102444	1.31	1.84	1.34	1.33	1.74	1.26	19.92	21.48	25.2	12	10	7.01	11	10.72	10.12	122.86	173.6	242.7	NA	NA	NA	NA	2.92976	0.0049408	0.0308414	up	-3.95939	7.11126e-27	4.49093e-25	down	3.86291	9.14296e-24	4.49244e-22	up	564	K08695 anthocyanidin reductase [EC:1.3.1.77] | (RefSeq) hypothetical protein (A)	unknown [Picea sitchensis]	ANR_GINBI RecName: Full=Putative anthocyanidin reductase {ECO:0000303|PubMed:16399014}; Short=GbANR {ECO:0000303|PubMed:16399014}; EC=1.3.1.- {ECO:0000250|UniProtKB:Q5FB34};	B8LRT5_PICSI SubName: Full=Uncharacterized protein {ECO:0000313|EMBL:ABR18365.1};	Flavonol reductase/cinnamoyl-CoA reductase	GO:0050662,coenzyme binding; GO:0016491,oxidoreductase activity; GO:0009813,flavonoid biosynthetic process; GO:0003674,molecular_function; GO:0005488,binding; GO:0048037,cofactor binding; GO:0003824,catalytic activity; GO:0008152,metabolic process; GO:0008150,biological_process; GO:0009058,biosynthetic process; GO:0009812,flavonoid metabolic process; GO:0071704,organic substance metabolic process…	NAD dependent epimerase/dehydratase family	--	--	--
	Cluster-27241.117450	0	0	0.17	0.53	0.34	0.66	12.23	10.45	8.7	0	0	1	4.98	2.4	6	86.77	96.65	95.58	NA	NA	NA	NA	6.73898	9.95758e-05	0.00133719	up	-4.3765	1.29624e-16	3.74412e-15	down	7.68109	5.18264e-10	7.39175e-09	up	NA	NA	NA	NA	NA	NA	NA	NA	NA	NA	NA
	Cluster-27241.44824	17.17	18.13	16.04	20.67	18.35	16.61	32.66	38.38	44.67	613	385	341	675	446	514	816	1215	1650	0.0445139	0.638352	0.751647	false	0.667017	0.0539389	0.166482	false	-1.06437	1.08187e-09	1.44519e-08	down	1.10922	2.17081e-11	3.66886e-10	up	1452	K08695 anthocyanidin reductase [EC:1.3.1.77] | (RefSeq) anthocyanidin reductase ((2S)-flavan-3-ol-forming) (A)	unknown [Picea sitchensis]	ANR_GINBI RecName: Full=Putative anthocyanidin reductase {ECO:0000303|PubMed:16399014}; Short=GbANR {ECO:0000303|PubMed:16399014}; EC=1.3.1.- {ECO:0000250|UniProtKB:Q5FB34};	B8LRT5_PICSI SubName: Full=Uncharacterized protein {ECO:0000313|EMBL:ABR18365.1};	Flavonol reductase/cinnamoyl-CoA reductase	GO:0050662,coenzyme binding; GO:0016491,oxidoreductase activity; GO:0009813,flavonoid biosynthetic process; GO:0003674,molecular_function; GO:0005488,binding; GO:0048037,cofactor binding; GO:0003824,catalytic activity; GO:0008152,metabolic process; GO:0008150,biological_process; GO:0009058,biosynthetic process; GO:0009812,flavonoid metabolic process; GO:0071704,organic substance metabolic process…	NAD dependent epimerase/dehydratase family	--	--	--
	Cluster-27241.70586	0.96	0.99	0.82	2.06	2.06	1.63	1.86	2.72	3.19	16.66	10.21	8.37	32.49	24.24	24.58	22.31	41.76	57.53	0.986195	0.0332839	0.0732908	false	1.23588	0.00236466	0.0175261	up	-0.465281	0.268036	0.478827	false	1.45201	0.00426827	0.0170217	up	NA	NA	NA	NA	NA	NA	NA	NA	NA	NA	NA
	Cluster-27241.42197	1.74	2.42	2	1.71	1.43	1.22	0.83	0.7	0.32	36.89	30.35	24.97	33.01	20.45	22.42	12.12	13.05	7.05	-0.569726	0.123365	0.21687	false	-1.08286	0.0389945	0.133901	false	NA	NA	NA	NA	-1.82976	0.00119575	0.00563579	down	965	K08695 anthocyanidin reductase [EC:1.3.1.77] | (RefSeq) anthocyanidin reductase ((2S)-flavan-3-ol-forming) (A)	unknown [Picea sitchensis]	ANR_GINBI RecName: Full=Putative anthocyanidin reductase {ECO:0000303|PubMed:16399014}; Short=GbANR {ECO:0000303|PubMed:16399014}; EC=1.3.1.- {ECO:0000250|UniProtKB:Q5FB34};	D5ADN9_PICSI SubName: Full=Uncharacterized protein {ECO:0000313|EMBL:ADE77658.1};	Flavonol reductase/cinnamoyl-CoA reductase	GO:0050662,coenzyme binding; GO:0016491,oxidoreductase activity; GO:0009813,flavonoid biosynthetic process; GO:0003674,molecular_function; GO:0005488,binding; GO:0048037,cofactor binding; GO:0003824,catalytic activity; GO:0008152,metabolic process; GO:0008150,biological_process; GO:0009058,biosynthetic process; GO:0009812,flavonoid metabolic process; GO:0071704,organic substance metabolic process…	3-beta hydroxysteroid dehydrogenase/isomerase family	--	--	--
anthocyanidin synthase	Cluster-27241.75907	0.1	0.36	0	3.07	2.14	3.74	0.07	0.27	0.09	4.59	9.3	0	123.55	64.08	142.14	2.1	10.36	4.16	4.26957	5.85578e-15	7.95531e-14	up	3.2813	0.0172147	0.0760916	false	4.42673	2.57883e-13	5.43188e-12	up	NA	NA	NA	NA	NA	NA	NA	NA	NA	NA	NA	NA	NA	NA	NA
	Cluster-27241.57665	187.26	162.28	166.21	14.41	13.57	18.58	61.73	72.67	88.18	159.47	78.99	61	9.93	6.98	14.36	29	50.53	83.69	-3.4651	7.66213e-21	1.59074e-19	down	-1.91913	0.00625783	0.0367448	down	-2.27094	1.85472e-05	0.000131347	down	-1.18688	0.00153253	0.00701201	down	250	K05277 anthocyanidin synthase [EC:1.14.20.4] | (RefSeq) leucoanthocyanidin dioxygenase (A)	unknown [Picea sitchensis]	LDOX_PERFR RecName: Full=Leucoanthocyanidin dioxygenase; Short=LDOX; Short=Leucocyanidin oxygenase; EC=1.14.11.19 {ECO:0000269|PubMed:10074715}; AltName: Full=Leucoanthocyanidin hydroxylase;	A9NVW2_PICSI SubName: Full=Uncharacterized protein {ECO:0000313|EMBL:ABK24773.1};	Iron/ascorbate family oxidoreductases	GO:0031418,L-ascorbic acid binding; GO:0050589,leucocyanidin oxygenase activity; GO:0046872,metal ion binding; GO:0009718,anthocyanin-containing compound biosynthetic process; GO:0003674,molecular_function; GO:0030246,carbohydrate binding; GO:0005488,binding; GO:0019842,vitamin binding; GO:0031406,carboxylic acid binding; GO:0036094,small molecule binding; GO:0043167,ion binding; GO:0043168,anion…	--	--	--	--
	Cluster-27241.58773	169.35	159.19	162.45	12.64	14.54	16.14	34.03	46.78	48.12	3436.56	1917.61	1940.39	233.61	200.05	284.34	477.91	839.97	1013.85	-3.57285	0	0	down	-2.57547	3.49449e-08	1.21096e-06	down	-1.57764	7.78605e-12	1.37945e-10	down	-1.98763	1.45728e-30	1.05895e-28	down	936	K05277 anthocyanidin synthase [EC:1.14.20.4] | (RefSeq) leucoanthocyanidin dioxygenase (A)	GA2ox10 [Pinus tabuliformis]	LDOX_MALDO RecName: Full=Leucoanthocyanidin dioxygenase; Short=LDOX; Short=Leucocyanidin oxygenase; EC=1.14.11.19 {ECO:0000250|UniProtKB:Q96323}; AltName: Full=Anthocyanidin synthase; AltName: Full=Leucoanthocyanidin hydroxylase;	X5CY97_PINTB SubName: Full=GA2ox10 {ECO:0000313|EMBL:AHW42460.1};	Iron/ascorbate family oxidoreductases	GO:0031418,L-ascorbic acid binding; GO:0050589,leucocyanidin oxygenase activity; GO:0046872,metal ion binding; GO:0009718,anthocyanin-containing compound biosynthetic process; GO:0003674,molecular_function; GO:0030246,carbohydrate binding; GO:0005488,binding; GO:0019842,vitamin binding; GO:0031406,carboxylic acid binding; GO:0036094,small molecule binding; GO:0043167,ion binding; GO:0043168,anion…	2OG-Fe(II) oxygenase superfamily	--	--	--
	Cluster-27241.59850	559.18	483.42	607.79	143.09	132.97	113.68	263.15	340.5	315.83	1575.86	792.02	875	347.28	241.02	283.65	458	821.01	957	-2.11926	7.01543e-129	1.39822e-126	down	-1.36451	0.000507995	0.0051665	down	-1.24873	1.15101e-09	1.53173e-08	down	-0.866611	4.27301e-06	3.35108e-05	false	340	K05277 anthocyanidin synthase [EC:1.14.20.4] | (RefSeq) leucoanthocyanidin dioxygenase (A)	GA2ox10 [Pinus tabuliformis]	LDOX_PETHY RecName: Full=Leucoanthocyanidin dioxygenase; Short=LDOX; Short=Leucocyanidin oxygenase; EC=1.14.11.19 {ECO:0000250|UniProtKB:Q96323}; AltName: Full=Leucoanthocyanidin hydroxylase;	X5CY97_PINTB SubName: Full=GA2ox10 {ECO:0000313|EMBL:AHW42460.1};	Iron/ascorbate family oxidoreductases	GO:0031418,L-ascorbic acid binding; GO:0050589,leucocyanidin oxygenase activity; GO:0046872,metal ion binding; GO:0009718,anthocyanin-containing compound biosynthetic process; GO:0003674,molecular_function; GO:0030246,carbohydrate binding; GO:0005488,binding; GO:0019842,vitamin binding; GO:0031406,carboxylic acid binding; GO:0036094,small molecule binding; GO:0043167,ion binding; GO:0043168,anion…	--	--	--	--
	Cluster-27241.63433	267.56	268.73	262.86	105.95	102.76	98.55	223.59	222.18	231.03	11670.8	6972.89	6845.91	4230.69	3053.22	3724.11	6842.65	8597.85	10417.3	-1.45141	0	0	down	-0.772206	0.0239297	0.0960873	false	-1.1444	2.82181e-83	1.14296e-80	down	-0.304189	5.32888e-08	5.72871e-07	false	1717	K05277 anthocyanidin synthase [EC:1.14.20.4] | (RefSeq) leucoanthocyanidin dioxygenase (A)	GA2ox10 [Pinus tabuliformis]	LDOX_PETHY RecName: Full=Leucoanthocyanidin dioxygenase; Short=LDOX; Short=Leucocyanidin oxygenase; EC=1.14.11.19 {ECO:0000250|UniProtKB:Q96323}; AltName: Full=Leucoanthocyanidin hydroxylase;	X5CY97_PINTB SubName: Full=GA2ox10 {ECO:0000313|EMBL:AHW42460.1};	Iron/ascorbate family oxidoreductases	GO:0031418,L-ascorbic acid binding; GO:0050589,leucocyanidin oxygenase activity; GO:0046872,metal ion binding; GO:0009718,anthocyanin-containing compound biosynthetic process; GO:0003674,molecular_function; GO:0030246,carbohydrate binding; GO:0005488,binding; GO:0019842,vitamin binding; GO:0031406,carboxylic acid binding; GO:0036094,small molecule binding; GO:0043167,ion binding; GO:0043168,anion…	2OG-Fe(II) oxygenase superfamily	--	--	--
	Cluster-27241.63534	94.35	87.78	101.33	20.5	18.89	16.51	117.25	198.47	210.36	4529.68	2507.48	2908.09	901.51	618.02	686.65	3953.64	8454.92	10436.7	-2.41606	3.48718e-221	1.45867e-218	down	-0.0289269	0.974946	0.987882	false	-3.24353	1.61729e-36	1.55715e-34	down	0.826876	0.000745359	0.00371697	false	1864	K05277 anthocyanidin synthase [EC:1.14.20.4] | (RefSeq) leucoanthocyanidin dioxygenase (A)	GA2ox10 [Pinus tabuliformis]	LDOX_PETHY RecName: Full=Leucoanthocyanidin dioxygenase; Short=LDOX; Short=Leucocyanidin oxygenase; EC=1.14.11.19 {ECO:0000250|UniProtKB:Q96323}; AltName: Full=Leucoanthocyanidin hydroxylase;	X5CY97_PINTB SubName: Full=GA2ox10 {ECO:0000313|EMBL:AHW42460.1};	Iron/ascorbate family oxidoreductases	GO:0031418,L-ascorbic acid binding; GO:0050589,leucocyanidin oxygenase activity; GO:0046872,metal ion binding; GO:0009718,anthocyanin-containing compound biosynthetic process; GO:0003674,molecular_function; GO:0030246,carbohydrate binding; GO:0005488,binding; GO:0019842,vitamin binding; GO:0031406,carboxylic acid binding; GO:0036094,small molecule binding; GO:0043167,ion binding; GO:0043168,anion…	2OG-Fe(II) oxygenase superfamily	--	--	--
	Cluster-27241.64624	89.02	93.6	97.14	21.21	21.81	20.8	54.53	63.15	58.01	4760.08	2978.63	3108.78	1039.29	795.25	963.16	2050.23	2997.07	3204.59	-2.20578	0	0	down	-1.29595	0.0023794	0.0176159	down	-1.46788	4.34908e-38	4.52086e-36	down	-0.735721	7.79209e-11	1.23228e-09	false	2047	K05277 anthocyanidin synthase [EC:1.14.20.4] | (RefSeq) leucoanthocyanidin dioxygenase (A)	GA2ox10 [Pinus tabuliformis]	LDOX_PETHY RecName: Full=Leucoanthocyanidin dioxygenase; Short=LDOX; Short=Leucocyanidin oxygenase; EC=1.14.11.19 {ECO:0000250|UniProtKB:Q96323}; AltName: Full=Leucoanthocyanidin hydroxylase;	X5CY97_PINTB SubName: Full=GA2ox10 {ECO:0000313|EMBL:AHW42460.1};	Iron/ascorbate family oxidoreductases	GO:0031418,L-ascorbic acid binding; GO:0050589,leucocyanidin oxygenase activity; GO:0046872,metal ion binding; GO:0009718,anthocyanin-containing compound biosynthetic process; GO:0003674,molecular_function; GO:0030246,carbohydrate binding; GO:0005488,binding; GO:0019842,vitamin binding; GO:0031406,carboxylic acid binding; GO:0036094,small molecule binding; GO:0043167,ion binding; GO:0043168,anion…	2OG-Fe(II) oxygenase superfamily	--	--	--
	Cluster-27241.75715	69	68.42	51.07	4.49	0	5.82	0	2.69	0	3009.88	1775.24	1330.2	179.3	0	219.92	0	104.14	0	-4.25953	0.0126381	0.031858	down	-4.92735	0.0253076	0.0998226	false	1.909	0.608645	0.782261	false	-6.17346	0.0162557	0.052441	false	NA	NA	NA	NA	NA	NA	NA	NA	NA	NA	NA
	Cluster-27241.75783	99.85	102.06	101.74	41.55	36.46	37.03	46.26	59.92	65.5	4412.06	2682.83	2684.63	1680.84	1097.38	1417.69	1434.47	2349.15	2991.75	-1.4699	4.24018e-193	1.49652e-190	down	-1.1562	1.31008e-07	3.97427e-06	down	-0.584846	0.000788409	0.00405233	false	-0.887284	3.20736e-08	3.595e-07	false	NA	NA	NA	NA	NA	NA	NA	NA	NA	NA	NA
	Cluster-27241.76052	397.56	373.88	407.93	14.3	11.26	18.03	16.63	37.3	63.59	674.92	366.16	330.71	20.38	11.99	27.38	16.64	53.19	117.77	-4.7606	1.17621e-101	1.64001e-99	down	-3.83867	4.10399e-11	2.44587e-09	down	-1.49112	0.0293773	0.09133	false	-3.27503	3.13445e-11	5.19302e-10	down	NA	NA	NA	NA	NA	NA	NA	NA	NA	NA	NA
	Cluster-27241.80672	40.71	40.65	41.61	8.53	9.46	7	60.66	78.45	81.69	297.08	174.84	170.29	55.62	46.01	44.62	293.36	501.81	627.23	-2.36004	2.04312e-39	9.53511e-38	down	-0.0513392	0.949815	0.976083	false	-3.15218	4.9104e-34	4.27253e-32	down	0.798274	8.95195e-05	0.000547772	false	NA	NA	NA	NA	NA	NA	NA	NA	NA	NA	NA
bifunctional dihydroflavonol 4-reductase/flavanone 4-reductase	Cluster-27241.70345	2.64	1.98	1.4	8.07	6.28	5.46	3.27	1.26	1.09	45	20	14	124.96	72.36	80.87	38.36	19.03	19.26	1.61183	3.28703e-07	1.93622e-06	up	0.98538	0.149291	0.32852	false	1.85577	0.000276841	0.0015712	up	-0.204009	0.749599	0.854403	false	NA	NA	NA	NA	NA	NA	NA	NA	NA	NA	NA
	Cluster-27241.77670	0.83	0.95	0.16	1.41	2.13	1.6	0.46	0.73	0.46	31.1	21.3	3.65	48.4	54.44	52	12.22	24.21	17.91	1.30499	0.00942148	0.0246978	up	0.71316	0.310022	0.519236	false	1.62422	0.000239824	0.00137753	up	-0.309043	0.681757	0.807789	false	NA	NA	NA	NA	NA	NA	NA	NA	NA	NA	NA
	Cluster-27241.78806	0	0	0	25.53	21.58	24.12	9.35	20.62	16.94	0	0	0	150.04	94.64	139.13	40.64	118.97	117.74	9.14697	2.4376e-14	3.15473e-13	up	8.87608	8.34846e-13	7.28718e-11	up	0.581609	0.124618	0.281776	false	8.56043	7.72519e-11	1.22282e-09	up	NA	NA	NA	NA	NA	NA	NA	NA	NA	NA	NA
	Cluster-27241.95192	14.1	25.3	21.52	5.63	11.12	9.35	31.26	109.3	68.89	60	63	49	21	31	35	85	403	312	-1.25814	0.00092134	0.00310461	down	0.931238	0.293121	0.501661	false	-3.02526	1.15526e-07	1.13653e-06	down	1.76576	0.000929915	0.00450838	up	NA	NA	NA	NA	NA	NA	NA	NA	NA	NA	NA
	Cluster-27241.68760	39.29	42.01	41.68	21.84	20.58	14.69	62.17	96.95	97.6	2358.07	1500.44	1498.76	1201.5	842.17	763.66	2626.28	5165.41	6049.34	-1.18381	2.68772e-25	7.01581e-24	down	0.281638	0.639469	0.791706	false	-2.17971	3.87222e-18	1.27765e-16	down	0.996269	2.03852e-06	1.68139e-05	false	NA	NA	NA	NA	NA	NA	NA	NA	NA	NA	NA
	Cluster-27241.95865	0.4	0.16	0.18	1.19	1.04	0.83	15.27	17.42	18.7	9.75	2.36	2.64	26.53	17.24	17.55	258.91	376.13	472.84	NA	NA	NA	NA	5.0847	4.03724e-06	8.48003e-05	up	-4.06111	7.62127e-50	1.27888e-47	down	5.89798	6.98279e-40	7.44629e-38	up	NA	NA	NA	NA	NA	NA	NA	NA	NA	NA	NA
	Cluster-27241.102445	0.29	0	0	1.34	1.79	0	7.86	10.8	18.2	1	0	0	4	4	0	17	32	67	NA	NA	NA	NA	5.41775	0.00335492	0.0229088	up	-3.66447	0.000120332	0.000733503	down	6.30489	6.03955e-06	4.60235e-05	up	364	K13082 bifunctional dihydroflavonol 4-reductase/flavanone 4-reductase [EC:1.1.1.219 1.1.1.234] | (RefSeq) dihydroflavonol 4-reductase (A)	unknown [Picea sitchensis]	ANR_GINBI RecName: Full=Putative anthocyanidin reductase {ECO:0000303|PubMed:16399014}; Short=GbANR {ECO:0000303|PubMed:16399014}; EC=1.3.1.- {ECO:0000250|UniProtKB:Q5FB34};	D5ADN9_PICSI SubName: Full=Uncharacterized protein {ECO:0000313|EMBL:ADE77658.1};	Flavonol reductase/cinnamoyl-CoA reductase	GO:0050662,coenzyme binding; GO:0016491,oxidoreductase activity; GO:0009813,flavonoid biosynthetic process; GO:0003674,molecular_function; GO:0005488,binding; GO:0048037,cofactor binding; GO:0003824,catalytic activity; GO:0008152,metabolic process; GO:0008150,biological_process; GO:0009058,biosynthetic process; GO:0009812,flavonoid metabolic process; GO:0071704,organic substance metabolic process…	GDP-mannose 4,6 dehydratase	--	--	--
	Cluster-27241.106136	0	0	0	0.27	0	0.12	13.69	17.33	19	0	0	0	7.44	0	3.08	287.26	461.65	591.28	NA	NA	NA	NA	9.85684	0.000135006	0.00172892	up	-6.97534	6.8585e-38	7.02577e-36	down	10.8486	2.44401e-19	8.77805e-18	up	NA	NA	NA	NA	NA	NA	NA	NA	NA	NA	NA
	Cluster-27241.41490	0.1	0	0	0	0	0	4.17	2.26	1.53	1.42	0	0	0	0	0	39.7	27.74	22.27	NA	NA	NA	NA	5.1143	0.0482934	0.154423	false	-7.33628	3.28888e-07	3.01031e-06	down	6.11069	1.49704e-05	0.000106208	up	723	K13082 bifunctional dihydroflavonol 4-reductase/flavanone 4-reductase [EC:1.1.1.219 1.1.1.234] | (RefSeq) dihydroflavonol 4-reductase (A)	hypothetical protein POPTR_0001s10460g [Populus trichocarpa]	ANR_GINBI RecName: Full=Putative anthocyanidin reductase {ECO:0000303|PubMed:16399014}; Short=GbANR {ECO:0000303|PubMed:16399014}; EC=1.3.1.- {ECO:0000250|UniProtKB:Q5FB34};	B9GL76_POPTR SubName: Full=Uncharacterized protein {ECO:0000313|EMBL:EEE84287.2};	Flavonol reductase/cinnamoyl-CoA reductase	GO:0050662,coenzyme binding; GO:0016491,oxidoreductase activity; GO:0009813,flavonoid biosynthetic process; GO:0003674,molecular_function; GO:0005488,binding; GO:0048037,cofactor binding; GO:0003824,catalytic activity; GO:0008152,metabolic process; GO:0008150,biological_process; GO:0009058,biosynthetic process; GO:0009812,flavonoid metabolic process; GO:0071704,organic substance metabolic process…	--	--	--	--
	Cluster-27241.51051	1.4	0.72	0.4	0.36	0.44	0.66	5.97	3.01	3.65	17.37	5.3	2.86	4	3.72	7.12	50.53	33.08	47.34	NA	NA	NA	NA	1.42628	0.155406	0.337138	false	-3.07563	9.27339e-07	7.9918e-06	down	2.23149	0.000706571	0.00354201	up	673	K13082 bifunctional dihydroflavonol 4-reductase/flavanone 4-reductase [EC:1.1.1.219 1.1.1.234] | (RefSeq) LOW QUALITY PROTEIN: dihydroflavonol 4-reductase (A)	unknown [Picea sitchensis]	ANR_GINBI RecName: Full=Putative anthocyanidin reductase {ECO:0000303|PubMed:16399014}; Short=GbANR {ECO:0000303|PubMed:16399014}; EC=1.3.1.- {ECO:0000250|UniProtKB:Q5FB34};	B8LRT5_PICSI SubName: Full=Uncharacterized protein {ECO:0000313|EMBL:ABR18365.1};	Flavonol reductase/cinnamoyl-CoA reductase	GO:0050662,coenzyme binding; GO:0016491,oxidoreductase activity; GO:0009813,flavonoid biosynthetic process; GO:0003674,molecular_function; GO:0005488,binding; GO:0048037,cofactor binding; GO:0003824,catalytic activity; GO:0008152,metabolic process; GO:0008150,biological_process; GO:0009058,biosynthetic process; GO:0009812,flavonoid metabolic process; GO:0071704,organic substance metabolic process…	NAD dependent epimerase/dehydratase family	--	--	--
	Cluster-27241.53214	1.35	1.03	0.68	0.89	1.03	0.84	3.53	4.43	5.26	40.61	18.32	12.07	24.46	21.02	22.01	74.07	117.94	163.68	-0.247645	0.575859	0.699128	false	1.3223	0.0697632	0.198199	false	-2.28543	2.79877e-11	4.59794e-10	down	2.03471	2.65653e-07	2.52696e-06	up	1263	K13082 bifunctional dihydroflavonol 4-reductase/flavanone 4-reductase [EC:1.1.1.219 1.1.1.234] | (RefSeq) dihydroflavonol 4-reductase (A)	unknown [Picea sitchensis]	ANR_GINBI RecName: Full=Putative anthocyanidin reductase {ECO:0000303|PubMed:16399014}; Short=GbANR {ECO:0000303|PubMed:16399014}; EC=1.3.1.- {ECO:0000250|UniProtKB:Q5FB34};	A9P186_PICSI SubName: Full=Uncharacterized protein {ECO:0000313|EMBL:ABK26647.1};	Flavonol reductase/cinnamoyl-CoA reductase	GO:0050662,coenzyme binding; GO:0016491,oxidoreductase activity; GO:0009813,flavonoid biosynthetic process; GO:0003674,molecular_function; GO:0005488,binding; GO:0048037,cofactor binding; GO:0003824,catalytic activity; GO:0008152,metabolic process; GO:0008150,biological_process; GO:0009058,biosynthetic process; GO:0009812,flavonoid metabolic process; GO:0071704,organic substance metabolic process…	NAD dependent epimerase/dehydratase family	--	--	--
	Cluster-27241.53216	0	0.3	0.15	0.4	0.4	0	2.56	3.2	3.54	0	1.99	0.98	4	3	0	19.37	31.41	41.26	NA	NA	NA	NA	3.46613	0.0263807	0.102828	false	-3.57963	3.20404e-05	0.000217758	down	4.48223	2.25782e-05	0.000155817	up	630	K13082 bifunctional dihydroflavonol 4-reductase/flavanone 4-reductase [EC:1.1.1.219 1.1.1.234] | (RefSeq) dihydroflavonol 4-reductase (A)	unknown [Picea sitchensis]	ANR_GINBI RecName: Full=Putative anthocyanidin reductase {ECO:0000303|PubMed:16399014}; Short=GbANR {ECO:0000303|PubMed:16399014}; EC=1.3.1.- {ECO:0000250|UniProtKB:Q5FB34};	A9P186_PICSI SubName: Full=Uncharacterized protein {ECO:0000313|EMBL:ABK26647.1};	Flavonol reductase/cinnamoyl-CoA reductase	GO:0050662,coenzyme binding; GO:0016491,oxidoreductase activity; GO:0009813,flavonoid biosynthetic process; GO:0003674,molecular_function; GO:0005488,binding; GO:0048037,cofactor binding; GO:0003824,catalytic activity; GO:0008152,metabolic process; GO:0008150,biological_process; GO:0009058,biosynthetic process; GO:0009812,flavonoid metabolic process; GO:0071704,organic substance metabolic process…	--	--	--	--
	Cluster-27241.56851	4.17	3.37	4.68	5.02	3.55	5.29	33.33	31.35	33.67	45.8	21.9	29.54	49.7	26.19	50.56	247.8	303.21	386.31	0.122806	0.713934	0.810803	false	2.12551	0.00721857	0.040944	up	-2.80639	3.68684e-33	3.086e-31	down	2.93658	1.10117e-36	1.0363e-34	up	624	K13082 bifunctional dihydroflavonol 4-reductase/flavanone 4-reductase [EC:1.1.1.219 1.1.1.234] | (RefSeq) dihydroflavonol-4-reductase-like (A)	unknown [Picea sitchensis]	ANR_GINBI RecName: Full=Putative anthocyanidin reductase {ECO:0000303|PubMed:16399014}; Short=GbANR {ECO:0000303|PubMed:16399014}; EC=1.3.1.- {ECO:0000250|UniProtKB:Q5FB34};	B8LRT5_PICSI SubName: Full=Uncharacterized protein {ECO:0000313|EMBL:ABR18365.1};	Flavonol reductase/cinnamoyl-CoA reductase	GO:0050662,coenzyme binding; GO:0016491,oxidoreductase activity; GO:0009813,flavonoid biosynthetic process; GO:0003674,molecular_function; GO:0005488,binding; GO:0048037,cofactor binding; GO:0003824,catalytic activity; GO:0008152,metabolic process; GO:0008150,biological_process; GO:0009058,biosynthetic process; GO:0009812,flavonoid metabolic process; GO:0071704,organic substance metabolic process…	--	--	--	--
	Cluster-27241.56852	2.95	3.5	3.38	4.89	3.27	4.91	21.56	26.16	32.74	49.76	34.97	33.33	74.83	37.29	71.95	250.26	389.81	573.88	0.364699	0.215705	0.336519	false	2.19033	0.00345194	0.0234512	up	-2.62141	4.21e-19	1.5216e-17	down	2.98699	9.40498e-27	5.63383e-25	up	821	K13082 bifunctional dihydroflavonol 4-reductase/flavanone 4-reductase [EC:1.1.1.219 1.1.1.234] | (RefSeq) bifunctional dihydroflavonol 4-reductase/flavanone 4-reductase (A)	unknown [Picea sitchensis]	ANR_GINBI RecName: Full=Putative anthocyanidin reductase {ECO:0000303|PubMed:16399014}; Short=GbANR {ECO:0000303|PubMed:16399014}; EC=1.3.1.- {ECO:0000250|UniProtKB:Q5FB34};	A9P186_PICSI SubName: Full=Uncharacterized protein {ECO:0000313|EMBL:ABK26647.1};	Flavonol reductase/cinnamoyl-CoA reductase	GO:0050662,coenzyme binding; GO:0016491,oxidoreductase activity; GO:0009813,flavonoid biosynthetic process; GO:0003674,molecular_function; GO:0005488,binding; GO:0048037,cofactor binding; GO:0003824,catalytic activity; GO:0008152,metabolic process; GO:0008150,biological_process; GO:0009058,biosynthetic process; GO:0009812,flavonoid metabolic process; GO:0071704,organic substance metabolic process…	NAD dependent epimerase/dehydratase family	--	--	--
	Cluster-27241.57437	1.02	1.61	1.04	1.4	1.16	1.76	5.34	3.12	3.36	29.28	27.32	17.73	36.67	22.65	43.71	106.65	79.16	99.66	0.208491	0.590859	0.711981	false	1.07822	0.0497268	0.157419	false	-1.42414	0.000190069	0.00111426	down	1.63608	8.45346e-05	0.000519856	up	1215	K13082 bifunctional dihydroflavonol 4-reductase/flavanone 4-reductase [EC:1.1.1.219 1.1.1.234] | (RefSeq) dihydroflavonol 4-reductase (A)	unknown [Picea sitchensis]	ANR_GINBI RecName: Full=Putative anthocyanidin reductase {ECO:0000303|PubMed:16399014}; Short=GbANR {ECO:0000303|PubMed:16399014}; EC=1.3.1.- {ECO:0000250|UniProtKB:Q5FB34};	A9P186_PICSI SubName: Full=Uncharacterized protein {ECO:0000313|EMBL:ABK26647.1};	Flavonol reductase/cinnamoyl-CoA reductase	GO:0050662,coenzyme binding; GO:0016491,oxidoreductase activity; GO:0009813,flavonoid biosynthetic process; GO:0003674,molecular_function; GO:0005488,binding; GO:0048037,cofactor binding; GO:0003824,catalytic activity; GO:0008152,metabolic process; GO:0008150,biological_process; GO:0009058,biosynthetic process; GO:0009812,flavonoid metabolic process; GO:0071704,organic substance metabolic process…	NAD dependent epimerase/dehydratase family	--	--	--
	Cluster-27241.57438	98.32	99.64	99.87	90.96	90.24	77.62	269.67	234.35	223.28	962.04	576.26	558.56	801.18	592.77	661.94	1777.01	2017.94	2287.48	-0.265823	0.00019258	0.000739965	false	0.661004	0.130092	0.300094	false	-1.48901	1.89252e-42	2.39034e-40	down	1.22744	3.14415e-30	2.2609e-28	up	584	K13082 bifunctional dihydroflavonol 4-reductase/flavanone 4-reductase [EC:1.1.1.219 1.1.1.234] | (RefSeq) dihydroflavonol 4-reductase (A)	unknown [Picea sitchensis]	ANR_GINBI RecName: Full=Putative anthocyanidin reductase {ECO:0000303|PubMed:16399014}; Short=GbANR {ECO:0000303|PubMed:16399014}; EC=1.3.1.- {ECO:0000250|UniProtKB:Q5FB34};	A9P186_PICSI SubName: Full=Uncharacterized protein {ECO:0000313|EMBL:ABK26647.1};	Flavonol reductase/cinnamoyl-CoA reductase	GO:0050662,coenzyme binding; GO:0016491,oxidoreductase activity; GO:0009813,flavonoid biosynthetic process; GO:0003674,molecular_function; GO:0005488,binding; GO:0048037,cofactor binding; GO:0003824,catalytic activity; GO:0008152,metabolic process; GO:0008150,biological_process; GO:0009058,biosynthetic process; GO:0009812,flavonoid metabolic process; GO:0071704,organic substance metabolic process…	3-beta hydroxysteroid dehydrogenase/isomerase family	--	--	--
	Cluster-27241.57840	6.37	2.7	7.08	0	1.96	0	28.81	29.71	31.14	145.93	36.82	95.78	0	30.52	0	458.38	602.9	740.45	-3.09372	0.185322	0.299903	false	1.4379	0.463621	0.659718	false	-5.50139	0.016346	0.0563007	false	2.40443	7.9462e-12	1.39785e-10	up	1024	K13082 bifunctional dihydroflavonol 4-reductase/flavanone 4-reductase [EC:1.1.1.219 1.1.1.234] | (RefSeq) dihydroflavonol 4-reductase (A)	unknown [Picea sitchensis]	ANR_GINBI RecName: Full=Putative anthocyanidin reductase {ECO:0000303|PubMed:16399014}; Short=GbANR {ECO:0000303|PubMed:16399014}; EC=1.3.1.- {ECO:0000250|UniProtKB:Q5FB34};	A9P186_PICSI SubName: Full=Uncharacterized protein {ECO:0000313|EMBL:ABK26647.1};	Flavonol reductase/cinnamoyl-CoA reductase	GO:0050662,coenzyme binding; GO:0016491,oxidoreductase activity; GO:0009813,flavonoid biosynthetic process; GO:0003674,molecular_function; GO:0005488,binding; GO:0048037,cofactor binding; GO:0003824,catalytic activity; GO:0008152,metabolic process; GO:0008150,biological_process; GO:0009058,biosynthetic process; GO:0009812,flavonoid metabolic process; GO:0071704,organic substance metabolic process…	NAD dependent epimerase/dehydratase family	--	--	--
	Cluster-27241.68761	84.26	81.08	78.82	77.64	77.06	70.93	196.94	346.16	364.22	4125.98	2362.21	2307.4	3482.36	2571.33	3008.37	6774.5	15041	18428.7	-0.189213	1.4387e-06	7.75963e-06	false	1.1464	0.0426546	0.141952	false	-2.01614	6.46965e-15	1.60101e-13	down	1.82933	2.36169e-13	4.89447e-12	up	NA	NA	NA	NA	NA	NA	NA	NA	NA	NA	NA
	Cluster-27241.41467	10.56	10.52	10.69	9	9.16	7.54	17.85	21.28	21.58	374.37	221.84	225.66	291.84	221.15	231.77	442.96	669.08	791.83	-0.379781	0.000987382	0.00330643	false	0.372714	0.345302	0.554864	false	-1.24984	3.94521e-14	8.96359e-13	down	0.87321	3.67061e-09	4.68781e-08	false	1444	K13082 bifunctional dihydroflavonol 4-reductase/flavanone 4-reductase [EC:1.1.1.219 1.1.1.234] | (RefSeq) dihydroflavonol 4-reductase-like (A)	unknown [Picea sitchensis]	DFRA_MALDO RecName: Full=Bifunctional dihydroflavonol 4-reductase/flavanone 4-reductase; AltName: Full=Dihydroflavonol 4-reductase; Short=DFR; EC=1.1.1.219 {ECO:0000269|PubMed:12667486}; AltName: Full=Dihydrokaempferol 4-reductase; AltName: Full=Flavanone 4-reductase; Short=FNR; EC=1.1.1.234 {ECO:0000269|PubMed:12667486};	C0PQE0_PICSI SubName: Full=Uncharacterized protein {ECO:0000313|EMBL:ACN40030.1};	Flavonol reductase/cinnamoyl-CoA reductase	GO:0050662,coenzyme binding; GO:0045552,dihydrokaempferol 4-reductase activity; GO:0047890,flavanone 4-reductase activity; GO:0009813,flavonoid biosynthetic process; GO:0003674,molecular_function; GO:0005488,binding; GO:0048037,cofactor binding; GO:0003824,catalytic activity; GO:0016491,oxidoreductase activity; GO:0016614,oxidoreductase activity, acting on CH-OH group of donors; GO:0016616,oxidor…	NAD dependent epimerase/dehydratase family	--	--	--
	Cluster-27241.57107	6.62	6.42	4.47	3.87	3.78	2.84	15.47	9.23	10.48	149.33	86.04	59.5	79.51	57.92	55.54	242.27	184.38	245.22	-0.815545	0.000727753	0.00250231	false	0.30763	0.581937	0.751246	false	-1.73673	4.87317e-09	5.95443e-08	down	0.931971	0.00253885	0.0108618	false	1012	K13082 bifunctional dihydroflavonol 4-reductase/flavanone 4-reductase [EC:1.1.1.219 1.1.1.234] | (RefSeq) dihydroflavonol 4-reductase (A)	unknown [Picea sitchensis]	ANR_GINBI RecName: Full=Putative anthocyanidin reductase {ECO:0000303|PubMed:16399014}; Short=GbANR {ECO:0000303|PubMed:16399014}; EC=1.3.1.- {ECO:0000250|UniProtKB:Q5FB34};	A9P186_PICSI SubName: Full=Uncharacterized protein {ECO:0000313|EMBL:ABK26647.1};	Flavonol reductase/cinnamoyl-CoA reductase	GO:0050662,coenzyme binding; GO:0016491,oxidoreductase activity; GO:0009813,flavonoid biosynthetic process; GO:0003674,molecular_function; GO:0005488,binding; GO:0048037,cofactor binding; GO:0003824,catalytic activity; GO:0008152,metabolic process; GO:0008150,biological_process; GO:0009058,biosynthetic process; GO:0009812,flavonoid metabolic process; GO:0071704,organic substance metabolic process…	NAD dependent epimerase/dehydratase family	--	--	--
	Cluster-27241.57108	27.29	25.66	27.05	22.55	20.92	22.1	46.17	49.31	50.71	705.36	394.06	413.95	531.77	367.27	495.52	830.51	1129	1358.51	-0.355053	1.17468e-05	5.52326e-05	false	0.335288	0.352272	0.561265	false	-1.16084	8.64941e-25	4.7924e-23	down	0.808372	1.90692e-14	4.40818e-13	false	1122	K13082 bifunctional dihydroflavonol 4-reductase/flavanone 4-reductase [EC:1.1.1.219 1.1.1.234] | (RefSeq) dihydroflavonol 4-reductase (A)	unknown [Picea sitchensis]	ANR_GINBI RecName: Full=Putative anthocyanidin reductase {ECO:0000303|PubMed:16399014}; Short=GbANR {ECO:0000303|PubMed:16399014}; EC=1.3.1.- {ECO:0000250|UniProtKB:Q5FB34};	A9P186_PICSI SubName: Full=Uncharacterized protein {ECO:0000313|EMBL:ABK26647.1};	Flavonol reductase/cinnamoyl-CoA reductase	GO:0050662,coenzyme binding; GO:0016491,oxidoreductase activity; GO:0009813,flavonoid biosynthetic process; GO:0003674,molecular_function; GO:0005488,binding; GO:0048037,cofactor binding; GO:0003824,catalytic activity; GO:0008152,metabolic process; GO:0008150,biological_process; GO:0009058,biosynthetic process; GO:0009812,flavonoid metabolic process; GO:0071704,organic substance metabolic process…	NAD dependent epimerase/dehydratase family	--	--	--
caffeoyl-CoA O-methyltransferase	Cluster-27241.78866	5.91	5.17	3.79	11.75	11.37	13.61	7.5	10.1	10.79	170.99	88.93	65.09	310.59	223.7	341.79	151.54	259.19	323.65	1.22493	1.42436e-11	1.43717e-10	up	1.05561	5.71435e-06	0.00011475	up	0.364321	0.108214	0.253767	false	0.870363	0.00163018	0.00739495	false	NA	NA	NA	NA	NA	NA	NA	NA	NA	NA	NA
	Cluster-27241.64830	1072.76	1045.23	1147.89	1098.1	1003.65	995.12	309.77	599.65	590.02	25261.9	14618.9	15969.8	23575.2	16042.4	20332	5066.74	12503	14409	-0.146951	0.000900857	0.00304255	false	-0.581751	0.101588	0.254659	false	1.03622	0.000221275	0.00128059	up	-1.18373	1.46183e-05	0.000103946	down	1045	K00588 caffeoyl-CoA O-methyltransferase [EC:2.1.1.104] | (RefSeq) flavonoid 3',5'-methyltransferase-like (A)	BSU2 [Pinus tabuliformis]	CAMT_EUCGU RecName: Full=Caffeoyl-CoA O-methyltransferase; EC=2.1.1.104; AltName: Full=Trans-caffeoyl-CoA 3-O-methyltransferase; Short=CCoAMT; Short=CCoAOMT;	A0A0K0M6X6_PINTB SubName: Full=BSU2 {ECO:0000313|EMBL:AJP06248.1};	O-methyltransferase	GO:0042409,caffeoyl-CoA O-methyltransferase activity; GO:0046872,metal ion binding; GO:0009809,lignin biosynthetic process; GO:0003674,molecular_function; GO:0003824,catalytic activity; GO:0008168,methyltransferase activity; GO:0008171,O-methyltransferase activity; GO:0008757,S-adenosylmethionine-dependent methyltransferase activity; GO:0016740,transferase activity; GO:0016741,transferase activit…	O-methyltransferase	--	--	--
	Cluster-27241.78870	8.52	7.8	9.83	6.11	7.14	6.68	2.78	3.78	3.54	167.1	90.81	113.37	108.94	94.81	113.63	37.63	65.5	72.14	-0.457914	0.0120358	0.0305695	false	-0.869374	0.0125391	0.0606472	false	0.962176	0.000379548	0.00209342	false	-1.41702	9.8493e-08	1.0142e-06	down	NA	NA	NA	NA	NA	NA	NA	NA	NA	NA	NA
	Cluster-27241.78876	22.52	26.42	21.24	13.6	15.18	13.33	8.72	10.31	13.42	230.37	159.85	124.51	125.38	104.38	118.8	60.22	92.91	143.63	-0.804753	1.24149e-06	6.75077e-06	false	-0.978478	6.47027e-06	0.000127307	false	0.357842	0.199976	0.39543	false	-1.16022	2.21608e-05	0.000153029	down	NA	NA	NA	NA	NA	NA	NA	NA	NA	NA	NA
	Cluster-27241.78877	7	5.81	6.63	5.23	4.32	2.76	1.89	2.8	3.2	159.41	78.55	89.17	108.5	66.81	54.54	29.87	56.41	75.54	-0.736452	0.00278901	0.00839752	false	-1.02036	0.00146232	0.0119103	down	0.620549	0.115657	0.266784	false	-1.351	9.91248e-06	7.25819e-05	down	NA	NA	NA	NA	NA	NA	NA	NA	NA	NA	NA
chalcone isomerase	Cluster-27241.82216	35.62	37.04	39	19.44	22.39	16.29	20.44	35.15	38.06	374	230	235	184	158	149	145	325	418	-1.01026	1.14979e-13	1.40033e-12	down	-0.615383	0.0521613	0.162702	false	-0.705044	0.0300504	0.0930123	false	-0.301438	0.304681	0.48228	false	NA	NA	NA	NA	NA	NA	NA	NA	NA	NA	NA
	Cluster-27241.82218	22.2	19.5	19.28	10.58	8.04	8.98	18.4	19.95	22.71	210	109	104	90	51	74	117	166	225	-1.2048	3.70284e-10	3.1948e-09	down	-0.521326	0.186047	0.377936	false	-1.14839	2.34013e-06	1.89659e-05	down	-0.053866	0.797397	0.8859	false	NA	NA	NA	NA	NA	NA	NA	NA	NA	NA	NA
	Cluster-27241.17623	0	0	0	1.43	2.36	2.57	3.66	3.33	4.82	0	0	0	13.03	16	22.69	25	29.68	51	NA	NA	NA	NA	6.80697	1.4415e-07	4.30935e-06	up	-0.895884	0.068699	0.179671	false	7.18778	9.4761e-08	9.78936e-07	up	NA	NA	NA	NA	NA	NA	NA	NA	NA	NA	NA
	Cluster-27241.59504	0.42	0.32	0.15	0.19	0.92	0.98	2.14	0.71	0.86	26.29	11.81	5.48	11.1	39.47	53.64	94.65	39.79	56.19	1.19244	0.0872969	0.164021	false	1.66127	0.0178233	0.0779902	false	-0.816426	0.28388	0.497471	false	2.02001	0.00317994	0.0131773	up	2364	K01859 chalcone isomerase [EC:5.5.1.6] | (RefSeq) chalcone--flavonone isomerase (A)	unknown [Picea sitchensis]	CFI2_VITVI RecName: Full=Chalcone--flavonone isomerase 2; Short=Chalcone isomerase 2; EC=5.5.1.6;	D5ADH5_PICSI SubName: Full=Uncharacterized protein {ECO:0000313|EMBL:ADE77594.1};	--	GO:0045430,chalcone isomerase activity; GO:0009813,flavonoid biosynthetic process; GO:0003674,molecular_function; GO:0003824,catalytic activity; GO:0016853,isomerase activity; GO:0016872,intramolecular lyase activity; GO:0008152,metabolic process; GO:0008150,biological_process; GO:0009058,biosynthetic process; GO:0009812,flavonoid metabolic process; GO:0071704,organic substance metabolic process;…	Chalcone-flavanone isomerase	--	--	--
	Cluster-27241.63034	1.88	1.54	1.53	2.24	2.57	2.13	4.26	4.31	3.26	65.64	31.95	31.69	71.61	61.13	64.54	103.92	133.22	117.64	0.398037	0.124249	0.218	false	0.839877	0.0116359	0.05755	false	-0.767286	0.0032771	0.0142746	false	1.17455	6.27469e-05	0.000395689	up	1425	K01859 chalcone isomerase [EC:5.5.1.6] | (RefSeq) probable chalcone--flavonone isomerase 3 isoform X1 (A)	unknown [Picea sitchensis]	CFI3_ARATH RecName: Full=Probable chalcone--flavonone isomerase 3; Short=Chalcone isomerase 3; EC=5.5.1.6; AltName: Full=Chalcone isomerase-like 1;	A9NRN8_PICSI SubName: Full=Uncharacterized protein {ECO:0000313|EMBL:ABK23299.1};	--	GO:0005783,endoplasmic reticulum; GO:0045430,chalcone isomerase activity; GO:0009813,flavonoid biosynthetic process; GO:0080167,response to karrikin; GO:0003674,molecular_function; GO:0003824,catalytic activity; GO:0016853,isomerase activity; GO:0016872,intramolecular lyase activity; GO:0008152,metabolic process; GO:0008150,biological_process; GO:0009058,biosynthetic process; GO:0009812,flavonoid…	Chalcone-flavanone isomerase	--	--	--
	Cluster-27241.63039	243.16	241.93	239.59	151.43	142.38	142.68	312.11	430.78	451.95	7868.36	4654.05	4609.31	4478.39	3133.87	4002.46	7057.08	12356.8	15138.4	-0.801402	4.28258e-154	1.08285e-151	false	0.101679	0.812973	0.901788	false	-1.45963	6.08334e-16	1.6605e-14	down	0.658056	0.000128992	0.000762747	false	1340	K01859 chalcone isomerase [EC:5.5.1.6] | (RefSeq) probable chalcone--flavonone isomerase 3 isoform X1 (A)	unknown [Picea sitchensis]	CFI3_ARATH RecName: Full=Probable chalcone--flavonone isomerase 3; Short=Chalcone isomerase 3; EC=5.5.1.6; AltName: Full=Chalcone isomerase-like 1;	A9NRN8_PICSI SubName: Full=Uncharacterized protein {ECO:0000313|EMBL:ABK23299.1};	--	GO:0005783,endoplasmic reticulum; GO:0045430,chalcone isomerase activity; GO:0009813,flavonoid biosynthetic process; GO:0080167,response to karrikin; GO:0003674,molecular_function; GO:0003824,catalytic activity; GO:0016853,isomerase activity; GO:0016872,intramolecular lyase activity; GO:0008152,metabolic process; GO:0008150,biological_process; GO:0009058,biosynthetic process; GO:0009812,flavonoid…	Chalcone-flavanone isomerase	--	--	--
chalcone synthase	Cluster-27241.71779	4.49	6.63	5.43	3.58	5.81	4.57	39.57	49.11	46.06	191.35	167.89	137.87	139.47	168.44	168.73	1181.56	1854.85	2027.53	-0.317164	0.166423	0.275517	false	2.09949	0.0111353	0.0558583	false	-3.28201	1.26536e-45	1.82e-43	down	2.9688	8.48343e-47	1.1282e-44	up	NA	NA	NA	NA	NA	NA	NA	NA	NA	NA	NA
	Cluster-27241.71778	93.5	82.31	57.45	5.83	6.34	4.99	82.18	63.34	104.53	3729.12	1952.6	1366.69	212.6	172.12	172.42	2297.26	2240.77	4311.6	-3.83923	1.73461e-65	1.42305e-63	down	-0.871966	0.403799	0.609033	false	-3.87097	8.68171e-66	2.20097e-63	down	0.0356378	0.888614	0.938446	false	NA	NA	NA	NA	NA	NA	NA	NA	NA	NA	NA
	Cluster-27241.67714	72.82	75.81	71.41	9.4	12.41	9.3	414.49	443.63	489.99	907.99	559.71	515.19	106	104.31	100.88	3519.79	4878.98	6374.66	-2.90445	1.04154e-127	2.05172e-125	down	1.58702	0.221897	0.423014	false	-5.45098	1.50623e-210	4.82527e-207	down	2.55685	1.38488e-99	7.69367e-97	up	NA	NA	NA	NA	NA	NA	NA	NA	NA	NA	NA
	Cluster-27241.83739	23.27	42.38	39.97	14.37	13.84	4.8	123.4	209.57	232.65	66.77	70.71	58.7	35.53	25.56	12.18	218.98	514.76	717.36	-1.72263	4.05912e-05	0.000175154	down	1.48879	0.15024	0.330189	false	-4.13995	7.76207e-18	2.50943e-16	down	2.41712	1.0525e-09	1.43404e-08	up	NA	NA	NA	NA	NA	NA	NA	NA	NA	NA	NA
	Cluster-27241.78080	34.74	31.18	23.72	20.5	22.97	17.19	181.84	184.27	187.53	105.93	55.34	37.29	54.02	45.22	46.34	344.74	481.94	613.49	-0.637168	0.0254286	0.0582496	false	1.72814	0.0401059	0.136176	false	-3.20635	8.96963e-54	1.68128e-51	down	2.56726	3.16047e-26	1.79933e-24	up	NA	NA	NA	NA	NA	NA	NA	NA	NA	NA	NA
	Cluster-27241.78081	41.65	56.42	45.31	19.31	29.58	25.73	73.92	91.37	71.74	39.82	30.88	19	15.03	17.18	22.27	39.42	71.69	76.17	-0.967006	0.0240924	0.0555768	false	0.0966411	0.871668	0.932944	false	-1.67144	7.22304e-05	0.000460692	down	0.707452	0.0665485	0.161635	false	NA	NA	NA	NA	NA	NA	NA	NA	NA	NA	NA
	Cluster-27241.67717	33.32	37.55	40.54	37.34	36.41	27.01	500.37	820.23	816.5	62.53	40.7	36.85	59.12	43.06	45.24	558.73	1297.87	1666.44	-0.182922	0.493104	0.626965	false	3.32036	0.00128808	0.0107928	up	-4.44211	1.75826e-40	2.03146e-38	down	4.25792	1.08581e-38	1.10978e-36	up	NA	NA	NA	NA	NA	NA	NA	NA	NA	NA	NA
	Cluster-27241.68655	91.34	95.39	92.95	34.99	40.64	43.21	420.86	602.68	646.83	127.81	76.79	60.39	40.68	35.28	54.3	340.74	702.99	993.21	-1.24865	1.14216e-06	6.24071e-06	down	1.67939	0.0758501	0.209431	false	-3.82467	1.33824e-28	9.41285e-27	down	2.58014	1.25441e-16	3.6126e-15	up	NA	NA	NA	NA	NA	NA	NA	NA	NA	NA	NA
	Cluster-27241.64631	182.24	179.2	165.66	71.54	79.48	84.16	140.93	161.34	174.19	980.67	566.13	487.8	340.71	282.56	396.94	492.96	756.53	992.23	-1.21468	3.8644e-27	1.12389e-25	down	-0.617581	0.0683801	0.195651	false	-1.01764	2.67673e-07	2.48945e-06	down	-0.191465	0.259828	0.433398	false	434	K00660 chalcone synthase [EC:2.3.1.74] | (RefSeq) chalcone synthase 9-like (A)	pinocembrin chalcone synthase [Pinus densiflora]	CHSY_PINST RecName: Full=Chalcone synthase; EC=2.3.1.74; AltName: Full=Naringenin-chalcone synthase;	T1WVA3_9SPER SubName: Full=Pinocembrin chalcone synthase {ECO:0000313|EMBL:AGU43679.1};	--	GO:0016210,naringenin-chalcone synthase activity; GO:0009813,flavonoid biosynthetic process; GO:0003674,molecular_function; GO:0003824,catalytic activity; GO:0016740,transferase activity; GO:0016746,transferase activity, transferring acyl groups; GO:0016747,transferase activity, transferring acyl groups other than amino-acyl groups; GO:0008152,metabolic process; GO:0008150,biological_process; GO:…	--	--	--	--
	Cluster-27241.71760	134.88	147.77	160.54	74.4	87.34	87.43	409.48	616.31	541.11	3442.01	2240.39	2424.74	1732.3	1513.73	1935.41	7270.58	13930.6	14313	-0.898956	2.55524e-22	5.79497e-21	false	0.96998	0.158494	0.341277	false	-2.65791	3.12964e-37	3.11541e-35	down	1.76	2.93542e-19	1.04558e-17	up	NA	NA	NA	NA	NA	NA	NA	NA	NA	NA	NA
	Cluster-27241.62520	96.94	188.81	179.03	56.48	101.71	103.47	386.69	947.45	597.56	1266.52	1461.21	1356.27	667.94	896.42	1176.04	3447.54	10923.1	8141.73	-0.886633	0.033733	0.0741112	false	1.18403	0.128325	0.297353	false	-2.88824	8.82456e-13	1.74996e-11	down	2.00095	4.54909e-07	4.17725e-06	up	694	K00660 chalcone synthase [EC:2.3.1.74] | (RefSeq) chalcone synthase 1-like (A)	pinocembrin chalcone synthase [Pinus massoniana]	CHSY_PINST RecName: Full=Chalcone synthase; EC=2.3.1.74; AltName: Full=Naringenin-chalcone synthase;	T1WVA3_9SPER SubName: Full=Pinocembrin chalcone synthase {ECO:0000313|EMBL:AGU43679.1};	--	GO:0016210,naringenin-chalcone synthase activity; GO:0009813,flavonoid biosynthetic process; GO:0003674,molecular_function; GO:0003824,catalytic activity; GO:0016740,transferase activity; GO:0016746,transferase activity, transferring acyl groups; GO:0016747,transferase activity, transferring acyl groups other than amino-acyl groups; GO:0008152,metabolic process; GO:0008150,biological_process; GO:…	Chalcone and stilbene synthases, C-terminal domain	--	--	--
	Cluster-27241.71072	9.96	22.99	37.77	77.1	116.59	102.39	7.11	13.83	8.86	406.43	558.13	919.55	2879.76	3240.4	3620.52	203.5	500.67	373.69	1.98987	0.000410716	0.00148231	up	1.11772	0.194789	0.389452	false	3.30312	3.62048e-26	2.17346e-24	up	-1.314	0.00925559	0.0327422	down	NA	NA	NA	NA	NA	NA	NA	NA	NA	NA	NA
	Cluster-27241.71073	187.49	199.46	202.87	95.87	106.65	102.5	204.03	269.02	303.74	8979.05	5683.22	5807.23	4204.82	3480.36	4251.86	6862.59	11432.2	15032.1	-1.02372	4.26149e-64	3.39736e-62	down	-0.196329	0.629339	0.784422	false	-1.35337	3.6187e-13	7.49673e-12	down	0.331164	0.0593336	0.147687	false	NA	NA	NA	NA	NA	NA	NA	NA	NA	NA	NA
	Cluster-27241.70123	69.94	67.98	75.74	159.76	79.46	86.89	2969.63	2980.36	3377.69	20	11	8	35	13	23	428	666	1115	NA	NA	NA	NA	4.53633	6.3281e-05	0.000923884	up	-4.85362	1.11881e-41	1.35951e-39	down	5.47119	7.042e-49	9.94077e-47	up	NA	NA	NA	NA	NA	NA	NA	NA	NA	NA	NA
	Cluster-27241.68657	135.09	175.11	142.73	106.22	106.15	147.21	272.4	663.94	638.7	189.03	140.96	92.74	123.49	92.16	185.02	220.54	774.44	980.73	-0.331642	0.189238	0.304815	false	1.10698	0.103222	0.257291	false	-2.14828	4.44126e-06	3.44347e-05	down	1.81368	3.95423e-05	0.000259477	up	NA	NA	NA	NA	NA	NA	NA	NA	NA	NA	NA
	Cluster-27241.71774	315.27	347.48	343.71	137.66	127.41	133.64	660.02	944.62	889.76	12866.4	8434.86	8368.43	5141.41	3541	4725.71	18883.6	34195.9	37547.9	-1.40754	4.96501e-154	1.24611e-151	down	0.455742	0.503451	0.692641	false	-2.65231	1.29674e-50	2.22907e-48	down	1.24492	9.58112e-13	1.84777e-11	up	NA	NA	NA	NA	NA	NA	NA	NA	NA	NA	NA
	Cluster-27241.71776	205.88	392.56	421.47	110.7	177.17	181.79	457.85	1804.4	1108.86	5358.43	6070.43	6495.23	2629.01	3132.29	4104.04	8294.52	41600	29910.7	-1.18664	0.00145087	0.00467551	down	0.852683	0.369	0.576962	false	-2.8524	3.00739e-09	3.78896e-08	down	1.66318	0.000734527	0.0036688	up	NA	NA	NA	NA	NA	NA	NA	NA	NA	NA	NA
	Cluster-27241.71775	143.22	166.02	166.59	152.23	169.6	170.24	627	885.53	797.07	6559.14	4523.62	4558.39	6384.29	5292.17	6754.05	20158.7	35984	37730.9	-0.0230637	0.770955	0.852418	false	1.48891	0.0130322	0.0624448	false	-2.23622	7.197e-36	6.72719e-34	down	2.21412	4.21434e-36	3.80994e-34	up	NA	NA	NA	NA	NA	NA	NA	NA	NA	NA	NA
	Cluster-27241.71771	397.29	412.35	305.18	244.38	309.38	227.64	500.76	873.14	1052.5	298.77	176.99	97.06	147.65	139.52	155.72	205.34	533.38	885.68	-0.548687	0.0205641	0.0485287	false	0.532222	0.35964	0.568593	false	-1.68435	4.68878e-05	0.000309589	down	1.14142	0.0102364	0.0356325	up	NA	NA	NA	NA	NA	NA	NA	NA	NA	NA	NA
	Cluster-27241.68060	355.13	303.19	256.67	285.6	264.02	359.89	733.37	657.68	579.16	158.83	76.99	44.99	99.92	68.94	147.88	170.93	233.87	294.8	-0.00304285	0.992465	0.995644	false	0.621221	0.150301	0.330304	false	-1.05306	0.00032822	0.00183154	down	1.05398	0.000835494	0.00410935	up	NA	NA	NA	NA	NA	NA	NA	NA	NA	NA	NA
	Cluster-27241.68464	427.87	326.87	404.23	421.88	412.53	414.95	7096.03	8079.17	8919.34	118	51	41	89	65	106	984	1739	2843	0.125313	0.640002	0.752909	false	3.49658	0.000470291	0.00485254	up	-4.27966	8.36159e-45	1.16005e-42	down	4.41341	3.54516e-42	4.03002e-40	up	NA	NA	NA	NA	NA	NA	NA	NA	NA	NA	NA
	Cluster-27241.67715	1121.59	1121.08	1072.59	893.59	926.77	918.84	2441.5	2757.91	2401.73	487.42	276.55	181.94	303.36	234.82	367.05	551.64	951.8	1188.96	-0.264889	0.152116	0.256328	false	0.641693	0.169292	0.355691	false	-1.45634	2.33271e-10	3.41656e-09	down	1.19581	2.72215e-06	2.20253e-05	up	NA	NA	NA	NA	NA	NA	NA	NA	NA	NA	NA
flavonoid 3',5'-hydroxylase	Cluster-27241.92665	2.46	2.89	1.73	5.14	5.09	4.87	1.63	2.18	3.17	45.99	32	19	87.4	64.36	79	21	36	61.52	1.01417	0.000255933	0.000962755	up	0.563986	0.218532	0.41932	false	1.08158	0.00311945	0.0136554	up	-0.068729	0.883286	0.935458	false	NA	NA	NA	NA	NA	NA	NA	NA	NA	NA	NA
	Cluster-27241.66182	173.77	191.36	192.9	34.38	35.43	32.94	832.48	1159.77	1202.5	5757.91	3769.75	3801.58	1041.3	798.65	946.16	19281.9	34068.7	41239.8	-2.51349	0	0	down	1.49755	0.222116	0.423279	false	-4.9653	8.1917e-160	1.25508e-156	down	2.45287	3.92467e-42	4.44675e-40	up	1366	K13083 flavonoid 3',5'-hydroxylase [EC:1.14.14.81] | (RefSeq) flavonoid 3',5'-hydroxylase 2-like (A)	unknown [Picea sitchensis]	C75A3_PETHY RecName: Full=Flavonoid 3',5'-hydroxylase 2; Short=F3'5'H; EC=1.14.13.88; AltName: Full=CYPLXXVA3; AltName: Full=Cytochrome P450 75A3;	A0A0G7ZNZ0_PICGL SubName: Full=Cytochrome P450 CYP75A14v2 {ECO:0000313|EMBL:JAI17649.1};	Cytochrome P450 CYP2 subfamily	GO:0005783,endoplasmic reticulum; GO:0033772,flavonoid 3',5'-hydroxylase activity; GO:0020037,heme binding; GO:0005506,iron ion binding; GO:0009718,anthocyanin-containing compound biosynthetic process; GO:0003674,molecular_function; GO:0003824,catalytic activity; GO:0004497,monooxygenase activity; GO:0016491,oxidoreductase activity; GO:0016705,oxidoreductase activity, acting on paired donors, wit…	Cytochrome P450	--	--	--
	Cluster-27241.66183	121.37	88.43	96.03	47.1	39.22	41.69	97.87	94	79.5	2626.15	1136.02	1224.99	928.41	575.62	782.82	1467.95	1800.08	1785.03	-1.32632	9.89694e-34	3.73833e-32	down	-0.683958	0.048224	0.154272	false	-1.08589	5.9036e-15	1.47023e-13	down	-0.234395	0.171891	0.325702	false	981	K13083 flavonoid 3',5'-hydroxylase [EC:1.14.14.81] | (RefSeq) flavonoid 3',5'-hydroxylase 2-like (A)	unknown [Picea sitchensis]	C75A5_EUSER RecName: Full=Flavonoid 3',5'-hydroxylase; Short=F3'5'H; EC=1.14.13.88; AltName: Full=Cytochrome P450 75A5;	A0A0G7ZNZ0_PICGL SubName: Full=Cytochrome P450 CYP75A14v2 {ECO:0000313|EMBL:JAI17649.1};	Cytochrome P450 CYP2 subfamily	GO:0033772,flavonoid 3',5'-hydroxylase activity; GO:0020037,heme binding; GO:0005506,iron ion binding; GO:0009718,anthocyanin-containing compound biosynthetic process; GO:0003674,molecular_function; GO:0003824,catalytic activity; GO:0004497,monooxygenase activity; GO:0016491,oxidoreductase activity; GO:0016705,oxidoreductase activity, acting on paired donors, with incorporation or reduction of mo…	Cytochrome P450	--	--	--
	Cluster-27241.66185	54.65	53.11	54.53	25.46	26.4	21.69	208.2	280.67	298.99	2514.27	1453.61	1499.03	1072.48	827.58	864.44	6724.74	11457.5	14217.6	-1.21841	2.77287e-77	2.79614e-75	down	1.34096	0.158549	0.341355	false	-3.42958	2.11172e-75	7.29556e-73	down	2.21459	6.34621e-40	6.80963e-38	up	1797	K13083 flavonoid 3',5'-hydroxylase [EC:1.14.14.81] | (RefSeq) flavonoid 3',5'-hydroxylase 2-like (A)	unknown [Picea sitchensis]	C75A5_EUSER RecName: Full=Flavonoid 3',5'-hydroxylase; Short=F3'5'H; EC=1.14.13.88; AltName: Full=Cytochrome P450 75A5;	A0A0G7ZNZ0_PICGL SubName: Full=Cytochrome P450 CYP75A14v2 {ECO:0000313|EMBL:JAI17649.1};	Cytochrome P450 CYP2 subfamily	GO:0033772,flavonoid 3',5'-hydroxylase activity; GO:0020037,heme binding; GO:0005506,iron ion binding; GO:0009718,anthocyanin-containing compound biosynthetic process; GO:0003674,molecular_function; GO:0003824,catalytic activity; GO:0004497,monooxygenase activity; GO:0016491,oxidoreductase activity; GO:0016705,oxidoreductase activity, acting on paired donors, with incorporation or reduction of mo…	Cytochrome P450	--	--	--
	Cluster-27241.66190	3.75	7.31	4.15	1.91	1.33	1.77	47.74	60.98	55	179.96	208.79	119.14	83.74	43.39	73.73	1608.78	2596.17	2727.19	-1.66696	1.47911e-08	1.03844e-07	down	2.40299	0.0548469	0.168246	false	-5.0277	2.17651e-128	2.12918e-125	down	3.36662	1.6213e-30	1.17566e-28	up	1863	K13083 flavonoid 3',5'-hydroxylase [EC:1.14.14.81] | (RefSeq) flavonoid 3',5'-hydroxylase 1 (A)	unknown [Picea sitchensis]	C75A2_SOLME RecName: Full=Flavonoid 3',5'-hydroxylase; Short=F3'5'H; EC=1.14.13.88; AltName: Full=CYPLXXVA2; AltName: Full=Cytochrome P450 75A2; AltName: Full=P-450EG1;	C0PRW5_PICSI SubName: Full=Uncharacterized protein {ECO:0000313|EMBL:ACN40555.1};	Cytochrome P450 CYP2 subfamily	GO:0033772,flavonoid 3',5'-hydroxylase activity; GO:0020037,heme binding; GO:0005506,iron ion binding; GO:0009718,anthocyanin-containing compound biosynthetic process; GO:0003674,molecular_function; GO:0003824,catalytic activity; GO:0004497,monooxygenase activity; GO:0016491,oxidoreductase activity; GO:0016705,oxidoreductase activity, acting on paired donors, with incorporation or reduction of mo…	Cytochrome P450	--	--	--
	Cluster-27241.66191	91.92	81.97	101.74	27.52	25.16	32.83	382.01	627.05	618.56	142.11	73.01	74.11	35.54	24.26	45.49	345.02	811.35	1046.22	-1.68607	5.05138e-11	4.78878e-10	down	1.64727	0.10402	0.2586	false	-4.2575	2.93945e-30	2.19456e-28	down	2.57208	1.15145e-15	3.02059e-14	up	286	K13083 flavonoid 3',5'-hydroxylase [EC:1.14.14.81] | (RefSeq) flavonoid 3',5'-hydroxylase 2-like (A)	unknown [Picea sitchensis]	C75A2_SOLME RecName: Full=Flavonoid 3',5'-hydroxylase; Short=F3'5'H; EC=1.14.13.88; AltName: Full=CYPLXXVA2; AltName: Full=Cytochrome P450 75A2; AltName: Full=P-450EG1;	A0A0G7ZNZ0_PICGL SubName: Full=Cytochrome P450 CYP75A14v2 {ECO:0000313|EMBL:JAI17649.1};	Cytochrome P450 CYP2 subfamily	GO:0033772,flavonoid 3',5'-hydroxylase activity; GO:0020037,heme binding; GO:0005506,iron ion binding; GO:0009718,anthocyanin-containing compound biosynthetic process; GO:0003674,molecular_function; GO:0003824,catalytic activity; GO:0004497,monooxygenase activity; GO:0016491,oxidoreductase activity; GO:0016705,oxidoreductase activity, acting on paired donors, with incorporation or reduction of mo…	--	--	--	--
	Cluster-27241.74739	84.22	99.57	97.4	26.97	20.79	12.08	437.4	560.27	499.57	152.32	103.99	84.89	41.09	23.65	19.51	469.16	853.34	983.88	-2.2579	1.78106e-16	2.7505e-15	down	1.45131	0.172742	0.360231	false	-4.65719	1.00099e-50	1.7291e-48	down	2.39967	6.65582e-26	3.73376e-24	up	NA	NA	NA	NA	NA	NA	NA	NA	NA	NA	NA
	Cluster-27241.44923	0.72	0	0.78	0.81	0.22	0.33	18.39	28.07	28.97	5	0	3	5	1	2	84	170	211	NA	NA	NA	NA	4.62869	0.00259761	0.0187989	up	-5.75568	1.27971e-18	4.4255e-17	down	5.53286	1.3522e-16	3.87481e-15	up	487	K13083 flavonoid 3',5'-hydroxylase [EC:1.14.14.81] | (RefSeq) F3'5'H; flavonoid 3',5'-hydroxylase 2 (A)	unknown [Picea sitchensis]	C75A5_EUSER RecName: Full=Flavonoid 3',5'-hydroxylase; Short=F3'5'H; EC=1.14.13.88; AltName: Full=Cytochrome P450 75A5;	C0PRW5_PICSI SubName: Full=Uncharacterized protein {ECO:0000313|EMBL:ACN40555.1};	Cytochrome P450 CYP2 subfamily	GO:0033772,flavonoid 3',5'-hydroxylase activity; GO:0020037,heme binding; GO:0005506,iron ion binding; GO:0009718,anthocyanin-containing compound biosynthetic process; GO:0003674,molecular_function; GO:0003824,catalytic activity; GO:0004497,monooxygenase activity; GO:0016491,oxidoreductase activity; GO:0016705,oxidoreductase activity, acting on paired donors, with incorporation or reduction of mo…	--	--	--	--
	Cluster-27241.66184	0.53	0.66	0.72	0.47	0	1	1.85	1.07	1.4	28.56	20.94	23.17	23.29	0.01	46.4	69.86	50.95	77.76	-0.446393	0.634109	0.748003	false	0.525249	0.581837	0.751223	false	-1.55334	0.171007	0.354854	false	1.11852	0.00562252	0.0215004	up	2054	K13083 flavonoid 3',5'-hydroxylase [EC:1.14.14.81] | (RefSeq) flavonoid 3',5'-hydroxylase 2-like (A)	unknown [Picea sitchensis]	C75A2_SOLME RecName: Full=Flavonoid 3',5'-hydroxylase; Short=F3'5'H; EC=1.14.13.88; AltName: Full=CYPLXXVA2; AltName: Full=Cytochrome P450 75A2; AltName: Full=P-450EG1;	A0A0G7ZNZ0_PICGL SubName: Full=Cytochrome P450 CYP75A14v2 {ECO:0000313|EMBL:JAI17649.1};	Cytochrome P450 CYP2 subfamily	GO:0033772,flavonoid 3',5'-hydroxylase activity; GO:0020037,heme binding; GO:0005506,iron ion binding; GO:0009718,anthocyanin-containing compound biosynthetic process; GO:0003674,molecular_function; GO:0003824,catalytic activity; GO:0004497,monooxygenase activity; GO:0016491,oxidoreductase activity; GO:0016705,oxidoreductase activity, acting on paired donors, with incorporation or reduction of mo…	Cytochrome P450	--	--	--
	Cluster-27241.66186	2.15	8.89	8.6	2.38	8.67	11.15	41.56	272.09	135.03	67.56	166.36	160.72	68.56	185.54	304.24	913.29	7587.96	4398.13	0.116869	0.88932	0.932589	false	3.52387	0.00605865	0.0359056	up	-4.33723	2.65468e-06	2.12997e-05	down	4.45016	9.25113e-07	8.06086e-06	up	1310	K13083 flavonoid 3',5'-hydroxylase [EC:1.14.14.81] | (RefSeq) flavonoid 3',5'-hydroxylase 2-like (A)	unknown [Picea sitchensis]	C75A5_EUSER RecName: Full=Flavonoid 3',5'-hydroxylase; Short=F3'5'H; EC=1.14.13.88; AltName: Full=Cytochrome P450 75A5;	A0A0G7ZNZ0_PICGL SubName: Full=Cytochrome P450 CYP75A14v2 {ECO:0000313|EMBL:JAI17649.1};	Cytochrome P450 CYP2 subfamily	GO:0033772,flavonoid 3',5'-hydroxylase activity; GO:0020037,heme binding; GO:0005506,iron ion binding; GO:0009718,anthocyanin-containing compound biosynthetic process; GO:0003674,molecular_function; GO:0003824,catalytic activity; GO:0004497,monooxygenase activity; GO:0016491,oxidoreductase activity; GO:0016705,oxidoreductase activity, acting on paired donors, with incorporation or reduction of mo…	Cytochrome P450	--	--	--
	Cluster-27241.66187	1.51	0.56	0	0	0.88	0.86	16.96	16.57	13.91	47.53	10.46	0	0	18.88	23.44	372.58	462.14	453.17	NA	NA	NA	NA	3.51817	0.027367	0.105352	false	-4.77225	9.90639e-08	9.83078e-07	down	4.44695	4.44453e-07	4.08887e-06	up	1310	K13083 flavonoid 3',5'-hydroxylase [EC:1.14.14.81] | (RefSeq) flavonoid 3',5'-hydroxylase 2-like (A)	unknown [Picea sitchensis]	C75A5_EUSER RecName: Full=Flavonoid 3',5'-hydroxylase; Short=F3'5'H; EC=1.14.13.88; AltName: Full=Cytochrome P450 75A5;	A0A0G7ZNZ0_PICGL SubName: Full=Cytochrome P450 CYP75A14v2 {ECO:0000313|EMBL:JAI17649.1};	Cytochrome P450 CYP2 subfamily	GO:0033772,flavonoid 3',5'-hydroxylase activity; GO:0020037,heme binding; GO:0005506,iron ion binding; GO:0009718,anthocyanin-containing compound biosynthetic process; GO:0003674,molecular_function; GO:0003824,catalytic activity; GO:0004497,monooxygenase activity; GO:0016491,oxidoreductase activity; GO:0016705,oxidoreductase activity, acting on paired donors, with incorporation or reduction of mo…	Cytochrome P450	--	--	--
	Cluster-27241.74738	0.35	1.45	0.29	0.56	1.99	0.59	45.72	72.01	72.39	2.62	6.48	1.21	3.81	10.07	3.92	229.6	477.58	575.64	NA	NA	NA	NA	5.56405	8.13833e-05	0.00112974	up	-5.98675	3.14389e-31	2.47294e-29	down	6.61061	1.28015e-29	8.87191e-28	up	NA	NA	NA	NA	NA	NA	NA	NA	NA	NA	NA
	Cluster-27241.92664	5.76	4.43	6.53	7.53	8.85	7.57	21.78	27.02	28.01	114.01	52	76	135.6	118.64	130	298	473	575.48	0.447419	0.0293207	0.0658128	false	1.52611	0.00384174	0.025477	up	-1.68879	9.11111e-17	2.65688e-15	down	2.13913	7.24291e-20	2.72055e-18	up	NA	NA	NA	NA	NA	NA	NA	NA	NA	NA	NA
	Cluster-27241.76798	18.29	16.13	17.02	26.31	31.51	24.71	10.84	12.45	8.56	31.45	16	14	38	34	38	11	18	16.05	0.643809	0.0791016	0.151137	false	0.113252	0.82994	0.910565	false	1.38439	0.00128624	0.00625009	up	NA	NA	NA	NA	NA	NA	NA	NA	NA	NA	NA	NA	NA	NA	NA
flavonoid 3'-monooxygenase	Cluster-27241.101996	1.62	1.24	1.54	3.35	2.98	3.57	5.89	8.91	8.58	79	36	45	150	99	151	202	386.06	433	1.09129	3.40907e-07	2.00323e-06	up	1.84911	2.86089e-05	0.000468917	up	-1.24666	7.9099e-07	6.87899e-06	down	2.34273	6.20625e-17	1.84124e-15	up	1891	K05280 flavonoid 3'-monooxygenase [EC:1.14.14.82] | (RefSeq) flavonoid 3'-monooxygenase-like (A)	unknown [Picea sitchensis]	C76BA_SWEMU RecName: Full=Geraniol 8-hydroxylase; EC=1.14.13.152; AltName: Full=Cytochrome P450 76B10; AltName: Full=Geraniol 10-hydroxylase; Short=SmG10H;	A0A0G7ZP23_PICGL SubName: Full=Cytochrome P450 CYP76Z1 {ECO:0000313|EMBL:JAI17692.1};	Cytochrome P450 CYP2 subfamily	GO:0005789,endoplasmic reticulum membrane; GO:0016021,integral component of membrane; GO:0102811,geraniol 10-hydroxylase activity; GO:0020037,heme binding; GO:0005506,iron ion binding; GO:0016709,oxidoreductase activity, acting on paired donors, with incorporation or reduction of molecular oxygen, NAD(P)H as one donor, and incorporation of one atom of oxygen; GO:0016099,monoterpenoid biosynthetic…	Cytochrome P450	--	--	--
	Cluster-27241.34875	1.16	0	0.46	5.31	5.4	5.19	3.68	3.03	2.2	9.02	0	2	37.09	28.12	35.37	19.08	20.72	18.05	3.07227	2.09759e-05	9.50267e-05	up	2.71755	0.000102507	0.00137208	up	0.848178	0.0427667	0.124027	false	NA	NA	NA	NA	517	K05280 flavonoid 3'-monooxygenase [EC:1.14.14.82] | (RefSeq) uncharacterized protein LOC100279887 (A)	unknown [Picea sitchensis]	C71BB_ARATH RecName: Full=Cytochrome P450 71B11; EC=1.14.-.-;	B8LPD9_PICSI SubName: Full=Uncharacterized protein {ECO:0000313|EMBL:ABR17519.1};	Cytochrome P450 CYP2 subfamily	GO:0016021,integral component of membrane; GO:0005886,plasma membrane; GO:0020037,heme binding; GO:0005506,iron ion binding; GO:0016709,oxidoreductase activity, acting on paired donors, with incorporation or reduction of molecular oxygen, NAD(P)H as one donor, and incorporation of one atom of oxygen; GO:0044550,secondary metabolite biosynthetic process; GO:0003674,molecular_function; GO:0005488,b…	Cytochrome P450	--	--	--
	Cluster-27241.70909	181.45	192.35	193.13	97.47	95.25	81.63	345	379.4	436.75	2609.22	1639.19	1616.46	1270.45	925.06	1020.6	3397.57	4817.35	6541.74	-1.11345	2.07761e-71	1.91808e-69	down	0.275919	0.627544	0.783203	false	-2.08781	4.80619e-46	7.08641e-44	down	0.97538	3.45245e-13	7.00332e-12	false	NA	NA	NA	NA	NA	NA	NA	NA	NA	NA	NA
	Cluster-27241.25913	0.4	0.19	0.1	0.7	0.25	0.53	11.76	15.41	16.75	7	2	1	11	3	8	141	237	303	NA	NA	NA	NA	4.93931	0.000143195	0.00181316	up	-4.85763	1.85941e-28	1.30008e-26	down	5.77811	2.01848e-24	1.03744e-22	up	839	K05280 flavonoid 3'-monooxygenase [EC:1.14.14.82] | (RefSeq) flavonoid 3'-monooxygenase-like (A)	unknown [Picea sitchensis]	C75A1_PINTA RecName: Full=Cytochrome P450 750A1; EC=1.14.-.-; AltName: Full=Cytochrome P450 CYPC;	C0PS63_PICSI SubName: Full=Uncharacterized protein {ECO:0000313|EMBL:ACN40653.1};	Cytochrome P450 CYP2 subfamily	GO:0016021,integral component of membrane; GO:0020037,heme binding; GO:0005506,iron ion binding; GO:0004497,monooxygenase activity; GO:0016705,oxidoreductase activity, acting on paired donors, with incorporation or reduction of molecular oxygen; GO:0003674,molecular_function; GO:0005488,binding; GO:0046906,tetrapyrrole binding; GO:0048037,cofactor binding; GO:0097159,organic cyclic compound bindi…	Cytochrome P450	--	--	--
	Cluster-27241.67336	7.49	6.68	6.33	2.76	2.31	2.04	29.18	48.02	49.96	25	13	11	8	5	6	61	137.83	178.43	NA	NA	NA	NA	1.6817	0.1181	0.281375	false	-4.18021	2.64568e-15	6.85019e-14	down	2.59666	4.30422e-09	5.43717e-08	up	NA	NA	NA	NA	NA	NA	NA	NA	NA	NA	NA
	Cluster-27241.67338	34.1	41.53	42.06	42.7	21.92	34.2	73.15	126.57	124.97	113.78	80.76	73.14	123.64	47.41	100.72	152.92	363.27	446.34	-0.273547	0.307334	0.441307	false	0.821795	0.156252	0.338299	false	-1.72826	1.45322e-05	0.00010434	down	1.44741	1.5409e-05	0.000109185	up	NA	NA	NA	NA	NA	NA	NA	NA	NA	NA	NA
	Cluster-27241.69610	222.85	306.14	312.57	116.54	160.55	195.38	614.38	1125.96	794.67	2506	2037	2024	1183	1215	1913	4684	11158	9337	-0.886854	0.00152572	0.00489484	false	0.782413	0.239219	0.442609	false	-2.42343	3.93246e-14	8.94038e-13	down	1.53744	3.48805e-08	3.87556e-07	up	NA	NA	NA	NA	NA	NA	NA	NA	NA	NA	NA
	Cluster-27241.70910	119.79	166.42	180.82	79.37	105.5	121.22	606.58	836.1	601.95	2237.78	1844.81	1983.54	1348.55	1334.94	1966.4	7825.41	13813.6	11682.3	-0.672862	0.0104787	0.0271146	false	1.2673	0.0755689	0.208888	false	-2.73968	2.59266e-28	1.78792e-26	down	2.06914	1.49156e-18	5.02201e-17	up	NA	NA	NA	NA	NA	NA	NA	NA	NA	NA	NA
	Cluster-27241.76412	130.57	177.2	160.12	77.05	93.53	86.56	252.06	473.12	425.49	2634	2122	1901	1415	1279	1516	3519	8445	8912	-0.931468	1.19622e-08	8.52913e-08	false	0.526005	0.385143	0.59222	false	-2.16943	3.81742e-15	9.69878e-14	down	1.23775	8.5312e-06	6.3234e-05	up	NA	NA	NA	NA	NA	NA	NA	NA	NA	NA	NA
	Cluster-27241.72706	18.09	16.7	16.99	14.24	11.44	9.81	8.17	7.13	8.71	547.5	300.42	305.41	393.71	235.35	257.4	172.5	191.26	273.01	-0.618983	1.6584e-06	8.85296e-06	false	-0.879023	5.81998e-05	0.00086159	false	0.558096	0.00605337	0.0241552	false	-1.17457	4.49772e-15	1.10815e-13	down	NA	NA	NA	NA	NA	NA	NA	NA	NA	NA	NA
	Cluster-27241.69730	4.22	3.38	1.47	3.73	2.4	3.91	1.68	1.21	1.76	318.18	151.61	66.44	257.56	123.19	255.01	89.32	81.17	136.74	0.0748017	0.821156	0.887336	false	-0.380122	0.415611	0.619258	false	1.11161	0.00024364	0.00139717	up	-1.02823	0.0185374	0.0584816	false	NA	NA	NA	NA	NA	NA	NA	NA	NA	NA	NA
	Cluster-27241.69736	44.86	54.33	55.16	37.23	42.83	43.4	57	111.07	98.44	2618.46	1887.32	1928.64	1991.87	1704.71	2194.06	2341.25	5755.5	5934.81	-0.393504	9.91297e-05	0.000401232	false	0.26626	0.487947	0.679495	false	-1.11704	6.61251e-05	0.000425138	down	0.722235	0.00888236	0.0316058	false	NA	NA	NA	NA	NA	NA	NA	NA	NA	NA	NA
flavonol synthase	Cluster-27241.57722	0.1	0	0.46	1.18	0.88	1.21	0	0.22	0.2	3.91	0	10.92	43.16	23.96	41.99	0	7.69	8.2	2.50712	0.00183918	0.00578169	up	1.63818	0.239167	0.442609	false	2.90522	0.000405982	0.00222772	up	NA	NA	NA	NA	1599	K05278 flavonol synthase [EC:1.14.20.6] | (RefSeq) flavonol synthase/flavanone 3-hydroxylase-like (A)	unknown [Picea sitchensis]	DIOX5_ARATH RecName: Full=Probable 2-oxoglutarate-dependent dioxygenase At5g05600 {ECO:0000305}; EC=1.14.11.- {ECO:0000305};	A0A0G7ZNS1_PICGL SubName: Full=Putative flavanone 3-dioxygenase {ECO:0000313|EMBL:JAI17680.1}; EC=1.14.11.9 {ECO:0000313|EMBL:JAI17680.1};	Iron/ascorbate family oxidoreductases	GO:0005829,cytosol; GO:0051213,dioxygenase activity; GO:0120091,jasmonic acid hydrolase; GO:0046872,metal ion binding; GO:0097237,cellular response to toxic substance; GO:0009813,flavonoid biosynthetic process; GO:2000022,regulation of jasmonic acid mediated signaling pathway; GO:0080167,response to karrikin; GO:0003674,molecular_function; GO:0003824,catalytic activity; GO:0016491,oxidoreductase …	2OG-Fe(II) oxygenase superfamily	--	--	--
	Cluster-27241.67238	0	0	0	2.1	2.89	2.69	1.55	1.49	0.88	0	0	0	66.76	68.48	81.1	37.87	46.13	31.66	8.34503	9.0175e-12	9.28383e-11	up	7.93761	4.48192e-10	2.30064e-08	up	0.964954	0.0110609	0.0404499	false	7.39256	4.9378e-08	5.33661e-07	up	NA	NA	NA	NA	NA	NA	NA	NA	NA	NA	NA
	Cluster-27241.56533	5.79	6.74	3.38	1.38	4.08	1.66	3.14	3.46	6.56	254.39	176.19	88.69	55.6	121.96	63.22	96.64	134.85	297.86	-1.23809	0.00189237	0.00592855	down	-0.719443	0.151338	0.331839	false	-0.894505	0.0994745	0.238348	false	-0.336478	0.417105	0.593153	false	1727	K05278 flavonol synthase [EC:1.14.20.6] | (RefSeq) flavonol synthase/flavanone 3-hydroxylase-like (A)	unknown [Picea sitchensis]	LDOX_MALDO RecName: Full=Leucoanthocyanidin dioxygenase; Short=LDOX; Short=Leucocyanidin oxygenase; EC=1.14.11.19 {ECO:0000250|UniProtKB:Q96323}; AltName: Full=Anthocyanidin synthase; AltName: Full=Leucoanthocyanidin hydroxylase;	A9NLF0_PICSI SubName: Full=Uncharacterized protein {ECO:0000313|EMBL:ABK21461.1};	Iron/ascorbate family oxidoreductases	GO:0031418,L-ascorbic acid binding; GO:0050589,leucocyanidin oxygenase activity; GO:0046872,metal ion binding; GO:0009718,anthocyanin-containing compound biosynthetic process; GO:0003674,molecular_function; GO:0030246,carbohydrate binding; GO:0005488,binding; GO:0019842,vitamin binding; GO:0031406,carboxylic acid binding; GO:0036094,small molecule binding; GO:0043167,ion binding; GO:0043168,anion…	2OG-Fe(II) oxygenase superfamily	--	--	--
	Cluster-27241.124385	0.29	0.21	0.17	0	0.03	0	1.06	1.84	1.04	11.05	4.84	3.92	0	0.81	0	28.4	62.47	41.1	NA	NA	NA	NA	1.47103	0.364027	0.572411	false	-6.83446	2.76114e-07	2.56187e-06	down	2.43179	5.88638e-05	0.000373118	up	NA	NA	NA	NA	NA	NA	NA	NA	NA	NA	NA
	Cluster-27241.2238	0.05	0	0	0	0	0	2.37	3.2	3.08	1	0	0	0	0	0	36	62	70	NA	NA	NA	NA	5.90346	0.0224475	0.0918905	false	-8.13223	2.09649e-10	3.0834e-09	down	6.89955	5.83958e-08	6.23491e-07	up	989	K05278 flavonol synthase [EC:1.14.20.6] | (RefSeq) flavonol synthase/flavanone 3-hydroxylase-like (A)	probable 2-oxoglutarate-dependent dioxygenase At3g111800 [Jatropha curcas]	DIOX6_ARATH RecName: Full=Probable 2-oxoglutarate-dependent dioxygenase At3g111800 {ECO:0000305}; EC=1.14.11.- {ECO:0000305};	A0A0G7ZNR0_PICGL SubName: Full=Putative flavanone 3-dioxygenase {ECO:0000313|EMBL:JAI17625.1}; EC=1.14.11.9 {ECO:0000313|EMBL:JAI17625.1};	Iron/ascorbate family oxidoreductases	GO:0051213,dioxygenase activity; GO:0046872,metal ion binding; GO:0009813,flavonoid biosynthetic process; GO:0003674,molecular_function; GO:0003824,catalytic activity; GO:0016491,oxidoreductase activity; GO:0005488,binding; GO:0043167,ion binding; GO:0043169,cation binding; GO:0008152,metabolic process; GO:0008150,biological_process; GO:0009058,biosynthetic process; GO:0009812,flavonoid metabolic…	non-haem dioxygenase in morphine synthesis N-terminal	--	--	--
	Cluster-27241.2574	0	0	0	0	0	0	1.47	1.95	1.78	0	0	0	0	0	0	26	44	47	0.345681	0.3522	0.489689	false	6.34136	0.0300203	0.112217	false	-7.61605	6.47145e-09	7.73567e-08	down	7.3438	2.86745e-08	3.24143e-07	up	1108	K05278 flavonol synthase [EC:1.14.20.6] | (RefSeq) flavonol synthase/flavanone 3-hydroxylase-like (A)	PREDICTED: leucoanthocyanidin dioxygenase-like [Solanum pennellii]	DIOX6_ARATH RecName: Full=Probable 2-oxoglutarate-dependent dioxygenase At3g111800 {ECO:0000305}; EC=1.14.11.- {ECO:0000305};	A0A0G7ZNU4_PICGL SubName: Full=Putative flavanone 3-dioxygenase {ECO:0000313|EMBL:JAI17628.1}; EC=1.14.11.9 {ECO:0000313|EMBL:JAI17628.1};	Iron/ascorbate family oxidoreductases	GO:0051213,dioxygenase activity; GO:0046872,metal ion binding; GO:0009813,flavonoid biosynthetic process; GO:0003674,molecular_function; GO:0003824,catalytic activity; GO:0016491,oxidoreductase activity; GO:0005488,binding; GO:0043167,ion binding; GO:0043169,cation binding; GO:0008152,metabolic process; GO:0008150,biological_process; GO:0009058,biosynthetic process; GO:0009812,flavonoid metabolic…	2OG-Fe(II) oxygenase superfamily	--	--	--
	Cluster-27241.66634	15.47	15.52	14.47	15.29	13.67	14.43	26.24	51.77	52.14	387.51	230.95	214.42	349.21	232.51	313.52	457.07	1148.15	1353.55	-0.134153	0.203031	0.321679	false	0.868185	0.0853005	0.226582	false	-1.59333	3.02323e-07	2.78451e-06	down	1.4574	1.63361e-06	1.36972e-05	up	1095	K05278 flavonol synthase [EC:1.14.20.6] | (RefSeq) flavonol synthase/flavanone 3-hydroxylase (A)	unknown [Picea sitchensis]	DIOX4_ARATH RecName: Full=Probable 2-oxoglutarate-dependent dioxygenase ANS {ECO:0000305}; EC=1.14.11.- {ECO:0000305}; AltName: Full=Anthocyanidin synthase {ECO:0000305};	C0PSL2_PICSI SubName: Full=Uncharacterized protein {ECO:0000313|EMBL:ACN40802.1};	Iron/ascorbate family oxidoreductases	GO:0005829,cytosol; GO:0051213,dioxygenase activity; GO:0120091,jasmonic acid hydrolase; GO:0046872,metal ion binding; GO:0009813,flavonoid biosynthetic process; GO:2000022,regulation of jasmonic acid mediated signaling pathway; GO:0003674,molecular_function; GO:0003824,catalytic activity; GO:0016491,oxidoreductase activity; GO:0016787,hydrolase activity; GO:0016810,hydrolase activity, acting on …	2OG-Fe(II) oxygenase superfamily	--	--	--
leucoanthocyanidin reductase	Cluster-27241.42412	0	0	0.07	0.09	0	0.1	68.17	87.04	85.44	0	0	1	2	0	2	1144	1861	2139	NA	NA	NA	NA	10.8212	6.09749e-05	0.000895863	up	-10.2282	2.40329e-42	2.99256e-40	down	11.8356	2.17044e-23	1.03832e-21	up	1065	K13081 leucoanthocyanidin reductase [EC:1.17.1.3] | (RefSeq) leucoanthocyanidin reductase (A)	leucoanthocyanidin reductase 1 [Picea abies]	LAR_DESUN RecName: Full=Leucoanthocyanidin reductase; Short=Leucocyanidin reductase; EC=1.17.1.3;	X2CXM7_PICAB SubName: Full=Leucoanthocyanidin reductase 1 {ECO:0000313|EMBL:AHB89627.1}; EC=1.17.1.3 {ECO:0000313|EMBL:AHB89627.1};	--	GO:0033788,leucoanthocyanidin reductase activity; GO:0010023,proanthocyanidin biosynthetic process; GO:0003674,molecular_function; GO:0003824,catalytic activity; GO:0016491,oxidoreductase activity; GO:0016725,oxidoreductase activity, acting on CH or CH2 groups; GO:0016726,oxidoreductase activity, acting on CH or CH2 groups, NAD or NADP as acceptor; GO:0008152,metabolic process; GO:0006725,cellula…	NmrA-like family	--	--	--
	Cluster-27241.49379	0	0	0.14	0	0.35	0	87.81	103.5	104.15	0	0	1	0	3	0	755	1152	1371	NA	NA	NA	NA	10.0952	0.000747237	0.00700487	up	-9.9842	1.48846e-31	1.18402e-29	down	11.188	4.10524e-21	1.68134e-19	up	679	K13081 leucoanthocyanidin reductase [EC:1.17.1.3] | (RefSeq) leucoanthocyanidin reductase-like (A)	leucoanthocyanidin reductase 1 [Picea abies]	LAR_DESUN RecName: Full=Leucoanthocyanidin reductase; Short=Leucocyanidin reductase; EC=1.17.1.3;	X2CXM7_PICAB SubName: Full=Leucoanthocyanidin reductase 1 {ECO:0000313|EMBL:AHB89627.1}; EC=1.17.1.3 {ECO:0000313|EMBL:AHB89627.1};	--	GO:0033788,leucoanthocyanidin reductase activity; GO:0010023,proanthocyanidin biosynthetic process; GO:0003674,molecular_function; GO:0003824,catalytic activity; GO:0016491,oxidoreductase activity; GO:0016725,oxidoreductase activity, acting on CH or CH2 groups; GO:0016726,oxidoreductase activity, acting on CH or CH2 groups, NAD or NADP as acceptor; GO:0008152,metabolic process; GO:0006725,cellula…	--	--	--	--
	Cluster-27241.50520	0.14	0	0	0.11	0.07	0.09	3.4	1.43	1.57	8.34	0	0	6.05	2.88	4.49	145.05	76.94	98.04	NA	NA	NA	NA	4.50984	0.00350068	0.0237029	up	-4.62274	6.07296e-13	1.23133e-11	down	5.33349	1.36568e-07	1.36942e-06	up	2284	K13081 leucoanthocyanidin reductase [EC:1.17.1.3] | (RefSeq) leucoanthocyanidin reductase (A)	TPA: leucoanthocyanidin reductase [Pinus taeda]	LAR_DESUN RecName: Full=Leucoanthocyanidin reductase; Short=Leucocyanidin reductase; EC=1.17.1.3;	Q3KN81_PINTA SubName: Full=Leucoanthocyanidin reductase {ECO:0000313|EMBL:CAI56321.1}; EC=1.17.1.3 {ECO:0000313|EMBL:CAI56321.1};	--	GO:0033788,leucoanthocyanidin reductase activity; GO:0010023,proanthocyanidin biosynthetic process; GO:0003674,molecular_function; GO:0003824,catalytic activity; GO:0016491,oxidoreductase activity; GO:0016725,oxidoreductase activity, acting on CH or CH2 groups; GO:0016726,oxidoreductase activity, acting on CH or CH2 groups, NAD or NADP as acceptor; GO:0008152,metabolic process; GO:0006725,cellula…	--	--	--	--
	Cluster-27241.50521	16.14	17.59	16.62	34.23	34.5	33.98	376.16	446.82	440.97	800.66	519	493	1554.95	1166.12	1459.51	13107	19664.1	22597	0.961566	5.04865e-51	3.09888e-49	false	3.6943	0.000182998	0.00223081	up	-3.62692	1.98752e-207	5.00274e-204	down	4.5864	4.97607e-308	5.71319e-304	up	1917	K13081 leucoanthocyanidin reductase [EC:1.17.1.3] | (RefSeq) leucoanthocyanidin reductase (A)	TPA: leucoanthocyanidin reductase [Pinus taeda]	LAR_DESUN RecName: Full=Leucoanthocyanidin reductase; Short=Leucocyanidin reductase; EC=1.17.1.3;	Q3KN81_PINTA SubName: Full=Leucoanthocyanidin reductase {ECO:0000313|EMBL:CAI56321.1}; EC=1.17.1.3 {ECO:0000313|EMBL:CAI56321.1};	--	GO:0033788,leucoanthocyanidin reductase activity; GO:0010023,proanthocyanidin biosynthetic process; GO:0003674,molecular_function; GO:0003824,catalytic activity; GO:0016491,oxidoreductase activity; GO:0016725,oxidoreductase activity, acting on CH or CH2 groups; GO:0016726,oxidoreductase activity, acting on CH or CH2 groups, NAD or NADP as acceptor; GO:0008152,metabolic process; GO:0006725,cellula…	NmrA-like family	--	--	--
	Cluster-27241.75820	0.78	0.94	1.6	1.93	1.72	1.23	6.16	3.48	3.29	31.41	22.62	38.54	71.31	47.16	42.84	173.89	124.4	137.02	0.481832	0.200132	0.317993	false	1.33437	0.0163409	0.0733507	false	-1.4082	0.000188019	0.00110298	down	1.88884	4.3626e-05	0.000284163	up	NA	NA	NA	NA	NA	NA	NA	NA	NA	NA	NA
	Cluster-27241.75821	65.59	62.94	62.53	70.54	67.38	62.04	246.06	205.58	219.37	3636.62	2076.79	2075.45	3584.52	2547.06	2979.19	9596.3	10117.5	12564	-0.00907282	0.831732	0.894277	false	1.1164	0.0224819	0.0919701	false	-1.75117	1.5211e-68	4.32276e-66	down	1.74718	2.95112e-65	6.73169e-63	up	NA	NA	NA	NA	NA	NA	NA	NA	NA	NA	NA
naringenin 3-dioxygenase	Cluster-27241.62431	0.58	0.77	0.25	0.08	1.29	2.19	12.31	226.42	162.96	22.91	18.14	5.98	3.07	34.71	75.14	341.2	7944.19	6666.21	1.10495	0.213787	0.334249	false	6.93232	5.95398e-05	0.000878266	up	-6.80838	1.17605e-06	9.99347e-06	down	7.91241	5.40494e-13	1.07549e-11	up	1581	K00475 naringenin 3-dioxygenase [EC:1.14.11.9] | (RefSeq) naringenin,2-oxoglutarate 3-dioxygenase-like (A)	flavanone 3-hydroxylase [Pinus radiata]	FL3H_MALDO RecName: Full=Naringenin,2-oxoglutarate 3-dioxygenase; EC=1.14.11.9 {ECO:0000250|UniProtKB:Q7XZQ7}; AltName: Full=FHT; AltName: Full=Flavanone-3-hydroxylase; Short=F3H;	A0A088BGJ0_PINRA SubName: Full=Flavanone 3-hydroxylase {ECO:0000313|EMBL:AGY80772.1};	Iron/ascorbate family oxidoreductases	GO:0031418,L-ascorbic acid binding; GO:0046872,metal ion binding; GO:0045486,naringenin 3-dioxygenase activity; GO:0009813,flavonoid biosynthetic process; GO:0003674,molecular_function; GO:0030246,carbohydrate binding; GO:0005488,binding; GO:0019842,vitamin binding; GO:0031406,carboxylic acid binding; GO:0036094,small molecule binding; GO:0043167,ion binding; GO:0043168,anion binding; GO:0043177,…	2OG-Fe(II) oxygenase superfamily	--	--	--
	Cluster-27241.63895	46.32	38.76	44.19	31.87	30.2	22.23	152.48	69.25	141.78	2374.71	1182.49	1355.13	1496.83	1055.4	987.03	5494.01	3150.59	7510.17	-0.69411	6.44105e-10	5.41393e-09	false	0.716662	0.232573	0.434965	false	-2.11061	2.24802e-11	3.74552e-10	down	1.42341	2.29173e-06	1.87409e-05	up	1973	K00475 naringenin 3-dioxygenase [EC:1.14.11.9] | (RefSeq) naringenin,2-oxoglutarate 3-dioxygenase-like (A)	flavanone 3-hydroxylase [Pinus radiata]	FL3H_MALDO RecName: Full=Naringenin,2-oxoglutarate 3-dioxygenase; EC=1.14.11.9 {ECO:0000250|UniProtKB:Q7XZQ7}; AltName: Full=FHT; AltName: Full=Flavanone-3-hydroxylase; Short=F3H;	A0A088BGJ0_PINRA SubName: Full=Flavanone 3-hydroxylase {ECO:0000313|EMBL:AGY80772.1};	Iron/ascorbate family oxidoreductases	GO:0031418,L-ascorbic acid binding; GO:0046872,metal ion binding; GO:0045486,naringenin 3-dioxygenase activity; GO:0009813,flavonoid biosynthetic process; GO:0003674,molecular_function; GO:0030246,carbohydrate binding; GO:0005488,binding; GO:0019842,vitamin binding; GO:0031406,carboxylic acid binding; GO:0036094,small molecule binding; GO:0043167,ion binding; GO:0043168,anion binding; GO:0043177,…	2OG-Fe(II) oxygenase superfamily	--	--	--
	Cluster-27241.64660	2.85	9.06	3.54	0.6	1.39	4.67	73.03	48.02	46.43	140.3	265.24	104.24	27.21	46.68	199.14	2525.93	2097.64	2361.65	-1.26433	0.181166	0.294444	false	2.42451	0.0610788	0.18103	false	-4.62938	1.29084e-12	2.50899e-11	down	3.37577	1.4585e-13	3.08389e-12	up	1905	K00475 naringenin 3-dioxygenase [EC:1.14.11.9] | (RefSeq) naringenin,2-oxoglutarate 3-dioxygenase-like (A)	flavanone 3-hydroxylase [Pinus radiata]	FL3H_MALDO RecName: Full=Naringenin,2-oxoglutarate 3-dioxygenase; EC=1.14.11.9 {ECO:0000250|UniProtKB:Q7XZQ7}; AltName: Full=FHT; AltName: Full=Flavanone-3-hydroxylase; Short=F3H;	A0A088BGJ0_PINRA SubName: Full=Flavanone 3-hydroxylase {ECO:0000313|EMBL:AGY80772.1};	Iron/ascorbate family oxidoreductases	GO:0031418,L-ascorbic acid binding; GO:0046872,metal ion binding; GO:0045486,naringenin 3-dioxygenase activity; GO:0009813,flavonoid biosynthetic process; GO:0003674,molecular_function; GO:0030246,carbohydrate binding; GO:0005488,binding; GO:0019842,vitamin binding; GO:0031406,carboxylic acid binding; GO:0036094,small molecule binding; GO:0043167,ion binding; GO:0043168,anion binding; GO:0043177,…	2OG-Fe(II) oxygenase superfamily	--	--	--
	Cluster-27241.75670	35.62	29.11	28.61	26.98	21.02	24.41	157.82	252.31	325.56	237	114	106	160	93	142	692	1469	2283	-0.427892	0.0171797	0.041607	false	2.07031	0.015109	0.0693088	false	-3.357	2.19259e-24	1.19052e-22	down	2.93378	1.21164e-19	4.42564e-18	up	NA	NA	NA	NA	NA	NA	NA	NA	NA	NA	NA
	Cluster-27241.80805	33.6	35.75	31.2	26.09	25.33	22.41	200.17	330.09	333.75	965.9	610.66	532.01	684.95	494.84	558.66	4012.5	8407.85	9936.72	-0.51728	1.803e-10	1.6127e-09	false	2.15768	0.0281135	0.107388	false	-3.55775	3.28628e-49	5.38629e-47	down	3.04075	1.67091e-38	1.69772e-36	up	NA	NA	NA	NA	NA	NA	NA	NA	NA	NA	NA
	Cluster-27241.61869	244.97	247.44	233.51	164.87	152.22	149.93	12.02	106.24	63.91	14958.2	8992.73	8543.46	9228.8	6339.13	7927.5	516.4	5759.2	4029.3	-0.70961	1.65115e-99	2.24675e-97	false	-1.23818	0.0358486	0.126502	false	1.34091	0.0317877	0.0974408	false	-2.0553	0.00991853	0.0346836	down	2301	K00475 naringenin 3-dioxygenase [EC:1.14.11.9] | (RefSeq) naringenin,2-oxoglutarate 3-dioxygenase-like (A)	flavanone 3-hydroxylase [Pinus radiata]	FL3H_MALDO RecName: Full=Naringenin,2-oxoglutarate 3-dioxygenase; EC=1.14.11.9 {ECO:0000250|UniProtKB:Q7XZQ7}; AltName: Full=FHT; AltName: Full=Flavanone-3-hydroxylase; Short=F3H;	A0A088BGJ0_PINRA SubName: Full=Flavanone 3-hydroxylase {ECO:0000313|EMBL:AGY80772.1};	Iron/ascorbate family oxidoreductases	GO:0031418,L-ascorbic acid binding; GO:0046872,metal ion binding; GO:0045486,naringenin 3-dioxygenase activity; GO:0009813,flavonoid biosynthetic process; GO:0003674,molecular_function; GO:0030246,carbohydrate binding; GO:0005488,binding; GO:0019842,vitamin binding; GO:0031406,carboxylic acid binding; GO:0036094,small molecule binding; GO:0043167,ion binding; GO:0043168,anion binding; GO:0043177,…	2OG-Fe(II) oxygenase superfamily	--	--	--
	Cluster-27241.61396	118.82	129.74	116.19	91.8	89.44	95.18	238.79	180.08	227.74	5864.03	3809.82	3428.84	4149.91	3008.44	4068.6	8280.06	7886.51	11614	-0.471204	2.41145e-17	3.9759e-16	false	0.265468	0.472859	0.667308	false	-1.22728	1.82116e-19	6.74826e-18	down	0.759605	1.00915e-07	1.03604e-06	false	1909	K00475 naringenin 3-dioxygenase [EC:1.14.11.9] | (RefSeq) naringenin,2-oxoglutarate 3-dioxygenase-like (A)	flavanone 3-hydroxylase [Pinus radiata]	FL3H_MALDO RecName: Full=Naringenin,2-oxoglutarate 3-dioxygenase; EC=1.14.11.9 {ECO:0000250|UniProtKB:Q7XZQ7}; AltName: Full=FHT; AltName: Full=Flavanone-3-hydroxylase; Short=F3H;	A0A088BGJ0_PINRA SubName: Full=Flavanone 3-hydroxylase {ECO:0000313|EMBL:AGY80772.1};	Iron/ascorbate family oxidoreductases	GO:0031418,L-ascorbic acid binding; GO:0046872,metal ion binding; GO:0045486,naringenin 3-dioxygenase activity; GO:0009813,flavonoid biosynthetic process; GO:0003674,molecular_function; GO:0030246,carbohydrate binding; GO:0005488,binding; GO:0019842,vitamin binding; GO:0031406,carboxylic acid binding; GO:0036094,small molecule binding; GO:0043167,ion binding; GO:0043168,anion binding; GO:0043177,…	2OG-Fe(II) oxygenase superfamily	--	--	--
	Cluster-27241.64330	64.22	41.96	59.6	35.19	30.26	27.17	94.81	67.61	103.4	3869.93	1504.94	2151.67	1943.96	1243.61	1417.61	4021.23	3616.56	6434.28	-0.914849	1.82571e-06	9.66846e-06	false	0.038289	0.933596	0.967904	false	-1.52484	4.18804e-15	1.05946e-13	down	0.614385	0.00849812	0.0304937	false	2274	K00475 naringenin 3-dioxygenase [EC:1.14.11.9] | (RefSeq) naringenin,2-oxoglutarate 3-dioxygenase-like (A)	flavanone 3-hydroxylase [Pinus radiata]	FL3H_MALDO RecName: Full=Naringenin,2-oxoglutarate 3-dioxygenase; EC=1.14.11.9 {ECO:0000250|UniProtKB:Q7XZQ7}; AltName: Full=FHT; AltName: Full=Flavanone-3-hydroxylase; Short=F3H;	A0A088BGJ0_PINRA SubName: Full=Flavanone 3-hydroxylase {ECO:0000313|EMBL:AGY80772.1};	Iron/ascorbate family oxidoreductases	GO:0031418,L-ascorbic acid binding; GO:0046872,metal ion binding; GO:0045486,naringenin 3-dioxygenase activity; GO:0009813,flavonoid biosynthetic process; GO:0003674,molecular_function; GO:0030246,carbohydrate binding; GO:0005488,binding; GO:0019842,vitamin binding; GO:0031406,carboxylic acid binding; GO:0036094,small molecule binding; GO:0043167,ion binding; GO:0043168,anion binding; GO:0043177,…	2OG-Fe(II) oxygenase superfamily	--	--	--
phlorizin synthase	Cluster-27241.58717	106.42	93.42	108.85	26.94	30.77	28.9	51.36	48.21	46.46	4944.01	2581.89	3021.52	1146.23	974.11	1163	1675.36	1987.32	2230.84	-1.90776	3.8128e-141	8.61235e-139	down	-1.48135	3.41127e-09	1.48356e-07	down	-0.757331	1.97379e-11	3.31685e-10	false	-1.14506	6.56334e-25	3.45669e-23	down	1812	K22845 phlorizin synthase [EC:2.4.1.357] | (RefSeq) UDP-glycosyltransferase 88F5 (A)	unknown [Picea sitchensis]	U72B1_ARATH RecName: Full=UDP-glycosyltransferase 72B1; EC=2.4.1.-; AltName: Full=Arbutin synthase; AltName: Full=Probable hydroquinone glucosyltransferase; EC=2.4.1.218;	A9NXT2_PICSI SubName: Full=Uncharacterized protein {ECO:0000313|EMBL:ABK25443.1};	UDP-glucuronosyl and UDP-glucosyl transferase	GO:0043231,intracellular membrane-bounded organelle; GO:0050505,hydroquinone glucosyltransferase activity; GO:0080043,quercetin 3-O-glucosyltransferase activity; GO:0080044,quercetin 7-O-glucosyltransferase activity; GO:0035251,UDP-glucosyltransferase activity; GO:0008194,UDP-glycosyltransferase activity; GO:0009809,lignin biosynthetic process; GO:0009651,response to salt stress; GO:0009636,respo…	UDP-glucoronosyl and UDP-glucosyl transferase	--	--	--
	Cluster-27241.77149	21.86	26.43	22.11	47.86	43.84	44.06	19.41	19.84	18.78	1030.04	740.97	622.52	2064.88	1407.53	1798.33	642.04	829.53	914.63	0.879248	9.93758e-29	3.10327e-27	false	0.380763	0.299469	0.508387	false	1.221	1.70801e-41	2.05421e-39	up	-0.342056	0.0126748	0.0426006	false	NA	NA	NA	NA	NA	NA	NA	NA	NA	NA	NA
	Cluster-27241.60296	9.34	8.19	7.53	13.67	26.17	15.35	66.59	46.28	51.19	6	3	2	7	10	9	23	24	37	NA	NA	NA	NA	2.06279	0.00732107	0.04138	up	-1.57129	0.00407832	0.0172197	down	2.63312	0.000109867	0.000660081	up	237	K22845 phlorizin synthase [EC:2.4.1.357] | (RefSeq) UDP-glycosyltransferase 88F3 (A)	hypothetical protein 0_2213_01, partial [Pinus taeda]	U88F4_MALDO RecName: Full=UDP-glycosyltransferase 88F4 {ECO:0000303|Ref.1}; EC=2.4.1.- {ECO:0000305}; AltName: Full=UDP-glucose:chalcone 2'-O-glucosyltransferase {ECO:0000305};	H9VPF1_PINTA SubName: Full=Uncharacterized protein {ECO:0000313|EMBL:AFG51644.1}; Flags: Fragment;	UDP-glucuronosyl and UDP-glucosyl transferase	GO:0016758,transferase activity, transferring hexosyl groups; GO:0008152,metabolic process; GO:0003674,molecular_function; GO:0003824,catalytic activity; GO:0016740,transferase activity; GO:0016757,transferase activity, transferring glycosyl groups; GO:0008150,biological_process	--	--	--	--
shikimate O-hydroxycinnamoyltransferase	Cluster-27241.104830	0.03	0.03	0.06	0.79	1.03	1.03	0.13	0.1	0.2	1.41	1.02	2.02	38.72	37.85	48.13	4.81	4.97	11.17	4.72094	1.48699e-08	1.04333e-07	up	3.85509	0.000771161	0.00717824	up	2.69385	5.01753e-07	4.48635e-06	up	NA	NA	NA	NA	NA	NA	NA	NA	NA	NA	NA	NA	NA	NA	NA
	Cluster-27241.105785	1.39	1.47	1.54	10.22	8.99	9.11	1.44	2.47	2.14	59	37	39	397	260	335	43	93	94	2.62912	1.04857e-52	6.71602e-51	up	1.88649	0.00406685	0.026602	up	2.2075	2.98839e-18	9.96292e-17	up	0.408847	0.24096	0.412035	false	NA	NA	NA	NA	NA	NA	NA	NA	NA	NA	NA
	Cluster-27241.108701	0	0	0	1.27	1.38	0.6	0.74	1.63	0.07	0	0	0	59.32	48.14	26.35	26.61	73.71	3.94	7.64346	3.34212e-09	2.5771e-08	up	7.46739	4.77624e-07	1.25724e-05	up	0.366625	0.706202	0.846074	false	7.28174	6.75928e-05	0.000423072	up	NA	NA	NA	NA	NA	NA	NA	NA	NA	NA	NA
	Cluster-27241.30381	1.84	1.25	1.48	12.14	11.72	12.16	0.55	0.75	0.92	77	31	37	465	334	441	16	28	40	2.87355	2.50611e-67	2.107e-65	up	1.9846	0.0435448	0.143738	false	3.98418	1.36205e-60	3.13709e-58	up	-1.09628	0.00716153	0.0264585	down	1658	K13065 shikimate O-hydroxycinnamoyltransferase [EC:2.3.1.133] | (RefSeq) BAHDb5a-2; BAHD family acyltransferase (A)	hypothetical protein AQUCO_04900147v1 [Aquilegia coerulea]	SHT_ARATH RecName: Full=Spermidine hydroxycinnamoyl transferase; EC=2.3.1.-; AltName: Full=BAHD-like hydroxycinnamoyl transferase;	A0A2G5CK34_AQUCA SubName: Full=Uncharacterized protein {ECO:0000313|EMBL:PIA31644.1};	--	GO:0016410,N-acyltransferase activity; GO:0080074,spermidine:caffeoyl CoA N-acyltransferase activity; GO:0080073,spermidine:coumaroyl CoA N-acyltransferase activity; GO:0080075,spermidine:feruloyl CoA N-acyltransferase activity; GO:0080072,spermidine:sinapoyl CoA N-acyltransferase activity; GO:0009555,pollen development; GO:0010584,pollen exine formation; GO:0080088,spermidine hydroxycinnamate co…	Transferase family	--	--	--
	Cluster-27241.38342	0	0	0	3.27	2.62	2.93	1.51	1.09	2.15	0	0	0	161.52	96.23	136.87	57.04	51.93	119.65	9.18413	1.93892e-14	2.5306e-13	up	8.79608	2.40895e-12	1.8574e-10	up	0.889616	0.00715195	0.0278453	false	8.29255	1.83379e-10	2.78071e-09	up	2060	K13065 shikimate O-hydroxycinnamoyltransferase [EC:2.3.1.133] | (RefSeq) BAHDa2-2; BAHD family acyltransferase, clade I (A)	unknown [Picea sitchensis]	SHT_ARATH RecName: Full=Spermidine hydroxycinnamoyl transferase; EC=2.3.1.-; AltName: Full=BAHD-like hydroxycinnamoyl transferase;	B8LQ10_PICSI SubName: Full=Uncharacterized protein {ECO:0000313|EMBL:ABR17740.1};	--	GO:0016410,N-acyltransferase activity; GO:0080074,spermidine:caffeoyl CoA N-acyltransferase activity; GO:0080073,spermidine:coumaroyl CoA N-acyltransferase activity; GO:0080075,spermidine:feruloyl CoA N-acyltransferase activity; GO:0080072,spermidine:sinapoyl CoA N-acyltransferase activity; GO:0009555,pollen development; GO:0010584,pollen exine formation; GO:0080088,spermidine hydroxycinnamate co…	Transferase family	--	--	--
	Cluster-27241.44812	0	0	0	2.5	2.03	2.32	0.48	0	1.71	0	0	0	119.43	72.37	104.82	17.44	0	92.01	8.76893	3.67799e-13	4.30161e-12	up	8.15372	4.46408e-06	9.22992e-05	up	1.66006	0.177667	0.364546	false	NA	NA	NA	NA	2005	K13065 shikimate O-hydroxycinnamoyltransferase [EC:2.3.1.133] | (RefSeq) BAHDa2-2; BAHD family acyltransferase, clade I (A)	unknown [Picea sitchensis]	DCR_ARATH RecName: Full=BAHD acyltransferase DCR; EC=2.3.1.-; AltName: Full=Protein DEFECTIVE IN CUTICULAR RIDGES; AltName: Full=Protein PERMEABLE LEAVES 3;	B8LQ10_PICSI SubName: Full=Uncharacterized protein {ECO:0000313|EMBL:ABR17740.1};	--	GO:0005737,cytoplasm; GO:0005829,cytosol; GO:0016747,transferase activity, transferring acyl groups other than amino-acyl groups; GO:0010143,cutin biosynthetic process; GO:0051179,localization; GO:0090626,plant epidermis morphogenesis; GO:0010090,trichome morphogenesis; GO:0003674,molecular_function; GO:0003824,catalytic activity; GO:0016740,transferase activity; GO:0016746,transferase activity, …	Transferase family	--	--	--
	Cluster-27241.85997	0.45	0.33	0.72	1.45	1.04	1.15	1.66	1.22	1.5	25.51	11.15	24.3	75.28	40.04	56.55	66.13	61.36	87.83	1.22428	0.000944527	0.00317579	up	1.35768	1.76325e-05	0.000305086	up	-0.260012	0.38074	0.598678	false	1.48824	0.000508232	0.00263996	up	NA	NA	NA	NA	NA	NA	NA	NA	NA	NA	NA
	Cluster-27241.90421	0.04	0	0	1.24	1.03	1.07	0.3	0.52	0.12	2.1	0	0	61.34	37.87	49.83	11.25	25.03	6.85	5.99932	4.87465e-08	3.20829e-07	up	5.44656	5.29336e-05	0.000794434	up	1.82627	0.00252796	0.0113757	up	NA	NA	NA	NA	NA	NA	NA	NA	NA	NA	NA	NA	NA	NA	NA
	Cluster-27241.113587	1.68	0.99	1.22	0.31	0.15	0.13	0.14	0.14	0.2	63	22	27.23	10.6	3.72	4.36	3.79	4.71	7.6	-2.75525	6.03475e-07	3.43588e-06	down	-2.87465	1.11229e-09	5.32548e-08	down	NA	NA	NA	NA	-2.98674	4.10771e-07	3.79828e-06	down	NA	NA	NA	NA	NA	NA	NA	NA	NA	NA	NA
	Cluster-27241.46893	1.18	1.02	1.49	0.13	0	0	1.2	0.78	0.77	60.35	30.92	45.64	5.93	0	0	43.1	35.36	40.83	-4.80875	3.10555e-10	2.70355e-09	down	-1.43792	0.288414	0.496785	false	-4.36684	9.96772e-05	0.000617533	down	-0.503339	0.200853	0.363064	false	1967	K13065 shikimate O-hydroxycinnamoyltransferase [EC:2.3.1.133] | (RefSeq) BAHDa3-1; BAHD family acyltransferase, clade I (A)	unknown [Picea sitchensis]	HST_TOBAC RecName: Full=Shikimate O-hydroxycinnamoyltransferase; EC=2.3.1.133; AltName: Full=Hydroxycinnamoyl transferase; AltName: Full=Hydroxycinnamoyl-Coenzyme A shikimate/quinate hydroxycinnamoyltransferase;	B8LQ10_PICSI SubName: Full=Uncharacterized protein {ECO:0000313|EMBL:ABR17740.1};	--	GO:0047172,shikimate O-hydroxycinnamoyltransferase activity; GO:0003674,molecular_function; GO:0003824,catalytic activity; GO:0008374,O-acyltransferase activity; GO:0016740,transferase activity; GO:0016746,transferase activity, transferring acyl groups; GO:0016747,transferase activity, transferring acyl groups other than amino-acyl groups; GO:0050734,hydroxycinnamoyltransferase activity; GO:00507…	Transferase family	--	--	--
	Cluster-27241.53564	1.51	1.04	1.01	0	0	0	2.14	2.4	2.04	79	32.24	31.46	0	0	0	78.65	111.28	110.06	-8.17071	5.90249e-11	5.57381e-10	down	-0.16464	0.928137	0.964762	false	-8.99389	2.7595e-13	5.79511e-12	down	0.817786	0.00829628	0.0298909	false	2005	K13065 shikimate O-hydroxycinnamoyltransferase [EC:2.3.1.133] | (RefSeq) BAHDa2-2; BAHD family acyltransferase, clade I (A)	unknown [Picea sitchensis]	HST_TOBAC RecName: Full=Shikimate O-hydroxycinnamoyltransferase; EC=2.3.1.133; AltName: Full=Hydroxycinnamoyl transferase; AltName: Full=Hydroxycinnamoyl-Coenzyme A shikimate/quinate hydroxycinnamoyltransferase;	B8LQ10_PICSI SubName: Full=Uncharacterized protein {ECO:0000313|EMBL:ABR17740.1};	--	GO:0047172,shikimate O-hydroxycinnamoyltransferase activity; GO:0003674,molecular_function; GO:0003824,catalytic activity; GO:0008374,O-acyltransferase activity; GO:0016740,transferase activity; GO:0016746,transferase activity, transferring acyl groups; GO:0016747,transferase activity, transferring acyl groups other than amino-acyl groups; GO:0050734,hydroxycinnamoyltransferase activity; GO:00507…	Transferase family	--	--	--
