# Supplementary material for: Physiological and Transcriptomic Analysis Revealed the Molecular Mechanism of Pinus koraiensis Responses to Light
Source: Int J Mol Sci. 2022 Nov 6;23(21):13608. doi: 10.3390/ijms232113608 (PMC9653891; doi:10.3390/ijms232113608)
Supplement: Supplementary file 1 [file ijms-23-13608-s001.zip › Table S13 Spectrogram data of LED.xlsx]

## Sheet: Sheet1
Supplemental Table S13. Spectrogram data of LED
Intensity (counts)	Wavelength (nm)
195.05	7.04
195.32	7.04
195.58	7.04
195.85	18.58
196.12	17.74
196.39	17.82
196.66	19.93
196.93	19.53
197.19	18.47
197.46	19.02
197.73	18.6
198	18.09
198.27	19.13
198.53	18.88
198.8	18.2
199.07	19.85
199.34	18.16
199.61	19.15
199.87	20.38
200.14	20.21
200.41	20.27
200.68	18.2
200.95	19.45
201.22	17.47
201.48	20.52
201.75	18.01
202.02	20.79
202.29	19.44
202.56	17.17
202.82	17.62
203.09	19.74
203.36	20.06
203.63	17.57
203.9	20.89
204.16	17.95
204.43	19.73
204.7	18.91
204.97	20.81
205.24	21.65
205.5	19.54
205.77	21.4
206.04	19.1
206.31	19.72
206.58	19.97
206.84	19.04
207.11	20.09
207.38	17.68
207.65	21.59
207.92	19.24
208.18	18.39
208.45	20.55
208.72	17.71
208.99	19.35
209.25	20.26
209.52	18.33
209.79	19.27
210.06	18.44
210.33	18.22
210.59	18.9
210.86	18.52
211.13	18.26
211.4	19.01
211.67	20.23
211.93	17.75
212.2	20.22
212.47	17.36
212.74	17.04
213	18.71
213.27	17.35
213.54	19.06
213.81	19.86
214.08	18.88
214.34	18.42
214.61	18.93
214.88	19.66
215.15	21.56
215.41	19.54
215.68	19.42
215.95	20.23
216.22	18.97
216.49	16.86
216.75	17.65
217.02	18.92
217.29	19.59
217.56	18.83
217.82	16.85
218.09	20.21
218.36	18.7
218.63	18.4
218.89	19.74
219.16	18.32
219.43	18.65
219.7	18.81
219.97	19.22
220.23	19.9
220.5	20.18
220.77	18.18
221.04	17.87
221.3	18.93
221.57	19.14
221.84	16
222.11	18.37
222.37	18.62
222.64	19.55
222.91	20.67
223.18	19.29
223.44	17.57
223.71	17.67
223.98	20.74
224.25	20.86
224.51	17.14
224.78	19.66
225.05	16.95
225.32	18.7
225.58	22.27
225.85	18.35
226.12	21.57
226.39	19.35
226.65	17.7
226.92	19.36
227.19	19.9
227.46	20.13
227.72	18.38
227.99	19.25
228.26	19.64
228.53	20.7
228.79	19.06
229.06	18.95
229.33	18.93
229.6	20.1
229.86	18.89
230.13	19.39
230.4	17.87
230.67	17.05
230.93	16.49
231.2	18.18
231.47	18.79
231.74	19.24
232	20.82
232.27	17.59
232.54	19.2
232.81	21.05
233.07	18.4
233.34	20.25
233.61	19.69
233.88	18.36
234.14	17.94
234.41	15.94
234.68	19.44
234.94	18.41
235.21	18.44
235.48	18.31
235.75	17.95
236.01	20.64
236.28	18.35
236.55	20.48
236.82	20.77
237.08	19.47
237.35	20.16
237.62	18.82
237.88	19.65
238.15	18.57
238.42	18.02
238.69	19.68
238.95	19
239.22	18.62
239.49	20.15
239.75	19.14
240.02	18.84
240.29	21.25
240.56	16.98
240.82	18.54
241.09	17.82
241.36	17.06
241.62	19.21
241.89	18.66
242.16	19.04
242.43	20.54
242.69	18.51
242.96	15.3
243.23	19.33
243.49	18.17
243.76	17.09
244.03	20.13
244.3	19.55
244.56	18.81
244.83	20.54
245.1	20.71
245.36	20.06
245.63	17.71
245.9	20.49
246.17	19.99
246.43	19.38
246.7	18.67
246.97	18
247.23	19.13
247.5	18.32
247.77	18.97
248.03	18.87
248.3	18.46
248.57	18.69
248.84	19.68
249.1	20.99
249.37	20
249.64	18.89
249.9	19.2
250.17	18.9
250.44	20.9
250.7	18.08
250.97	19.51
251.24	19.11
251.5	19.12
251.77	22.04
252.04	18.9
252.31	19.53
252.57	18.78
252.84	19.4
253.11	18.95
253.37	19.91
253.64	17.05
253.91	17.1
254.17	19.27
254.44	19.81
254.71	17.38
254.97	20.24
255.24	19.14
255.51	16.82
255.77	17.81
256.04	19.84
256.31	17.93
256.57	16.72
256.84	19.19
257.11	18.34
257.38	17.98
257.64	18.89
257.91	20.49
258.18	18.55
258.44	19.26
258.71	19.04
258.98	19.18
259.24	20.34
259.51	18.34
259.78	19.85
260.04	19.64
260.31	17.75
260.58	16.19
260.84	17.25
261.11	18.97
261.38	16.79
261.64	18.12
261.91	18.49
262.18	17.91
262.44	18.72
262.71	20.61
262.98	17.88
263.24	18.18
263.51	18.53
263.78	18.25
264.04	18.79
264.31	19.67
264.58	19.64
264.84	16.87
265.11	16.6
265.38	17.96
265.64	19.26
265.91	17.66
266.18	18.44
266.44	19.78
266.71	17.81
266.97	20.1
267.24	17.46
267.51	18.36
267.77	17.86
268.04	20.63
268.31	18.47
268.57	19.72
268.84	18.69
269.11	19.49
269.37	21.67
269.64	19.68
269.91	19.49
270.17	19.52
270.44	18.58
270.71	18.78
270.97	21.01
271.24	18.32
271.5	20.29
271.77	16.99
272.04	19.95
272.3	17.9
272.57	17.6
272.84	19.55
273.1	16.88
273.37	18.63
273.64	17.91
273.9	19.53
274.17	19.73
274.44	17.29
274.7	18.72
274.97	17.03
275.23	18.04
275.5	18.94
275.77	18.05
276.03	16.71
276.3	16.2
276.57	18.08
276.83	19.15
277.1	19.18
277.36	18.77
277.63	19.77
277.9	20.11
278.16	18.81
278.43	17.72
278.7	16.99
278.96	19.24
279.23	17.63
279.49	19.66
279.76	17.4
280.03	15.86
280.29	18.78
280.56	18.69
280.83	16.84
281.09	18.58
281.36	18.62
281.62	18.56
281.89	18.57
282.16	18.25
282.42	19.88
282.69	18.91
282.96	18.69
283.22	21.78
283.49	18.74
283.75	18.49
284.02	17.04
284.29	17.93
284.55	16.93
284.82	18.91
285.08	17.84
285.35	18.95
285.62	21.26
285.88	18.89
286.15	17.95
286.41	19.44
286.68	16.98
286.95	18.26
287.21	17.81
287.48	19.72
287.74	21.81
288.01	19.65
288.28	18.6
288.54	19.82
288.81	18.05
289.07	20.41
289.34	17.97
289.61	16.34
289.87	17.7
290.14	17.4
290.4	20.14
290.67	19.92
290.94	18.09
291.2	18.66
291.47	16.49
291.73	21.45
292	19.7
292.27	18.19
292.53	18.27
292.8	17.53
293.06	18.96
293.33	19.57
293.6	20.11
293.86	19.79
294.13	17.3
294.39	19.15
294.66	20.18
294.93	18.26
295.19	18.51
295.46	17.61
295.72	18.98
295.99	19.49
296.25	17.54
296.52	18.49
296.79	21.09
297.05	18.34
297.32	18.37
297.58	20.97
297.85	20.66
298.11	17.6
298.38	17.13
298.65	17.93
298.91	17.09
299.18	19.16
299.44	15.47
299.71	17.99
299.98	18.26
300.24	18.09
300.51	19.87
300.77	17.66
301.04	20.42
301.3	19.25
301.57	17.03
301.84	18.75
302.1	19.51
302.37	17.59
302.63	19.48
302.9	19.26
303.16	20.44
303.43	19.22
303.69	16.94
303.96	17.44
304.23	18.38
304.49	18.21
304.76	18.73
305.02	20.49
305.29	19.85
305.55	18.55
305.82	19
306.08	17.68
306.35	18.43
306.62	19.76
306.88	18.44
307.15	19.06
307.41	15.95
307.68	17.96
307.94	19.38
308.21	20.23
308.47	19.61
308.74	22.24
309.01	19.39
309.27	19.69
309.54	16.4
309.8	18.57
310.07	19.26
310.33	20.34
310.6	19.45
310.86	20.41
311.13	18.73
311.39	18.95
311.66	19.95
311.93	20.3
312.19	21.83
312.46	19.17
312.72	20.94
312.99	18.9
313.25	20
313.52	18.28
313.78	19.47
314.05	18.99
314.31	19.54
314.58	17.71
314.85	16.6
315.11	17.18
315.38	17.53
315.64	20.33
315.91	20.79
316.17	19.6
316.44	17.31
316.7	17.5
316.97	18.87
317.23	17.59
317.5	20.53
317.76	18.4
318.03	20.47
318.29	19.66
318.56	20.66
318.82	19.13
319.09	19.21
319.35	18.73
319.62	19.49
319.89	17.9
320.15	17.26
320.42	18.85
320.68	19.36
320.95	19.02
321.21	20.94
321.48	21.21
321.74	18.84
322.01	18.94
322.27	20.71
322.54	19.68
322.8	18.01
323.07	19.22
323.33	19.14
323.6	19.36
323.86	19.42
324.13	19.87
324.39	18.99
324.66	17.17
324.92	19.96
325.19	18.85
325.45	19.42
325.72	18.73
325.98	18.82
326.25	20.21
326.51	21.63
326.78	21.51
327.04	20.06
327.31	17.38
327.57	20.36
327.84	18.27
328.1	19.17
328.37	19.97
328.63	19.13
328.9	18.89
329.16	17.87
329.43	20.67
329.69	18
329.96	18.72
330.22	18.3
330.49	20.3
330.75	20.87
331.02	19.11
331.28	18.05
331.55	20.3
331.81	18.69
332.08	18.36
332.34	17.33
332.61	15.26
332.87	18.6
333.14	19.29
333.4	20.74
333.67	18.91
333.93	20.36
334.2	20.19
334.46	19.54
334.73	19.01
334.99	18.8
335.26	20.79
335.52	20.12
335.79	17.7
336.05	18.37
336.32	19.85
336.58	19.62
336.85	18.5
337.11	19.21
337.37	17.79
337.64	18.28
337.9	19.35
338.17	18.54
338.43	18.9
338.7	19.38
338.96	19.07
339.23	18.78
339.49	19.09
339.76	18.33
340.02	20.34
340.29	18.39
340.55	19.44
340.82	17.76
341.08	20.16
341.35	19.32
341.61	21.62
341.87	19.21
342.14	19.87
342.4	20.48
342.67	18.38
342.93	20.55
343.2	18.93
343.46	20.21
343.73	17.77
343.99	17.96
344.26	18.65
344.52	17.97
344.79	17.99
345.05	20.4
345.31	19.09
345.58	20.77
345.84	19.93
346.11	17.36
346.37	17.8
346.64	19.92
346.9	19.99
347.17	21.06
347.43	18.47
347.7	20.85
347.96	19.66
348.22	18.93
348.49	22.01
348.75	18.8
349.02	21.23
349.28	18.86
349.55	19.46
349.81	19.95
350.08	17.59
350.34	17.95
350.6	20.03
350.87	18.49
351.13	20.14
351.4	20.44
351.66	18.11
351.93	19.45
352.19	17.84
352.46	18.02
352.72	18.93
352.98	19.31
353.25	19.1
353.51	20.18
353.78	17.65
354.04	18.24
354.31	18.23
354.57	19.21
354.83	18.82
355.1	18.17
355.36	16.78
355.63	20.53
355.89	18.86
356.16	17.05
356.42	18.84
356.68	19.46
356.95	18.63
357.21	19.54
357.48	20.79
357.74	19.56
358.01	20.72
358.27	18.64
358.53	19.83
358.8	16.77
359.06	17.92
359.33	19.35
359.59	18.44
359.85	18.84
360.12	19.57
360.38	19.71
360.65	19.56
360.91	19.88
361.18	19.97
361.44	20.61
361.7	18.46
361.97	20.32
362.23	20.03
362.5	19.59
362.76	19.22
363.02	18.62
363.29	19.7
363.55	19.91
363.82	20.74
364.08	17.77
364.34	20.23
364.61	19.35
364.87	18.82
365.14	20.21
365.4	20.27
365.66	17.65
365.93	18.79
366.19	18.57
366.46	21.21
366.72	21.07
366.98	21.08
367.25	20.36
367.51	18.79
367.78	18.9
368.04	16.53
368.3	17.91
368.57	19.38
368.83	17.42
369.1	18.02
369.36	18.65
369.62	18.17
369.89	18
370.15	18.36
370.42	18.87
370.68	19.94
370.94	20.42
371.21	19.45
371.47	15.98
371.74	19.61
372	20.35
372.26	21.11
372.53	17.92
372.79	20.16
373.05	19.87
373.32	21.2
373.58	19.31
373.85	18.24
374.11	19.77
374.37	19.17
374.64	18.52
374.9	18.26
375.16	19.39
375.43	19.75
375.69	20
375.96	18.54
376.22	17.22
376.48	20.06
376.75	20.56
377.01	19.74
377.27	21.93
377.54	19.09
377.8	18.83
378.07	18.57
378.33	18.49
378.59	17.32
378.86	18.44
379.12	16.16
379.38	19.18
379.65	19.49
379.91	18.9
380.18	18.95
380.44	19.64
380.7	19.85
380.97	19.64
381.23	18.8
381.49	17.82
381.76	18.3
382.02	18.86
382.28	19.72
382.55	19.01
382.81	18.29
383.07	18.55
383.34	21.43
383.6	16.81
383.87	20.4
384.13	17.36
384.39	18.49
384.66	18.96
384.92	19.75
385.18	19.12
385.45	19.04
385.71	19.42
385.97	17.96
386.24	18.23
386.5	21.74
386.76	21.77
387.03	18.49
387.29	18.41
387.55	18.85
387.82	19.13
388.08	18.77
388.34	18.91
388.61	19.83
388.87	20.08
389.13	19.49
389.4	18.82
389.66	19.88
389.92	20.69
390.19	16.87
390.45	18.56
390.71	18.32
390.98	17.79
391.24	19.31
391.5	19.46
391.77	19.88
392.03	19.4
392.29	17.54
392.56	19.07
392.82	20.94
393.08	20.25
393.35	18.68
393.61	19.42
393.87	19.56
394.14	20.54
394.4	19.35
394.66	20.82
394.93	19.18
395.19	18.3
395.45	18.81
395.72	17.98
395.98	19.25
396.24	18.51
396.51	21.04
396.77	19.36
397.03	18.65
397.3	18.43
397.56	18.04
397.82	18.48
398.08	19.9
398.35	19.62
398.61	18.72
398.87	20.85
399.14	18.81
399.4	20.26
399.66	17.8
399.93	18.92
400.19	19.95
400.45	18.03
400.72	17.86
400.98	18.87
401.24	17.31
401.5	19.67
401.77	18.55
402.03	19.91
402.29	20.23
402.56	18.63
402.82	17.27
403.08	17.85
403.35	19.04
403.61	19.04
403.87	21.4
404.14	19.39
404.4	19.06
404.66	18.52
404.92	22.01
405.19	20.84
405.45	19.52
405.71	19.54
405.98	17.08
406.24	19.79
406.5	20.87
406.76	19.51
407.03	20.59
407.29	19.38
407.55	22.52
407.82	17.6
408.08	20.72
408.34	21.65
408.6	20.23
408.87	20.66
409.13	19.92
409.39	20.83
409.66	20.3
409.92	19.34
410.18	20.46
410.44	21.87
410.71	20.58
410.97	21.6
411.23	20.42
411.5	19.02
411.76	23.42
412.02	21.25
412.28	21.81
412.55	21.37
412.81	22.63
413.07	22.57
413.33	23
413.6	23.63
413.86	23.25
414.12	23.35
414.39	23.95
414.65	23.36
414.91	23.73
415.17	21.42
415.44	22.55
415.7	24.13
415.96	23.56
416.22	23.09
416.49	25.18
416.75	25.2
417.01	26.14
417.27	26.41
417.54	26.1
417.8	29.15
418.06	27.61
418.32	27.85
418.59	27.28
418.85	26.44
419.11	27.85
419.37	28.39
419.64	29.19
419.9	28.11
420.16	29.21
420.42	28.76
420.69	30.6
420.95	30.45
421.21	31.09
421.47	31.85
421.74	33.1
422	32.17
422.26	33.44
422.52	32.49
422.79	31.92
423.05	35.2
423.31	34.02
423.57	35.42
423.84	36.67
424.1	36.85
424.36	40.18
424.62	39.45
424.89	38.62
425.15	38.4
425.41	40.85
425.67	40.15
425.94	43.26
426.2	41.17
426.46	43.66
426.72	44
426.99	44.43
427.25	47.14
427.51	46.89
427.77	46.21
428.03	48.91
428.3	48.83
428.56	45.49
428.82	51.27
429.08	51.81
429.35	53.98
429.61	55.74
429.87	55.46
430.13	56.95
430.39	55.28
430.66	58.97
430.92	60.99
431.18	61.49
431.44	63.27
431.71	62.12
431.97	61.88
432.23	65.38
432.49	66.66
432.75	69.58
433.02	69.62
433.28	73.82
433.54	75.24
433.8	75.72
434.07	74.69
434.33	76.7
434.59	81.07
434.85	85.57
435.11	83.63
435.38	83.83
435.64	85.63
435.9	89.61
436.16	92.23
436.42	94.28
436.69	93.72
436.95	96.43
437.21	98.8
437.47	100.17
437.73	102.62
438	105.08
438.26	108.86
438.52	112.07
438.78	112.96
439.04	114.63
439.31	115.69
439.57	118.1
439.83	126.3
440.09	125.3
440.35	129.45
440.62	127.52
440.88	132.89
441.14	140
441.4	141.57
441.66	143.67
441.93	142.21
442.19	150.39
442.45	153.12
442.71	154.29
442.97	158.42
443.23	163.8
443.5	163.56
443.76	167.59
444.02	174.8
444.28	177.06
444.54	177
444.81	184.56
445.07	190.35
445.33	194.35
445.59	198.11
445.85	203.52
446.11	197.91
446.38	206.74
446.64	210.03
446.9	210.49
447.16	215.69
447.42	218.9
447.69	223.31
447.95	226.94
448.21	227.14
448.47	225.81
448.73	233.08
448.99	231.47
449.26	237.08
449.52	231.07
449.78	242.36
450.04	241.35
450.3	242.74
450.56	246.81
450.83	246.58
451.09	249.8
451.35	246.25
451.61	244.85
451.87	241.69
452.13	246.59
452.4	242.38
452.66	243.95
452.92	248.3
453.18	237.62
453.44	244.71
453.7	240.65
453.96	239.92
454.23	237.74
454.49	239.92
454.75	232.57
455.01	228.12
455.27	227.97
455.53	221.85
455.8	221.83
456.06	219.26
456.32	211.29
456.58	212.65
456.84	211.51
457.1	206.04
457.36	204.15
457.63	200.61
457.89	197.68
458.15	192.22
458.41	193
458.67	191.96
458.93	187.29
459.19	183.29
459.46	182.49
459.72	181.79
459.98	176.01
460.24	170.41
460.5	168.7
460.76	171.77
461.02	165.27
461.28	162.4
461.55	162.68
461.81	160.04
462.07	163.1
462.33	157.38
462.59	155.42
462.85	154.91
463.11	153.87
463.38	155.15
463.64	148.7
463.9	149.66
464.16	146.03
464.42	146.22
464.68	142.67
464.94	141.96
465.2	144.75
465.46	146.41
465.73	143.85
465.99	138.71
466.25	142.74
466.51	137.73
466.77	137.44
467.03	136.01
467.29	131.02
467.55	134.57
467.82	131.3
468.08	131.25
468.34	130.36
468.6	131.39
468.86	130.41
469.12	131.01
469.38	127.17
469.64	129.33
469.9	127.79
470.17	127.03
470.43	126.1
470.69	124.88
470.95	122.26
471.21	123.99
471.47	122.8
471.73	122.4
471.99	120.16
472.25	117.82
472.51	116.99
472.78	116.29
473.04	116.79
473.3	112.75
473.56	111.37
473.82	113.85
474.08	110.71
474.34	111.37
474.6	112.82
474.86	111.43
475.12	112.82
475.39	109.81
475.65	110.2
475.91	108.48
476.17	107.81
476.43	106.55
476.69	109.06
476.95	106.26
477.21	106.13
477.47	108.77
477.73	109.51
477.99	106.69
478.25	107.19
478.52	109.54
478.78	106.52
479.04	109.8
479.3	105.2
479.56	106.81
479.82	107.47
480.08	107.38
480.34	106.75
480.6	106.48
480.86	111.8
481.12	109.12
481.38	109.61
481.64	109.97
481.91	109.58
482.17	111.63
482.43	112.04
482.69	109.99
482.95	113.15
483.21	114.26
483.47	113.69
483.73	113.52
483.99	115.42
484.25	116.64
484.51	115.81
484.77	116.85
485.03	119.17
485.29	120.39
485.55	119.24
485.82	123.93
486.08	121.23
486.34	120.14
486.6	123.01
486.86	123.14
487.12	124.11
487.38	126.47
487.64	125.93
487.9	124.05
488.16	125.69
488.42	127.39
488.68	127.23
488.94	129.63
489.2	129.74
489.46	133.48
489.72	131.79
489.98	133.85
490.24	135.11
490.51	131.62
490.77	137.28
491.03	139.14
491.29	139.13
491.55	140.79
491.81	139.81
492.07	139.62
492.33	142.78
492.59	141.91
492.85	143.92
493.11	144.74
493.37	145.66
493.63	145.67
493.89	147.12
494.15	147.68
494.41	148.31
494.67	148.83
494.93	151.49
495.19	151.44
495.45	153.88
495.71	158.22
495.97	155.86
496.23	159.42
496.49	159.52
496.75	160.5
497.01	159.59
497.27	161.95
497.53	163.45
497.79	165.17
498.06	164
498.32	168.22
498.58	168.54
498.84	170.36
499.1	171.56
499.36	170.84
499.62	171.48
499.88	173.39
500.14	173.4
500.4	177.44
500.66	176.04
500.92	177.01
501.18	178.51
501.44	180.54
501.7	181.36
501.96	182.35
502.22	181.07
502.48	183.65
502.74	185.13
503	185.85
503.26	188.14
503.52	188.94
503.78	187.74
504.04	189.69
504.3	189.45
504.56	193.81
504.82	193.22
505.08	193.52
505.34	194.65
505.6	194.07
505.86	197.92
506.12	199.3
506.38	199.59
506.64	201.37
506.9	197.77
507.16	199.51
507.42	203.66
507.68	201.2
507.94	203.41
508.2	202.8
508.46	202.26
508.72	206.77
508.98	205.04
509.24	208.72
509.5	208.85
509.76	208.57
510.02	207.52
510.28	208.92
510.54	209.91
510.8	209.86
511.06	210.06
511.32	210.07
511.58	212.22
511.84	212.05
512.1	211.84
512.36	214.05
512.62	210.92
512.88	217.88
513.14	216.15
513.39	218.59
513.65	217.34
513.91	218.38
514.17	216.59
514.43	219.24
514.69	220.22
514.95	220.1
515.21	223.12
515.47	222.53
515.73	225.8
515.99	220.6
516.25	222.7
516.51	223.95
516.77	223.23
517.03	225.35
517.29	225.62
517.55	225.04
517.81	227.2
518.07	228
518.33	228.08
518.59	228.91
518.85	227.11
519.11	230.74
519.37	229.37
519.63	229.82
519.89	232.58
520.15	231.62
520.41	231.64
520.67	232.65
520.92	232.12
521.18	233.19
521.44	235.91
521.7	231.74
521.96	236.01
522.22	235.17
522.48	236.55
522.74	236.89
523	237.61
523.26	234.71
523.52	236.55
523.78	235.08
524.04	237.39
524.3	237.96
524.56	238.75
524.82	240.78
525.08	242.78
525.34	241.68
525.59	241.89
525.85	240.12
526.11	240.64
526.37	237.27
526.63	239.94
526.89	240.3
527.15	239.23
527.41	242.07
527.67	239.04
527.93	241.43
528.19	243.65
528.45	242.88
528.71	243.25
528.97	241.57
529.23	241.48
529.48	244.67
529.74	245.38
530	243.42
530.26	243.07
530.52	243.7
530.78	243.08
531.04	242.05
531.3	245.62
531.56	242.83
531.82	247.36
532.08	244.72
532.34	246.33
532.6	244.86
532.85	245.84
533.11	247.74
533.37	244.41
533.63	245.2
533.89	245.18
534.15	246.77
534.41	245.71
534.67	246.37
534.93	244.73
535.19	246.79
535.45	246.86
535.7	250.01
535.96	247.89
536.22	248.26
536.48	246.85
536.74	248.08
537	247.44
537.26	247.78
537.52	248.32
537.78	247.96
538.04	247.56
538.29	250.15
538.55	249.99
538.81	248.97
539.07	250.74
539.33	247.29
539.59	248.54
539.85	248.26
540.11	252.08
540.37	250.16
540.63	250.39
540.88	250.57
541.14	248.49
541.4	249.61
541.66	252.67
541.92	252.13
542.18	250.9
542.44	251.65
542.7	251.59
542.96	253.37
543.21	251.73
543.47	250.68
543.73	253.66
543.99	253.54
544.25	253.61
544.51	251.57
544.77	253.27
545.03	252.9
545.28	253.3
545.54	251.82
545.8	250.82
546.06	254.13
546.32	250.83
546.58	253.83
546.84	250.79
547.1	252.96
547.35	251.73
547.61	254.69
547.87	251.27
548.13	253.4
548.39	251.79
548.65	254.16
548.91	252.24
549.17	252.77
549.42	254.74
549.68	255.18
549.94	253.35
550.2	252.58
550.46	252.12
550.72	251.55
550.98	253.06
551.23	250.95
551.49	252.2
551.75	254.2
552.01	254.72
552.27	251.83
552.53	251.45
552.79	253.06
553.04	250.52
553.3	253.76
553.56	251.64
553.82	253.78
554.08	254.78
554.34	254.47
554.59	253.51
554.85	252.63
555.11	253.28
555.37	254.24
555.63	255.67
555.89	253.35
556.15	254.25
556.4	253.42
556.66	254.38
556.92	255.02
557.18	255.09
557.44	255.51
557.7	253.52
557.95	253.18
558.21	251.22
558.47	252.07
558.73	252.26
558.99	253.25
559.25	252.82
559.5	252.68
559.76	253.33
560.02	255.45
560.28	254.81
560.54	252.04
560.8	255.74
561.05	253.61
561.31	254.24
561.57	252.86
561.83	252.36
562.09	252.57
562.35	253.45
562.6	255.17
562.86	256.13
563.12	251.33
563.38	253.78
563.64	251.97
563.89	251.38
564.15	253.12
564.41	255.6
564.67	251.91
564.93	250.73
565.18	252.46
565.44	254.23
565.7	253.65
565.96	254.48
566.22	252.98
566.48	250.57
566.73	255.41
566.99	252.55
567.25	254.35
567.51	253.42
567.77	254.93
568.02	248.66
568.28	252.59
568.54	251.06
568.8	249.19
569.06	251.15
569.31	252.69
569.57	254.8
569.83	251.29
570.09	251.98
570.35	252.79
570.6	252.28
570.86	253.87
571.12	250.7
571.38	253.12
571.64	250.94
571.89	253.35
572.15	249.49
572.41	250.17
572.67	250.26
572.92	247.51
573.18	250.05
573.44	250.69
573.7	248.91
573.96	247.68
574.21	250.37
574.47	249.65
574.73	248.96
574.99	247.86
575.25	244.03
575.5	247.31
575.76	249.1
576.02	245.39
576.28	248.67
576.53	247.24
576.79	245.62
577.05	248.33
577.31	246.17
577.57	244.27
577.82	245.9
578.08	244.22
578.34	244.99
578.6	245.59
578.85	245.17
579.11	244.44
579.37	245.49
579.63	242.53
579.88	242.7
580.14	241.15
580.4	243.15
580.66	242.23
580.92	240.94
581.17	241.17
581.43	238.99
581.69	239.92
581.95	240.69
582.2	240.02
582.46	240.33
582.72	238.19
582.98	238.33
583.23	238.94
583.49	238.07
583.75	237.42
584.01	239.79
584.26	236.14
584.52	235.62
584.78	236.34
585.04	235.02
585.29	233.21
585.55	236.21
585.81	234.45
586.07	233.57
586.32	233.22
586.58	231.73
586.84	236.27
587.1	231.61
587.35	232.94
587.61	228.45
587.87	229.9
588.13	229.87
588.38	227.85
588.64	228.53
588.9	225.8
589.15	228.62
589.41	227.44
589.67	228.28
589.93	226.07
590.18	225.41
590.44	224.16
590.7	225.87
590.96	226.61
591.21	223.33
591.47	223.55
591.73	223.64
591.98	223.56
592.24	223.09
592.5	221.14
592.76	220.31
593.01	222.19
593.27	219.44
593.53	218.18
593.79	222.83
594.04	217.86
594.3	220.6
594.56	220.08
594.81	215.93
595.07	215.82
595.33	215.24
595.59	215.28
595.84	213.1
596.1	212.51
596.36	213.19
596.61	213.04
596.87	210.04
597.13	213.46
597.39	214.24
597.64	210.24
597.9	208.06
598.16	208.37
598.41	210.29
598.67	207.65
598.93	209.04
599.18	206.14
599.44	203.33
599.7	203.85
599.96	204.68
600.21	202.96
600.47	201.05
600.73	202.03
600.98	200.59
601.24	200.68
601.5	199.71
601.75	200.06
602.01	201.27
602.27	198.09
602.52	197.55
602.78	196.35
603.04	197.86
603.3	197.51
603.55	195.93
603.81	193.72
604.07	193.22
604.32	191.94
604.58	191.62
604.84	191.12
605.09	192.6
605.35	190.91
605.61	189.32
605.86	188.21
606.12	191.11
606.38	189.03
606.63	188.88
606.89	186.89
607.15	185.78
607.4	185.33
607.66	184.67
607.92	184.65
608.17	183.77
608.43	181.81
608.69	181.29
608.94	180.66
609.2	178.88
609.46	177.41
609.71	179.34
609.97	178.16
610.23	179.26
610.48	176.47
610.74	175.62
611	173.82
611.25	173.71
611.51	176.21
611.77	175.05
612.02	175.91
612.28	171.79
612.54	171.64
612.79	171.28
613.05	169.85
613.31	168.2
613.56	168.59
613.82	169.04
614.08	167.67
614.33	168.06
614.59	165.23
614.85	165.35
615.1	165.53
615.36	164.19
615.62	164.05
615.87	163.31
616.13	162.66
616.38	160.54
616.64	160.42
616.9	158.21
617.15	159.45
617.41	157.11
617.67	159.01
617.92	157.95
618.18	155.31
618.44	155.17
618.69	156.51
618.95	154.73
619.21	150.94
619.46	154.15
619.72	151.23
619.97	152.18
620.23	152.89
620.49	150.85
620.74	151.32
621	147.68
621.26	148.98
621.51	146.15
621.77	147.94
622.02	145.79
622.28	146.15
622.54	146.19
622.79	146.7
623.05	142.03
623.31	144.25
623.56	144.04
623.82	139.24
624.07	139.9
624.33	142.27
624.59	138.97
624.84	139.48
625.1	137.97
625.35	140.14
625.61	136.29
625.87	137.9
626.12	137.73
626.38	135.22
626.64	132.8
626.89	131.85
627.15	131.43
627.4	132.04
627.66	130.76
627.92	130.02
628.17	129.77
628.43	131.5
628.68	129.88
628.94	127.79
629.2	126.15
629.45	124.88
629.71	125.28
629.96	125.36
630.22	125.32
630.48	125.57
630.73	123.25
630.99	122.22
631.24	122.36
631.5	121.34
631.76	120.08
632.01	118.95
632.27	121.24
632.52	116.26
632.78	117.97
633.03	116.36
633.29	118.87
633.55	115.15
633.8	112.66
634.06	113.72
634.31	113.94
634.57	115.07
634.83	112.52
635.08	110.98
635.34	113.06
635.59	112.76
635.85	109.55
636.1	108.53
636.36	109.91
636.62	106.51
636.87	108.09
637.13	108.3
637.38	106.65
637.64	106.98
637.89	105.05
638.15	106.38
638.41	105.29
638.66	101.09
638.92	101.79
639.17	100.88
639.43	101.1
639.68	99.19
639.94	98.77
640.2	98.47
640.45	97.83
640.71	98.14
640.96	98.44
641.22	99.24
641.47	97.29
641.73	94.35
641.98	96.42
642.24	94.71
642.5	94.69
642.75	91.88
643.01	91.31
643.26	93.04
643.52	91.41
643.77	91.86
644.03	89.72
644.28	90.34
644.54	90.22
644.8	89.41
645.05	87.95
645.31	89.66
645.56	88.47
645.82	89.23
646.07	86.96
646.33	87.37
646.58	85.84
646.84	83.87
647.09	86.77
647.35	84.54
647.61	84.88
647.86	82.24
648.12	84.39
648.37	82.38
648.63	81.51
648.88	79.53
649.14	80.44
649.39	80.74
649.65	80.81
649.9	78.66
650.16	79.38
650.41	80.97
650.67	77.9
650.92	77.4
651.18	76.69
651.43	75.73
651.69	75
651.94	73.96
652.2	74.13
652.46	73.71
652.71	74.03
652.97	73.24
653.22	73.92
653.48	72.28
653.73	74.6
653.99	71.65
654.24	70.86
654.5	72.01
654.75	72.59
655.01	70.13
655.26	69.18
655.52	71.01
655.77	71.13
656.03	70.78
656.28	69.65
656.54	68.19
656.79	67.96
657.05	67.17
657.3	65.7
657.56	67.68
657.81	68.35
658.07	67.28
658.32	66.48
658.58	67.24
658.83	66.13
659.09	62.21
659.34	62.09
659.6	62.62
659.85	64.8
660.11	62.84
660.36	60.88
660.62	60.92
660.87	61.29
661.13	60.42
661.38	63.56
661.64	62.99
661.89	61.17
662.15	61.36
662.4	59.67
662.66	60.24
662.91	58.44
663.17	58.98
663.42	60.16
663.68	60.33
663.93	58.21
664.18	56.5
664.44	59.77
664.69	59.12
664.95	57.39
665.2	56.76
665.46	56.59
665.71	55.29
665.97	55.97
666.22	56.57
666.48	56.09
666.73	52.59
666.99	54.7
667.24	54.57
667.5	56.2
667.75	54.23
668.01	51.98
668.26	51.64
668.52	52.85
668.77	50.88
669.02	53.83
669.28	55.96
669.53	53.36
669.79	51.98
670.04	51.45
670.3	50.82
670.55	51.18
670.81	51.14
671.06	51.95
671.32	48.29
671.57	49.09
671.82	51.3
672.08	49.57
672.33	48.66
672.59	48.99
672.84	48.31
673.1	47.76
673.35	46.14
673.61	48.06
673.86	46.18
674.11	44.73
674.37	47.18
674.62	44.94
674.88	44.84
675.13	46.56
675.39	46.27
675.64	45.79
675.9	45.62
676.15	47.85
676.4	46.92
676.66	44.08
676.91	44.21
677.17	42.87
677.42	46.64
677.68	43.99
677.93	41.47
678.18	43.63
678.44	44.85
678.69	43.31
678.95	43.37
679.2	43.9
679.46	42.87
679.71	42.45
679.96	43.69
680.22	42.51
680.47	40.43
680.73	42.13
680.98	43.16
681.24	42.65
681.49	41.3
681.74	40.77
682	41.21
682.25	41.45
682.51	41.14
682.76	39.34
683.01	40.93
683.27	39.18
683.52	38.68
683.78	39.32
684.03	38.71
684.28	38.49
684.54	38.79
684.79	38.2
685.05	38.91
685.3	38.08
685.56	37.01
685.81	37.24
686.06	36.71
686.32	37.68
686.57	37.72
686.83	38.46
687.08	36.4
687.33	36.81
687.59	37.41
687.84	36.92
688.09	36.46
688.35	37.64
688.6	33.46
688.86	36.91
689.11	36.19
689.36	34.81
689.62	37.41
689.87	34.75
690.13	35.02
690.38	37.13
690.63	37
690.89	34.59
691.14	34.4
691.4	35.11
691.65	33.44
691.9	36.08
692.16	33.64
692.41	34.35
692.66	33.45
692.92	32.6
693.17	34.44
693.43	33.69
693.68	33.96
693.93	30.48
694.19	32.16
694.44	34.13
694.69	32.67
694.95	30.97
695.2	33.19
695.46	30.58
695.71	30.64
695.96	32.33
696.22	34.65
696.47	30.06
696.72	31.99
696.98	31.73
697.23	31.7
697.48	33.8
697.74	31.62
697.99	33.43
698.25	31.76
698.5	31.99
698.75	31.34
699.01	29.9
699.26	29.91
699.51	30.55
699.77	29.4
700.02	29.88
700.27	31.41
700.53	30.01
700.78	33.18
701.03	30.94
701.29	27.98
701.54	31.41
701.79	30.24
702.05	29.9
702.3	31.06
702.55	29.34
702.81	27.37
703.06	29.4
703.31	28.96
703.57	28.67
703.82	28.41
704.07	28.84
704.33	27.55
704.58	29.84
704.83	27.81
705.09	28.93
705.34	30.85
705.59	29.29
705.85	27.94
706.1	28.43
706.35	28.09
706.61	27.23
706.86	29.01
707.11	27.03
707.37	29.23
707.62	25.8
707.87	27.81
708.13	27.86
708.38	28.76
708.63	28.66
708.89	29.53
709.14	27.89
709.39	25.98
709.65	26.33
709.9	26.11
710.15	26.35
710.41	26.96
710.66	26.62
710.91	27.54
711.17	26.95
711.42	26.56
711.67	25.13
711.92	28.69
712.18	27.55
712.43	24.88
712.68	27.35
712.94	26.9
713.19	27.51
713.44	24.57
713.7	25.32
713.95	25.83
714.2	27.51
714.45	26.33
714.71	25.49
714.96	25.59
715.21	25.49
715.47	25.74
715.72	26.12
715.97	26.15
716.23	27.03
716.48	25.2
[truncated: 1,650 more rows]
