# Supplementary material for: Physiological and Transcriptomic Analysis Revealed the Molecular Mechanism of Pinus koraiensis Responses to Light
Source: Int J Mol Sci. 2022 Nov 6;23(21):13608. doi: 10.3390/ijms232113608 (PMC9653891; doi:10.3390/ijms232113608)
Supplement: Supplementary file 1 [file ijms-23-13608-s001.zip › Table S14 Spectrogram data of incandescent lamp.xlsx]

## Sheet: Sheet1
Supplemental Table S14. Spectrogram data of incandescent lamp
Intensity (counts)	Wavelength (nm)
195.05	0
195.32	0
195.58	0
195.85	2.06
196.12	3.64
196.39	0.91
196.66	1.92
196.93	3.32
197.19	1.73
197.46	1.9
197.73	1.35
198	2.34
198.27	0.8
198.53	0.26
198.8	0
199.07	2.74
199.34	2.48
199.61	2.94
199.87	4.91
200.14	5.09
200.41	3.61
200.68	2.33
200.95	1.6
201.22	1.82
201.48	3.05
201.75	1.89
202.02	3.46
202.29	2.45
202.56	3.38
202.82	2.44
203.09	2.92
203.36	3.52
203.63	2.66
203.9	5.31
204.16	1.08
204.43	4.97
204.7	2.65
204.97	4.22
205.24	5.41
205.5	4.73
205.77	4.97
206.04	3.2
206.31	5.29
206.58	3.3
206.84	4.59
207.11	4.95
207.38	2.58
207.65	3.71
207.92	1.18
208.18	1.1
208.45	5.22
208.72	2.34
208.99	3.78
209.25	3.38
209.52	1.67
209.79	2.57
210.06	4.03
210.33	3.5
210.59	2.9
210.86	2.76
211.13	4.05
211.4	4.05
211.67	4.35
211.93	2.34
212.2	3.11
212.47	3.33
212.74	3.52
213	3.14
213.27	2.4
213.54	3.71
213.81	4.13
214.08	2.49
214.34	1.7
214.61	4.5
214.88	3.29
215.15	4.64
215.41	2.86
215.68	3.73
215.95	2.94
216.22	3.8
216.49	0.86
216.75	2.98
217.02	4.17
217.29	2.83
217.56	4.83
217.82	0.12
218.09	5.91
218.36	2.05
218.63	0.84
218.89	3.04
219.16	3.85
219.43	5.59
219.7	3.79
219.97	2.99
220.23	6.68
220.5	4.3
220.77	1.47
221.04	2.59
221.3	3.57
221.57	3.61
221.84	1.67
222.11	3
222.37	3.55
222.64	4.72
222.91	4.94
223.18	3.11
223.44	2.55
223.71	3.31
223.98	3.53
224.25	4.47
224.51	2.13
224.78	4.16
225.05	1.17
225.32	4.55
225.58	6.22
225.85	4.02
226.12	4.78
226.39	4.2
226.65	3.2
226.92	3.05
227.19	3.43
227.46	3.63
227.72	3.49
227.99	3.53
228.26	3.26
228.53	4
228.79	3.71
229.06	2.37
229.33	2.33
229.6	3.74
229.86	4.17
230.13	3.61
230.4	2.74
230.67	2.58
230.93	3.08
231.2	4.17
231.47	5.15
231.74	4.91
232	5.79
232.27	4.5
232.54	3.8
232.81	5.76
233.07	4.33
233.34	4.46
233.61	4.42
233.88	3.95
234.14	5.55
234.41	2.14
234.68	5.08
234.94	5.66
235.21	3.01
235.48	2.66
235.75	1.98
236.01	4.73
236.28	4.16
236.55	5.64
236.82	4.39
237.08	4.44
237.35	5.2
237.62	3.71
237.88	4.24
238.15	2.05
238.42	4.2
238.69	2.19
238.95	3.95
239.22	2.93
239.49	2.87
239.75	5.1
240.02	4.1
240.29	4.55
240.56	1.9
240.82	3.37
241.09	3.74
241.36	1.66
241.62	4.36
241.89	2.07
242.16	2.28
242.43	3.75
242.69	3.3
242.96	1.19
243.23	3.26
243.49	4.36
243.76	1.87
244.03	4.98
244.3	5.58
244.56	3.66
244.83	5.78
245.1	5.37
245.36	6.16
245.63	4.04
245.9	3.76
246.17	3.41
246.43	4
246.7	4.57
246.97	4.44
247.23	4.99
247.5	4.28
247.77	3.52
248.03	5.01
248.3	3.17
248.57	4.66
248.84	4.87
249.1	5.66
249.37	3.63
249.64	5.76
249.9	5.3
250.17	4.29
250.44	6.69
250.7	2.91
250.97	3.28
251.24	4.25
251.5	3.05
251.77	5.39
252.04	5.52
252.31	6.48
252.57	3.58
252.84	5.94
253.11	3.28
253.37	4.66
253.64	4.39
253.91	4.05
254.17	3.2
254.44	5.15
254.71	3.11
254.97	4.86
255.24	4.79
255.51	1.92
255.77	2.72
256.04	5.6
256.31	5.24
256.57	3.01
256.84	4.75
257.11	4.42
257.38	4.8
257.64	2.38
257.91	3.8
258.18	5.78
258.44	5.03
258.71	6.28
258.98	4.76
259.24	5.09
259.51	2.4
259.78	4.76
260.04	3.92
260.31	2.22
260.58	2.3
260.84	3.13
261.11	5.21
261.38	4.39
261.64	4.27
261.91	4
262.18	4.98
262.44	4.04
262.71	3.99
262.98	2.85
263.24	3.57
263.51	4.21
263.78	4.87
264.04	4.45
264.31	4.81
264.58	6.01
264.84	2.13
265.11	1.46
265.38	2.48
265.64	5.54
265.91	2.17
266.18	2.03
266.44	4.25
266.71	3.92
266.97	5.63
267.24	3.53
267.51	6.69
267.77	4.85
268.04	5.82
268.31	4.39
268.57	3.31
268.84	3.47
269.11	3.86
269.37	6.33
269.64	6.77
269.91	4.41
270.17	3.39
270.44	4.42
270.71	4.99
270.97	6.51
271.24	4.95
271.5	5.49
271.77	3.39
272.04	4.92
272.3	4.3
272.57	5.05
272.84	2.59
273.1	5.18
273.37	3.73
273.64	3.81
273.9	5.51
274.17	4.61
274.44	4.1
274.7	4.01
274.97	4.45
275.23	2.84
275.5	3.86
275.77	4.12
276.03	6.34
276.3	3.07
276.57	6.93
276.83	6.55
277.1	4.29
277.36	5.08
277.63	5.77
277.9	6.17
278.16	3.73
278.43	3.85
278.7	3.46
278.96	3.61
279.23	4.47
279.49	5.88
279.76	4.59
280.03	2.97
280.29	4.54
280.56	5.39
280.83	4.91
281.09	4.73
281.36	4.1
281.62	4.14
281.89	5.92
282.16	6.05
282.42	4.97
282.69	3.67
282.96	4.49
283.22	5.07
283.49	3.88
283.75	5.2
284.02	2.48
284.29	4.25
284.55	2.42
284.82	4.44
285.08	3.38
285.35	4.38
285.62	6.19
285.88	4.51
286.15	6.81
286.41	5.85
286.68	6.31
286.95	5.55
287.21	3.77
287.48	6.52
287.74	6.54
288.01	5.29
288.28	5.2
288.54	5.33
288.81	3.71
289.07	5.32
289.34	4.56
289.61	5.19
289.87	4.12
290.14	5
290.4	3.55
290.67	5.07
290.94	5.09
291.2	7
291.47	2.3
291.73	7.48
292	6.12
292.27	4.08
292.53	7.39
292.8	6.08
293.06	5.95
293.33	6.4
293.6	5.77
293.86	4.82
294.13	3.1
294.39	4.61
294.66	4.72
294.93	4.06
295.19	4.44
295.46	5.54
295.72	6.4
295.99	5.77
296.25	6.82
296.52	5.13
296.79	6.5
297.05	5.16
297.32	6.54
297.58	6.07
297.85	4.57
298.11	6.32
298.38	5.59
298.65	4.02
298.91	3.33
299.18	6.4
299.44	3.49
299.71	5.14
299.98	4.97
300.24	5.83
300.51	7.54
300.77	3.92
301.04	6.32
301.3	4.85
301.57	5.27
301.84	4.87
302.1	5.57
302.37	5.71
302.63	5.88
302.9	6.38
303.16	4.75
303.43	6.5
303.69	4.5
303.96	4.24
304.23	5.04
304.49	6.06
304.76	6.58
305.02	5.64
305.29	6.89
305.55	6.98
305.82	3.39
306.08	3.81
306.35	4.25
306.62	5.5
306.88	5.18
307.15	5.38
307.41	3.16
307.68	5.3
307.94	4.62
308.21	5.62
308.47	7.74
308.74	8.2
309.01	7.74
309.27	5.65
309.54	4.86
309.8	5.14
310.07	5.45
310.33	6.56
310.6	7.12
310.86	6.29
311.13	6.89
311.39	5.65
311.66	6.21
311.93	6.82
312.19	6.96
312.46	9.09
312.72	8.7
312.99	6.65
313.25	7.24
313.52	3.6
313.78	4.45
314.05	5.93
314.31	7.72
314.58	5.13
314.85	5.67
315.11	3.29
315.38	2.23
315.64	5.81
315.91	5.12
316.17	6.14
316.44	4.41
316.7	3.7
316.97	5.57
317.23	5.92
317.5	6.74
317.76	6.07
318.03	5.61
318.29	4.44
318.56	3.71
318.82	5.76
319.09	6.25
319.35	4.27
319.62	4.46
319.89	4.65
320.15	5.6
320.42	6.25
320.68	6.11
320.95	4.79
321.21	7.47
321.48	5.94
321.74	4.63
322.01	6.64
322.27	7.72
322.54	5.81
322.8	6.3
323.07	5.96
323.33	6.59
323.6	5.22
323.86	6.8
324.13	7.09
324.39	7.16
324.66	6.47
324.92	5.7
325.19	6.9
325.45	5.01
325.72	7.07
325.98	5.4
326.25	5.75
326.51	7.8
326.78	8.61
327.04	7.45
327.31	5.45
327.57	6.43
327.84	6.76
328.1	4.73
328.37	6.24
328.63	6.88
328.9	7.14
329.16	5.82
329.43	7.21
329.69	7.37
329.96	6.62
330.22	7.2
330.49	8.92
330.75	7.6
331.02	6.88
331.28	6.96
331.55	7.37
331.81	7.79
332.08	7.44
332.34	7.37
332.61	7.18
332.87	8.09
333.14	4.88
333.4	7.91
333.67	7.8
333.93	7.5
334.2	7.14
334.46	10.32
334.73	8.72
334.99	9.48
335.26	10.45
335.52	8.79
335.79	8.09
336.05	6.66
336.32	9.29
336.58	9.08
336.85	9.7
337.11	10.86
337.37	10.49
337.64	10.74
337.9	11.14
338.17	8.96
338.43	9.53
338.7	12.04
338.96	10.64
339.23	11.43
339.49	11.34
339.76	10.81
340.02	10.71
340.29	11.62
340.55	12.89
340.82	12.09
341.08	12.21
341.35	12.16
341.61	11.62
341.87	11.46
342.14	13.12
342.4	16.05
342.67	14.03
342.93	15.68
343.2	15.56
343.46	15.34
343.73	12.55
343.99	15.19
344.26	14.62
344.52	13.37
344.79	16.05
345.05	17.4
345.31	17.51
345.58	16.87
345.84	19.08
346.11	16.32
346.37	17.47
346.64	18.07
346.9	18.88
347.17	18.69
347.43	19.56
347.7	18.99
347.96	21.56
348.22	22.04
348.49	21.65
348.75	21.31
349.02	21.53
349.28	21.03
349.55	23.32
349.81	23.95
350.08	22.12
350.34	24.07
350.6	24.19
350.87	24.79
351.13	24.86
351.4	26.04
351.66	27.13
351.93	29.31
352.19	27.73
352.46	26.45
352.72	27.99
352.98	29.01
353.25	29.62
353.51	31.53
353.78	31.21
354.04	31.45
354.31	32.89
354.57	31.98
354.83	33.1
355.1	32.99
355.36	31.86
355.63	34.58
355.89	33.62
356.16	32.6
356.42	32.49
356.68	35.47
356.95	33.46
357.21	36.55
357.48	41.03
357.74	40.61
358.01	42.46
358.27	43.01
358.53	45.95
358.8	44.62
359.06	44.83
359.33	47.47
359.59	48.84
359.85	50.37
360.12	50.03
360.38	51.74
360.65	52.35
360.91	55.01
361.18	57.23
361.44	61.06
361.7	63.89
361.97	63.97
362.23	65.55
362.5	64.91
362.76	63.86
363.02	62.69
363.29	65.69
363.55	66.31
363.82	66.73
364.08	64.6
364.34	70.26
364.61	68.64
364.87	66.13
365.14	70.22
365.4	71.78
365.66	74.37
365.93	70.84
366.19	73.82
366.46	73.86
366.72	74.23
366.98	76.28
367.25	75.13
367.51	78.84
367.78	79.54
368.04	78.1
368.3	80.25
368.57	81.1
368.83	80.2
369.1	80.99
369.36	82.5
369.62	81.58
369.89	83.21
370.15	88.27
370.42	89.89
370.68	89.65
370.94	89.79
371.21	89.46
371.47	89.7
371.74	90.14
372	91.72
372.26	95.4
372.53	94.01
372.79	95.29
373.05	98.15
373.32	98.51
373.58	97.34
373.85	99.57
374.11	100.3
374.37	103.91
374.64	101.2
374.9	100.85
375.16	105.17
375.43	107.03
375.69	107.16
375.96	106.28
376.22	108.06
376.48	108.91
376.75	110.09
377.01	111.93
377.27	115.3
377.54	113.96
377.8	114.35
378.07	116.26
378.33	115.42
378.59	113.62
378.86	117.05
379.12	116.94
379.38	119.7
379.65	120.08
379.91	123.88
380.18	124.71
380.44	127.39
380.7	125.52
380.97	127.31
381.23	126.48
381.49	132.01
381.76	131.61
382.02	131.38
382.28	132.76
382.55	134
382.81	132.71
383.07	134.55
383.34	138.41
383.6	136.9
383.87	138.54
384.13	138.98
384.39	141.39
384.66	142.38
384.92	146.18
385.18	145.74
385.45	144.96
385.71	146.53
385.97	148.83
386.24	150.81
386.5	150.21
386.76	151.75
387.03	154.37
387.29	154.71
387.55	153.76
387.82	154.18
388.08	159.95
388.34	162.49
388.61	160.11
388.87	159.86
389.13	163.36
389.4	161.23
389.66	170.22
389.92	167.68
390.19	166.37
390.45	172.34
390.71	169.98
390.98	170.23
391.24	169.19
391.5	172.65
391.77	175.38
392.03	175.43
392.29	176.54
392.56	178.41
392.82	179.31
393.08	179.08
393.35	182.38
393.61	180.29
393.87	185.07
394.14	185.86
394.4	183.51
394.66	188.71
394.93	188.41
395.19	187.82
395.45	190.22
395.72	196.41
395.98	195.82
396.24	196.31
396.51	200.77
396.77	198.69
397.03	199.49
397.3	203.1
397.56	199.79
397.82	210.7
398.08	205.85
398.35	208.07
398.61	207.23
398.87	210.2
399.14	213.61
399.4	211.69
399.66	216.63
399.93	218.34
400.19	226.16
400.45	217.04
400.72	221.99
400.98	221.29
401.24	218.25
401.5	226.51
401.77	224.94
402.03	230.14
402.29	228.12
402.56	229.17
402.82	230.84
403.08	235.29
403.35	237.83
403.61	239.23
403.87	246.48
404.14	242.46
404.4	244.56
404.66	242.71
404.92	254.11
405.19	249.87
405.45	252.56
405.71	259.54
405.98	253.34
406.24	254.37
406.5	258.5
406.76	263.93
407.03	258.86
407.29	260.13
407.55	261.73
407.82	266.16
408.08	266.1
408.34	267.99
408.6	271.55
408.87	276.55
409.13	270.12
409.39	273.7
409.66	279.21
409.92	283.05
410.18	276.49
410.44	280.37
410.71	288.56
410.97	288.59
411.23	286.32
411.5	290.31
411.76	287.56
412.02	292.75
412.28	292.41
412.55	299.1
412.81	303.83
413.07	297.34
413.33	306.05
413.6	307.14
413.86	310.14
414.12	307.42
414.39	314.6
414.65	312.15
414.91	312.65
415.17	316.19
415.44	319.09
415.7	326.05
415.96	326.13
416.22	323.69
416.49	327.07
416.75	326.15
417.01	325.32
417.27	332.34
417.54	329.44
417.8	339.83
418.06	341.47
418.32	341.38
418.59	344.56
418.85	343.92
419.11	351.09
419.37	346.66
419.64	345.06
419.9	358.27
420.16	352.15
420.42	361.77
420.69	360.8
420.95	357.38
421.21	363.98
421.47	358.86
421.74	367
422	362.48
422.26	364.01
422.52	375.65
422.79	372.29
423.05	379.92
423.31	371.95
423.57	387.15
423.84	387.1
424.1	382.52
424.36	394.27
424.62	392.68
424.89	396.99
425.15	387.37
425.41	398.34
425.67	396.58
425.94	399.55
426.2	406.75
426.46	411.56
426.72	412.83
426.99	400.93
427.25	406.72
427.51	412.45
427.77	402.87
428.03	418.78
428.3	422.84
428.56	421.99
428.82	423.18
429.08	421.74
429.35	429.78
429.61	442.19
429.87	440.81
430.13	444.67
430.39	443.28
430.66	443.97
430.92	453
431.18	452.59
431.44	461.65
431.71	452.23
431.97	451.23
432.23	459.9
432.49	474.66
432.75	473.63
433.02	473.2
433.28	471.95
433.54	484.21
433.8	481.84
434.07	478.58
434.33	480.53
434.59	499.47
434.85	503.79
435.11	486.94
435.38	489.9
435.64	497.6
435.9	494.71
436.16	498.48
436.42	518.05
436.69	504.36
436.95	508.57
437.21	509.09
437.47	514.47
437.73	519.9
438	522.14
438.26	530.81
438.52	537.64
438.78	536.72
439.04	535.97
439.31	539.54
439.57	538.87
439.83	562.34
440.09	550.46
440.35	550.15
440.62	542.22
440.88	552.22
441.14	570.05
441.4	571.47
441.66	569.61
441.93	562.3
442.19	576.72
442.45	575.59
442.71	572.31
442.97	584.48
443.23	584.07
443.5	576.94
443.76	576.02
444.02	588.09
444.28	593.41
444.54	583.7
444.81	604.42
445.07	610.34
445.33	606.39
445.59	612.38
445.85	618.52
446.11	595.81
446.38	611.8
446.64	615.46
446.9	611.57
447.16	625.07
447.42	623.36
447.69	629.81
447.95	635.75
448.21	629.82
448.47	628.38
448.73	643.53
448.99	632.93
449.26	650.85
449.52	628.37
449.78	652.59
450.04	652.07
450.3	651.58
450.56	663.81
450.83	663.18
451.09	669.24
451.35	665.66
451.61	668.18
451.87	658.47
452.13	671.01
452.4	667.04
452.66	680.31
452.92	699.95
453.18	670.91
453.44	704.57
453.7	700.11
453.96	708.45
454.23	707.77
454.49	720.85
454.75	702.33
455.01	702.86
455.27	714.89
455.53	710.75
455.8	715.39
456.06	728.2
456.32	711.07
456.58	728.98
456.84	739.65
457.1	734.06
457.36	742.39
457.63	740.28
457.89	747.71
458.15	744.25
458.41	765.15
458.67	775.38
458.93	777.63
459.19	771.82
459.46	781
459.72	787.42
459.98	789.63
460.24	774.83
460.5	788.44
460.76	818.27
461.02	805.13
461.28	814.55
461.55	810.24
461.81	817.74
462.07	833.02
462.33	820.26
462.59	831.28
462.85	833.33
463.11	849.76
463.38	861.51
463.64	859.85
463.9	877.15
464.16	864.15
464.42	875.21
464.68	881.25
464.94	888.94
465.2	913.66
465.46	931.73
465.73	924.84
465.99	907.52
466.25	937.67
466.51	927.1
466.77	950.58
467.03	955.14
467.29	939.42
467.55	972.57
467.82	971.81
468.08	987.43
468.34	976.93
468.6	1000.13
468.86	1012.03
469.12	1034.91
469.38	1027.53
469.64	1034.2
469.9	1042.94
470.17	1055.54
470.43	1059.66
470.69	1070.14
470.95	1079.15
471.21	1102.49
471.47	1121.12
471.73	1139.46
471.99	1122.83
472.25	1133.49
472.51	1117.67
472.78	1154.06
473.04	1160.72
473.3	1168.81
473.56	1174.71
473.82	1188.64
474.08	1197.75
474.34	1202.32
474.6	1230.58
474.86	1216.47
475.12	1252.14
475.39	1251.19
475.65	1289.21
475.91	1266.52
476.17	1300.35
476.43	1300.11
476.69	1322.91
476.95	1336.24
477.21	1344.31
477.47	1377.2
477.73	1387.68
477.99	1386.96
478.25	1403.83
478.52	1438.59
478.78	1421.06
479.04	1443.87
479.3	1438.88
479.56	1472.12
479.82	1489.95
480.08	1498.15
480.34	1509.83
480.6	1516.95
480.86	1542.12
481.12	1549
481.38	1575.13
481.64	1581.88
481.91	1596.74
482.17	1621.49
482.43	1627.89
482.69	1612.39
482.95	1660.24
483.21	1663.1
483.47	1675.14
483.73	1685.55
483.99	1702.94
484.25	1717.46
484.51	1725.88
484.77	1756.97
485.03	1774.44
485.29	1773.01
485.55	1786.15
485.82	1830.78
486.08	1814.33
486.34	1822.58
486.6	1843.03
486.86	1875.87
487.12	1883.58
487.38	1904.44
487.64	1932.52
487.9	1912.58
488.16	1939.21
488.42	1964.48
488.68	1962.64
488.94	1985.02
489.2	2008.9
489.46	2006.25
489.72	2010.46
489.98	2035.09
490.24	2048.13
490.51	2054.58
490.77	2071.35
491.03	2084.77
491.29	2094.15
491.55	2103.03
491.81	2136.18
492.07	2136.38
492.33	2158.62
492.59	2174.33
492.85	2180.24
493.11	2195.83
493.37	2186.9
493.63	2215.7
493.89	2214.03
494.15	2228.93
494.41	2241.97
494.67	2257.11
494.93	2279.78
495.19	2297.82
495.45	2296.33
495.71	2321.33
495.97	2315.73
496.23	2345.5
496.49	2357.53
496.75	2356.32
497.01	2360.73
497.27	2379.23
497.53	2379.96
497.79	2402.96
498.06	2383.93
498.32	2425.7
498.58	2412.66
498.84	2445.18
499.1	2448.14
499.36	2459.92
499.62	2464.29
499.88	2462.44
500.14	2498.9
500.4	2504.75
500.66	2514.75
500.92	2522.13
501.18	2530.54
501.44	2528.49
501.7	2540.28
501.96	2543.71
502.22	2546.35
502.48	2573.38
502.74	2579.4
503	2588.24
503.26	2608.78
503.52	2609.43
503.78	2605.74
504.04	2627.25
504.3	2637.78
504.56	2650.63
504.82	2664.85
505.08	2644.77
505.34	2672.84
505.6	2685.43
505.86	2703.02
506.12	2714.56
506.38	2721.83
506.64	2743.94
506.9	2718.63
507.16	2743.54
507.42	2758.67
507.68	2762.22
507.94	2761.41
508.2	2770.11
508.46	2791.83
508.72	2804.4
508.98	2822.73
509.24	2811.42
509.5	2828.8
509.76	2827.14
510.02	2831.01
510.28	2846.38
510.54	2858.39
510.8	2838.54
511.06	2871.75
511.32	2874.21
511.58	2880.17
511.84	2911.41
512.1	2909.1
512.36	2927.58
512.62	2915.31
512.88	2943.75
513.14	2933.31
513.39	2955.85
513.65	2960.32
513.91	2964.97
514.17	2953.97
514.43	2977.01
514.69	2990.26
514.95	2975.42
515.21	3007.42
515.47	3001.94
515.73	3037.32
515.99	3013.88
516.25	3040.81
516.51	3049.32
516.77	3052.04
517.03	3072.26
517.29	3083.86
517.55	3092.65
517.81	3102.19
518.07	3120.4
518.33	3110.55
518.59	3146.95
518.85	3135.88
519.11	3155.54
519.37	3147.98
519.63	3161.58
519.89	3180.01
520.15	3175.68
520.41	3177.43
520.67	3202.87
520.92	3194.03
521.18	3191.16
521.44	3233.86
521.7	3216.29
521.96	3238.07
522.22	3249.5
522.48	3265.75
522.74	3268.48
523	3295.63
523.26	3307.28
523.52	3298.14
523.78	3302.31
524.04	3318.88
524.3	3330.12
524.56	3335.22
524.82	3361.31
525.08	3389.69
525.34	3386.76
525.59	3376.89
525.85	3394.43
526.11	3388.61
526.37	3390.47
526.63	3421.93
526.89	3433.28
527.15	3418.72
527.41	3436.94
527.67	3413.19
527.93	3434.62
528.19	3459.37
528.45	3461.82
528.71	3480.3
528.97	3458.26
529.23	3482.03
529.48	3485.98
529.74	3510.23
530	3510.37
530.26	3529.5
530.52	3542.93
530.78	3526.19
531.04	3542.22
531.3	3577.89
531.56	3564.01
531.82	3610.26
532.08	3580.76
532.34	3612.41
532.6	3608.3
532.85	3625.2
533.11	3622.34
533.37	3617.42
533.63	3631.73
533.89	3643.51
534.15	3636.68
534.41	3657.99
534.67	3691.01
534.93	3670.78
535.19	3680.78
535.45	3683.66
535.7	3711.96
535.96	3738.25
536.22	3729.88
536.48	3711.55
536.74	3743.68
537	3739.42
537.26	3760.57
537.52	3757.39
537.78	3762.34
538.04	3764.09
538.29	3773.76
538.55	3797.27
538.81	3791.26
539.07	3824.15
539.33	3810.57
539.59	3792.04
539.85	3849.63
540.11	3870.28
540.37	3840.06
540.63	3863.87
540.88	3862.99
541.14	3866.88
541.4	3884.41
541.66	3903.66
541.92	3878.61
542.18	3901.4
542.44	3895.5
542.7	3915.28
542.96	3933.43
543.21	3919.98
543.47	3927.72
543.73	3938.2
543.99	3966.44
544.25	3979.87
544.51	3976.31
544.77	3987.83
545.03	3976.97
545.28	3983.43
545.54	3981.74
545.8	3986.42
546.06	4019.44
546.32	3993.35
546.58	4055.11
546.84	4011.44
547.1	4024.54
547.35	4034.3
547.61	4060.75
547.87	4052.49
548.13	4083.34
548.39	4070.69
548.65	4083.06
548.91	4086.48
549.17	4105.13
549.42	4103.41
549.68	4114.47
549.94	4100.34
550.2	4103.22
550.46	4140.67
550.72	4129.5
550.98	4137.7
551.23	4140.81
551.49	4153.94
551.75	4188.37
552.01	4199.87
552.27	4153.96
552.53	4178.2
552.79	4191.47
553.04	4191.82
553.3	4219.22
553.56	4221.67
553.82	4238.67
554.08	4223.08
554.34	4230.43
554.59	4213.83
554.85	4235.11
555.11	4275.37
555.37	4243.86
555.63	4290.49
555.89	4263.91
556.15	4279.6
556.4	4291.73
556.66	4314.44
556.92	4309.87
557.18	4301.91
557.44	4326.7
557.7	4325.4
557.95	4309.19
558.21	4278.28
558.47	4329.84
558.73	4339.22
558.99	4357.6
559.25	4351.81
559.5	4382.75
559.76	4392.18
560.02	4402.91
560.28	4425.35
560.54	4398.37
560.8	4436.02
561.05	4392.47
561.31	4416.42
561.57	4424.52
561.83	4410.37
562.09	4404.2
562.35	4447.06
562.6	4466.6
562.86	4460.53
563.12	4445.28
563.38	4467.11
563.64	4458.54
563.89	4487.77
564.15	4520.29
564.41	4524.25
564.67	4480.72
564.93	4507.71
565.18	4508.33
565.44	4540.46
565.7	4508.03
565.96	4548.17
566.22	4555.61
566.48	4538.83
566.73	4608.98
566.99	4555.12
567.25	4598.41
567.51	4596.65
567.77	4606.17
568.02	4597.19
568.28	4604.32
568.54	4605.42
568.8	4610.35
569.06	4641.91
569.31	4634.97
569.57	4648.13
569.83	4625.77
570.09	4657.58
570.35	4641.23
570.6	4659.83
570.86	4663.43
571.12	4683.28
571.38	4695.64
571.64	4683.84
571.89	4739.93
572.15	4708.57
572.41	4725.53
572.67	4710.65
572.92	4741.48
573.18	4735.27
573.44	4736.4
573.7	4729.8
573.96	4742.77
574.21	4737.78
574.47	4739.11
574.73	4733.51
574.99	4741.99
575.25	4736.98
575.5	4783.65
575.76	4772.92
576.02	4742.19
576.28	4804.79
576.53	4773.29
576.79	4816.36
577.05	4795.34
577.31	4792.82
577.57	4793.19
577.82	4811.01
578.08	4828.95
578.34	4817.35
578.6	4856.07
578.85	4833.8
579.11	4848.77
579.37	4869.15
579.63	4850
579.88	4863.71
580.14	4862.5
580.4	4859.06
580.66	4841.18
580.92	4877.95
581.17	4906.52
581.43	4870.02
581.69	4881.2
581.95	4915.56
582.2	4899.9
582.46	4937.6
582.72	4892.2
582.98	4917.61
583.23	4926.22
583.49	4952.66
583.75	4933.01
584.01	4946.48
584.26	4946.66
584.52	4940.18
584.78	4938.23
585.04	4961.68
585.29	4949.29
585.55	4971.56
585.81	4958.04
586.07	4969.11
586.32	4977.71
586.58	4983.77
586.84	5001.34
587.1	4956.42
587.35	5007.26
587.61	4959.74
587.87	5007.76
588.13	4981.65
588.38	5000.55
588.64	5011.37
588.9	5004.37
589.15	5033.16
589.41	5044.03
589.67	5019.99
589.93	5050.99
590.18	5047.24
590.44	5051.36
590.7	5051.42
590.96	5029.57
591.21	5091.64
591.47	5056.26
591.73	5108.51
591.98	5085.16
592.24	5097.47
592.5	5084.83
592.76	5063.03
593.01	5106.23
593.27	5083.88
593.53	5066.87
593.79	5092.31
594.04	5084.17
594.3	5110.45
594.56	5116.97
594.81	5091.7
595.07	5107.21
595.33	5109.65
595.59	5114.49
595.84	5087.88
596.1	5115.28
596.36	5112.2
596.61	5134.21
596.87	5140.76
597.13	5159.66
597.39	5150.75
597.64	5166.06
597.9	5176.43
598.16	5173.16
598.41	5158.68
598.67	5140.96
598.93	5190.5
599.18	5175.3
599.44	5158.99
599.7	5208.39
599.96	5189.5
600.21	5197.33
600.47	5198.02
600.73	5208.98
600.98	5197.91
601.24	5217.02
601.5	5202.75
601.75	5214.34
602.01	5236.92
602.27	5248.64
602.52	5244
602.78	5230.64
603.04	5249.55
603.3	5274.77
603.55	5226.68
603.81	5243.84
604.07	5301.25
604.32	5288.18
604.58	5270.57
604.84	5227.38
605.09	5244.13
605.35	5264.12
605.61	5280.61
605.86	5264.94
606.12	5247.4
606.38	5280.76
606.63	5251.92
606.89	5290.6
607.15	5272.9
607.4	5286.92
607.66	5317.29
607.92	5277.08
608.17	5318.96
608.43	5290.03
608.69	5304.03
608.94	5316.44
609.2	5292.26
609.46	5310.33
609.71	5316.22
609.97	5339.35
610.23	5354.26
610.48	5329.58
610.74	5326.97
611	5338.63
611.25	5350.86
611.51	5358.77
611.77	5347.6
612.02	5391.27
612.28	5362.67
612.54	5365.32
612.79	5358.59
613.05	5386.87
613.31	5384.86
613.56	5368.66
613.82	5398.47
614.08	5414.55
614.33	5423.54
614.59	5397.37
614.85	5430.09
615.1	5398.8
615.36	5444.85
615.62	5428.36
615.87	5442.6
616.13	5463.68
616.38	5501.58
616.64	5466.26
616.9	5477.81
617.15	5495.06
617.41	5473.28
617.67	5498.99
617.92	5519.7
618.18	5491.87
618.44	5478.77
618.69	5497.02
618.95	5477.23
619.21	5509.61
619.46	5472.03
619.72	5488.78
619.97	5524.76
620.23	5515.89
620.49	5481.68
620.74	5504.67
621	5503.17
621.26	5517.82
621.51	5488.47
621.77	5546.06
622.02	5516.32
622.28	5515.19
622.54	5536.35
622.79	5546.39
623.05	5562.17
623.31	5595.16
623.56	5592.04
623.82	5587.59
624.07	5571.35
624.33	5617.14
624.59	5569.72
624.84	5582.54
625.1	5614.44
625.35	5604.84
625.61	5644.42
625.87	5623.82
626.12	5660.72
626.38	5641.36
626.64	5634.63
626.89	5627.07
627.15	5579.77
627.4	5610.46
627.66	5617.13
627.92	5617.87
628.17	5628.46
628.43	5649.93
628.68	5645.33
628.94	5624.77
629.2	5665.52
629.45	5638.07
629.71	5637.62
629.96	5649.53
630.22	5631.48
630.48	5666.58
630.73	5623.15
630.99	5648.41
631.24	5612.35
631.5	5610.86
631.76	5650.86
632.01	5669.48
632.27	5616.82
632.52	5630.73
632.78	5681.74
633.03	5668.45
633.29	5666.11
633.55	5666.83
633.8	5669.91
634.06	5613.89
634.31	5638.83
634.57	5666.36
634.83	5614.38
635.08	5652.1
635.34	5636.12
635.59	5638.26
635.85	5603.18
636.1	5631.2
636.36	5661.95
636.62	5614.06
636.87	5616.9
637.13	5636.13
637.38	5627.56
637.64	5628.94
637.89	5656.47
638.15	5649.59
638.41	5632.35
638.66	5637.43
638.92	5644.12
639.17	5683.63
639.43	5673.24
639.68	5632.76
639.94	5618.92
640.2	5662.53
640.45	5617.81
640.71	5693.95
640.96	5698.79
641.22	5685.27
641.47	5707.3
641.73	5665.18
641.98	5690.5
642.24	5674.66
642.5	5674.76
642.75	5628.94
643.01	5673.69
643.26	5665.4
643.52	5656.65
643.77	5658.36
644.03	5695.39
644.28	5688.82
644.54	5663.2
644.8	5650.69
645.05	5672.47
645.31	5684.18
645.56	5678.18
645.82	5671.99
646.07	5663.08
646.33	5625
646.58	5669.15
646.84	5651.24
647.09	5684.12
647.35	5687.95
647.61	5664.27
647.86	5640.29
648.12	5671.78
648.37	5669.52
648.63	5691.44
648.88	5638.86
649.14	5642.58
649.39	5639.76
649.65	5654.14
649.9	5630.18
650.16	5667.74
650.41	5635.39
650.67	5652.8
650.92	5625.31
651.18	5662.92
651.43	5650.8
651.69	5638.88
651.94	5625.55
652.2	5670.03
652.46	5629.78
652.71	5673.87
652.97	5651.69
653.22	5647.4
653.48	5659.81
653.73	5669.13
653.99	5688.41
654.24	5658.61
654.5	5727.53
654.75	5637.46
655.01	5657.01
655.26	5635.95
655.52	5692.55
655.77	5646.2
656.03	5693.31
656.28	5653.23
656.54	5652.76
656.79	5632.48
657.05	5654.84
657.3	5643.99
657.56	5648.58
657.81	5650.12
658.07	5650.69
658.32	5630.46
658.58	5662.95
658.83	5665.68
659.09	5675.28
659.34	5656.2
659.6	5634.84
659.85	5652.91
660.11	5672.52
660.36	5654.84
660.62	5670.48
660.87	5650.24
661.13	5684.95
661.38	5649.72
661.64	5706.04
661.89	5661.24
662.15	5662.29
662.4	5666.7
662.66	5641.09
662.91	5662.14
663.17	5652.57
663.42	5631.39
663.68	5660.9
663.93	5702.69
664.18	5621.52
664.44	5682.07
664.69	5722.31
664.95	5719.13
665.2	5675.18
665.46	5707.17
665.71	5660.34
665.97	5719.22
666.22	5684.18
666.48	5663.21
666.73	5626.91
666.99	5672.98
667.24	5652.9
667.5	5655.95
667.75	5648.72
668.01	5630.56
668.26	5624.77
668.52	5623.12
668.77	5625.83
669.02	5594.8
669.28	5587.32
669.53	5604.9
669.79	5627.71
670.04	5653.86
670.3	5642.81
670.55	5655.68
670.81	5670.48
671.06	5654.7
671.32	5661.26
671.57	5655.08
671.82	5656.42
672.08	5630.03
672.33	5640.14
672.59	5590.4
672.84	5612.64
673.1	5582.93
673.35	5590.59
673.61	5611.28
673.86	5569.01
674.11	5570.41
674.37	5603.01
674.62	5602.5
674.88	5600.69
675.13	5584.58
675.39	5570.02
675.64	5624.62
675.9	5559.65
676.15	5557.91
676.4	5572.26
676.66	5533.07
676.91	5576.78
677.17	5577.04
677.42	5583.19
677.68	5558.41
677.93	5590.65
678.18	5565.96
678.44	5544.04
678.69	5568.43
678.95	5554.5
679.2	5557.37
679.46	5558.73
679.71	5551.17
679.96	5547.46
680.22	5555.6
680.47	5562.32
680.73	5557.15
680.98	5588.09
681.24	5545.97
681.49	5555.86
681.74	5562.28
682	5534.72
682.25	5572.76
682.51	5506.78
682.76	5546.68
683.01	5524.94
683.27	5498.28
683.52	5511.75
683.78	5495.3
684.03	5491.7
684.28	5477.9
684.54	5504.44
684.79	5483.4
685.05	5483.58
685.3	5461.69
685.56	5473.75
685.81	5405.67
686.06	5485.03
686.32	5431.68
686.57	5462.64
686.83	5450.89
687.08	5431.85
687.33	5444.41
687.59	5435.18
687.84	5430.59
688.09	5460.69
688.35	5433.02
688.6	5512
688.86	5486.09
689.11	5464.91
689.36	5466.74
689.62	5481.86
689.87	5497.43
690.13	5471.04
690.38	5489.87
690.63	5441.42
690.89	5452.84
691.14	5454.97
691.4	5440.9
691.65	5441.48
691.9	5439.91
692.16	5416.37
692.41	5462.36
692.66	5432.21
692.92	5403.86
693.17	5392.13
693.43	5405.22
693.68	5394.31
693.93	5350.98
694.19	5386.19
694.44	5412.2
694.69	5370.56
694.95	5370.79
695.2	5395.16
695.46	5401.3
695.71	5363.55
695.96	5381.96
696.22	5351.4
696.47	5335.02
696.72	5376.18
696.98	5324.24
697.23	5318.92
697.48	5326.99
697.74	5313.7
697.99	5335.66
698.25	5302.61
698.5	5353.05
698.75	5311.47
699.01	5350.56
699.26	5333.97
699.51	5309.82
699.77	5295.18
700.02	5263.25
700.27	5308.21
700.53	5296.75
700.78	5339.71
701.03	5306.92
701.29	5317.75
701.54	5328.97
701.79	5309.64
702.05	5335.77
702.3	5306.84
702.55	5342.91
702.81	5294.03
703.06	5297.49
703.31	5290.26
703.57	5300.82
703.82	5298.23
704.07	5306.01
704.33	5292.57
704.58	5247.12
704.83	5228.66
705.09	5211.69
705.34	5220.02
705.59	5240.18
705.85	5217.05
706.1	5235.49
706.35	5231.66
706.61	5245.22
706.86	5204.56
707.11	5252.15
707.37	5222.8
707.62	5196.9
707.87	5205
708.13	5189.42
708.38	5202.28
708.63	5195.92
708.89	5195.13
709.14	5176.46
709.39	5198.24
709.65	5190.8
709.9	5164.37
710.15	5192.06
710.41	5180.39
710.66	5181.09
710.91	5177.65
711.17	5157.45
711.42	5153.85
711.67	5147.12
711.92	5157.4
712.18	5146.18
712.43	5143.15
712.68	5155.62
712.94	5116.83
713.19	5155.51
713.44	5145.07
713.7	5155.92
713.95	5125.61
714.2	5113.27
714.45	5113.94
714.71	5108.57
714.96	5099.63
715.21	5078.82
715.47	5062.73
715.72	5099.27
715.97	5063.43
716.23	5072.93
716.48	5045.03
[truncated: 1,650 more rows]
