# Supplementary material for: Physiological and Transcriptomic Analysis Revealed the Molecular Mechanism of Pinus koraiensis Responses to Light
Source: Int J Mol Sci. 2022 Nov 6;23(21):13608. doi: 10.3390/ijms232113608 (PMC9653891; doi:10.3390/ijms232113608)
Supplement: Supplementary file 1 [file ijms-23-13608-s001.zip › Table S15 Specific primers used for qRT-PCR analysis.xlsx]

## Sheet: Sheet1
Supplemental Table S15. Specific primers used for qRT-PCR analysis
Name	Strand	Sequence
Cluster_27241_59853	+	GAACGCATCACTAAAATGTCGG
Cluster_27241_59853	-	TCAAAACTCAAAGACCTCACCA
Cluster_27241_60019	+	ATCATGTCCATTATCCCAAGCT
Cluster_27241_60019	-	AAAGGATCCCATACTTCCAAGG
Cluster_27241_61127	+	CATGGGTCATTGCCTCTACTG
Cluster_27241_61127	-	GATGGGAATGGGAGGTGATG
Cluster_27241_64501	+	GTAGAAACCCTCACCCTCAATG
Cluster_27241_64501	-	CAGATGCCGCTTCCAGTAG
Cluster_27241_65198	+	GCCACTTATCTGTAGAACTCGG
Cluster_27241_65198	-	GCCATAACCAACACTCAATTCG
Cluster_27241_65206	+	CTTCCACCTCTATCTTTACCTCC
Cluster_27241_65206	-	GGGATATTGGGCACTCTTCAAG
Cluster_27241_65212	+	CTTCCACCTCTATCTTTACCTCC
Cluster_27241_65212	-	TTTCAGGGATATTGGGCACTC
Cluster_27241_65219	+	GCCACTTATCTGTAGAACTCGG
Cluster_27241_65219	-	CCATAACCAACACCCAATTCG
Cluster_27241_65293	+	GTTGTACTCCTTAACGGCAAAG
Cluster_27241_65293	-	TGTATTGTGGGTGTGAGCAG
18S	+	GAGGTAGCTTCGGGCGCAACT
18S	-	GCAGGTTAGCGAAATGCGATAC
